# Supplementary material for: Structure and variation of the mitochondrial genome of fishes
Source: PubMed Central journal article supplement (PMC5015259; doi:10.1186/s12864-016-3054-y), 2016-09-07
Supplement: 12864_2016_3054_MOESM10_ESM.pdf [file 12864_2016_3054_MOESM10_ESM.pdf]

**Additional file 10: Figure S2. Aligned nucleotide sequences of the 12S rRNA gene in mt genomes of 249<sup>\*1</sup> fishes.**

Species name abbreviation followed by aligned nucleotide sequences. See Additional file 1 for abbreviation of species name. Highlighted letters with red background indicate stem regions, which are denoted by 1 and 1', 2 and 2' and so forth. Unhighlighted red letters indicate bulge structures. Highlighted green and blue letters show regions losing stem structure and tertiary interaction sites, respectively. 'HVR' indicates hyper variable region. See the legend of Additional file 5 for details. \*1 Data for one species were not obtained (See text.).

|      | 1        | 2         | 1'      | 3              | 4       | 5            | 6        |
|------|----------|-----------|---------|----------------|---------|--------------|----------|
| Scca | TGTT-AGG | TTTGGTCCT | GA-CCT  | TAGTGTTAATT    | GCA-ACT | AAAATT-A     | TAC-ATGC |
| Muma | TACA-AGG | TTTGGTCCT | GG-CCT  | TAGTGTTAATT    | GTA-ACT | AGAATT-A     | TAC-ATGC |
| Erca | -CAA-AGA | TTTGGTCCT | TAG-TCT | TACTATCATT     | TCC-ACT | AAAATT-ACAC  | -ATGC    |
| Pose | -CAA-AGA | TTTGGTCCT | TAG-TCT | TACTATCATT     | TCC-ACT | AAAATT-ACAC  | -ATGC    |
| Actr | -CAA-AGG | CTTGGTCCT | TGG-CCT | TACTATCAATT    | TTA-ACC | CAATTT-ACAC  | -ATGC    |
| Scal | -CAA-AGG | CTTGGTCCT | TGG-CCT | TACTATCAATT    | TTA-ACC | CAATTT-ATAC  | -ATGC    |
| Posp | -CAA-AGG | CTTGGTCCT | TGG-CCT | TACTATCAATT    | TTA-ACC | CAATTT-ACAC  | -ATGC    |
| Atsp | -CAA-AGG | CTTGGTCCT | TGG-CCT | TAGTATCAGT     | TTA-GCC | GAATTT-ACAC  | -ATGC    |
| Leoc | -CAA-AGG | CTTGGTCCT | TGG-CCT | TAGTATCAGT     | TTA-GCC | GAATTT-ACAC  | -ATGC    |
| Amca | -CAA-AGG | CTTGGTCCT | TGG-CCT | TACTATCATT     | CTA-ACT | GAACTT-ACAC  | -ATGC    |
| Osbi | -CAA-AAG | CATGGTCCC | GAT-CTT | TATGTCAGCT     | ACA-ACT | AAAATT-ACAC  | -ATGC    |
| Pabu | CTAC-AGG | CCTGGTCCC | CGG-CCT | TAAATATCAACT   | TTT-GCT | AAAATT-ACAC  | -ATGC    |
| Hial | -CAA-AGG | CCTGGTCCT | TGG-CTT | TACTATGTCGGCT  | TTA-ACC | AAAATT-ACAC  | -ATGC    |
| Elha | -CAA-AGG | CCTGGTCCT | TGG-CTT | TACTATCAACC    | CTA-ACC | GAGCTT-ACAC  | -ATGC    |
| Mlcy | -CAA-AGG | CCTGGTCCC | CGG-CTT | TACTATGTCAACT  | CCA-ACA | GAACTT-ACAC  | -ATGC    |
| Algl | -CAA-AGG | CTTGGTCCT | TGG-CTT | TACTATCAACT    | TTC-GTC | GATTT-ACAC   | -ATGC    |
| Ptgi | -CAA-GAG | TCTGGTCCT | TGG-CTT | TAAATATCAGT    | TTC-GTC | GAACTT-ACAC  | -ATGC    |
| Alaf | -CAA-AGG | CCTGGTCCT | TGG-CTT | TACTAGCGTCAGT  | TTC-ACT | AAAATT-ACAC  | -ATGC    |
| Nock | -CAA-AGG | CCTGGTCCT | TGG-CTT | TACTATCAGT     | TTC-ACT | AAAATT-ACAC  | -ATGC    |
| Anja | -CAA-AAG | CCTGGTCCT | TGG-CTT | TAAATATCAGT    | CTC-GCC | GACTT-ACAC   | -ATGC    |
| Gyki | -AAA-AAG | CCTGGTCCT | TGG-CTT | TAAATATCAGT    | GTA-ACC | CAATTT-ACAC  | -ATGC    |
| Syka | -CAA-AAG | CCTGGTCCT | TGG-CTT | TAAATATCAGT    | GTC-GCC | CAATTT-ACAC  | -ATGC    |
| Opma | -CAA-AGG | CCTGGTCCT | TGG-CTT | TAAATATCAGT    | TTA-ACC | CAATTT-ATAC  | -ATGC    |
| Comy | -CAA-AAG | CTTGGTCCT | TGG-CTT | TAAATATCAACT   | ATC-GCC | TAAATT-ACAC  | -ATGC    |
| Sasp | -TAA-AGG | TCTAGTCCT | TGG-CTT | TAAATATCAGCT   | ACT-ACC | CAATTT-ACAC  | -ATGC    |
| Eupe | -TAA-AGG | TCTAGTCCT | TGG-CTT | TAAATATCACT    | ATA-ATC | TAAATT-ACAC  | -ATGC    |
| Enja | -CAA-AGG | TTTGGTCCT | TAG-CCT | TACTATCAGCT    | TTA-GCT | CAATTT-ACAC  | -ATGC    |
| Same | -CAA-AGG | TTTGGTCCT | TAG-CTT | TACTATCAGCT    | TTA-ACC | CGAATTT-ACAC | -ATGC    |
| Chch | -CAA-AAG | CTTGGTCCT | TGG-CTT | TACTAGCGTCAGCT | TTA-ACC | TGATTT-ACAC  | -ATGC    |
| Grgr | -CAA-AGG | CTTGGTCCT | TGG-CTT | TACTAGTTCAGCT  | TTA-ACC | CGGATTT-ATAC | -ATGC    |
| Caau | -CAA-AGG | CATGGTCCC | GAT-CCT | TATATCAGCT     | TTA-ACT | CAATTT-ACAC  | -ATGC    |
| Cyca | -CAA-AGG | CATGGTCCC | GAT-CCT | TATATCAGCC     | CTA-ACT | CAATTT-ACAC  | -ATGC    |
| Dare | -CAA-AGG | CATGGTCCC | GAT-CCT | TTTTGATCAGCT   | TTT-ACC | TAAATTT-ACAC | -ATGC    |
| Cost | -CAA-AGG | CTTGGTCCT | TGG-CTT | TACTATCAGCT    | TTA-GCC | CGAATTT-ACAC | -ATGC    |
| Leec | -CAA-AGG | CTTGGTCCT | TGG-CTT | TTCATCAGCT     | TTA-GCA | CGAATTT-ACAC | -ATGC    |
| Cr1a | -CAA-AGG | CTTGGTCCT | TGG-CTT | TACTATCAGCC    | GTA-GCA | CAATTT-ACAC  | -ATGC    |
| Clmc | -CAA-AGG | CCTGGTCCC | CGG-CTT | TACTATCGGCT    | TTA-GCC | CAATTT-ATAC  | -ATGC    |
| Phin | -TAA-AGG | CCTGGTCCT | TGG-CTT | TACTATGTCAGCC  | TTA-ATC | CAATTT-ATAC  | -ATGC    |
| Icpu | -CAA-AGG | CTTGGTCCT | TGG-CTT | TACTATCAGCT    | TTA-GCC | CAATTT-ATAC  | -ATGC    |
| Psto | -CAA-AGG | CTTGGTCCT | TGG-CTT | TACTATCAGCT    | TTA-ACT | CAATTT-ATAC  | -ATGC    |
| Cora | -CAA-AGG | TTTGGTCCT | TAG-CTT | TACTATGTCAGCT  | TTA-ACC | TAAATTT-ATAC | -ATGC    |
| Eisp | -CAA-AGG | CTTGGTCCT | TGG-CTT | TACTATCAGCT    | GTA-GCC | CAATTT-ATAC  | -ATGC    |
| Apal | -TAA-AAG | CTTGGTCCT | TGG-CTT | TACTATCAGCT    | ATA-GCC | CAATTT-ATAC  | -ATGC    |

Es lu -CAA-AGGCTTGGTCCTGA-CCTTACATCAGCTTA-ACTAAA TTT-ACAC-ATGCAA  
 Dape -CAA-AGGCTTGGTCCTGA-CTTATATATCAGCTTA-ATTAAA CTT-ACAC-ATGCAA  
 Glse -CAA-AGGCTTGGTCCTGA-CTTITACATCAGCTTTI-ACCAAA ACT-ACAC-ATGCAA  
 Naar -CAA-AGGCTTGGTCCTGA-CTTITACATCAGCTTTI-GCCAGA TCT-ACAC-ATGCAA  
 Baoc -CAA-AGGCTTGGTCCTGA-CTTITACATCAGCTTTI-ACCAAA TTT-ACAC-ATGCAA  
 Opso TTAA-AGGCTTGGTCCTGG-CTTITACATCAGCTTA-ACTAAA CCT-ATAC-ATGCAA  
 Alte -CAA-AGGCTTGGTCCTGA-CTTITACATCAGCTTA-GCC TGG TTT-ACAC-ATGCA G  
 Plap -CAA-AGGCTTGGTCCTGA-CTTITACATCAGCTTA-GCC TAG TTT-ACAC-ATGCAA  
 Plal -CAA-AGGCTTGGTCCTGA-CTTITACATTCAGCTCAA-ACC AAA TTT-ATAC-ATGCAA  
 Sami -CAA-AGGCTTGGTCCTGA-CTTITACATTCAGCTCA-GCC AAA TTT-ATAC-ATGCAA  
 Rere -CAA-GGGCTTGGTCCTGA-CTTITACATTCAGCTCAA-ACT ACA TTT-ATAC-ATGCA  
 Gama -CAA-AGGCTTGGTCCTGA-CTTITACATCAGCTTA-ACCAGA TTT-ACAC-ATGCAA  
 Onmy -CAA-AGGCTTGGTCCTGA-CTTITACATCAGCTCTA-ACT GAA CTT-ACAC-ATGCAA  
 Sasa -CAA-AGGCTTGGTCCTGA-CTTITACATCAGCTCTA-ACT GAA CTT-ACAC-ATGCAA  
 Cola -CAA-AGGCTTGGTCCTGA-CTTITATATCAGCTTA-ACT GAA CTT-ACAC-ATGCAA  
 Dita -CAA-AGGCTTGGTCCTGA-CTTITACATCAGCTTA-ACC GGA TTT-ACAC-ATGCAA  
 Gogr -AAA-AGATTTAA TCCTAA-CCTTTCATCAGCTCTA-ACT CAA ACT-ACAC-ATGCAA  
 Chsl -CAA-AGGCCTGGTCCTGG-CTTITATGTCAGCTAGA-ACT ATA TTT-ATAC-ATGCAA  
 Atja -CAA-AGGTTTGGTCCTGA-CTTITACATCAGCTTG-ACT ATA CTT-ACAC-ATGCAA  
 lido -CAA-AGGTTTGGTCCTGA-CTTITACATCAGCTTG-ACT ATA CTT-ACAC-ATGCAA  
 Auja -CAA-AAGCTTGGTCCTGG-CTTITTA TGTCAGCTCTI-ACT AAA CTT-ACAC-ATGCAA  
 Chag -CAA-AAGCTTGGTCCTGG-CTTITAC TGTCATGT TA-ACCAGA TTT-ATAC-ATGCAA  
 Hami -TAA-AAGCTTGGTCCTGA-CTTITATATCAGCTCCC-ACT AAA TTT-ACACATGCAA  
 Saun -TAA-AAGCTTGGTCCTGA-GTITAT TGTCAGCTATI-ACT AAA TTT-ACAC-ATGCAA  
 Nema -CAA-AGGCTTGGTCCTGA-CTTITACATCAGCCCTA-ACC GAA CTT-ACAC-ATGCAA  
 Disp -CAAC-AAGCCTGGTCCTGA-CTTITGT CATCCGCC TA-ACC AAA TTT-ATAC-ATGCAA  
 Myaf -CAA-AAGCCTGGTCCTGA-CTTITAT TGTCGCCCTA-ACC AAG ATT-ATAC-ATGCAA  
 Lagu -CAA-AGATTTGGTCCTAA-TCTTTCATCAGGCCAG-GTCAGA ATT-ACAC-ATGCAA  
 Trtr -CAA-AGGCTTGGTCCTGA-CTTITACATTTGGCTTG-ATT ACA CTT-ATAC-ATGCAA  
 Zucr -CAA-AGGCTTGGTCCTGA-CTTITACATTTGGCC TCG-ATT ATA CTT-ATAC-ATGCAA  
 Pxja -CAA-AGGCTTGGTCCTGA-CTTITACATCAGCTCTA-GCT AAA CTT-ACAC-ATGCAA  
 Pxlo -CAA-AGGCTTGGTCCTGA-CTTITACATCAGCTCTA-GCT AAA CTT-ACAC-ATGCAA  
 Pctr -CAA-AGGCTTGGTCCTGA-CTTITACATCAGCTTA-ACC AAA CTT-ATAC-ATGCAA  
 Apsa -TAA-AGGCTTGGTCCTAA-CTTITAC TGTCAGCTTA-GCT AAA CTT-ACAC-ATGCAA  
 Cabe -CAA-AAA CTTGGTCCCGA-TTITAT TGTCAGCTATA-GCC AAA TTT-ACAC-ATGCAA  
 Bzze -CAA-AGGCTTGGTCCTGA-CTTITACATCAACTTA-GCT AAA TTT-ACAC-ATGCAA  
 Siim -CAA-AGGCTTGGTCCTGA-CCTTAC TGTCAACTATA-ACT GAA CTT-ACAC-ATGCAA  
 Ctru -CAA-AGGCTTGGTCCTGA-CTTITACATCAACTTA-GCC AAA TTT-ACAC-ATGCAA  
 Dpbr -CAA-AGGCTTGGTCCTGA-CTTITACATCAACTTA-GCC AAA TTT-ACAC-ATGCAA  
 Caki -CAA-AGGTTTGGTCCTAG-CTTITATATCAGCTTA-ACC TAT TTT-ACAC-ATGCAA  
 Phja -TAA-AAGTTTGA TCCTGA-CTTITACATCAGTTTA-ACC TAA TTT-ACAC-ATGCAA  
 Brsp -CAA-AAGCTTGGTCCCGG-CTTITACATCAGCTGTA-ATC TAA ATT-ACAC-ATGCAA  
 Gamo -CAA-AGGTTTGGTCCTGA-CTTITACATCAATTGTA-CCC TAA TTT-ACAC-ATGCAA  
 Lolo -CAA-AGGTTTGGTCCTGA-CTTITACATCAATTCTA-CCC CAA TTT-ACAC-ATGCAA  
 Batr -TAA-AAA CTTAGTCTTGG-TTITATATTTTTCTIACC-ACT TAA TTC-ATAC-ATGCAA  
 Prmy -TAA-AAA TTTGGTCTTAA-TTITATATCTGTITTTI-ACT AGA ATT-ATAC-ATGCAA  
 Loli TTAA-AAGTTTGGTCCTGA-CTTITAC TGTCAACTTA-GCT AGG TTT-ATAC-ATGCAA  
 Loam -TAA-AAGTTTGGTCCTGA-CTTITATATCAACTATA-GCT AAA CTT-ACAC-ATGCAA  
 Chab -CAA-AGGCTTGGTCCTGA-CTTITGCATCAGTTTA-GCC TAA TTT-ACAC-ATGCAA  
 Chto -CAA-AGGCTTGGTCCTGA-CTTITGCATCAGTTTA-GCC TAA TTT-ACAC-ATGCAA  
 Majo ACAA-AGGCTTGGTCCTGA-CTTITACATCAGCTCTA-GCT AGA TTT-ACAC-ATGCAA  
 Hlst -TAA-AAGTTTGGTCCTGG-CTTITAA TGTCAGTTTA-ACT CAA ATT-ACAC-ATGCAA

Clpe -CAA-**AAG**TTTGG**TCCTGA**-**CTT**TAC**TATCAATT**TGA-**CCC**TGCCTT-**ATAC**-**ATGC**AA  
 Mlmr -CAA-**AGG**TTTGG**TCCTGA**-**CTT**TAC**TATCAATT**TA-**GCC**CAACTT-**ATAC**-**ATGC**AA  
 Cr cr -CAA-**AGG**CTTGG**TCCTAG**-**CTT**TT**TATCATCT**CTA-**GCC**CAGATT-**ACAC**-**ATGC**AA  
 Muce -CAA-**AGG**CTTGG**TCCTAG**-**CTT**TT**TATCATCT**CTA-**GCC**CAGATT-**ACAC**-**ATGC**AA  
 Bege -CAA-**AGG**CTTGG**TCCTGA**-**CTT**TCC**TGTCAGCT**TAA-**ACT**AAA TTT-**ACAC**-**ATGC**AA  
 Mela -CAA-**AGG**CTTGG**TCCTGG**-**CTT**TT**TGTCAACT**CTA-**GCT**AGA CTT-**ACAC**-**ATGC**AA  
 Hats -CAA-**AGG**CTTGG**TCCTGA**-**CTT**TT**TGTCAGCT**TTA-**GCT**AGA TTT-**ACAC**-**ATGC**AA  
 Or la -CAA-**AAG**TTTGG**TCCTGA**-**CTT**TT**TATCAACT**CTA-**GCT**AAA CTT-**ACAC**-**ATGC**AA  
 Cosa -CAA-**GAG**TTTGG**TCCTGA**-**CTT**TT**TATCAGCT**CTA-**GCT**AAA CTT-**ACAC**-**ATGC**AA  
 Exsp -CAA-**AGG**TTTGG**TCCTGT**-**CTT**TAC**TGTCAGCT**TTA-**GCT**AAA CTT-**ACAC**-**ATGC**GA  
 Depa -CAA-**AAG**TTTGG**TCCTGA**-**CTT**TAC**TATCAATT**GTA-**GCT**AAA CTT-**ACAC**-**ATGC**AA  
 Rima -TAA-**AAG**TTTGG**TCCTGA**-**CTT**TAC**CATCAGCT**CTG-**GCT**AAA TTT-**ACAC**-**ATGC**AA  
 Fuol -CAA-**AGG**CTTGG**TCCTGA**-**CTT**TAC**TATCAGCT**TTA-**GCA**GTA TTT-**ATAC**-**ATGC**AA  
 Gmaf -CAA-**AAG**CTTGG**TCCTGA**-**CTT**TAC**TATCAGCT**TTA-**GCA**ACA CTT-**ACAC**-**ATGC**AA  
 Xee i -TAA-**AAG**CTTGG**TCCTGA**-**CTT**TT**TATCAGCT**CTA-**GCA**AAA CTT-**ACAC**-**ATGC**AA  
 Pros -CAA-**AGG**CTTGG**TCCTGA**-**CTT**TCC**TATCAACT**TTA-**ACT**AGA TTT-**ATAC**-**ATGC**AA  
 Scmi -CAA-**AGG**CTTAG**TCCTGA**-**CTT**TAC**TATCAACT**CTA-**ACT**AGA CTT-**ACAC**-**ATGC**AA  
 Rolo -CAA-**AGG**CTTGG**TCCTGA**-**CTT**TGC**TGTCGACT**TTA-**ACC**GGA CTT-**ACAC**-**ATGC**AA  
 Cere -CAA-**AAG**CTTGG**TCCTGG**-**CTT**TAC**TATCAGCT**CTA-**ACC**AAA CTT-**ACAC**-**ATGC**AA  
 Daga -CGA-**AGG**CTTGG**TCCTGA**-**CTT**CAC**TATCAACT**TTA-**ACT**AAA CTT-**ATAC**-**ATGC**AA  
 Anco -CAA-**AGG**CTTGG**TCCTGG**-**CTT**TAC**TATCAACT**TTT-**ACT**AAA CTT-**ACAC**-**ATGC**AA  
 Dmve -CAA-**AGG**ATTAG**TCCTAA**-**CTT**TAG**TATCACCT**TTT-**ACT**GGA TTT-**ACAC**-**ATGC**AA  
 Dmar -CAA-**AGG**ATTAG**TCCTAA**-**CTT**TAG**TATCACCT**TTT-**ACT**GGA TTT-**ACAC**-**ATGC**AA  
 Anka -CAA-**AGG**CTTGG**TCCTGG**-**CTT**TAC**TATCAACT**CTT-**ACC**AAA CTT-**ACAC**-**ATGC**AA  
 Moja -CAA-**AGG**CTTGG**TCCTGG**-**CTT**TAC**TATCAACT**TTT-**ACC**AAA CTT-**ACAC**-**ATGC**AA  
 Hoja -CAA-**AGG**CTTGG**TCCTGG**-**CTT**TAC**TATCAACT**TTT-**ACC**AAA CTT-**ACAC**-**ATGC**AA  
 Bede -CAA-**AGG**CTTGG**TCCTGA**-**CTT**TAC**TATCGACT**TTA-**ACT**AGA TTT-**ACAC**-**ATGC**AA  
 Bosp -CAA-**AGG**CTTGG**TCCTGA**-**CTT**TAC**TATCGACT**TTA-**ACT**AGA TTT-**ACAC**-**ATGC**AA  
 Mysp -CAA-**AGG**CTTGG**TCCTGA**-**CTT**TAC**TATCAGCT**TTA-**GCT**AAA CTT-**ACAC**-**ATGC**AA  
 Osja -CAA-**AGG**CTTGG**TCCTGA**-**CTT**TAC**TATCAACT**TTT**AGCC**AAA CTT-**ACAC**-**ATGC**AA  
 Sgro -CAA-**AGG**CTTGG**TCCTGA**-**CTT**TAC**TATCAGCT**TTA-**GCC**AAA CTT-**ACAC**-**ATGC**AA  
 Pzpa -CAA-**AGG**CTTGG**TCCTGA**-**CTT**TT**TATCAGCT**CTA-**GCC**AAA TTT-**ACAC**-**ATGC**AA  
 Zeja -CAA-**AGG**CTTGG**TCCTGA**-**CTT**TT**TATCAGCT**TTA-**ACC**AAA TTT-**ATAC**-**ATGC**AA  
 Zne -CAA-**AGG**CTTGG**TCCTGG**-**CTT**TT**TGTCAGCT**CTA-**ACC**AAA TTC-**ATAC**-**ATGC**AA  
 Zefa -CAA-**AGG**CTTGG**TCCTGG**-**CTT**TT**TGTCAGCT**CTA-**ACT**AAA TTT-**ATAC**-**ATGC**AA  
 Acni -CAA-**AGG**CTTGG**TCCTGA**-**CTT**TT**TATCAGCT**TTA-**ACC**AAA TTT-**ACAC**-**ATGC**AA  
 Ncrh -CAA-**AGG**CTTGG**TCCTGA**-**CTT**TT**TATCAGCT**TTA-**ACC**AAA TTT-**ACAC**-**ATGC**AA  
 Agca -CAA-**AGG**CTTGG**TCCTGA**-**CTT**TAC**TATCAATT**ATA-**GCT**AAA CTT-**ACAC**-**ATGC**AA  
 Hydy -CAA-**AGG**CTTGG**TCCTGA**-**CTT**TGC**TGTCAACT**TTA-**GCT**CAA CTT-**ACAC**-**ATGC**AA  
 Gsac -CAA-**AGG**CTTGG**TCCTGA**-**CTT**TGA**CATCAACT**TTA-**GCC**AAA CTT-**ACAC**-**ATGC**AA  
 Pevo -CAA-**AGG**CTTGG**TCCTGA**-**CTT**TT**TGTCAGCT**TTG-**GCT**AGA CTT-**ACAC**-**ATGC**GA  
 Hiku -CAA-**AGG**CTTGG**TCCTAG**-**CTT**TAC**TATTATT**ATA-**ACC**AAA CTT-**ACAC**-**ATGC**AA  
 Inpa -CAC-**AGG**TTTGG**TCCTGG**-**CTT**TT**TATCAATT**CTA-**GCC**GAG CTT-**ATAC**-**ATGC**AA  
 Auch -TAA-**AGG**CTAGG**TCCTGG**-**CCT**TGC**AATCAGCC**TAG-**GCT**ACA CTT-**ACAC**-**ATGC**AA  
 Fico -CAA-**AGG**CTTGG**TCCTGA**-**CTT**TAC**TATCAACT**CTG-**ACT**AAA CTT-**ACAC**-**ATGC**AA  
 Macs -CAA-**AGG**CTTGG**TCCTGA**-**CTT**TGC**TGTCAACT**CTA-**GCT**GTA CTT-**ACAC**-**ATGC**AA  
 Moal -CAA-**AGG**TTTGG**TCCTGG**-**CTT**TAT**CATCAACT**ATA-**ACT**AAA CTT-**ACAC**-**ATGC**AA  
 Syma -CAA-**AGG**TTTGG**TCCTAG**-**CTT**TGT**TATCAGCT**ATA-**CCT**GGA CTT-**ATAC**-**ATGC**AA  
 Maf r -CAA-**AGG**TTTGG**TCCTGA**-**CTT**TT**TGTCAACT**CTA-**ACT**AAA CTT-**ACAC**-**ATGC**AA  
 Dcpe -CAT-**AAG**CTTAG**TCCTAA**-**CTT**TGC**TATCGATT**CTG-**GCT**AGA TTT-**ACAC**-**ATGC**AA  
 Dct i -CAT-**AAG**CTTAG**TCCTAA**-**CTT**TGC**TATCGATT**TTG-**GCT**AAA TTT-**ACAC**-**ATGC**AA  
 Hehi -CAA-**AGG**CTTGG**TCCTGA**-**CTT**TAC**TATCAACT**TTA-**GCC**AAA TTT-**ACAC**-**ATGC**AA

Stam -CAA-**AGG**CTTGG**TCCTGA**-**CTT**TAC**TGTCAACT**TA-**GCT**AAA TTT -**ACAC**-**ATGC**AA  
 Hogi -CAA-**AGG**CTTGG**TCCTGA**-**CTT**TAC**TATCAGCT**TA-**GCC**AAA TTT -**ACAC**-**ATGC**AA  
 Erzo -CAA-**AGG**CTTGG**TCCTGA**-**CTT**TAC**TATCAACT**TA-**GCC**AAA CTT -**ACAC**-**ATGC**AA  
 Hxot -CAA-**AGG**CTTGG**TCCTGA**-**CTT**TAC**TATCAACT**TA-**GCC**AAA CTT -**ACAC**-**ATGC**AA  
 Core -CAA-**AGG**CTTGG**TCCTGA**-**CTT**TAT**TATCAACT**TA-**GCC**AAA CTT -**ACAC**-**ATGC**AA  
 Apve -CAA-**AGG**CTTGG**TCCTGA**-**CTT**TAC**TATCAACT**TA-**GAC**AAA TTT -**ACAC**-**ATGC**AA  
 Latj -CAA-**AGG**CTTGG**TCCTAA**-**CTT**TAC**TGTCAGCT**CTA-**GCT**AGA TTT -**ACAC**-**ATGC**AA  
 Laja -CAA-**AAG**CTTGG**TCCTGA**-**CTT**TAC**TATCAACT**CTA-**GCT**AAA CTT -**ACAC**-**ATGC**AA  
 Syja -CAA-**AAG**TTTGG**TCCTGA**-**CTT**TAG**TATCAACT**TA-**GCT**AGA CTT -**ACAC**-**ATGC**AA  
 Epme -CAA-**AGG**CTTGG**TCCTGA**-**CTT**TCC**TATCAGCT**TA-**ACC**AAA TTT -**ACAC**-**ATGC**GA  
 Grse -CAA-**AGG**CTTGG**TCCTGA**-**CTT**TTC**TATCAACT**CTA-**ACT**AGA CTT -**ACAC**-**ATGC**AA  
 Clja -CAG-**AAG**CTTGG**TCCTAG**-**CTT**TAT**TAACAGCT**CTA-**GCT**AAA CTT -**ACAC**-**ATGC**AA  
 Ogcy -TAA-**AAA**TTTGG**TCCTGA**-**TTT**TAC**TGTCGGCT**TA-**GCC**AGA TTT -**ACAC**-**ATGC**AA  
 Plna -CAA-**AAG**CTTGG**TCCTGG**-**CTT**TTC**TATTAGCT**CTA-**GCT**AAA CTT -**ACAC**-**ATGC**AA  
 Lema -CAA-**AGG**CTTGG**TCCTGA**-**CTT**TAT**TATCAACT**TA-**GCC**AAA CTT -**ACAC**-**ATGC**AA  
 Etzo -CAA-**AGG**CTTGG**TCCTGA**-**CTT**TAC**TATCAACT**CTA-**GCT**AAA CTT -**ACAC**-**ATGC**AA  
 Apse -CAA-**AGG**CTTGG**TCCTGA**-**CTT**TAC**TGTCAACT**GTA-**GCT**AAA CTT -**ACAC**-**ATGC**AA  
 Epde -CAA-**AGG**CTTGG**TCCTGA**-**CTT**TAC**TATCAACT**TA-**GCT**AAA CTT -**ACAC**-**ATGC**AA  
 Slja -CAA-**AGG**CTTGG**TCCTGG**-**CTT**TAC**TATCAGCT**CTA-**GCT**AAA CTT -**ACAC**-**ATGC**AA  
 Bsja -TAA-**AGG**CTTGG**TCCTGA**-**CTT**TAC**TAACAGCT**TC-**TCCT**AA CTT -**ACAC**-**ATGC**AA  
 EcnA -CAA-**AGG**CTTGG**TCCTGA**-**CTT**TAC**TGTCAGCT**TA-**GCC**ATA TTT -**ACAC**-**ATGC**AA  
 Cohi -CAA-**AGG**TTTGG**TCCTGG**-**CTT**TAC**TGTCAGCT**TA-**GTT**AAA CTTT**ACAC**-**ATGC**AA  
 Caar -CAA-**AGG**TTTGG**TCCTGA**-**CTT**TAC**TGTCAGCT**TA-**GCT**AGA TTT -**ACAC**-**ATGC**AA  
 Came -CAA-**AGG**TTTGG**TCCTGA**-**CTT**TAC**TGTCAGCT**TA-**GCT**AGA TTT -**ACAC**-**ATGC**AA  
 Mema -CAA-**AGG**CTTGG**TCCTGA**-**CTT**TAC**TATCAGCT**TA-**GCC**AAA CTT -**ACAC**-**ATGC**AA  
 Lenu -CAA-**AGG**TTTGG**TCCTGA**-**CCT**TAC**TGTCAACT**CTA-**GCT**AAA ACT -**ATAC**-**ATGC**AA  
 Plma -TAA-**AGG**CTTGG**TCCTGA**-**CTT**TAC**TATCAACT**CTA-**GCT**AAA CTT -**ACAC**-**ATGC**AA  
 Emst -CAA-**AGG**TTTGG**TCCTGA**-**CTT**TAC**CATCAACT**TA-**GCT**AAA CTT -**ACAC**-**ATGC**AA  
 Ptti -CAA-**AGG**TTTGG**TCCTGA**-**CTT**TAC**TATCAACT**TA-**GCT**AAA CTT -**ACAC**-**ATGC**AA  
 Losu -CAA-**AGG**TTTGG**TCCTGG**-**CCT**TAC**TAACAGCT**CTA-**ACC**AAA TTT -**ACAC**-**ATGC**AA  
 Geoy -CAA-**AAG**CTTGG**TCCTGG**-**CTT**TGT**TGTCAGCT**TA-**ACT**TAA TTT -**ACAC**-**ATGC**AA  
 Dipi -CAA-**AGG**TTTGG**TCCTGA**-**CTT**TAT**TATCAACT**TA-**GCT**AAA CTT -**ACAC**-**ATGC**AA  
 Pama -CAA-**AGG**TTTGG**TCCTGA**-**CTT**TTC**TACCAGCT**TA-**GCT**AGA CTT -**ACAC**-**ATGC**AA  
 Leob -CAA-**AGG**TTTGG**TCCTGA**-**CTT**TCC**TGTCAGCT**TA-**ACT**CAA CTT -**ACAC**-**ATGC**AA  
 Neba -CAA-**AAG**TTTGG**TCCTGA**-**CTT**TAT**TGTCAGCT**TA-**GCT**AGA TTT -**ATAC**-**ATGC**AA  
 Pdpi -CAA-**AGG**CTTGG**TCCTGA**-**CTT**TAC**TGTCAGCT**TA-**GCT**TGA CTT -**ACAC**-**ATGC**AA  
 Nimi -CAA-**AAG**CTTGG**TCCTGA**-**CTT**TAC**TATCAACT**TA-**GCT**ATA TTT -**ACAC**-**ATGC**AA  
 Uptr -CAA-**AGG**CTTGG**TCCTGA**-**CTT**TAC**TATCAGCT**CTA-**GCT**AGA TTT -**ACAC**-**ATGC**AA  
 Pesc -CAA-**AAG**CCTGG**TCCTGA**-**CTT**TAT**TGTCAGCT**ATT-**ACT**AAA CTT -**ACAC**-**ATGC**AA  
 Baar -TAA-**AAG**TTTAG**TCCTGG**-**CTT**TAC**TGTCAGCT**TA-**GCC**GAA ACT -**ACAC**-**ATGC**AA  
 Moar -CAA-**AGG**TTTGG**TCCTGA**-**CTT**TAC**TATCAACT**TA-**GCT**AAA CTT -**ACAC**-**ATGC**AA  
 Toja -CAA-**AGG**TTTAG**TCCTGA**-**CTT**TAC**TATCAGCC**CTA-**GCC**TAA TTT -**ACAC**-**ATGC**AA  
 Chau -CAA-**AGG**TTTGG**TCCTGA**-**CTT**TAC**TGTCAGCT**ATA-**GCT**AAA TTT -**ACAC**-**ATGC**AA  
 Chse -CAA-**AGG**TTTGG**TCCTGG**-**CCT**TCC**TAACAACCT**ATA-**GCT**AAA CTT -**ACAC**-**ATGC**AA  
 Enar -CAA-**AAG**CTTGG**TCCTGA**-**CTT**TAC**TATCAACT**TA-**GCT**AGA CTT -**ACAC**-**ATGC**AA  
 Hpty -CAA-**AAG**CTTGG**TCCTGA**-**CTT**TAC**TATCAACT**TA-**GCT**AAA CTT -**ACAC**-**ATGC**AA  
 Nana -CAA-**AAG**CTTGG**TCCTGG**-**CTT**TGA**CCTCAGCT**CTA-**GCC**AAA TTT -**ACAC**-**ATGC**AA  
 Mcst -CAA-**AGG**CTTGG**TCCTGA**-**CTT**TAC**TATCAGCT**CTA-**ACC**AAA CTT -**ACAC**-**ATGC**AA  
 Rhox -CAA-**AGG**CTTGG**TCCTGA**-**CTT**TAC**TATCAACT**CTA-**GCT**AAA CTT -**ACAC**-**ATGC**AA  
 Opfa -CAA-**AGG**CTTGG**TCCTGA**-**CTT**TAC**TATCAGCT**CTA-**GCC**AAA CTT -**ACAC**-**ATGC**AA  
 Paar -CAA-**AGG**TTTGG**TCCTGG**-**CCT**TGC**TCTCAACT**TTI-**ACT**AAA CTT -**ACAC**-**ATGC**AA  
 Gozo -CAA-**AGG**CTTGG**TCCTGA**-**CTT**TAT**TATCAGCT**TA-**GCT**AGA CTT -**ACAC**-**ATGC**AA

Ackr -CAA-AGGCTTGGTCCTGA-CCTTGCATCAACTTTA-GCTATGCTT-ACAC-ATGCAA  
 Elev -CAA-AGGCTTGGTCCTGA-CTTTACATCAACTTTA-GCTAAAATT-ACAC-ATGCAA  
 Trdu -CAA-AGGCTTGGTCCTGA-CTTTACATGTCAGCTTTG-GCTAAACTT-ACAC-ATGCAA  
 Amoc -TAA-AGGCTTGGTCCTGA-CTTTACATGTCAGCTCTG-GCTAAACTT-ACAC-ATGCAA  
 Hame -CAA-AGGCTTGGTCCTGA-CTTTGCATCAACTTTA-ACTAGATTT-ACAC-ATGCAA  
 Chso -CAA-AGGTTTGGTCCCGGCTT-ATCTCAACTGTA-GCTGAACTT-ACAC-ATGCAA  
 Lyto -CAA-AGGCTTGGTCCTGA-CTTTACATCAACTTTA-GCTAAACTT-ACAC-ATGCAA  
 Encr -CAA-AGGCTTGGTCCTGA-CTTTACATCACCTTTA-GCTAAACTT-ACAC-ATGCAA  
 Bvar -CAA-AGGCCTGGTCCTGA-CTTTATATATCAGCTTCA-GCCAAACTT-ACAC-ATGCAA  
 Noco -CAA-AGGCTTGGTCCTGA-CTTTATCATCAGCTTCA-GCCGAACTT-ACAC-ATGCAA  
 Chsp -CAA-AGGTTTGGTCCCGG-CTTTATAGTCACCTTTG-GCCCAACTT-ACAC-ATGCAA  
 Arja -CAA-AGGCTTGGTCCTGA-CTTTATATCAACTTTA-GCCAAATTT-ACAC-ATGCAA  
 Pase -CAA-AGGTTTGGTCCTGG-CTTTCTATCTGCTGTA-ACTAGACAT-ACAC-ATGCAA  
 Trel -CAA-AGGCTTGGTCCTGA-CTTTTCCTCAGCTTTG-GCTAAGTTT-ACAC-ATGCAA  
 Lifa -TAA-AGGCTTAGTCCTGG-CTTTACATGTCAGCTTTA-GTCAACTT-ACAC-ATGCAA  
 Acur -CAA-AGGCTTGGTCCTCG-CTTTCCATCAGCTGGC-ACTAATATT-ACAC-ATGCAA  
 Ampe -CAA-AGGCTTGGTCCTGA-CTTTACATCAACTTTA-GCTAAACTT-ACAC-ATGCAA  
 Urja -CAA-AGGCTTGGTCCTGA-CCTTGCATCATCTTTA-GCCAGACTT-ACAC-ATGCAA  
 Enet -CAT-AGGCTTGGTCCTGA-CTTTCCATCAGCTTTA-GCTTAATTT-ACAC-ATGCAA  
 Ptbr -CAA-AGGCTTGGTCCTGA-CCTTGTGTCAACTTTA-GCTTAATTT-ACAC-ATGCAA  
 Safa -CAA-AGGCTTGGTCCTGA-CTTTACATGTCAACTCTG-GCTAGATTT-ACAC-ATGCAA  
 Icae -CAA-AGGCTTGGTCCTGA-CTTTACATGTCAACTCTA-ACTAAACTT-ACAC-ATGCAA  
 Asmi -AAG-AAACTTGGTCCTGA-TTTTATGTCCTTCTCTAGCTTCAACTT-ACAC-ATGCAA  
 Foal -CAA-AGGCTTGGTCCTGA-CTTTATATCAGTATTA-GCTGAGTTT-ATAC-ATGCAA  
 Drze -CAA-AGGTTTGGTCCTAG-CTTTAAATCAGTTTAA-ACTAAACTT-ACAC-ATGCAA  
 Rhas -CAA-AGGCTTGGTCCTGA-CTTTACATCAGCTCTG-GCCAGACTT-ACAC-ATGCAA  
 Elac -CAA-AGGCTTGGTCCTGA-CTTTACATCAGCTTTG-GCCAAATTT-ACAC-ATGCAA  
 Kugu -CAA-AGGCTTGGTCCTGA-CTTTACATCAGCTTTA-GCCAAACTT-ACAC-ATGCAA  
 Plor -CAA-AGGCTTGGTCCTGA-CTTTACATCAACTCTA-GCCAAACTT-ACAC-ATGCAA  
 Sgun -CAA-AGGTTTGGTCCTGA-CTTTGCATCAGCTTTA-GCTAAGCTT-ACAC-ATGCAA  
 Zaco -CAA-AGGTTTGGTCCTGA-CTTTACATACAACTCCA-GCTAGATTT-ACAC-ATGCAA  
 Zbfl -CAA-AGGTTTGGTCCTGA-CTTTACATACAACTTTA-TCTAAACTT-ACAC-ATGCAA  
 Spba -CAA-AGGCTTGGTCCTGA-CTTTACATGTCAGCTTTG-ACTAGATTT-ACAC-ATGCAA  
 Game -CAA-AGGCTTGGTCCTGA-CTTTACATGTCAACTCTA-ACTAGACTT-ACAC-ATGCAA  
 Thth -CAA-AGGCTTGGTCCTGA-CTTTACATGTCAACTCTA-GCTAAACTT-ACAC-ATGCAA  
 Xigl -CAA-AGGCTTGGTCCTGA-CTTTACATGTCAGCTTTA-GCTAATCTT-ACAC-ATGCAA  
 Hyja -CAA-AGGCTTGGTCCTGA-CTTTTCATGTCAGCTTTA-GCTAGATTT-ATAC-ATGCAA  
 Psan -GAA-AGGCTTGGTCCTGA-CTTTTCATGTCAGCTTTA-GCTAGATTT-ATAC-ATGCAA  
 Cupa -CAA-AGGCTTGGTCCTGA-CTTTACATGTCAACTCTA-GCTAAACTT-ACAC-ATGCAA  
 Mpch -CAA-AGGCTTGGTCCTGA-CTTTATATCAGCTACA-ACTAAACTT-ACAC-ATGCAA  
 Char -CAA-AGGTTTGGTCCTGA-CTTTACATCAGCTGTA-GCCCAACTT-ACAC-ATGCAA  
 Pser -CAA-AGGTTTGGTCCCGG-CTTTACATGTCAACTGTA-GCTAAACTT-ACAC-ATGCAA  
 Prol -CAA-AGGCTTGGTCCTGA-CTTTACATGTCGACTCTA-ACTAGACTT-ACAC-ATGCAA  
 Plbi -CAA-AGGCTTGGTCCTGA-CTTTACATGTCGACTTTA-ACTAAACTT-ACAC-ATGCAA  
 Calu -CAA-AGGCTTGGTCCTGG-CCTTACATGTCGGCTGTA-ACTCAATTT-ACAC-ATGCAA  
 Papa -CAA-AGGTTTGGTCCTGA-CTTTACATCAGCTCTA-GCAGTCTT-ACAC-ATGCAA  
 Suf r -CAA-AGGCTTGGTCCTGA-CTTTTCATGTCAACTCTA-ACCTAATCTT-ACAC-ATGCAA  
 Stci -CAA-AGGCTTGGTCCTGA-CTTTTCATCAACTCTA-ACCTAATCTT-ACAC-ATGCAA  
 Taru -CAA-AGGCTTGGTCCTGA-CTTTACATACAACTCTG-ATCAAACTT-ACAC-ATGCAA  
 Rala -CAA-AGGCTTGGTCCTGA-CTTTACATACAACTCTA-GCTTAATCTT-ACAC-ATGCAA

\*\* \* \* \* \*



|      | 7  | 7'     | 8         | 9     | ;   | HVR   | ;      | 10   | ;   | HVR        | ;    | 10' |      |
|------|----|--------|-----------|-------|-----|-------|--------|------|-----|------------|------|-----|------|
| Scca | GT | TTCAGC | CCCCCTGTC | AG--- | AAT | GCCCT | AAGT   | ---- | ATT | CTATTA     | ---- | AAT | AATT |
| Muma | GT | TTCAGC | CCTCCTGTC | AG--- | AAT | GCCCT | AATT   | ---- | AAT | CTATTA     | ---- | AAT | AATT |
| Erca | GT | ATCCGC | ACTCCGTC  | AA--- | AAT | GCCCT | TAATC  | ---- | TTC | CTAGAA     | ---- | GAA | GACA |
| Pose | GT | ATCCGC | GCTCCGTC  | AA--- | AAT | GCCCT | TAATC  | ---- | TTC | CTAGTA     | ---- | GAA | GACG |
| Actr | GT | CTCCGC | ACCCCTGTC | AG--- | AAT | GCCCT | TAATC  | ---- | CCC | CTGCCACATA | ---- | GCG | GAAA |
| Scal | GT | CTCCGC | ACCCCTGTC | AG--- | AAT | GCCCT | TAATC  | ---- | CCC | CAACCACATA | ---- | GCG | GAAA |
| Posp | GT | CTCCGC | ACCCCTGTC | AG--- | AAT | GCCCT | TAATC  | ---- | CCC | CACCACATA  | ---- | GCG | GAAA |
| Atsp | GT | ATCCGC | ACCCCTGTC | AG--- | AAT | GCCCT | TAAAC  | ---- | CCC | AACCA      | ---- | GGA | GATA |
| Leoc | GT | ATCCGC | ACCCCTGTC | AG--- | AAT | GCCCT | TCAAAC | ---- | CCT | AAGCA      | ---- | GGA | GATA |
| Amca | GT | ATCCGC | CCCCCTGTC | AG--- | GAT | GCCCT | TAACCT | ---- | CCC | CCCAC      | ---- | GGA | GATA |
| Osbi | GT | GTCCGC | GCCCCGTC  | AG--- | AAT | GCCCT | CACT   | ---- | GCC | TAGC       | ---- | GTT | TTAG |
| Pabu | GT | ATCCGC | ACCCCAGTC | AG--- | AAT | GCCCT | CAAAC  | ---- | CTA | AA         | ---- | GGA | CTAG |
| Hial | GT | ATCCGC | ACCCCTGTC | AG--- | GAT | GCCCT | CGATC  | ---- | CCC | CCTCC      | ---- | GGA | GACG |
| Elha | GT | CTCCGC | ACCCCTGTC | AG--- | GAT | GCCCT | CGATC  | ---- | CTC | TAAT       | ---- | GAC | GACG |
| Mlcy | GT | CTCAGC | AAACCCGTC | AG--- | AAT | GCCCT | CAATC  | ---- | CCC | TACT       | ---- | GGA | GACG |
| Algl | GT | TTCCGC | GTCCCGTC  | AG--- | AAT | GCCCT | TGGTC  | ---- | CCC | CTCAG      | ---- | GCG | GACG |
| Ptgi | GT | CTCCGC | ACACCCGTC | AG--- | GAT | GCCCT | TGATCC | ---- | CCC | AATT       | ---- | GCG | GACG |
| Alaf | GT | ATCCGC | ACCCCGTC  | AG--- | AAT | GCCCT | TGAT   | ---- | CTT | CCTCC      | ---- | GAC | GACA |
| Nock | GC | CTCCAC | GCCCCAGTC | AG--- | AAT | GCCCT | TGTT   | ---- | CCC | CTTAT      | ---- | GCG | GACA |
| Anja | GT | ACCCGC | GCACCCGTC | AG--- | AAT | GCCCT | ATATC  | ---- | CCC | TCCC       | ---- | GCG | GAAA |
| Gyki | GT | ACCCGC | ACCCCTGTC | AG--- | AAT | GCCCT | TTCCC  | ---- | CCC | GGCA       | ---- | GGA | AAAA |
| Syka | GT | ATCCGC | ACCCTGTC  | AG--- | AAT | GCCCT | TCATC  | ---- | CCC | CTCCC      | ---- | GCG | GAGA |
| Opma | GT | ACCCGC | ACCCCTGTC | AG--- | AAT | GCCCT | TCATCC | ---- | CCC | ACGCC      | ---- | GCG | GAAA |
| Comy | GT | ACCCGC | ACCCCTGTC | AG--- | AAT | GCCCT | CTTTC  | ---- | CTC | TAAT       | ---- | GAA | GAAG |
| Sasp | GT | ACCCGC | ACACCCGTC | AG--- | AAT | GCCCT | GAACC  | ---- | CTC | TCTAT      | ---- | GAC | GAAC |
| Eupe | GT | ATCTGC | ACACCCGTC | AG--- | AAT | GCCCT | ACGCC  | ---- | CCT | TACTTAT    | ---- | AGG | GATT |
| Enja | GT | CTCCGC | AGTCCGTC  | AG--- | GAT | GCCCT | CAACT  | ---- | TCC | CACCC      | ---- | GGA | AATA |
| Same | GC | CTCCGC | ACCCCTGTC | AG--- | GAT | GCCCT | CAATC  | ---- | CCC | CGTCC      | ---- | GCG | GACG |
| Chch | GT | ATCCGC | ACCCCTGTC | AG--- | AAT | GCCCT | CATTC  | ---- | CCC | CGCCC      | ---- | GCG | GACG |
| Grgr | GT | ATCCGC | ACCCCTGTC | AG--- | GAT | GCCCT | CGGTG  | ---- | CTC | CATCC      | ---- | GAC | AACG |
| Caau | GT | CTCCGC | ACCCCAGTC | AA--- | TAT | GCCCT | CAATCC | ---- | CCC | TACCC      | ---- | GCG | GACG |
| Cyca | GT | CTCCGC | AACCCAGTC | AA--- | TAT | GCCCT | CAATCC | ---- | CCC | CACCC      | ---- | GCG | GACG |
| Dare | GT | CTCCGC | ACCCCTGTC | AA--- | TAC | GCCCT | CAATCC | ---- | CCA | AACCT      | ---- | GCG | GACG |
| Cost | GT | CTCCGC | AAACCCGTC | AG--- | AAT | GCCCT | CAATCC | ---- | CCC | GCCC       | ---- | GCG | GACG |
| Leec | GT | ATCCGC | AGCCCTGTC | AG--- | GAT | GCCCT | TAATC  | ---- | CCC | AGCCC      | ---- | GAC | GACG |
| CrIa | GT | CTCCGC | AGCCCGTC  | AG--- | GAT | GCCCT | TAAT   | ---- | CCC | TGCC       | ---- | GCG | GACG |
| Clmc | GT | ATCCGC | ACCCCTGTC | AG--- | AAT | GCCCT | CAATC  | ---- | CTC | CACCC      | ---- | GAC | AACG |
| Phin | GT | ATCCGC | ACCCCTGTC | AG--- | AAT | GCCCT | CAGC   | ---- | CTC | CCCCCA     | ---- | GAC | C-CG |
| Icpu | GT | CTCCGC | ACCCCTGTC | AG--- | AAT | GCCCT | CAATC  | ---- | CCC | TGCC       | ---- | GCG | GACG |
| Psto | GT | ATCCGC | ATCCCTGTC | AG--- | AAT | GCCCT | CAATC  | ---- | CTC | TGCC       | ---- | GAC | AACG |
| Cora | GT | ATCCGC | ACCCCTGTC | AG--- | AAT | GCCCT | CAATCC | ---- | CCC | TCCC       | ---- | GCG | GACG |
| Eisp | GT | ATCAGC | ACCCCAGTC | AG--- | AAT | GCCCT | CAATC  | ---- | CCC | CGTCC      | ---- | GAC | GATG |
| Apal | GT | ATCCGC | ACCCCTGTC | AG--- | AAT | GCCCT | CAATT  | ---- | CCC | CATCC      | ---- | GCG | AGCG |
| EsLu | GT | CTCCGC | ACCCCTGTC | AG--- | GAT | GCCCT | TAATC  | ---- | CCC | TGCC       | ---- | GCG | GCTG |
| Dape | GT | CTCCGC | ACTCCTGTC | AG--- | AAT | GCCCT | TAATC  | ---- | CCC | TGCC       | ---- | GCG | GCTG |
| Glse | GT | CTCCGC | ACCCCTGTC | AG--- | AAT | GCCCT | TAATC  | ---- | CCC | CGCCC      | ---- | GCG | GACG |
| Naar | GT | CTCCGC | CCCCCTGTC | AG--- | GAT | GCCCT | TAATC  | ---- | CCC | TGCC       | ---- | GCG | GACG |
| Baoc | GT | CTCCGC | CCCCCTGTC | AG--- | GAT | GCCCT | TAATC  | ---- | CCC | CGCCC      | ---- | GAC | GACG |
| Opso | GT | CTCCGC | ATCCCTGTC | AG--- | AAT | GCCCT | TAATC  | ---- | CCC | CGCCC      | ---- | GCG | GGTG |
| Alte | GT | CTCCGC | ACCCCTGTC | AG--- | AAT | GCCCT | TAATC  | ---- | CCC | TGTC       | ---- | GCG | GACG |
| Plap | GT | CTCCGC | ACCCCTGTC | AG--- | AAT | GCCCT | TAATC  | ---- | CCC | CACCC      | ---- | GCG | GACG |

Plal GTCTCCGCACCCCGTGTAG---GATGCCCTTACC---CCCTGCC-----GGGGCA  
 Sami GTCTCCGCGTCCCTGTGTAG---GATGCCCTTACC---CCCGCCC-----GGGGCA  
 Rere GTCTCCGCAGGGGTGTGTAG---GATGCCCTTGGCC---CCGCCCC-----GGGGCA  
 Gama GTCTCCGCACCCCTGTGTAG---GATGCCCTTAATC---CCCGGCC-----GGGATG  
 Onmy GTCTCCGCATTCTGTGTAG---GATGCCCTTAAT-----CCCTGCC-----GGGACG  
 Sasa GTCTCCGCATTCTGTGTAG---GATGCCCTTAAT-----CCCTGCC-----GGGACG  
 Cola GTCTCCGCACTCCTGTGTAG---GATGCCCTTAATC---CCCTGCC-----GGGACG  
 Dita GTTTCCGCACCCCGTGTAG---GATGCCCTCAATT---TCCACCC-----GGAACG  
 Gogr GCCTCCGCCCCCAGTGTAG---AATGCCCTTAATC---CCCTAACCT-----GGGATC-  
 Chsl GTCTCCGCGACCCTGTGTAG---AATGCCCTTACC---CTCCTTG-----GACGA-G  
 Atja GTATCCGCACCCCTATGTAG---AATGCCCTTAACT---TCCAGGACT-----AGAAGAA  
 lido GTATCCGCACCCCTATGTAG---AATGCCCTTAACT---TCCAGGACT-----GGAAGAA  
 Auja GCCTCTACAACCCCGTGTAG---AATGCCCTCAATC---TCCCGCCCG-----GACA-CG  
 Chag GTTTCCGCACCCCTGTGTAG---GATGCCCTCAAAC---TTCAGCC-----GAAACG  
 Hami GCATCCACCCCCGTGTAG---AATGCCCTCGATC---CCCTATTT-----GGAACG  
 Saun GCATCTACCCCCGTGTAG---AATGCCCTCGATC---CCTAATT-----GGAACG  
 Nema GTATCCGCACCCCGTGTAG---AATGCCCTCAAACC---CCGCC-----GGGAATG  
 Disp GTATCCGCACCCCGTGTAG---AATGCCCTAAAA---TCCATCC-----GGAACG  
 Myaf GTATCCGCACCCCGTGTAG---AATGCCCTCAAAA---TCCCGCC-----AGAACG  
 Lagu GCCTCGGCCCCCGTGTAG---AATGCCCTCAACT---TCCATCC-----GAAAAA  
 Trtr GTATCCGCGCCCTGTGTAG---AATGCCCTCAAC-----CCCTACC-----GGGCTA  
 Zucr GTATCTGACCCCTGTGTAG---AATGCCCTCAAC-----CCCGACC-----GGGCTA  
 Pxja GTATCCGCGCCCTGTGTAG---AATGCCCTCAGTT---ACCTGCC-----GGAACA  
 Pxlo GTATCCGACCCCTGTGTAG---AATGCCCTCAGTT---ACCTGCC-----GGAACA  
 Pctr GTATCCGCGCCCGTGTAG---AATGCCCTCAGCT---TCCATGCC-----GGAAGCA  
 Apsa GTATCCGCGCCCGTGTAG---AATGCCCTCAACT---TCCAGCC-----GGAACA  
 Cabe GTATCCGCGCCCTGTGTAG---AATGCCCTCATCT---CCCGCC-----GGAAGAG  
 Bzze GTCTCCGCTCCCGTGTAG---AATGCCCTCATCT---TCCCGAC-----GGAACAG  
 Siim GTCTCCGACCCCTGTGTAG---AATGCCCTCATAT---TCCATGCC-----GGAAGAG  
 Ctru GTATCCGACCCCGTGTAG---AATGCCCTCACCT---CCCGTCC-----GGGAAAG  
 Dpbr GTATCCAGCCCCAGTGTAG---AATGCCCTCACCT---CCCGCTCC-----GGGAAAG  
 Caki GTCTCCGACCCCTGTGTAG---AATGCCCTTATTGT---CCTGCCA-----GGAACTA  
 Phja GTCTCTGATTCCAAGTAA---AATGCCCTCGGTTA---CCCTAATCC-----GGGACTG  
 Brsp GTCTCCGACCCCTGTGTAA---GAAAGGCCCTCAGCCC---CCCAACCG-----GAGGCC  
 Gamo GTCTCCGCTCCCGTGTAG---AATGCCCTTAATG---TCCATGCC-----GGAATTA  
 Lolo GTCTCCGATCCCGTGTAG---AATGCCCTTAATG---TCCATGCC-----GGAATTA  
 Batr GACTCATCACCCAGTGTAG---GCAAGGCCATGACCC---TTTGCTTA-----AAAGGCA  
 Prmy GCCTCCACAACCCTGTGTAG---AATGCCCTTAC---TCTATTT-----GGAACAA  
 Loli GTCTCCGACCCCTGTGAATC---ATGCCCTATGCAT---CTCCTCTA-----GAGAGCA  
 Loam GTCTCCAGCCCCGTGTGAAGT---ACGCCCTATGTGT---CTCCCCA-----GAGAACAA  
 Chab GTATCCGCCCCCGTGTAG---AATGCCCTTAGTC---CCCTGCC-----GGGAAA  
 Chto GTATCCGCCCCCGTGTAG---AATGCCCTTAGTC---CCCTGCC-----GGGAAA  
 Majo GCATCCGCCCCCTGTGTAG---AATGCCCTCTCGTC---CTCCCTTT-----GAGAACAA  
 Hlst GCATCCACATTCCGTGTAA---AACGCCCTACCGTA---CCCGACCC-----GGGTACA  
 Clpe GTATCCGACCCCTGTGTAG---AATGCCCTACAGTT---CCCGCCT-----GGGAAACA  
 Mlmr GTATCCGCCCCGTGTAG---AATGCCCTACAATT---CCCTACTA-----GGGAAACA  
 Cr cr GTCTCCGCTCCCGTGTAG---AATGCCCTGCAGTTC---CCCTACC-----GGGAAACA  
 Muce GTCTCCGCTCCCGTGTAG---AATGCCCTGCAGTTC---CCCTACC-----GGGAAACA  
 Bege GTATCCGCCCCGTGTAG---AATGCCCTACAGTT---TCCCGCC-----GGAACAA  
 Mela GTATCCGATACCGTGTAG---GATGCCCTACAGTC---CCCGCC-----GGAAGACA  
 Hats GTATCCGCTACCGTGTAG---AATGCCCTACAGTT---TCCCGCC-----GGAACAA  
 Or la GTATCCGAGTCCGTGTAG---AATGCCCTACAGTT---TCCTTAAT-----GGAACAA

Cosa GTATCCGCACCCCGTGTAG---AATGCCCTTTAGTT---CCCCACCC-----GGCAACA  
 Exsp GTATCCGCACCCCTGTGTAG---AATGCCCTAAAGTT---CCCTA-CC-----GGAACA  
 Depa GTATCAGCACCCCGTGTAG---AATGCCCTGCAGTT---TCCTTTTA-----GGAACA  
 Rima GTATCCGCACCCCGTGTAG---AATGCCCTGCTT-----ITCTTCAT-----GAAAAA  
 Fuol GTATCCGCACCTCCTGTGTAG---AATGCCCTCAGTC---TCCCTTCA-----GGAACA  
 Gmaf GTATCCGCACCCCAGTAA---AATGCCCCCGCC---ITCTTAAA-----GAAACA  
 Xeei GTATCCGCACCCCGTGTAA---TATGCCCTACAATC---ITCTTCTAAG---GAAATTA  
 Pros GTATCCGCACCCCTGTGTAG---AATGTCCCTCACCGC---CCCGTCC-----GGCGTG  
 Scmi GTATCCGCACCCCTGTGTAG---AATGCCCTCCCCTC---CCTGCCA-----GGCAACG  
 Rolo GTCTCCGCACCCCTGTGTAG---AATGCCCTCATCC---CCCTGCC-----GGAAGTG  
 Cere GTCTCCGCACCCCGTGTAG---AATGCCCTCATCC---CCCGCTC-----GGCATCA  
 Daga GTCTCCGCACATCCGTGTAA---AATGCCCTTATCC---CCCGCTC-----GGAATA  
 Anco GTCTCCGCACCCCTGTGTAG---AATGCCCTCAGTC---CCCGCC-----GGCAACA  
 Dmve GTCTCCGCACCCCGTGTAG---AATGCCCTTGAGT---CCTAAAAT-----AGGACA  
 Dmar GTCTCCGCACCCCTGTGTAG---GATGCCCTTGAGTC---CTAGAAT-----AGGACA  
 Anka GTCTCCGCACCCCGTGTAG---AATGCCCTCAGTC---CCCCACCC-----GGCAACA  
 Moja GTCTCCGCACCCCGTGTAG---AATGCCCTCAGTC---CCCCACCC-----GGCAACA  
 Hoja GTATCCGCACCCCGTGTAG---AATGCCCTCAGTC---CCCTCC-----GGCAACA  
 Bede GTATCCGCACCCCTGTGTAG---AATGCCCTCATCTC---CCTGCC-----GGCGTG  
 Bsp GTATCCGCACCCCTGTGTAG---AATGCCCTCATCT---CCCTGCC-----GGCGTG  
 Mysp GTCTCAGCACCCCGTGTAG---AATGCCCTCAGCC---CTCTGCC-----GAGACA  
 Osja GTCTCAGCACCCCGTGTAG---AATGCCCTCAGTC---CCCGCC-----GGGACA  
 Sgro GTCTCCGCACCCCGTGTAG---AATGCCCTCAGTC---CCCTGCC-----GGGACA  
 Pzpa GTCTCCGCACCCCGTGTAG---AATGCCCTAAGTA---TCCCC-----GGAATA  
 Zeja GTCTCCGCACCCCGTGTAG---AATGCCCTAAATA---CCCTGCC-----GGAATA  
 Znne GTTTCCGCACCCCTGTGTAG---AATGCCCTAGATA---ACCTGCCCG-----GAAAT-T  
 Zefa GTTTCCGCACCCCTGTGTAG---AATGCCCTAGATA---ACCTGCC-----GGAATTT  
 Acni GTCTCCGCACCCCGTGTAG---AATGCCCTAAATA---CCCTGCC-----GGAATA  
 Ncrh GTCTCCGCACCCCGTGTAG---AATGCCCTAAATA---CCCTGCC-----GGAATA  
 Agca GTATCCGCACCCCTGTGTAG---AATGCCCTACAGTT---CCCGCC-----GGCAACA  
 Hydy GTATCCGCACCCCTGTGTAG---AATGCCCTACAGCC---CCCGCC-----GGGGCA  
 Gsac GTATCCGCACCCCTGTGTAG---GATGCCCTACAGTT---CCCGCC-----GGCAACA  
 Pevo GTATCCGCAACCCGTGTAA---AATGCCCTCCAAT---CTCTTG-----GACAACG  
 Hiku GCATCCGCACCTCCGTGTAG---AATGCCCTTAACC---CTCTTAT-----GAGATCA  
 Inpa GTCTCCGCACCCCAGTGTAG---AATGCCCCCGCCGTC---ITCCCGCC-----GAAACA  
 Auch GTATCCGCACCCCGTGTAG---GATGCCCAAGTT---CTCTATTT-----GAGACCT  
 Fico GTATCCGCACCCCTGTGTAG---GATGCCCTACAGCT---CTCATCC-----GAGAGCA  
 Macs GTATCCGCACCCCTGTGTAG---GATGCCCTACAGTT---CTCCGC-----GAGAAACA  
 Moal GTATCCGCACCCCGTGTAG---AATGCCCTTAAC---CCTCGTTC-----AGGAGTAG  
 Syma GTCTCCGCACCCCGTGTAG---AATGCCCTTAGCC---CTCCGCC-----GAGGAA  
 Mafr GTATCCGCACCCCGTGTAG---AATGCCCCACAGTT---ITCTTCC-----GAAACA  
 Dcpe GTATCCGCACCCCTGTGTAG---GATGCCCTTATT---CTTCTCCA-----AACATTT  
 Dcti GTATCCGCACCCCTGTGTAG---GATGCCCTACATT---CTTCTCCA-----AACAGCT  
 Hehi GTATCCGCACCCCTGTGTAG---AATGCCCTACAGCT---CCCTGCC-----GGAGCA  
 Stam GTATCCGCACCCCTGTGTAG---AATGCCCTACAGTT---CCCGCC-----GGCAACA  
 Hogi GTCTCCGCACCCCTGTGTAG---GATGCCCTACATT---CCCGCC-----TGAATA  
 Erzo GTATCCGCACCCCTGTGTAG---AATGCCCTACAGTT---CCCGCC-----GGCAACA  
 Hxot GTATCCGCACCCCTGTGTAG---AATGCCCTACAGTC---CCCGCC-----GGCAACA  
 Core GTATCCGCACCCCTGTGTAG---AATGCCCTACAGTT---CCCGCC-----GGCAACA  
 Apve GTATCCGCACCTCCTGTGTAG---AATGCCCTACAGTC---CCCGTCC-----GGCAACA  
 Latj GTATCCGCACCCCGTGTAG---AATGCCCAAGATT---CCCTGTTT-----GGCAACA  
 Laja GTATCCGCACCCCTGTGTAG---AATGCCCTATCGT---CCCGCC-----GGCAACA



Syja GTATCCGCACCCCGTGTAG---AATGCCCTTACGTC---CTCCACCAC-----GAA GACA  
 Epme GTATCCGCACCCCTGTGTAG---AATGCCCTACAGTT---CCCGCCC-----GGCAACA  
 Grse GTATCCGCATCCCGTGTAG---AATGCCCCACAGTTC---CCCATCC-----GGCAACA  
 Clja GTATCCGCCCCCGTGTAA---AATGCCCAATAAAAC---CCCTAACG-----GGCAAAA  
 Ogcy GTATCCGCACCCCGTGTAG---AATGCCCCACAAC---CTCCACCC-----GAGAACG  
 Plna GCCTCCAGGCCCGTGTAG---AATGCCCTATAGTT---CTCTGCC-----GAGAACAA  
 Lema GTATCCGCACCCCGTGTAG---AATGCCCTTACAGTT---TCCAGCAT-----GGAACAA  
 Etzo GTATCCGCATCCCGTGTAG---AATGCCCTACAGTT---CCCTGCC-----GGCAACA  
 Apse GTATCCGCACCCCGTGTAG---AATGCCCCACAGCT---CCCTGCC-----GGCAGCA  
 Epde GTATCCGCCTCCTGTGTAG---AATGCCCTACAGTT---CCCTGCC-----GGCAACA  
 Slja GTATCCGCCCCCGTGTAG---GATGCCCTATAGATT---CCCTACTA-----GGAAGCT  
 Bsja GTATCCGCACCCCGTGTAG---AATGCCCCACAGTC---CCCGCCC-----GGA GACA  
 Ecna GTATCCGCACCCCTGTGTAG---AATGCCCA TATTC---TCCGTAT-----GGA GATA  
 Cohi GTATCCGCCCCCGTGTAG---GATGCCCTACTC---TTC TTGCACT---GAA GATA  
 Caar GTATCCGCCCCCTGTGTAG---AATGCCCTTAGTG---CCCTTATT-----GAGCACA  
 Came GTATCCGCCCCCTGTGTAG---GATGCCCTTAGTA---CCCTTCTC-----GGCACA  
 Mema GTATCCGCACCCCGTGTAG---AATGCCCA CAGTC---CCCTGCTT-----GGCAACA  
 Lenu GTATCCGCATCCCTGTGTAG---AATGCCCC AACAGTC---TCC TACT-----GGA GACA  
 Plma GTATCCGCACCCCGTGTAG---AATGCCCC ACAGTT---TTC TGCTC-----GAA AACA  
 Emst GTATCCGCACCCCTGTGTAG---AATGCCCT ACAGTT---CCCTGTCT-----GGCAACA  
 Ptti GTATCCGCCCCCTGTGTAG---AATGCCCC ACAGTT---CCCTGTTT-----GGCAACA  
 Losu GTATCCGCCTCCCGTGTAG---AATGCCCT AACAGTC---CCCTGAAT-----GAG GACA  
 Geoy GTATCCGCACCCCTGTGTAG---GATGCCCT ACAGTT---CCCTGACT-----GGCAACA  
 Dipi GTATCCGCCTCCTGTGTAG---AATGCCCT AGTT-----TCC TGCTT-----GGT AACA  
 Pama GTATCCGCCCCCGTGTAG---AATGCCCT ATAGTC---TCC TGCC-----GGA AACA  
 Leob GTATCCGCACCCCGTGTAG---AATGCCCT GCAGCC---TCC TGCC-----GGA GACA  
 Neba GTATCCGC GAACCGTGTAG---AATGCCCT AAGTGC---TCC TCACCC-----GGA GCCA  
 Pdpi GTCTCCGCACCCCGTGTAG---GATTGCCC ATTGGCC---TCC CGACC-----GGA GGCC  
 Nimi GTATCCGCACCCCTGTGTAG---AATGCCCT AATAGCT---CCCGCCC-----GGCAACA  
 Uptr GCATCCGCCCCCTGTGTAG---AATGCCCT CTTCGTC---CTCCTTTT-----GAG AACA  
 Pesc GTATCCGCGTCCCTGTGTAA---AATGCCCT ATGCG---CCCTAGCC-----GGC CGCA  
 Baar GTATCCGCACCCCTGTGTAG---AATGCCCT TGAACC---CCCGCCAC-----GGC GACA  
 Moar GTATCCGCACCCCTGTGTAG---AATGCCCC ACAGTT---CCCGCCC-----GGCAACA  
 Toja GTATCCGCCCCCTGTGTAG---AATGCCCA CAGTT---CCCTCTC-----GGCAACA  
 Chau GTATCCGCCCCCTGTGTAG---AATGCCCT GTAAC---CTCTGGAT-----GAG ATCA  
 Chse GTATCCGCCTCCCGTGTAG---AATGCCCT TCAGTT---CCCTGCC-----GGCAACA  
 Enar GTATCCGCCTCCCGTGTAG---AATGCCCC ACAGTT---TCC TGCTC-----GGA AACA  
 Hpty GTATCCGCCTCCTGTGTAG---AATGCCCT ACAGTC---CCCGCCC-----GGCAACA  
 Nana GTATCCGCATCCCGTGTAG---AATGCCCA ACAGTT---CCCGCCCC-----GGCAACA  
 Mcst GTATCCGCCCCCA GTGTAG---GATGCCCT ACAGTT---CCCGCCC-----GGCAACA  
 Rhox GTATCCGCACCCCGTGTAG---AATGCCCT AACAGTT---CCCTGCC-----GGCAACA  
 Opfa GTATCCGCACCCCGTGTAG---AATGCCCC AACAGTT---CCCTGCC-----GGCAACA  
 Paar GTATCCGCACCCCGTGTAG---AATGCCCT ACAGTT---CCCGTCC-----GGCAACA  
 Gozo GTATCCGCACCCCGTGTAG---AATGCCCT ACAGTT---TCC CGTCC-----GGA AACA  
 Ackr GTATCCGCACCCCGTGTAG---AATGCCCT ATGGT---TCC TATTT-----GGA AACA  
 Elev GTATCCGCCTCCCGTGTAG---AATGCCCC ACAGTT---CTCTTAA-----GAG AACA  
 Trdu GTCTCCGCCCCCTGTGTAG---AATGCCCA CAGTT---TTC TGCC-----GAA AACA  
 Amoc GTATCCGCACCCCTGTGTAG---AATGCCCT CCAGTC---TCC CGCCC-----GGA AACA  
 Hame GTATCCGCACCCCGTGTAG---AATGCCCC ATAACC---TCC TGAATT-----GGA GATG  
 Chso GTATCCGCACCCCGTGTAA---AATGCCCC CCGCCC---CCCAACC-C-----GGCGGA  
 Lyto GTATCCGCCTCCTGTGTAG---AATGCCCC ACAGTT---CCCGCCC-----GGCAACA  
 Encr GTATCCGCCTCCTGTGTAG---AATGCCCT AATAGTT---CCCGTCC-----GGCAACA

|      |    |        |         |     |       |      |       |            |     |           |       |     |      |
|------|----|--------|---------|-----|-------|------|-------|------------|-----|-----------|-------|-----|------|
| Bvar | GT | ATCCGC | CCCCC   | GTG | AG--- | GAT  | GCCCT | TCGCT---   | CCC | CGCC      | ----- | GGC | ACCA |
| Noco | GT | ATCCGC | ACCCCT  | GTG | AG--- | AAT  | GCCCT | CAGTT---   | CCC | TGCT      | ----- | GGC | AACA |
| Chsp | GT | ATCCGC | CCCCA   | GTG | AA--- | AAC  | GCCCA | AGACCC---  | CCC | TACT      | ----- | GGC | ACCA |
| Arja | GT | ATCCGC | GCCCCT  | GTG | AG--- | AAT  | GCCCT | ACAGTT---  | CCC | CGCC      | ----- | GGC | AACA |
| Pase | GT | ATCCGC | ACCCCT  | GTG | AG--- | AAC  | GCCCC | AACAGAC--- | CTC | TGCC      | ----- | GAC | ATCA |
| Trel | GT | CTCCGC | ACCCCT  | GTG | AG--- | AAG  | GCCCT | AAGCTT---  | CCC | TACC      | ----- | GGC | AGCA |
| Lifa | GT | ATCCGC | ACCCCT  | GTG | AG--- | GAT  | GCCCC | ACAGCC---  | CCC | AGCC      | ----- | GGA | GCCA |
| Acur | GT | ATCCGC | ACACCA  | GTG | AG--- | AAT  | GCCCT | AACAGTC--- | AAC | TGAAT     | ----- | GAA | GACA |
| Ampe | GT | ATCCGC | ACCCCT  | GTG | AG--- | AAT  | GCCCT | ACAGTT---  | CCC | TGCC      | ----- | GGC | AACA |
| Urja | GT | ATCCGC | CCCCCG  | GTG | AAT-  | TAAT | GCCCA | CATAGTCCC  | CCC | ACCC      | ----- | GGC | AACA |
| Enet | GT | CTCCGC | ACGAGCC | GTG | AG--- | GAT  | GCCCC | TAGTC---   | TCT | TACC      | ----- | AGA | AACA |
| Ptbr | GT | CTCCGC | ATCCCT  | GTG | AG--- | AAT  | GCCCT | AATAC---   | TCC | TGAATA    | ----- | GGA | GAAA |
| Safa | GT | CTCCGC | ACCCCT  | GTG | AG--- | AAT  | GCCCT | ACAGTT---  | TCC | CTTC      | ----- | TGA | AACA |
| Icae | GT | ATCCGC | AACCCT  | GTG | AG--- | AAT  | GCCCC | ACAGTT---  | TTC | TGCC      | ----- | GAA | AACA |
| Asmi | GT | CTCCGC | ACCCCT  | GTG | AA--- | AAT  | GCCCT | TCTTTC---  | TTT | CTTCAAGA  | ----- | AAT | AGGA |
| Foal | GT | CTCCGC | ACCCCT  | GTG | AG--- | GAT  | GCCCA | CAACT---   | TTC | TAAT      | ----- | GAC | AACT |
| Drze | GT | ATCCGC | ATCCCT  | GTG | AG--- | AAT  | GCCCC | TACAGCT--- | CTC | TTAC      | ----- | GAC | AACA |
| Rhas | GT | ATCCGC | GTTCCC  | GTG | AG--- | AAT  | GCCCT | ACGATT---  | CCC | CTACA     | ----- | GGA | ATCA |
| Elac | GT | ATCCGC | ACCCCT  | GTG | AG--- | AAT  | GCCCT | ACCGTT---  | CCC | CCTTACTCC | ----- | GGC | AACA |
| Kugu | GT | ATCCGC | GCCCCT  | GTG | AG--- | AAT  | GCCCT | CAGTC---   | CCC | CAACC     | ----- | GGC | AACA |
| Plor | GT | ATCTGC | ACCCCG  | GTG | AG--- | AAT  | GCCCT | TACAGTT--- | CCC | CGCC      | ----- | GGC | AACA |
| Sgun | GT | ATCCGC | ACCCCT  | GTG | AG--- | AAT  | GCCCT | CAATC---   | CCC | CGCC      | ----- | GGC | AATA |
| Zaco | GT | ATCCGC | ACCCCT  | GTG | AG--- | AAT  | GCCCT | ACAGTC---  | CCC | TGCTT     | ----- | GGC | AACA |
| Zbfl | GT | ATCCGC | ACCCCT  | GTG | AG--- | AAT  | GCCCC | ACAGTT---  | CCC | TGCC      | ----- | GGC | AACA |
| Spba | GT | ATCCGC | CCTCCT  | GTG | AG--- | GAT  | GCCCA | TTTCT---   | CCC | TGTT      | ----- | GGC | AACA |
| Game | GT | ATCCGC | GACCCT  | GTG | AG--- | AAT  | GCCCC | ACAGTT---  | TTC | CGCC      | ----- | GAA | AACA |
| Thth | GT | ATCCGC | GACCCT  | GTG | AG--- | AAT  | GCCCC | ACAGTT---  | TTC | CGCC      | ----- | GAA | AACA |
| Xigl | GT | ATCCGC | CCCCCT  | GTG | AG--- | AAT  | GCCCA | TAATT---   | CCC | TGCTT     | ----- | GGC | AACA |
| Hyja | GT | ATCCGC | GTCCCC  | GTG | AG--- | AAT  | GCCCT | TGTT---    | TTC | CGCCA     | ----- | GAA | ACCA |
| Psan | GT | ATCCGC | ACCCCT  | GTG | AG--- | AAT  | GCCCT | TGTT---    | GTC | CGTTA     | ----- | GAA | ACCA |
| Cupa | GT | ATCCGC | GACCCT  | GTG | AG--- | AAT  | GCCCA | TAGTT---   | TTC | TGCC      | ----- | GAA | AACA |
| Mpch | GT | ATCCGC | ACCCCT  | GTG | AG--- | AAT  | GCCCT | ACAGTC---  | TCC | CTTACTAC  | ----- | GGA | AACA |
| Char | GT | ATCCGC | ACCCCT  | GTG | AA--- | AAT  | GCCCC | ACAGCT---  | CTC | CGCC      | ----- | GAC | AACA |
| Pser | GT | ATCCGC | GCCCC   | GTG | AG--- | AAT  | GCCCT | TGATC---   | CCC | CGCT      | ----- | GGC | GACA |
| Prol | GT | ATCCGC | CCCCCT  | GTG | AG--- | AAT  | GCCCA | TAACG---   | CCC | TGCT      | ----- | GGC | AACA |
| Plbi | GT | ATCCGC | CCCCCT  | GTG | AG--- | AAT  | GCCCA | CAACT---   | CCC | TGCTT     | ----- | GGC | AACT |
| Calu | GT | ATCCGC | ACCCCT  | GTG | AG--- | AAT  | ACCCA | TAGCC---   | CCC | TTTAT     | ----- | GAC | GGCA |
| Papa | GT | ATCCGC | ACCCCT  | GTG | AG--- | AAT  | GCCCT | TATGATA--- | CCT | TGT       | ----- | AGC | TACT |
| Sufr | GT | CTCCGC | ACCCCT  | GTG | AA--- | GAT  | GCCCT | TAGTT---   | CCC | CGCT      | ----- | GGC | AACA |
| Stci | GT | CTCCGC | GCCCC   | GTG | AG--- | AAT  | GCCCT | GCAACT---  | TCC | GCCCTC    | ----- | GGA | AATA |
| Taru | GT | ATCCGC | ATCCCA  | GTG | AA--- | AAT  | GCCCC | CCGCC---   | CCC | CGTC      | ----- | GGA | AATA |
| Rala | GT | ATCCGC | ACCCCT  | GTG | AG--- | AAT  | GCCCC | ACAGTT---  | TCC | TGCC      | ----- | GGA | AACA |

\* \* \* \*\* \*

|      | 9' | 11       | 12      | :    | HVR       | :     |
|------|----|----------|---------|------|-----------|-------|
| Scca | AG | GGGCGGGC | ATCAGGC | -ACA | CATTTTACA | ----- |
| Muma | AG | GAGCAGGT | ATCAGGC | -ACA | CGCA      | ----- |
| Erca | AG | GAGCAGGC | ATCAGGC | -ACG | TATTC     | ----- |
| Pose | AG | GAGCCGGC | ATCAGGC | -TCG | TGTT      | ----- |
| Actr | AG | GAGCAGGT | ATCAGGC | -ACG | CACCC     | ----- |
| Scal | AG | GAGCAGGT | ATCAGGC | -ACG | CACCC     | ----- |
| Posp | AG | GAGCAGGT | ATCAGGC | -ACG | CAACC     | ----- |
| Atsp | AG | GAGCAGGC | ATCAGGC | -ACA | CAACCC    | ----- |
| Leoc | AG | GAGCAGGC | ATCAGGC | -ACA | CGACC     | ----- |
| Amca | AG | GAGCCGGC | ATCAGGC | -ACA | CACACAT   | ----- |
| Osbi | AG | GAGCCGGT | ATCAGGC | -ACA | CAAA      | ----- |
| Pabu | AG | GAGCAGGT | ATCAGGC | -ACG | CATACA    | ----- |
| Hial | AG | GAGCAGGT | ATCAGGC | -ACG | CACCAC    | ----- |
| Elha | AG | GAGCGGGC | ATCAGGC | -ACG | CAACA     | ----- |
| Mlcy | AG | GAGCCGGC | ATCAGGC | -ACG | CATAC     | ----- |
| Algl | AG | GAGCCGGC | ATCAGGC | -ACA | CTTAAT    | ----- |
| Ptgi | AG | GGGCGGGC | ATCAGGC | -ACG | CAATTAA   | ----- |
| Alaf | AG | GAGCCGGC | ATCAGGC | -ACG | CAATTC    | ----- |
| Nock | AG | GAGCCGGC | ATCAGGC | -ACA | CTAAAAC   | ----- |
| Anja | AG | GAGCCGGC | ATCAGGC | -ACA | CCCGT     | ----- |
| Gyki | AG | GAGCAGGC | ATCAGGC | -ACA | CATT      | ----- |
| Syka | AG | GCGCCGGC | ATCAGGC | -ACA | CTAAATT   | ----- |
| Opma | GG | GAGCTGGC | ATCAGGC | -ACA | CCCCCG    | ----- |
| Comy | AG | GAGCCGGT | ATCAGGC | -ACA | CCAATCC   | ----- |
| Sasp | AG | GAGCTGGC | ATCAGGC | -TCA | CAAAC     | ----- |
| Eupe | AG | GAGTTGGC | ATCAGGC | -TCA | CTAA      | ----- |
| Enja | GG | GAGCCGGC | ATCAGGC | -ACA | ATTAT     | ----- |
| Same | AG | GAGCTGGT | ATCAGGC | -ACA | CGATTT    | ----- |
| Chch | AG | GAGCTGGC | ATCAGGC | -ACG | CTCA      | ----- |
| Grgr | AG | GGGCTGGT | ATCAGGC | -ACG | CACC      | ----- |
| Caau | AG | GAGCGGGC | ATCAGGC | -ACA | AATA      | ----- |
| Cyca | AG | GAGCGGGC | ATCAGGC | -ACA | AACA      | ----- |
| Dare | AG | GAGCAGGT | ATCAGGC | -ACA | AAAATT    | ----- |
| Cost | AG | GAGCAGGC | ATCAGGC | -ACA | AAT       | ----- |
| Leec | AG | GAGCGGGC | ATCAGGC | -ACT | AATATC    | ----- |
| CrIa | AG | GAGCGGGC | ATCAGGC | -TCA | ATTAT     | ----- |
| Clmc | AG | GAGCCGGC | ATCAGGC | -ACG | AACT      | ----- |
| Phin | GG | GAGCTGAC | ATCAGGC | -ACA | ACC       | ----- |
| Icpu | AG | GAGCAGGC | ATCAGGC | -ACA | CTTTCTACC | ----- |
| Psto | AG | GAGCAGGC | ATCAGGC | -ACA | ACTAACC   | ----- |
| Cora | AG | GAGCAGGC | ATCAGGC | -ACA | ATCAT     | ----- |
| Eisp | AG | GAGCAGGT | ATCAGGC | -ACA | TAGAT     | ----- |
| Apal | AG | GAGCAGGT | ATCAGGC | -ACA | CTAC      | ----- |
| EsLu | AG | GAGCTGGC | ATCAGGC | -ACA | CAT       | ----- |
| Dape | AG | GAGCTGGC | ATCAGGC | -ACG | CCCC      | ----- |
| Glse | AG | GAGCGGGC | ATCAGGC | -ACG | CTTA      | ----- |
| Naar | AG | GATCTGGC | AGCAGGC | -ACG | CTAC      | ----- |
| Baoc | AG | GAGCCGGT | ATCAGGC | -ACG | CCACC     | ----- |
| Opso | AG | GAGCTGGT | ATCAGGC | -ACG | CCTCC     | ----- |
| Alte | AG | GAGCCGGC | ATCAGGC | -ACA | CTTTG     | ----- |
| Plap | AG | GAGCCGGC | ATCAGGC | -ACG | CTCTCC    | ----- |

|      |                                           |
|------|-------------------------------------------|
| PlaI | AG-CAGCTGGTATCAGGC-ACGCCCACC-----         |
| Sami | AG-CAGCCGGTATCAGGC-GCCCGCAA-----          |
| Rere | AG-CAGCGGGATCAGGC-ACGCGCACTTCA-----       |
| Gama | AG-CAGCCGGCATCAGGC-TCAACCC-----           |
| Onmy | AG-CAGCCGGCATCAGGC-ACGCCA-----            |
| Sasa | AG-CAGCCGGCATCAGGC-ACGCCAA-----           |
| Cola | AG-CAGCTGGCATCAGGC-ACGCC-----             |
| Dita | AG-CAGCCGGCATCAGGC-GCAACCT-----           |
| Gogr | AG-CAGCCGGTATCAGGC-ACAACCCCAT-----        |
| Chsl | AG-CAGCTGGTATCAGGC-GCCCAACAC-----         |
| Atja | AG-CAGCCGGCATCAGGC-ACAATCAAATAAAA-----    |
| Iido | AG-CAGCTGGCATCAGGC-ACAATCAAATAAA-----     |
| Auja | AG-CAGCAGGCATCAGGC-ACGTTTTAC-----         |
| Chag | AG-CAGCAGGTATCAGGC-ACGCACGCAC-----        |
| Hami | AG-CAGCGGGATCAGGC-TCAATTGTAAG-----        |
| Saun | AG-CAGCGGGATCAGGC-TCCCATATC-----          |
| Nema | AG-CGGCAGACATCAGGC-ACGCC-----             |
| Disp | AG-CAGCGGACATCAGGC-ACGCGCC-----           |
| Myaf | AG-CAGCAGGCATCAGGC-ACAATTCC-----          |
| Lagu | AG-CAGCCGGCATCAGGC-ACAGACCCCTCC-----      |
| Trtr | GG-CAGCCGGCATCAGGC-ACAACCT-----           |
| Zucr | GG-CAGCTGGTATCAGGC-ACAAC-----             |
| Pxja | AG-CAGCTGGCATCAGGC-ACGCTTTCACAC-----      |
| Pxlo | AG-CAGCTGGCATCAGGC-ACGCTTACAC-----        |
| Pctr | AG-CAGCTGGTATCAGGC-ACAATCCGT-----         |
| Apsa | AG-CAGCCGGTATCAGGC-ACAACACTACCC-----      |
| Cabe | AG-CAGCCGGTATCAGGC-ACAGCCCT-----          |
| Bzze | AG-CAGCCGGCATCAGGC-ACAACCCG-----          |
| Siim | AG-CAGATGGTATCAGGC-ACAATACGT-----         |
| Ctru | AG-CAGCAGGTATCAGGC-ACTTCC-----            |
| Dpbr | AG-CAGCCGGTATCAGGC-ACGACCCGC-----         |
| Caki | AG-CAGCAGGTATCAGGC-ACGAGTAA-----          |
| Phja | AG-CAGCAGGCATCAGGC-ACAATCCCTT-----        |
| Brsp | AG-CAGCAGGTATCAGGC-CCAATA-----            |
| Gamo | AG-CAGCAGGTATCAGGC-ACAATCTAATAGTTTA-----  |
| Lolo | AG-CAGCAGGCATCAGGC-ACGTCAAATC-----        |
| Batr | TA-CAGCTGGTATCAGGC-ACAATAAT-----          |
| Prmy | CG-CGGCAGATATCAGGC-ACCCCTTT-----          |
| Loli | AA-CAGCAGGCATCAGGC-ACAACTT-----           |
| Loam | AG-CAGCAGGCATCAGGC-ACAAGACA-----          |
| Chab | AG-CAGCCGGTATCAGGC-ACTACCAACT-----        |
| Chto | AG-CAGCCGGTATCAGGC-ACTACCAACT-----        |
| Majo | AG-CAGCTGGTATCAGGC-ACAACAT-----           |
| Hlst | AG-CAGTAGGTATCAGGC-ACGACATTTTT-----       |
| Clpe | AG-CAGTGGTATCAGGC-ACAACA-----             |
| Mlmr | AG-CAGCCGGTATCAGGC-ACAAGAAACCAA-----      |
| Crcr | AG-CAGCTGGTATCAGGC-ACAAGCCTAATAAAGCT----- |
| Muce | AG-CAGCTGGTATCAGGC-ACAAGCCTAATAAAGCT----- |
| Bege | AG-CAGCCGGTATCAGGC-TCAATCCTCCC-----       |
| Mela | AG-CAGCTGGTATAAGGC-ACAATTAT-----          |
| Hats | AG-CAACTGGTATCAGGC-TCACTAAATACT-----      |
| Orla | AG-CAGCTGGTATCAGGC-ACAATAT-----           |

Cosa AG-CAGCTGGTATCAGGA-ACA AAAA-----  
 Exsp AG-CAGCTGGTATCAGGC-TCAAAT-----  
 Depa AG-CAGCCGGTATCAGGC-ACA AACTA-----  
 Rima AG-CAGCTGGTATCAGGC-ACA ACTTC-----  
 Fuol AG-CAGCTGGTATCAGGC-ACA ATAAAC-----  
 Gmaf AG-CAGCTGGTATCAGGC-ACC CACA-----  
 Xeei AG-CAGCTGGTATCAGGC-ACA CACAG-----  
 Pros AG-CAGCCGGTATCAGGC-ACC CCCT-----  
 Scmi AG-CAGCCGGTATCAGGC-ACC CCCC-----  
 Rolo AG-CAGCTGGTATCAGGC-ACC CTACC-----  
 Cere AG-CAGCTGGTATCAGGC-ACC CGTTAT-----  
 Daga AG-CAGCTGGCATCAGGC-ACC CACA-----  
 Anco AG-CAGCTGGTATCAGGC-ACC CCCATAT-----  
 Dmve AG-CAGCAGGTATCAGGC-ACA CCCC-----  
 Dmar AG-CAGCAGGTATCAGGC-ACC CCCCC-----  
 Anka AG-CAGCCGGTATCAGGC-ACC CCCC-----  
 Moja AG-CAGCTGGTATCAGGC-ACC CCCC-----  
 Hoja AG-CAGCTGGTATCAGGC-GCC CCCC-----  
 Bede AG-CAGCCGGCATCAGGC-TCC CCCC-----  
 Besp AG-CAGCCGGCATCAGGC-GCA CTCC-----  
 Mysp AG-CAGCAGGCATCAGGC-ACC CTCTC-----  
 Osja AG-CAGCAGGCATCAGGC-ACC CCTTC-----  
 Sgro AG-CAGCAGGTATCAGGC-ACC CCCCT-----  
 Pzpa AG-CAGCGGGCATCAGGC-ACC CACA-----  
 Zeja AG-CAGCTGGCATCAGGC-ACC CTAAC-----  
 Znne AG-CAGCTGGTATCAGGC-ACC CACTTT-----  
 Zefa AG-CAGCTGGTATCAGGC-ACC CTATCT-----  
 Acni AG-CAGCTGGCATCAGGC-ACC CTTT-----  
 Ncrh AG-CAGCTGGCATCAGGC-ACC CTTT-----  
 Agca AG-CAGCCGGCATCAGGC--ACACTCCTCCCT-----  
 Hydy AG-CAGCTGGTATCAGGC-ACA TTT-----  
 Gsac AG-CAGCTGGTATCAGGC-ACA TCTTTT-----  
 Pevo AG-CAGTGGTATCAGGC-ACA CAAA-----  
 Hiku AG-CAGCTGGTATCAGGT-ACA AATA-----  
 Inpa AG-CAGCCGGCATCAGGC-ACA ACCACCC-----  
 Auch CG-CAGCAGGTATCAGGC-GCC AGCCCC-----  
 Fico AG-CAGCTGGTATCAGGC-ACA ACTAC-----  
 Macs AG-CAGCTGGTATCAGGC--ACACCCAT-----  
 Moal AG-CAGCTGGTATCAGGC-ACA CTCCCT-----  
 Syma AG-CAGCTGGTATCAGGC-ACA CTCC-----  
 Maf r AG-CAGCTGGTATCAGGC-ACA CAACCCT-----  
 Dcpe AG-CAGCGGGCATCAGGC-ACA CAAT-----  
 Dct i AG-CAGCAGGTATCAGGC-ACA CAAT-----  
 Hehi AG-CAGCTGGTATCAGGC-ACA CACC-----  
 Stam AG-CAGCTGGTATCAGGC--ACATTTTAT-----  
 Hogi AG-CAGCCGGTATCAGGC-ACA AACACTG-----  
 Erzo AG-CAGCTGGTATCAGGC--ACATCCCAC-----  
 Hxot AG-CAGCTGGTATCAGGC--ACACCCCAT-----  
 Core AG-CAGCTGGTATCAGGC--ACATCCTAT-----  
 Apve AG-CAGCTGGTATCAGGC--ACACTCAT-----  
 Lat j AG-CAGCCGGTATCAGGC--GCACCTAAC-----  
 Laja AG-CAGCTGGTATCAGGT-ACA ACTAT-----



|      |                        |                                      |
|------|------------------------|--------------------------------------|
| Syja | AG-CAGCTGGTATCAGGC-ACA | TCCCTACATT-----                      |
| Epme | AG-CAGCAGGTATCAGGC-ACA | TATCCC-----                          |
| Grse | AG-CAGCTGGTATCAGGC-ACA | TCGTACACAT-----                      |
| Clja | AG-CAGCTGGTATCAGGC-ACA | CATACT-----                          |
| Ogcy | AG-CAGCTGATATCAGGC-ACA | TCCACGA-----                         |
| Plna | AG-CAGCCGGTATCAGGC-ACA | TATTC-----                           |
| Lema | AG-CAGCTGGTATCAGGC-ACA | TCAATT-----                          |
| Etzo | AG-CAGCTGGTATCAGGC-ACC | CCACTG-----                          |
| Apse | AG-CAGCTGGTATCAGGC-TCT | TTTCTTAAG-----                       |
| Epde | AG-CAGCTGGTATCAGGC--AC | ATTATAT-----                         |
| Slja | GG-CAGCAGGTATCAGGC-ACA | GATTCT-----                          |
| Bsja | AG-CAGCTGGTATCAGGC-ACA | CTATAACT-----                        |
| Ecna | AG-CAGCTGGTATCAGGC-ACA | CAACTCT-----                         |
| Cohi | AG-CAGCTGGTATCAGGC--AC | ACAAGC-----                          |
| Caar | AG-CAGCCGGTATCAGGC-ACA | CAACATACG-----                       |
| Came | AG-CAGCCGGTATCAGGC-ACA | CAACACA-----                         |
| Mema | AG-CAGCTGGTATCAGGC-ACC | CCCCCCCC-----                        |
| Lenu | AG-CAGCTGGTATCAGGC-ACC | CCCC-----                            |
| Plma | AG-CAGCTGGTATCAGGC-TCA | CCCCATTT-----                        |
| Emst | AG-CAGCCGGTATCAGGC--AC | ACTTAATTT-----                       |
| Ptti | AG-CAGCTGGTATCAGGC-ACA | ACTAACC-----                         |
| Losu | AG-CAGCCGGTATCAGGC-ACA | TATATT-----                          |
| Geoy | AG-CAGCTGGTATCAGGC-ACA | TCTTTGATCGTTGCGCCCTCCATCCTACTCTCCCC  |
| Dipi | AG-CAGCTGGTATCAGGC-ACA | ACCCACTCT-----                       |
| Pama | AG-CAGCTGGTATCAGGC-ACA | TACAA-----                           |
| Leob | AG-CAGCCGGTATCAGGC-ACA | TATACCCG-----                        |
| Neba | AG-CAGCTGGTATCAGGC-TCA | CCCTATCCATCTCATAATTTTTATGTTATGT----- |
| Pdpl | GG-CAGCTGGTATCAGGC-ACA | TATATT-----                          |
| Nimi | AG-CAGCTGGTATCAGGC-ACA | ACCCGCC-----                         |
| Uptr | AG-CAGCTGGTATCAGGC-ACA | TAT-----                             |
| Pesc | AG-CAGCTGGCATCAGGC-ACA | TCTTAATT-----                        |
| Baar | AG-CAACCGGTATCAGGC-ACA | ACCCCGT-----                         |
| Moar | AG-CAGCTGGTATCAGGC-ACA | ACTCACC-----                         |
| Toja | AG-CAGCTGGTATCAGGC-TCA | CCTTTCCTT-----                       |
| Chau | AG-CAGCTGGTATCAGGC-ACA | CTTAAAT-----                         |
| Chse | AG-CAGCTGGTATCAGGC--AC | ACCCTAAT-----                        |
| Enar | AG-CAGCCGGTATCAGGC-ACA | TACTA-----                           |
| Hpty | AG-CAGCCGGTATCAGGC-ACA | ACTAC-----                           |
| Nana | AG-CAGCTGGTATCAGGC-ACA | TCTTAT-----                          |
| Mcst | AG-CAACTGGTATCAGGC-ACA | TATTAT-----                          |
| Rhox | AG-CAGCTGGCATCAGGC-ACA | TTCCTT-----                          |
| Opfa | AG-CAGCTGGTATCAGGC-ACA | CCCCATT-----                         |
| Paar | AG-CAGCTGGTATCAGGC-TCG | ACACCT-----                          |
| Gozo | AG-CAGCTGGTATTAGGC-ACA | TCCATA-----                          |
| Ackr | AG-CAGCTGGTATCAGGC-CCA | CTACC-----                           |
| Elev | AG-CAGCTGGTATCAGGC-TCA | AAAC-----                            |
| Trdu | AG-CAGCTGGTATCAGGC-ACA | CTTTCC-----                          |
| Amoc | AG-CAGCCGGTATCAGGC-ACC | GTAGAC-----                          |
| Hame | AG-CAGCTGGTATCAGGC-ACA | TATTAT-----                          |
| Chso | AG-CAGCTGGTATCAGGC-ACA | AATCCAT-----                         |
| Lyto | AG-CAGCAGGTATCAGGC--AC | ACCTCTAGC-----                       |
| Encr | AG-CAGCTGGTATCAGGC-ACA | ACCCTA-----                          |

|      |                                           |
|------|-------------------------------------------|
| Bvar | AG-CAGCCGGTATCAGGC-ACAACCTA-----          |
| Noco | AG-CAGCTGGTATCAGGC-ACAATT-----            |
| Chsp | AAGCAGCCGGTATCAGGC-ACATAATATG-----        |
| Arja | AG-CAACTGGTATCAGGC-ACATACTGT-----         |
| Pase | AG-CAGCCGGCATCAGGC-ACC CCCTTAT-----       |
| Trel | AG-CAGCAGGTATCAGGC-ACTGACCCTAC-----       |
| Lifa | AG-CAGCCGGTATCAGGC-GCATAAA-----           |
| Acur | AG-CAGCAGGCATCAGGC-ACATAAGTTATTACTTA----- |
| Ampe | AG-CAGCTGGTATCAGGC-ACA CTAGT-----         |
| Urja | AG-CAGCCGGCATCAGGC-CCACTCTAC-----         |
| Enet | AG-CAGCCGATATCAGGC-ACA CACCCGC-----       |
| Ptbr | AG-CAGCGGGTATCAGGC-ACCCTCTACGA-----       |
| Safa | AG-CAGCAGGTATCAGGC-ACA CTAC-----          |
| Icae | AG-CAGCCGGTATCAGGC--ACACCCAATT-----       |
| Asmi | GG-CAGTGGATATCAGGC-ACA TCTCA-----         |
| Foal | AG-CAGCTGGTATCAGGC-TCATAA-----            |
| Drze | AG-CAGCAAGCATCAGGC-ACA AATATAAA-----      |
| Rhas | AG-CAGCCGGTATCAGGC-ACA ACTTCAGAC-----     |
| Elac | AG-CAGCTGGTATCAGGC-ACA ACCTATTGT-----     |
| Kugu | AG-CAGCTGGTATCAGGC-ACA AACTTTAAAAC-----   |
| Plor | AG-CAGCTGGTATCAGGC-ACC TAAAAC-----        |
| Sgun | AG-CAGTGGTATCAGGC-ACA TACTA-----          |
| Zaco | AG-CAGCCGGTATCAGGC-ACA ATTACT-----        |
| Zbfl | AG-CAGCTGGTATCAGGC-ACA ATCTCCTTGT-----    |
| Spba | TG-CAGCCGGTATCAGGC-ACA CTCTT-----         |
| Game | AG-CAGCTGGTATCAGGC-ACC CCCTACC-----       |
| Thth | AG-CAGCTGGTATCAGGC-ACA CCAATT-----        |
| Xigl | AG-CAGCCGGTATCAGGC-ACA CTCTACTA-----      |
| Hyja | AG-CAGCTGGTATCAGGC--ACATCCCTTAT-----      |
| Psan | AG-CAGCTGGTATCAGGC-ACA ACCCTAAC-----      |
| Cupa | AG-CAGCTGGTATCAGGC-ACA CCAATCT-----       |
| Mpch | AG-CAGCTGGTATCAGGC-ACA TAAAATC-----       |
| Char | AG-CAGCCGGTATCAGGC-TCGATACAC-----         |
| Pser | AG-CAGCCGGTATCAGGC-ACA AGCCATAT-----      |
| Prol | AG-CAGCTGGCATCAGGC-ACA GACATA-----        |
| Plbi | AG-CAGCCGGTATCAGGC-ACA AGCCCAG-----       |
| Calu | TG-CAGTGGTATCAGGC-GC ACGACTAGATCTAAT----- |
| Papa | AG-CAGCTGACATCAGGC--ACA CAAACG-----       |
| Sufr | AG-CAGCTGGTATCAGGC-ACA ATCCAAA-----       |
| Stci | AG-CAGCTGGCATCAGGC-ACA ATAACA-----        |
| Taru | GG-CAGTGGTATCAGGC-ACA CAAATT-----         |
| Rala | AG-CAGCTGGTATCAGGC--ATCTCAACT-----        |

\* \* \*\*

|      | 12'      | 11'                           | 13                          | 13'  | 8'                                     | 14  | 14'               | HVR 1   |
|------|----------|-------------------------------|-----------------------------|------|----------------------------------------|-----|-------------------|---------|
| Scca | -----TG  | <b>T</b> - <b>GGCC</b> CAAGAC | <b>GCC</b> TT <b>GC</b> TCA | ---  | <b>GC</b> - <b>CAC</b> AC <b>CC</b> T  | --- | AAG <b>GC</b> TT  | ----    |
| Muma | -----CG  | <b>T</b> - <b>AGCC</b> CAAGAC | <b>ACC</b> TT <b>GC</b> T   | --A- | <b>AGC</b> - <b>CAC</b> AC <b>CC</b> C | --  | CAAG <b>GC</b> AT | TTTC--  |
| Erca | -----AC  | <b>-GGCC</b> CAAAAC           | <b>GCC</b> TT <b>GC</b> T   | --T- | <b>TGC</b> - <b>CAC</b> AC <b>CC</b> C | --  | CAC <b>GC</b> AT  | -TT--   |
| Pose | -----CAC | <b>-GGCC</b> CAAAAC           | <b>GCC</b> TT <b>GC</b> TTT | ---  | <b>GC</b> - <b>CAC</b> AC <b>CC</b> C  | --  | CAC <b>GC</b> AT  | -----   |
| Actr | -----GC  | <b>-AGCC</b> CAAGAC           | <b>GCC</b> TT <b>GC</b> TA  | ---  | <b>AGC</b> - <b>CAC</b> AC <b>CC</b> C | --  | CAAG <b>GC</b> AA | -----   |
| Scal | -----GC  | <b>-AGCC</b> CAAGAC           | <b>GCC</b> TT <b>GC</b> TA  | ---  | <b>AGC</b> - <b>CAC</b> AC <b>CC</b> C | --  | CAAG <b>GC</b> AA | -----   |
| Posp | -----GC  | <b>-AGCC</b> CAAGAC           | <b>GCC</b> TT <b>GC</b> TA  | ---  | <b>AGC</b> - <b>CAC</b> AC <b>CC</b> C | --  | CAAG <b>GC</b> AA | ACTC--  |
| Atsp | -----GT  | <b>-AGCC</b> CAAGAC           | <b>GCC</b> TT <b>AC</b> T   | ---  | <b>GT</b> - <b>CAC</b> AC <b>CC</b> C  | --  | CAAG <b>GC</b> AA | ACTC--  |
| Leoc | -----CG  | <b>T</b> - <b>AGCC</b> CAAGAC | <b>GCC</b> TT <b>AC</b> T   | ---  | <b>GT</b> - <b>CAC</b> AC <b>CC</b> C  | --  | CAAG <b>GC</b> AA | ACTC--  |
| Amca | -----TG  | <b>T</b> - <b>AGCC</b> CAAAAC | <b>GCC</b> TT <b>GC</b> T   | ---  | <b>GC</b> - <b>CAC</b> CC <b>CC</b> C  | --  | CAAG <b>GC</b> AA | ATTC--  |
| Osbi | -----TG  | <b>T</b> - <b>AGCC</b> TAAAAC | <b>GCC</b> TT <b>GC</b> T   | ---  | <b>GC</b> - <b>CAC</b> AC <b>CC</b> C  | --  | CAAG <b>GC</b> AA | CACC--  |
| Pabu | -----TG  | <b>C</b> - <b>AGCC</b> AAAAAC | <b>ACC</b> TT <b>GT</b> T   | ---  | <b>AC</b> - <b>CAC</b> AC <b>CC</b> C  | --  | CAAG <b>GC</b> AA | TACTC-- |
| Hial | -----GC  | <b>-AGCC</b> CAAGAC           | <b>GCC</b> TT <b>GT</b> T   | ---  | <b>GC</b> - <b>CAC</b> AC <b>CC</b> C  | --  | CAAG <b>GC</b> AA | -----   |
| Elha | -----GC  | <b>-AGCC</b> CAAGAC           | <b>GCC</b> TT <b>GT</b> T   | ---  | <b>AGC</b> - <b>CAC</b> AC <b>CC</b> C | --  | CAAG <b>GC</b> AA | -----   |
| Mlcy | -----GC  | <b>-AGCC</b> CAAGAC           | <b>GCC</b> TT <b>GT</b> T   | --C- | <b>AGC</b> - <b>CAC</b> AC <b>CC</b> C | --  | CAAG <b>GC</b> AA | -CT--   |
| Algl | -----GT  | <b>-AGCC</b> CAAGAC           | <b>GCC</b> TT <b>GC</b> T   | ---  | <b>GC</b> - <b>CAC</b> AC <b>CC</b> C  | --  | CAAG <b>GC</b> AA | GGCCGA  |
| Ptgi | -----TG  | <b>C</b> - <b>AGCC</b> CAAGAC | <b>GCC</b> TT <b>GC</b> T   | ---  | <b>AGC</b> - <b>CAC</b> AC <b>CC</b> C | --  | CAAG <b>GC</b> AA | -----   |
| Alaf | -----GC  | <b>-AGCC</b> CAAGAC           | <b>GCC</b> TT <b>GC</b> T   | ---  | <b>GC</b> - <b>CAC</b> AC <b>CC</b> C  | --  | CAAG <b>GC</b> AA | AATCC-- |
| Nock | -----GT  | <b>-AGCC</b> CAAGAC           | <b>GCC</b> TT <b>GC</b> T   | --T- | <b>AGC</b> - <b>CAC</b> AC <b>CC</b> C | --  | CAAG <b>GC</b> AA | -TT--   |
| Anja | -----GT  | <b>-AGCC</b> CAAAAC           | <b>GCC</b> TT <b>GC</b> T   | ---  | <b>AGC</b> - <b>CAC</b> GC <b>CC</b> A | --  | CAAG <b>GC</b> AA | AATTC-- |
| Gyki | -----TG  | <b>T</b> - <b>AGCC</b> CAAAAC | <b>GCC</b> TT <b>GC</b> T   | ---  | <b>AGC</b> - <b>CAC</b> AC <b>CC</b> C | --  | CAAG <b>GC</b> AA | AACGC-- |
| Syka | -----GT  | <b>-AGCC</b> CAAGAC           | <b>GCC</b> TT <b>GC</b> T   | ---  | <b>GC</b> - <b>CAC</b> AC <b>CC</b> C  | --  | CAAG <b>GC</b> AA | GACCC-- |
| Opma | -----GG  | <b>T</b> - <b>AGCC</b> CAAAAC | <b>GCC</b> TT <b>GC</b> T   | --A- | <b>AGC</b> - <b>CAC</b> AC <b>CC</b> C | --  | CAAG <b>GC</b> AA | AATTC-- |
| Comy | -----GG  | <b>T</b> - <b>AGCC</b> CAAAAC | <b>GCC</b> TT <b>GC</b> T   | ---  | <b>GC</b> - <b>CAC</b> AC <b>CC</b> C  | --  | CAAG <b>GC</b> AA | AATTC-- |
| Sasp | -----GT  | <b>-AGCC</b> CAAAAC           | <b>GCC</b> TT <b>GC</b> T   | --A- | <b>AGC</b> - <b>CAC</b> AC <b>CC</b> C | --  | CAAG <b>GC</b> AA | AAATT-- |
| Eupe | -----GT  | <b>-AGCC</b> CAAAAC           | <b>GCC</b> TT <b>GT</b> T   | ---  | <b>AC</b> - <b>CAC</b> AC <b>CC</b> C  | --  | CAAG <b>GC</b> AA | -CC--   |
| Enja | -----GT  | <b>-AGCC</b> CAAAAC           | <b>GCC</b> TT <b>GC</b> T   | ---  | <b>GC</b> - <b>CAC</b> AC <b>CC</b> C  | --  | CAAG <b>GC</b> AA | -----   |
| Same | -----TA  | <b>-AGCC</b> CAAGAC           | <b>GCC</b> TT <b>GC</b> T   | ---  | <b>AGC</b> - <b>CAC</b> AC <b>CC</b> C | --  | CAAG <b>GC</b> AA | AACT--  |
| Chch | -----AG  | <b>-TGCC</b> CAAGAC           | <b>GCC</b> TT <b>GC</b> T   | --T- | <b>TGC</b> - <b>CAC</b> AC <b>CC</b> C | --  | CAAG <b>GC</b> AA | AACTC-- |
| Grgr | -----GC  | <b>-AGCC</b> CATGAC           | <b>GCC</b> TT <b>GC</b> T   | ---  | <b>GC</b> - <b>CAC</b> CC <b>CC</b> C  | --  | CAAG <b>GC</b> AA | AATTC-- |
| Caau | -----TT  | <b>-AGCC</b> CAAGAC           | <b>GCC</b> T <b>AGC</b> C   | --G- | <b>AGC</b> - <b>CAC</b> AC <b>CC</b> C | --  | CAAG <b>GC</b> AA | AATTC-- |
| Cyca | -----TT  | <b>-AGCC</b> CAAGAC           | <b>GCC</b> T <b>AGC</b> A   | ---  | <b>AGC</b> - <b>CAC</b> AC <b>CC</b> C | --  | CAAG <b>GC</b> AA | -----   |
| Dare | -----TT  | <b>-AGCC</b> CAAGAC           | <b>GCC</b> T <b>AGC</b> AA  | ---  | <b>GC</b> - <b>CAC</b> AC <b>CC</b> C  | --  | CAAG <b>GC</b> AA | GATCC-- |
| Cost | -----TT  | <b>-AGCC</b> CAAGAC           | <b>GCC</b> TT <b>GC</b> T   | ---  | <b>GC</b> - <b>CAC</b> AC <b>CC</b> C  | --  | CAAG <b>GC</b> AA | AACTC-- |
| Leec | -----TT  | <b>-AGCC</b> CAAGAC           | <b>GCC</b> TT <b>GC</b> T   | ---  | <b>GC</b> - <b>CAC</b> AC <b>CC</b> C  | --  | CAAG <b>GC</b> AA | -----   |
| CrIa | -----TT  | <b>-AGCC</b> CAAGAC           | <b>GCC</b> TT <b>GC</b> T   | --A- | <b>CGC</b> - <b>CAC</b> AC <b>CC</b> C | --  | CAAG <b>GC</b> AA | -CT--   |
| Clmc | -----AC  | <b>-AGCC</b> CAAGAC           | <b>GCC</b> TT <b>GC</b> T   | ---  | <b>CGC</b> - <b>CAC</b> AC <b>CC</b> C | --  | CAAG <b>GC</b> AA | AACTC-- |
| Phin | -----CC  | <b>-CGCC</b> CAAGAC           | <b>GTC</b> TT <b>GC</b> TTT | ---  | <b>GC</b> - <b>CAC</b> AC <b>CC</b> C  | --  | CAAG <b>GC</b> AA | AACTC-- |
| Icpu | -----CC  | <b>-CGCC</b> CAAGAC           | <b>GCC</b> TT <b>GC</b> T   | ---  | <b>GC</b> - <b>CAC</b> AC <b>CC</b> C  | --  | CAAG <b>GC</b> AA | AACTC-- |
| Psto | -----TC  | <b>-TGCC</b> CAAGAC           | <b>GCC</b> TT <b>GC</b> T   | ---  | <b>GC</b> - <b>CAC</b> AC <b>CC</b> C  | --  | CAAG <b>GC</b> AA | ACTTC-- |
| Cora | -----TT  | <b>-GGCC</b> CAAGAC           | <b>GCC</b> TT <b>GC</b> TTT | ---  | <b>GC</b> - <b>CAC</b> AC <b>CC</b> C  | --  | CAAG <b>GC</b> AA | AATTC-- |
| Eisp | -----CT  | <b>-AGCC</b> CAAGAC           | <b>GCC</b> TT <b>GC</b> T   | ---  | <b>GC</b> - <b>CAC</b> GC <b>CC</b> C  | --  | CAAG <b>GC</b> AA | -----   |
| Apal | -----TT  | <b>-AGCC</b> CAAGAC           | <b>GCC</b> TT <b>GC</b> T   | ---  | <b>GC</b> - <b>CAC</b> AC <b>CC</b> T  | --  | CAAG <b>GC</b> AA | -A----  |
| EsLu | -----TG  | <b>T</b> - <b>AGCC</b> CAAGAC | <b>GCC</b> TT <b>GC</b> T   | ---  | <b>GC</b> - <b>CAC</b> AC <b>CC</b> C  | --  | TAC <b>GC</b> TA  | -----   |
| Dape | -----GC  | <b>-AGCC</b> CAAGAC           | <b>GCC</b> TT <b>GC</b> T   | --A- | <b>AGC</b> - <b>CAC</b> AC <b>CC</b> C | --  | CAC <b>GC</b> AA  | CAATC-- |
| Glse | -----AG  | <b>-AGCC</b> CAAAAC           | <b>GCC</b> TT <b>GC</b> T   | --A- | <b>TGC</b> - <b>CAC</b> AC <b>CC</b> C | --  | TAAG <b>GC</b> AA | AACTC-- |
| Naar | -----AG  | <b>-AGCC</b> CAATAC           | <b>GCC</b> TT <b>GC</b> T   | ---  | <b>ATC</b> - <b>CAC</b> AC <b>CC</b> C | --  | CAAG <b>GC</b> AA | AACTC-- |
| Baoc | -----GC  | <b>-AGCC</b> CAAGAC           | <b>GCC</b> TT <b>GC</b> T   | ---  | <b>GC</b> - <b>CAC</b> AC <b>CC</b> C  | --  | CAAG <b>GC</b> AA | -----   |
| Opso | -----GC  | <b>-AGCC</b> CAAAAC           | <b>GCC</b> TT <b>GC</b> T   | ---  | <b>AGC</b> - <b>CAC</b> AC <b>CC</b> C | --  | TAAG <b>GC</b> AA | TATTC-- |
| Alte | -----TT  | <b>-AGCC</b> CAAGAC           | <b>GCC</b> TT <b>GC</b> T   | ---  | <b>GC</b> - <b>CAC</b> AC <b>CC</b> C  | --  | CAAG <b>GC</b> AA | AACTC-- |
| Plap | -----AC  | <b>-AGCC</b> CAAGAC           | <b>GCC</b> TT <b>GC</b> T   | ---  | <b>GC</b> - <b>CAC</b> AC <b>CC</b> C  | --  | CAAG <b>GC</b> AA | -AG---- |

Plal -----GC-AGCCCAAGACGCCTTGT--T-AGC-CACACCC--CAAGGCTATT---  
 Sami -----GC-AGCCCAAGACGCCTTGTTC---GC-CACACCC--CAAGGCTACTC--  
 Rere -----GC-AGCCCAAGACGCCTTGTTTA---GC-CACACCC--CAAGGCTA-----  
 Gama -----AC-AGCCCAAGACGCCTTGCTAA---GC-CACACCC--CAAGGCTAACTC--  
 Onmy -----GGC-AGCCCACGACGCCTTGCTA--AGC-CACACCC--CAAGGCTAACTC--  
 Sasa -----GC-AGCCCAAGACGCCTTGCTAA---GC-CACACCC--CAAGGCTAACTC--  
 Cola -----GGC-AGCCCAAGACGCCTTGCT--A-AGC-CACACCC--CAAGGCTAACT---  
 Dita -----GT-AGCCCAAGACGCCTTGCT--A-AGC-CACACCC--CAAGGCTAACTC--  
 Gogr -----AA-AGCCCAAGACGCCTTGCTTA---GC-CACACCC--CAAGGCTAA-----  
 Chsl -----GC-AGCCCACAAACGCCTTGCT--T-AGC-CACACCC--CAAGGCTACTC--  
 Atja -----GAT-AGCCCAAAACGCCTTGCTTA---GC-CATACCC--CAAGGCTAACTC--  
 lido -----GAC-AGCCCAAAACGCCTTGCTTA---GC-CATACCC--CAAGGCTAA-----  
 Auja -----TT-AGCCCAAGACGCCTTGCTT---AGC-CACACCC--TAAGGCTAACTC--  
 Chag -----GC-AGCCCAAGACGCCTTGCTC--AGC-CACACCC--TAAGGCTACTC--  
 Hami -----CC-AGCCCAAGACGCCTTGCTAC---GC-CACACCC--TAAGGCTACTC--  
 Saun -----CC-TGCCCAAAACGTC--GTC--GC-CACACCC--CAAGGCTAA-----  
 Nema -----GC-AGCCCAAGACGTC--GTC--GC-CACACCC--CAAGGCTAACTC--  
 Disp -----CGT-AGCCCACGACGTC--GTC--GC-CACACCC--TAAGGCTACTC--  
 Myaf -----GT-AGCCCAAGACGCCTTGCTT---AGC-CACACCC--CAAGGCTAACTC--  
 Lagu -----CT-AGCCCAAGACGCCTTGCTCA---GC-CACACCC--CAAGGCTAA-----  
 Trtr -----TT-AGCCCATGACGCCTTGCTTC---GC-CACACCC--TAAGGCTACTC--  
 Zucr -----TTT-AGCCCATGACGCCTTGCTTA---GC-CACACCC--TAAGGCTA-----  
 Pxja -----GC-AGCCCAAGACGCCTTGCT--T-AGC-CACACCC--CAAGGCTAA-CT--  
 Pxlo -----GC-AGCCCAAGACGCCTTGCTTA---GC-CACACCC--CAAGGCTAA-----  
 Pctr -----GT-GGCCCAAGACGCCTTGCTCA---GC-CACACCC--CAAGGCTAA-----  
 Apsa -----GT-AGCCCAAGACACC--GCTTA---GC-CACACCC--CACGCTCTTC--  
 Cabe -----GT-TGCCCACGACGCCTTGCTCA---GC-CACACCC--CACGCTAACTC--  
 Bzze -----AT-AGCCCACGACGCCTTGCTTA---GC-CACACCC--CAAGGCTAACTC--  
 Siim -----ATT-AGCCGACGACACC--GCTACA---GC-CACGCC--CAAGGCTAATC--  
 Ctru -----TC-CGCCCACTACGCCTTGCT--A-AGC-CACACCC--CAAGGCTACTC--  
 Dpbr -----TC-AGCCCATGACACC--GCTA---AGC-CACACCC--CAAGGCTACTC--  
 Caki -----TC-AGCCCAATACACC--GCTTT---GTC-CACACCC--CACGCTAATC--  
 Phja -----TT-AGCCCAAGACGCCTTGCTCA---GC-CACGCC--CACGCTAATC--  
 Brsp -----TG-AGCCCATGACGCCTAGCTAA---GC-CACACCC--CACGCTAACTC--  
 Gamo -----CT-AGCCCATAACGCCTTGCTC--AGC-CACACCC--TACGCTAATC--  
 Lolo -----TC-AGCCCATAACGCCTTGCT--C-AGC-CACACCC--TACGCTAATC--  
 Batr -----TAT-AGCCCACAAACACC--GCTT---AGC-CAC--GCT--TAA--G--ACAC--  
 Prmy -----GGC-AGCCCATGACATC--GCT--T-AGC-CACACCTC--CAAGGCTAA--CA--  
 Loli -----GTA-AGCCCATGACGCCTCGCTCA---AGC-CACACCC--CACGCTACTC--  
 Loam -----CTT-GGCCCATGACGCCTTGCTAA---GC-CACACCC--CACGCTAACTC--  
 Chab -----GA-AGCCCACGACACC--GCTCCAC-AGC-CACACCC--CAAGGCTAATC--  
 Chto -----GA-AGCCCACGACACC--GCTCCAC-AGC-CACACCC--CAAGGCTAATC--  
 Majo -----GTT-AGCCCACGACACC--GCTTT---GC-CACACCC--CAAGGCTAACTC--  
 Hlst -----TC-AGCCCACGACGCCTCGCTC--ATC-GCCACTATA-CAAGGCTAAATC--  
 Clpe -----CA-CGCCCACGACACC--GCTCAT-AGC-CACACCC--CAAGGCTACTC--  
 Mlmr -----AA-AGCCCACGACACC--GCTCAT-AGC-CACACCC--CAAGGCTAACTC--  
 Crcr -----AC-CGCCCACGACACC--GCTTA---GC-CACACCC--CAAGGCTAATC--  
 Muce -----AC-CGCCCACGACACC--GCTTA---GC-CACACCC--TAAGGCTAATC--  
 Bege -----CC-CGCCCATGACACC--GCTT---AGC-CACACCC--CAAGGCTAATC--  
 Mela -----TT-AGCCCACGACACC--GCTTA---GC-CACACCC--CAAGGCTAATC--  
 Hats -----TT-AGCCCACGACACC--GCTC--AGC-CACACCC--CAAGGCTAATC--  
 Orla -----AA-TGCCCATAACACC--GCTT---AGC-CACACCC--CAAGGCTAA-----

Cosa -----TT-AGCCCATAACACC TTGC T--C-AGC-CACACCC--CAAGGC AATTC--  
Exsp -----CT-AGCCCATGACACC TTGC T--A-AGC-CACACCC--CAAGGC AT-TT--  
Depa -----TT-AGCCCACAAACACC TTGC TT--TGC-CACACCC--CAAGGC AATTC--  
Rima -----TT-AGCCCATAACGCC TTGC TTA--GC-CACACCC--CAAGGC AA-----  
Fuol -----TT-GGCCCATGACACC TTGC TT--AGC-CACACCC--TAAGGC AATTC--  
Gmaf -----GC-AGCCCATGACACC TTGC T--A-AGC-CACACCC--CAAGGC AACT--  
Xeei -----CT-AGCCCACGACACC TTGC T--T-AGC-CACACCC--CAAGGC AATTC--  
Pros -----GC-AGCCCAAGACGCC TTGT TCA--GC-CACACCC--CAAGGC ACCTC--  
Scmi -----GC-AGCCCAAGACGCC TTGT TCA--GC-CACACCC--TAAGGC AA-----  
Rolo -----GC-AGCCCAAGACGCC TTGC TTA--GC-CACACCC--CAAGGC AACTC--  
Cere -----CGC-AGCCCAAGACACC TTGC TCA--GC-CACACCC--TAAGGC AGCTC--  
Daga -----TGC-AGCCCAAGACGCC TTGC TC--AGC-CACACCC--CAAGGC AA-----  
Anco -----GC-AGCCCAAGACGCC TTGC TAA--GC-CACACCC--CAAGGC AACTC--  
Dmve -----GGT-AGCCCATGACGCC TTGT TTA--GC-CACACCC--CAAGGC AACTC--  
Dmar -----GC-AGCCCATGACATC TTGT T--T-AGC-CACACCC--CAAGGC AG-CT--  
Anka -----GGC-AGCCCAAGACGCC TTGC T--A-AGC-CACACCC--CAAGGC AACTC--  
Moja -----GGC-AGCCCAAGACGCC TTGC T--A-AGC-CACACCC--CAAGGC AA-CT--  
Hoja -----GGC-AGCCCAAGACGCC TTGC TAA--GC-CACACCC--CAAGGC AACTC--  
Bede -----GC-AGCCCAAGACGCC TTGT TCA--GC-CACACCC--CAAGGC AGCTC--  
Besp -----GC-AGCCCAAGACGCC TTGT TCA--GC-CACACCC--CAAGGC AACTC--  
Mysp -----GC-AGCCCAAAACGCC TTGC T--T-AGC-CACACCC--CAAGGC AACTC--  
Osja -----GC-AGCCCAAAACGCC TTGC TT--AGC-CACACCC--CAAGGC AA-----  
Sgro -----GC-AGCCCAAAACGCC TTGC TCA--GC-CACACCC--CAAGGC AACTC--  
Pzpa -----TGC-AGCCCATAACGCC TTGC TTA--GC-CACACCC--CAAGGC ACCTC--  
Zeja -----GC-AGCCCAAGACGCC TTGC TTA--GC-CACACCC--CAAGGC CCTTC--  
Znne -----TT-AGCCCAAGACGCC TTGC T--T-AGC-CACACCC--CAAGGC AC-CT--  
Zefa -----TT-AGCCCAAGACGCC TTGC TTA--GC-CACACCC--TAAGGC AG-----  
Acni -----AGC-AGCCCAAGACGCC TTGC TT--AGC-CACACCC--CAAGGC AGCTC--  
Ncrh -----AGC-AGCCCAAGACGCC TTGC TTA--GC-CACACCC--CAAGGC AACTC--  
Agca -----TC-AGCCCACGACGCC TTGC TTA--GC-CACACCC--CAAGGC AA-----  
Hydy -----TT-AGCCCACGACGCC TTGC TTA--GC-CACACCC--CAAGGC AA-----  
Gzac -----TG-AGCCCACGACACC TTGC TT--AGC-CACACCC--CAAGGC AA-----  
Pevo -----GT-TGCCCACGACACC TTGC TCA--GC-CACACCC--CAAGGC AAA-C--  
Hiku -----TT-TGCCCATAACACC TTGC TT--AGC-CACACCC--CAAGGC AATTC--  
Inpa -----TT-AGCCCACGACGCC TTGC T--T-AGC-CACACCC--CAAGGC GCTCC--  
Auch -----CTC-AGCCCATAACACC TTGT TCA--GC-CACACCC--CAAGGC CA-----  
Fico -----CT-AGCCCACAAACACC TTGC TCA--GC-CACACCC--CAAGGC AA-----  
MacS -----TC-AGCCTACGACACC TTGC TT--AGC-CACACCC--CAAGGC AA-----  
Moal -----GT-AGCCCAAGACACC TTGT TTA--GC-CACATCC--CAAGGC AA-----  
Syma -----GT-AGCCCACAAACACT TTGC TC--AGC-CACACCC--CAAGGC TA-----  
Mafr -----AA-AGCCCACGACACC TTGC ACA--GC-CACACCC--CAAGGC AA-----  
Dcpe -----TGTTAGCCCATGACGCC TTGT TTA--GC-CACACCC--TAAGGC AACTC--  
Dcti -----TGTTAGCCCACAAACGCC TTGT TTA--GC-CACACCC--CAAGGC AACTC--  
Hehi -----TGTAAGCCCATGACACC TTGC T--T-AGC-CACACCC--CAAGGC AA-CT--  
Stam -----TA-AGCCCATGACACC TTGC TTA--GC-CACACCC--CAAGGC AACTC--  
Hogi -----TT-AGCCCACGACACC TTGC TT--AGC-CACACCC--TAAGGC AA-----  
Erzo -----TG-AGCCCATGACGCC TTGC T--T-AGC-CACACCC--CAAGGC AA-CT--  
Hxot -----TA-AGCCCATGACACC TTGC T--T-AGC-CACACCC--CAAGGC AA-CT--  
Core -----TG-AGCCCACGACACC TTGC TTA--GC-CACACCC--CAAGGC AACTC--  
Apve -----CG-AGCCCATAACACC TTGC TTA--GC-CACACCC--CAAGGC AA-----  
Latj -----TA-AGCCCACAAACACC TTGC TTT--GC-CACACCC--CAAGGC AACCC--  
Laja -----GT-AGCCCACGACACC TTGC TTA--GC-CACACCC--CAAGGC AACTC--



Syja -----AT-AGCCCAAGACACC TTGC TT---AGC-CACCCCT--CAAGGC AATCC--  
 Epme -----TAT-AGCCCACAAACACC TTGC T--T-AGC-CACACCT--CAAGGC AATCC--  
 Grse -----CT-TGCCCATGACACC TTGC TTA---GC-CACACCC--CAAGGC AACGC--  
 Clja -----TT-AGCCCACGACACC TTGCA--T-AGC-CACACCC--CAAGGC TAATC--  
 Ogcy -----GATAAGCCCACAAACATC TTGC TC---AGC-CACACCC--CAAGGC AATTC--  
 Plna -----ATT-AGCCCATGACGCC TTGC TTA---GC-CACACCC--CAAGGC AATTC--  
 Lema -----AA-AGCCCACGACGCC TTGC TC---AGC-CACACCC--CAAGGC AACTC--  
 Etzo -----CT-AGCCCACGACACC TTGC T--T-AGC-CACACCC--CATGGC AACT--  
 Apse -----AAATAAGCCCACGACACC TTGC TTA---GC-CACACCT--CAAGGC ATCTC--  
 Epde -----TC-AGCCCATGACACC TTGC TTA---GC-CACACCT--CAAGGC AA-----  
 Slja -----TC-AGCCCACAAACACC TTGT TCA---GC-CACACCC--CAAGGC TA-----  
 Bsja -----GA-AGCCCACGACACC TTGC TCA---GC-CACACCT--CAAGGC TAATC--  
 Ecna -----TGT-AGCCCATAACACC TTGC TTA---GC-CACACCC--CAAGGC AACCC--  
 Cohi -----TC-AGCCCACAAACACC TTGC TA---AGC-CACACCC--CAAGGC AA-----  
 Caar -----TT-AGCCCACGACACC TTGC TTA---GC-CACACCC--CAAGGC AATCC--  
 Came -----TGT-AGCCCACAAACACC TTGC T--T-AGC-CACACCC--CAAGGC AATCC--  
 Mema -----AC-AGCCCACGACACC TTGC TT---AGC-CACACCT--CAAGGC AA-----  
 Lenu -----CC-CGCCCACGACACC TTGC TTA---GC-CACACCC--CAAGGC AACTC--  
 Plma -----CA-AGCCCACGACGCC TTGC T--T-AGC-CACACCT--CAAGGC AACTC--  
 Emst -----TA-AGCCCATGACGCC TTGC TTA---GC-CACACCT--CAAGGC AACTC--  
 Ptti -----CT-AGCCCATGACACC TTGC TTA---GC-CACACCT--CAAGGC AACTC--  
 Losu -----TAT-AGCCCATAACACC TTGC T--C-AGC-CACACCC--CAAGGC AAATT--  
 Geoy CCCCCCCGCGC-CGCCCAAACACC TTGC T--T-TGC-CACACCT--CAAGGC AACTC--  
 Dipi -----CA-AGCCCATGACACC TTGC TTA---GC-CACACCT--CAAGGC AATTC--  
 Pama -----TAT-AGCCCACGACACC TTGC T--C-AGC-CACACCC--CAAGGC TACTC--  
 Leob -----TT-AGCCCACAAACACC TTGC T--C-AGC-CACACCT--CAAGGC AACTT--  
 Neba -----TT-TGCCCATGACACC TTGC TTA---GC-CACACCC--CAAGGC TATTC--  
 Pdpi -----TT-AGCCCACGACGCC TTGC TT---AGC-CACACCC--CAAGGC TA-----  
 Nimi -----GT-AGCCCACGACACC TTGC TTT---GC-CACACCT--CAAGGC AA-----  
 Uptr -----TGT-AGCCCACGACACC TTGC T--T-TGC-CACACCC--CAAGGC AACTC--  
 Pesc -----AT-TGCCCATAACGCC CTGC T--T-AGC-CACACCC--CACGGC AA-TC--  
 Baar -----TT-AGCCCAAGACACC TTGC TTTA-TGC-CACACCTATTAATGCAGCC--  
 Moar -----TA-AGCCCATGACACC TTGC TTA---GC-CACACCT--TCAAGGC AA-CT--  
 Toja -----CA-AGCCCACGACACC TTGC T--T-AGC-CACACCT--CAAGGC AA-TT--  
 Chau -----GT-AGCCCACGACGCC TTGC TTA---GC-CACACCC--CAAGGC AG-----  
 Chse -----TA-AGCCCACGACACC TTGC TAA---GC-CACACCC--CAAGGC AATTC--  
 Enar -----CT-AGCCCATGACACC TTGC TT---AGC-CACACCT--CAAGGC AACTC--  
 Hpty -----CC-AGCCCATAACACC TTGC TT---AGC-CACACCT--CAAGGC AA-----  
 Nana -----TT-AGCCCACGACACC TTGC TT---AGC-CACACCC--CAAGGC AACCC--  
 Mcst -----TAT-AGCCCACGACGCC TTGC TTA---GC-CACACCC--CAAGGC AA-----  
 Rhox -----AC-AGCCCACGACGCC TTGC TT---AGC-CACACCT--CAAGGC AA-----  
 Opfa -----TA-AGCCCACGACACC TTGC TTA---GC-CACACCT--CAAGGC AATTC--  
 Paar -----TC-AGCCCACAAACACC TTGC TCA---GC-CACACCC--CAAGGC ATTGC--  
 Gozo -----TT-AGCCCACGACACC TTGC TTA---GC-CACACCT--CAAGGC AACTC--  
 Ackr -----GT-AGCCCACGACACC TTGC T--C-AGC-CACACCC--CAAGGC AATTC--  
 Elev -----TTT-AGCCCATGACACC TTGC TTA---GC-CACACCC--CAAGGC AATTC--  
 Trdu -----GC-AGCCCATGACACC TTGC TTA---GC-CACACCT--CAAGGC AACTC--  
 Amoc -----AC-TGCCCATGACACC TTGC TT---AGC-CACACCT--CAAGGC ACATC--  
 Hame -----TT-AGCCCACGACGCC TTGC TT---GC-CACACCC--CAAGGC AATTC--  
 Chso -----TT-AGCCAACGACACCTAGCCTA---GC-CACACCC--CAAGGC ACTAC--  
 Lyto -----TG-AGCCCATGACGCC TTGC TT---AGC-CACACCT--CAAGGC AA-----  
 Encr -----GTG-AGCCCACGACGCC TTGC TTA---GC-CACACCT--CAAGGC AACTC--

Bvar -----G**T**-AGCC**C**ACGAC**ACC**TT**GT**TTA---GC-CAC**CC**CC**C**--CAAG**GC**TA-----  
 Noco -----T**T**-AGCC**C**CATGAC**ACC**TT**GT**TT---AGC-CAC**AC**CC**C**--TAAG**GC**AACTC--  
 Chsp -----C**C**-CGCC**C**CACAAC**ACC**TG**GT**TTT---AGC-CAC**CC**CC**C**--CACG**GC**TA-----  
 Arja -----A**G**-AGCC**C**ACGAC**ATC**TT**GC**T--A-AGC-CAC**AC**CC**C**--CAAG**GC**AACTC--  
 Pase -----G**G**-AGCC**C**CATGAC**GCC**TA**GC**T--T-AGC-CAC**AC**CC**C**--CAAG**GC**AATG---  
 Trel -----C**T**-AGCC**C**CAAGAC**GCC**TT**GC**CCA---GC-CAC**AC**CC**C**--TAAG**GC**AACTC--  
 Lifa -----T**T**-AGCC**C**CATAAC**ACC**TT**GC**TC---AGC-CAC**AC**CC**C**--CAAG**GC**TACTC--  
 Acur -----C**T**-AGCC**C**ACGAC**ACC**TT**GC**TAAT---GC-CAC**AC**CC**C**--CACG**GC**TATAC--  
 Ampe -----G**T**-AGCC**C**ACGAC**ACC**TT**GC**TTA---GC-CAC**AC**CC**C**--CAAG**GC**AA-----  
 Urja -----T**C**-CGCC**C**CATGAC**GCC**TT**GC**T--T-AGC-CAC**AC**CC**C**--CAAG**GC**AACCC--  
 Enet -----A**C**-TGCC**C**ACGAC**ATC**TT**GC**TTT---GC-CAC**GC**CC**C**--CAAG**GC**AA-----  
 Ptbr -----AG**C**-AGCC**C**CATGAC**GCC**TT**GT**TTA---A**C**-CAC**AC**CC**C**--CAAG**GC**CT-----  
 Safa -----AG**T**-AGCC**C**CACTAC**ACC**TT**GC**TT---AGC-CAC**AC**CC**C**--CAAG**GC**ATCTC--  
 Icae -----T**A**-AGCC**C**ACGAC**GCC**TT**GC**TT---AGC-CAC**AC**CC**C**--CAAG**GC**AA-----  
 Asmi -----GA**T**-G**CC**C**C**TAAAAC**ATC**TA**GC**TA---AGC-CAC**AC**CC**C**--CAAG**GC**TT-----  
 Foal -----T**A**-CGCC**C**ACGAC**GCC**TT**GC**TC---AGC-CAC**AC**CC**C**--CAAG**GC**TCTAC--  
 Drze -----T**T**-AGCC**C**CATAAC**GCT**TT**GC**T--T-AGC-CAC**AC**CC**C**--CAAG**GC**ATTTC--  
 Rhas -----G**T**-AGCC**C**TACAAC**ACC**TT**GC**TCA---GC-CAC**AC**CC**C**--CAAG**GC**AACTC--  
 Elac -----T**T**-AGCC**C**ACGAC**ACC**TT**GC**TC---AGC-CAC**AC**CC**C**--CAAG**GC**AA-----  
 Kugu -----T**T**-AGCC**C**TACAAC**ACC**TT**GC**TTA---GC-CAC**AC**CC**C**A--CAAG**GC**AACTC--  
 Plor -----T**A**-AGCC**C**ACGAC**ACC**TT**GC**TTA---GC-CAC**AC**CC**C**--CAAG**GC**AA-----  
 Sgun -----C**T**-AGCC**C**CATGAC**ACC**TT**GC**TTA---GC-CAC**AC**CC**C**--CAAG**GC**AACTC--  
 Zaco -----G**A**-AGCC**C**CATGAC**ACC**TT**GC**TTA---GC-CAC**AC**CC**C**--CAAG**GC**AATTC--  
 Zbfl -----T**T**-AGCC**C**CATGAC**ACC**TT**GC**TT---AGC-CAC**AC**CC**C**--CAAG**GC**AACTC--  
 Spba -----AG**T**-AGCC**C**ACGAC**ACC**TT**GC**TAA---GC-CAC**GC**CC**C**--CAAG**GC**AATTC--  
 Game -----C**G**-AGCC**C**CATGAC**GCC**TT**GC**T--T-AGC-CAC**AC**CC**C**A--CAAG**GC**ATCTC--  
 Thth -----A**A**-AGCC**C**CATGAC**GCC**TT**GC**TTA---GC-CAC**AC**CC**C**--CAAG**GC**AACTC--  
 Xigl -----T**T**-AGCC**C**CATGAC**GCC**TT**GC**TTA---GC-CAC**AC**CC**C**--CAAG**GC**AA-----  
 Hyja -----T**G**-AGCC**C**ACGAC**GCC**TT**GT**TC---AGC-CAC**AC**CC**C**--CAAG**GC**AA-----  
 Psan -----T**G**-AGCC**C**CATGAC**GCC**TT**GT**T--T-AGC-CAC**AC**CC**C**--CAAG**GC**AA-TT--  
 Cupa -----C**A**-AGCC**C**CATGAC**GCC**TT**GC**TTA---GC-CAC**AC**CC**C**--CAAG**GC**AACTC--  
 Mpch -----A**T**-AGCC**C**CATGAC**GCC**TT**GC**TTA---GC-CAC**AC**CC**C**--CAAG**GC**AACTC--  
 Char -----C**C**-AGCC**C**ACGAC**GCC**TT**GC**TC---AGC-CAC**AC**CC**C**--CAAG**GC**AA-----  
 Pser -----C**T**-G**CC**C**C**CATGAC**ACC**TT**GC**CTC---AGC-CAC**AC**CC**C**--CAAG**GC**AATCC--  
 Prol -----T**C**-G**CC**C**C**ACGAC**GCC**TT**GC**T--T-AGC-CAC**AC**CC**C**--CAAG**GC**AACTC--  
 Plbi -----C**T**-AGCC**C**ACGAC**GCC**TT**GC**TTA---GC-CAC**AC**CC**C**--CAAG**GC**AC-----  
 Calu -----G**T**-AGCC**C**CAGAAC**ACC**TT**GC**TTA---GC-CAC**AC**CC**C**--CAAG**GC**TACTC--  
 Papa -----T**A**-AGCC**C**CAAGAC**GTC**TT**GC**TTTTTT**GC**-CAC**AC**CC**C**--CAAG**GC**AAATC--  
 Suf r -----A**T**-AGCC**C**CAAGAC**ACC**TT**GC**TTA---GC-CAC**GC**CC**C**--CAAG**GC**AA-----  
 Stci -----A**T**-AGCC**C**CAAGAC**GCC**TT**GC**T--T-AGC-CAC**AC**CC**C**--CAAG**GC**AA-CT--  
 Taru -----T**G**-AGCC**C**CATGAC**ACC**TA**GC**TTT---GC-CAC**GC**CC**C**--CAAG**GC**AA-----  
 Rala -----G**A**-AGCC**C**CAAGAC**ACC**TT**GC**T--T-AGC-CAC**AC**CC**C**--CAAG**GC**AC-CT--

\*\* \* \*\*

|      |          | HVR    |          | 6'           |          | 15        |       | 15'    |        | 5'    |        | 4'    |
|------|----------|--------|----------|--------------|----------|-----------|-------|--------|--------|-------|--------|-------|
| Scca | ----     | TTCA   | GCAGTA   | AATAACAT     | TGATTACA | TAAGC     | GT-AA | GCTTGA | AATCA  | GTTA  | A-AGT  |       |
| Muma | -----    | A      | GCAGTA   | AATAACAT     | TAATTCA  | TGAGC     | GA-AA | GCTTGA | AATTA  | GTTA  | A-AGT  |       |
| Erca | -----    | CA     | GCAGTG   | AATAACAT     | TAGGCAA  | TCAGC     | GA-AA | GCTAG  | ACCTA  | GTTA  | T-TGT  |       |
| Pose | ----     | TTCA   | GCAGTG   | AATAACAT     | TAGGCA   | ATCAGC    | GA-AA | GCTAG  | ACCTA  | GTTA  | A-TGGT |       |
| Actr | ----     | CTCA   | GCAGTG   | AATAACAT     | TGAGC    | TATGAGC   | GC-AA | GCTCG  | ACTCA  | GCC   | A-GAGT |       |
| Scal | ----     | CTCA   | GCAGTG   | ATAGACAT     | TGAGC    | CATGAGC   | GT-AA | GCTCG  | ACTCA  | GCC   | A-GAGT |       |
| Posp | -----    | A      | GCAGTG   | AATAACAT     | TGAGCCA  | TGAGC     | GC-AA | GCTCG  | ACTCA  | GCC   | A-GAGT |       |
| Atsp | -----    | A      | GCAGTG   | ATAGACAT     | TAAGC    | AA        | TAAGC | GA-AA  | GCTTGA | ACTTA | GTTA   | A-AGC |
| Leoc | -----    | A      | GCAGTG   | AATAACAT     | TAAGC    | AA        | TAAGC | GA-AA  | GCTTGA | ACTTA | GTTA   | A-AGC |
| Amca | -----    | A      | GCAGTG   | AATAATTT     | TAAGC    | AA        | TAAGC | GA-AA  | GCTTGA | ACTTA | GTTA   | A-TGT |
| Osbi | -----    | A      | GCAGTG   | ATTAACAT     | TAAAT    | --        | TAAGC | GA-AA  | GCTTGA | ATTTA | GTTA   | T-AGT |
| Pabu | -----    | A      | GCAGTG   | ATTAATAT     | TAAAA    | -CA       | TGAAC | GA-AA  | GCTCA  | AATTA | GTTA   | A-AGC |
| Hial | ----     | TTCA   | GCAGTG   | AATAACAT     | TGAGC    | -CA       | TAAGC | GA-AA  | GCTTGA | ACTCA | GTTA   | A-AGT |
| Elha | ----     | CTCA   | GCAGTG   | ATAGACAT     | TAAGC    | -CA       | TAAGC | GA-AA  | GCTTGA | ACTTA | GTTA   | A-AGT |
| Mlcy | -----    | CA     | GCAGTG   | AATAACAT     | TAGGCAA  | -TTAGT    | GA-AA | ACTAG  | ACCTA  | GTTA  | A-AGT  |       |
| Algl | AGGGTTCC | GCAGTG | ATAGACAT | TAAGC        | -TATGAGT | GA-AA     | GCTCG | ACTTA  | GTTA   | A-GGG |        |       |
| Ptgi | ----     | CCC    | GCAGTG   | AATAACAT     | TAAGC    | -CA       | TAAGC | GA-AA  | GCTCG  | ACTTA | GTTA   | A-AGC |
| Alaf | -----    | A      | GCAGTG   | AATAACAT     | TAAGC    | -CA       | TAAGC | GA-AA  | GCTAG  | ACTTA | GTTA   | A-AGC |
| Nock | -----    | CA     | GCAGTG   | AATAACAT     | TAAGCTA  | -TAAGC    | GA-AA | GCTAG  | ACTTA  | GTTA  | A-AGT  |       |
| Anja | -----    | A      | GCAGTG   | ATAGATAT     | TAAGCAA  | -TAAGC    | GA-AA | GCTTGA | ACTTA  | GTTA  | A-AGC  |       |
| Gyki | -----    | A      | GCAGTG   | ACAAACAT     | TAAGC    | -CA       | TGAGC | GA-AA  | GCTTGA | ACTTA | GTTA   | A-GGT |
| Syka | -----    | A      | GCAGTG   | AATAATAT     | TAAGC    | -CA       | TAAGC | GA-AA  | GCTTGA | ACTTA | GTTA   | A-AGC |
| Opma | -----    | A      | GCAGTA   | ATTAATAT     | TAGGC    | -CA       | TAAGC | GA-AA  | GCTTGA | ACTTA | GTTA   | A-AGT |
| Comy | -----    | A      | GCAGTG   | ATTAATAT     | TATAA    | -TATGAGC  | GA-AA | GCTCG  | ACCTA  | GTTA  | A-AGC  |       |
| Sasp | -----    | CA     | GCAGTG   | ATAGACAT     | TAAGCTA  | -TAAGA    | GA-AA | ACTCG  | ACTTA  | GTTA  | A-GAG  |       |
| Eupe | -----    | A      | GCAGTG   | AATAACAT     | TAAGC    | -CA       | TGAGC | GA-AA  | GCTCG  | ACTTA | GTTA   | A-AGT |
| Enja | ----     | TTCA   | GCAGTG   | AATAACAT     | TAAGC    | -CA       | TAAGC | GA-AA  | GCTTGA | ACTTA | GTTA   | A-AGC |
| Same | ----     | CTTCA  | GCAGTG   | AATAACAT     | TAAGC    | -CA       | TAAGT | GA-AA  | ACTTGA | ACTTA | GTTA   | A-GGT |
| Chch | -----    | A      | GCAGTG   | AATAACAT     | TAGGCATA | TAAGT     | GC-AA | ACTTGA | ACCTA  | GTTA  | A-AGT  |       |
| Grgr | -----    | A      | GCAGTG   | ATTAACAT     | TGAGC    | -TATTAAGT | GA-AA | ACTTGA | ACTTA  | GTTA  | A-GGT  |       |
| Caau | -----    | A      | GCAGTG   | AATAACAT     | TAAGCCA  | -TAAGT    | GA-AA | ACTTGA | ACTCA  | GTTA  | A-TGT  |       |
| Cyca | ----     | TTCA   | GCAGTG   | AATAACAT     | TAAGC    | -CA       | TAAGT | GA-AA  | ACTTGA | ACTCA | GTTA   | A-GGT |
| Dare | -----    | A      | GCAGTG   | ACAAACAT     | TAAGC    | -TATTAAGT | GA-AA | ACTTGA | ACTCA  | GTTA  | A-AGT  |       |
| Cost | -----    | A      | GCAGTG   | AATAATAT     | TAAGC    | -CA       | TAAGT | GA-AA  | ACTTGA | ACTTA | GTTA   | A-AGC |
| Leec | ----     | TTCA   | GCAGTG   | AATAATAT     | TAAGC    | -CA       | TAAGT | GA-AA  | ACTTGA | ACTTA | GTTA   | A-GTC |
| CrIa | -----    | CA     | GCAGTG   | AATAAAAT     | TAAGCCA  | -TGAGC    | ACTAA | GCTTGA | ACTTA  | GTTA  | A-TGT  |       |
| Clmc | -----    | A      | GCAGTA   | AATAATAT     | TAAGC    | -CA       | TAAGT | GA-AA  | ACTTGA | ACTTA | GTTA   | A-GGC |
| Phin | -----    | A      | GCAGTA   | GTAAACAT     | TAAGC    | -CA       | TAAGT | GA-AA  | ACTTGA | ACTTA | GTTA   | A-GAT |
| Icpu | -----    | A      | GCAGTA   | ATAGACAT     | TAAGC    | -CA       | TAAGT | GT-AA  | ACTTGA | ACTTA | GTTA   | A-GGC |
| Psto | -----    | A      | GCAGTA   | AATAATAT     | TAAGC    | -CA       | TAAGT | GA-AA  | ACTTGA | ACTTA | GTTA   | A-AGT |
| Cora | -----    | A      | GCAGTA   | GTAAATAT     | TAAGC    | -CA       | TAAGT | GA-AA  | ACTTGA | ACTTA | GTTA   | A-AGT |
| Eisp | ----     | CTCA   | GCAGTA   | AATAACAT     | TAAGC    | -AA       | TAAGT | GA-AA  | ACTTGA | ACTTA | GTTA   | A-GGT |
| Apal | ----     | TCCA   | GCAGTA   | ATTAACAT     | TAAGC    | -AA       | TAAGT | GA-AA  | ACTTGA | ACTTA | GTTA   | A-GGC |
| EsLu | ----     | CTCA   | GCAGTG   | AATAATAT     | TAAGT    | -GATAAGC  | GA-AA | GCTTGA | ACTTA  | GTTA  | A-TGT  |       |
| Dape | -----    | A      | GCAGTG   | AATAATCT     | TAAAA    | -AA       | TAAGC | GA-AA  | GCTTGA | ACTTA | GTTA   | A-TAT |
| Glse | -----    | A      | GCAGTG   | AATAACAT     | TAAGCCA  | -TAAGC    | GT-AA | GCTTGA | ACTTA  | GTTA  | A-AGC  |       |
| Naar | -----    | A      | GTA      | ACTGATAAACAT | TAAGC    | -CA       | TGAGC | GA-AA  | GCTTGA | ACTTA | GTTA   | A-AGT |
| Baoc | ----     | CTCA   | GCAGTG   | AATAACAT     | TAAGCC   | -A        | TAAGC | GT-AA  | GCTTGA | ACTTA | GTTA   | A-AGT |
| Opso | -----    | A      | GCAGTA   | ACAAACAT     | TAAGCCA  | -TGAGC    | GA-AA | GCTTGA | ACTTA  | GTTA  | A-AGT  |       |
| Alte | -----    | A      | GCAGTG   | GTAAACAT     | TAAGC    | -CA       | TAAGT | GA-AA  | ACTTGA | ACTTA | GTTA   | A-AGC |
| Plap | ----     | CTCA   | GCAGTG   | GTAAACAT     | TAAGCCA  | TAAGT     | GA-AA | ACTTGA | ACTTA  | GTTA  | A-GGC  |       |

Plal -----CA**GCAGT**GATAGACAT**TAAGCAA**-**TAAGC**GA-AA**GCTTGA**CTAG**GTT**A-C**GGT**  
 Sami -----A**GCAGT**GATAGACAT**TAAGC**-AA**TAAGC**GA-AA**GCTTGA**CTAG**GTT**A-C**GGT**  
 Rere -----TTCA**GCAGT**AATAGACAT**TAAGC**-CA**TGAGC**GA-AA**GCTCGA**CTAG**GTT**A-A**GGT**  
 Gama -----A**GCAGT**GATAGACAT**TAAGC**-CA**TGAGC**GG-AA**GCTCGA**CTTA**GTT**A-A**GGT**  
 Onmy -----A**GCAGT**GATAAATAT**TAAGC**-CA**TAAGC**GA-AA**GCTTGA**CTTA**GTT**A-A**GGT**  
 Sasa -----A**GCAGT**GATAAATAT**TAAGC**-CA**TAAGC**GA-AA**GCTTGA**CTTA**GTT**A-A**AGT**  
 Cola -----CA**GCAGT**GATAGATAT**TAAGCTA**-**TAAGC**GA-AA**GCTTGA**CTTA**GTT**A-A**GGT**  
 Dita -----A**GCAGT**GATAAATAT**TAAGCCA**-**TGGGC**GG-AA**GCCCGA**CTTA**GTT**A-A**GGT**  
 Gogr -----CTCA**GCAGT**GAAAAACT**TAAGC**-AA**TAAGC**GA-AA**GCTAG**ACTCA**ATC**A-G**GGT**  
 Chsl -----A**GCAGT**GATAAATTT**TAAGCCA**-**TAAGC**GA-AA**GCTTGA**CTTA**GTT**C-C**GGT**  
 Atja -----A**GCAGT**GATAAACAT**TAAGC**-TA**TTAGT**GA-AA**ACTTGA**CTTA**GTT**A-A**AGA**  
 lido -----CTCA**GCAGT**GATAAACAT**TAAGC**-CA**TTAGT**GA-AA**ACTTGA**CTTA**GTT**A-A**AGA**  
 Auja -----A**GCAGT**GATAAACAT**TAAGCCA**-**TAAGT**GA-AA**ACTTGA**CTTA**GTT**A-A**AGT**  
 Chag -----CTCA**GCAGT**GATAGACAT**TAAGC**-AA**TGAGT**GA-AA**ACTCGA**CTTA**GTT**A-C**GGT**  
 Hami -----A**GCAGT**GATAAACAT**TAAGC**-CA**TGAGC**GA-AA**GCTCGA**CTTA**ATC**A-A**AGT**  
 Saun -----CTCA**GCAGT**GATAGACAT**TAAGC**-TA**TGAGT**GA-AA**ACTCGA**CTTA**ATC**A-A**GGT**  
 Nema -----A**GCAGT**GATAAACAT**TAGGC**-AA**TAAGT**GA-AA**ACTTGA**CTTA**GTT**A-T**GGT**  
 Disp -----A**GCAGT**AATAAACAT**TAGGC**-AA**TAAGT**GT-AA**ACTTGA**CTTA**GTT**A-C**GGT**  
 Myaf -----A**GCAGT**AATTAACAT**TAGGC**-AA**TAAGT**GT-AA**ACTTGA**CTTA**ACT**A-C**GGT**  
 Lagu -----TTCA**GCAGT**GATAAATAT**TGAGA**-TA**TAAAC**GA-AA**GCTTGA**CTCA**GTT**A-A**AGC**  
 Trtr -----A**GCAGT**AATAAACAT**TAAGC**-CA**TAAGT**GC-CA**ACTTGA**CTTA**ATT**A-A**GAT**  
 Zucr -----CTCA**GCAGT**AATAAACAT**TAAGC**-CA**TAAGC**GT-CA**GCTTGA**CTTA**ATT**A-A**GAT**  
 Pxja -----CA**GCAGT**GATAAACAT**TAAGCCA**-**TAAGT**GC-AA**ACTTGA**CTTA**ATC**A-A**AGC**  
 Pxlo -----CTCA**GCAGT**GATAAACAT**TAAGC**-CA**TAAGT**GC-AA**ACTTGA**CTTA**ATC**A-A**AGC**  
 Pctr -----CTCA**GCAGT**AGTAGACAT**TAAAC**-CA**TAAGC**GC-AA**GCTTGA**CTTA**GTT**A-G**GGC**  
 Apsa -----A**GCAGT**GATAAACAT**TAAGC**-CA**TAAGT**GC-AA**ACTTGA**CTTA**GTT**A-C**AGC**  
 Cabe -----A**GCAGT**GATAAACAT**TAGGC**-AA**TTAGC**GA-AA**GCTTGA**CTTA**ATT**A-T**GGT**  
 Bzze -----A**GCAGT**GATAAACAT**TAAGC**-CA**TAAGT**GA-AA**ACTTGA**CTTA**GTT**A-A**GGC**  
 Siim -----A**GCAGT**GATAAACAT**TAAGC**-TA**TAAGT**GA-AA**ACTTGA**CTTA**GTT**A-A**AGT**  
 Ctru -----CA**GCAGT**GATAAACAT**TAAGTA**-**TAAGT**GA-AA**ACTTGA**CTTA**ATC**A-A**GGC**  
 Dpbr -----A**GCAGT**GATAAACAT**TAAGCCA**-**TAAGT**GA-AA**ACTCGA**CTTA**GTT**A-A**GGC**  
 Caki -----A**GCAGT**GATAAACTT**TTAGC**-TA**TAAGT**GA-AA**ACTTGA**CTCA**GTT**A-A**GGT**  
 Phja -----A**GCAGT**GAGAAAATT**TAAGC**-CA**TAAGT**GA-AA**GCTTGA**CTTA**GTT**A-A**GGT**  
 Brsp -----A**GCAGT**GATAAAAAT**TAAG**-**TA**TTTGA GC-AA**ACTTGA**CTTA**GTT**A-A**GAT**  
 Gamo -----A**GCAGT**GATAAAAATT**TAAGC**-CA**TAAGT**GA-AA**GCTTGA**CTTA**GTT**A-A**GGC**  
 Lolo -----A**GCAGT**GATAAAAATT**TAAGC**-CA**TAAGT**GA-AA**GCTTGA**CTTA**GTT**A-G**GGT**  
 Batr -----C**GCAGT**AGTTAATAT**TAGCAA**-**TGAGC**GA-AA**GCTTGA**CTTA**ATC**A-A**AGT**  
 Prmy -----CA**GCAGT**AGTTAATAT**TAGCAA**-**TGGGT**GA-AA**ACCTGA**CTTA**GTT**A-T**AGT**  
 Loli -----A**GCAGT**AATAAATAT**TAAGCCA**-**TGAGC**GA-AA**GCTCGA**CTTA**GCC**A-C**AGC**  
 Loam -----A**GCAGT**GATAAACAT**TAAGC**-CA**TAAGC**GA-AA**GCTTGA**CTTA**GTT**A-A**AGT**  
 Chab -----A**GCAGT**GATAAATAT**TAAGCAA**-**TAAGT**GA-AA**ACTTGA**CTTA**AT**A-G**GGC**  
 Chto -----A**GCAGT**GATAAATAT**TAAGCAA**-**TAAGT**GA-AA**ACTTGA**CTTA**AT**A-G**GGC**  
 Majo -----A**GCAGT**GACAGACAT**TAAGC**-CA**TTAGC**GA-AA**GCTTGA**CTTA**GTT**A-A**AGC**  
 Hlst -----A**GCAGT**GATAGACAT**TGAGC**-CA**TAAGT**GA-AA**GCTTGA**CTCA**ATC**A-G**GGT**  
 Clpe -----CCC**GCAGT**AATAAATAT**TAAGC**-AA**TAAGT**GA-AA**GCTTGA**CTTA**GCT**A-A**GGT**  
 Mlmr -----TCCA**GCAGT**AACAAACAT**TAAGC**-AA**TAAGT**GA-AA**ACTTGA**CTTA**GCC**A-A**GGC**  
 Cr cr -----A**GCAGT**GATTAACCT**TAAGC**-CA**TAAGT**GA-AA**ACTTGA**CTTA**GCC**A-C**GGC**  
 Muce -----A**GCAGT**GATTAACCT**TAAGC**-CA**TAAGT**GA-AA**ACTTGA**CTTA**GCC**A-C**GGC**  
 Bege -----A**GCAGT**GATAAATAT**TAAGCCA**-**TAAGT**GA-AA**ACTTGA**CTTA**GTT**A-G**AGT**  
 Mela -----A**GCAGT**GATAAACAT**TAAGC**-TA**TAAGT**GA-AA**ACTTGA**CTTA**GTT**A-A**AGC**  
 Hats -----A**GCAGT**GATAAACAT**TAAGCCA**-**TAAGT**GA-AA**ACTTGA**CTTA**GTT**A-A**AGC**  
 Or la -----CTCA**GCAGT**GATAGACAT**TAAGC**-AA**TAAGT**GA-AA**ACTTGA**CTTA**ATT**A-A**GGC**

Cosa -----AGCAGTGATAAATATTAAGCAA-TAAGTGA-AAACTTGACTTAGTTA-AGC  
 Exsp -----CAAGCAGTGATAAACATTAAGCTA-TAAGTGA-AAACTTGACTTAGTTA-AGC  
 Depa -----AGCAGTGATAAATATTAAGCAA-TAAGTGA-AAACTTGACTTAGTTA-AGC  
 Rima -----CGCAAGCAGTGATAAACCTTAAGC-AA-TAAGTGT-AAAGCTTGACTTAGTTA-AGC  
 Fuol -----AGCAGTAATAAATATTAAGCCA-TAAGTGA-AAACTTGACTTAGTTA-AGC  
 Gmaf -----CAAGCAGTGATAAACATTAAGCAA-TAAGTGA-AAACTTGACTTAGTTA-AGC  
 Xeei -----AGCAGTGATAAACATTAAGCCA-TAAGTGT-AAACTTGACTTAGTTA-AGC  
 Pros -----AGCAGTAATAAACATTAAGC-TAAGTGA-AAACTTGACTTAGTTA-AGC  
 Scmi -----CTCAAGCAGTGATAAACATTAAGC-CA-TAAGTGA-AAACTTGAATCAGTTA-AGC  
 Rolo -----AGCAGTGATAAACATTAAGC-CA-TAAGTGA-AAACTTGACTTAGTTA-AGC  
 Cere -----AGCAGTGATAAACATTAAGC-CA-TAAGTGA-AAACTTGACTTAGTTA-AGC  
 Daga -----CTCAAGCAGTAATAAACATTAAGC-CA-TAAGC-GA-AAAGCTCGACTTAGTTA-AGC  
 Anco -----AGCAGTGATAAACATTAAGC-CA-TAAGTGA-AAACTTGACTTAGTTA-AGC  
 Dmve -----AGCAGTGATAGACATTAAGC-CA-TAAGTGA-AAACTTGACTTAGTTA-AGC  
 Dmar -----CAAGCAGTGATAGACCTTAAGCTA-TAAGTGA-AAACTTGACTTAGTTA-AGC  
 Anka -----AGCAGTGATAAACATTAAGCCA-TAAGTGA-AAACTTGACTTAGTTA-AGC  
 Moja -----CAAGCAGTGATAAACATTAAGCCA-TGAGTGA-AAAGCTCGACTTAGTTA-AGC  
 Hoja -----AGCAGTGATAAACATTAAGC-CA-TAAGTGA-AAACTTGACTTAGTTA-AGC  
 Bede -----AGCAGTGATAAACATTAAGC-CA-TAAGTGA-AAACTTGACTTAGTTA-AGC  
 Bsp -----AGCAGTGATAAACATTAAGC-TAAGTGA-AAACTTGACTTAGTTA-AGC  
 Mysp -----AGCAGTGATAAACATTAAGC-AA-TAAGTGA-AAACTTGACTTAGTTA-AGC  
 Osja -----CTCAAGCAGTGATAAATATTAAGC-AA-TAAGTGA-AAACTTGACTTAGTTA-AGC  
 Sgro -----AGCAGTGATAAATATTAAGC-AA-TAAGTGA-AAACTTGACTTAGTTA-AGC  
 Pzpa -----AGCAGTGTAAACATTAAGC-CA-TAAGTGA-AAACTTGACTTAGTTA-AGC  
 Zeja -----AGCAGTAATAAAAATTAAGC-CA-TAAGTGA-AAACTTGACTTAGTTA-AGC  
 Znne -----CAAGCAGTAGTAAATATTAAGCCA-TAAGTGA-AAACTTGACTTAGTTA-AGC  
 Zefa -----TTCAAGCAGTAATAAATATTAAGC-CA-TAAGTGA-AAAGCTTGACTTAGTTA-AGC  
 Acni -----AGCAGTGATAAAAATTAAGCTA-TAAGTGA-AAACTTGACTTAGTTA-AGC  
 Ncrh -----AGCAGTGATAAAAATTAAGC-TAAGTGA-AAACTTGACTTAGTTA-AGC  
 Agca -----CTCAAGCAGTGACAGACATTAAGC-CA-TAAGTGA-AAACTTGACTTAGTTA-AGC  
 Hydy -----TTCAAGCAGTGACAGACATTAAGC-CA-TAAGTGA-AAACTTGACTTAGTTA-AGC  
 Gsac -----TTCAAGCAGTGACAAACATTAAGC-TAAGTGA-AAACTTGACTTAGTTA-AGC  
 Pevo -----AGCAGTGATAGACATTAAGC-AA-TAAGTGA-AAACTTGACTTAGTTA-AGC  
 Hiku -----AGCAGTGATAAACATTAAGC-CA-TAAGTGT-AAACTTGACTTAGTTA-AGC  
 Inpa -----AGCAGTAACAAACATTAAGCCA-TAAGTGA-AAACTTGAACCTAGTTA-AGC  
 Auch -----CTCAAGCAGTGATTAACCTTAAGC-AA-TAAGC-GA-AAAGCTTGAACCTAGTTA-AGC  
 Fico -----TTCAAGCAGTGATAAACATTAAGC-AA-TGAGC-GA-AAAGCTCGACTTAGTTA-AGC  
 Macs -----CTCAAGCAGTGATAGACATTAAGC-TAAGTGA-AAACTTGACTTAGTTA-AGC  
 Moal -----ACCAAGCAGTGATAAACATTAAGC-CA-TAAGTGA-AAACTTGACTTAGTTA-AGC  
 Syma -----ATCAAGCAGTAATAAACCTTAAGC-CA-TAAGTGA-AAACTTGACTTAGTTA-AGC  
 Maf r -----CTCAAGCAGTGATAAACATTAAGCC-AA-TAAGTGA-AAACTTGAACCTAGTTA-AGC  
 Dcpe -----AGCAGTGATAAACCTTAAGC-TAAGTGA-AAACTTGACTTAGTTA-AGC  
 Dct i -----AGCAGTGATAAACCTTAAGC-TAAGTGA-AAACTTGACTTAGTTA-AGC  
 Hehi -----CAAGCAGTGATAAACATTAAGCCA-TAAGTGA-AAACTTGACTTAGTTA-AGC  
 Stam -----AGCAGTGATAAACATTAAGC-CA-TAAGTGA-AAACTTGACTTAGTTA-AGC  
 Hogi -----CTCAAGCAGTGATAAATATTAAGC-CA-TAAGTGA-AAACTTGAATTAGTTA-AGC  
 Erzo -----CAAGCAGTGATAAACATTAAGCCA-TAAGTGA-AAACTTGACTTAGTTA-AGC  
 Hxot -----CAAGCAGTGATAAACATTAAGCCA-TAAGTGA-AAACTTGACTTAGTTA-AGC  
 Core -----AGCAGTGATAAACATTAAGC-CA-TAAGTGA-AAACTTGACTTAGTTA-AGC  
 Apve -----CTCAAGCAGTGACAAACATTAAGC-CA-TAAGTGA-AAACTTGACTTAGTTA-AGC  
 Lat j -----AGCAGTGATAGACTTAAGC-TAAGTGA-AAACTTGACTTAGTTA-AGC  
 Laja -----AGCAGTGATAGACATTAAGC-CA-TAAGTGA-AAACTTGACTTAGTTA-AGC



Syja -----AGCAGTGATAAACATTAAGC-CATAAGTGA-AAACTTGACTTAGTTA-A-AGC  
 Epme -----AGCAGTGATAGACATTAAGCCAATGAGTGC-AAACTTGACTTAGTTA-TGGT  
 Grse -----AGCAGTGATAAACATTAAGC-CATGAGTGA-AAACTTGACTTAGTTA-A-AGC  
 Clja -----AGCAGTGACAAATATTAAGCCA-TAAGTGT-AAACTTGACTTAGTTA-CAGC  
 Ogcy -----AGCAGTGATAAACATTAAGC-TATAAGTGA-AAACTTGACTTAGTCA-A-AGC  
 Plna -----AGCAGTGATAAATATTAAGC-CATAAGTGA-AAACTTGACTTAGTTA-A-TGC  
 Lema -----AGCAGTGATAAACATTAAGC-CATAAGTGA-AAACTTGACTTAGTTA-A-AGC  
 Etzo -----CAAGCAGTGATAAACATTAAGCCA-TAAGTGA-AAACTTGACTTAGTTA-A-AGC  
 Apse -----AGCAGTGATAAACATTAAGC-CATAAGC GA-AA GCTTGACTTAGTTA-A-AGC  
 Epde ----CTCAAGCAGTGATAGACCTTAAGC-CATGAGTGA-AAACTCGACTTAGTCA-A-AGC  
 Slja ----CTCAAGCAGTGATAGACATTAAGC-TATAAGTGA-AAACTTGACTTAGTTA-A-AGC  
 Bsja -----AGCAGTGGTAAATATTAAGC-CATAAGTGA-AAACTTGACTTAGTTA-A-AGC  
 Ecna -----AGCAGTGATAAATATTAAGC-CATAAGTGA-AA GCTTGACTTAGTTA-A-AGC  
 Cohi ----CCCAAGCAGTGATAAATTTTAAGC-CATAAGTGA-AAACTTGACTTAGTTA-A-AGC  
 Caar -----AGCAGTGATAAATATTAAGC-CATAAGTGA-AAACTTGACTTAGTTA-A-AGC  
 Came -----AGCAGTGATAAATATTAAGCCA-TAAGTGA-AAACTTGACTTAGTTA-A-AGC  
 Mema ----CTCAAGCAGTGACAGACATTAAGC-CATAAGTGA-AAACTTGACTTAGTCA-A-AGC  
 Lenu -----AGCAGTAACAAACATTAAGC-AAATAAGC GA-AA GCTTGACTTAGTTA-A-TAGC  
 Plma -----AGCAGTGATAAACCTTAAGCTA-TAAGTGA-AAACTTGACTTAGTTA-A-AGC  
 Emst -----AGCAGTGATAGACATTAAGC-CATAAGTGA-AAACTTGACTTAGTCA-A-AGC  
 Ptti -----AGCAGTGATAAACATTAAGC-CATAAGTGA-AAACTTGACTTAGTTA-A-AGC  
 Losu -----CAAGCAGTGATAAACATTAAGCAA-TAAGTGA-AA GCTTGACTTAGTTA-TGGT  
 Geoy -----AGCAGTGATAGATATTAAGCCA-TAAGTGA-AAACTTGACTTAGTTA-A-AGT  
 Dipi -----AGCAGTGATAAACATTAAGC-CATAAGTGA-AAACTTGACTTAGTCA-A-AGC  
 Pama -----AGCAGTGATAAACATTAAGCA-TATAAGTGA-AAACTTGACTTAGTCA-A-AGC  
 Leob ----CAAGCAGTGATTAATATTAAGCCA-TAAGTGA-AAACTTGACTTAGTTA-A-GAGC  
 Neba -----AGCAGTAGTAAACATTAAGC-TATAAGC GA-AA GCTTGACTTAGTTA-A-GAGC  
 Pdpi ----GTCAGCAGTGATAAACATTAAGC-CATGAGTGA-AAACTTGACTTAGTTA-A-AGC  
 Nimi ----TTCAAGCAGTGATAAACCTTAAGCC-AATAAGTGA-AAACTTGACTTAGTTA-A-AGC  
 Uptr -----AGCAGTGACAGACATTAAGCCA-TAAGTGA-AA GCTTGACTTAGTTA-A-AGC  
 Pesc -----CAAGCAGTGATAAACATTAAGCAA-TAAGC GA-AA GCTTGACTTAGTTA-A-TGA  
 Baar -----AGCAGTGATAGACATTAAGC-CATAAGTGA-AAACTTGACTTAGTCTTAAGC  
 Moar ----CAAGCAGTGATAGACATTAAG-CCATAAGTGA-AAACTTGACTTAGTCA-A-AGC  
 Toja ----CAAGCAGTGATAGACATTAAGCCA-TAAGTGA-AAACTTGACTTAGCCA-A-AGC  
 Chau ----TCCAAGCAGTGATAGATTTTAAGCC-AATAAGTGA-AAACTTGACTTAGTTA-A-TGC  
 Chse -----AGCAGTGATAAACATTAAGC-CATAAGTGA-AAACTTGACTTAGTTA-A-AGC  
 Enar -----AGCAGTGATAGACATTAAGCCA-TAAGTGA-AAACTTGACTTAGTCA-A-AGC  
 Hpty ----CTCAAGCAGTGATAAACATTAAGC-CATAAGTGA-AAACTTGACTTAGTCA-A-AGC  
 Nana -----AGCAGTGATAAACATTAAGCTA-TAAGTGA-AAACTTGACTTAGTTA-A-AGC  
 Mcst ----TCCAAGCAGTGATAGACATTAAGC-TATGAGTGA-AAACTTGACTTAGTCA-A-AGT  
 Rhox ----TTCAAGCAGTGATAAACATTAAGC-AAATAAGTGA-AAACTTGACTTAGTTA-A-AGC  
 Opfa -----AGCAGTGATAGACATTAAGC-TATAAGTGA-AAACTTGACTTAGTCA-A-AGC  
 Paar -----AGCAGTGATAAACATTAAGC-TATGAGTGA-AAACTTGACTTAGTTA-A-AGA  
 Gozo -----AGCAGTGATAAACATTAAGC-CATAAGTGA-AAACTTGACTTAGTTA-A-AGC  
 Ackr -----AGCAGTGATAAATATTAAGC-CATGAGTGA-AAACTTGACTTAGTTA-A-AGC  
 Elev -----AGCAGTGATAAATATTAAGC-CATAAGTGA-AAACTTGACTTAGTTA-A-AGC  
 Trdu -----AGCAGTGATAGACATTAAGC-CATAAGTGA-AAACTTGACTTAGTTA-A-AGC  
 Amoc -----AGCAGTGATAGATATTAAGCCA-TAAGTGA-AAACTTGACTTAGTTA-A-AGC  
 Hame -----AGCAGTGACAAACATTAAGC-CATGAGTGA-AAACTTGACTTAGTTA-GTGT  
 Chso -----AGCAGTGATAGACATTAAGC-AAATGAGTGA-AAACTCGACTTAGTTA-A-AGC  
 Lyto ----CTCAAGCAGTGATAAACATTAAGC-CATAAGTGA-AAACTTGACTTAGTTA-A-AGC  
 Encr -----AGCAGTGATAAACATTAAGC-CCATAAGTGA-AAACTTGACTTAGTCA-A-AGC

|      |           |        |           |         |     |       |       |        |       |     |      |      |
|------|-----------|--------|-----------|---------|-----|-------|-------|--------|-------|-----|------|------|
| Bvar | -----TTCA | GCAGTG | ATAGATTT  | TAAGC   | -CA | TAAGT | GA-AA | GCTTGA | ACTTA | GTA | G-AA | AGC  |
| Noco | -----A    | GCAGTG | ATAGATAT  | TAAGCCA | -TA | AGT   | GA-AA | ACTTGA | ACTTA | GTA | A-AA | AGC  |
| Chsp | -----TTCA | GCAGTG | GATAAAAAT | TAAGA   | -TA | TAAGT | GA-AA | ACTTGA | ACTTA | ATC | A-G  | GAC  |
| Arja | -----A    | GCAGTG | GATAAACAT | TAAGC   | -CA | TGAGT | GA-AA | ACTTGA | ACTTA | GTT | A-AA | AGC  |
| Pase | -----CA   | GCAGTG | GATAAACAT | TAAGCAA | -TA | AGC   | GA-AA | GCTTGA | ACTTA | GTT | A-T  | AGT  |
| Trel | -----A    | GCAGTG | GATTGACAT | TAAGT   | --A | TAACC | GA-AA | GTTTGA | ACTTA | GCA | A-C  | AGC  |
| Lifa | -----A    | GCAGTG | GACAGACAT | TAAAT   | -AA | TAAGT | GA-AA | ACTTGA | AATTA | GTT | A-G  | GGA  |
| Acur | -----A    | GCAGTG | GATTTATTT | TAAGC   | -TA | TGAGT | GT-AA | ACTTGA | ACTTA | GAT | A-AA | AGC  |
| Ampe | -----CTCA | GCAGTG | GATAGACAT | TAAGCC  | -A  | TAAGT | GA-AA | ACTTGA | ACTTA | GTC | A-AA | AGC  |
| Urja | -----A    | GCAGTG | GATAAATCT | TAAGCAA | -TA | AGT   | GA-AA | ACTTGA | ACTTA | GTT | A-G  | GGC  |
| Enet | -----CTCA | GCAGTG | GATAAACAT | TAAGC   | -GA | TGAGC | GA-AA | GCTCG  | ACTTA | ATT | A-G  | GGC  |
| Ptbr | -----CGCA | GCAGTG | GATAAATAT | TAAGC   | -AA | TAAGT | GA-AA | ACTTGA | ACTTA | ATT | A-G  | AGC  |
| Safa | -----A    | GCAGTG | GATAAATAT | TAAGCAA | -TA | AGT   | GA-AA | ACTTGA | ACTTA | GTT | ATA  | AGC  |
| Icae | -----CTCA | GCAGTG | GATAAACCT | TAAGC   | -TA | TAAGT | GA-AA | ACTTGA | ACTTA | GTT | A-AA | AGC  |
| Asmi | -----TTCA | GCAGTG | GATAAACAT | TAAGC   | -TA | TAGT  | GA-AA | ACTTGA | ACTTA | ATT | A-AA | GGC  |
| Foal | -----A    | GCAGTG | GATAAATAT | TAAGC   | -CA | TAAGT | GA-AA | ACTTGA | ACTTA | GCA | G-AA | CAGC |
| Drze | -----A    | GCAGTG | GTGACACAT | TAAGCTA | -T  | GAGT  | GT-AA | ACTCG  | ACTTA | ATT | A-T  | GGT  |
| Rhas | -----A    | GCAGTG | GATAGACAT | TAAGC   | -CC | TAAGT | GT-AA | ACTTGA | ACTTA | GTT | A-AA | AGC  |
| Elac | -----CTCA | GCAGTG | GATAGACAT | TAAGC   | -CA | TAGT  | GA-AA | ACTTGA | ACTTA | GTT | A-AA | GGC  |
| Kugu | -----A    | GCAGTG | GACAGACAT | TAAGC   | -CA | TAAGT | GA-AA | ACTTGA | ACTTA | GTT | A-AA | AGC  |
| Plor | -----TTCA | GCAGTG | GATAAACAT | TAAGC   | -CA | TAAGT | GA-AA | ACTCG  | ACTCA | GTC | A-AA | GGC  |
| Sgun | -----A    | GCAGTG | GATAAACAT | TAAGC   | -CA | TAAGT | GA-AA | ACTTGA | ACTTA | GTC | A-AA | AGC  |
| Zaco | -----A    | GCAGTG | GACAAACAT | TAAGC   | -CA | TAAGT | GA-AA | GCTTGA | ACTTA | GTT | A-AA | AGC  |
| Zbfl | -----A    | GCAGTG | GATAAACAT | TAAGCCA | -TA | AGT   | GA-AA | ACTTGA | ACTTA | GTC | A-AA | AGC  |
| Spba | -----A    | GCAGTG | GATAAACAT | TAAGC   | -CA | TGAGC | GA-AA | GCTTGA | ACTTA | GTT | A-AA | AGC  |
| Game | -----A    | GCAGTG | GATAAACCT | TAAGC   | -TA | TGAGT | GC-AA | ACTTGA | ACTTA | GTT | A-AA | AGC  |
| Thth | -----A    | GCAGTG | GATAAACCT | TAAGC   | -TA | TAAGT | GA-AA | ACTTGA | ACTTA | GTT | A-AA | AGC  |
| Xigl | -----CTCA | GCAGTG | GATAGATAT | TAAGC   | -TA | TAAGT | GA-AA | ACTTGA | ACTTA | GTT | A-AA | AGC  |
| Hyja | -----TTCA | GCAGTG | GATAAACCT | TAAGC   | -TA | TAAGT | GA-AA | ACTTGA | ACTTA | GTT | A-AA | AGC  |
| Psan | -----CA   | GCAGT  | AATAAACCT | TAAGCTA | -T  | GAGT  | GA-AA | ACTTGT | CAAA  | GTC | A-AA | AGC  |
| Cupa | -----A    | GCAGTG | GATAAACCT | TAAGC   | -TA | TAAGT | GA-AA | ACTTGA | ACTTA | GTT | A-AA | AGC  |
| Mpch | -----A    | GCAGTG | GATAAATAT | TAAGC   | -CA | TGAGT | GA-AA | ACTTGA | ACTTA | GTT | A-AA | AGT  |
| Char | -----CTCA | GCAGTG | GATAAACAT | TAAGC   | -CA | TAAGT | GA-AA | GCTTGA | ACTTA | GTC | A-AA | GGC  |
| Pser | -----A    | GCAGTG | GAGTAACAT | TAAAC   | -TA | TAAGT | GC-AA | ACTTGA | ACTTA | GTT | A-AA | AGC  |
| Prol | -----A    | GCAGTG | GATAAATAT | TAAGC   | -CA | TAAGT | GC-AA | ACTTGA | ACTTA | GTT | A-AA | GGT  |
| Plbi | -----CTCA | GCAGTG | GATAAATAT | TAAGC   | -CA | TAAGT | GA-AA | ACTTGA | ACTTA | GTT | A-AA | GGT  |
| Calu | -----A    | GCAGTG | GATTAACAT | TAAGC   | -CA | TGAGC | GA-GA | GCTCT  | ACTCA | GTT | A-G  | AGT  |
| Papa | -----T    | GCAGTG | GATCAACAT | TAAGC   | -AA | TGAGT | GA-AA | ACTCG  | ACTTA | GCT | A-AA | AGC  |
| Sufr | -----CTCA | GCAGTG | GACAAACAT | TAAGC   | -CA | TGAGT | GA-AA | ACTTGA | ACTTA | GTT | A-G  | GGT  |
| Stci | -----CA   | GCAGTG | GATAAACAT | TAAGCCA | -TA | AGT   | GA-AA | GCTTGA | ACTTA | GTC | A-AA | GGT  |
| Taru | -----TTCA | GCAGTG | GATAAACAT | TAAGC   | -CA | TAAGT | GA-AA | ACTTGA | ACTTA | GTC | A-T  | GAT  |
| Rala | -----CA   | GCAGTG | GATAAACAT | TAAGCCA | -TA | AGT   | GA-AA | ACTTGA | ACTTA | GTC | A-C  | AGC  |

\* \* \*                    \*    \*\*                    \*                    \*

|      | 4'        | HVR   | 16    | A      | 17  | B     | A'  | B'     | 17' | 16'   |       |       |    |     |
|------|-----------|-------|-------|--------|-----|-------|-----|--------|-----|-------|-------|-------|----|-----|
| Scca | CGACA     | ----- | GAGTT | GGTAAA | -TC | TCGTG | CCA | GCCACC | -GC | GGTTA | TACGA | GT--- | GA | CTC |
| Muma | CGACA     | ----- | GAGTT | GGTTAA | -TC | TCGTG | CCA | GCCACC | -GC | GGTTA | TACGA | GT--- | AA | CTC |
| Erca | TAATATA   | ----  | GAGTC | GGTAAA | -AC | TCGTG | CCA | GCCACC | -GC | GGTTA | TACGA | GA--- | GA | CTC |
| Pose | TAATA     | ----- | GAGCC | GGTAAA | -AC | TCGTG | CCA | GCCACC | -GC | GGTTA | TACGA | GA--- | GG | CTC |
| Actr | TAAGA     | ----- | GGGCC | GGTAAA | -AC | TCGTG | CCA | GCCACC | -GC | GGTTA | TACGA | GA--- | GG | CCC |
| Scal | TAAGA     | ----- | GGGCC | GGTAAA | -AC | TCGTG | CCA | GCCACC | -GC | GGTTA | TACGA | GA--- | GG | CCC |
| Posp | TAAGA     | ----- | GGGCC | GGTAAA | -AC | TCGTG | CCA | GCCACC | -GC | GGTTA | TACGA | GA--- | GG | CCC |
| Atsp | TAAGA     | ----- | GAGTC | GGTCAA | -AC | TCGTG | CCA | GCCACC | -GC | GGTTA | TACGA | GA--- | GA | CTC |
| Leoc | TAAGA     | ----- | GAGCC | GGTAAA | -AC | TCGTG | CCA | GCCACC | -GC | GGTTA | TACGA | GA--- | GG | CTC |
| Amca | TAAGA     | ----- | GGGCC | GGTAAA | -AC | TCGTG | CCA | GCCACC | -GC | GGTTA | TACGA | GA--- | GG | CCC |
| Osbi | TAAGA     | ----- | GGGTC | GGTTAA | -AC | TCGTG | CCA | GCCGCC | -GC | GGTTA | TACGA | GA--- | GA | CCC |
| Pabu | AAACA     | ----- | GAGCC | GGTAAA | -AC | TCGTG | CCA | GCCACC | -GC | GGTTA | TACGA | GA--- | GG | CTC |
| Hial | TAAGA     | ----- | GGGCC | GGTAAA | -AC | TCGTG | CCA | GCCACC | -GC | GGTTA | TACGA | GA--- | GG | CCC |
| Elha | CAAGA     | ----- | GGGCC | GGTAAA | -TC | TCGTG | CCA | GCCACC | -GC | GGTTA | TACGA | GA--- | GG | CCC |
| Mlcy | TACAA     | ----- | GGACT | GGTAAA | -TC | TCGTG | CCA | GCCACC | -GC | GGTTA | TACGA | GA--- | GG | TCC |
| Algl | CAAGA     | ----- | GAGCC | GGTAAA | -AC | TCGTG | CCA | GCCACC | -GC | GGTTA | TACGA | GA--- | GG | CTC |
| Ptgi | CAAGA     | ----- | GAGCC | GGTAAA | -AC | TCGTG | CCA | GCCACC | -GC | GGTTA | TACGA | GA--- | GG | CTC |
| Alaf | CAAGA     | ----- | GAGCC | GGTAAA | -AC | TCGTG | CCA | GCCACC | -GC | GGTTA | TACGA | GA--- | GG | CTC |
| Nock | CAAGA     | ----- | GAGCC | GGTAAA | -AC | TCGTG | CCA | GCCACC | -GC | GGTTA | TACGA | GA--- | GG | CTC |
| Anja | CAAAA     | ----- | GAGCC | GGTAAA | -AC | TCGTG | CCA | GCCACC | -GC | GGTTA | TACGA | GG--- | GG | CTC |
| Gyki | TGACA     | ----- | GGGCC | GGTAAA | -AC | TCGTG | CCA | GCAACC | -GC | GGTTA | CACGA | GA--- | GG | CCC |
| Syka | CAATTA    | ----  | GAGCC | GGTAAA | -AC | TCGTG | CCA | GCCACC | -GC | GGTTA | TACGA | GG--- | GG | CTC |
| Opma | TAATAAA   | ----  | GAGCC | GGTAAA | -AC | TCGTG | CCA | GCCACC | -GC | GGTTA | TACGA | GA--- | GG | CTC |
| Comy | CAACA     | ----- | GAGCC | GGTAAA | -AT | TCGTG | CCA | GCCACC | -GC | GGTTA | TACGT | AT--- | GA | CTC |
| Sasp | TAATTA    | ----  | GGGCC | GGTAAA | -AC | TCGTG | CCA | GCCACC | -GC | GGTTA | TACGA | GA--- | GG | CTC |
| Eupe | TAACCT    | ----  | AAGCC | GGTAAA | -AT | TCGTG | CCA | GCCACC | -GC | GGTTA | TACGA | AA--- | GG | CTT |
| Enja | TAAGA     | ----- | GGGCC | GGTAAA | -AC | TCGTG | CCA | GCCACC | -GC | GGTTA | TACGA | GA--- | GA | CCC |
| Same | TAAGA     | ----- | GGGCC | GGTAAA | -AC | TCGTG | CCA | GCCACC | -GC | GGTTA | TACGA | GG--- | GA | CCC |
| Chch | TAATA     | ----- | GAGCC | GGTTAA | -AC | TCGTG | CCA | GCCACC | -GC | GGTTA | TACGA | GA--- | GG | CTC |
| Grgr | TAGTTCATA | ----  | GGGCC | GGTAAA | -AC | TCGTG | CCA | GCCACC | -GC | GGTTA | TACGA | GA--- | GG | CTC |
| Caau | TAAGA     | ----- | GGGCC | GGTAAA | -AC | TCGTG | CCA | GCCACC | -GC | GGTTA | GACGA | GA--- | GG | CCC |
| Cyca | TAAGA     | ----- | GGGCC | GGTAAA | -AC | TCGTG | CCA | GCCACC | -GC | GGTTA | GACGA | GA--- | GG | CCC |
| Dare | AAAGA     | ----- | GAGCC | GGTAAA | -AC | TCGTG | CCA | GCAACC | -GC | GGTTA | AACGA | GA--- | GG | CTC |
| Cost | TAAGA     | ----- | GGGCC | GGTAAA | -AC | TCGTG | CCA | GCCACC | -GC | GGTTA | TACGA | GA--- | GG | CCC |
| Leec | TAAGA     | ----- | GGGCC | GGTAAA | -AC | TCGTG | CCA | GCCACC | -GC | GGTTA | TACGA | GA--- | GG | CCC |
| CrIa | TAAGA     | ----- | GGGCC | GGTAAA | -AC | TCGTG | CCA | GCCACC | -GC | GGTTA | TACGA | GA--- | GG | CCC |
| Clmc | TAAGA     | ----- | GGGTC | GGTAAA | -AC | TCGTG | CCA | GCCACC | -GC | GGTTA | TACGA | GA--- | GA | CCC |
| Phin | TATAAA    | ----  | GGGTC | GGTAAA | -AC | TCGTG | CCA | GCCACC | -GC | GGTTA | TACGA | GA--- | GA | CCC |
| Icpu | TATTA     | ----- | GGGCC | GGTAAA | -AT | TCGTG | CCA | GCCACC | -GC | GGTTA | TACGA | AA--- | GA | CCC |
| Psto | TAATA     | ----- | GGGCC | GGTAAA | -AT | TCGTG | CCA | GCCACC | -GC | GGTTA | TACGA | AA--- | GA | CCC |
| Cora | TAATA     | ----- | GAGTC | GGTAAA | -AT | TCGTG | CCA | GCCACC | -GC | GGTTA | TACGA | AA--- | GA | CTC |
| Eisp | TAAGA     | ----- | GGGCC | GGTAAA | -AC | TCGTG | CCA | GCCACC | -GC | GGTTA | TACGA | GA--- | GG | CCC |
| Apal | TAACA     | ----- | GGGCC | GGTAAA | -TC | TCGTG | CCA | GCCACC | -GC | GGTTA | TACGA | AA--- | GA | CCC |
| EsLu | TAATA     | ----- | GGGCC | GGTAAA | -AC | TCGTG | CCA | GCCACC | -GC | GGTTA | TACGA | GA--- | GG | CCC |
| Dape | TTAGA     | ----- | GGGCC | GGTAAA | -AC | TCGTG | CCA | GCCACC | -GC | GGTTA | TACGA | GA--- | GG | CCC |
| Glse | AAACA     | ----- | GGGTC | GGTAAA | -AC | TCGTG | CCA | GCCACC | -GC | GGTTA | TACGA | GA--- | GA | CCC |
| Naar | AAACA     | ----- | GGGCC | GGTAAA | -AC | TCGTG | CCA | GCCACC | -GC | GGTTA | TACGA | GA--- | GG | CCC |
| Baoc | AAGCA     | ----- | GGGCC | GGTAAA | -AC | TCGTG | CCA | GCCACC | -GC | GGTTA | TACGA | GA--- | GG | CCC |
| Opso | AAATA     | ----- | GAGTC | GGTAAA | -AC | TCGTG | CCA | GCCACC | -GC | GGTTA | TACGA | GA--- | GA | CTC |
| Alte | TAAGA     | ----- | GGGCC | GGTAAA | -AC | TCGTG | CCA | GCCACC | -GC | GGTTA | TACGA | GA--- | GG | CCC |
| Plap | TAAGA     | ----- | GGGCC | GGTAAA | -AC | TCGTG | CCA | GCCACC | -GC | GGTTA | TACGA | GA--- | GG | CCC |

|      |     |        |       |       |     |        |     |       |     |     |     |     |       |       |       |     |       |
|------|-----|--------|-------|-------|-----|--------|-----|-------|-----|-----|-----|-----|-------|-------|-------|-----|-------|
| Plal | TTT | TTA    | ----- | GGGCC | GGT | TAA    | -TC | TCGTC | CCA | GCC | ACC | -GC | GGTTA | TACGA | GT    | --- | GGCCC |
| Sami | TTT | TTA    | ----- | GGGCC | GGT | TAA    | -TC | TCGTC | CCA | GCC | ACC | -GC | GGTTA | TACGA | GT    | --- | GGCCC |
| Rere | TTT | TTA    | ----- | GGGCC | GGT | TAA    | -TC | TCGTC | CCA | GCC | ACC | -GC | GGTTA | TACGA | GT    | --- | GGCCC |
| Gama | TA  | AGA    | ----- | GGGCC | GGT | AAA    | -AC | TCGTC | CCA | GCC | ACC | -GC | GGTTA | TACGA | GA    | --- | GGCCC |
| Onmy | TA  | AGA    | ----- | GGGCC | GGT | AAA    | -AC | TCGTC | CCA | GCC | ACC | -GC | GGTTA | TACGA | GA    | --- | GACCC |
| Sasa | TA  | AGA    | ----- | GGGCC | GGT | AAA    | -AC | TCGTC | CCA | GCC | ACC | -GC | GGTTA | TACGA | GA    | --- | GGCCC |
| Cola | TA  | AGA    | ----- | GGGCC | GGT | AAA    | -AC | TCGTC | CCA | GCC | ACC | -GC | GGTTA | TACGA | GA    | --- | GGCCC |
| Dita | TA  | ACA    | ----  | GGGCC | GGT | AAA    | -AC | TCGTC | CCA | GCC | ACC | -GC | GGTTA | TACGA | GA    | --- | GGCCC |
| Gogr | TC  | CTAA   | ----  | GGGCC | GGT | TAA    | -GC | TCGTC | CCA | GCC | GCC | -GC | GGTTA | TACGA | AA    | --- | GACCC |
| Chsl | TTT | TTA    | ----- | GGGTC | GGT | AAA    | -AC | TCGTC | CCA | GCC | ACC | -GC | GGTTA | TACGA | GA    | --- | GACTC |
| Atja | CA  | ACA    | ----- | GGGCC | GGT | AAA    | -AC | TCGTC | CCA | GCC | ACC | -GC | GGTTA | TACGA | GA    | --- | GGCCC |
| Iido | CA  | ACA    | ----- | GGGCC | GGT | AAA    | -AC | TCGTC | CCA | GCC | ACC | -GC | GGTTA | TACGA | GA    | --- | GGCCC |
| Auja | AA  | ATA    | ----- | GGGCC | GGT | AAA    | -AC | TCGTC | CCA | GCC | ACC | -GC | GGTTA | TACGA | GA    | --- | GACCC |
| Chag | TT  | AACA   | ----  | GGGCC | GGT | TAA    | -TC | TCGTC | CCA | GCC | ACC | -GC | GGTTA | TACGE | GCA   | --- | GGCCC |
| Hami | GT  | TAA    | ----- | GGGCC | GGT | TAA    | -AC | TCGTC | CCA | GCC | ACC | -GC | GGTTA | TACGA | GA    | --- | GGCCC |
| Saun | AA  | TAAA   | ----- | GGGCC | GGT | AAA    | -AC | TCGTC | CCA | GCC | ACC | -GC | GGTTA | TACGA | GA    | --- | GGCCC |
| Nema | TA  | TCTTTT | TGA   | GGGCC | GGT | AAA    | -AC | TCGTC | CCA | GCC | ACC | -GC | GGTTA | TACGA | GA    | --- | GGCCC |
| Disp | TA  | TAGA   | ----  | GGGCC | GGT | AAACAC |     | TCGTC | CCA | GCC | ACC | -GC | GGTCA | AACGA | GCCAG |     | CGCCC |
| Myaf | TA  | AAA    | ----- | GGGCC | GGT | AAA    | -AC | TCGTC | CCA | GCC | ACC | -GC | GGTCA | TACGA | GTGAT |     | AGCCC |
| Lagu | CC  | CA     | ----- | GGGCC | GGT | AAA    | -AC | TCGTC | CCA | GCC | ACC | -GC | GGTTA | TACGA | GA    | --- | GGCCC |
| Trtr | CA  | ATA    | ----- | GGGCC | GGT | AAA    | -AC | TCGTC | CCA | GCC | ACC | -GC | GGTTA | TACGA | GA    | --- | GGCCC |
| Zucr | CA  | CTA    | ----- | GGACC | GGT | AAA    | -AC | TCGTC | CCA | GCC | ACC | -GC | GGTTA | TACGA | GA    | --- | GGTCC |
| Pxja | TT  | AGA    | ----- | GGGCC | GGT | AAA    | -AC | TCGTC | CCA | GCC | ACC | -GC | GGTTA | TACGA | GA    | --- | GGCCC |
| Pxlo | TT  | AGA    | ----- | GGGCC | GGT | AAA    | -AC | TCGTC | CCA | GCC | ACC | -GC | GGTTA | TACGA | GA    | --- | GGCCC |
| Pctr | TA  | ACA    | ----- | GGGCC | GGT | AAA    | -AC | TCGTC | CCA | GCC | ACC | -GC | GGTTA | TACGA | GC    | --- | GGCTC |
| Apsa | AA  | CCA    | ----- | GAGCC | GGT | AAA    | -AC | TCGTC | CCA | GCC | ACC | -GC | GGTTA | TACGA | GC    | --- | GACTC |
| Cabe | TA  | AGA    | ----- | GGGCC | GGT | AAA    | -TC | TCGTC | CCA | GCC | ACC | -GC | GGTTA | TACGE | GAA   | --- | GGCCC |
| Bzze | TA  | ACA    | ----- | GGGCC | GGT | AAA    | -AC | TCGTC | CCA | GCC | ACC | -GC | GGTTA | TACGA | GTA   | --- | GGCCC |
| Siim | TAT | TAA    | ----- | GGGCC | GGT | AAA    | -TC | TCGTC | CCA | GCT | ACC | -GC | GGTTA | CACGE | GGG   | --- | AGCCC |
| Ctru | TA  | ACA    | ----- | GGGCC | GGT | AAA    | -AC | TCGTC | CCA | GCC | ACC | -GC | GGTTA | TACGA | GA    | --- | GACCC |
| Dpbr | TA  | ACA    | ----- | GGGCC | GGT | AAA    | -AC | TCGTC | CCA | GCC | ACC | -GC | GGTTA | TACGA | GA    | --- | GACCC |
| Caki | TA  | AAA    | ----- | GGGTC | GGT | AAA    | -CC | TCGTC | CCA | GCC | ACC | -GC | GGTTA | AACGE | GA    | --- | GACCC |
| Phja | TA  | AGA    | ----- | GAGCC | GGT | AAATAC |     | TCGTC | CCA | GCC | ACC | -GC | GGTTA | AACGA | GAA   | --- | GGCTC |
| Brsp | AA  | ACA    | ----- | GAACC | GGT | TAA    | -AC | TCGTC | CCA | GCC | ACC | -GC | GGTTA | TACGA | GG    | --- | GGTTC |
| Gamo | AA  | AGA    | ----- | GGGCC | GGT | AAA    | -AC | TCGTC | CCA | GCC | ACC | -GC | GGTTA | TACGA | GA    | --- | GGCCC |
| Lolo | TA  | AGA    | ----- | GGGCC | GGT | AAA    | -AC | TCGTC | CCA | GCC | ACC | -GC | GGTTA | TACGA | GA    | --- | GGCCC |
| Batr | AA  | AAAA   | ----  | TGTGG | GCC | AAT    | -GC | TCGTC | CCA | GCC | ACC | -GC | GGTTA | TACGE | G     | --- | CCACC |
| Prmy | AA  | TTTA   | ----  | TAGTI | GGT | CAA    | -AT | TCGTC | CCA | GCC | ACC | -GC | GGTTA | CACGA | AAT   | --- | AACTA |
| Loli | CC  | AAGA   | ----  | GGGCC | GGT | AAA    | -CC | TCGTC | CCA | GCC | ACC | -GC | GGTTA | TACGA | GG    | --- | GGCCC |
| Loam | TA  | AGA    | ----- | GGGCC | GGT | AAA    | -AC | TCGTC | CCA | GCC | ACC | -GC | GGTTA | TACGA | GA    | --- | GGCCC |
| Chab | TA  | ATTGA  | ----  | GGGCC | GGT | AAA    | -CC | TCGTC | CCA | GCC | ACC | -GC | GGTTA | TACGA | AG    | --- | GGCCC |
| Chto | TA  | ATTAA  | ----  | GGGCC | GGT | AAA    | -CC | TCGTC | CCA | GCC | ACC | -GC | GGTTA | TACGA | AG    | --- | GGCCC |
| Majo | TA  | AGA    | ----- | GGGCC | GGT | AAA    | -AC | TCGTC | CCA | GCC | ACC | -GC | GGTTA | TACGA | GA    | --- | GGCCC |
| Hlst | TA  | AGA    | ----- | GGGTC | GGT | AAA    | -AC | TCGTC | CCA | GCT | ACC | -GC | GGTTA | TACGA | GA    | --- | GACCC |
| Clpe | TC  | AGA    | ----- | GGGCA | GGT | AAAAAC |     | TTGTC | CCA | GCC | ACC | -GC | GGTTA | CACIT | GT    | --- | TGCCC |
| Mlmr | TA  | AGA    | ----- | GGGCC | GGT | AAA    | -AC | TCGTC | CCA | GCC | ACC | -GC | GGTTA | TACGE | GAT   | --- | GGCCC |
| Crcr | TA  | ATA    | ----- | GGGCC | GGT | AAA    | -TC | TCGTC | CCA | GCC | ACC | -GC | GGTTA | TACGA | AA    | --- | GACCC |
| Muce | TA  | ATA    | ----- | GGGCC | GGT | AAA    | -TC | TCGTC | CCA | GCC | ACC | -GC | GGTTA | TACGA | AA    | --- | GACCC |
| Bege | TT  | AAA    | ----- | GGGCC | GGT | AAA    | -AC | TCGTC | CCA | GCC | ACC | -GC | GGTTA | TACGA | GA    | --- | GGCCC |
| Mela | TA  | AGA    | ----- | GAGCC | GGT | AAA    | -AC | TCGTC | CCA | GCA | ACC | -GC | GGTTA | TACGA | GA    | --- | GGCCC |
| Hats | TT  | AGA    | ----- | GGGCC | GGT | AAA    | -AC | TCGTC | CCA | GCC | ACC | -GC | GGTTA | TACGA | GA    | --- | GGCCC |
| Orla | TA  | AGA    | ----- | GAACC | GGT | TAA    | -AC | TCGTC | CCA | GCC | GCC | -GC | GGTTA | TACGA | GG    | --- | GGTTC |



|      |         |       |          |          |          |        |        |        |        |        |       |       |       |       |       |       |
|------|---------|-------|----------|----------|----------|--------|--------|--------|--------|--------|-------|-------|-------|-------|-------|-------|
| Cosa | TAAGCAA | ---   | AGGCCGGT | AAA-AC   | TCGTG    | CCA    | GCCACC | -GC    | GGTTA  | GACGA  | GA    | ---   | GGCCT |       |       |       |
| Exsp | TAAGA   | ----- | AGGCCGGT | AAA-AC   | TCGTG    | CCA    | GCCACC | -GC    | GGTTA  | TACGA  | GA    | ---   | GGCCT |       |       |       |
| Depa | TAAT    | -A    | ---      | AAGCCGGT | AAA-AC   | TCGTG  | CCA    | GCCACC | -GC    | GGTTA  | GACGA | GA    | ---   | GGCTT |       |       |
| Rima | CAATA   | ----- | GAGCCGGT | TAA-TT   | TCGTG    | CCA    | GCCACC | -GC    | GGTCA  | TACGA  | AT    | ---   | GGCTC |       |       |       |
| Fuol | TAACA   | ----- | GAGCCGGT | TAAAAC   | TCGTG    | CCA    | GCCACC | -GC    | GGTTA  | AACGA  | GA    | ---   | GGCTC |       |       |       |
| Gmaf | TAATAA  | ----- | GGGCCGGT | TAA-AC   | TCGTG    | CCA    | GCCACC | -GC    | GGTTA  | TACGA  | G-A   | ---   | GGCCC |       |       |       |
| Xeei | TAAAA   | ----- | GAGCCGGT | TAA-AC   | TCGTG    | CCA    | GCCACC | -GC    | GGTTA  | TACGA  | GA    | ---   | GACTC |       |       |       |
| Pros | TATAGA  | ---   | GGGCCGGT | AAA-AC   | TCGTG    | CCA    | GCCACC | -GC    | GGTTA  | TACGA  | GC    | ---   | GGCCC |       |       |       |
| Scmi | TAATA   | ----- | GGGCTGGT | AAA-AC   | TCGTG    | CCA    | GCCACC | -GC    | GGTTA  | TACGA  | GC    | ---   | AGCCC |       |       |       |
| Rolo | AAATTA  | ---   | GGGCCGGT | AAA-AC   | TCGTG    | CCA    | GCCACC | -GC    | GGTTA  | TACGA  | GA    | ---   | GGCCC |       |       |       |
| Cere | AAAC    | --AA  | ---      | GGGCCGGT | AAA-AC   | TCGTG  | CCA    | GCTACC | -GC    | GGTTA  | TACGA | G-A   | ---   | GGCCC |       |       |
| Daga | AA      | CA    | --A      | ---      | GAGCCGGT | AAA-AC | TCGTG  | CCA    | GCTACC | -GC    | GGTTA | TACGA | -GA   | ---   | GGCTC |       |
| Anco | AAAT    | --A   | ---      | GGGCCGGT | AAA-AC   | TCGTG  | CCA    | GCCACC | -GC    | GGTTA  | TACGA | G-A   | ---   | GACCC |       |       |
| Dmve | AA      | TTCTA | ---      | GGGCCGGT | AAA-AC   | TCGTG  | CCA    | GCCACC | -GC    | GGTTA  | GACGA | GA    | ---   | GGCTC |       |       |
| Dmar | AACTCTA | ---   | GGGCCGGT | AAA-AC   | TCGTG    | CCA    | GCCACC | -GC    | GGTTA  | GACGA  | G-A   | ---   | GGCTC |       |       |       |
| Anka | AAAC    | --AA  | ---      | GGGCCGGT | AAA-AC   | TCGTG  | CCA    | GCCACC | -GC    | GGTTA  | TACGA | GA    | ---   | GACCC |       |       |
| Moja | AAAC    | -AA   | ---      | GGGCCGGT | AAA-AC   | TCGTG  | CCA    | GCCACC | -GC    | GGTTA  | TACGA | G-A   | ---   | GACCC |       |       |
| Hoja | AAAC    | --AA  | ---      | GGGCCGGT | AAA-AC   | TCGTG  | CCA    | GCCACC | -GC    | GGTTA  | TACGA | G-A   | ---   | GACCC |       |       |
| Bede | TAA     | -G-A  | ---      | GGGCCGGT | AAA-AC   | TCGTG  | CCA    | GCCACC | -GC    | GGTTA  | TACGA | GC    | ---   | GACCC |       |       |
| Besp | TAA     | -G-A  | ---      | GGGCCGGT | AAA-AC   | TCGTG  | CCA    | GCCACC | -GC    | GGTTA  | TACGA | GC    | ---   | GACCC |       |       |
| Mysp | AAA     | ---   | GA       | ---      | GGACC    | GGT    | AAA-AC | TCGTG  | CCA    | GCCACC | -GC   | GGTTA | TACGA | GA    | ---   | GGTCC |
| Osja | AAA     | ---   | GA       | ---      | GGACC    | GGT    | AAA-AC | TCGTG  | CCA    | GCCACC | -GC   | GGTTA | TACGA | GA    | ---   | GGTCC |
| Sgro | AAAG    | -A    | ---      | GGACC    | GGT      | AAA-AC | TCGTG  | CCA    | GCCACC | -GC    | GGTTA | TACGA | GA    | ---   | GGTCC |       |
| Pzpa | TTAG    | -A    | ---      | GGGCCGGT | AAA-AC   | TCGTG  | CCA    | GCCACC | -GC    | GGTTA  | TACGA | GA    | ---   | GGCCC |       |       |
| Zeja | TAGTAA  | ---   | GGGCCGGT | AAA-AC   | TCGTG    | CCA    | GCCACC | -GC    | GGTTA  | TACGA  | GC    | ---   | GACCC |       |       |       |
| Zzne | TTT     | -A    | ---      | GGGCCGGT | AAA-AC   | TCGTG  | CCA    | GCCACC | -GC    | GGTTA  | TACGA | G-A   | ---   | GACCC |       |       |
| Zefa | TTA     | --AA  | ---      | GGGCCGGT | AAA-AC   | TCGTG  | CCA    | GCCACC | -GC    | GGTTA  | TACGA | GA    | ---   | GGCCC |       |       |
| Acni | TTAAA   | ----- | GGGCCGGT | AAA-AC   | TCGTG    | CCA    | GCCACC | -GC    | GGTTA  | TACGA  | GA    | ---   | GGCCC |       |       |       |
| Ncrh | TTAAA   | ----- | GGGCCGGT | AAA-AC   | TCGTG    | CCA    | GCCACC | -GC    | GGTTA  | TACGA  | GA    | ---   | GGCCC |       |       |       |
| Agca | TAA     | -GA   | ---      | GGGCCGGT | AAA-AC   | TCGTG  | CCA    | GCCACC | -GC    | GGTTA  | TACGA | GA    | ---   | GGCCC |       |       |
| Hydy | TAA     | -GA   | ---      | GGGCCGGT | AAA-AC   | TCGTG  | CCA    | GCCACC | -GC    | GGTTA  | TACGA | GA    | ---   | GGCCC |       |       |
| Gsac | TAG     | --A   | ---      | GGGCCGGT | AAA-AC   | TCGTG  | CCA    | GCCACC | -GC    | GGTTA  | TACGA | GA    | ---   | GGCCC |       |       |
| Pevo | CAAGA   | ----- | GGGTCGGT | AAA-AC   | TCGTG    | CCA    | GCAACC | -GC    | GGTTA  | TACGA  | GA    | ---   | GACCC |       |       |       |
| Hiku | TTT     | TA    | ---      | GGGCCGGT | AAA-AC   | TCGTG  | CCA    | GCCACC | -GC    | GGTTA  | TACGA | G-A   | ---   | GGCTC |       |       |
| Inpa | TATTC   | ---   | GGGCCGGT | AAA-AC   | TCGTG    | CCA    | GCCACC | -GC    | GGTTA  | TACGA  | GA    | ---   | GACCC |       |       |       |
| Auch | CAACA   | ----- | GAGCCGGT | AAA-CC   | TCGTG    | CCA    | GCCACC | -GC    | GGTGA  | TACGG  | AG    | ---   | GGCTC |       |       |       |
| Fico | CCTA    | -GA   | ---      | GGGCCGGT | AAA-AC   | TCGTG  | CCA    | GCCACC | -GC    | GGTTA  | TACGA | GA    | ---   | GGCCC |       |       |
| Macs | TAG     | --A   | ---      | GGGCCGGT | AAA-AC   | TCGTG  | CCA    | GCCACC | -GC    | GGTTA  | TACGA | GA    | ---   | GGCCC |       |       |
| Moal | TA      | -A-AA | ---      | GGGTCGGT | CAA-AC   | TCGTG  | CCA    | GCCACC | -GC    | GGTTA  | TACAA | GA    | ---   | GACTC |       |       |
| Syma | TAAA    | -A    | ---      | GAGTCGGT | AAA-TC   | TCGTG  | CCA    | GCCACC | -GC    | GGTTA  | TACAA | GA    | ---   | GACTC |       |       |
| Mafr | TAA     | --TA  | ---      | GAGCCGGT | AAA-AC   | TCGTG  | CCA    | GCCACC | -GC    | GGTTA  | TACGA | GA    | ---   | GGCTC |       |       |
| Dcpe | CAAGA   | ----- | GAGCCGGT | AAA-TT   | TCGTG    | CCA    | GCCACC | -GC    | GGTTA  | TACGG  | AA    | ---   | GGCTC |       |       |       |
| Dcti | CA      | -AGA  | ---      | GAGCCGGT | TAA-TT   | TCGTG  | CCA    | GCCACC | -GC    | GGTTA  | TACGG | AA    | ---   | GGCTC |       |       |
| Hehi | TAG     | -A    | ---      | GGGCCGGT | AAA-AC   | TCGTG  | CCA    | GCCACC | -GC    | GGCTA  | TACGA | G-A   | ---   | GGCCC |       |       |
| Stam | TAGCA   | ----- | GGGCCGGT | AAA-AC   | TCGTG    | CCA    | GCCACC | -GC    | GGTTA  | TACGA  | GA    | ---   | GGCCC |       |       |       |
| Hogi | TTAG    | -A    | ---      | GGGCCGGT | AAA-AC   | TCGTG  | CCA    | GCAACC | -GC    | GGTTA  | TACGA | GA    | ---   | GGCCC |       |       |
| Erzo | TAGA    | ----- | GGGCCGGT | AAA-AC   | TCGTG    | CCA    | GCCACC | -GC    | GGTTA  | TACGA  | G-A   | ---   | GGCCC |       |       |       |
| Hxot | TAGA    | ----- | GGGCCGGT | AAA-AC   | TCGTG    | CCA    | GCCACC | -GC    | GGTTA  | TACGA  | G-A   | ---   | GGCCC |       |       |       |
| Core | TAG     | -A    | ---      | GGGCCGGT | AAA-AC   | TCGTG  | CCA    | GCCACC | -GC    | GGTTA  | TACGA | GA    | ---   | GGCCC |       |       |
| Apve | TAAA    | -A    | ---      | GGGCCGGT | AAA-AC   | TCGTG  | CCA    | GCCACC | -GC    | GGTTA  | TACGA | GA    | ---   | GGCCC |       |       |
| Latj | TAGAA   | ---   | GGGCCGGT | TAA-AC   | TCGTG    | CCA    | GCCACC | -GC    | GGTTA  | TACGA  | GA    | ---   | GGCCC |       |       |       |
| Laja | TA      | -AGA  | ---      | GGGCCGGT | AAA-AC   | TCGTG  | CCA    | GCCACC | -GC    | GGTTA  | TACGA | GA    | ---   | GGCCC |       |       |



Syja TAGACT----GGGCCGGTAAA-TC**TCGTG**CCAG**GCACC**-GC**GGTTA**TACGA GA----GACCC  
 Epme TAA---AA---GGGCCGGTAAA-AC**TCGTG**CCAG**GCACC**-GC**GGTTA**TACGA GA----GGCCC  
 Grse TAA--GA---GGGCCGGTAAA-AC**TCGTG**CCAG**GCACC**-GC**GGTTA**TACGA GA----GGCTC  
 Clja CTAA--GA---GGGCCGGTAAA-TC**TCGTG**CCAG**GCACC**-GC**GGTTA**TACGA GA----GGCCC  
 Ogcy TAATTGTTA---GGGCCGGTAAA-AC**TCGTG**CCAG**GCACC**-GC**GGTTA**TACGA GTA---GACCC  
 Plna TTA--A----GGGCCGGTAAA-AG**TCGTG**CCAG**GCACC**-GC**GGTTA**TACGA CA----GGCCC  
 Lema TAAAA-----GAGCCGGTAAA-AC**TCGTG**CCAG**GCACC**-GC**GGTTA**TACGA GA----GGCTC  
 Etzo CAA---GA---GGGCCGGTAAA-AC**TCGTG**CCAG**GCACC**-GC**GGTTA**TACGA G-A---GGCCC  
 Apse TTAG-A----GGGCCGGTAAA-AC**TCGTG**CCAG**GCACC**-GC**GGTTA**TACGA GA----GGCCC  
 Epde TA--A-GA---GGGCCGGTAAA-AC**TCGTG**CCAG**GCACC**-GC**GGTTA**TACGA GA----GACCC  
 Slja TAA--GA---GGGCCGGTAAA-AC**TCGTG**CCAG**GCACC**-GC**GGTTA**TACGA GTT---GGCTC  
 Bsja CAAg--A---GGGTCGGTAAA-AC**TCGTG**CCAG**GCACC**-GC**GGTTA**TACGA G-A---GACCC  
 Ecna TAAG-A----GGGCCGGTAAA-AC**TCGTG**CCAG**GCACC**-GC**GGTTA**TACGA GA----GGCCC  
 Cohi TAATT-A----GGGTTGGTAAA-TT**TCGTG**CCAG**GCACC**-GC**GGTTA**GACGA AT---GACCC  
 Caar TAAGA-----GAGCCGGTAAA-AC**TCGTG**CCAG**GCACC**-GC**GGTTA**TACGA GA----GGCTC  
 Came TAA---GA---GAGCCGGTAAA-AC**TCGTG**CCAG**GCACC**-GC**GGTTA**TACGA GA----GGCTC  
 Mema TAAG--A---GGGCCGGTAAA-AC**TCGTG**CCAG**GCACC**-GC**GGTTA**TACGA GA----GGCCC  
 Lenu TATA-AA---GGGCCGGTAAA-AC**TCGTG**CCAG**GCACC**-GC**GGTTA**TACGA GA----GACCC  
 Plma TATTT-AA---GGGCCGGTAAA-AC**TCGTG**CCAG**GCACC**-GC**GGTTA**TACGA GA----GGCCC  
 Emst TAAG-A----GGGTCGGTAAA-AC**TCGTG**CCAG**GCACC**-GC**GGTTA**TACGA GA----GACCC  
 Ptti TAAG-A----GAGTCGGTAAA-AC**TCGTG**CCAG**GCACC**-GC**GGTTA**TACGA GA----GACCC  
 Losu TAAG---A---GGGCCGGTAAA-AT**TCGTG**CCAG**GCACC**-GC**GGTTA**TACGA ATA---GGCCC  
 Geoy TTA---GA---GGGCCGGTAAA-AT**TCGTG**CCAG**GCACC**-GC**GGTTA**TACGA AA---GGCCC  
 Dipi TA---AGA---GGGCCGGTAAA-AC**TCGTG**CCAG**GCACC**-GC**GGTTA**TACGA GA----GGCCC  
 Pama TAA---GA---GGGCCGGTAAA-AC**TCGTG**CCAG**GCACC**-GC**GGTTA**TACGA GA----GGCCC  
 Leob TAA---GA---GGGCCGGTAAA-AC**TCGTG**CCAG**GCACC**-GC**GGTTA**TACGA G-A---GGCCC  
 Neba TAAG---A---GAGTCGGTCAA-CC**TCGTG**CCAG**GCACC**-GC**GGTTA**TACGA GG---GACTC  
 Pdpi TAAT-AA---GGGCCGGTAAA-AC**TCGTG**CCAG**GCACC**-GC**GGTTA**TACGA GG---GGCCC  
 Nimi TAA--GA---GGGCCGGTCAA-AC**TCGTG**CCAG**GCACC**-GC**GGTTA**TACGA GA----GGCCC  
 Uptr TAAGA-----GGGCCGGTAAA-AC**TCGTG**CCAG**GCACC**-GC**GGTTA**TACGA GA----GGCCC  
 Pesc TAAA-GA---GGGCCGGTAAA-AC**TCGTG**CCAG**GCACC**-GC**GGTTA**TACGA G-G---GGCCC  
 Baar CTAAATAA---GGGCCGGTAAA-AC**TCGTG**CCAG**GCACC**-GC**GGTTA**TACGA GTCA---GGCCC  
 Moar TAAG-A----GGGTCGGTAAA-AC**TCGTG**CCAG**GCACC**-GC**GGTTA**TACGA GA----GACCC  
 Toja TAAC-A----GGGCCGGTAAA-AC**TCGTG**CCAG**GCACC**-GC**GGTTA**TACGA G-G---GACCC  
 Chau TAGT-GA---GAGTCGGTAAA-AC**TCGTG**CCAG**GCACC**-GC**GGTTA**TACGA GA----GACTC  
 Chse TAAGA-----GGGTCGGTAAA-AC**TCGTG**CCAG**GCACC**-GC**GGTTA**GACGA GG---GACTC  
 Enar TAAG--A---GGGCCGGTAAA-AC**TCGTG**CCAG**GCACC**-GC**GGTTA**TACGA GA----GGCCC  
 Hpty TAA--GA---GGGTCGGTAAA-AC**TCGTG**CCAG**GCACC**-GC**GGTTA**TACGA GA----GACCC  
 Nana TAA--GA---GGGCCGGTAAA-AC**TCGTG**CCAG**GCACC**-GC**GGTTA**TACGA GA----GGCCC  
 Mcst TAA--GA---GGGCCGGTAAA-AC**TCGTG**CCAG**GCACC**-GC**GGTTA**TACGA GA----GACCC  
 Rhox TAA--GA---GGGCCGGTAAA-AC**TCGTG**CCAG**GCACC**-GC**GGTTA**TACGA GA----GGCTC  
 Opfa AA---AGA---GGGCCGGTAAA-AC**TCGTG**CCAG**GCACC**-GC**GGTTA**TACGA GA----GGCCC  
 Paar TA-ATCCT---GGGCCGGTCAAAC**TCGTG**CCAG**GCACC**-GC**GGTTA**AACGT GATTATGGCCC  
 Gozo TAAG--A---GGGCCGGTTAA-AC**TCGTG**CCAG**GCACC**-GC**GGTTA**TACGA GA----GGCCC  
 Ackr TATT--AA---GGGCCGGTAAA-AC**TCGTG**CCAG**GCACC**-GC**GGTTA**TACGA GA----GGCCC  
 Elev TAA---TA---GGGCCGGTTAA-AC**TCGTG**CCAG**GCACC**-GC**GGTTA**TACGA GG---GGCCC  
 Trdu CAA---GA---GGGCCGGTAAA-AC**TCGTG**CCAG**GCACC**-GC**GGTTA**TACGA G-A---GGCTC  
 Amoc CTAG--A---GGGCCGGTAAA-AC**TCGTG**CCAG**GCACC**-GC**GGTTA**TACGA GA----GGCTC  
 Hame TAACA-----GGGCCGGTAAA-TC**TCGTG**CCAG**GCACC**-GC**GGTTA**TACGA GA----GACCC  
 Chso TAAG--A---GGGCTGGTAAA-TC**TCGTG**CCAG**GCACC**-GC**GGTTA**TACGA AA---GGCCC  
 Lyto TAAG--A---GGGCCGGTAAA-AC**TCGTG**CCAG**GCACC**-GC**GGTTA**TACGA GA----GGCCC  
 Encr TAAG-A----GGGCCGGTAAA-AC**TCGTG**CCAG**GCACC**-GC**GGTTA**TACGA GA----GGCCC

|      |    |            |          |        |       |     |        |     |       |       |        |       |
|------|----|------------|----------|--------|-------|-----|--------|-----|-------|-------|--------|-------|
| Bvar | CT | AC-CA---   | GGGCCGGT | AAA-CC | TCGTG | CCA | GCCACC | -GC | GGTTA | TACGT | GG---  | GACCC |
| Noco | TA | AG--A---   | GGGCCGGT | AAA-AC | TCGTG | CCA | GCCACC | -GC | GGTTA | TACGA | GA---  | GGCCC |
| Chsp | CA | AA--AA---  | GAGCCGGT | AAA-AC | TCGTG | CCA | GCCACC | -GC | GGTTA | GACGT | AGA--- | GGCTC |
| Arja | TA | AG--A---   | GGGCCGGT | AAA-AC | TCGTG | CCA | GCCACC | -GC | GGTTA | TACGA | GA---  | GGCCC |
| Pase | TA | TACATA---  | GGGCTGGT | CAAGAC | CCGTG | CCA | GCCACC | -GC | GGTTA | GACGG | G-A--- | AGCCC |
| Trel | CA | A--G-A---  | GGGCCGGC | AAA-AC | TCGTG | CCA | GCCACC | -GC | GGTTA | TACGA | GA---  | GGCTC |
| Lifa | TA | ACA-----   | GAGCCGGT | AAA-CA | TTCGT | GCC | AGCAGC | -CC | CGTT  | ACACC | GTT--- | GGCTC |
| Acur | CA | ACA-----   | AGGCCGGT | CAA-TC | TCGTG | CCA | GCCACC | -GC | GGTTA | CACGG | AA---  | GGCCT |
| Ampe | TA | A--GA---   | GGGCCGGT | AAA-AC | TCGTG | CCA | GCCACC | -GC | GGTTA | TACGA | GA---  | GGCCC |
| Urja | TA | AA--TA---  | GAGCCGGT | AAA-AC | TCGTG | CCA | GCCACC | -GC | GGTTA | TACGA | GA---  | GGCTC |
| Enet | TA | AC-A-----  | GGGCCGGT | AAA-AC | TCGTG | CCA | GCCACC | -GC | GGTTA | TACGA | GA---  | GGCCC |
| Ptbr | TT | -A-AA---   | GGGCCGGT | AAA-AC | TCGTG | CCA | GCCACC | -GC | GGTTA | TACGA | GA---  | GGCCC |
| Safa | CT | ACA-----   | GGGCCGGT | TAA-AC | TCGTG | CCA | GCCACC | -GC | GGTTA | TACGA | GA---  | GGCCC |
| Icae | TA | A--GA---   | GGGCCGGT | AAA-AC | TCGTG | CCA | GCCACC | -GC | GGTTA | TACGA | GA---  | GGCCC |
| Asmi | TA | TT-AA---   | GGGTCGGT | AAA-AT | TCGTG | CCA | GCCACC | -GC | GGTTA | TACGA | AA---  | GACCC |
| Foal | TT | AC--A---   | GGGCCGGT | AAA-CC | TCGTG | CCA | GCTACC | -GC | GGTGA | TACGG | AG---  | GGCCC |
| Drze | TA | ATT-A-A--- | GGGCCGGT | AAA-AC | TCGTG | CCA | GCCACC | -GC | GGTTA | TACGG | GA---  | GACCC |
| Rhas | CA | AG-A-----  | GAGCCGGT | AAA-AC | TCGTG | CCA | GCCACC | -GC | GGTTA | TACGA | GA---  | GGCTC |
| Elac | CA | AC--A---   | GAGCCAGC | AAA-AC | TCGTG | CCA | GCCGCC | -GC | GGTTA | TACGA | GG---  | GGCTC |
| Kugu | TA | AA-CTA---  | GGGCCGGT | AAATAC | ACGTG | CCA | GCCACC | -GC | GGTTA | CACGT | CCGAA- | GGCCC |
| Plor | TA | A--GA---   | GGGTCGGT | AAA-AC | TCGTG | CCA | GCCACC | -GC | GGTTA | TACGA | GA---  | GACCC |
| Sgun | TA | A--G-A---  | GGGTCGGT | AAA-AC | TCGTG | CCA | GCCACC | -GC | GGTTA | TACGA | GA---  | GACCC |
| Zaco | TA | A--G-A---  | GGGTCGGT | AAA-AC | TCGTG | CCA | GCCACC | -GC | GGTTA | TACGA | GA---  | GACCC |
| Zbfl | TA | AG--A---   | GGGTCGGT | AAA-AC | TCGTG | CCA | GCCACC | -GC | GGTTA | TACGA | GA---  | GACCC |
| Spba | CA | TTCA-----  | GGGCCGGT | AAA-AC | TCGTG | CCA | GCCACC | -GC | GGTTA | TACGA | GA---  | GGCCC |
| Game | TA | A--GA---   | GGGCCGGT | AAA-AC | TCGTG | CCA | GCCACC | -GC | GGTTA | TACGA | GA---  | GGCCC |
| Thth | TA | AG-A-----  | GGGCCGGT | AAA-AC | TCGTG | CCA | GCCACC | -GC | GGTTA | TACGA | GA---  | GGCCC |
| Xigl | TA | A--GA---   | GGGCCGGT | AAA-AC | TCGTG | CCA | GCCACC | -GC | GGTTA | TACGA | GA---  | GGCCC |
| Hyja | TA | AG--A---   | GGGCCGGT | AAA-AC | TCGTG | CCA | GCCACC | -GC | GGTTA | TACGA | GA---  | GGCCC |
| Psan | TA | AG-A-----  | GAGCCGGT | AAA-AC | TCGTG | CCA | GCTACC | -GC | GGTTA | CACGA | GA---  | GGCTC |
| Cupa | TA | AG-A-----  | GGGCCGGT | AAA-AC | TCGTG | CCA | GCCACC | -GC | GGTTA | TACGA | GA---  | GGCCC |
| Mpch | AA | AA-A-----  | GAGCCGGT | AAA-AC | TCGTG | CCA | GCCACC | -GC | GGTTA | TACGA | GA---  | GGCTC |
| Char | TA | AG--A---   | GAGTCGGT | AAA-AC | TCGTG | CCA | GCCACC | -GC | GGTTA | TACGA | GG---  | GACCC |
| Pser | TA | AGA-----   | GGGCCGGT | AAA-AC | TCGTG | CCA | GCCACC | -GC | GGCTA | TACGA | TGA--- | GGCTC |
| Prol | TA | A--GA---   | GGGCCGGT | AAA-AC | TCGTG | CCA | GCCACC | -GC | GGTTA | TACGA | GA---  | GGCCC |
| Plbi | TA | A--GA---   | GGGCCGGT | AAA-AC | TCGTG | CCA | GCCACC | -GC | GGTTA | TACGA | GA---  | GGCCC |
| Calu | TA | ACCA---    | GAGCCGGT | AAA-AC | CCGTG | CCA | GCCACC | -GC | GGTTA | TACGG | GA---  | GGCTC |
| Papa | TA | TT--T-A--- | GAGCCGGT | AAAACC | TTGTG | CCA | GCTACC | -GC | GGTTA | CACGA | G-A--- | GGCTC |
| Sufr | TT | CA-GA---   | GGGCCGGT | AAA-AC | TCGTG | CCA | GCCACC | -GC | GGTTA | TACGA | GG---  | GGCCC |
| Stci | TA | AGA-----   | GGGCCGGT | AAA-AC | CCGTG | CCA | GCCACC | -GC | GGTTA | TACGG | GG---  | GGCCC |
| Taru | CT | A--AA---   | GAGTCGGT | AAA-AC | TCGTG | CCA | GCCACC | -GC | GGTTA | TACGA | GA---  | GACCC |
| Rala | TA | AG-A-----  | GGGCCGGT | AAA-AC | TCGTG | CCA | GCCACC | -GC | GGTTA | TACGA | GA---  | GGCCC |

\* \* \* \*\*

|      | 3'        | HVR       | 18    | C     | 19   | 20    | HVR | 1                    |
|------|-----------|-----------|-------|-------|------|-------|-----|----------------------|
| Scca | ACATTAACA | CT--T-CCC | GGCGT | AAAGT | GTGA | TTTAA | GC  | ATGACCTCCAAATAAC---  |
| Muma | ATATTAACA | CA--C-CCC | GGCGT | AAAGA | GTGC | TTTA- | AC  | AATGACCTTTTAATAAC--  |
| Erca | AAAATGATA | GT--CCTTC | GGCGT | AGAGT | GTGC | TTAA- | CC  | TAAATTAAT--AA--AC--  |
| Pose | AAAATGATA | GT--CCTTC | GGCGT | ATGGT | GTGC | TTA-- | GC  | AATTAATTATAAACT---   |
| Actr | CAACTGATA | G---TCCAC | GGCGT | AAAGC | GTGA | TTAAA | GC  | ATGCCTACTACAC-----   |
| Scal | CAACTGATA | G---TTCAC | GGCGT | AAAGC | GTGA | TTAAA | GC  | ATACCCACTGCAC-----   |
| Posp | CAACTGATA | GT--CCAC- | GGCGT | AAAGC | GTGA | TTAAA | GC  | ACGCCACTACAC-----    |
| Atsp | TAACTGACA | GC--CCA-C | GGCGT | AAAGC | GTGA | TTATA | GC  | ATGCTACCCTA----AC--  |
| Leoc | CAACTGATA | GC--CCAC- | GGCGT | AAAGC | GTGA | TTATA | GC  | ATGCTGCCCAAC-----    |
| Amca | CAATTGATA | GA--CATC- | GGCGT | AAAGC | GTGA | TTACA | GC  | CTGCTGCTATAAAT-----  |
| Osbi | CAGTTGACA | C---TAT-C | GGCGT | AAAGT | GTGA | CTAC- | AC  | AAAAATAT-----AAAAC-  |
| Pabu | AAGCTGATA | AT--T-ATC | GGCGT | AAAGA | GTGA | TA--- | AT  | CCTAAT-----ATAC-     |
| Hial | TAGTTGACA | G---CTATC | GGCGT | AAAGC | GTGA | TTAT- | AC  | GACGCTAAAC--AAC----  |
| Elha | GAGTTGATG | G---TCACC | GGCGT | AAAGA | GTGA | TTAT- | AC  | CATGTTAAAATAAC-----  |
| Mlcy | AAATTGACA | GC--CA-TC | GGCGT | AAAGA | GTGC | TTAT- | AC  | ACCCCTACA--CA--AC--  |
| Algl | AAGTTGATG | T---CCGCC | GGCGT | AAAGA | GTGA | TTACA | GC  | AGTGTGTATA--AC-----  |
| Ptgi | AAATTGATG | C---TCGTC | GGCGT | AAAGA | GTGA | TTACA | GC  | AATATAAACAAC-----    |
| Alaf | AAATTGACA | CT--CCAC- | GGCGT | AAAGA | GTGA | TTAAA | GC  | AGTACCCC---AA-C----  |
| Nock | AAATTGATG | AT--C-AGC | GGCGT | AAAGA | GTGA | TTAAA | GC  | AGTAAA-A--T--AAC---- |
| Anja | AAATTGATA | TT--ACAC- | GGCGT | AAAGC | GTGA | TTAA- | AA  | AACAA----ACAA---AC-  |
| Gyki | GAATTGACA | CA--TCAC- | GGCGT | AAAGT | GTGA | TTAG- | AC  | ATAAACC---AGAC-----  |
| Syka | AAGTTGACA | CT--TTTTC | GGCGT | AAAGC | GTGA | TTAA- | GC  | ACTATAAT-----A-AAC-  |
| Opma | AAATTGATA | TT--C-CAC | GGCGT | AAAGC | GTGA | TTAA- | AC  | AAAAT----AAATAC----  |
| Comy | AAACTGATA | TC--TCTC- | GGCGT | AAAGC | GTGA | TTAG- | AC  | AAAAAAGACAAC-----    |
| Sasp | AAGCTGACA | CC--TC-AC | GGCGT | AAAGC | GTGA | TTA-- | GA  | AATATA-A--TTA-AC---  |
| Eupe | AAACTGATG | CA--TCA-C | GGCGT | AAAGC | GTGA | TTA-- | GA  | ATATTTAAC-----A-CAA  |
| Enja | TAGTTGATT | GA---AGC  | GGCGT | AAAGA | GTGC | TTAT- | GC  | AATTTTCTAC-CC-----   |
| Same | TAGTTGATT | T---AATC- | GGCGT | AAAGA | GTGC | TTAT- | GC  | AGAATAAGAAAC-----    |
| Chch | TAGTTGACC | AA--C-TAC | GGCGT | AAAGC | GTGC | TCAC- | GC  | AGAGCAAT----CAATAC-  |
| Grgr | TAGTTGACA | GT--CGC-  | GGCGT | AAAGA | GTGA | TTAG- | GC  | CGCACCCC-----CGAAC-  |
| Caau | TAGTTGATA | TT--ACAAC | GGCGT | AAAGG | GTGC | TTAA- | GC  | GATAA---ACAAAAA----- |
| Cyca | TAGTTGATA | TT--ATAAC | GGCGT | AAAGG | GTGC | TTAA- | GC  | ATA-AAC-AAAAA-----   |
| Dare | TAGTTGATA | TA--CTA-C | GGCGT | AAAGG | GTGC | TTAA- | GC  | AACAATG-----TAAAA--  |
| Cost | TAGTTGATG | GG--CA-C- | GGCGT | AAAGG | GTGC | TTAA- | GC  | TTTAATT-TAAA-----    |
| Leec | TAGTTGTTA | AA--T-ACC | GGCGT | AAAGG | GTGC | TTAA- | GC  | AGA-GCAAAGA-----     |
| CrIa | TAGTTGATA | GG--T-G-C | GGCGT | AAAGG | GTGC | TTAA- | GC  | AGAG-C--AAGAAT-----  |
| Clmc | TAGTTGATA | GA--TAC-  | GGCGT | AAAGA | GTGC | TCTA- | GC  | ACCCACAAC---AAAA---  |
| Phin | AAGTTGACA | AA--C-AC- | GGCGT | AAAAA | GTGC | TTAT- | GT  | GTTATACTAAA-----     |
| Icpu | TAGTTGCTA | G---CCA-C | GGCGT | AAAGG | GTGC | TTAA- | GC  | ACAACAATG-----AA-    |
| Psto | TAGTTGATA | G---ACA-C | GGCGT | AAAGG | GTGC | TTAA- | GC  | AAGACAAATA-----A---  |
| Cora | TAGTTGATA | GA--CA--C | GGCGT | AAAGG | GTGC | TTA-- | GC  | ATAACAAC-----AAAA--  |
| Eisp | TAGTTGACA | G---C-CAC | GGCGT | AAAGA | GTGC | TTAA- | GC  | AGTCCTACCA-AA-----   |
| Apal | AAGTTGATA | G---TCA-C | GGCGT | AAAGA | GTGC | TTAAG | GC  | AACTA-ATA---AA-----  |
| EsIu | TAGTTGATA | A---TTGTC | GGCGT | AAAGA | GTGC | TTT-- | AC  | AAAATAA-TTT---AA--   |
| Dape | TAGTTGATA | AA--C-ATC | GGCGT | AAAGA | GTGC | TTA-- | AC  | ACATAAAA---TAA----   |
| Glse | AAGTTGATA | GT--T-TTC | GGCGT | AAAGA | GTGC | TTAG- | GC  | AGTC-TTTTAAC-----    |
| Naar | AAGTTGATG | GT--TACC- | GGCGT | AAAGA | GTGC | TTAC- | GC  | AACTTTT--AAAC-----   |
| Baoc | AAGTTGATG | AC--CAC-C | GGCGT | AAAGA | GTGC | TTAC- | GC  | AAGCACTTAC-----      |
| Opso | AAGTTGATA | -T--TTACC | GGCGT | AAAGA | GTGC | TTAC- | GC  | AAC-----TTAATAAC-    |
| Alte | CAGTTGATA | G---GTG-C | GGCGT | AAAGA | GTGC | TTAT- | GC  | AGTATACCCA-----GC--  |
| Plap | CAGTTGATA | GA--T-A-C | GGCGT | AAAGA | GTGC | TTAA- | GC  | AATACACCGAAC-----    |

Plal AAGTTGAAA GT--TA-CCGGCGTAAAGA GTGC TTAG-CC AAACA--AAAAAC-----  
 Sami AAGTTGAAA GT--CAC-CGGCGTAAAGA GTGC TTAG-CC GGACAA-----GAAAC-  
 Rere AAGTTGAAA G---TCGCCGGCGTAAAGA GTGC TTA--CC AAAAGAT-CAAA----C--  
 Gama AAGTAGATA GA--CAT-CGGCGTAAAGT GTGC TTAG-CC ATTTGT-----CAGC----  
 Onmy TAGTTGATA AC--TACC-GGGGTAAAGA GTGC TTAT-CC AAAAT-AT---TTAA----  
 Sasa TAGTTGATA AC--TACC-GGGGTAAAGA GTGC TTAC-CC AAAATATT---TA-A---  
 Cola TAGTTGATA AT--CA-CCGGCGTAAAGA GTGC TTA--CC AATTAT-A--TTTAA----  
 Dita GAGTTGACAGA--C-GCCGGCGTAAAGA GTGC TTAGA CC AAAT-----AGGAAC---  
 Gogr AAGTTGATA AT--C-ACC GGCGCAAAGC ATGC TTAA-CC ACATAATAA-AC-----  
 Chsl AAGTTGACACC--C--GC GGCGTAAAGA GTGC TTAG-CC GCAAGACAAC-----  
 Atja AAGTTGATA GG--AAT-CGGCACAAAGG GTGC TTA--AC AAAACTAAGCA----G---  
 lido GAGTTGATA G---GAATC GGCGCAAAGG GTGC TTA--AC AAAACTAAAT--GG-----  
 Auja AAGTTGACT -T--ACACC GGCGTAAAGT GTGC TTAG-CC CCCC-----ACCTC-TAA-  
 Chag AAGTTGACAG---AATTC GGCGTAAAGA GTGC TTAC-CC ATACAATTTAC-----  
 Hami GAGTTGATA AA--CATC-GGGGTAAAGT GTGC TTA--CC ACTTTTCCC-ACC-----  
 Saun GAGTTGATA A---ACATC GGCGTAAAGT GTGC TTA--CC ATTTTT-CCCA----C---  
 Nema AAGCTGATA GG--A-AAC GGCGTAAAGA GTGC TTAG-CC AAATTTTA-----AT-AC-  
 Disp AAGCGGATG AC--CAA-CGGCGTAAAGA GTGC TTAG-CC AGACCCCCAA-----C---  
 Myaf AAGTTGACAGT--CAAC-GGGGTAAAGC GTGC TTAG-AC AATTACCC---CCAC----  
 Lagu AAGTCGACAGC--C-TGC GGCGTAAAGA GTGC TTA--AC CGCCCC-CCCCA-AC--  
 Trtr AAGTCAATAGC--C-CCC GGCGTAAAGA GTGC TTA--CC ATTACCCTA-----A--AC  
 Zucr AAGTCAATAG---TACCC GGCGTAAAGA GTGC TTA--CC AGAACTA-AAA----AC--  
 Pxja AAGTTGATA GG--T-ACC GGCGTAAAGC GTGC TTAA-CC TTAA-C--ACAAAC-----  
 Pxlo AAGTTGATA GG--T-ACC GGCGTAAAGC GTGC TTAA-CC TTAACG-TAAA----C---  
 Pctr AAGTTGATT AT--A-CCC GGCGTAAAAG GTGC CTAG-CC TAAC-----TAAACA---  
 Apsa AAGTTGACAAA--CAC-CGGCGTAAAGC GTGA TTAA-CC TTTACATT-----A-AC--  
 Cabe AAGTTGACGAA--GCC-CGGCGTAAAGC GTGC TTA--AC AGTACATC-----AAAC-  
 Bzze AAGTTGATA AA--TGC-CGGCGTAAAGC GTGC TTAA-CC AAAGACTC-----A-AAC-  
 Siim AAGTTGATAGC--CTAC-GGGGTAAAGG GTGC TTA--AC AGAACAACAT---AAAC--  
 Ctru AAGTTGATA AC--TC-CCGGCGTAAAGT GTGC TTAA-CC AAAACC-T-A--GA--AC-  
 Dpbr AAGTTGATGA---CCCC GGCGTAAAGC GTGC TTAA-CC AATC-----CTT-AAAAC-  
 Caki AAGTTGATA GA--CAAC-GGGGTAAAGC GTGC TTAA-AC TATTAATT---AAA-----  
 Phja AAGTTGATA GG--AAT-CGGCATAAAGT GTGC TTTA-CC AATAAA-----AATAA---  
 Brsp AAGTTGATA GT--GCCG-GGGGTAAAGT GTGC TCT--AT TAATCATATT---AA----  
 Gamo AAATTGATGAA--AAAC-GGGGTAAAGC GTGC TTA--AC AAAAAAGAG---AAAA---  
 Lolo AAGTTGATGAA--A-AAC GGCGTAAAGC GTGC TTA--AC AAAACAAG-----AAAA  
 Batr AAGAAAATA -A--ACTC-GGCACAAAGG GTGC TTAA-AC ACTGA---CTATC-AAA-  
 Prmy AAAGTATAAA----ACC GGCGCAAAGG GTGC TTA--AT ATAA-C--TCAGAA-----  
 Loli GAGCTGACAG---TCCCC GGCGTAAAGC GTGC TTAA-CC TACACCCTAATACAAAT-  
 Loam AAGTTGATA AC--AGT-CGGCGTAAAGC GTGC TTA--CC CCATCAACC-----CCCAC  
 Chab AAATTGATAG---CCATC GGCGTAAAGG GTGC TTA--AC ATTAT-----AT--TCAA  
 Chto AAATTGATAG---CCATC GGCGTAAAGG GTGC TTA--AC ATTAT-----ATTCAA  
 Majo AAGTTGATA A---GCATC GGCGTAAAGG GTGC TTAG-CC AAAACTATAC-----AA-  
 Hlst AAATTGACAG--T-T-C GGCGTAAAGC GTGC TTAA-CC ATA ACTT---AAAG----  
 Clpe GAGTTGATAGA--A-GCC GGCGTAAAGG GTGC TTA--CC ATCT-TCTATG-AA-----  
 Mlmr AAATTGACAGG--T-GTC GGCGTAAAGG GTGC TTA--TC ATTTTA---ATAAGA---  
 Crcr AAGCTGATAGA--TGC-CGGCGTAAAGA GTGC TTAA-GT ATCTTGAT-----AGAAC-  
 Muce AAGCTGATAGA--TGC-CGGCGTAAAGA GTGC TTAA-GT ATCTTGAT-----AGAAC-  
 Bege AAGTTGACAG---TTACC GGCGTAAAGA GTGC TTA--AC AAAAA-----TTTTAAAC  
 Mela AAGTTGACAGC--CAT-CGGCATAAAGC GTGC TTA--CC AGAATTTT-----AAAC--  
 Hats AAGTTGACAG---CCACC GGCGTAAAGA GTGC TTA--AC AGATA-----ATG-AAAAC  
 Orla AAGCTGATAG---ATAAC GGCGTAAAGA GTGC TTA--AT TTAA-AAGAGAAGC-----

Cosa AAGTTGATAGC--C-ACC**GGCGT**AAAGA**GTGC**TTAG-**GC**ATAAAAT-----GAAAAC-  
 Exsp AAGTTGACAGA--C-AAC**GGCGT**AAAGA**GTGC**TTAA-**GC**AAAAA-T--TTCTAC----  
 Depa AAATTGATAAT--TATC-**GGCGT**AAAGC**GTGC**TTA--**AC**AATA-----ATACATAC  
 Rima AAGTTGATG---TCCCC**GGCGT**AAAGC**GTGC**TTAA-**AC**ACCCCT-CCCC--AC---  
 Fuol GAGTTGATAGC--CTTC-**GGCGT**AAAGC**GTGC**TTAA-**GC**AAC-----TATCAGAC-  
 Gmaf AAGTTGATAAA--AT-AC**GGCGT**AAAGC**GTGC**TTAA-**AA**GCCCC-A--CTAAAC---  
 Xeei AAGTTGATAGT--C-TTC**GGCGT**AAAGC**GTGC**TTAA-**AA**ATGA-A-TTGACAA-----  
 Pros AAGCTGATAGT--CCT-C**GGCAG**AAAGC**GTGC**TTAA-**GC**AATAATAT-----AAAC--  
 Scmi AAGCTGATAAA--T-ATC**GGCGT**AAAGA**GTGC**TTAA-**GC**AGT-AAAACAAAA-----  
 Rolo AAGTTGATAG--ATACC**GGCGT**AAAGA**GTGC**TTAG-**GC**CACAACTTCTA-----AC-  
 Cere AAGTTGATAGA--TAT-C**GGCGT**AAAGA**GTGC**TTAG-**GC**CACATTA-----A-AAC-  
 Daga AAGTTGATCG---ATTAC**GGCGT**AAAGA**GTGC**TTAA-**GC**AAG-ACC-TAAAC-----  
 Anco AAGTTGATAAG--CAA-C**GGCGT**AAAGA**GTGC**TTAA-**GC**AAACATCT-----ATAAC-  
 Dmve AAGCTGATGAA--TCA-C**GGCGT**AAAGA**GTGC**TTAA-**GC**AATCCCCAGA----AC---  
 Dmar AAGCTGATAAA--C-AAC**GGCGT**AAAGA**GTGC**TTAA-**GC**GACAC-T--CACAA-----  
 Anka AAGTTGATAAG--C-AAC**GGCGT**AAAGA**GTGC**TTAA-**GC**AAACAC-----CCCAAC--  
 Moja AAGTTGATAAG--CA-AC**GGCGT**AAAGA**GTGC**TTAA-**GC**AAACCCCC-A--CAA-AC-  
 Hoja AAGTTGATAAG--CAA-C**GGCGT**AAAGA**GTGC**TTAA-**GC**AAACACCC-----A-AAC-  
 Bede AAGCTGATAGT--C-ACC**GGCGT**AAAGA**GTGC**TTAG**GA**ACAACCC-----AA-AC--  
 Bsp AAGCTGATAGT--CAC-C**GGCGT**AAAGA**GTGC**TTAG**GC**ACAGCCCAA----AC----  
 Mysp AAGTTGATAGA--A-ACC**GGCGT**AAAGA**GTGC**TTA--**GC**ATAATCTTA----TTAAC  
 Osja AAGTTGATG---AAGCC**GGCGT**AAAGA**GTGC**TTAG-**GC**CGCCACCCTAAAC-----  
 Sgro AAGTTGATGAT--ATACC**GGCGT**AAAGA**GTGC**TTAG-**GC**AAAACAAAATAA----AC-  
 Pzpa AAGTTGATAGC--CTAAC**GGCGT**AAAGC**GTGC**TTAG-**AC**AAATTAAT-----AC---  
 Zeja AAGTTGATAGC--CTA-C**GGCGT**AAAGC**GTGC**TTA--**AC**AAAATAAAT-----AC---  
 Znne AAGTTGACAGC--CCAAC**GGCGT**AAAGC**GTGC**TTA--**AC**TACCCCC-C--CCCAAC-  
 Zefa AAGTTGACAAC--TCAAC**GGCGT**AAAGC**GTGC**TTA--**AC**TACCCCC-CCCCCCCAC--  
 Acni AAGTTGATAGC--CCAAC**GGCGT**AAAGC**GTGC**TTA--**GC**AAAA-----CTAAACAAC  
 Ncrh AAGTTGATAGC--CCAAC**GGCGT**AAAGC**GTGC**TTA--**GC**AAAATA-----ACAAC-  
 Agca AAGTTGATAG---ACACC**GGCGT**AAAGC**GTGC**TTA--**AC**ATATTCTAAA----AC---  
 Hydy AAGTTGATGAA--A-AAC**GGCGT**AAAGC**GTGC**TTA--**AC**TTAAAATCAAA-AC-----  
 Gsac AAGTTGATGAAA--ATTCC**GGCGT**AAAGA**GTGC**TTA--**AC**CTAAAATTAATA-----  
 Pevo AAGTTGACAGA--TATC-**GGCAT**AAAGC**GTGC**TTAA-**GC**AAACATAAAAA-----  
 Hiku AAGATAATAGA--AGTC-**GGCGT**AAAGA**GTGC**TTA--**AC**TATAAATA-----AC---  
 Inpa AAACTGATAGA--T-CAC**GGCGT**AAAGC**GTGC**TTAA-**AC**CACAA-----ACAAAA--  
 Auch AAGTTGATCGC--C-GTC**GGCGT**AAAGT**GTGC**TT--**AC**AGTAAAA-CTAGA---G-  
 Fico AAGTTGATAG---CCTAC**GGCGT**AAAGA**GTGC**TTA--**AC**ATGTCT-AATTT--AT---  
 Macs AAGTTGACAG---ATGCC**GGCGT**AAAGA**GTGC**TTA--**AC**ATTCT-TATTC-AAC---  
 Moal AAGTTGATGAAA--CAGAC**GGCGT**AAAGA**GTGC**TTA--**AC**AAAATCC-CAA----AC---  
 Syma AAACTGATAAC--ACAAC**GGCGT**AAAGA**GTGC**TTA--**AC**AAAAACCCAAC-----  
 Maf r AAGTTGACAAA--CTA-C**GGCGT**AAAGA**GTGC**TTA--**AC**AACATTCCAAAA-----  
 Dcpe AAGTTGATAGC--C-ATC**GGCGT**AAAGC**GTGC**TTAG-**GC**AGCCCGTA----AAAAC-  
 Dct i AAGTTGATAGC--CCTC-**GGCGT**AAAGT**GTGC**TTAA-**GC**AAGTCCCCTTAAC-----  
 Hehi GAGTTGATACC--AT-TC**GGCGT**AAAGA**GTGC**TTAT-**GC**AAAATAAA-A-----AC-  
 Stam AAGTTGTCAAGT--TAC-C**GGCGT**AAAGA**GTGC**TTAA-**AC**AATAATA-----TAGAC--  
 Hogi AAGTTGATAT---GCATC**GGCGT**AAAGC**GTGC**TTA--**AC**ACTGTAT-AAAAC-----  
 Erzo AAGTTGAAAAG--C-ATC**GGCGT**AAAGA**GTGC**TTA--**AC**TAAAA-A--TTAAAC----  
 Hxot AAGTTGATAGA--C-ACC**GGCGT**AAAGA**GTGC**TTA--**AC**TTAAAAC-C--TCATAC--  
 Core AAGTTGACAAA--CACC-**GGCGT**AAAGC**GTGC**TTA--**AC**TTAAAAATCGTAC-----  
 Apve AAGTTGACAG---ACACC**GGCGT**AAAGA**GTGC**TTA--**AC**TTAAAAC-TTAA---AC--  
 Lat j AAGTTGACAAA--CCA-C**GGCGT**AAAGA**GTGC**TTAA-**GC**AAACTTAAA----AC----  
 Laja AAGTTGATAGT--CACC-**GGCGT**AAAGC**GTGC**TTA--**GC**ATAAAATTAAGAC-----



Syja AAGTTGATGCA--CACC-GGC<sup>GT</sup>AAAGA<sup>GTGC</sup>TT--AC<sup>T</sup>CAAGACTTTT--AAAA--  
 Epme AAGTTGACAGG--C-ACC-GGC<sup>GT</sup>AAAGC<sup>GTGC</sup>TAA-<sup>GC</sup>AACAAA-----ACACAC-  
 Grse AAGTTGATAGA--T-CCC-GGC<sup>GT</sup>AAAGA<sup>GTGC</sup>TAA-<sup>AC</sup>ATTAGGTCC-----GACAC  
 Clja AAGTTGTTAAT--C-ATC-GGC<sup>GT</sup>AAAGG<sup>GTGC</sup>TAA-<sup>AA</sup>ATAA-A-ATTTTAC-----  
 Ogcy AAGTTGACAGA--CTAC-GGC<sup>GT</sup>AAAGA<sup>GTGC</sup>TAA-<sup>GC</sup>AGAAAAATATT-AAAC---  
 Plna AAGTTAATAGA--CATC-GGC<sup>GC</sup>AAAGC<sup>GTGC</sup>TAA-<sup>AC</sup>AAAACTTTACAAC-----  
 Lema AAGTTGATGAA--CCCC-GGC<sup>GT</sup>AAAGA<sup>GTGC</sup>TAA-<sup>AC</sup>AGAGATCA---AAAC----  
 Etzo AAGCTGATAGA--CA-CC-GGC<sup>GT</sup>AAAGC<sup>GTGC</sup>TAA-<sup>GC</sup>ATTTTT-A--TAAAC---  
 Apse AAGCTGACAGC--TACC-GGC<sup>GT</sup>AAAGA<sup>GTGC</sup>TAA-<sup>AT</sup>AACCCCGCCA---TA-C--  
 Epde AAGTTGACAGA--CATC-GGC<sup>GT</sup>AAAGC<sup>GTGC</sup>TAA-<sup>AC</sup>ACAAATT-GAAG---AC--  
 Slja AAGTTGATAG--A--CGC-GGC<sup>GT</sup>AAAGC<sup>GTGC</sup>TAA-<sup>GC</sup>GGAAT-----AACAC--  
 Bsja AAGTTGTTAAA--TCA-C-GGC<sup>GT</sup>AAAGA<sup>GTGC</sup>TAA-<sup>AA</sup>ATGTATTAA-----A-AAA  
 Ecna GAGTTGACAGA--TAAC-GGC<sup>GT</sup>AAAGC<sup>GTGC</sup>TAA-<sup>AC</sup>GGTGCCTAA-----AC  
 Cohi AAGTTGACAG--AATAC-GGC<sup>GT</sup>AAAGG<sup>GTGC</sup>TTAG-<sup>GC</sup>AAT-ATTAATA-C-----  
 Caar AAGTTGACAGA--CAA-C-GGC<sup>GT</sup>AAAGA<sup>GTGC</sup>TAA-<sup>GC</sup>GAAATACATA---AC---  
 Came AAGTTGACAG--ACAAC-GGC<sup>GT</sup>AAAGC<sup>GTGC</sup>TAA-<sup>GC</sup>AAAA-T-ATGTAAC-----  
 Mema AAGTTGATAA--ACAGC-GGC<sup>GT</sup>AAAGA<sup>GTGC</sup>TAA-<sup>GC</sup>AACAC-TGACA-AAC-----  
 Lenu AAATTGACAGT--ACC-C-GGC<sup>AT</sup>AAAGT<sup>GTGC</sup>TAA-<sup>AC</sup>AAATAA-AC-----ACAA-  
 Plma AAGTTGACAGA--C-ACC-GGC<sup>GT</sup>AAAGC<sup>GTGC</sup>TAA-<sup>GC</sup>AAAAAC-----TAAAC-  
 Emst AAGTTGTTAGA--TACC-GGC<sup>GT</sup>AAAGA<sup>GTGC</sup>TAA-<sup>AC</sup>ATAAGTCAGACAC-----  
 Ptti AAGTTGATAGA--CACC-GGC<sup>GT</sup>AAAGA<sup>GTGC</sup>TAA-<sup>AC</sup>ACTTACTTA---ACAC---  
 Losu AAGTTGTTAGA--C-ATC-GGC<sup>GT</sup>AAAGC<sup>GTGC</sup>TAA-<sup>GC</sup>TA-ATTAAT--T--ATCCAG  
 Geoy AAGTTGACCAC--C-ACC-GGC<sup>GT</sup>AAAGC<sup>GTGC</sup>TAA-<sup>GC</sup>TTTATGTAC-A-ATATGAC  
 Dipi AAGTTGATAG--C-ATC-GGC<sup>GT</sup>AAAGG<sup>GTGC</sup>TAA-<sup>AC</sup>ACAAATCAA-----ATAC-  
 Pama AAGTTGTTAAA--A-ATC-GGC<sup>GT</sup>AAAGG<sup>GTGC</sup>TAA-<sup>AC</sup>AG-CAAGCT--TAAAAT--  
 Leob AAGTTGACAC--CA-TC-GGC<sup>GT</sup>AAAGA<sup>GTGC</sup>TAA-<sup>AC</sup>ATTAGC-C--CTCCAT---  
 Neba GAGTTGACAT--CCC-C-GGC<sup>GT</sup>AGAGC<sup>GTGC</sup>TAA-<sup>AA</sup>CATATTTGC-----AAAC-  
 Pdpi AAGTTGACAG--TCCAC-GGC<sup>GT</sup>AAAGG<sup>GTGC</sup>TTAG-<sup>GC</sup>AAT-T-CTATTAAC----  
 Nimi AAGTCGATAGT--CCA-C-GGC<sup>GT</sup>AAAGA<sup>GTGC</sup>TTAG-<sup>AC</sup>AACC-CCAATTAC-----  
 Uptr AAGTTGATAG--C-ATC-GGC<sup>GT</sup>AAAGG<sup>GTGC</sup>TTAG-<sup>GC</sup>AAAAC-----ATACAA--  
 Pesc GAGTTGACAT--CA-TC-GGC<sup>GT</sup>AAAGA<sup>GTGC</sup>TAA-<sup>GC</sup>ATGTTA-C--CAA-AC--  
 Baar AAGTTGACAAA--CAC--GGC<sup>GT</sup>AAAGA<sup>GTGT</sup>TAA-<sup>AC</sup>GTAACCAAAGA----AG--  
 Moar AAGTTGATAGA--CA-TC-GGC<sup>GT</sup>AAAGA<sup>GTGC</sup>TAA-<sup>GA</sup>CAGATC-T---C--GCAC-  
 Toja AAGTTGATAGA--CA-GC-GGC<sup>GT</sup>AAAGA<sup>GTGC</sup>TAA-<sup>GC</sup>ACAACC---A---AAA-AC-  
 Chau AAGTTGACAT--CAT-C-GGC<sup>GT</sup>AAAGA<sup>GTGC</sup>TAA-<sup>AC</sup>ATGTA--TAAAAAC-----  
 Chse AAGTTGTTAAA--GTATC-GGC<sup>GT</sup>AAAGC<sup>GTGC</sup>TAA-<sup>AC</sup>ACAACCTCAAAC----AC--  
 Enar AAGTTGATAGA--CCTC-GGC<sup>GT</sup>AAAGA<sup>GTGC</sup>TAA-<sup>AC</sup>ATAAGA---TTAA-AAC-  
 Hpty AAGTTGATAA--ATATC-GGC<sup>GT</sup>AAAGC<sup>GTGC</sup>TAA-<sup>AC</sup>ATA----GACTGAAAC---  
 Nana AAGTTGAGGAA--CAAC-GGC<sup>GT</sup>AAAGA<sup>GTGC</sup>TAA-<sup>AA</sup>ATAA----ATCTCAAAC--  
 Mcst AAGTTGATAGA--C-TAC-GGC<sup>GT</sup>AAAGA<sup>GTGC</sup>TAA-<sup>AC</sup>ATAT-ATTTTAAAC-----  
 Rhox AAGTTGATAG--ACTAC-GGC<sup>GT</sup>AAAGC<sup>GTGC</sup>TAA-<sup>GC</sup>AAA-A-CTATAAAAC----  
 Opfa AAGTTGATAGA--CTC-C-GGC<sup>GT</sup>AAAGC<sup>GTGC</sup>TAA-<sup>AC</sup>ACAAATTTT---AAAC---  
 Paar AAGTTGACAGC--CTAC-GGC<sup>GT</sup>AAAGG<sup>GTGC</sup>TAA-<sup>GC</sup>AAAAAAACA-AAAC-----  
 Gozo AAGTTGATAA--CCC-C-GGC<sup>GT</sup>AAAGA<sup>GTGC</sup>TAA-<sup>AC</sup>ATAGATTAA-----ACAC-  
 Ackr AAGCTGATAGC--C-ATC-GGC<sup>GT</sup>AAAGA<sup>GTGC</sup>TAA-<sup>GC</sup>AAAAACA-----GAAC---  
 Elev AAGTTGTAAAGA--CAT-C-GGC<sup>GT</sup>AAAGG<sup>GTGC</sup>TAA-<sup>GC</sup>A-AAGTTA-----AAAC-  
 Trdu AAGTTGACAGA--CAT-C-GGC<sup>GT</sup>AAAGA<sup>GTGC</sup>TAA-<sup>GC</sup>AAGTTTTT---A-AAC---  
 Amoc AAGTTGACAGA--CAAC-GGC<sup>GT</sup>AAAGA<sup>GTGC</sup>TTAG-<sup>GC</sup>AAA-----TTTTAAAC-  
 Hame AAGTCGATGAC--CTTC-GGC<sup>GT</sup>AAAGC<sup>GTGC</sup>TAA-<sup>GC</sup>ACAAACCTA---AAAC---  
 Chso AAGTTGAAAAC-ATTC-GGC<sup>GT</sup>AAAGG<sup>GTGC</sup>CTAA-<sup>GC</sup>ACCTATT-----TCAAAC-  
 Lyto AAGTTGAAAAG--ACCC-GGC<sup>GT</sup>AAAGA<sup>GTGC</sup>TAA-<sup>AC</sup>TTAG-AAT-TTTAC-----  
 Encr AAGTTGACAG--ACATC-GGC<sup>GT</sup>AAAGA<sup>GTGC</sup>TAA-<sup>AC</sup>TTAAA---ATTGT----AC

Bvar AAGTTGATAGA--A-CCC**GGCGT**AAAGC**GTGC**TTAGG**GC**T-AAC-ACAAAC-AT----  
 Noco AAGTTGATTAT--TCAC-**GGCGT**AAAGA**GTGC**TTAG-**GC**AACAA----ATAG--TAC-  
 Chsp AAGCTGACTT---TTTCC**GGCGT**AAAGG**GTGC**TTA--**AA**TAAAAT-AAAT---AC---  
 Arja AAGTTGATAGC--C-GGC**GGCGT**AAAGA**GTGC**TTA--**AC**TTTAAACT-----CACAC  
 Pase AAGTAGATAG--TT-AC**GGCGT**AAAGT**GTGC**TTAA-**GC**AAATAT-A--CTAAAA---  
 Trel AAGTTGACAGA--C-AGC**GGCGT**AAAGG**GTGC**TTA--**GA**AGAACTT-----CACAC--  
 Lifa AAGTTGATGCG--TGTC-**GGCGT**AAAGT**GTGC**TTA--**GC**AGACAATTT---GAAC---  
 Acur AAGTTGATAGA--TTT-C**GGCGT**AAAGA**GTGC**TTA--**AC**AATTTTATA-----AAAG-  
 Ampe AAGCTGATAGA--CCC-C**GGCGT**AAAGA**GTGC**TTAA-**GC**TAAA-CTTAAAA-----  
 Urja AAGCTGATAGC--CCAAC**GGCGT**AAAGA**GTGC**TTAA-**GC**GAGT-A-TTTTCAA-----  
 Enet AAGTTGATAG---TATTC**GGCGT**AAAGA**GTGC**TTA--**AA**CTAGACT-TAAA----C--  
 Ptbr AAGCTGACAC--TCTTC**GGCGT**AAAGG**GTGC**TTA--**AA**ATAA-CA-ACTT---AT--  
 Safa AAGCTGACAGA--CCCTC**GGCGT**AAAGT**GTGC**TTA--**AA**TAGT-----GTA-CCTAC-  
 Icae AAGTTGACAG---ATATC**GGCGT**AAAGC**GTGC**TTAA-**GC**TAA-A-CTA--AAAC---  
 Asmi AAGCAGACA---TACCC**GGCGT**AAAGA**GTGC**TTT--**AT**TTA-----AATTTTAC---  
 Foal AAATTGATAAA--TAC--**GGCGT**AAAGG**GTGC**TTA--**GA**TTTA----ACTTAAAAAC--  
 Drze AAATTGATAAA--C-AAC**GGCGT**AAAGA**GTGC**TTA--**GC**AATTTAA-----ATGAAC  
 Rhas AAGCTGATAGA--CGCC-**GGCGT**AAAGG**GTGC**TTA--**AC**AAATAACA----AAAC---  
 Elac AAGTTGATGCG--CCCTC**GGCGT**AAAGA**GTGC**TTA--**AC**AAATATAACAC-----  
 Kugu AAGTTGATAGA--TGA-C**GGCGT**AAAGA**GTGC**TT--**AC**ATATTAAC-----AAAAC  
 Plor AAGTTGATAAA--C-ACC**GGCGT**AAAGA**GTGC**TT--**AT**GACTAAC-AATTAAC--  
 Sgun AAGTTGATAGA--CAG-C**GGCGT**AAAGC**GTGC**TTA--**AC**AACAAAACC-----TAAAC  
 Zaco AAGTTGTTAGA--TAC-C**GGCGT**AAAGA**GTGC**TTA--**AC**ATAAATT-----ATAGAC  
 Zbfl AAGTTGTTAGA--CACC-**GGCGT**AAAGA**GTGC**TTA--**GC**TACTA----TACT-TAC-  
 Spba AAGTTGACAGA--CCG-C**GGCGT**AAAGC**GTGC**TTAA-**GC**AAAAACAAAA----AC---  
 Game AAGTTGACAGA--C-ACC**GGCGT**AAAGC**GTGC**TTAA-**GC**TAAAC----TTAAAC----  
 Thth AAGTTGACAGA--CACC-**GGCGT**AAAGC**GTGC**TTAA-**GC**TATACCAAAC--AC-----  
 Xigl AAGTTGACAGA--C-AAC**GGCGT**AAAGA**GTGC**TTAA-**GC**AAACCA-AAAA---C---  
 Hyja AAGTTGACAG---ACGCC**GGCGT**AAAGT**GTGC**TTAA-**GC**AAAAT-T-TTA-AAC----  
 Psan AAGTTGACAGA--CA-TC**GGCGT**AAAGA**GTGC**TTA--**GC**GGGAATTC-T--TAAAC-  
 Cupa AAGTTGACAGA--CGCC-**GGCGT**AAAGC**GTGC**TTAA-**GC**TAAACTAC-AAC-----  
 Mpch AGGTTGATAAT--TAA-C**GGCGT**AAAGA**GTGC**TTA--**AA**TTAACAAC-----AAAAC-  
 Char AAGTTGATA---GTCAC**GGCGT**AAAGA**GTGC**TTA--**AC**AAAA-ACTATAAAC-----  
 Pser AAGCTGACAGA--CAAC-**GGCGT**AAAGA**GTGC**TTA--**GC**GATTACAAA---AAA----  
 Prol GAGTTGACAGA--C-AGC**GGCGT**AAAGG**GTGC**TTA--**GC**GGGTTGA---CCAAAC--  
 Plbi AAGTTGACAAA--C-AAC**GGCGT**AAAGA**GTGC**TTA--**GC**GGATT-TACTAA-AC---  
 Calu AAGTTGACAGA--ACCAC**GGCGT**AAAGG**GTGC**TTAA-**GC**AGGAATAT---ACAC---  
 Papa AAGTTGATAGT--CAA-C**GGCAC**AAAAG**GTGC**TTA--**GC**TAGAACACT----A-AAT-  
 Sufr AAGCTGACAGA--CTATC**GGCGT**AAAGA**GTGC**TTA--**AC**AGAAACA-CAGCTAAAC--  
 Stci AAGCTGATAGA--C-ACC**GGCGT**AAAGC**GTGC**TTA--**GC**AATATTTAA-T--ACAAT-  
 Taru AAGTTGTTAGC--C-AAC**GGCGT**AAAGG**GTGC**TTA--**GA**ACTAAAA-ACAACAAAC--  
 Rala AAGTTGTTAGT--CC-TC**GGCGT**AAAGA**GTGC**TTA--**GC**AATAGCCT-A--CAG-AC-

\*\*\* \* \*\*

|      | 21     | 22            | 23  | 23'  | HVR | 22'        | HVR |          |     |                |
|------|--------|---------------|-----|------|-----|------------|-----|----------|-----|----------------|
| Scca | TATAGT | TA--TGACCT--- | CAT | -CAA | GC  | TGT--TATAC | GC  | A--TTC-- | GTC | AACGGAAT-AAT-  |
| Muma | TAAAGT | TT--AGACCT--- | CAT | -AAA | GC  | TGTT--ATAC | GC  | AC--TC-- | ATC | AGTGGA--ATAAT  |
| Erca | TAAGGA | TA--AAATAT--- | CTT | -AAA | GC  | TGTC--ATAC | GC  | -TAA-A-  | AAA | TATATG--AAAA   |
| Pose | GAGAAC | AA--AATACC--- | TTT | -A-A | GC  | TGT--CATAC | GC  | T-A-AT-- | AAG | TATATGA--ATAT  |
| Actr | TAGAGC | CA--AAAGCC--- | TCC | -TAA | GC  | CGT--CATAC | GC  | A-CCT--- | GAA | GGCCGA--AGCC   |
| Scal | TAGAGC | CA--AAAGCC--- | CCC | -CAA | GC  | TGT--CATAC | GC  | A-CCT--- | GAG | GGCCGA--AGCC   |
| Posp | TAGAGT | CA--AAACCC--- | CCC | -TAA | GC  | TGTC--ATAC | GC  | ATT-T--- | GGA | GGCTC-G-AAGCC  |
| Atsp | TAAAGT | CA--AAATCC--- | TCC | -TAA | GC  | TGTC--ATAC | GC  | ACT-T-G- | GGA | GC-ATGA--AGCC  |
| Leoc | TAAAGT | CA--AAATCT--- | CCC | -TAA | GC  | CGTC--ATAC | GC  | ACT---T- | GGC | AGCATGA--AGCC  |
| Amca | TAAAGC | GG--AAATCT--- | CTC | -TCG | AC  | CGTT--ATAC | GT  | ATA--T-  | GAA | AAGATGA--AAAT  |
| Osbi | TAAAGC | CA--AAACCT--- | CTC | -AAA | GC  | CGTT--ATAC | GC  | ATA--TC- | GAG | ACTCGTA--GGTC  |
| Pabu | TAAAGT | TA--AATACC--- | TTT | -CAG | GC  | TGTT--ATAC | GT  | ACT-CC-  | GAA | GACTIONA--AAAC |
| Hial | TAAAGC | CA--AAAACC--- | CTC | -CGG | GC  | CGT--CATAC | GC  | A--TC-C- | GAG | GGCCGA--GGCC   |
| Elha | TAAAGC | CA--AAGCCC--- | TTT | -CCG | GC  | TGT--CATAC | GC  | A-CCC--- | GAA | GGCATGA--GGCC  |
| Mlcy | TAAAGC | CA--AAACTC--- | CTC | -CCA | GC  | TGTC--ATAC | GC  | AC-C-C-  | GAA | GACAAG--AGCC   |
| Algl | TAAAGC | CG--AAGACC--- | TCC | -TGG | GC  | TGT--TTTAC | GC  | A-TCT--- | GGC | GGCTATTA-AGCC  |
| Ptgi | TAAAGC | CG--AATACC--- | CCT | -CAG | GC  | TGT--TATAC | GC  | ATCT---G | GGC | GAAATGA--AGCC  |
| Alaf | TAAAGC | CG--AACCCC--- | CCT | -TAG | GC  | CGTC--ATAC | GC  | TTC--T-  | AGC | GACATGA--AGCC  |
| Nock | TAAAGC | CG--TACCCC--- | TCT | -TAG | GC  | CGTC--ATAC | GC  | TT-CT--- | AGA | GATGTG--AAGCC  |
| Anja | TAAAGC | CA--AACACT--- | TCC | -CAA | GC  | TGTC--ATAC | GC  | TAC-C--- | GGA | TAAAACG-AAGCC  |
| Gyki | TAGAGC | CA--AACACC--- | CCT | -TAT | GC  | TGTC--ATAC | GC  | CAT--G-  | GGC | GTCACGA--AGAT  |
| Syka | TAAAGC | CA--AACACC--- | TCC | -CAA | GC  | TGTC--ATAC | GC  | AATC---G | GGA | GGCAGGA--GGCC  |
| Opma | TAAAGC | CG--AACACC--- | TCC | -TTA | AC  | TGTT--ATAC | GT  | TTA-AA-  | GAG | AC-ACG--AAGCC  |
| Comy | TAAAGA | AG--AACAGC--- | TTT | -CAT | GC  | CGTA--TCAA | GC  | TTA---C- | AAA | GACCTGA--AAAA  |
| Sasp | TAAAGC | TA--AACACC--- | CCC | -TAA | GC  | TGTA--ATAC | GC  | CCC-C--- | AAG | AGGTAG--AGAAT  |
| Eupe | TAAAGC | CA--AACGCA--- | CCC | -CCA | AC  | TGTA--ATAC | GC  | CTCC---G | GGC | AGACAGA--AAAT  |
| Enja | TAAAGC | AG--AAAACC--- | TCT | -CAA | AC  | TGT--TATAC | GC  | A--C-CC- | AGA | GGTTGAA--ACCC  |
| Same | TAAAGC | CG--AAGACC--- | TCT | -TAG | GC  | CGT--CATAC | GT  | A-CCT--- | AGA | GGCTCGA--ATAA  |
| Chch | TAAAGC | CA--AACGCC--- | TCC | -CAG | GC  | TGTC--ATAC | GC  | ATC-C--- | GGA | GGTACG--AAGCC  |
| Grgr | TAAAGC | CA--AAGGTC--- | CCC | -TAA | GC  | CGTT--ATAC | GC  | ATT-TC-  | GGA | GACATTA--GACC  |
| Caau | TAAAGT | CA--AATGGC--- | CCC | -TTG | GC  | CGTC--ATAC | GC  | TT-CT--- | AGC | CGTCCG--AAGCC  |
| Cyca | TAAAGT | CA--AATGGC--- | CCC | -TTG | GC  | CGT--CATAC | GC  | T-TCTA-  | GGA | GTCC-GA--AGCC  |
| Dare | TAAAGC | CA--AACGGC--- | CCT | -TTA | AC  | TGTT--ATAC | GC  | TTT-T--- | AGA | TGCTAGA--GGCC  |
| Cost | TAAAGC | CA--AAAGAC--- | CTC | -TTG | GC  | TGTC--ATAC | GC  | CCC-T--- | GAG | TGTCTGA--AGAC  |
| Leec | TAAAGC | CA--AAGGGC--- | CTC | -TTG | GC  | CGT--CATAC | GC  | T-TACT-  | GAG | TGTCCGA--AGCC  |
| CrIa | TAAAGC | CA--AGGGAC--- | CTC | -TTG | GC  | CGTC--ATAC | GC  | TT--CT-  | GAG | TATCCA--AAGC-  |
| Clmc | TAAAGC | CA--AAGACC--- | TCC | -CAA | GC  | TGTC--GCAC | GC  | ACC-CC-  | GGA | GGCACGA--AGCC  |
| Phin | TAAAGC | CA--AAAACT--- | TCC | -CAA | GC  | TGTC--GCAC | GC  | ACA--AC- | GGA | AATAAAA--AGCC  |
| Icpu | TAAAGC | TA--AAGACC--- | CCC | -TGG | GC  | CGTC--ATAC | GC  | ATT-TC-  | GGC | GGCACGA--AACC  |
| Psto | TAAAGC | TA--AAGACC--- | CTC | -TAA | GC  | TGTC--ATAC | GC  | ACC-CC-  | GAG | AGCACGA--AACC  |
| Cora | TAAAGC | TA--AAGACT--- | TAC | -CAA | GC  | CGTC--ATAC | GC  | CCA-T--- | GGA | AGAACGA--AAAC  |
| Eisp | TAAAGT | CA--AATGTT--- | TCC | -TAG | GC  | CGT--TATAC | GT  | T--TTCT- | AGA | AACATGA--AGCC  |
| Apal | TAAAGC | CA--AACACC--- | TCC | -CAG | GC  | CGT--TGCAC | GT  | T-TTCT-  | GGA | AACACGA--AGCC  |
| EsLu | TAAAGC | CG--AACACC--- | TCC | -TCA | GT  | TGT--TATAC | AC  | TT-T---  | GAA | GATATGA--AGCC  |
| Dape | TAAAGC | CA--AACACC--- | TTT | -TCA | GT  | TGTT--ATAC | AC  | ATT--T-  | AAA | GGCTTG--AAGCC  |
| Glse | TAAAGC | CG--AACACC--- | CCC | -TAG | GC  | TGTT--ATAC | GC  | AC-CT--- | GGC | AGTATG--AAGCC  |
| Naar | TAAAGC | CG--AACACC--- | CTT | -TAA | GC  | TGTC--ATAC | GC  | ACC-T--- | GAG | GGCACGA--AGCC  |
| Baoc | TAAAGC | CG--AACAAC--- | CTC | -TAG | GC  | TGT--CATAC | GC  | AC-CT--- | GAG | GCTACGA--AGCT  |
| Opso | TAGAGC | CA--AACACC--- | TCC | -TAG | GC  | TGTC--ATAC | GC  | ACC--T-  | GAA | GACAC-G-AAGCC  |
| Alte | TAAAGC | CG--AAGACC--- | CCC | -TAG | GC  | TGTC--ATAC | GC  | ACCT---G | GGA | GGCACGA--AGCC  |
| Plap | TAAAGC | CG--AAGACC--- | CCC | -TAG | GC  | TGT--CACAC | GC  | A-C-CT-  | GGC | GGCACGA--AGCC  |

Plal TAAAGCG--AACACC--CTC-CAGCGCGTT--ATACGCTTC-T--GAGGGCACG--AAGCT  
 Sami TAAAGCG--AACACC--CTC-CAGCGTGT--ATACGCTC-CC--GAGGGCGGA--AGCC  
 Rere TAAAGTGT--AATAAC--CCC-TAGCGT--TGTACGCT--CCT--GGGTAATGA--AAAT  
 Gama TAAAGCG--AATACC--TCC-AAGCGTGT--ATACGCC--GAGGTCTGA--AGCC  
 Onmy TAAAGCG--AACACC--CCC-TCACGTGC--ATACGCC--T--GGGAGCACGA--AGAC  
 Sasa TAAAGCG--AACACC--CCC-TCACGTGC--ATACGCC--T--GGGGGCACGA--AGAT  
 Cola TAAAGCG--AACACC--CCC-TTGGTGTGC--ATACGCC--T--GGGGGCACG--AAGCC  
 Dita TAGAGTGT--AACTTC--CCC-CCGTGTGC--ATACGCC--CC--GAGGAACG--GAACC  
 Gogr TGAAGTGT--AACCT--CCC-CCTCGTGT--TATACGCC--CCC--GAGAAAATAT--ACCC  
 Chsl TAAAGCG--AACATC--CCC-CAACCGTGT--GCACGCTT-AC--GAGGAATG--AAGCC  
 Atja TAAAGCG--AACCTT--CTC-CCACGTGTGC--ATACGCCAAA-C--GAGGACGA--AGCC  
 lido TAAAGCG--AACCTC--TTC-CCACGTGT--CATACGCCA-AAC--GAGGACGA--AGCC  
 Auja TAAAGTGT--AACACC--TCC-CGACGTGT--ATACGCCACA-C--GAGGACAA-G-AAGCA  
 Chag TAAAGTGT--AACACC--CCC-CTTGTGT--AATACGG--GCC--GGGGTAGGA--GACC  
 Hami TAAAGTGT--AACACC--CCC-AGACGTGT--ATACGCTC--C--GGGAGTAGGA--GGCC  
 Saun TAAAGTGT--AACACC--CCC-AGACGTGT--TATACGCT--CCC--GGGGACAGGA--AGCC  
 Nema TAAAGTGT--AACGCC--TGC-AAACCGTGT--ATACGCCACC-C--GAGGCATGA--AAAC  
 Disp TAAAGTGT--AATGCC--CAC-ACACGTGTGC--ATACGCCATC-C--GATGGCATGA--AACC  
 Myaf TAAAGTGT--AAGTAA--CTC-CAGCGTGTGC--GCACGCTC--T--GAGAATATTA--AACC  
 Lagu TAAAGCA--AACGCC--CCC-AAACCGT--TATACGCCA-CTCC--GAGGGCAGA--GGAT  
 Trtr TAGAGCC--TACGCC--CTC-ATGCGTGT--ATACGCCACC--C--GAGAGGCGGA--TGAA  
 Zucr TAGAGCC--TACATC--CCC-ATGCGTGT--TATACGCCA--CC-CGGGAATGGA--TGAC  
 Pxja TAGAGCA--AACACC--ATC-AAACGTGT--ATACGCCAC--CCGATAGTATG--AAGAT  
 Pxlo TAGAGCG--AACACC--ATC-AAACGTGT--TATACGCCA--C-CCGATAGTATGA--AGAT  
 Pctr TAGGGCG--AACCCC--CTC-TAACCGT--TATACGCCA--CAC-GAGGCATGA--AGCA  
 Apsa TAGAGCA--AACCC--TTC-TAACCGTGT--ATACGCCAAT--CCGAGGAAATGA--AGCC  
 Cabe TAAAGCG--AAGACT--ATC-AAGCGTGTGC--GCACGCTATG--TCGAGAGCGCGA--AGAA  
 Bzze TAAAGTGT--AACACC--CTC-AGACGTGT--ATACGCCAT--CCGAGGCATGA--AGAA  
 Siim TAAAGTGT--AATGCC--CCC-AAGCGTGT--GTACGCCATA--C--GGGGGTGCGA--AGCA  
 Ctru TAAAGCG--AACACC--CTC-AAACGTGT--ATACGCCAT-C--CGAGGCATG--AAGAA  
 Dpbr TAAAGCG--AACACC--CTC-AAAACGTGT--ATACGATT--CCGAGGCAT-G-AAGAA  
 Caki TAGGGTCA--AATAGC--TTC-TAACAGTGC--AAATACAT--C--GAGGCCACAA--AGCA  
 Phja TAGGATGT--AAGTGC--TTC-AAGAGTGC--ATAAGC--TT--CCGAGGTCACGA--AACA  
 Brsp TAGGATCA--AATAAT--CGC-AACCGTGTG--ATATGTTA--C--GAGATCATT--AGAC  
 Gamo TATGGCG--AACAGC--TTC-AAACAGTGT--ATACGCCATC--C--GAGGTCACGA--AGAA  
 Lolo TAGGGCG--AACAGC--CTC-AAACAGTGT--ATACGCCATT--C--GAGGCCACG--AAGCT  
 Batr TGAAGTCA--AACACT--AGC-ATAAGTAGT--GAAACTG----GTTTAGCATG-AAGC-  
 Prmy TAAAGTGT--AACATA--CTA-CCACGT--ATAACCTAAA--CAGTATATG--AAACC  
 Loli TAAAGTGT--AATGCC--CTC-AAACGTGT--ATACGCCCT--CCGAGGGCAA-G-AAGCC  
 Loam TAAAGTGT--AATGCC--CTC-AAACGTGT--ATACGCCAC--CCGAGGGTTAGA--AGTT  
 Chab TAAAGCA--AATGCC--TTC-AAAACGTGT--ATAAGCATC--CCGAGGATAA-G-AGGCT  
 Chto TAAAGCA--AATGCC--TTC-TAGCGTGT--ATAAGCATC--CCGAGGATAA-G-AGGCT  
 Majo TAAAGCG--AAC-ATC--TTC-AAAACGTGT--ATACGCC--CC--TCGAGGATTTGA--AGCC  
 Hlst TAAAGCG--AATATA--CTC-AAGCGTGT--ATAAGCTC--CCGATACAA--AGCC  
 Clpe TAGAGCA--AATGCC--CTC-AAAACGTGT--CATAAGCA--C-CCGAGGGGAAGA--AGCC  
 Mlmr TAAAGCA--AATGCC--TTC-AGACGTGT--CTACGCCAAT--T--GAGGTGAGG-AAGCC  
 Crcr TAAAGCG--AACGCC--CTC-AAGACGTGT--ATACGTTT-C--GAGGTATGA--AGAC  
 Muce TAAAGCG--AACGCC--CTC-AAGACGTGT--ATACGTTT-CC--GAGGTATGA--AGCC  
 Bege TAAAGTGT--AATACT--CTC-CAACGTGT--ATACGTTACA-C--GAGAACCA-G-AAACC  
 Mela TAAAGCA--AACACT--CTC-AGACGTGT--ATACGTTACC-C--GAGAATTAGA--GGTC  
 Hats TAAAGCG--AACACT--CTC-AGACGTGT--ATACGTTGTC-C--GAGAGCAA-G-AAGCT  
 Orla TAAAGTGT--AATGTT--TTC-AAAACGTGT--TATACGCCA--CCC--GAGAATAAGA--AGAC

Cosa TAAAGCG--AATATC---CCC-ACAGCGTGT--ATACGCAC----CCGAA GATAAG--AAGCC  
Exsp TAAAGCG--AACATC---CTC-AAGACGTGTC--GTACGT TT----CCGAG GATATG--AAGTC  
Depa TAAAGT CG--AATCAT---TTC-TAAGCGTGT--ATACGC ACT----CGAA AGTAG-G-AAGAA  
Rima TAAAGCG--AACGCT---CTC-ATAGCGTGT--TATACGT C---TTA-GAA AGTATGA--AGCC  
Fuol TAAAGT CG--AACTCT---CTC-ATGCGTGT--ATACGC ACC----CGAG AGCAT-G-AAGTC  
Gmaf TAAGACTA--AACCTT---TCC-AAAAGCGTGT--ATACGC ACC----CGGA AATATG--AAACT  
Xeei TAAAGCG--AACTCT---CTC-AAGCGTGT--ATACGC AC----CCGAG AGCATG--AAGAT  
Pros TAAAGCG--AATGCC---CTC-AGAAGCGTGT--ATAAGC ATC----CGAG AGTTCGA--AGCC  
Scmi TAAAGCG--AACGCC---CTC-AAGCGTGT--TATACGC A---TCC-GAA GGTACGA--AGCA  
Rolo TAAAGCG--AAC-GCC---CTC-AGAAGCGTGT--ATACGC ACC---C-GAA GGTATGA--AGAA  
Cere TAAAGCAA--AACACC---CCC-AAGCGTGT--ATACGC AC----CCGGA GGAATGA--GTAA  
Daga TAAAGCGG--AACCCC---ACC-AAGCGTGT--TATACGC A---CCC-GGA GACGTGA--ATAT  
Anco TAAAGCG--AACACC---CTC-AGAAGCGTGT--ATACGC AC----CCGAG AATATGA--AGCA  
Dmve TAAAGCGA--AAC-GCC---CCC-CAAAGCGTGT--GTACGC TCC---C-GGG GGTAGGA--AGCC  
Dmar TAAAGCGA--AACACC---CCC-CAAAGCGTGT--GTACGC CT----CCGGA GGTAGG--AAGCC  
Anka TAAAGCG--AACACC---CTC-AAAAGCGTGT--ATACGC AC----CCGAG GACATG--AAGCA  
Moja TAAAGCG--AACACC---CTC-AAAAGCGTGT--ATACGC ACC----CGAG GGCATG--AAGCA  
Hoja TAAAGCG--AACATT---CTC-AGAAGCGTGT--ATACGC AC----CCGAG AACATGA--AGCA  
Bede TAAAGCG--AACGCC---TTC-AAGCGTGT--ATACGC A-T---CCGAA GGTACGA--AGAA  
Besp TAAAGCG--AACGCC---CTC-AAAAGCGTGT--ATACGC ATC---C-GAA GGTACGA--AGAA  
Mysp TAAAGCGA--AACACC---TTC-AGAAGCGTGT--ATACGT ACC---C-GAA GGCATG--AAGAA  
Osja TAAAGCGA--AACACC---TTC-AGAAGCGTGT--TATACGT A---CCC-GAA GGCATGA--AGAA  
Sgro TAAAGCGA--AACACC---TTC-AGAAGCGTGT--ATACGT -AC---CCGAA GGCATGA--AGAA  
Pzpa TGGAACTA--AACACT---CCC-AAAAGCGTGT--ATAAGC ATA---T-GAG AATACGA--AGCC  
Zeja TAGGGCG--AACCTC---CAC-ACAGCGTGT--ATACGC ATA---C-GAG AATATGA--AGCC  
Zzne TAGGGCGA--AACACC---CTC-AAAAGCGTGT--ATACGC AC---ATGAG GGCTTG--AAGAT  
Zefa TAGGGCGA--AACACC---CAC-AAAAGCGTGT--TATACGC A---TGTTGAG GATTTGA--AGCA  
Acni TAGGGCTA--AACATC---CCC-AGAAGCGTGT--ATACGC AAA---C-GAG GATAT-G-AAAAT  
Ncrh TAGGGCTA--AACATC---CCC-AGAAGCGTGT--ATACGC AAA---C-GAG GATATGA--AAAT  
Agca TAAAGCG--AATACC---TTC-AAAAGCGT--TATACGT A---CT-CGAA GGTAAGA--AGCC  
Hydy TAAAGCG--AACACC---CCC-AAAAGCGTGT--TATACGC A---C-CCGGA GGTTAGA--AGTC  
Gsac TAAAGCG--AACGCC---CCC-AAAAGCGTGT--TATACGC A---TCCG GAG GTGA-GA--AGTT  
Pevo TAAAGCG--AACGCC---CCC-AGAAGCGTGT--ATACGC TCC---C-GAG AGTAGGA--AGAC  
Hiku TAAAGT TA--AACATC---TTC-CAAAGCGTGT--ATACGC ACC--C-GAA GGTATGA--GATT  
Inpa TAAAGCGA--AACACT---TCC-ACAGT CGTT--ATACGC AA---CCGAA AGTTAG--AAGAC  
Auch TAAAAC TA--AAAGAA---AAC-GGAGCGAGT--GTAACGC CAACCACC GTA TGTCGGA--GAAC  
Fico TAAAGCG--AATGCC---CCC-AAAAGCGTGT--TATACGC T---TCC-GGA GGTAAGA--AGAA  
MacS TAAAGCG--AACGCC---TCC-AGAAGCGTGT--TATACGC C---CCC-GGA GGTAAGA--AGTT  
Moal TAAAGCGA--AATTTT---CTC-CTCAGCGTGT--TATACGC A-CCC---GAG ACATAAGA-AGTA  
Syma TAAGGT CG--CACATC---CTC-ATGAGT AGT--GATACGC A---TCC-GAA CACACGA--AGCC  
Mafr TAAAGT CG--AATGCT---TTC-AAAAGCGTGT--CATACGC A---C-CTGAA AGTAAGA--AGCC  
Dcpe TAAAGT CA--AACGCC---CTC-ACTAGCGTGT--ATACGC CCC---C-GAG GGTAAGA--AGCC  
Dcti TAAAGT CA--AACGCC---CTC-ACTAGCGTGT--ATACGC CCC---C-GAG GGTAAGA--AGCC  
Hehi TAAAGCG--CACACC---TTC-AAAAGCGTGT--ATACGC AT-C---CGAA GGCAAG--AAGAC  
Stam TAAAGCG--AACACC---TTC-AAGCGAGTGT--ATACGC AC----CCGAA GGTTAGA--AGCC  
Hogi TAGAGCG--AATATC---TTC-AAGAGCGTGT--TATACGT A---CCC-GAA GATGAGA--AGTC  
Erzo TAAAGT CG--AACATC---TTC-AAGCGTGT--ATACGC AT----CCGAA GACAAG--AAGTT  
Hxot TAAAGCGA--AACATC---TTC-AAGAGCGTGT--ATACGC AA---CCGAA GACAGG--AAGTT  
Core TAAAGCGA--AACATC---TTC-AAGAGCGTGT--ATACGT AAC---C-GAA GACAGGA--AGTT  
Apve TAAAGCA--AACATC---TTC-AAGAGCGTGT--TATACGT A---CCC-GAA GACAGGA--AACT  
Latj TAAAGT CG--AACGCT---CCCTAGAGCGTGT--ATACGT GTA---C-GAG AGTACGA--AGCT  
Laja TAAAGCG--AACACC---TTC-AAGCGTGT--ATACGC ACC---C-GAA AGTAAGA--AGCT



Syja TAAAGC CG--AACACC--CTC-AGAGC TGTT--ATAAGC ATC---C-GAA GGTACGA--AGTT  
 Epme TAAAGC CG--AACGCT--TAC-TAGC TGTT--ATACGC TT---ACGAA AGTAAG--AAGCA  
 Grse TAAAGC CG--AACAAC--CTC-AATC TGTT--ATACGC A-T---CCGAA GGTACGA--AGTA  
 Clja TAAAGT CG--AACGCC--TAC-AGGAC CGTT--ATACGT ATT---CCGAA GGTATG--AAGAT  
 Ogcy TAAAGT CG--AAAATC--TTC-AAGAC TGTA--ATACGT TCC--C--GAA GATATGA--AGCC  
 Plna TAAAGC CG--AATGCT--TTC-ACGAC TGTC--GTACGT CCC---T-GAA AGTAAGA--AGCT  
 Lema TAAAGC CG--AATGCT--TTC-AAA GC TGTT--ATACGC TTC--C--GAA AGTAAGA--AGCC  
 Etzo TAAAGC CG--AACACC--CTC-AGAGC TGTT--ATACGC ACC---C-GAA GGTAAAG--AAGAC  
 Apse TAAAGC CG--AACATC--TCC-AAA GT TGTA--CAACGC ACT--C--GAA GACATGA--AGAC  
 Epde TAAAGC CG--AACCCC--CTC-AAA GC TGT--TATACGC A---TC-CGAG GGC AAGA--AGCT  
 Slja TAAAGT CG--AATTGC--CTC-CTAGC AGT--TATACGC T---CAC-GAG GGCTTAGA-AGCA  
 Bsja TAGAGC CG--AACACT--TAC-AAA GT TGTT--ATAAGC AC---ACGAA ATTAAGA--AGCC  
 Ecna TAAAGC CG--AATATC--TCC-AGGAC TGTT--ATACGT -TT---CCGGA GAAACGA--AGAT  
 Cohi TAAAGC CG--AACACC--TTC-CAA GC TGT--TATACGC T---TAT-GAA GAACTGA--AGCA  
 Caar TAAAGC GG--AACACC--CTC-ACA GC TGTT--ATACGC TTC---C-GAG GGCATGA--ACCA  
 Came TAAAGC GG--AACCTC--CTC-CTAGC TGTT--ATACGC TT---CCGAG GAAGTG--AACCC  
 Mema TAAAGC CA--AACACT--TTC-AGA GC TGT--TATACGC A---CCT-GAA AGCATGA--AGCC  
 Lenu TAAGGC CA--AACTCT--TTC-AAG GC TGTT--ATACGC AAC---CGAA AGAAAGA--AGAT  
 Plma TAAAGC CG--AACACC--TTC-AGG GC AGTT--ATACGT TT---CCGAA GGTACG--AAGCC  
 Emst TAAAGT CG--AATACC--TTC-AGA GC TGTT--ATACGC ACC---C-GAA GGC AAGA--AGTT  
 Ptti TAAAGC CG--AACGCC--TTC-AGA GC TGTT--ATACGC ATC--C--GAA GGTAAAGA--AGCC  
 Losu TAAAGC CG--AACGCC--TTC-TAGC TGTC--ATACGT GTATTTGC GAA GGTGAG--AAGCC  
 Geoy TAAAGT CG--AACTCC--TTC-AAG GC CGTT--TAACGT GT---TCGAA AGGGAG--AAGCA  
 Dipi TAAAGC CG--AATACC--TTC-ACA GC TGTC--ATACGC AAC---ACGAA GGCTAGA--AGTT  
 Pama TAAAGC CG--AACGCC--TTC-TAGC TGTT--ATACGC ATC---C-GAA GGTAAAG--AAGCC  
 Leob TAAAGT CG--AATGTC--TTC-AAG GC TGTT--ATACGC ACC---C-GAA GACTAG--AAGCC  
 Neba TAAAGC CG--AAAACA--TTC-ACA GC AGTC--ATACGC AT-----GAA AGTAATA--AGCC  
 Pdpi TAAAGC CG--AACGCT--TAC-AAA GC TGT--TATACGC A---CAC-GAA AGTAAGA--AGAT  
 Nimi TAAAGC CG--AACCCC--TTC-AAG GC TGT--TATACGC A---CACC-GAA GAGGAGA--AGCC  
 Uptr TAAAGC CG--AACATC--TTC-AAA AC TGTT--ATACGC CC---TCGAA GATCTG--AAGCC  
 Pesc TAAAGC CG--AACGCC--GTC-CAA GC TGTT--ATACGC GTT---TGAT GGTAAG--AAGCA  
 Baar TAAAGC CG--AACGCC--CTC-AAA GC TGTC--ATACGC ATC---C-GAG GGTGACGA-AGCC  
 Moar TAAAGC CG--AACGCC--CTC-AAA GC TGTT--ATACGC ACC---C-GAG GGT-A-AGAAGTT  
 Toja TAAAGC CG--AACGCT--CTC-AAA GC TGTT--ATACGC ACTA---CGAA AGTATG--AAGCT  
 Chau TAGAGC TA--AATACC--CTC-AAA GC TGT--TATACGC T---C-TGAA GGTAAAGA--AGCC  
 Chse TAAAGC CG--AAC-ACC--TTC-TCT AC TGTT--ATACGT TCC---C-GAA GGTAAAGA--AGCC  
 Enar TAAAGC CG--AATGTC--TCC-AGA GC TGTT--ATAAGC ACC---CGGA GATAA-G-AAGTT  
 Hpty TAAAGC CG--AACGCC--CTC-AGA GC CGT--TATACGC A---CCC-GAA GGTAAAGA--AGAC  
 Nana TAAGGT TG--AATATT--TTC-AGG GC TGTT--ATACGC AAC---CGAA AACAA-G-AAACC  
 Mcst TAAAGC CG--AACGCC--CTC-AAA GC TGT--TATACGC C---TTC-GAG GGTAAAGA--AGCC  
 Rhox TAAAGC CG--AATGCC--CTC-AGA GC TGT--TATACGC T---CAC-GAT GGTTAGA--AGCC  
 Opfa TAAAGC CG--AACGCC--CTC-AGA GC TGTT--ATACGC -TC---CCGAG GGTAAAGA--AGCC  
 Paar TAAAGC TA--AATGCC--CCC-CCG GC TGTT--ATACGC TCT---C-GGG GGTAAAGA--AAAT  
 Gozo TAAGGC CG--AACGCC--CCC-TAGC TGTT--ATACGC ATC---CGGG GGTAAAGA--AGTT  
 Ackr TAAAGC CG--AACAGA--TTT-GAG GT TGTT--ATACGC GTA---C-AAAT ACCCG--AAGCC  
 Elev TAAAGC CG--AATACT--ATC-AAG GC TGTT--ATACGC GC---CCGAT AATAAGA--AGAT  
 Trdu TAAAGC CG--AACGCC--CTC-AGA AC TGTT--ATACGT AC---CCGAG AGCAAGA--AGCC  
 Amoc TAAAGC CA--AACGTC--CTC-AAA GC TGTT--TAACGC TC---CCGAG TTAA-G--AAGAT  
 Hame TAAAGA TA--AACGAT--TTC-AAA GC TGTT--ATACGC TCA--T--GAA AATCTGA--AGAT  
 Chso TAGAGC TA--AATTTT--TTC-AAA GC TGTT--ATACGC TCA--T--GAA AACCGA--AAAT  
 Lyto TAAAGC CG--AACATC--CTC-ACG GC TGT--TATACGC A---CCC-GAG GATAAGA--AGCT  
 Encr TAAAGC CG--AAC-ATC--CTC-CAG GC TGTT--ATACGC -AT---CCGAA GATAAGA--AGTT

Bvar TAAAGCG--AATACC--TTC-AAAAGTGT--TATACCA---T-ATGAGGGTGAGA--AGTC  
 Noco TAAAGCG--AATGTT--TTC-AAAAGTGT--ATACCAATC---CGAAACAA-G-AAGTT  
 Chsp TAAAGCG--AATGCTT--CTT-AAAAGTGT--CATACCACTTT---ATAAGCAAGA--AGCC  
 Arja TAAAGCA--AACATC--TTC-AAGACTGT--ATACCAACA---C-GAAGGCAGG--AAGTT  
 Pase TAAAGCG--AACACC--CTC-CAGACTGT--ATACCAATAC---TGAGGTAAAT-AAACA  
 Trel TAGAGCG--AACGCC--TCC-AGCACTGT--TAAAGCA-C---CCGAGGTAAAGA--AGTG  
 Lifa TAGAGTG--TATGGA--CCC-CGACCTGT--TAAGCACTTA---GACCGGTAAAGA--AAGT  
 Acur TAAAGTAG--AACCT--TTC-AAAAGTGT--ATACCAAT---TGAAAT-TGTGA--ACCC  
 Ampe TAAAGCG--AACACC--CTC-ACAAGTGT--TATACCA-C-CC-GAGAGTAAGA--AGCC  
 Urja TAAAGCG--AGAATC--AAC-AAAAGTGT--ATACCAAC---CCGAAAAA-A--AAGAC  
 Enet TAAAGCG--AACTCC--CTC-ATGACTGT--TATACCA---CCC-GAGGTAAAGA--AGCC  
 Ptbr TAAAGTCA--AACTCC--TCC-CTAACGT--TGTACCA---TT-TGAGGTAAAGA--GGTC  
 Safa TAAGGTG--AATGCA--GTC-AAAAGTGT--ATACCAAT---CGAATGCTA-G-AAGCC  
 Icae TAAAGCG--AACACC--TTC-AGGACTGT--TATACCA---TCC-GAAGGCACGA--AGCC  
 Asmi TAGAGCA--AATACC--CTC-AAGACTGT--TATACCA---TTC-GAAGATATAGA-AGCC  
 Foal TAGGGCG--AACTCT--CCC-CTGACTGT--GTACCACTAC---GGAATGAAG--AAAAC  
 Drze TAAAGCA--TACACC--CTC-TTACTGTG--ATACCACTG---ATGAAAGGGGG--AGGAT  
 Rhas TAAAGCG--AACTTC--TCC-AAGACTGT--ATACCAACC--C--GGAAGAAATGA--AGAA  
 Elac TAAAGCA--AACACC--TTC-ATACTGT--CATACCA---CTT-GAAGACAGGA--AGAC  
 Kugu TAAAGCG--AATATC--TTC-AAGACTGTG--GTAAACAC---CCGAGATTGA--AGCC  
 Plor TAAAGCG--AACGCT--CTC-AGACTGT--TATACCA---T-CCGAAAGTAAGA--AGCC  
 Sgun TAAAGCG--AACACT--CTC-AAAAGTGT--ATACCAAC---TCGAGAGTATGA--AGTC  
 Zaco TAAAGCG--AACGCC--CTC-AGACTGT--ATACCACTT---CCGAAAGTGAGA--AGTC  
 Zbfl TAAAGCG--AACACC--TTC-AAAAGTGT--ATACCAACC---TGAAAGATAG-G-AAGTT  
 Spba TAAAGCG--AACGAC--CTC-AAGACTGT--ATACCACTC---CGAAGGTACGA--AGCT  
 Game TAAAGCG--AACACC--TTC-AGGACTGT--ATACCAATC---CGAAGGCACG--AAGCC  
 Thth TAAAGCG--AACACC--TTC-AGGACTGT--ATACCAATC---C-GAAGGCACGA--AGCC  
 Xigl TAAAGCG--AACGCT--CTC-AGACTGT--TATACCA---T-CCGAAAGTATGA--AGCC  
 Hyja TAAAGCG--AACGCC--TTC-AAGACTGTG-TGAATCA---TTC-GAAGGTACGA--AGCC  
 Psan TAAAGCA--AACGCC--TTC-AAAAGTGTG-CGAATCAAT---CGAAGGTACG--AAGCC  
 Cupa TAAAGCG--AATACC--TTC-AAGACTGT--ATACCAAT---C-GAAGGCACGA--AGCC  
 Mpch TAAGGCG--AAAATT--TTC-ACAAGTGT--ATACCAACT---C-GAAGATAAGA--AGCT  
 Char TAAAGCG--AACACC--TTC-AAAAGTGT--TATACCA---TTC-GAAGTAAGA--AGCC  
 Pser TAAAGCG--AACGCT--CTC-TAAGTGT--ATACCAAGCA--TGCAGAGTATGA--AGCC  
 Prol TAAGGCG--AACGCT--CCC-AAAAGTGT--ATAAGCAACC---C-GGAGTATG--AAACC  
 Plbi TAGAGCG--AACGCT--TTC-AAAAGTGT--TATACCA---C-CCGAAAGTATGA--AACC  
 Calu TAAAGTGA--AAAGAA--TTC-AGACTGTG--ATAAGCA---C-GAAGACATGA--AGAA  
 Papa TAAGGTG--AACGCTT--TTCCTTACTGT-T-ATAAGCTC-C---TAAAGTATGA--AAAC  
 Suf TAGAGCG--AATGCT--TTC-AAGACTGT--TTTACCA---CC-CGAAAGCAAGA--AGAA  
 Stci TAAAGCG--AATGCT--TTC-AAGACTGT--ATACCAAT---CCGAAAGCTAG--AAGTA  
 Taru TGAGCG--AACACC--TTC-AAGACTGT--TATACCA---TCC-GAAGCAACGA--AGAA  
 Rala TAAAGCA--AACATC--TTC-AAAAGTGT--ATACCACT---CGAAGACAAG--AAGAC

|      | !HVR!   | 24 | 24' | 21'   | !          | HVR            | !20'          | 19'       |      |
|------|---------|----|-----|-------|------------|----------------|---------------|-----------|------|
| Scca | CAACA-  | AC | --- | GAAA  | GTGACTCTA  | AAT-TACCAGGAAT | CTTGATG       | -----TCAC | GACA |
| Muma | CAACA-  | AC | --- | GAAA  | GTGACTTTA  | CATATTA        | -GGAGCCTTGATG | -----CCAC | GATA |
| Erca | CATTA-  | AC | --- | GAAA  | GTTACCTTAT | -----A--TA     | AGTGAAC       | -----CCAC | GAAA |
| Pose | CATTA-  | AC | --- | GAAA  | GTTATCTCA  | T-TAAA         | -----TGTGAAC  | -----CCAC | GAAA |
| Actr | CAACC-  | AC | --- | GAAG  | GTAGCTCTA  | CCTAACAAGGACCC | CTTGAAC       | -----CCAC | GACA |
| Scal | CAACC-  | AC | --- | GAAG  | GTAGCTCTA  | CCCAGCAAGGATCC | CTTGAAC       | -----CCAC | GACA |
| Posp | CAACC-  | AC | --- | GAAG  | GTAGCTCTA  | CCTACAAG-GACCC | CTTGAAC       | -----CCAC | GACA |
| Atsp | CCTCC-  | AC | --- | GAAG  | GTAACTTTA  | TAACCCACAGCCAC | CCCTGAAC      | -----TCAC | GATA |
| Leoc | CCTCC-  | AC | --- | GAAG  | GTAACTTTA  | TAGCCTACAGCCAC | CCCTGAAC      | -----TCAC | GATA |
| Amca | CAACC-  | AC | --- | GAAA  | GTAGCTTTA  | TACAAAACAGCCAC | CTTGAAC       | -----TCAC | GACA |
| Osbi | CCTAA-  | AC | --- | GTAAG | GTAGCTTTA  | ACAT-----A--   | TCTGAAC       | -----TCAC | GAAA |
| Pabu | CTATAG  | AC | --- | GAAA  | GTAACTTTA  | AAATGA---A--   | TACGAAAC      | -----TCAC | GAAA |
| Hial | CTATT-  | AC | --- | GAAA  | GTAGCTTTA  | ACAAAAAG-C--   | ACTAGAAC      | -----TCAC | GACA |
| Elha | CCTAC-  | AC | --- | GAAA  | GTAGCTTTA  | ACCACAA--GACCC | CTAGAAC       | -----TCAC | GACA |
| Mlcy | CAACC-  | AC | --- | GAAA  | GTAGCTTTA  | ATCACA---AACCC | CTAGAAC       | -----CCAC | GACA |
| Algl | CTTTA-  | AC | --- | GAAG  | GTAGCTTTA  | AAAGATTA--CATC | CTCGAGT       | -----TCAC | GATA |
| Ptgi | CCAAA-  | AC | --- | GAAG  | GTAGCTTTA  | ATAT---ATTAAC  | CTCGAAT       | -----TCAC | GACA |
| Alaf | CCGAA-  | AC | --- | GAAA  | GTAGCTTTA  | AAATAACA--CCC  | CTTGAAC       | -----TCAC | GACA |
| Nock | CCAAA-  | AC | --- | GAAA  | GTAGCTTTA  | ATTTA----ACCC  | CTCGAAT       | -----TCAC | GACA |
| Anja | CCACT-  | AC | --- | GAAA  | GTGGCTTTA  | ACAC-----C     | TTTGAAC       | -----TCAC | GACA |
| Gyki | CAACG-  | AC | --- | GAAG  | GTGGTTCTA  | ATAACCTAA---T  | CTTGAAC       | -----TCAC | GACA |
| Syka | CCCCA-  | AC | --- | GAAA  | GTAGCTTTA  | ATAAAC---AAAT  | CTTGAAT       | -----TCAC | GACA |
| Opma | CCATA-  | AC | --- | GAAA  | GTAGCTTTA  | ACCCAAA----AT  | CTTGAAC       | -----TCAC | GAAA |
| Comy | CAATA-  | AC | --- | GAAA  | GTAACTTTA  | AAACAT-----T   | ACTTGAAT      | -----TCAC | GACC |
| Sasp | CTTTG-  | AC | --- | GAAA  | GTAGCTTTA  | -----ACAG      | TTTGAAT       | -----TCAC | GATA |
| Eupe | CTATA-  | AC | --- | GAAA  | GTAGCTTTA  | ACAC-----C--   | TTTGAAT       | -----TCAC | GATA |
| Enja | CTTAC-  | AC | --- | GAAA  | GTGACTTTA  | TTTTTCG---CT   | CCAGAAG       | -----CCAC | GAAA |
| Same | CAAAC-  | AC | --- | GAAA  | GTAGCTTTA  | CCCC---TTCCT-  | GCCAGAAC      | -----CCAC | GAGA |
| Chch | CAATA-  | AC | --- | GAAA  | GTAGCTTTA  | ATTACCGCC---AA | CCGTGACC      | -----CCAC | GACA |
| Grgr | CACCC-  | AC | --- | GAAA  | GTAGCTTTA  | CCACAA---ACCA  | CCCGACC       | -----TCAC | GACA |
| Caau | CTAAT-  | AC | --- | GAAA  | GTAACTTTA  | ATAAA----CCCA  | CCGTGACC      | -----CCAC | GAAA |
| Cyca | CTAAT-  | AC | --- | GAAA  | GTAACTTTA  | ATAAAC----CT   | CCGTGACC      | -----CCAC | GAAA |
| Dare | CAAAC-  | AC | --- | GAAA  | GTAGCTTTA  | AAATT-A---ATTA | CCGTGAAC      | -----CCAC | GAAA |
| Cost | CACAC-  | AC | --- | GAAG  | GTAGCTTTA  | ATTATTA--GTCC  | CCGTGACC      | -----CCAC | GAAA |
| Leec | CAAAA-  | AC | --- | GAAA  | GTAGCTTTA  | ATATAGC---CC   | CCGTGACC      | -----CCAC | GAAA |
| CrIa | CAAAT-  | AC | --- | GAAA  | GTAGCTTTA  | ATAAA---ACCA   | CCGTGACC      | -----CCAC | GAAA |
| Clmc | CAAAC-  | AC | --- | GAAG  | GTAGCTTTA  | ATTACATTC----T | CCTAACC       | -----CCAC | GAAA |
| Phin | CCAAC-  | AC | --- | GAAA  | GTAGCTTTA  | AAA-----TAA    | ACTGACG       | -----CCAC | GAAA |
| Icpu | CTAAC-  | AC | --- | GAAA  | GTAGCTTTA  | AAAACAC-----   | ACGTGACC      | -----CCAC | GAAA |
| Psto | CAAGC-  | AC | --- | GAAA  | GTAGCTTTA  | AACATTATT---A  | CCGTGACC      | -----CCAC | GAAA |
| Cora | CACAT-  | AC | --- | GAAA  | GTAACTTTA  | TTA--T---AACA  | TCCGAAC       | -----CCAC | GAAA |
| Eisp | CAATTAC | AC | --- | GAAA  | GCAACTTTA  | TGCTAAA---CGA  | CCGTGACC      | -----CCAC | GAAA |
| Apal | CAATC-  | AC | --- | GAAA  | GTAGCTTTA  | CATAAACC---A   | CCGTGACC      | -----CCAC | GAAA |
| EsLu | CTGCC-  | GC | --- | GAAA  | GCACTTTA   | AGTAT-----     | CCGTGAAC      | -----CCAC | GACA |
| Dape | CCCTC-  | GC | --- | GAAA  | GCACTTTA   | ATTCA-----     | TCTGAGC       | -----CCAC | GACA |
| Glse | CCACCCT | AC | --- | GAAA  | GTGGCTTTA  | AC-CCC----CCCC | CCCGAAC       | -----CCAC | GATA |
| Naar | CCCTC-  | AC | --- | GAAA  | GTGGCTTTA  | CCCCCCCC---C   | CCCGAAC       | -----CCAC | GACA |
| Baoc | CCCCC-  | AC | --- | GAAA  | GTGGCTTTA  | CCCC-----T     | CCCGAAC       | -----CCAC | GACA |
| Opso | CCCTT-  | AC | --- | GAAA  | GTAGCTTTA  | CCCCT----CCCT  | CCCGAAC       | -----CCAC | GATA |
| Alte | CAATC-  | AC | --- | GAAA  | GTAGCTTTA  | CTCAAGCCC---A  | CCCGACC       | -----CCAC | GACA |
| Plap | CTGTC-  | AC | --- | GAAA  | GTAGCTTTA  | TTCAAGC---CCG  | CCCGACC       | -----CCAC | GACA |

Plal CCACT--AC---GAAA**GTGGCTTTA**AC-----ACA**CC**TGAAC-----**CCAC**GACA  
 Sami CCACT--AC---GAAA**GTGGCTTTA**A-----CTCA**CC**TGAAC-----**CCAC**GACA  
 Rere CTACC--AC---GAAA**GTGACTTTA**CACCTAC-----T**TC**TGAAC-----**CCAC**GACA  
 Gama CCCTT--AC---GAAA**GTAGCTTTA**TTACTA---G---A**CC**TGAAC-----**CCAC**GACA  
 Onmy CTACT--**GC**---GAAA**GCAGCGTTT**AACTAT-----G**CC**TGACC-----**CCAC**GACA  
 Sasa CTACT--AC---GAAA**GCAGCTTTA**ATTAT-----A**CC**TGAAC-----**CCAC**GACA  
 Cola CCACT--**GC**---GAAA**GCAGCTTTA**ATC-----ACCA**CC**TGAAC-----**CCAC**GACA  
 Dita CCACCC-AC---GAAA**GTGGCTCTA**CCCTC-----A**CC**TGACC-----**CCAC**GACA  
 Gogr CTATC--AC---GAAA**GTAGCTTCA**TCCCC-----A**CC**TGAAC-----**CCAT**GACA  
 Chsl CCCTT--AC---GAAA**GTAGCTTTA**C-----GCCA**CC**CGAAC-----**CCAC**GATA  
 Atja CACAT--AC---GAAG**GTAGCTTTA**TTAA-TA-----T**TC**TGAAC-----**CCAC**GGCA  
 lido CCTAT--AC---GAAG**GTAGCTTTA**T--TAAT-----A**TC**TGAAC-----**CCAC**GACA  
 Auja CCGCT--AC---GAAA**GTGACTTTA**AACC-----C**CC**TGAAC-----**CCAC**GACA  
 Chag CCGCT--AC---GAAA**GTGGCTTTA**ATAA---CCC---T**CC**CGACC-----**CCAC**CACA  
 Hami CAACA--AC---GAAA**GTGACTTTA**-----AATA**TC**CGACC-----**CCAC**GACA  
 Saun CAGCA--**GC**---GAAA**GTGACTTTA**A----AC-----C**TC**CGACC-----**CCAC**GACA  
 Nema CCCCC-AC---GAAA**GTGGCTTTA**ACCCCA---C---C**CC**CGAAC-----**CCAC**GACA  
 Disp CCACC--AC---GAAA**GTGACTTTA**--ATCT-CG---C**CC**CGAAC-----**CCAC**GAAA  
 Myaf CGACC--AC---GAAA**GTGGCTTTA**ACCTA-----A**CT**CGAAC-----**CCAC**GAAA  
 Lagu TCTCC--AC---GAAG**GTGGCTTTA**AAC-----CA**GC**TGAAC-----**CCAC**GAAA  
 Trtr CTCCC--AC---GAAA**GTGGCTTTA**--ATTA-----T**ACT**TGAAC-----**CCAC**GAGA  
 Zucr CTCCT--AC---GAAA**GTGGCTTTA**-ATAT-----A**AC**TGAAC-----**CCAC**GAAA  
 Pxja CCGCC--AC---GAAA**GTGACTCTA**ACCAT-----ACC**CC**TGAAT-----**CCAC**GAAA  
 Pxlo CCACC--AC---GAAA**GTGACTCTA**ACCACA-----CC**CC**TGAAT-----**CCAC**GAAA  
 Pctr CCAAC--AC---GAAA**GTAGCCCTA**CCC-----CTC**CC**CGAAC-----**CCAC**GAAA  
 Apsa CTATC--AC---GAAA**GTAGCTCTA**CATA-----C**CC**CGAAC-----**CCAC**GAAA  
 Cabe CCTTT--AC---GAAA**GTAGCTTTA**-----ATCA**TC**TGAAC-----**CCAC**GAAA  
 Bzze CCACC--AC---GAAA**GTGACTTTA**CACA-----C**CC**TGAAC-----**CCAC**GAAA  
 Siim CAACT--AC---GAAA**GTGACTTTA**AATA-----C**ACT**GAGC-----**CCAC**GAAA  
 Ctru CCACC--AC---TAAA**GTGACTTTA**AAT-----ACCAT**CC**TGAAC-----**CCAC**GAAA  
 Dpbr CCACC--AC---CAAG**GTGGCTTTA**AAC-----CCC**CC**TGAAC-----**CCAC**GAAA  
 Caki CACTC--AC---GAAA**GTACCCTA**GTACC-----C**CC**TGACC-----**CCAC**GAAA  
 Phja CAGTCA-AC---GAAA**GTATTCTA**CC---A-----AC**CC**TGACA-----**CCAC**GAAA  
 Brsp TCAT---AC---GAAA**GTATCCTA**ATATT-----CTT**AAT**-----**CCAC**GAGA  
 Gamo CAATC--AC---GAAA**GTGCCCTA**AA--AC-----C**TC**CGATT-----**CCAC**GAAA  
 Lolo CAATC--AC---GAAA**GTGCCCTA**CAAA-----T**CTC**TGATT-----**CCAC**GAAA  
 Batr CCATT--**AT**---ACAA**GC**ACTCCA**TTC**-----A**CT**TGACC-----**CCAC**GAAA  
 Prmy CTCTCC-AC---AAT**GAA**ACTTTA**TTC**-----CC--**CT**TGACC-----**CCAC**GTAA  
 Loli CACTC--AC---GTAA**GTACTTTA**ATT-----AA-**ACT**TGAAC-----**CCAC**GAAA  
 Loam CAAAT--AC---GAAA**GTACTTTA**--TA-----AC--**TC**TGAAT-----**CCAC**GAAA  
 Chab CAACT--AC---GAAA**GTGGCTTTA**CA-----AGA**TC**TGACC-----**CCAC**GAAA  
 Chto CAACT--AC---GAAA**GTGGCTTTA**CA-----AAA**TC**TGACC-----**CCAC**GAAA  
 Majo CCACC--AC---GAAA**GTGGCTTTA**T--ATAAC-----C**CC**CGAAC-----**CCAC**GAGA  
 Hlst CGACT--AC---GAAA**GTGACTTTA**CAAT-----A**CC**TGATC-----**CCAC**GAAA  
 Clpe CAACT--AC---GAAA**GTGGCTCTA**CGG-----AG**TC**TGACC-----**CCAC**GAAG  
 Mlmr CGACT--AC---GAAA**GTGACTTTA**AAAAT-----T**CC**CGACC-----**CCAC**GAAA  
 Crcr CAACT--AC---GAAA**GTACTTTA**AC---T-----ATA**TC**CGACT-----**CCAC**GAAA  
 Muce CAACC--AC---GAAA**GTACTTTA**ATTA-----TA**TC**CGACT-----**CCAC**GAAA  
 Bege CCTCA--AC---GAAA**GTGACTTTA**AC-----CTT**TC**TGACC-----**CCAC**GAAA  
 Mela CCCCC-AC---GAAA**GTGGCTTTA**ACC--C---A--T**TC**TGACT-----**CCAC**GAAA  
 Hats CCCCT--AC---GAAA**GTGGCTTTA**A-----CCCT**TC**CGAAC-----**CCAC**GAAA  
 Orla CAAGA--AC---GAAA**GTACTTTA**-----ACTT**TA**TGAAT-----**CCAC**GAAA

|      |                 |           |            |              |            |            |            |            |      |      |
|------|-----------------|-----------|------------|--------------|------------|------------|------------|------------|------|------|
| Cosa | CC-T--AC--GAAA  | GTAGCTTTA | ATCCA----- | CCCGACT----- | CCAC       | GAAA       |            |            |      |      |
| Exsp | CCCCT--AC--GAAA | GTGGCTTTA | ACT-----   | CTCC         | TGACC----- | CCAC       | GAAA       |            |      |      |
| Depa | CTATT--AC--GAAA | GTA       | ACTTTA     | ATACA-----   | TCT        | GACT-----  | CCAC       | GAAA       |      |      |
| Rima | CCCC--AC--GAAA  | GTG       | ACTTTA     | ATAC-----    | CCT        | TGAAC----- | CCAC       | GAAA       |      |      |
| Fuol | CAAAC--GC--GAAA | GTA       | ACTTTA     | AATA-----    | TCC        | TGACC----- | CCAC       | GAAA       |      |      |
| Gmaf | CAACT--AC--GAAA | GTGG      | CCCTTA     | ATT-----     | TCCC       | CT         | TGACC----- | CCAC       | GAAA |      |
| Xeei | CAATA--AC--GAAA | GTAG      | CTTTA      | A-ATA-----   | T---       | TT         | TGACT----- | CCAC       | GAAA |      |
| Pros | CCATC--AC--GAAA | ATG       | CTTTA      | CCCCCT---    | CCCC       | CC         | TGACC----- | CCAC       | GAAA |      |
| Scmi | CCCCT--AC--GAAA | GTA       | ACTTTA     | AAC---C---   | CCG        | CC         | TGACC----- | CCAC       | GAAA |      |
| Rolo | CCACC--AC--GAAA | GTGG      | CTTTA      | CCCCACC----- | CC         | CGAAC----- | CCAC       | GAAA       |      |      |
| Cere | CCACC--AC--GAAA | GTGG      | CTTTA      | CCCC-----    | CCCC       | CC         | TGACC----- | CCAC       | AAAA |      |
| Daga | CCACC--AC--GAAA | GTGG      | CTTTA      | ATA-----     | AG         | CC         | CGAAT----- | CCAC       | GAAA |      |
| Anco | CCACC--AC--GAAA | GTGG      | CTTTA      | CTCT-----    | TCC        | TGAAC----- | CCAC       | GAAA       |      |      |
| Dmve | CCACC--AC--GAAA | GTGG      | CTTTA      | ATC-C-----   | CC         | TGACT----- | CCAC       | GAAA       |      |      |
| Dmar | CCACC--AC--GAAA | GTGG      | CTTTA      | ATT-----     | CT         | CC         | TGACC----- | CCAC       | GAAA |      |
| Anka | CCACC--AC--GAAA | GTGG      | CTTTA      | CCCA-----    | TCC        | TGAAC----- | CCAC       | GAAA       |      |      |
| Moja | CCACC--AC--GAAA | GTGG      | CTTTA      | A-----       | CTTTT      | CC         | TGAAC----- | CCAC       | GAAA |      |
| Hoja | CCACT--AC--GAAA | GTGG      | CTTTA      | ACCTT-----   | TCC        | TGAAC----- | CCAC       | GAAA       |      |      |
| Bede | CCATC--AC--GAAA | GTGG      | CTTTA      | CCCCC---     | A---       | CC         | CGAAC----- | CCAC       | GAAA |      |
| Besp | CCATC--AC--GAAA | GTGG      | CTTTA      | CCCCCA-----  | CC         | CGAAC----- | CCAC       | GAAA       |      |      |
| Mysp | CCACT--AC--GAAA | GTGG      | CTTTA      | CTAG-----    | CC         | TGAAC----- | CCAC       | GAAA       |      |      |
| Osja | CTACC--AC--GAAA | GTGG      | CTTTA      | TTAA-----    | CC         | TGAAC----- | CCAC       | GAAA       |      |      |
| Sgro | CCACC--AC--GAAA | GTGG      | CTTTA      | C---CAG----- | CC         | TGAAC----- | CCAC       | GAAA       |      |      |
| Pzpa | CACCC--AC--TAAA | GTG       | ATTCCA     | CCAATC-----  | CC         | CGACC----- | CCAC       | GAAA       |      |      |
| Zeja | CCCCT--AC--AAAA | GTGG      | CCCCA      | ACCTAC-----  | TCT        | GACC-----  | CCAC       | GAAA       |      |      |
| Znne | CTCCT--AC--AAAA | GTG       | ACCCTA     | AAC-----     | CCT-       | AC         | TGAAC----- | CCAC       | GAAA |      |
| Zefa | CCCC--AC--AAAA  | GTGG      | CCCTA      | AACCC-----   | CC         | AC         | TGACC----- | CCAC       | GAAA |      |
| Acni | CCCC--AC--AAAA  | GTGG      | CCCCA      | A-----       | CTAA       | CC         | CGACC----- | CCAC       | GAAA |      |
| Ncrh | CCCC--AC--AAAA  | GTGG      | CCCCA      | -ACTT---     | A---       | CC         | CGACC----- | CCAC       | GAAA |      |
| Agca | CAACT--AC--GAAA | GTGG      | CTTTA      | CATAT-----   | TCT        | GACC-----  | CCAC       | GAAA       |      |      |
| Hydy | CAACT--AC--GAAG | GTGG      | CTTTA      | CCC-----     | AA         | CC         | TGAAC----- | CCAC       | GAAA |      |
| Gsac | CAACC--AC--GAAG | GTGG      | CTTTA      | -----        | TTTA-      | AC         | TGAAC----- | CCAC       | GAAA |      |
| Pevo | CATCC--AC--GAAA | GTG       | ACTTTA     | CA-----      | TTA        | CC         | TGAAC----- | CCAC       | GAAA |      |
| Hiku | CATTT--AC--GAAA | GTG       | ACTTTA     | ---CAA-----  | AAC        | TGAAC----- | CCAC       | GAAA       |      |      |
| Inpa | CAGCT--AC--GAAA | GTGG      | CTTTA      | AAC-----     | ACT        | TGACC----- | CCAC       | GAAA       |      |      |
| Auch | CAGAA--AC--GAAA | GTAG      | TTTTA      | TACA-----    | TCT        | TGATT----- | CCAC       | GAG        |      |      |
| Fico | CCACC--AC--GAAA | GTGG      | CTTTA      | TGTGA-----   | TCT        | TGAAC----- | CCAC       | GAAA       |      |      |
| Macs | CCACC--AC--GAAA | GTGG      | CTTTA      | ATT-----     | TAA        | CC         | TGAAC----- | CCAC       | GAAA |      |
| Moal | CTATC--AC--GAAA | GTAG      | CTTTA      | TATAA-----   | TCT        | GACC-----  | CCAC       | GAAA       |      |      |
| Syma | CACTC--AC--GAAA | GTA       | ACCTTAC    | -----        | AAA        | TCT        | GACT-----  | CCAC       | GAAA |      |
| Mafr | CAATC--AC--GAAG | GTA       | ACTTTA     | CATAAT-----  | TCT        | GACC-----  | CCAC       | GAAA       |      |      |
| Dcpe | CCACC--AC--GAAA | GTG       | ACTTTA     | -CACA-----   | ACC        | TGAAC----- | CCAC       | GAAA       |      |      |
| Dcti | CCACC--AC--GAAA | GTG       | ACTTTA     | TGTA-----    | GCC        | TGAAC----- | CCAC       | GAAA       |      |      |
| Hehi | CAACC--AC--GAAG | GTAG      | CTTTA      | CA-----      | A-         | CC         | CC         | TGACC----- | CCAC | GAAA |
| Stam | CAATC--AC--GAAA | GTAG      | CTTTA      | T-----       | TTCT       | CC         | TGAAT----- | CCAC       | GAGA |      |
| Hogi | CAATA--AC--GAAA | GTAG      | CCCTTA     | GTA-----     | TA         | AC         | TGAAC----- | CCAC       | GAAA |      |
| Erzo | CAACC--AC--GAAG | GTG       | ACTTTA     | TTTAT-----   | AC         | TGAAC----- | CCAC       | GAAA       |      |      |
| Hxot | CAACC--AC--GAAA | GTGG      | CTTTA      | TTT-----     | GA-        | TCT        | TGAAC----- | CCAC       | GAAA |      |
| Core | CTCCC--AC--GAAA | GTG       | CTTTA      | TCTAG-----   | TCT        | TGAAC----- | CCAC       | GAAA       |      |      |
| Apve | CAACC--AC--GAAA | GTA       | ACTTTA     | T--TTA-----  | A          | CC         | TGACC----- | CCAC       | GAAA |      |
| Latj | CAACC--AC--GAAA | GTG       | ACTTTA     | -TAAC-----   | CC         | TGACT----- | CCAC       | GAAA       |      |      |
| Laja | CAATC--AC--GAAA | GTGG      | CTTTA      | ACT-----     | CCT        | TC         | CGAAT----- | CCAC       | GAAA |      |



|      |                  |           |                |       |             |            |      |      |
|------|------------------|-----------|----------------|-------|-------------|------------|------|------|
| Syja | CAATC--AC---GAAA | GTAGCTTTA | AAATC-----     | AC    | ATGACC----- | CCAC       | GAAA |      |
| Epme | CATCC--AC---GAAG | GTGGCTTTA | T-TAC-----     | ACC   | TGAAC-----  | CCAC       | GAAA |      |
| Grse | CAACT--AC---GAAA | GTGGCTTTA | ACT-----       | A--   | CCT         | GAAAT----- | CCAC | GAAA |
| Clja | CAATT--AC---GAAA | GTGGCTTTA | T-TAC-----     | A--   | TTT         | TGACC----- | CCAC | GAAA |
| Ogcy | CCACC--AC---GAAA | GTGACTTTA | AC-CCA-----    | A     | TCT         | TGAAT----- | CCAC | GAAA |
| Plna | CAACT--AC---GAAA | GTGGCTTTA | AATAGT-----    |       | TCT         | GACC-----  | CCAC | GAAA |
| Lema | CAATC--AC---GAAA | GTGGCTTTA | -CTTT-----     |       | ACC         | TGACC----- | CCAC | GAAA |
| Etzo | CAACC--AC---GAAA | GTGGCTTTA | -----          | CAAC  | GC          | TGAAC----- | CCAC | GAAA |
| Apse | CTGCC--AC---GAAA | GTGACTTTA | -CACTC-----    |       | TTT         | TGAAC----- | CCAC | GAAA |
| Epde | CAATC--AC---GAAA | GTGGCTTTA | CCCTC-----     |       | CCT         | TGAAT----- | CCAC | GAAA |
| Slja | CAACC--AC---GAAA | GTAGCTTTA | ACA-----       | AA-   | CCT         | GACT-----  | CCAC | GAAA |
| Bsja | CAATC--AC---GAAA | GTGGCTTTA | TATA-----      | A     | TTT         | TGAAC----- | CCAC | GTAA |
| Ecna | CAACT--AC---GAAA | GTGGCTTTA | T---AAAA-----  |       | CCT         | TGAAT----- | CCAC | GAAA |
| Cohi | CAACT--AC---GAAA | GTGGCTTTA | AAAC---A-----  |       | CCT         | TGAAC----- | CCAC | GAAA |
| Caar | CGACT--AC---GAAA | GTGGCTTTA | AC-AT-CA-----  |       | CCT         | TGAAC----- | CCAC | GAAA |
| Came | CAACT--AC---GAAA | GTGGCTTTA | T-----         | CCAA  | CCT         | TGAAC----- | CCAC | GAAA |
| Mema | CAACC--AC---GAAA | GTGGCTTTA | TC-----        | ACC   | CCT         | TGAAC----- | CCAC | GAAA |
| Lenu | CAACA--AC---GAAA | GTGACCTTA | GCCCA-----     | ACC   | TGAAC-----  | CCAC       | GAAA |      |
| Plma | CCACC--AC---GAAA | GTGGCTTTA | T-AAT-----     | CCT   | TGATC-----  | CCAC       | GAAA |      |
| Emst | CAATC--AC---GAAA | GTGACTTTA | TGCC-----      | A     | TCT         | TGAAC----- | CCAC | GAAA |
| Ptti | CAACT--AC---GAAA | GTGGCTTTA | CAACA-----     |       | TCT         | TGAAT----- | CCAC | GAAA |
| Losu | CAATT--AC---GAAA | GTAGCTTTA | TA-----        | ATA-  | ACT         | GACT-----  | CCAC | GAAA |
| Geoy | CAACT--AC---GAAA | GTGACTTTA | C-AAA-----     |       | CCT         | GACT-----  | CCAC | GAAA |
| Dipi | CAACT--AC---GAAA | GTGGCTTTA | -TAAT---A--    |       | TCT         | TGAAC----- | CCAC | GAAA |
| Pama | CAATC--AC---GAAA | GTAGCTTTA | TATTT-----     |       | TCT         | TGACC----- | CCAC | GAAA |
| Leob | CAGCT--AC---GAAA | GTGACTTTA | TC-----        | TTA   | TCT         | TGACC----- | CCAC | AAAA |
| Neba | CACTT--AC---GAAG | GTAGCTTTA | CAAT-----      | A--   | TTT         | TGAAC----- | CCAC | GAAA |
| Pdpl | CAACA--AC---GAAA | GTGGCTTTA | TTCA-----      | CCT   | TGAAC-----  | CCAC       | GAAA |      |
| Nimi | CGCCC--AC---GAAA | GTGGCTTTA | -CAA-----      | TCT   | TGAAC-----  | CCAC       | GAAA |      |
| Uptr | CCACC--AC---GAAA | GTGGCTTTA | TATAAC-----    |       | CC          | CGAAC----- | CCAC | GAGA |
| Pesc | CACCC--AC---GAAA | GTGGCTTTA | -----          | CATAC | TCT         | TGAAT----- | CCAC | GAAA |
| Baar | CAATC--AC---GAAA | GTGGCTTTA | TATT-----      |       | CCT         | TGACC----- | CCAC | GAAA |
| Moar | CAACT--AC---GAAA | GTGGCTTTA | -----          | CTCCA | TCT         | TGAAT----- | CCAC | GAAA |
| Toja | CGACC--AC---GAAA | GTGGCTTTA | -----          | CTCCC | CCT         | TGAAC----- | CCAC | GAAA |
| Chau | CAACT--AC---GAAA | GTGGCTCTA | T-CATA-----    |       | TCT         | TGATT----- | CCAC | GAAA |
| Chse | CACTC--AC---GAAA | GTAGCTTTA | TTTCA-----     |       | TCT         | TGACC----- | CCAC | GAAA |
| Enar | CAATT--AC---GAAA | GTAGCTTTA | TTTCA-----     |       | GC          | CGAAC----- | CCAC | GAAA |
| Hpty | CAATC--AC---GAAA | GTGGCTTTA | AACA---CCCCCCC |       | CCT         | TGAAC----- | CCAC | GAAA |
| Nana | CAACT--AC---GAAA | GTGACCTTA | CCACA-----     | AA    | TGAAC-----  | CCAC       | GAAA |      |
| Mcst | CAATC--AC---GAAA | GTGGCTTTA | A----C---ACT   |       | TCT         | CGAAC----- | CCAC | GAAA |
| Rhox | CAATT--AC---GAAA | GTAGCTTTA | -----          | CACAA | CCT         | TGAAC----- | CCAC | GAAA |
| Opfa | CAATC--AC---GAAA | GTGGCTTTA | T-----         | ACCA  | ACT         | TGAAC----- | CCAC | GAAA |
| Paar | CAACA--AC---GAAA | GTGGCTTTA | CCCCC-----     | CCC   | CC          | CGATT----- | CCAC | GAAA |
| Gozo | CAACC--AC---GAAA | GTGGCTTTA | TACT-----      | CCT   | TGAAC-----  | CCAC       | GAAA |      |
| Ackr | CTATC--AC---GAAA | GTAGCTTTA | CAA-----       | GAT   | TGAAC-----  | CCAC       | GAAA |      |
| Elev | CAACC--AC---GAAA | GTGGCTTTA | T-----         | ATT   | CCT         | TGAAC----- | CCAC | GAAA |
| Trdu | CCACT--AC---GAAA | GTGGCTTTA | TATC-----      |       | CC          | CGACC----- | CCAC | GAAA |
| Amoc | CCATT--AC---GAAA | GTAGCTTTA | CCCAT-----     |       | CCT         | TGACC----- | CCAC | GAAA |
| Hame | CAACT--AC---GAAA | GTGACTTTA | AAA--AT-----   |       | CCT         | TGACC----- | CCAC | GAAA |
| Chso | CAACC--AC---GAAA | GTGGCTCTA | ATT--ACT-----  |       | CCT         | TGACA----- | CCAC | GAAA |
| Lyto | CAGCC--AC---GAAG | GTAGCTTTA | -TT-----       | TG    | TCT         | TGAAC----- | CCAC | GAAA |
| Encr | CAACC--AC---GAAG | GTGGCTTTA | T---TTAG-----  |       | TCT         | TGAAC----- | CCAC | GAAA |

|      |                                                                                        |
|------|----------------------------------------------------------------------------------------|
| Bvar | CAAAC--AC---GAAA <b>GTAGCTTTA</b> AAATA----- <b>CC</b> CGAAC----- <b>CCAC</b> GAAA     |
| Noco | CAATC--AC---GAAA <b>GTAGCTTTA</b> CTAAA----- <b>CC</b> TGAAC----- <b>CCAC</b> GAAA     |
| Chsp | CAACA--AC---GAAA <b>GTAGCTTTA</b> ATT-----ATA <b>AT</b> TGAAG----- <b>CCAC</b> GAAA    |
| Arja | CAACC--AC---GAAA <b>GTGGCTTTA</b> TTTA-----A- <b>TC</b> TGAAC----- <b>CCAC</b> GAAA    |
| Pase | CATCT--AC---GAAA <b>GTGGCTTTA</b> ATA----- <b>CTC</b> CCCAT----- <b>CCAC</b> GAAA      |
| Trel | CCCCT--AC---GAAA <b>GTAGCTCTA</b> AGAAC-----A- <b>TT</b> TTAAC----- <b>CCAC</b> GAGA   |
| Lifa | CAATA--AC---GAAA <b>GTAGCTTTA</b> TCTA----- <b>GT</b> CTGATG----- <b>CCAC</b> GAAA     |
| Acur | CATCA--AC---GAAA <b>GTGGCTTTA</b> TAC----- <b>CT</b> CTGATT----- <b>CCAC</b> GAAA      |
| Ampe | CAACT--AC---GAAA <b>GTGGCTTTA</b> C-AAC----- <b>CC</b> TGAAC----- <b>CCAC</b> GAAA     |
| Urja | CGATC--AC---GAAA <b>GTAGCTTTA</b> A-----CACC <b>CC</b> TGAGC----- <b>CCAC</b> GAAA     |
| Enet | CCTCC--AC---GAAA <b>GTGGCTTTA</b> A---TAA----- <b>TT</b> ITGACC----- <b>CCAC</b> GAAA  |
| Ptbr | CTACT--AC---GAAA <b>GTAGCTTTA</b> AAACA----- <b>AT</b> TGAAC----- <b>CCAC</b> GAAA     |
| Safa | CCGTC--AC---GAAA <b>GTAACTTTA</b> TA-----AT <b>AT</b> TGAAC----- <b>CCAC</b> GAAA      |
| Icae | CCACC--AC---GAAA <b>GTGGCTTTA</b> -----CAACT <b>CC</b> TGACT----- <b>CCAC</b> GAAA     |
| Asmi | CACCC--AC---GAAA <b>GTAGCTTTA</b> TAAA----- <b>AT</b> AAATA----- <b>CCAC</b> TAAA      |
| Foal | CATAA--AC---GAAA <b>GTAGCCCTA</b> TACT-----A <b>TT</b> TGAAC----- <b>CCAC</b> GAAA     |
| Drze | CTAAC--AC---GAAA <b>GTAGCTTTA</b> A--AA----- <b>TA</b> CTGAT----- <b>CCAC</b> GAAA     |
| Rhas | CCCCT--AC---GAAA <b>GTGGCTTTA</b> AAC----- <b>CT</b> CTGAAC----- <b>CCAC</b> GAAA      |
| Elac | CTTCC--AC---GAAA <b>GTGGCTTTA</b> -----AAAA- <b>CT</b> CTGAAC----- <b>CCAC</b> GAAA    |
| Kugu | CATTA--AC---GAAG <b>GTAGCTTTA</b> -----TTCA <b>AT</b> TCGAC----- <b>CCAC</b> GAAA      |
| Plor | CAACC--AC---GAAA <b>GTAGCTTTA</b> CA-CC----- <b>CC</b> TGAAC----- <b>CCAC</b> GAAA     |
| Sgun | CAATC--AC---GAAA <b>GTGGCTTTA</b> C-----TTAT <b>TC</b> TGAAC----- <b>CCAC</b> GAAA     |
| Zaco | CGATC--AC---GAAA <b>GTGGCTTTA</b> CA-----TT-A <b>CT</b> TGAAC----- <b>CCAC</b> GAAA    |
| Zbfl | CAACC--AC---GAAA <b>GTGGCTTTA</b> TACTT----- <b>ACT</b> TGAAC----- <b>CCAC</b> GAAA    |
| Spba | CAATC--AC---GAAA <b>GTGGCTTTA</b> --ATCCACA----- <b>CC</b> TGACT----- <b>CCAC</b> GAAA |
| Game | CCACC--AC---GAAA <b>GTGGCTTTA</b> TAATT----- <b>CC</b> TGACC----- <b>CCAC</b> GAAA     |
| Thth | CCACC--AC---GAAA <b>GTGGCTTTA</b> TGAA----- <b>CC</b> TGACC----- <b>CCAC</b> GAAA      |
| Xigl | CAACT--AC---GAAA <b>GTGGCTTTA</b> --CAT-----CA <b>CC</b> TGAAC----- <b>CCAC</b> GAAA   |
| Hyja | CCACC--AC---GAAA <b>GTGGCTTTA</b> TG-----ACT <b>CC</b> TGATT----- <b>CCAC</b> GAAA     |
| Psan | CAACC--AC---GAAA <b>GTGGCTTTA</b> -----TGACT <b>CC</b> TGAAT----- <b>CCAC</b> GAAA     |
| Cupa | CCACC--AC---GAAA <b>GTGGCTTTA</b> T-----GACC <b>CC</b> TGACT----- <b>CCAC</b> GAAA     |
| Mpch | CAACT--AC---GAAA <b>GTAGCTTTA</b> -TA--T---G--- <b>TT</b> TGAAC----- <b>CCAC</b> GAAA  |
| Char | CAACT--AC---GAAA <b>GTGGCTTTA</b> CAA-----CA <b>CC</b> CGAAC----- <b>CCAC</b> GAAA     |
| Pser | CAACT--AC---GAAA <b>GTGGCTTTA</b> ACT--AC-----A <b>CC</b> TGAAC----- <b>CCAC</b> GAAA  |
| Prol | CAATT--AC---GAAA <b>GTAGCTTTA</b> TTCCAC----- <b>CC</b> TGAAC----- <b>CCAC</b> GAAA    |
| Plbi | CAACT--AC---GAAA <b>GTAGCTCTA</b> CCCTAT----- <b>CC</b> TGAAC----- <b>CCAC</b> GAAA    |
| Calu | CACCC--AC---GAAA <b>GTAGCTTTA</b> ATA-----CC <b>CC</b> TGACT----- <b>CCAC</b> GAAA     |
| Papa | CAGCT--AC---GAAA <b>GTGGCTTTA</b> -TAA-----AG <b>TC</b> CGAAC----- <b>CCAC</b> GAAA    |
| Sufr | CAACG--AC---GAAA <b>GTGGCCCTA</b> TCCA-----AT <b>TC</b> CCAAC----- <b>CCAC</b> GAAA    |
| Stci | CAACT--AC---GAAG <b>GTGGCTTTA</b> TA-----ACT <b>TC</b> TGAAC----- <b>CCAC</b> GAAA     |
| Taru | CAATA--AC---GAAA <b>GTAGCTCTA</b> CTA----- <b>ACT</b> CGAAC----- <b>CCAC</b> GAAA      |
| Rala | CAACA--AC---GAAA <b>GTGGCTTTA</b> -----AATTT <b>TC</b> CGAAC----- <b>CCAC</b> GAAA     |

\*

\*

|      | 25     | 26     | 26'  | 25'  | 27         |       |     |        |     |            |       |   |
|------|--------|--------|------|------|------------|-------|-----|--------|-----|------------|-------|---|
| Scca | GTTGGG | -CCC   | CAAC | TAGG | ATTA-GATAC | CCCTA | CTA | TGCCCT | -AC | CATAAACTTA | GACAA | T |
| Muma | GTTGAG | -ACCC  | CAAC | TAGG | ATTA-GATAC | CCCTA | CTA | TGCCCA | -AC | CATAAACTTA | GACAA | T |
| Erca | ACCAAG | -ATACA | CAAC | TGGG | ATTAAGATAC | CCCCA | CTA | TGCTTC | -GA | ATTAAACTAA | GACGG | T |
| Pose | ACCAAG | -ACACA | CAAC | TGGG | ATTA-GATAC | CCCCA | CTA | TGCTTC | -GA | ACTAACTAA  | GGGGC |   |
| Actr | ACTGAG | -ACACA | CAAC | TGGG | ATTA-GATAC | CCCCA | CTA | TGCTCA | -GT | CATAAACCTT | GGTAA | T |
| Scal | ACTGAG | -GCACA | CAAC | TGGG | ATTA-GATAC | CCCCA | CTA | TGCTCA | -GT | CATAAACTTT | TGGCC | A |
| Posp | ACCGAG | -ACACA | CAAC | TGGG | ATTA-GATAC | CCCCA | CTA | TGCTCA | -GT | CATAAACTTT | GGTGA | T |
| Atsp | GCTAAG | -ACACA | CAAC | TGGG | ATTA-GATAC | CCCCA | CTA | TGCTTA | -GC | CCTAAACCTA | AATAA | T |
| Leoc | GCTAAG | -ACACA | CAAC | TGGG | ATTA-GATAC | CCCCA | CTA | TGCTTA | -GC | CCTAAACCTA | AATAA | T |
| Amca | GCTAAG | -ACACA | CAAC | TGGG | ATTA-GATAC | CCCCA | CTA | TGCTTA | -GC | TATAAACCTT | GATAA | T |
| Osbi | GCTGGG | -AAACA | CAAC | TGGG | ATTA-GATAC | CCCCA | CTA | TGCCCA | -GT | CATAAACTTT | AATGG | T |
| Pabu | GCTGAG | -AAACA | CAAC | TGGG | ATTA-GATAC | CCCCA | CTA | TGCTCA | -GC | CGTAAACTTT | GATAG | T |
| Hial | GCTGGG | -AAACA | CAAC | TGGG | ATTA-GATAC | CCCCA | CTA | TGCCCA | -GC | CATAAACCTT | GATAA | T |
| Elha | GCCAAG | -ACACA | CAAC | TGGG | ATTA-GATAC | CCCCA | CTA | TGCTTC | -GC | CGTAAACTTT | GATGA | T |
| Mlcy | GCCAGG | -ACACA | CAAC | TGGG | ATTA-GATAC | CCCCA | CTA | TGCCCT | -GC | CTTAAACCTT | GATAG | C |
| Algl | GCTAAG | -GCACA | CAAC | TGGG | ATTA-GATAC | CCCCA | CTA | TGCTTA | -GC | CTTAAACCTT | GATAA | T |
| Ptgi | ACTGAG | -ACACA | CAAC | TGGG | ATTA-GATAC | CCCCA | CTA | TGCTCA | -GC | CTTAAACCTT | GATGA | T |
| Alaf | GCTAAG | -AAACA | CAAC | TGGG | ATTA-GATAC | CCCCA | CTA | TGCTTA | -GC | CTCAAACCTT | GGTAA | T |
| Nock | GCTAAG | -GAACA | CAAC | TGGG | ATTA-GATAC | CCCCA | CTA | TGCTTA | -GC | CTCAAACCTT | GGTAA | T |
| Anja | GTTGAG | -AAACA | CAAC | TGGG | ATTA-GATAC | CCCCA | CTA | TGCTCA | -AC | CTTAAACAAC | GATGA | C |
| Gyki | GCCAAG | -ATACA | CAAC | TGGG | ATTA-GATAC | CCCCA | CTA | TGCTTC | -GC | CTTAACTAA  | GGCGA | T |
| Syka | GTTAAG | -GAACA | CAAC | TGGG | ATTA-GATAC | CCCCA | CTA | TGCTTC | -AC | CGTAAACAAC | GATGA | C |
| Opma | GTTAAG | -AAACA | CAAC | TGGG | ATTA-GATAC | CCCCA | CTA | TGCTTA | -AC | CGTAAACAAC | GACGG | A |
| Comy | GTAAG  | -AAACA | CAAC | TGGG | ATTT-GATAC | CCCCA | CTA | TGCTTA | -AC | TGTAACAAC  | GATGA | T |
| Sasp | GTTAAG | -AAACA | CAAC | CGGG | ATTA-GATAC | CCCCA | CTA | TGCTTA | -AC | CGTAAACAAT | GATGG | T |
| Eupe | GTTAAG | -AAACA | CAAC | TGGG | ATTA-GATAC | CCCCA | CTA | TGCTTA | -AC | CTTAAACAAC | GATGA | A |
| Enja | GCTGGG | -ACACA | CAAC | TGGG | ATTA-GATAC | CCCCA | CTA | TGCCCT | -GC | CGTAAACTTT | AATGG | T |
| Same | GCTGGG | -ATACA | CAAC | TGGG | ATTA-GATAC | CCCCA | CTA | TGCCCT | -GC | CGTAAACTTA | GATAT | T |
| Chch | ACTGAG | -AAACA | CAAC | TGGG | ATTA-GATAC | CCCCA | CTA | TGCTCA | -GT | CGTAAACTTA | GGTAT | T |
| Grgr | GCCGAG | -GAACA | CAAC | TGGG | ATTA-GATAC | CCCCA | CTA | TGCTCA | -GC | CGTAAACTTA | GATGG | T |
| Caau | GCTGAG | -AAACA | CAAC | TGGG | ATTA-GATAC | CCCCA | CTA | TGCTCA | -GC | CGTAAACTTA | GACAT | C |
| Cyca | GCTGAG | -AAACA | CAAC | TGGG | ATTA-GATAC | CCCCA | CTA | TGCTCA | -GC | CGTAAACTTA | GACAT | C |
| Dare | GCTAAG | -AAACA | CAAC | TGGG | ATTA-GATAC | CCCCA | CTA | TGCTTA | -GC | CATAACAAC  | GACAT | T |
| Cost | GCTGAG | -GAACA | CAAC | TGGG | ATTA-GATAC | CCCCA | CTA | TGCTCA | -GC | CATAAACCTA | GACGT | T |
| Leec | ACTGAG | -AAACA | CAAC | TGGG | ATTA-GATAC | CCCCA | CTA | TGCTCA | -GC | CGTAAACCTA | GACGT | T |
| CrIa | GCTGAG | -AAACA | CAAC | TGGG | ATTA-GATAC | CCCCA | CTA | TGCTCA | -GC | TATAAACCTA | GACGT | T |
| Clmc | GCTAAG | -AAACA | CAAC | TGGG | ATTA-GATAC | CCCCA | CTA | TGCTTA | -GC | CCTAAACTTA | GATGG | T |
| Phin | GCTAAG | -AAACA | CAAC | TGGG | ATTA-GATAC | CCCCA | CTA | TGCTTA | -GC | CTTAAACTCT | GATAA | A |
| Icpu | GCTAAG | -AAACA | CAAC | TGGG | ATTA-GATAC | CCCCA | CTA | TGCTTA | -GC | CCTAAACCA  | GATGT | C |
| Psto | GCTAAG | -AAACA | CAAC | TGGG | ATTA-GATAC | CCCCA | CTA | TGCTTA | -GC | TATAAACCTA | GATGT | C |
| Cora | GCTAAG | -AAACA | CAAC | TGGG | ATTA-GATAC | CCCCA | CTA | TGCTTA | -GC | CTTAAACCA  | GATAT | T |
| Eisp | GCTAAG | -AAACA | CAAC | TGGG | ATTA-GATAC | CCCCA | CTA | TGCTTA | -GC | CCTAAACTTA | GATGT | C |
| Apal | GCTAAG | -AAACA | CAAC | TGGG | ATTA-GATAC | CCCCA | CTA | TGCTTA | -GC | CCTAAACCTA | GATGT | A |
| EsLu | GCTATG | -GTACA | CAAC | TGGG | ATTA-GATAC | CCCCA | CTA | TGCTTA | -GC | CATAAATTTT | GATAA | A |
| Dape | GCTGTG | -AAACA | CAAC | TGGG | ATTA-GATAC | CCCCA | CTA | TGCTCA | -GC | CATAAATTTT | GAGGA | G |
| Glse | GCTATG | -ACACA | CAAC | TGGG | ATTA-GATAC | CCCCA | CTA | TGCTTA | -GC | CGTAAACTTT | GATTT | T |
| Naar | GCTATG | -ATACA | CAAC | TGGG | ATTA-GATAC | CCCCA | CTA | TGCTTA | -GC | TATAAACCTT | GATAG | A |
| Baoc | GCTATG | -ATACA | CAAC | TGGG | ATTA-GATAC | CCCCA | CTA | TGCTTA | -GC | TATAAACCTT | GATAG | A |
| Opso | ACTATG | -CCACA | CAAC | TGGG | ATTA-GATAC | CCCCA | CTA | TGCTTA | -GC | CGTAAACTTT | GATAA | A |
| Alte | GCTGAG | -ATACA | CAAC | TGGG | ATTA-GATAC | CCCCA | CTA | TGCTCA | -GC | CGTAAACTTA | GATGT | C |
| Plap | GCTGAG | -ACACA | CAAC | TGGG | ATTA-GATAC | CCCCA | CTA | TGCTCA | -GC | CGTAAACTTA | GATGT | C |

Plal ACTAAG-ATACAAC TGGG ATTA-GATAC CCCA CTA TGC TTA -GC CGTAAACTTT GATAT T  
 Sami GCTAAG-GTACAAC CGGG ATTA-GATAC CCCG CTA TGC TTA -GC CATAAACTTT GATAT T  
 Rere ACTAAG-ATACAAC TGGG ATTA-GATAC CCCA CTA TGC TTA -GC CGTAAACTTT GATGT T  
 Gama GCCACG-AGACAAC TGGG ATTA-GATAC CCCA CTA TGC GTC -GC CGTAAAACCTT GACAC C  
 Onmy GCTAAG-AAACAAC TGGG ATTA-GATAC CCCA CTA TGC CTA -GC CGTAAACCTT GATAG A  
 Sasa GCTACG-ACACAAC TGGG ATTA-GATAC CCCA CTA TGC CTA -GC CGTAAACTTT GATGG A  
 Cola GCTATG-ATACAAC TGGG ATTA-GATAC CCCA CTA TGC CTA -GC CGTAAACTTT GATGG A  
 Dita ACTAGG-GACAAC TGGG ATTA-GATAC CCCA CTA TGC TTA -GC CGTAAACTT GATAC G  
 Gogr TCTAAG-AGACAAC TGGG ATTA-GATAC CCCA CTA TGC TTA -GT CACAAACTT GACAC C  
 Chsl GCTAGG-AGACAAC TGGG ATTA-GTAAA CCCA CTA TGC CTA -GT CGTAAACCTC GACAC T  
 Atja GCTAAG-ACACAAC TGGG ATTA-GAGAC CCCA CTA TGC TTA -GC CGTAAACTTT GATAG A  
 lido GCTAAG-ACACAAC TGGG ATTA-GAGAC CCCA CTA TGC ATA -GC CGTAAACTTT GATAG A  
 Auja GCCTTG-ACACAAC TGGG ATTA-GATAC CCCA CTA TGC CTC -GC CGTAAACTTT GATAA T  
 Chag GCCACG-AAACAAC TGGG ATTA-GATAC CCCA CTA TGC CTC -GC CATAAACCTC GATTT T  
 Hami GCTAAG-GACAAC TGGG ATTA-GATAC CCCA TTA TGC TTA AGC TATAAACTTT GATAG A  
 Saun GCTATG-ACACAAC TGGG ATTA-GATAC CCCA TTA TGC CTA -GC CATAAACTTT GATAG A  
 Nema GCTTTG-ACACAAC TGGG ATTA-GATAC CCCA CTA TGC CCA -GC CGTAAACTTT GATAG T  
 Disp GCTAGG-ACACAAC TGGG ATTA-GATAC CCCA CTA TGC CTA -GC CGTAAACATT GATAG A  
 Myaf GCTGAG-GGACAAC CGGG ATTA-GATAC CCCG CTA TGC TCA -GC CGTAAACATC AATAA G  
 Lagu CCTATA-GACAAC TGGG ATTA-GATAC CCCA CTA TGT ATA -GC TATAAACCTT GATAG G  
 Trtr GCTATA-GACAAC TGGG ATTA-GATAC CCCA CTA TGT GTA -GC CGTAAACTCT GATAG C  
 Zucr GCTATA-GACAAC TGGG ATTA-GATAC CCCA CTA TGT ATA -GC TGTAAACTTC GATAG C  
 Pxja GCTATA-AAACAAC TGGG ATTA-GATAC CCCA CTA TGT ATA -GC CTAAACCTT GATAG A  
 Pxlo GCTATA-AAACAAC TGGG ATTA-GATAC CCCA CTA TGT ATA -GC CTAAACCTT GATAG A  
 Pctr GCCACA-AAACAAC TGGG ATTA-GATAC CCCA CTA TGT GTC -GC CCTAAACTTT GATAG A  
 Apsa TCCATA-TACAAC TGGG ATTA-GATAC CCCA CTA TGT ATC -GC TATAAACAAA GATGG T  
 Cabe GCTAAG-GTACAAC TGGG ATTA-GATAC CCCA CTA TGC TTA -GC CGTAAACGCA GGTGT G  
 Bzze GCTAAG-ACACAAC TGGG ATTA-GATAC CCCA CTA TGC TTA -GC CCTAAATATA GATAG T  
 Siim ACTAAG-GACAAC TGGG ATTA-GATAC CCCA CTA TGC TGC -GT TGTAACAAA GATAG C  
 Ctru GCTAAG-ACACAAC TGGG ATTA-GATAC CCCA CTA TGC TTA -GT CCTAAACCTT GATAG A  
 Dpbr GCTAAG-ACACAAC TGGG ATTA-GATAC CCCA CTA TGC TTA -GT CCTAAACATT GATAG A  
 Caki GCCATA-ACACAAC TGGG ATTA-GATAC CCCA CTA TGT ATC -GC GTTAAAAATT GATGG T  
 Phja ACCATA-AAACAAC CGGG ATTA-GATAC CCCA TTA TGT ATC -GT CGTAAACTT GATGG C  
 Brsp GCCAAG-ACCTAAC AGGG ATTA-GATAC CCCT TTA TACT TGC -GC CCTAAACAAT AGCAT T  
 Gamo GCCATA-AAACAAC TGGG ATTA-GATAC CCCA CTA TGT ATC -GT CGTAAACATT GATGG T  
 Lolo GCCATA-AAACAAC TGGG ATTA-GATAC CCCA CTA TGT ATC -GT TGTTAACATT GATGG T  
 Batr ACTAAA-GACAAC TGGG ATTA-GACAC CCCA CTA TGT CTC -AT CGTAAACTTT -----  
 Prmy GCTATT-ATACAAC TAGG ATTA-GACAC CCTA CTA TGC TTA -GT CGTAAACTTT -----  
 Loli GCTGCG-GACAAC TGGG ATTA-GAAAC CCCA CTA TGC CCA -GC CCTAAACATT GGTAG C  
 Loam GCTACG-GACAAC TGGG ATTA-GAAAC CCCA CTA TGC CTA -GC CCTAAACATT GGCAA C  
 Chab GCTAGG-GACAAC TGGG ATTA-GATAC CCCA CTA TGC CTA -GC CGTAAACAAT GACAA T  
 Chto GCTGGG-GACAAC TGGG ATTA-GATAC CCCA CTA TGC CTA -GC CGTAAACAAT GACAA T  
 Majo GCCAGG-AAACAAC TGGG ATTA-GATAC CCCA CTA TGC CTC -GC TGTAACATT GATAA A  
 Hlst GCTAGG-GTACAAC TGAG ATTA-GATAC CCCA CTA TGC CTA -GC CTCAACAAT GATAA T  
 Clpe GCTGGG-GACAAC TGGG ATTA-GATAC CCCA CTA TGC CCT -GC CGTAAACCAA GATAA T  
 Mlmr GCTGAG-ACCCAAC TGGG ATTA-GAGAC CCCA CTA TGC CCA -GC CCTAAACTAT GATAA T  
 Crcr GCTGTG-AAACAAC TGGG ATTA-GATAC CCCA CTA TGC CCA -GC CCTAAACTTT GATAA T  
 Muce GCTGTG-AAACAAC TGGG ATTA-GATAC CCCA CTA TGC CCA -GC CCTAAACTTT GATAA T  
 Bege GCTGTG-AAACAAC TGGG ATTA-GAAAC CCCA CTA TGC CCA -GC CCTAAACTTT GATAA C  
 Mela GCTGAG-AAACAAC TGGG ATTA-GATAC CCCA CTA TGC TCA -GC CCTAAACTTT AATAG T  
 Hats GTTGGG-AAACAAC TGGG ATTA-GATAC CCCA CTA TGC CCA -AC CCTAAACTTT GATAG A  
 Orla ACTATG-AAACAAC TGGG ATTA-GATAC CCCA CTA TGC ATA -GC TGTAAACTTT GATGA A

Cosa GCTGTG-AAACAAC TGGG ATTA-GATAC CCCA CTA TGCACA-GC CCTAAACTCT GATAAA  
 Exsp GCTGTG-ACACAAC TGGG ATTA-GATAC CCCA CTA TGCACA-GC CGTAAACATA GATAAA  
 Depa GCTGTG-AAACAAC TGGG ATTA-GATAC CCCA CTA TGCACA-GC CCTAAACTAT GACAGT  
 Rima GCTGTG-ACACAAC TGGG ATTA-GATAC CCCA CTA TGCACA-GC CGTAAACCTT AGCTAA  
 Fuol GCTGTG-AAACAAC TGGG ATTA-GATAC CCCA CTA TGCACA-GC CATAAACTTT GATAAA  
 Gmaf GCTGCG-AAACAAC TGGG ATTA-GATAC CCCA CTA TGCACA-GC CATAAACTTT GATAGA  
 Xeei GCTGTG-AAACAAC TGGG ATTA-GATAC CCCA CTA TGCACA-GC CGTAAACTTT GGTAGC  
 Pros GCTACG-CAACAAC TGGG ATTA-GATAC CCCA CTA TGCOTA-GC CCTAAACATT GATGAT  
 Scmi GCTACG-AAACAAC TGGG ATTA-GATAC CCCA CTA TGCOTA-GC CCTAAACATT GATGGT  
 Rolo GCTATG-TCACAAC TGGG ATTA-GATAC CCCA CTA TGCOTA-GC CCTAAACATT GATAAC  
 Cere GCTACG-GTCAAAC TGGG ATTA-GATAC CCCA CTA TGCOTA-GC CCTAAACATT GATAGC  
 Daga GCTATG-ATACAAC TGGG ATTA-GATAC CCCA CTA TGCOTA-GC CCTAAACATT GATAGC  
 Anco GCTACG-ACACAAC TGGG ATTA-GATAC CCCA CTA TGCOTA-GC CTTAAACATT GATAGT  
 Dmve GCTACG-GCACAAC TGGG ATTA-GATAC CTCA CTA TGCOTA-GC CCTAAACAAT GACAGC  
 Dmar GCTATG-GCACAAC TGGG ATTA-GATAC CTCA CTA TGCOTA-GC CCTAAACACT GATAGC  
 Anka GCTAAG-ACACAAC TGGG ATTA-GATAC CCCA CTA TGCOTA-GC CCTAAACATT GATAGT  
 Moja GCTATG-ACACAAC TGGG ATTA-GATAC CCCA CTA TGCOTA-GC CCTAAACATT GACAGT  
 Hoja GCTATG-ACACAAC TGGG ATTA-GATAC CCCA CTA TGCOTA-GC CCTAAACATT GATAGT  
 Bede GCTACG-TAACAAAC TGGG ATTA-GATAC CCCA CTA TGCOTA-GC CCTAAACATA GATAGT  
 Bsp GCTACG-TAACAAAC TGGG ATTA-GATAC CCCA CTA TGCOTA-GC CCTAAACATA GATAGT  
 Mysp GCTATG-CCACAAC TGGG ATTA-GATAC CCCA CTA TGCOTA-GC CATAAACATC GATAGT  
 Osja GCTATG-TCACAAC TGGG ATTA-GATAC CCCA CTA TGCOTA-GC CATAAACATC GATAGT  
 Sgro GCTATG-AAACAAC TGGG ATTA-GATAC CCCA CTA TGCOTA-GC CATAAACATA GATAGC  
 Pzpa GCTACA-AAACAAC TGGG ATTA-GATAC CCCA CTA TGTGTA-GC TGTAACCTTT GATGGT  
 Zeja GATGCA-AAACAAC TGGG ATTA-GATAC CCCA CTA TGTGCA-TC CGTTAACCTT GATGGT  
 Zzne GCTACA-AAACAAC TGGG ATTA-GATAC CCCA CTA TGTGTA-GC CGTAAACCTT GATGGT  
 Zefa GCTACA-AAACAAC TGGG ATTA-GATAC CCCA CTA TGTGTA-GC CGTAAACCTT GATGGT  
 Acni GCTGCA-AAACAAC TGGG ATTA-GATAC CCCA CTA TGTGCA-GC CGTAAACCTT GATGGA  
 Ncrh GCTGCA-AAACAAC TGGG ATTA-GATAC CCCA CTA TGTGCA-GC CGTAAACCTT GATGGA  
 Agca GCTATG-ACACAAC TGGG ATTA-GATAC CCCA CTA TGCOTA-GC CATAAACATC GACAA  
 Hydy GCTAAG-TTACAAC TGGG ATTA-GATAC CCCA CTA TGCOTA-GC CCTAAACATT GGTAGT  
 Gsac GCTACG-GCACAAC TGGG ATTA-GATAC CCCA CTA TGCOTA-GC CCTAAACATT GATAGA  
 Pevo GCCATGAAAACAAC TGGG ATTA-GATAC CCCA CTA TGCOTA-GC CGTAAACAAT AATAAG  
 Hiku ACTATG-AAACAAC TGGG ATTA-GATAC CCCA CTA TGCOTA-GT CTTAAACAAA AGTAT  
 Inpa GCTAAG-GCACAAC TGGG ATTA-GATAC CCCA CTA TGCOTA-GC CCTAAACATA AATAGC  
 Auch GCTAAG-AAACAAC TGGG ACTA-GATAC CCCA CTA TGCOTA-GC TGTAACAAT GATGGG  
 Fico GCTAAG-AAACAAC TGGG ATTA-GATAC CCCA CTA TGCOTA-GC CCTAAACATC GACAGG  
 Macs GCTATG-TCACAAC TGGG ATTA-GATAC CCCA CTA TGCOTA-GC CGTAAACATT GATACA  
 Moal GCTATG-GTACAAC TGGG ATTA-GATAC CTCA CTA TGCOTA-GC CATAACAAT AATAAA  
 Syma GCTATG-ACACAAC TGGG ATTA-GATAC CCCA CTA TGCOTA-GC TATAACCTT AATAGT  
 Mafr GCTAAG-CCACAAC TGGG ATTA-GATAC CCCA CTA TGCOTA-GC CTTAAACATT AATAGC  
 Dcpe GCTAAG-GAACAAC TGGG ATTC-GATAC CCCA CTA TGCOTA-GC CGTAAACTAA GATAGG  
 Dcti GCTAAG-GAACAAC TGGG ATTC-GATAC CCCA CTA TGCOTA-GC CGTAAACAAA GATAGA  
 Hehi GCTCTG-GCACAAC TGGG ATTA-GATAC CCCA CTA TGCOTA-GC CCTAAACCTT GGCAAT  
 Stam GCTATG-GTACAAC TGGG ATTA-GATAC CCCA CTA TGCOTA-GC CCTAAACATT GATAGT  
 Hogi GCCACG-GTACAAC TGGG ATTA-GAGAC CCCA CTA TGCOTA-GC CGTAAACTTT GATAGT  
 Erzo GCTAAG-ACACAAC TGGG ATTA-GATAC CCCA CTA TGCOTA-GC CCTAAACCTT GATAGT  
 Hxot GCTACG-GAACAAC TGGG ATTA-GATAC CCCA CTA TGCOTA-GC CGTAAACATT GATAGT  
 Core GCTAAG-GAACAAC TGGG ATTA-GATAC CCCA CTA TGCOTA-GC CTTAAACATT GATAGT  
 Apve GCTACG-GCACAAC TGGG ATTA-GATAC CCCA CTA TGCOTA-GC CCTAAACATT GATAGT  
 Latj GCTGAG-AAACAAC TGGG ATTA-GATAC CCCA CTA TGCOTA-GC CCTAAACATT GACTTC  
 Laja ACTAAG-ACACAAC TGGG ATTA-GATAC CCCA CTA TGCOTA-GC TGTAACATT GATAGT



Syja GCTAGG - GCACAAC TGGG ATTA - GATAC CCCA CTA TGCCTA - GC TGTAACATA GATAGC  
 Epme GCCAAG - ATACAAC TGGG ATTA - GATAC CCCA CTA TGCCTC - GC CCTAACATT GATAGC  
 Grse GCTAAG - GCACAAC TGGG ATTA - GATAC CCCA CTA TGCCTI - GC CCTAACATT GATAGT  
 Clja GCTAAG - GTACAAC TGGG ATTA - GATAC CCCA CTA TGCCTA - GC CGTAAACACT GGTAGC  
 Ogcy GCTGAG - GCACAAC TGGG ATTT - GATAC CCCA CTA TGCCTA - GC CATAAACTTT GATAGT  
 Plna GTTGGG - AAACAAC TGGG ATTA - GATAC CCCA CTA TGCCTA - GC CCTAACCTT GATAGA  
 Lema GCTACG - ACACAAC TGGG ATTA - GATAC CCCA CTA TGCCTA - GC CTTAAACATT GGCAAC  
 Etzo GCTATG - ATACAAC TGGG ATTA - GATAC CCCA CTA TGCCTA - GC CGTAAACATT GGTAA C  
 Apse GCTAAG - AAACAAC TGGG ATTA - GATAC CCCA CTA TGCCTA - GC CCTAAAATTA GATAGA  
 Epde GCTATG - ACACAAC TGGG ATTA - GATAC CCCA CTA TGCCTA - GC CCTAACATT GATAGT  
 Slja GCTAAG - GCACAAC TGGG ATTA - GATAC CCCA CTA TGCCTA - GC CCTAACATT GACAA C  
 Bsja GCTAGG - ACACAAC TGGG ATTA - GATAC CCCA CTA TGCCTA - GC CGTCAACATC GACAGC  
 Ecna GCTAAG - AAACAAC TGGG ATTA - GATAC CCCA CTA TGCCTA - GC CCTAACATT GATTG T  
 Cohi GCTAAG - AAACAAC TGGG ATTA - GATAC CCCA CTA TGCCTA - GC CCTAACATT GACTG T  
 Caar GCTAAG - AAACAAC TGGG ATTA - GATAC CCCA CTA TGCCTA - GC CTTAAACATT GATTAT  
 Came GCTAAG - AAACAAC TGGG ATTA - GATAC CCCA CTA TGCCTA - GC CTTAAACATT GATTG T  
 Mema GCTAAG - AAACAAC TGGG ATCA - GATAC CCCA CTA TGCCTA - GC CCTAACATC GATCAC  
 Lenu GCTAGG - AAACAAC TGGG ATTA - GATAC CCCA CTA TGCCTA - GC CGTAAACTAA AACAG T  
 Plma GCTATG - GAACAAC TGGG ATTA - GATAC CCCA CTA TGCCTA - GC CGTAAACATT GATAGA  
 Emst GCTATG - ACACAAC TGGG ATTA - GATAC CCCA CTA TGCCTA - GC CCTAACATC GACAG T  
 Ptti GCTATG - ATACAAC TGGG ATTA - GATAC CCCA CTA TGCCTA - GC CATAAACATT GATAG T  
 Losu GCCAGG - AAACAAC TGGG ATTA - GATAC CCCA CTA TGCCTC - GT CCTAAAATA GATAA C  
 Geoy GCTAAG - GCACAAC TGGG ATTA - GATAC CCCA CTA TGCCTA - GC CCTAACATA GATAGA  
 Dipi GCTATG - GTACAAC TGGG ATTA - GATAC CCCA CTA TGCCTA - GC CCTAAATATT GATAGA  
 Pama GCTAAG - ATACAAC TGGG ATTA - GATAC CCCA CTA TGCCTA - GC CGTAAACATT GACAG T  
 Leob GCTAGG - GCACAAC TGGG ATTA - GATAC CCCA CTA TGCCTA - GC CATAAACATT GACAG T  
 Neba ACTGGG - AAACAAC TGGG ATTA - GAGAC CCCA CTA TGCCTA - GT CTTAAACACA AACGG T  
 Pdpi GCTAAG - GAACAAC TGGG ATTA - GATAC CCCA CTA TGCCTA - GC CCTAAACAAT GACTG T  
 Nimi GCTAAG - GTACAAC TGGG ATTA - GATAC CCCA CTA TGCCTA - GC CCTAACATT GACAA C  
 Uptr GCCAGG - GAACAAC TGGG ATTA - GATAC CCCA CTA TGCCTC - GC TGTAACATT GATAA A  
 Pesc ACTATG - ATACAAC TGGG ATTA - GATAC CCCA CTA TGCCTA - GC CGTAAAATT GATAG T  
 Baar GCCATG - AAACAAC TGGG ATTA - GATAC CCCA CTA TGCCTC - GC CCTAAAATT GATAG C  
 Moar GCTATG - ACACAAC TGGG ATTA - GATAC CCCA CTA TGCCTA - GC CCTAACATT GACAG T  
 Toja GCTGGG - GAACAAC TGGG ATTA - GATAC CCCA CTA TGCCTA - GC CCTAACATT GAACA A  
 Chau GCTAGG - GCACAAC TGGG ATTA - GATAC CCCA CTA TGCCTA - GC CCTAACATT GACAG T  
 Chse GCTAGG - GCACAAC TGGG ATTA - GATAC CCCA CTA TGCCTA - GC CATAAACATA GACAG T  
 Enar GCTAAG - GTACAAC TGGG ATTA - GATAC CCCA CTA TGCCTA - GC CTTAAACATC GATAG T  
 Hpty GCTATG - ATACAAC TGGG ATTA - GATAC CCCA CTA TGCCTA - GC CCTAACATC GATAG C  
 Nana GCTAGG - ACACAAC TGGG ATTA - GATAC CCCA CTA TGCCTA - GC CATAAACATT GATAG T  
 Mcst GCTATG - ACACAAC TGGG ATTA - GATAC CCCA CTA TGCCTA - GC CTTAAACCTT GATAG T  
 Rhox GCTATG - GCACAAC TGGG ATTA - GATAC CCCA CTA TGCCTA - GC CCTAACATC AATAG T  
 Opfa GCTATG - ACACAAC TGGG ATTA - GATAC CCCA CTA TGCCTA - GC CATAAACATT GATAG T  
 Paar GTTATG - GTACAAC TGGG ATTA - AATAC CCCA CTA TGCCTA - GC CCTAACATT GATAG T  
 Gozo GCTAGG - ATACAAC TGGG ATTA - GATAC CCCA CTA TGCCTA - GC CCTAACATC GATAG T  
 Ackr GCCAGG - GAACAAC TGGG ATTA - GATAC CCCA CTA TGCCTC - GC CTTAAACTTT GACAG C  
 Elev GCTATG - ATACAAC TGGG ATTA - GATAC CCCA CTA TGCCTA - GC CCTAACATT GATGG G  
 Trdu GCTGCG - AAACAAC TGGG ATTA - GATAC CCCA CTA TGCCTA - GC CCTAACCTT GATAG T  
 Amoc GCTGTG - ACACAAC TGGG ATTA - GATAC CCCA CTA TGCCTA - GC CCTAAAATTT GATAG G  
 Hame GCTATG - GTACAAC TGGG ATTA - GATAC CCCA CTA TGCCTA - GC CCTAAACTTA GATAT T  
 Chso GCTATG - GCACAAC TGGG ATTA - GATAC CCCA CTA TGCCTA - GT CGTAAACC - T AACAG C  
 Lyto GCTACG - GCACAAC TGGG ATTA - GATAC CCCA CTA TGCCTA - GC CCTAACATT GATAG T  
 Encr GCTACG - GCACAAC TGGG ATTA - GATAC CCCA CTA TGCCTA - GC CCTAACATT GATAG T

Bvar GCTAGG-AGACAAC TGGG ATTA-GATAC CCCA CTA TGCCTA-GC CCTAACATT TATAG T  
 Noco GCTAGG-GACAAC TGGG ATTA-GAGAC CCCA CTA TGCCTA-GC CGTAAACATT GATAGA  
 Chsp GCCAAG-AAACAAC TGGG ATTA-GATAC CCCA CTA TGCCTA-GC CCTAACATT GGTGAT  
 Arja GCTACG-GTACAAC TGGG ATTAAGATAC CCCA CTA TGCCTA-GC CCTAACATT GATAG T  
 Pase GCTTTG-GACAAC TGGG ATTA-GATAC CCCA CTA TGCCTA-GC CTTAACCTT GATGAC  
 Trel GCTAGG-GACAAC TGGG ATTA-GATAC CCCA CTA TGCCTA-GC CATAACATA GATGAT  
 Lifa ACTGGG-AGACAAC TGGG ATTA-GATAC CCCA CTA TGCCTA-GT TGTAAGTT GATGGG  
 Acur GCTAAG-AAACAAC TGGG ATTA-GATAC CCCA CTA TGCCTA-GC CTCAACATT GATAG T  
 Ampe GCTATG-ACACAAC TGGG ATTA-GATAC CCCA CTA TGCCTA-GC CCTAACATC GATAG C  
 Urja GCTAGG-ACACAAC TGGG ATTA-GATAC CCCA CTA TGCCTA-GC CTAAATAAA GGCAG C  
 Enet GCTGAG-AAACAAC TGGG ATTA-GATAC CCCA CTA TGCCTA-GC TGTAACATT GATAG C  
 Ptbr GCTATG-GACAAC TGGG ATTA-GATAC CCCA CTA TGCCTA-GC CCTAACTTT TATAG T  
 Safa GCTAGG-ACACAAC TGGG ATTA-GATAC CCCA CTA TGCCTA-GC ACTAACCTA GATGAA  
 Icae GCTATG-TCACAAC TGGG ATTA-GATAC CCCA CTA TGCCTA-GC CGTAAACATT GATAGA  
 Asmi GCTAAG-ACACAAC TGGG ATTA-GATAC CCCA CTA TGCCTA-GC CCTAACCTA GACAA C  
 Foal GCTAGG-AAACAAC TGGG ATTA-GATAC CCCA CTA TGCCTA-AC TATAAACCCC GATAA T  
 Drze GCTGAG-AAACAAC TGGG ATTA-GATAC CCCA CTA TGCCTA-GT CGTAACTAT GGTAG T  
 Rhas GCCAGG-ATACAAC TGGG ATTA-GATAC CCCA CTA TGCCTA-GC CCTAACAAA GGCAG C  
 Elac GCTAGG-ATACAAC TGGG ATTA-GATAC CCCA CTA TGCCTA-GC CATAACAAA AGTGC C  
 Kugu GCTAGG-ACACAAC TGGG ATTA-GATAC CCCA CTA TGCCTA-GC CATAACATA GATAG T  
 Plor GCTAAG-ATACAAC TGGG ATTA-GATAC CCCA CTA TGCCTA-GC CCTAACATT GGTAA C  
 Sgun GCTAGG-GACAAC TGGG ATTA-GATAC CCCA CTA TGCCTA-GC CCTAACATT GACAA T  
 Zaco GCTAGG-GTACAAC TGGG ATTA-GGTAC CCCA CTA TGCCTA-GC CCTAACATC GGTAG C  
 Zbf I GCTAAG-ACACAAC TGGG ATTA-GATAC CCCA CTA TGCCTA-GC CTTAACATT GATGAC  
 Spba GCTGAG-AAACAAC TGGG ATTA-GATAC CCCA CTA TGCCTA-GT CCTAACATC GATCG T  
 Game GCTATG-ATACAAC TGGG ATTA-GATAC CCCA CTA TGCCTA-GC CATAACATT GATAGA  
 Thth GCTATG-ACACAAC TGGG ATTA-GATAC CCCA CTA TGCCTA-GC CGTAAACATT GATAGA  
 Xigl GCTAAG-AAACAAC TGGG ATTA-GATAC CCCA CTA TGCCTA-GC CCTAACATC GATTA T  
 Hyja GCTAAG-GACAAC TGGG ATTA-GATAC CCCA CTA TGCCTA-GC CGTAAACATT GATAGA  
 Psan GCTAAG-AAACAAC TGGG ATTA-GATAC CCCA CTA TGCCTA-GC CGTAAACATT GATAG T  
 Cupa GCTATG-GACAAC TGGG ATTA-GATAC CCCA CTA TGCCTA-GC CGTAAACATT GATAGA  
 Mpch GCCAAG-ACACAAC TGGG ATTA-GATAC CCCA CTA TGCCTA-GC CCTAACATT GATAGA  
 Char GCTAAG-AAACAAC TGGG ATTA-GATAC CCCA CTA TGCCTA-GC CTTAACATT GATAG C  
 Pser GCTAAG-AAACAAC TGGG ATTA-GATAC CCCA CTA TGCCTA-GC CTTAACATT GATTG T  
 Prol GCTAAG-GACAAC TGGG ATTA-GATAC CCCA CTA TGCCTA-GC CCTAACATC GATTG T  
 Plbi GCTAAG-GACAAC TGGG ATTA-GATAC CCCA CTA TGCCTA-GC CCTAACATC GATTG C  
 Calu GCTGGG-ACACAAC TGGG ATTA-GATAC CCCA CTA TGCCTA-GC CCTAACATA GACTGA  
 Papa GCTAAG-AAACAAC TGGG ATTA-GAGAC CCCA CTA TGCCTA-GC CCTAAATTGA TTAAAT  
 Suf r GCTAAG-GACAAC TGGG ATTA-GATAC CCCA CTA TGCCTA-GC CCTAACATT GATGG T  
 Stci GCTAAG-AAACAAC TGGG ATTA-GATAC CCCA CTA TGCCTA-GC CCTAACATT GATAG G  
 Taru GCTAGG-ACACAAC TGGG ATTA-GATAC CCCA CTA TGCCTA-GC CCTAACAC-GATAT G  
 Rala GCTACG-GTACAAC TGGG ATTA-GATAC CCCA CTA TGCCTA-GC CGTAAACATT GATAG T

\*\*\* \*\* \* \* \*\*\* \*\*

|      | HVR        | C'             | 27'     | 18' | 28  | 29                       |
|------|------------|----------------|---------|-----|-----|--------------------------|
| Scca | A-C-----   | CCTACTA---     | TTGTC   | GCC | AAG | -TACTAC AAGC --GCT-----  |
| Muma | AC-----    | TTCACCA---     | TTGTT   | GCC | AAG | -TACTAC AAGC --GCT-----  |
| Erca | ATA-----   | AATACCC---     | CCGTC   | GCC | CGT | -TACTAC GAGC --GTA-----  |
| Pose | A-T-----   | AAATACTA---    | CCGCC   | GCC | AGT | -TACTAC GAGC --GCA-----  |
| Actr | -----      | AAATTACA---    | TTACC   | GCC | AGG | -TACTAC GAGC --GCT-----  |
| Scal | -----      | TAAATCACACA--- | TTGCC   | GCC | AGG | -TACTAC GAGC --GCT-----  |
| Posp | A-A-----   | ATTACA---      | TCACC   | GCC | AGG | -TACTAC GAGC --GCT-----  |
| Atsp | AAG-----   | ATACCGAA---    | TTATC   | GCC | AGG | -GACTAC AAAG --CGCT----- |
| Leoc | AGA-----   | ATACAAA---     | TTATC   | GCC | AGG | -GACTAC AAGC --GCC-----  |
| Amca | AAA-----   | ATACAAA---     | TTATC   | GCC | AGG | -GACTAC GAGC --GTT-----  |
| Osbi | AAC-----   | ACACTCA---     | CCAAT   | GCC | AGG | -AACTAC GAGC --GCA-----  |
| Pabu | AAAA-----  | TACAAT---      | CTACC   | GCC | AAG | -TACTAC AAGC G-AAT-----  |
| Hial | A-A-----   | GGTACAAA---    | TTATC   | GCC | AGG | -GACTAC AAGC --ATT-----  |
| Elha | -----      | AAAACACAAA---  | TCATC   | GCC | AGG | -GACTAC AAGC --GTC-----  |
| Mlcy | AAG-----   | A-TACAAA---    | CTATC   | GCC | CGG | -AACTAC AAGC --GCT-----  |
| Algl | A-T-----   | GATACAGA---    | TTATC   | GCC | AGG | -GACTAC AAGC --GCT-----  |
| Ptgi | -----      | AAAGTACAGA---  | TCATC   | GCC | AGG | -GACTAC AAGC --GCC-----  |
| Alaf | AAA-----   | GTACAAA---     | TTACC   | GCC | AGG | -GACTAC AAGC --ACT-----  |
| Nock | AA-----    | TATACACA---    | TTACC   | GCC | AGG | -GACTAC AAGC --ACT-----  |
| Anja | A-A-----   | AATACAAA---    | TCATC   | GCC | AGG | -GACTAC GAGC --GTT-----  |
| Gyki | AAA-----   | CCTACAAA---    | TCGCC   | GCC | AGG | -AACTAC GAGC --CCT-----  |
| Syka | ATAA-----  | TACAAA---      | TCATC   | GCC | AGG | -GACTAC GAGC --GCC-----  |
| Opma | AA-----    | TTTACAAA---    | CCGCC   | GCC | AGG | -AATTAC GAAC --ACT-----  |
| Comy | AAT-----   | ACACAAA---     | TCATC   | GCC | AGG | -GATTAC GAGC --AA-----   |
| Sasp | AT-----    | ATACA-C-CA     | CTATC   | GCC | AGG | -AATAAC GAGC --ACCC----- |
| Eupe | -----      | TA-----        | GCATC   | GCC | AGG | -TACTAC AAGC --TC-----   |
| Enja | A-A-----   | TGTACAACT---   | GCATC   | GCC | AGG | -AACTAC GAGC --ACC-----  |
| Same | T-----     | CAATACAATA---  | GATATC  | GCC | AGG | -GACTAC GAGC --GCT-----  |
| Chch | CC-----    | TTTACCAC---    | C-ATACC | GCC | TGG | -AACTAC GAGC --GCT-----  |
| Grgr | AGC-----   | CTACCCT---     | GCATC   | GCC | TGG | -GACTAC GAGC --AA-----   |
| Caau | CA-----    | ACTACAAT---    | ATGTC   | GCC | AGG | -TACTAC GAGC --ATT-----  |
| Cyca | C-----     | AGCTACAATA---  | ATGTC   | GCC | AGG | -TACTAC GAGC --ATT-----  |
| Dare | T---A----- | ATCACAAAC---   | ATGTT   | GCC | CGA | -CACTAC AAGC --AT-----   |
| Cost | ACT-----   | TCACAAA---     | ACGTC   | GCC | AGG | -TACTAC GAGC --ATT-----  |
| Leec | A-T-----   | TCCACAACA---   | ACGTC   | GCC | AGG | -TACTAC GAGC --GTT-----  |
| CrIa | TA-----    | ATCACAAC---    | A-ACGTC | GCC | AGG | -TACTAC GAGC --GTC-----  |
| Clmc | TTA-----   | CATACAAA---    | GCATC   | GCC | TGG | -AACTAC GAGC --GCT-----  |
| Phin | AAA-----   | CTACAA-T---    | TTATC   | GCC | AGG | -GACTAC GAGC --GCT-----  |
| Icpu | -CT-----   | CTTACA---      | ACATC   | GCC | CGG | -TACTAC GAGC --A-C-----  |
| Psto | CC-----    | CTTACATA---    | ACATC   | GCC | CGG | -TACTAC GAGC --A-C-----  |
| Cora | ATTT-----  | TACAAA---      | CTATC   | GCC | AGG | -TACTAC GAGC --A-T-----  |
| Eisp | -----      | TA-----        | ACATT   | GCC | CGA | -TACTAC GAGC --ACC-----  |
| Apal | CTA-----   | TTCACCACA---   | ACATC   | GCC | CGT | -TACTAC GAGC --CCC-----  |
| Eslu | A-A-----   | TATACAAT---    | TTATC   | GCC | AGG | -AACTAC AAGC --ATC-----  |
| Dape | AC-----    | TATACAAT---    | TCCCC   | GCC | CGG | -AACTAC AAGC --ACT-----  |
| Glse | AA-----    | ACAATACAATT--- | TATATC  | GCC | AGG | -AACTAC AAGC --GCC-----  |
| Naar | -AT-----   | AATACAAC---    | A-ATATC | GCC | AGG | -GACTAC AAGC --GCC-----  |
| Baoc | A-A-----   | TATACAAC---    | G-ATATC | GCC | AGG | -TACTAC AAGC --GCC-----  |
| Opso | AA-----    | AATACAAC-T---  | A-ATATC | GCC | AGG | -GACTAC AAGC --GCC-----  |
| Alte | AT-----    | CCCACAATC---   | G-ACATC | GCC | AGG | -AACTAC GAGC --G-CT----- |
| Plap | C-T-----   | TCCACAAC---    | G-ACATC | GCC | CGG | -GACTAC GAGC --ACT-----  |

Plal AA-----CTCA**CCCC**--T-A**ATATC****CGCC****AGGG**-GACTAC**AAGC**--GTT-----  
 Sami AAT-----TTA**CCCTT**---A**ATGTC****CGCC****AGGG**-GACTAC**AAGC**--GC-----  
 Rere A-A-----TATACA**ACT**----A**GCATC****CGCC****AGGG**-AACTAC**AAGC**--GTC-----  
 Gama ATAA-----GTACA**ATT**----T**CTGTC****CGCC****AGGG**-GACTAC**AAGC**--ATC-----  
 Onmy A-A-----TATACA**ATT**----G**ATATC****CGCC****AGGG**-AACTAC**AAGC**--GCC-----  
 Sasa AAC-----ATACA**ACT**----G**ACATC****CGCC****AGGG**-GACTAT**AAGC**--GCC-----  
 Cola AA-----CATACA**AC**----T-A**ACATC****CGCC****AGGG**-AACTAC**AAGC**--GCC-----  
 Dita AA-----AATACA**AC**-T---A**GTATC****CGCC****CGGG**-AACTAC**AAGC**--GCC-----  
 Gogr -----**CCA**----C**CACTC****CGCC****AGGG**-GACTAC**GAGC**--GTA-----  
 Chsl CA-----TATACA**GC**----G-A**CGGTC****CGCC****AGGG**-AATTAC**AAGC**--ACC-----  
 Atja A-----AATT**GAA**----T**CTATC****CGCC****CGGG**-AACTAC**AAGC**--G-CT-----  
 lido A-A-----AATT**AAA**----T**CTATC****CGCC****TGGG**-AACTAC**AAGC**--GCT-----  
 Auja A-A-----AGTAC**ATC**-T---T**CTATC****CGCC****TGGG**-AACTAC**TAGC**--GCA-----  
 Chag G-----ATACATAC**ACAC**---A**TTATC****CGCC****AGGG**-TACTAC**GAGC**--GCT-----  
 Hami -AA-----CTTACA**ACA**----C**CTATC****CGCC****TGGG**-AACTAC**GAGC**--GCT-----  
 Saun A-T-----CTTACA**ACC**----T**CTATC****CGCC****TGGG**-AACTAC**GAGC**--GCT-----  
 Nema ACCC-----CAC**ATT**----T**CTATC****CGCC****CGGG**-AACTAC**AAGC**--ACC-----  
 Disp AAC-----GCCACA**AT**-----T**CTGTC****CGCC****CGGG**-TACTAC**AAGC**--ATT-----  
 Myaf CAT-----CTCACA**ACA**----C**TTATT****CGCC****TGGG**-AACTAC**AAGC**--ATT-----  
 Lagu C-C-----CCTAC**ACG**----T**CTATC****CGCC****CGGG**-GATTAC**GAGC**--ATC-----  
 Trtr TCAT-----TTAC**ATA**----G**CTATC****CGCC****AGGG**-TACTAC**GAGC**--GTT-----  
 Zucr TCA-----AGTAC**ATTA**---A**CTATC****CGCC****CGGG**-TACTAC**GAGC**--GTT-----  
 Pxja AT-----AACACA**AC**-C---C**CTATC****CGCC****TGGG**-AACTAC**GAGC**--ACC-----  
 Pxlo A-T-----AACACA**ACC**----C**CTATC****CGCC****CGGG**-AACTAC**GAGC**--ACC-----  
 Pctr A-T-----AACAC**ACCC**----C**CTATC****CGCC****AGGG**-GACTAC**AAGC**--ACC-----  
 Apsa GTAT-----CAC**ACA**----A**CCATT****CGCC****CGGG**-AACTAC**AAGC**--ACT-----  
 Cabe AGTA-----AT**CCC**-C---C**CTACT****CGCC****AGGG**-AACTAC**TAGC**--GG-----  
 Bzze TAT-----TT**ACCA**---A**CTGTC****CGCC****AGGG**-GACTAC**GAGC**--AC-----  
 Siim GTA-----AT**ACTA**-C--A**CTATC****CGCC****CGGG**-TACTAC**GAGC**--ACC-----  
 Ctru CCT-----A-CAC**ACC**-C---A**CTATC****CGCC****CGGG**-TACTAC**GAGC**--ACC-----  
 Dpbr CC-----CCCAC**ACC**-C---A**CTATC****CGCC****CGGG**-TACTAC**AAGC**--ACC-----  
 Caki AC-----TTCAC**TCGA**---A**CCATC****CGCC****CGGG**-AACTAC**GAGC**--CTC-----  
 Phja TTG-----CAT**ACCTA**---G**TCATC****CGCC****TGGG**-GACTAC**GAGC**--GA-----  
 Brsp CAC-----TA-AC**ACAG**---A**ATGCT****CGCC****CGGG**-TATTAC**GAGC**--TC TTAT----  
 Gamo T-T-----TATAC**CCAA**---A**CCATC****CGCC****TGGG**-AACTAC**GAGC**--AAT-----  
 Lolo TT-----TATA**CTTA**--A-A**CCATC****CGCC****TGGG**-TACTAC**GAGC**--ATT-----  
 Batr -----**GTAC**----**-----CGCC****AGGA**-GACTAC**GAGC**--CAC-----  
 Prmy -----**GACTC**----**-----CGCC****TGGA**-TACTAC**GAGT**--TAA-----  
 Loli -CC-----TGTAC**ACC**--C--G**CTGCC****CGCC****CGGA**-TACTAC**GAGC**--ATA-----  
 Loam ACA-----AAAC**ACCC**---G**TTGCC****CGCC****AGGG**-CACTAC**GAGC**--AT-----  
 Chab -GT-----ACCA**CCCC**-CC-A**TTGTC****CGCC****CGGG**-AACTAA**AAGC**--ACG-----  
 Chto -GT-----ACCA**CCCC**-CC-A**TTGTC****CGCC****CGGG**-GACTAA**AAGC**--ACG-----  
 Majo -AT-----ACCAC**AAAT**---A**TTATC****CGCC****CGGG**-TACTAC**GAGC**--A-CT-----  
 Hlst -AA-----CTTAC**ACAC**---A**TTATC****CGCC****AGGG**-GATTAC**AAGC**--A-A-----  
 Clpe A-A-----GTTA**CCAC**---A**TTATC****CGCC****CGGG**-AACTAC**GAGC**--GCA-----  
 Mlmr GA-----ACAA**CCCC**--C-G**TTATC****CGCC****CGGG**-AACTAC**AACC**--GCA-----  
 Crcr TTAT-----TAC**ACCC**---A**TTATC****CGCC****TGGG**-AACTAC**GAGC**--TTC-----  
 Muce TTA-----TCAC**ACCC**---A**TTATC****CGCC****TGGG**-AACTAC**GAGC**--TT-----  
 Bege -AA-----AATAC**ATT**-C--G**CTATC****CGCC****TGGG**-AACTAC**GAGC**--ATC-----  
 Mela ACTA-----TT**AT**-TG--A**CTATT****CGCC****TGGG**-AACTAC**GAGC**--GCT-----  
 Hats TG-----AATAC**ATC**-C--C**CTATC****CGCC****CGGG**-AACTAC**GAGC**--ACT-----  
 Orla -----CTGTTAC**AT**-T---A**TCATT****CGCC****AGGG**-TACTAC**GAGC**--ACC-----

Cosa AA-----CCTAC**ATT**-T---A**TTATC****CGCC****AGG**-TACTAC**GAGC**--TCT-----  
 Exsp AC-----TTTAC**ATA**-A---C**TTATC****CGCC****AGG**-TACTAC**GAGC**--ATT-----  
 Depa ATT-----TAC**ACCA**---A**CTGTT****CGCC****AGG**-TACTAC**AAGC**--TCT-----  
 Rima C-C-----CCTAC**ATAA**---T**TAGCC****CGCC****AGAA**-GATTAC**AAGC**--ATA-----  
 Fuol AAA-----TTT**ACAAT**---A**TTATC****CGCC****CGG**-TACTAC**GAGC**--ATA-----  
 Gmaf AA-----ACT**ACAAA**-T-T**CTATC****CGCC****CGG**-AACTAC**GAGC**--ATA-----  
 Xeei AC-----CTA**ACAAT**-T-A**CTACC****CGCC****CGG**-TACTAC**GAGC**--ATT-----  
 Pros -----**AC**-C---C**CCATC****CGCC****CGAA**-AACTAC**AAGC**--ATT-----  
 Scmi A-A-----GCCC**ACCCC**---G**CCATC****CGCC****CGGA**-AACT-C**GAGC**--ACT-----  
 Rolo AT-----TTT**ACCCC**---G**TTATC****CGCC****CGG**-AACTAC**GAGC**--A-TT-----  
 Cere AGT-----CC**ACTGA**---G**CTGTC****CGCC****TGG**-AACTAC**GAGC**--AG-----  
 Daga -----ATC-CTAC**ACC**---G**CTATC****CGCC****CGG**-AACTAC**AAGC**--ATT-----  
 Anco ATT-----ATAC**ACCC**---A**CTATC****CGCC****CGG**-AACTAC**GAGC**--AC-----  
 Dmve GTC-----ACAC**GTACC**---G**CTGTC****CGCC****CGG**-TACTAC**GAGC**--ACT-----  
 Dmar GT-----CGCAC**ATA**-CC-G**CTATC****CGCC****CGG**-TACTAC**GAGC**--ACT-----  
 Anka AC-----TTTAC**ACC**-C---A**CTATC****CGCC****AGG**-AACTAC**GAGC**--ACC-----  
 Moja AT-----CCTAC**ACC**-C---A**CTGTC****CGCC****CGG**-AACTAC**GAGC**--ACC-----  
 Hoja TCA-----ATAC**ACCC**---A**CTATC****CGCC****CGG**-AACTAC**GAGC**--AC-----  
 Bede AACA-----TACTCT--A**CTATC****CGCC****CGG**-AACTAC**GAGC**--ATT-----  
 Bosp A-----ACAT**ACTCC**---A**CTATC****CGCC****CGG**-AACTAC**GAGC**--A-TT-----  
 Mysp AT-----TATC**ACCT**--C-A**CTATC****CGCC****AGG**-AACTAC**GAGC**--AAT-----  
 Osja -----ACACC**ACCCC**---A**CTATC****CGCC****CGG**-AACTAC**GAGC**--AAT-----  
 Sgro AT-----CTC**ACCCC**---G**CTATC****CGCC****CGG**-AACTAC**GAGC**--A-AT-----  
 Pzpa TACT-----AATAC**CTAC**---C**CCATC****CGCC****TGG**-AACTAC**AAGC**--GAC-----  
 Zeja A-----ATTAT**ACATC**---C**CCATC****CGCC****TGG**-AACTAC**GAGC**--ATA-----  
 Znne AA-----CCTGT**ACC**-CT-T**CCATC****CGCC****TGG**-AACTAC**GAGC**--GCT-----  
 Zefa A-A-----CCCTT**ACCCCC**-CC**CCATC****CGCC****TGG**-AACTAC**GAGC**--ACC-----  
 Acni AGC-----AAT**ACCCTT**-C**CCATC****CGCC****TGG**-AACTAC**GAGC**--ACC-----  
 Ncrh AGCA-----AT**ACCCTT**-C**CCATC****CGCC****TGG**-AACTAC**GAGC**--ACC-----  
 Agca A-A-----ACTAC**ACCT**---G**TTGTC****CGCC****TGG**-AACTAC**GAGC**--ACT-----  
 Hydy T-C-----TTTACA**ATC**---A**CTACC****CGCC****TGG**-AACTAC**GAGC**--ATC-----  
 Gsac A-----TTTTACA**ACC**---A**CTATC****CGCC****CGG**-GACTAC**AAGC**--ATC-----  
 Pevo AGA-----**ACTA**---C**TTATT****CGCC****AGG**-TACTAC**GAGC**--ACT-----  
 Hiku TTA-----ATT**ACAT**---C**ATACT****CGCC****AGG**-TACTAC**GAGC**--TTT-----  
 Inpa AC-----CCC**ACCTCC**-G**CTATT****CGCC****CGG**-AACTAC**TAGC**--CCC-----  
 Auch A-C-----CTCAC**ACTCAA**-C**CCATC****CGCC****CGGA**-TACTAC**GAGC**--GCA-----  
 Fico C-T-----CGTACT**TCG**---C**CTGTC****CGCC****AGG**-TACTAC**AAGC**--ACC-----  
 Macs -----ACC-CT**ACCCC**---A**CCATC****CGCC****CGG**-AACTAC**GAGC**--ATC-----  
 Moal C-C-----CTAAT**ATC**---C**CTATT****CGCC****TGG**-AATTAC**GAGC**--CTC-----  
 Syma T-----CTATAC**AT**-A---A**CTATT****CGCC****AGG**-TACTAC**GAGC**--ACT-----  
 Maf r A-C-----TCTAC**ATTA**---G**CTATT****CGCC****AGG**-AACTAC**GAGC**--CCC-----  
 Dcpe ACCA-----TAC**ACA**---T**CTATC****CGCC****GAA**-AACTAC**GAGC**--GCA-----  
 Dct i ACC-----CT-AC**ACA**---T**CTATC****CGCC****CGAA**-TACTAC**GAGC**--GCA-----  
 Hehi AT-----ATCAC**ATAC**---C**CTGCC****CGCC****TGG**-AACTAC**GAGC**--ATC-----  
 Stam ACT-----CTAC**ATCC**---A**CTATC****CGCC****TGG**-AACTAC**GAGC**--AT-----  
 Hogi -----ACTACTAC**ACCC**---A**CTATC****CGCC****CGG**-GACTAC**GAGC**--ATT-----  
 Erzo GA-----CCTAC**GCC**-C---A**CTATC****CGCC****TGG**-GACTAC**GAGC**--ATC-----  
 Hxot AT-----CCTAC**ACC**-C---A**CTATC****CGCC****CGG**-AACTAC**GAGC**--AAA-----  
 Core ACT-----AT-AC**ACCC**---A**CTATC****CGCC****CGG**-TACTAC**GAGC**--AAT-----  
 Apve A-C-----TCTAC**ACCC**---A**CTATC****CGCC****AGG**-AACTAC**GAGC**--AAC-----  
 Lat j G-----CACTAC**ACCCG**-A-T**ATTTC****CGCC****CGG**-TATTAC**GAGC**--A-CT-----  
 Laja GTA-----AT-AC**ACC**---A**CTATC****CGCC****CGG**-AACTAC**GAGC**--ACT-----



Syja CAT-----CGCT**AC**CT---G**CTATC****CGCC****TGGG**-GACTAC**GAGC**--GTA-----  
 Epme TT-----TACACA**AC**-C---C**CTATC****CGCC****TGGA**-AACTAC**GAGC**--AAC-----  
 Grse GCAC-----TAC**ACCC**---A**CTATC****CGCC****CGGG**-AACTAC**GAGC**--ACC-----  
 Clja TG-----ACA**ACAAA**-C-A**CTGCC****CGCC****TGGA**-CACTAC**GAGC**--ACC-----  
 Ogcy A-A-----ACTAC**ACCC**---A**CTATC****CGCC****TGGG**-AACTAC**GAGC**--ATC-----  
 Plna CAT-----TG-**GTT**----T**CTATC****CGCC****TGGG**-TACTAC**TGGC**--GTT-----  
 Lema -AC-----TTTAC**ACCT**---G**CTGCC****CGCC****AGGA**-AACTAC**GAGC**--ATT-----  
 Etzo AC-----AATAC**ACC**-C--A**TTACC****CGCC****TGGG**-GACTAC**AAGC**--ATC-----  
 Apse ACA-----CTACCT**ACA**----C**CTATC****CGCC****CGGG**-TACTAC**GAGC**--ACC-----  
 Epde A-C-----ACTAC**ACCC**---A**CTATC****CGCC****CGGG**-TACTAC**GAGC**--ACC-----  
 Slja T-T-----TACAC**ACCC**---G**TTGTC****CGCC****TGGG**-AACTAC**GAGC**--AGC-----  
 Bsja ACC-----TTAC**ACCC**---G**CTGTC****CGCC****CGGG**-AACTAC**GAGC**--AA-----  
 Ecna -TT-----AATAC**ATCA**---A**ACATC****CGCC****CGGG**-AATTAC**GAAC**--A-TC-----  
 Cohi -----TTATTAC**ATA**----A**ACATC****CGCC****TGGG**-AACTAC**GAAC**--ATT-----  
 Caar T-----TACCAC**ATTT**---A**ACATC****CGCC****TGGG**-AATTAC**GAAC**--A-CT-----  
 Came TT-----ACTAC**ATC**--A--A**ACATC****CGCC****TGGG**-AATTAC**GAAC**--ATT-----  
 Mema -----ACC-CTAC**ACTT**---A**ACATC****CGCC****CGGG**-AACTAC**GAAC**--ACC-----  
 Lenu TCAT-----T**ACTCA**---A**CTGTT****CGCC****TGGG**-GACTAC**GAGC**--GCT-----  
 Plma AT-----AATAC**ACC**-T--T**CTATC****CGCC****TGGG**-TACTAC**GAGC**--ATT-----  
 Emst AAA-----CT-AC**ACCT**---G**CTGTC****CGCC****TGGG**-AACTAC**GAGC**--ATC-----  
 Ptti A-A-----CCTAC**ACCT**---A**CTATC****CGCC****CGGG**-TACTAC**GAGC**--ATC-----  
 Losu AC-----AGTAC**ATC**-T--G**TTATC****CGCC****GGGG**-TACTAC**GAGC**--ACT-----  
 Geoy AT-----GCC**ACCC**--T-T**CTATC****CGCC****CGGG**-TACTAC**GAGC**--ATT-----  
 Dipi GAAC-----TAC**ACCC**---A**CTATC****CGCC****CGGG**-TACTAC**GAGC**--ATC-----  
 Pama TG-----AATAC**ATT**---T-T**CTGTC****CGCC****CGGG**-TACTAC**GAGC**--ATT-----  
 Leob GT-----TATAC**ACC**--C-A**CTGTC****CGCC****TGGG**-AACTAC**GAGC**--GCA-----  
 Neba TGGC-----GCC**ACGTC**--C**CCGTT****CGCC****TGGT**-AACTAC**GAGC**TCACCGAAATTC  
 Pdpi -----GGCACTAC**ACCC**---C**ACATC****CGCC****CGGG**-TATTAC**GAAC**--GTC-----  
 Nimi A-C-----CATAC**ACCT**---G**TTGTC****CGCC****TGGG**-AACTAC**GAGC**--ATT-----  
 Uptr AT-----ACCAC**AAA**--T--A**TTATC****CGCC****CGGG**-TACTAC**GAGC**--ACT-----  
 Pesc CC-----ACTAC**AC**--CC--G**CTATC****CGCC****TGGG**-GACTAC**GAGC**--ACT-----  
 Baar A-----CACTAC**ACCC**---G**CTATC****CGCC****TGGG**-AATTAC**GTGC**--AACC-----  
 Moar A-----ACATAC**ACC**-T--A**CTGTC****CGCC****TGGG**-TACTAC**GAGC**--ATC-----  
 Toja AC-----ACCACA**AC**-T---A**ACTTC****CGCC****CGGG**-AATTAC**GAAC**--ATA-----  
 Chau T-A-----ATTAC**ACCC**---A**CTGTC****CGCC****TGGG**-AACTAC**GAGC**--ACC-----  
 Chse TCA-----CTT**ACCT**---A**CTGTC****CGCC****AGGG**-AATTAC**GAGC**--A-TT-----  
 Enar A-T-----AAT**ACA**ACT--A**TTATC****CGCC****TGGG**-AACTAC**GAGC**--ATC-----  
 Hpty -----GCACTAC**ACCT**---G**CTATC****CGCC****TGGG**-AACTAC**GAGC**--ACC-----  
 Nana ACA-----CCAC**ATA**-A--A**CTATC****CGCC****CGGG**-CACTAC**GAGC**--GCT-----  
 Mcst A-C-----TGCAC**ACCT**---A**CTATC****CGCC****TGGG**-AACTAC**GAGC**--ACC-----  
 Rhox A-----CAATAC**ACCC**---A**CTATT****CGCC****CGGG**-AACTAC**GAGC**--ACT-----  
 Opfa ATA-----CTACA**ACT**---A**CCATC****CGCC****CGGG**-AACTAC**GAGC**--AC-----  
 Paar AAG-----TC-AC**ACCC**---A**CTATC****CGCC****TGGG**-TACTAC**AAGC**--ACC-----  
 Gozo GCAA-----TAC**ATCC**---A**CTATC****CGCC****TGGG**-TACTAC**GAGC**--GTC-----  
 Ackr AA-----CCTAC**ACC**-C--G**CTGTC****CGCC****CGGG**-AATTAC**GAGC**--ACC-----  
 Elev -GTA-----CTAC**CTC**---C**CCATC****CGCC****TGGG**-AACTAC**GAGC**--AT-----  
 Trdu TCC-----CTAC**ACCC**---A**CTATC****CGCC****CGGG**-TACTAC**GAGC**--AC-----  
 Amoc C-C-----CCTAC**CC**--C--C**CTATC****CGCC****CGGG**-TACTAC**GAGC**--ATC-----  
 Hame A-A-----TCTAC**TTAT**---T**TTATC****CGCC****TGGG**-AACTAC**GAGC**--ATC-----  
 Chso T-----CCTTAC**AT**-T---CG**CTGTT****CGCC****CGGG**-AACTAC**GAGC**--GTA-----  
 Lyto -----ACC-CCAC**ACCC**---A**CTATC****CGCC****TGGG**-GACTAC**GAGC**--AGC-----  
 Encr -AT-----TATAC**ACCC**---A**CTATC****CGCC****TGGG**-AACTAC**GAGC**--A-TT-----

Bvar T-C-----CCTACA**ACC**-----T**CTATT****CGCC****TGGA**-AACTAC**GAGC**--GCG-----  
 Noco C-C-----AATACA**AC**-C----C**CTATC****CGCC****CGG**-AACTAC**GAGC**--ACC-----  
 Chsp -----GCT-AT**AC**CTC---A**TCATC****CGCC****CGG**-AATTAC**AAGC**--ATT-----  
 Arja GT-----AGTAC**ATC**---C-A**CTATC****CGCC****CGG**-AACTAC**GAGC**--AAT-----  
 Pase GA-----CTCAC**AAA**--AT-G**TCATC****CGCC****CGG**-TACTAC**GAGC**--GCA-----  
 Trel TTTT-----CAC**AAGT**----T**TCATC****CGCC****AGG**-TATTAC**GAGC**--TCC-----  
 Lifa TAA-----C-TAC**ACA**-----C**CCATC****CGCC****CGG**-TACTAC**AAGC**--GCA-----  
 Acur ACAC-----CAC**ATAT**---A**CTATC****CGCC****CGG**-TACTAC**GAGC**--ATT-----  
 Ampe G-C-----ACTAC**ATCT**---G**CTATC****CGCC****TGG**-AACTAC**GAGC**--ATC-----  
 Urja C-----TGAAC**ACC**----A**AACCC****CGCC****AGG**-AAGTAC**GAGC**--ACG-----  
 Enet ACA-----AATAC**ACAA**----G**CTATT****CGCC****CGG**-TACTAC**GAGC**--ACC-----  
 Ptbr T-A-----TTC**ACAAA**---A**GTATA****CGCC****AGG**-TATTAC**GAGC**--ATA-----  
 Safa CAT-----ATTAC**GT**A----A**TCATC****CGCC****TGG**-AACTAC**GAGC**--ACT-----  
 Icae A-----TAATAC**ACTT**----T**CTATC****CGCC****TGG**-AACTAC**GAGC**--ATT-----  
 Asmi TTTTATCTTC-ACCC**ACTTCC**--G**TTGTC****CGCC****AGG**-AACTAC**GAGC**--ATA-----  
 Foal A-C-----AACAC**AT**-----A**TTATC****CGCC****CGG**-TATTAC**GAGC**--ATA-----  
 Drze AA-----TCTACA**AT**---TA-T**CTACC****CGCC****TGG**-AATTAC**GAGC**--GAA-----  
 Rhas ATT-----CTCAC**ACCT**---G**CTGCT****CGCC****TGG**-AACTAC**GAGC**--ATT-----  
 Elac -----AAGCCCA**CCTCT**---G**CCACT****CGCC****AGG**-AACTAC**GAGC**--ATA-----  
 Kugu ATCA-----CTAC**ACCT**---A**CTATC****CGCC****TGG**-AACTAC**GAGC**--GC-----  
 Plor G-C-----CCCAC**ACCC**---G**TTACT****CGCC****CGA**-AACTAC**GAGC**--ATC-----  
 Sgun GAA-----CTACA**ACC**----A**TTGTC****CGCC****TGG**-AACTAC**GAGC**--AC-----  
 Zaco A-T-----TCTACA**GCT**----G**CTACC****CGCC****TGG**-TACTAC**GAGC**--ATC-----  
 Zbfl A-T-----CCTACA**AC**---T-G**TCATC****CGCC****CGG**-TACTAC**GAGC**--ATC-----  
 Spba C-T-----ACCACA**ACC**----C**CGATC****CGCC****TGG**-AATTAC**GAAC**--ACT-----  
 Game AT-----TTTAC**ACC**---C-T**CTATC****CGCC****TGG**-TACTAC**GAGC**--ATT-----  
 Thth ATT-----TT-AC**ACCC**---T**CTATC****CGCC****TGG**-TACTAC**GAGC**--ATT-----  
 Xigl T-A-----ATTAC**ACCC**---A**ATATC****CGCC****CGG**-AATTAC**GAGC**--ATC-----  
 Hyja -----ATA-TCAC**ACAAA**---T**CTATC****CGCC****TGG**-TACTAC**GGGC**--ATT-----  
 Psan TT-----ATTAC**ATA**-AA--T**CTATC****CGCC****TGG**-TACTAC**GGGC**--ATT-----  
 Cupa -GT-----CCTAC**ACCC**---T**CTATC****CGCC****TGG**-TACTAC**GAGC**--ATT-----  
 Mpch CTAT-----TAC**ACTC**---C**CTATT****CGCC****AGG**-TACTAC**GAGC**--ATT-----  
 Char -----ACC-CTAC**ATCA**---G**CTATT****CGCC****AGG**-GACTAC**GAGC**--ATA-----  
 Pser A-C-----CCTAC**ACCT**---A**CAATC****CGCC****CGG**-AATTAC**AAAC**--ATT-----  
 Prol AC-----ATTAC**ACT**-C-A**ACATC****CGCC****CGG**-AATTAC**AAAC**--GTT-----  
 Plbi A-T-----CATAC**ACTC**---C**ATATC****CGCC****CGG**-AATTAT**GAAC**--GTC-----  
 Calu A-A-----TTAAC**ACAT**---T**CTATC****CGCC****CGG**-AACTAC**GGAC**--ACT-----  
 Papa ATA-----T-AC**ATA**----C**ACTTC****TGCC****TGA**-AATTAC**GAAC**--GC-----  
 Suf r C-C-----CTTAC**ATTTA**-A-G**CCATC****CGCC****AGG**-GACTAC**GAGC**--ATT-----  
 Stci AG-----ATTAC**ACC**----T**CTATC****CGCC****TGG**-GACTAC**GAGC**--TTA-----  
 Taru A-A-----ACTAC**GT**A----C**ATATC****CGCC****TGG**-TACTAC**GAGC**--ATT-----  
 Rala AA-----ACTAC**ATG**-C-G**CTATC****CGCC****TGG**-AACTAC**GAGC**--ATT-----

\*\*\* \*

|      | 29'     | 28'   | 2'  | 30  | 31    | 32     |         |          |       |    |          |     |
|------|---------|-------|-----|-----|-------|--------|---------|----------|-------|----|----------|-----|
| Scca | -AGCTT  | -AAAA | CCC | AAA | GGACT | TGGCCG | TGCCCCA | CAC-CCAC | CTAGA | GG | AGCCTGTT | -CT |
| Muma | -AGCTT  | -AAAA | CCC | AAA | GGACT | TGGCCG | TATCCCA | CAC-CCAC | CTAGA | GG | AGCCTGTT | -CT |
| Erca | -AGCTT  | -AAAA | ACC | AAA | GGACT | TGGCCG | TGCTTCA | GAA-CCAC | CTAGA | GG | AGCCTGTT | -CT |
| Pose | -AGCTT  | -AAAA | CCC | AAA | GGACT | TGGCCG | TGCTTCA | GAA-CCAC | CTAGA | GG | AGCCTGTT | -CT |
| Actr | -AGCTT  | -AAAA | CCC | AAA | GGACT | TGGCCG | TGCCCCA | GAC-CCAC | CTAGA | GG | AGCCTGTT | -CT |
| Scal | -AGCTT  | -AAAA | CCC | AAA | GGACT | TGGCCG | TGCCCCA | GAC-CCAC | CTAGA | GG | AGCCTGTT | -CT |
| Posp | -AGCTT  | -AAAA | CCC | AAA | GGACT | TGGCCG | TGCCCCA | GAC-CCAC | CTAGA | GG | AGCCTGTT | -CT |
| Atsp | -AGCTT  | TAAAA | CCC | AAA | GGACT | TGGCCG | TGTCCCA | AAC-CCAC | CTAGA | GG | AGCCTGTT | -CT |
| Leoc | -AGCTT  | -AAAA | CCC | AAA | GGACT | TGGCCG | TGTCCCA | AAC-CCAC | CTAGA | GG | AGCCTGTT | -CT |
| Amca | -AGCTT  | -AAAA | CCC | AAA | GGACT | TGGCCG | TGCCCCA | GAC-CCAC | CTAGA | GG | AGCCTGTT | -CT |
| Osbi | TCGCTT  | -AAAA | CCC | AAC | GGACT | TGGCCG | TGCCTCA | CACTCCAC | CTAGA | GG | AGCCTGTT | -CT |
| Pabu | -AGCTC  | -GAAA | CCC | AAC | GGACT | TGGCCG | TGCCCCA | GAC-CCAC | CTAGA | GG | AGCCTGTT | -CT |
| Hial | -AGCTC  | -GAAA | CCC | AAA | GGACT | TGGCCG | TGCCCCA | GAC-CCAC | CTAGA | GG | AGCCTGTT | -CT |
| Elha | -AGCTT  | -AAAA | CCC | AAA | GGACT | TGGCCG | TGCCCCA | CAC-CCAC | CTAGA | GG | AGCCTGTT | -CT |
| Mlcy | -AGCTT  | -TAAA | CCC | AAA | GGACT | TGGCCG | TGCCCCA | AAC-CCAC | CTAGA | GG | AGCCTGTT | -CT |
| Algl | -AGCTT  | -AAAA | CCC | AAA | GGACT | TGGCCG | CACCTTA | GAT-CCCC | CTAGA | GG | AGCCCGTT | -CT |
| Ptgi | -AGCTT  | -AAAA | CCC | AAA | GGACT | TGGCCG | TGCCTCA | GAC-CCAC | CTAGA | GG | AGCCTGTT | -CT |
| Alaf | -AGCTT  | -AAAA | CCC | AAA | GGACT | TGGCCG | TGCCTCA | AAC-CCAT | CTAGA | GG | AGCCTGTT | -CT |
| Nock | -AGCTT  | -AAAA | CCC | AAA | GGACT | TGGCCG | TGCCTCA | AAC-CCAT | CTAGA | GG | AGCCTGTT | -CT |
| Anja | -AGCTT  | -AAAA | CCC | AAA | GGACT | TGGCCG | TGCCTCA | AAC-CCAC | CTAGA | GG | AGCCTGTT | -CT |
| Gyki | -AGCTT  | -AAAA | CCC | AAG | GGACT | TGGCCG | TGCCTCA | AAC-CCAC | CTAGA | GG | AGCCTGTC | -CT |
| Syka | -AGCTT  | -AAAA | CCC | AAA | GGACT | TGGCCG | TGCCTTA | AAC-CCAC | CTAGA | GG | AGCCTGTT | -CT |
| Opma | -AGTTT  | -AAAA | CCC | AAA | GGACT | TGGCCG | TGCTTCA | AAA-CCCC | CTAGA | GG | AGCCTGTC | -CT |
| Comy | -AGCTT  | -AAAA | CCC | AAA | GGACT | TGGCCG | TGCCTCA | AAC-CCAC | CTAGA | GG | AGCCTGTT | -CT |
| Sasp | -AGCTT  | -AAAA | CCC | AAA | GGACT | TGGCCG | TATCTCA | GAC-CCAC | CTAGA | GG | AGCCTGTC | -CT |
| Eupe | TAGCTT  | -AAAA | CCC | AAA | GGACT | TGGCCG | CACCTCA | AAC-CCAC | CTAGA | GG | AGCCTGTC | -CT |
| Enja | -AGCTT  | -AAAA | CCC | AAA | GGACT | TGGCCG | TGCCTCA | GAC-CCCC | CTAGA | GG | AGCCTGTT | -CT |
| Same | -AGCTT  | -AAAA | CCC | AAA | GGACT | TGGCCG | TGCTTCA | GAC-CCCC | CTAGA | GG | AGCCTGTT | -CT |
| Chch | -AGCTT  | -AAAA | CCC | AAA | GGACT | TGGCCG | CACCTCA | GAC-CCAC | CTAGA | GG | AGCCTGTT | -CT |
| Grgr | TAGCTT  | -GAAA | CCC | AAA | GGACT | TGGCCG | CGCCTCA | GAC-CCAC | CTAGA | GG | AGCCTGTT | -CT |
| Caau | -AGCTT  | -AAAA | CCC | AAA | GGACC | TGACC  | TGTCTCA | GAT-CCCC | CTAGA | GG | AGCCTGTT | -CT |
| Cyca | -AGCTT  | -AAAA | CCC | AAA | GGACC | TGACC  | TGTCTCA | GAC-CCCC | CTAGA | GG | AGCCTGTT | -CT |
| Dare | AAAGCTT | -AAAA | CCC | AAA | GGACC | TGACC  | TGCCTTA | GAT-CCCC | CTAGA | GG | AGCCTGTT | -CT |
| Cost | -AGCTT  | -AAAA | CCC | AAA | GGACT | TGGCCG | TGCCTTA | GAC-CCCC | CTAGA | GG | AGCCTGTT | -CT |
| Leec | -AGCTT  | -AAAA | CCC | AAA | GGACT | TGGCCG | TGCCTTA | GAC-CCCC | CTAGA | GG | AGCCTGTT | -CT |
| CrIa | -AGCTT  | -AAAA | CCC | AAA | GGACT | TGGCCG | TGCCTTA | GAC-CCCC | CTAGA | GG | AGCCTGTT | -CT |
| Clmc | -AGCTT  | -AAAA | CCC | AAA | GGACT | TGACC  | TGTCTCA | GAC-CCAC | CTAGA | GG | AGCCTGTT | -CT |
| Phin | -AGCTT  | -AAAA | CCC | AAA | GGACT | TGACC  | TGTCTCA | CCT-CCAC | CTAGA | GG | AGCCTGTT | -CT |
| Icpu | -AGCTT  | -AAAA | CCC | AAA | GGACT | TGGCCG | TGTCTCA | GAC-CCAC | CTAGA | GG | AGCCTGTT | -CT |
| Psto | -AGCTT  | -AAAA | CCC | AAA | GGACT | TGGCCG | TGTCTCA | GAC-CCAC | CTAGA | GG | AGCCTGTT | -CT |
| Cora | -AGCTT  | -AAAA | CCC | AAA | GGACT | TGGCCG | TGTCTCA | GAC-CCAC | CTAGA | GG | AGCCTGTT | -CT |
| Eisp | -AGCTT  | -AAAA | CTC | AAA | GGACT | TGGCCG | TGCTCCA | GAC-CCCC | CTAGA | GG | AGCCTGTT | -CT |
| Apal | -AGCTT  | -AAAA | CTC | AAA | GGACT | TGGCCG | CGTCTCC | -AC-CCGA | CTAGA | GG | AGCCTGTT | -CT |
| EsLu | -AGCTT  | -AAAA | CCC | AAA | GGACT | TGGCCG | TGCTTCA | GAC-CCAC | CTAGA | GG | AGCCTGTT | -CT |
| Dape | -AGCTT  | -AAAA | CCC | AAA | GGACT | TGGCCG | TGCCTCA | GAC-CCAC | CTAGA | GG | AGCCTGTT | -CT |
| Glse | -AGCTT  | -AAAA | CCC | AAA | GGACT | TGGCCG | TGCCCCA | GAC-CCAC | CTAGA | GG | AGCCTGTT | -CT |
| Naar | -AGCTT  | -AAAA | CCC | AAA | GGACT | TGGCCG | TGCCCCA | GAC-CCAC | CTAGA | GG | AGCCTGTT | -CT |
| Baoc | -AGCTT  | -AAAA | CCC | AAA | GGACT | TGGCCG | TGCCCCA | GAC-CCAC | CTAGA | GG | AGCCTGTT | -CT |
| Opso | -AGCTT  | -AAAA | CCC | AAA | GGACT | TGGCCG | TGCCCCA | GAC-CCAC | CTAGA | GG | AGCCTGTT | -CT |
| Alte | -AGCTT  | -AAAA | CCC | AAA | GGACT | TGGCCG | TGCCTCA | GAC-CCAC | CTAGA | GG | AGCCTGTT | -CT |
| Plap | -AGCTT  | -AAAA | CCC | AAA | GGACT | TGGCCG | TGCCTCA | GAC-CCAC | CTAGA | GG | AGCCTGTT | -CT |

Plal -AGCTT-AAAACCCAGGACTTGGCCGTGCCTCATAC-CCACCTAGAGGAGCCTGTT-CT  
 Sami TAGCTT-AAAACCCAGGACTTGGCCGTGCCTCATAC-CCACCTAGAGGAGCCTGTT-CT  
 Rere -AGCTT-AAAACCCAGGACTTGGCCGTGCCTCAC-CCACCTAGAGGAGCCTGTT-CT  
 Gama -AGCTT-AAAACCCAGGACTTGGCCGTGCCTCAGAC-CCACCTAGAGGAGCCTGTT-CT  
 Onmy -AGCTT-AAAACCCAGGACTTGGCCGTGCCTCAGAC-CCACCTAGAGGAGCCTGTT-CT  
 Sasa -AGCTT-AAAACCCAGGACTTGGCCGTGCCTCAGAC-CCACCTAGAGGAGCCTGTT-CT  
 Cola -AGCTT-AAAACCCAGGACTTGGCCGTGCCTCAGAC-CCACCTAGAGGAGCCTGTT-CT  
 Dita -AGCTT-AAAACCCAGGACTTGGCCGTGCCTTAC-CCACCTAGAGGAGCCTGTT-CT  
 Sigr -AGCTT-AAAACCCAGGATTGGCCGCACCTTCAAC-CCATCTAGAGGAGCCTGTT-CT  
 Chsl -AGCTT-AAAACTCAAGGACTTGGCCGTACCTCAAC-CCCCCTAGAGGAGCCTGTT-CT  
 Atja -AGCTT-AAAACCCAGGACTTGGCCGTGCTTCAAC-CCACCTAGAGGAGCCTGTT-CT  
 lido -AGCTT-AAAACCCAGGACTTGGCCGTGCTTCAAC-CCACCTAGAGGAGCCTGTT-CT  
 Auja -AGCTT-AAAACCCAGGACTTGGCCGTGCTTCAAC-CCCCCTAGAGGAGCCTGTT-CT  
 Chag -AGCTT-AAAACCCAGGACTTGGCCGTGTTTTAGAT-CCACCTAGAGGAGCCTGTT-CT  
 Hami -AGCTT-AAAACCCAGGACTTGGCCGTGCTTCAAC-CCCCCTAGAGGAGCCTGTC-CT  
 Saun -AGCTT-AAAACCCAGGACTTGGCCGTGCTTCAAC-CCCCCTAGAGGAGCCTGTC-CT  
 Nema -AGCTT-AAAACCCAGGACTTGGCCGTGCTTTAGAC-CCACCTAGAGGAGCCTGTT-CT  
 Disp -ATCTT-AAAACCCAGGACTTGGCCGTGCTTTAGAC-CCACCTAGAGGAGCCTGTC-CT  
 Myaf -AGCTT-CAAACCCAGGACTTGGCCGTGCTTTAGAC-CCACCTAGAGGAGCCTGTC-CT  
 Lagu -AGCTT-AAAACCCAGGACTTGGCCGTACCTTAGAC-CCCCCTAGAGGAGCCTGTT-CT  
 Trtr -AGCTT-AAAACCCAGGACTTGGCCGTGCCTCAGAC-CCCCCTAGAGGAGCCTGTT-CT  
 Zucr -AGCTT-GAAACCCAGGACTTGGCCGTGCCTCAGAC-CCCCCTAGAGGAGCCTGTT-CT  
 Pxja -AGCTT-AAAACCCAGGACTTGGCCGTGCTTTAGAC-CCCCCTAGAGGAGCCTGTC-CT  
 Pxlo -AGCTT-AAAACCCAGGACTTGGCCGTGCTTTAGAC-CCCCCTAGAGGAGCCTGTC-CT  
 Pctr -AGCTT-AAAACCCAGGACTTGGCCGTGCTTTAGAC-CCCCCTAGAGGAGCCTGTT-CT  
 Apsa -AGCTT-AAAACCCAGGACTTGGCCGTGCTTTATAC-CCCCCTAGAGGAGCCTGTT-CT  
 Cabe CAGCTT-AAAACCCAGGACTTGGCCGCGCTTTAGAC-CCACCTAGAGGAGCCTGTT-CT  
 Bzze CAGCTT-AAAACCCAGGACTTGGCCGTGCTTTAGAC-CCACCTAGAGGAGCCTGTT-CT  
 Siim -AGCTT-GAAACCCAGGACTTGGCCGTGCTTCAAC-CCACCTAGAGGAGCCTGTT-CT  
 Ctru -AGCTT-AAAACCCAGGACTTGGCCGTGCTTTAGAC-CCCCCTAGAGGAGCCTGTT-CT  
 Dpbr -AGCTT-AAAACCCAGGACTTGGCCGTGCTTTAGAC-CCCCCTAGAGGAGCCTGTT-CT  
 Caki -AGCTT-AAAACCCAGGACC TGGCCGTGCTTTAGAT-CCCCCTAGAGGAGCCTGTT-CT  
 Phja AAAGCTT-AAAACCCAGGACTTGACCGTCTTTAG-T-CCCCCTAGAGGAGCCTGTT-CT  
 Brne -AGCCT-AAAACTAAAGGACC TGGCCGTGCTTTACAT-CCATCTAGAGGAGCCTGTC-CT  
 Gamo -AGCTT-AAAACCCAGGACTTGGCCGTGCTTTAGAC-CCCCCTAGAGGAGCCTGTT-CT  
 Lolo -AGCTT-AAAACCCAGGACTTGGCCGTGCTTTAGAC-CCCCCTAGAGGAGCCTGTT-CT  
 Batr -AGCTT-AAAATCCAAAGACTTGGCCGCACCTTCAA-CC-CTAGAGGAGCCTGTT-TC  
 Prmy -CGCTT-AAAAACCAAGACC TGGCCGTGCTTTA-T-CCCCCTAGAGGAGCCTGTT-TC  
 Loli -AGCTT-AAAATCCAAAGACTTGGCCGTGCTTTAGAC-CCACCTAGAGGAGCCTGTT-CT  
 Loam TAGCTT-AAAACCCAGGACTTGGCCGTGCTTTAGAC-CCACCTAGAGGAGCCTGTT-CT  
 Chab -AGCTT-GAAACCCAGGACTTGGCCGTGCTTAAAT-CCACCTAGAGGAGCCTGTT-CT  
 Chto -AGCTT-GAAACCCAGGACTTGGCCGTGCTTAAAT-CCACCTAGAGGAGCCTGTT-CT  
 Majo -AGCTT-AAAACCCAGGACTTGGCCGTGCTTTAGAC-CCCCCTAGAGGAGCCTGTT-CT  
 Hlst -TGCTT-AAAACCCAGGACTTGACCGTCTTTAGAC-CCACCTAGAGGAGCCTGTT-CT  
 Clpe -AGCTT-AAAACCCAGGACTTGGCCGACGCTTAAAC-CCACCTAGAGGAGCCTGTT-CT  
 Mlmr -AGATT-GAAACCCAGGACTTGGCCGTGCTTTAGA-CCCCCTAGAGGAGCCTGTT-CT  
 Crcr -AGCTT-AAAACCCAGGACTTGGCCGTGCTTAAAT-CCACCTAGAGGAGCCTGTT-CT  
 Muce CAGCTT-AAAACCCAGGACTTGGCCGTGCTTAAAT-CCACCTAGAGGAGCCTGTT-CT  
 Bege -AGCTT-AAAACCCAGGACTTGGCCGTGCTTTAGAT-CCACCTAGAGGAGCCTGTT-CT  
 Mela -AGCTT-AAAACCCAGGACTTGGCCGTGCTTTAGAT-CCCCCTAGAGGAGCCTGTT-CT  
 Hats -AGCTT-AAAACCCAGGACTTGGCCGTGCTTTAGAC-CCACCTAGAGGAGCCTGTT-CT  
 Orla -AGCTT-AAAACCCAGGACTTGGCCGTGCTTTAGAC-CCACCTAGAGGAGCCTGTT-CT

Cosa -AGCTT-AAAA**TCCAAA**GGACT**TGGCCG**TGCTTTA GAC-CCAC**CTAGA**GG**AGCCTGTT**-**CT**  
 Exvo -AGCTT-AAAA**CCCAAA**GGACT**TGGCCG**TGCTTCA AAC-CCAC**CTAGA**GG**AGCCTGTT**-**CT**  
 Depa -AGCTT-AAAA**TCCAAA**GGACT**TGGCCG**TGCTTTA GAT-CCAC**CTAGA**GG**AGCCTGTT**-**CT**  
 Rima -AGCTC-AAAA**CTCAAA**GGACT**TGGCCG**CGCTTTA AAC-CCAT**CTAGA**GG**AGCCTGTC**-**CT**  
 Fuol -AGCTT-AAAA**CCCAAA**GGACT**TGGCCG**TGCTTTA GAT-CCAC**CTAGA**GG**AGCCTGTT**-**CT**  
 Gmaf -AGCTT-AAAA**CCCAAA**GGACT**TGGCCG**TGCTTTA GAC-CCCC**CTAGA**GG**AGCCTGTT**-**CT**  
 Xeei -AGCTT-AAAA**CCCAAA**GGACT**TGGCCG**TGCTTTA GAC-CCCC**CTAGA**GG**AGCCTGTT**-**CT**  
 Pros -AGCTT-AAAA**CCCAAA**GGACT**TGGCCG**TGCTTTA GAC-CCAC**CTAGA**GG**AGCCTGTC**-**CT**  
 Scmi -AGCTT-AAAA**CCCAAA**GGACT**TGGCCG**TGCTTCA - -C-CCAC**CTAGA**GG**AGCCTGTC**-**CC**  
 Rolo -AGCTT-AAAA**CCCAAA**GGACT**TGGCCG**TGCTTTA GAC-CCAC**CTAGA**GG**AGCCTGTT**-**CT**  
 Cere CA**AGCTT**-AAAA**CCCAAA**GGACT**TGGCCG**TGCTTTA AAC-CCAT**CTAGA**GG**AGCCTGTT**-**CT**  
 Daga -AGCTT-AAAA**CCCAAA**GGACT**TGGCCG**TGCTTTA -AC-CCCC**CTAGA**GG**AGCCTGTT**-**CT**  
 Anco CA**AGCTT**-AAAA**CCCAAA**GGACT**TGGCCG**TGCTTTA GAC-CCAC**CTAGA**GG**AGCCTGTT**-**CT**  
 Dmve -AGCTT-AAAA**CCCAAA**GGACT**TGGCCG**TGCTTCA TAC-CCAC**CTAGA**GG**AGCCTGTT**-**CT**  
 Dmar -AGCTT-AAAA**CCCAAA**GGACT**TGGCCG**TGCTTCA CAC-CCAC**CTAGA**GG**AGCCTGTT**-**CT**  
 Anka -AGCTT-AAAA**CCCAAA**GGACT**TGGCCG**TGCTTTA GAC-CCAC**CTAGA**GG**AGCCTGTT**-**CT**  
 Moja -AGCTT-AAAA**CCCAAA**GGACT**TGGCCG**TGCTTTA GAC-CCAC**CTAGA**GG**AGCCTGTT**-**CT**  
 Hoja CA**AGCTT**-AAAA**CCCAAA**GGACT**TGGCCG**TGCTTTA GAC-CCAC**CTAGA**GG**AGCCTGTT**-**CT**  
 Bede -AGCTT-AAAA**CCCAAA**GGACT**TGGCCG**TGCTTTA GAC-CCAC**CTAGA**GG**AGCCTGTC**-**CT**  
 Bsp -AGCTT-AAAA**CCCAAA**GGACT**TGGCCG**TGCTTTA GAC-CCAC**CTAGA**GG**AGCCTGTC**-**CT**  
 Mysp -AGCTT-AAAA**CCCAAA**GGACT**TGGCCG**TGCTTTA GAC-CCAC**CTAGA**GG**AGCCTGTT**-**CT**  
 Osja -AGCTT-AAAA**CCCAAA**GGACT**TGGCCG**TGCTTTA GAT-CCAC**CTAGA**GG**AGCCTGTT**-**CT**  
 Sgro -AGCTT-AAAA**CCCAAA**GGACT**TGGCCG**TGCTTTA GAT-CCAC**CTAGA**GG**AGCCTGTT**-**CT**  
 Pzpa -AGCTT-TAAA**CCCAAA**GGACT**TGGCCG**TGCTTTA GAC-CCCC**CTAGA**GG**AGCCTGTT**-**CT**  
 Zeja -AGCTT-AAAA**CCCAAA**GGACT**TGGCCG**TGCTTTA GAC-CCCC**CTAGA**GG**AGCCTGTT**-**CT**  
 Znne -AGCTT-AAAA**CCCAAA**GGACT**TGGCCG**TGCTTTA GAC-CCCC**CTAGA**GG**AGCCTGTT**-**CT**  
 Zefa -AGCTT-AAAA**CCCAAA**GGACT**TGGCCG**TGCTTTA GAC-CCCC**CTAGA**GG**AGCCTGTT**-**CT**  
 Acni -AGCTT-AAAA**CCCAAA**GGACT**TGGCCG**TGCTTTA GAC-CCCC**CTAGA**GG**AGCCTGTT**-**CT**  
 Ncrh -AGCTT-AAAA**CCCAAA**GGACT**TGGCCG**TGCTTTA GAC-CCCC**CTAGA**GG**AGCCTGTT**-**CT**  
 Agca -AGCTT-AAAA**CCCAAA**GGACT**TGGCCG**TGCTTTA GAC-CCCC**CTAGA**GG**AGCCTGTC**-**CT**  
 Hydy -AGCTT-AAAA**CCCAAA**GGACT**TGGCCG**TGCTTTA GAC-CCAC**CTAGA**GG**AGCCTGTT**-**CT**  
 Gsac -AGCTT-GAAA**CCCAAA**GGACT**TGGCCG**TGCTTTA GAT-CCAC**CTAGA**GG**AGCCTGTT**-**CT**  
 Pevo -AGCTT-AAAA**CCCAAA**GGACT**TGGCCG**TGCTTTA GAC-CCAC**CTAGA**GG**AGCCTGTT**-**CT**  
 Hiku -AGCTT-AAAA**CCCAAA**GGACT**TGGCCG**TGCTTTA CAC-CCAC**CTAGA**GG**AGCCTGTT**-**CT**  
 Inpa -AGCTT-TAAA**CCCAAA**GGACT**TGGCCG**TGCTTAA AAT-CCAA**CTAGA**GG**AGCCTGTT**-**CT**  
 Auch -AGCTT-AAAA**CCCAAA**GGACT**TGGCCG**TGCTTTA GAC-CCAA**CTAGA**GG**AGCCTGTT**-**CT**  
 Fico -AGCTT-AAAA**CCCAAA**GGACT**TGGCCG**TGCTTTA GAC-CCAC**CTAGA**GG**AGCCTGTT**-**CT**  
 Macs -AGCTT-GAAA**CCCAAA**GGACT**TGGCCG**TGCTTTA GAC-CCAC**CTAGA**GG**AGCCTGTT**-**CT**  
 Moal -AGCTT-AAAA**CCCAAA**GGACT**TGGCCG**TGCTTAA GAC-CCAC**CTAGA**GG**AGCCTGTT**-**CT**  
 Syma -AGCTT-AAAA**CCCAAA**GGACT**TGGCCG**TGCTTAA GAC-CCAT**CTAGA**GG**AGCCTGTC**-**CT**  
 Maf r -AGCTT-AAAA**CCCAAA**GGACT**TGGCCG**TGCTTTA AAT-CCAC**CTAGA**GG**AGCCTGTT**-**CT**  
 Dcpe -AGCTT-AAAA**CTCAAG**GGACT**TGGCCG**CGCTTTA TAA-CCAT**CTAGA**GG**AGCCTGTT**-**CT**  
 Dct i -AGCTT-AAAA**CTCAAG**GGACT**TGGCCG**CGCTTTA TAA-CCAT**CTAGA**GG**AGCCTGTT**-**CT**  
 Hehi -AGCTT-AAAA**CCCAAA**GGACT**TGGCCG**TGCTTTA GAC-CCCC**CTAGA**GG**AGCCTGTT**-**CT**  
 Stam CA**AGCTT**-GAAA**CCCAAA**GGACT**TGGCCG**TGCTTTA GAT-CCAC**CTAGA**GG**AGCCTGTT**-**CT**  
 Hogi -AGCTT-AAAA**CCCAAA**GGACT**TGGCCG**TGCTTTA GAC-CCCC**CTAGA**GG**AGCCTGTT**-**CT**  
 Erzo -AGCTT-GAAA**CCCAAA**GGACT**TGGCCG**TGCTTTA GAT-CCAC**CTAGA**GG**AGCCTGTT**-**CT**  
 Hxot -AGCTT-AAAA**CCCAAA**GGACT**TGGCCG**TGCTTTA GAT-CCAC**CTAGA**GG**AGCCTGTT**-**CT**  
 Core -AGCTT-AAAA**CCCAAA**GGACT**TGGCCG**TGCTTTA GAT-CCAC**CTAGA**GG**AGCCTGTT**-**CT**  
 Apve -AGCTT-GAAA**CCCAAA**GGACT**TGGCCG**TGCTTTA GAC-CCAC**CTAGA**GG**AGCCTGTT**-**CT**  
 Lat j -AGCTT-GAAA**CCCAAA**GGACT**TGGCCG**TGCTTAA TAT-CCAC**CTAGA**GG**AGCCTGTT**-**CT**  
 Laja -AGCTT-GAAA**CCCAAA**GGACT**TGGCCG**TGCTTTA GAT-CCAC**CTAGA**GG**AGCCTGTT**-**CT**



Syja -AGCTT-AAAACCCAGGACTTGGCGTGCTTTA GAT-CCACCTAGAGGAGCCTGTT-CT  
 Epme -AGCTT-AAAACCCAGGACTTGGCGTGCTTTA GAC-CCACCTAGAGGAGCCTGTT-CT  
 Grse -AGCTT-AAAACCCAGGACTTGGCGTGCTTTA GAT-CCACCTAGAGGAGCCTGTT-CT  
 Clja -AGCTT-AAAATCCAGGACTTGGCGTGCTTCA GAT-CCACCTAGAGGAGCCTGTC-CT  
 Ogcy -AGCTT-AAAACCCAGGACTTGGCGTGCTTAA GAT-CCATCTAGAGGAGCCTGTT-CT  
 Plna -AGCTT-AAAACCCAGGACTTGGCGTGCTTTA GAC-CCACCTAGAGGAGCCTGTC-CT  
 Lema -AGCTT-AAAACCCAGGACTTGGCGTGCTTTA GAC-CCACCTAGAGGAGCCTGTT-CT  
 Etzo -AGCTT-GAAACCCAGGACTTGGCGTGCTTTA GAT-CCACCTAGAGGAGCCTGTT-CT  
 Apse -AGCTT-GAAACCCAGGACTTGGCGCGCTTCA CAC-CCACCTAGAGGAGCCTGTT-CT  
 Epde -AGCTT-GAAACCCAGGACTTGGCGTGCTTTA GAT-CCACCTAGAGGAGCCTGTT-CT  
 Slja -AGCTT-GAAA TCCAGGACTTGGCGTGCTTTA GAT-CCACCTAGAGGAGCCTGTC-CT  
 Bsja CAAGCTT-AAAACCCAGGACTTGGCGTGCTTCA GAT-CCCCCTAGAGGAGCCTGTT-CT  
 Ecna -AGTTT-AAAACCCAGGACTTGGCGTGCTTTA CAT-CCACCTAGAGGAGCCTGTT-CT  
 Cohi -AGTTT-AAAACCCAGGACTTGGCGTGCTTAA TAT-CCACCTAGAGGAGCCTGTC-CT  
 Caar -AGTTT-AAAACCCAGGACTTGGCGTGCTTAA CAT-CCACCTAGAGGAGCCTGTT-CT  
 Came -AGTTT-AAAACCCAGGACTTGGCGTGCTTAA CAT-CCACCTAGAGGAGCCTGTT-CT  
 Mema -AGTTT-AAAACCCAGGACTTGGCGTGCTTTA CAT-CCACCTAGAGGAGCCTGTT-CT  
 Lenu -AGCTT-AAAACCCAGGACTTGGCGTGCTTCA AAC-CCACCTAGAGGAGCCTGTT-CT  
 Plma -AGCTT-GAAACCCAGGACTTGGCGTACTTTA GAT-CCCCCTAGAGGAGCCTGTT-CT  
 Emst -AGCTT-GAAACCCAGGACTTGGCGTGCTTTA GAT-CCACCTAGAGGAGCCTGTT-CT  
 Ptti -AGCTT-AAAACCCAGGACTTGGCGTGCTTTA GAT-CCACCTAGAGGAGCCTGTT-CT  
 Losu -AGCTT-AAAACTCAGGACTTGGCGTGCTTTA GAT-CCACCTAGAGGAGCCTGTC-CT  
 Geoy -AGCTT-AAAACCCAGGACTTGGCGTGCTTTA GAC-CCATCTAGAGGAGCCTGTT-CT  
 Dipi -AGCTT-AAAACCCAGGACTTGGCGTGCTTTA GAT-CCACCTAGAGGAGCCTGTT-CT  
 Pama -AGCTT-AAAACCCAGGACTTGGCGTGCTTTA GAC-CCACCTAGAGGAGCCTGTT-CT  
 Leob -AGCTT-AAAACCCAGGACTTGGCGTGCTTTA GAC-CCCCCTAGAGGAGCCTGTT-CT  
 Neba AAAGCTT-AAAAACCAGGACTTGGCGTGCTTCA AAC-CCCCCTAGAGGAGCCTGTT-CT  
 Pdpi -AGTTT-AAAACCCAGGACTTGGCGTGCTTTA TAT-CCCCCTAGAGGAGCCTGTT-CT  
 Nimi -AGCTT-AAAACCCAGGACTTGGCGTGCTTTA GAC-CCACCTAGAGGAGCCTGTT-CT  
 Uptr -AGCTT-AAAACCCAGGACTTGGCGTGCTTTA GAC-CCCCCTAGAGGAGCCTGTT-CT  
 Pesc -AGCTT-AAAACCCAGGACTTGGCGTGCTTCA AAC-CCCCCTAGAGGAGCCTGTT-CT  
 Baar -TGCTT-AAAACCCAGGACTTGGCGTGCTTTA GAC-CCCCCTAGAGGAGCCTGTC-CT  
 Moar -AGCTT-AAAACCCAGGACTTGGCGTGCTTTA GAT-CCACCTAGAGGAGCCTGTT-CT  
 Toja -AGTTT-AAAACCCAGGACTTGGCGTGCTTAA CAT-CCACCTAGAGGAGCCTGTC-CT  
 Chau -AGCTT-AAAACCCAGGACTTGGCGTGCTTTA GAC-CCACCTAGAGGAGCCTGTT-CT  
 Chse -AGCTT-AAAACCCAGGACTTGGCGTGCTTCA AAC-CCACCTAGAGGAGCCTGTT-CT  
 Enar -AGCTT-AAAACCCAGGACTTGGCGTGCTTTA GAT-CCACCTAGAGGAGCCTGTT-CT  
 Hpty -AGCTT-GAAACCCAGGACTTGGCGTGCTTTA GAT-CCACCTAGAGGAGCCTGTT-CT  
 Nana -AGCTT-AAAACCCAGGACTTGGCGTGCTTAA GAT-CCACCTAGAGGAGCCTGTT-CT  
 Mcst -AGCTT-AAAACCCAGGACTTGGCGTGCTTTA GAT-CCACCTAGAGGAGCCTGTT-CT  
 Rhox -AGCTT-AAAACCCAGGACTTGGCGTGCTTTA GAT-CCACCTAGAGGAGCCTGTT-CT  
 Opfa TAGCTT-AAAACCCAGGACTTGGCGTGCTTTA GAT-CCACCTAGAGGAGCCTGTT-CT  
 Paar -AGCTT-CAAA CCCAGGACTTGGCGTGCTTCA GAT-CCCCCTAGAGGAGCCTGTT-CT  
 Gozo -AGCTT-AAAACCCAGGACTTGGCGTGCTTTA GAC-CCACCTAGAGGAGCCTGTT-CT  
 Ackr -AGCTT-AAAACCCAGGACTTGGCGTGCTTTA AAC-CCCCCTAGAGGAGCCTGTC-CT  
 Elev AAAGCTT-AAAACCCAGGACTTGGCGTGCTTTA GAT-CCACCTAGAGGAGCCTGTT-CT  
 Trdu TAGCTT-AAAACCCAGGACTTGGCGTGCTTTA GAT-CCACCTAGAGGAGCCTGTT-CT  
 Amoc -AGCTT-AAAACCCAGGACTTGGCGTGCTTCA CAT-CCGTCTAGAGGAGCCTGTT-CT  
 Hame -AGCTT-AAAACCCAGGACTTGGCGTGCTTTA GAT-CCACCTAGAGGAGCCTGTT-CT  
 Chso -AGCTT-AAAACCCAGGACTTGACCGTGCTTTA TAT-CCCCCTAGAGGAGCCTGTC-CT  
 Lyto -AGCTT-AAAACCCAGGACTTGGCGTGCTTTA AAC-CCACCTAGAGGAGCCTGTT-CT  
 Encr -AGCTT-AAAACCCAGGACTTGGCGTGCTTTA GAT-CCACCTAGAGGAGCCTGTT-CT

Bvar -AGCTT-AAAACCC AAA GGACT TGGCCG TGCTTTA CAT-CCTTCTAGAGG GACACGTC-CT  
 Noco -AGCTT-AAAACCC AAA GGACT TGGCCG TGCTTTA GAT-CCTA CTAGAGG AGCCTGTT-CT  
 Chsp -AGCTC-AAAACCC AAA GGACC TGGCCG TGCTTTA AAC-CCCTCTAGAGG AGCCTGTC-CT  
 Arja -AGCTT-AAAACCC AAA GGACT TGGCCG TGCTTTA GAT-CCAC CTAGAGG AGCCTGTT-CT  
 Pase -AGCTT-AAAACCC AAA GGACT TGGCCG TGCTTTA TAC-CCCTCTAGAGG AGCCTGTC-CA  
 Trel -AGCTT-GAAA CCC AAA GGACT TGGCCG TGCTTTA GAC-CCAC CTAGAGG AGCCTGTC-CT  
 Lifa -AGCTT-GAAA CCC AAA GGACT TGGCCG TGCTTTA GAC-CCCC CTAGAGG AGCCTGTT-CT  
 Acur -AGCTT-AAAA CCC AAA GGATT TGGCCG TGCTTTA TAC-CCCC CTAGAGG AGCCTGTC-CT  
 Ampe -AGCTT-GAAA CCC AAA GGACT TGGCCG TGCTTTA GAT-CCAC CTAGAGG AGCCTGTT-CT  
 Urja -AGCTT-AAAA CCC AAA GGACT TGGCCG TGCTTTA GAT-CCAC CTAGAGG AGCCTGTC-CT  
 Enet -AGCTT-AGAA CCC AAA GGACT TGGCCG TGCTTAA GAC-CCCC CTAGAGG AGCCTGTT-CT  
 Ptbr -AGCTT-AAAA CCC AAA GGACT TGGCCG TGCTTAA TAA-CCCC CTAGAGG AGCCTGTT-CT  
 Safa -AGCTC-AAAA CCC AAA GGACT TGGCCG TGCTTAA CAT-CCCC CTAGAGG AGCCTGTT-CT  
 Icae -AGCTT-GAAA CCC AAA GGACT TGGCCG TACTTTA GAT-CCCC CTAGAGG AGCCTGTT-CT  
 Asmi -AGCTT-GAAA CCC AAA GGACT TGGCCG TGCTTTA GAC-CCAC CTAGAGG AGCCTGTT-CT  
 Foal -AGCTT-AAAA CCC AAA GGACT TGGCCG TGCTTTA AAC-CCCC CTAGAGG AGCCTGTT-CT  
 Drze -AGTTT-AAAA CCC AAA GGACT TGGCCG TGCTTTA GAC-CCCC CTAGAGG AGCCTGTT-CT  
 Rhas -AGCTT-AAAA CCC AAA GGACT TGGCCG TGCTTTA GAT-CCAC CTAGAGG AGCCTGTT-CT  
 Elac -AGCTT-AAAA CCC AAA GGACT TGGCCG TGCTTTA GAC-CCCC CTAGAGG AGCCTGTT-CT  
 Kugu AAAGCTT-AAAA CCC AAA GGACT TGGCCG TGCTTTA GTC-CCAC CTAGAGG AGCCTGTT-CT  
 Plor -AGCTT-AAAA CCC AAA GGACT TGGCCG TGCTTTA GAT-CCAC CTAGAGG AGCCTGTT-CT  
 Sgun CAAGCTT-AAAA CCC AAA GGACT TGGCCG TGCTTTA GAT-CCAC CTAGAGG AGCCTGTT-CT  
 Zaco -AGCTT-AAAA CCC AAA GGACT TGGCCG TGCTTTA GAT-CCAC CTAGAGG AGCCTGTT-CT  
 Zbfl -AGCTT-AAAA CCC AAA GGACT TGGCCG TGCTTTA GAC-CCAC CTAGAGG AGCCTGTT-CT  
 Spba -AGTCT-GAAA CCC AAA GGACT TGGCCG TGCTTTA CAT-CCAC CTAGAGG AGCCTGTC-CT  
 Game -AGCTT-GAAA CCC AAA GGACT TGGCCG TACTTTA GAT-CCCC CTAGAGG AGCCTGTT-CT  
 Thth -AGCTT-GAAA CCC AAA GGACT TGGCCG TACTTTA GAT-CCCC CTAGAGG AGCCTGTT-CT  
 Xigl -AGTTT-AAAA CCC AAA GGACT TGGCCG TGCTTAA CAT-CCAC CTAGAGG AGCCTGTT-CT  
 Hyja -AGCCT-AAAA CCC AAA GGACT TGGCCG TTCTTTA GAT-CCCC CTAGAGG AGCCTGTT-CT  
 Psan -AGCCT-AAAA CCC AAA GGACT TGGCCG TTCTTTA GAC-CCAC CTAGAGG AGCCTGTT-CT  
 Cupa -AGCTT-AAAA CCC AAA GGACT TGGCCG TACTTTA GAT-CCCC CTAGAGG AGCCTGTT-CT  
 Mpch -AGCTT-AAAA CCC AAA GGACT TGGCCG TGCTTAA GAT-CCAC CTAGAGG AGCCTGTT-CT  
 Char -AGCTT-AAAA CCC AAA GGACT TGGCCG TGCTTAA GAT-CCAC CTAGAGG AGCCTGTT-CT  
 Pser -AGTTC-AAAA CCC AAA GGACT TGGCCG TGCTTTA CAT-CCAC CTAGAGG AGCCTGTT-CT  
 Prol -AGTTT-AAAA CCC AAA GGACT TGGCCG TGCTTAA CAT-CCAC CTAGAGG AGCCTGTT-CT  
 Plbi -AGTTT-AAAA CCC AAA GGACT TGGCCG TGCTTAA CAT-CCAC CTAGAGG AGCCTGTT-CT  
 Calu -AGTCT-GAAA CCC AAA GGACC TGGCCG TGCTTCA CAT-CCAT CTAGAGG AGCCTGTC-CT  
 Papa AAAGTTT-AAAA CCC AAA GGACT TGGCCG TGCTTAC AAT-CCAC CTAGAGG AGCCTGTT-AT  
 Sufr -AGCTT-AAAA CCC AAA GGACT TGGCCG TGCTTTA GAT-CCAC CTAGAGG AGCCTGTT-CT  
 Stci -AGCTT-AAAA CCC AAA GGACT TGGCCG TGCTTTA GAT-CCCC CTAGAGG AGCCTGTT-CT  
 Taru -AGCTT-AAAA CCC AAA GGACT TGGCCG TGCTTTA AAA-CCAT CTAGAGG AGCCTGTT-TT  
 Rala -AGCTT-AAAA CCC AAA GGACT TGGCCG TGCTTTA GAT-CCAC CTAGAGG AGCCTGTT-CT  
 \*\* \*\* \* \*\* \*\* \*\* \* \* \*\* \* \*\*

|      | 33 | 33'   | 34        | HVR | 35         |          |           |        |         |             |
|------|----|-------|-----------|-----|------------|----------|-----------|--------|---------|-------------|
| Scca | AT | AAACC | GATAATCCC | CG  | TTAAACCTCA | CCACTTC  | TTGCCA    | ---    | TTACC   | GTCTATAT    |
| Muma | AT | GACC  | GATAATCCC | CG  | TTCAACCTCA | CCACTTC  | TTGCCAT   | ---    | TACC    | GTCTATAT    |
| Erca | AT | AATC  | GATAATCCT | CG  | TTAAACCTCA | CCACATC  | TTGC      | -----  | ATTCA   | GCCTATAT    |
| Pose | AT | AATC  | GATAATCCT | CG  | TTCAACCTCA | CCACATC  | TTGC      | -----  | ATCCA   | GCCTATAT    |
| Actr | AG | AAACC | GATAATCCC | CG  | TTAAACCTCA | CCACTTC  | TTGT      | --C-A- | TTTCC   | GCCTATAT    |
| Scal | AG | AAACC | GATAATCCC | CG  | TTAACCTCA  | CCACTTC  | TTGT      | ---    | CATTTCC | GCCTATAT    |
| Posp | AG | AAACC | GATAATCCC | CG  | TTAAACCTCA | CCACTTC  | TTGT      | -CATTT | ---     | CCGCCTATAT  |
| Atsp | AG | ACCC  | GATACTCCC | CG  | TTAAACCTCA | CCACTTC  | TTGTCA    | ---    | ATCCC   | GCCTATAT    |
| Leoc | AG | AAACC | GATATTCCC | CG  | TTAAACCTCA | CCACTTC  | TTGTC     | ---    | AAT-CCC | GCCTATAT    |
| Amca | AG | AAACC | GATAATCCT | CG  | TTAAACCTCA | CCACTCC  | TTGTTAA   | -T---  | CCC     | GCCTATAT    |
| Osbi | AT | AACT  | GAAACTACC | CG  | TTAAACCTCA | CCGTTTC  | TAGCCAT   | --C--- | A       | GTCTATAT    |
| Pabu | AT | AACT  | GACACCCC  | CG  | TTAAACCTCA | CCACTCC  | TAGCCA    | ---    | ACCCA   | GTCTATAT    |
| Hial | AG | AACT  | GATAACCCC | CG  | TTAAACCTCA | CCACCCC  | TTGCC     | ---    | AACCCC  | GTCTATAT    |
| Elha | AG | AAACC | GATAACCCC | CG  | TTAAACCTCA | CCACCCC  | TTGT      | ---    | CAACCCC | GCCTATAT    |
| Mlcy | AT | AAACC | GATAACCCC | CG  | TTAAACCTCA | CCGTTTC  | TAGCC     | ---    | AACCCC  | GCCTATAT    |
| Algl | AT | AAACC | GATGATCCT | CG  | TTAAACCTCA | CCATCCC  | TTGTA     | ---    | AACCCA  | GCCTATAT    |
| Ptgi | AT | AAACC | GATAATCCC | CG  | TTAGACCTCA | CCACCCC  | TTGT      | ---    | CAACCCC | GCCTATAT    |
| Alaf | AC | AACT  | GATAATCCT | CG  | TTAAACCTCA | CCACCCC  | TTGTTAA   | -C---  | CCC     | GCCTATAT    |
| Nock | AT | AACT  | GATAATCCT | CG  | TTAAACCTCA | CCACTTC  | TTGTTAA   | -TT--- | CC      | GCCTATAT    |
| Anja | AT | AAACC | GATAACCCC | CG  | TTAAACCTCA | CCATCTC  | TTGC      | -CTAAA | ---     | CCGCCTATAT  |
| Gyki | AT | AAACC | GATGATCCC | CG  | TTAAACCTCA | CCTCTCC  | TTGCCA    | --AT-  | ---     | CCGCCTATAT  |
| Syka | AT | AAACC | GATAATCCC | CG  | TTAAACCTCA | CCACCCC  | TTGTTA    | ---    | AATCCC  | GCCTATAT    |
| Opma | AT | AAACC | GATAATCCC | CG  | TTAAACCTCA | CCACTCC  | TTGCCAA   | -C---  | TCA     | GTCTATAT    |
| Comy | AT | AAACC | GATAACCCC | CG  | TTAAACCTCA | CCACTTC  | TAGTT     | ---    | TTA-CCA | ACCTATAT    |
| Sasp | AT | AATC  | GATACACC  | CG  | CTAAACCTCC | CCTTTTC  | TTGCT     | ---    | AAATCC  | GCCTATAT    |
| Eupe | AT | AATC  | GATAAACCC | CG  | CTAAACCTTG | CCTCCCC  | TTGCCAA   | -A-    | ---     | ACCGCCTATAT |
| Enja | AG | AAACC | GATAACCCC | CG  | TTCAACCTCA | CCACTCC  | TTGCC     | ---    | TTTCC   | GCCTATAT    |
| Same | AG | AAACC | GATAACCCC | CG  | TTCAACCTCA | CTACTCC  | TTGC      | ---    | TTTTCCC | GCCTATAT    |
| Chch | AG | AAACC | GATAATCCC | CG  | TTAAACCTCA | CCACTTC  | TTGTTAT   | -C---  | ACA     | GCCTATAT    |
| Grgr | AG | AAACC | GATAACCCC | CG  | TTAAACCTCA | CCACCC   | TTGTTCC   | -C-    | ---     | CCGTCTATAT  |
| Caau | AG | AAACC | GATAACCCC | CG  | TTCAACCTCA | CCACTCC  | TAGCCAA   | -C---  | CCA     | GCCTATAT    |
| Cyca | AG | AAACC | GATAACCCC | CG  | TTCAACCTCA | CCACTTC  | TAGC      | ---    | CACCCA  | GCCTATAT    |
| Dare | AG | AAACC | GATTATCCC | CG  | TTAAACCTCA | CCATTTTC | TAGC      | -AA-   | -A-ATCA | GCCTATAT    |
| Cost | AG | AAACC | GATAACCCC | CG  | TTAAACCTCA | CCACTTC  | TTGTT     | ---    | AAC-CCC | GCCTATAT    |
| Leec | AG | AAACC | GATAATCCC | CG  | TCAAACCTCA | CCACTTC  | TAGTCA    | ---    | TTCCC   | GCCTATAT    |
| CrIa | AG | AAACC | GATAACCCC | CG  | TTAAACCTCA | CCACTTC  | TAGTCAT   | -C---  | CCC     | GCCTATAT    |
| Clmc | AG | AAACC | GATAATCCC | CG  | TTAAACCTCA | CCACCCC  | TTGTTTT   | -C---  | CCC     | GCCTATAT    |
| Phin | AG | AAACC | GATATTCT  | CG  | TTAAACCTCA | CCATCCC  | TTGCC     | ---    | CCC-GCC | GCCTATAT    |
| Icpu | AT | AAACC | GATAACCCC | CG  | TTAAACCTCA | CCACTTC  | TTGTTTA   | ---    | TCCC    | GCCTATAT    |
| Psto | AG | AAACC | GATAACCCC | CG  | TTAAACCTCA | CCACTTC  | TTGTTTT   | ---    | CCCC    | GCCTATAT    |
| Cora | AG | AAACC | GATAACCCC | CG  | TTAAACCTCA | CCACTTC  | TTGTTA    | ---    | A-TCCC  | GCCTATAT    |
| Eisp | AG | AAACC | GATAACCCC | CG  | TTCAACCTCA | CCACCTC  | TTGTT     | ---    | ATACC   | GCCTATAT    |
| Apal | AG | AAACC | GATAACCCC | CG  | TTCAACCTCA | CCACCCC  | TTGTT     | ---    | TTCACA  | GCCTATAT    |
| EsLu | AT | AAACC | GATAACCCC | CG  | CTTAACCTCA | CCAGCCC  | TTGTT     | ---    | CACCCC  | GCCTATAT    |
| Dape | AT | AAACC | GATAACCCC | CG  | CTTAACCTCA | CCGCCCC  | TTGTTCC   | -T---  | CCC     | GCCTATAT    |
| Glse | AG | AAACC | GATACCCC  | CG  | TTCAACCTCA | CCACCCC  | TTGTTAA   | -C---  | CCC     | GCCTATAT    |
| Naar | AG | AAACC | GATACCCC  | CG  | TTCAACCTCA | CCACCTC  | TTGTTA    | --AC-  | ---     | CCGCCTATAT  |
| Baoc | AG | AAACC | GATACCCC  | CG  | TTCAACCTCA | CCACCTC  | TTGTCA    | ---    | ACCCC   | GCCTATAT    |
| Opso | AG | AAACC | GATACCCC  | CG  | TTCAACCTCA | CCACCTC  | TTGTTAATC | ---    | CC      | GCCTATAT    |
| Alte | AG | AAACC | GATAACCCC | CG  | TTAAACCTCA | CCACCCC  | TTGTTAA   | ---    | TCCC    | GCCTATAT    |
| Plap | AG | AAACC | GATAACCCC | CG  | TTAAACCTCA | CCACCCC  | TTGTTA    | ---    | ACCCC   | GCCTATAT    |

|      |    |      |            |    |     |          |         |            |        |        |       |       |       |
|------|----|------|------------|----|-----|----------|---------|------------|--------|--------|-------|-------|-------|
| Plal | TG | AATC | -GATAATCCC | CG | -TT | CAACCTCA | CCACCCC | TTGC       | ---    | TCGACC | GC    | TATAT |       |
| Sami | AG | AATC | -GATAATCCC | CG | -TT | CAACCTCA | CCACCCC | TTGTTG     | -A     | -CCC   | GC    | TATAT |       |
| Rere | AG | AATC | -GATACTCCC | CG | -TT | CAACCTCA | CCACCCC | TTGTT      | ---    | CAACCC | GC    | TATAT |       |
| Gama | AG | AACC | -GATAACCCC | CG | -TT | TAACCTCA | CCTCCCC | TTGTT      | ---    | ATCACC | GC    | TATAT |       |
| Onmy | AG | AACC | -GATAACCCC | CG | -TT | CAACCTCA | CCACCCC | TTGTTT     | -TA    | -CCC   | GC    | TATAT |       |
| Sasa | AG | AACC | -GATAACCCC | CG | -TT | CAACCTCA | CCACCTC | TTGTTTT    | -C     | -CCC   | GC    | TATAT |       |
| Cola | AG | AACC | -GATAACCCC | CG | -TT | CAACCTCA | CCACCTC | TTGT       | ---    | TTTCCC | GC    | TATAT |       |
| Dita | AG | AACC | -GATAACCCC | CG | -TT | CAACCTCA | CCACCTC | TTGTCGT    | ---    | CCCC   | GC    | TATAT |       |
| Gogr | AA | AACC | -GATTATCCC | CG | -TT | CAACCTTA | CCACCCC | TTGCCA     | ---    | ACCCC  | GC    | TATAT |       |
| Chsl | TA | AACC | -GATAATCCC | CG | -TT | CAACCTCA | CCACCTC | TCGT       | -TT    | -T     | -CCA  | GT    | TATAT |
| Atja | AG | AACC | -GATAATCCA | CG | -TT | CAACCTCA | CCACCTC | TTGTTTAA   | ---    | CACA   | GC    | TATAT |       |
| Iido | AG | AACC | -GATAATCCC | CG | -TT | CAACCTCA | CCACCCC | TTGTT      | ---    | AATACA | GC    | TATAT |       |
| Auja | AG | AACC | -GATGATCCC | CG | -TT | CAACCTCA | CCATTTT | TTGC       | -TTGC  | ---    | CC    | GC    | TATAT |
| Chag | AG | AATC | -GATAGTCCC | CG | -CT | TAACCTCA | CCATCCC | TGGCTC     | -AA    | ACCCC  | GC    | TATAT |       |
| Hami | AG | AACC | -GATGATCCC | CG | -TT | CAACCTCA | CCATTTT | TTGTTCA    | -T     | -TCC   | GC    | TATAT |       |
| Saun | AG | AACC | -GATGATCCC | CG | -TT | CAACCTCA | CCACTTC | TTGTT      | ---    | TCTCCC | GC    | TATAT |       |
| Nema | AG | AACC | -GATAACCCC | CG | -TT | CAACCTCA | CCACTTC | TTGTTA     | ---    | TCCC   | -GC   | TATAT |       |
| Disp | AG | AACC | -GATAACCCC | CG | -TT | CAACCTCA | CCACTTC | TGGCTCGAT  | -ATT   | CC     | GC    | TATAT |       |
| Myaf | AG | AACC | -GATAACCCC | CG | -TT | CAACCTCA | CCACTTC | TAGCTC     | -AA    | -CCC   | GC    | TATAT |       |
| Lagu | AG | AACC | -GATACTCCC | CG | -TT | TAACCTCA | CCACCCC | TAGCC      | ---    | CAAGCC | GC    | TATAT |       |
| Trtr | AG | AACC | -GATACTCCC | CG | -TT | TAACCTTA | CCCTCTC | TTGTT      | ---    | CCA    | -GC   | TATAT |       |
| Zucr | AG | AACC | -GATAACCCC | CG | -TT | AAACCTTT | CCCTCTC | TAGTT      | ---    | CCC    | ACT   | GC    | TATAT |
| Pxja | AG | AACC | -GATAACCCC | CG | -TT | CAACCTCA | CCACCCC | TTGTTAA    | -GA    | ---    | CC    | GC    | TATAT |
| Pxlo | AG | AACC | -GATAACCCC | CG | -TT | CAACCTCA | CCACCCC | TTGTTA     | ---    | AA     | CC    | GC    | TATAT |
| Pctr | AA | AACC | -GATACTCCC | CG | -TT | GAACCTCA | CCACCTT | TTGTTA     | ---    | ACCCC  | GC    | TATAT |       |
| Apsa | AA | AACC | -GATAACCCC | CG | -TT | TAACCTCA | CCCCCTT | TTGTT      | ---    | TA     | ACC   | GC    | TATAT |
| Cabe | AT | AACC | -GATAACCCC | CG | -TT | AAACCTCA | CCTCTCC | TAGT       | -TA    | -T     | -CACA | GC    | TATAT |
| Bzze | AG | AACC | -GATAACCCC | CG | -TT | CAACCTCA | CCCCCTC | TTGTTT     | -C     | -CCC   | GC    | TATAT |       |
| Siim | AG | AACC | -GATAATCCC | CG | -TT | CAACCTCA | CCCCCTC | TTGCAAT    | -T     | -TCA   | GC    | TATAT |       |
| Ctru | AG | AACC | -GATAACCCC | CG | -TT | TAACCTCA | CCCCCTC | TAGTT      | ---    | CCTTCC | -GC   | TATAT |       |
| Dpbr | AG | AACC | -GATAACCCC | CG | -TT | TAACCTCA | CCCCCTC | TAGTTCATC  | ---    | CC     | GC    | TATAT |       |
| Caki | AT | AACT | -GACAACCCC | CG | -TT | AAACCTCA | CCACCCC | TTGTCA     | -AA    | -TCC   | GC    | TATAT |       |
| Phja | AG | AACT | -GATGATCCC | CG | -TT | TAACCTCA | CCACCTC | TTGCTTA    | -T     | -TCT   | GT    | TATAT |       |
| Brsp | AG | AACT | -GATATTCCC | CA | -TT | AAACCTCA | CCCTCCC | TGGCT      | ---    | TAA    | -TCC  | GC    | TATAT |
| Gamo | AG | AACT | -GATAACCCC | CG | -TT | TAACCTCA | CCATCCT | TTGTTT     | -TC    | -CCC   | GC    | TATAT |       |
| Lolo | AG | AACT | -GATAACCCC | CG | -TT | AAACCTCA | CCATCCT | TTGTTTA    | -A     | ---    | CCC   | GC    | TATAT |
| Batr | AA | AACC | -GATACTCCC | CG | -CT | TACCTCA  | CCCCCTC | TAGC       | -CTTTT | ---    | CA    | GC    | TATAT |
| Prmy | AT | AACC | -GATAATCCA | CG | -TT | AAACCTTA | CCCTTTT | TTGCATC    | -C     | ---    | A     | GC    | TATAT |
| Loli | AA | AACC | -GATAACCCC | CG | -TT | AAACCTCA | CCCCCCC | TTGCACTAT  | ---    | CC     | GC    | TATAT |       |
| Loam | AG | AACC | -GATAACCCC | CG | -TT | AAACCTCA | CCCCCTC | TTGTCAT    | -T     | -ACC   | GC    | TATAT |       |
| Chab | AG | AACC | -GATAACCCC | CG | -TT | CAACCTCA | CCCTTTT | TTGTTATCC  | ---    | CC     | GC    | TATAT |       |
| Chto | AG | AACC | -GATAACCCC | CG | -TT | CAACCTCA | CCCTTTT | TTGTTATCC  | ---    | CC     | GC    | TATAT |       |
| Majo | AG | AACC | -GATAATCCC | CG | -TT | CAACCTCA | CCCCCTC | CTGTCAA    | ---    | TTCT   | GC    | TATAT |       |
| Hlst | AG | AACC | -GACAACCCC | CG | -TT | CAACCTCA | CCCTCCC | TTGTTT     | -TC    | -CCC   | GC    | TATAT |       |
| Clpe | AG | AACC | -GATAATCCC | CG | -TT | CAACCCGA | CCCTTTT | TTGTTT     | -AT    | ACCCC  | GC    | TATAT |       |
| Mlmr | AG | AACC | -GATGATCCC | CG | -TT | CAACCTCA | CCCTTTT | TTGCTC     | -C     | ---    | CCC   | GC    | TATAT |
| Crcr | AG | AACC | -GATAACCCC | CG | -TT | CAACCTCA | CCCTCTC | TTGTTT     | ---    | A      | -TCCC | GC    | TATAT |
| Muce | AT | AACC | -GATAACCCC | CG | -TT | CAACCTCA | CCCTCTC | TTGTTTA    | -T     | -CCC   | GC    | TATAT |       |
| Bege | AG | AACC | -GATACTCCC | CG | -TT | AAACCTCA | CCCTCTC | TTGTTTCATC | ---    | CC     | GC    | TATAT |       |
| Mela | AG | AACC | -GATAACCCC | CG | -TT | TAACCTCA | CCCCCTC | TTGCTC     | ---    | T      | -TACC | GC    | TATAT |
| Hats | AG | AACC | -GATAACCCC | CG | -TT | AAACCTCA | CCCTCCC | TTGCTCTTT  | ---    | CC     | GC    | TATAT |       |
| Orla | AG | AACC | -GATAACCCC | CG | -TT | AAACCTCA | CCCTCCC | TTGT       | ---    | TCTTCC | GC    | TATAT |       |

Cosa AGAACCG-GACAACCCCG-TTAAACCTCACCCTCCC TTGTTA-TTACCC-GCCTATAT  
 Exsp AGAACCG-GATAATCCCG-TTAAACCTCACCCTCTC TTGTCT-TC---CCGCCTATAT  
 Depa AGAACCG-GATAACCCCG-TTCAACCTCACCCTTTC TTGT-TTATC---CCGCCTATAT  
 Rima ATAACCG-GATAATCCCG-TTAAACCTTACCCTTCTC TTGCT-----CCAGCCTATAT  
 Fuol AGAACCG-GATAACCCCG-TTAAACCTCACCCCCTC TGGT-TATTT---CCGCCTATAT  
 Gmaf AGAACCG-GATAACCCCG-TTAGACCTCACCTTTTC TTGT---CTATCCC GGCCTATAT  
 Xeei AGAACCG-GATAACCCCG-TCTAACCTCACCTTCCC TTGCCTA-T---CCCGCCTATAT  
 Pros AGAACCG-GATACCCCG-TTCAACCTCACCTCCCC TTGTTT---C-CCCC GGCCTATAT  
 Scmi AGAACCG-GACACCCCG-TTCAACCTCACCTCCCC TTGTTT---TTTCT GGCCTATAT  
 Rolo AGAACCG-GATAACCCCG-TTCAACCTCACCCCCCC TTGTTTT---TACC GGCCTATAT  
 Cere AGAACCG-GATAATCCCG-TTCAACCTCACCCCCC TTGTTTT--C-CCC GGCCTATAT  
 Daga AGAATCG-GATAACCCCG-TTTAACCTCACCCCCC TTGT---TCATCCC GGCCTATAT  
 Anco AGAACCG-GATAACCCCG-TTCAACCTCACCTCTC TTGTTTT--C-CCC GGCCTATAT  
 Dmve AGAACCG-GATAATCCCG-TTCAACCTCACCTCTC TTGTCCC---ATTCC GGCCTATAT  
 Dmar AGAACCG-GATAATCCCG-TTCAACCTCACCTCTC TTGTCCC-ACT--CCGCCTATAT  
 Anka AGAACCG-GATAACCCCG-TTCAACCTCACCTCTC TTGTCCC-CCCCCC GGCCTATAT  
 Moja AGAACCG-GATAACCCCG-TTCAACCTCACCTCTC TTGTT---TTCCC GGCCTATAT  
 Hoja AGAACCG-GATAACCCCG-TTCAACCTCACCTCTC TTGTTTT--C-CCC GGCCTATAT  
 Bede AGAACCG-GATAACCCCG-TTCAACCTCACCCCCC TTGTTTT---TTCC GGCCTATAT  
 Bsp AGAACCG-GATAACCCCG-TTCAACCTCACCCCCC TTGTTTT---TCC GGCCTATAT  
 Mysp AGAACCG-GATACTCCCG-TTCAACCTCACCTTTTC TTGTTA-A---CCCGCCTATAT  
 Osja AGAACCG-GATAATCCCG-TTCAACCTCACCTCTC TTGT---TCAACC GGCCTATAT  
 Sgro AGAACCG-GATAATCCCG-TTCAACCTCACCTTTC TAGTTA---ACCC GGCCTATAT  
 Pzpa AGAACT-GATAATCCCG-TTAAACCTCACCCCCC TTGTTA---ATACC GGCCTATAT  
 Zeja ATAACT-GATAACCCCG-TTTAACCTCATCACCCC TTGTCA---TACC GGCCTATAT  
 Znne AGAACCG-GATAACCCCG-TTCAACCTCACACCCC TTGTTAA-TA---CCGCCTATAT  
 Zefa AGAACT-GATAACCCCG-TTAAACCTCACAGCCC TTGTTA---ATACC GGCCTATAT  
 Acni AGAACT-GATAACCCCG-TTAAACCTCACGCCCC TTGTTAACA---CCGCCTATAT  
 Ncrh AGAACT-GATAACCCCG-TTAAACCTCACGCCCC TTGTTA---ACACC GGCCTATAT  
 Agca AGAACCG-GATAACCCCG-TTCAACCTTACCCTTTC TTGT---TTTCCC GGCCTATAT  
 Hydy AGAACCG-GATAACCCCG-TTCAACCTCACCTCTC TTGTTT---ATCCC GGCCTATAT  
 Gsac AGAACCG-GATAACCCCG-TTCAACCTCACCTCCCC TTGT---TAATACC GGCCTATAT  
 Pevo AGAACCG-GATAACCCCG-TTCAACCTCACCTTTC TTGTT---ATC-TCC GGCCTATAT  
 Hiku ATAACT-GATAACCCCG-TTAAACCTCACCTTAT TTGCCTA-AT---CATCTATAT  
 Inpa ATAATCG-GATAACCCCG-CTCAACCTCACCTTCCC TTGCC-----CTCA GGCCTATAT  
 Auch CCAACC-GACTTCCCG-TTAAACCTCACCTTTC TCGTAA--C-TTACA GGCCTATAT  
 Fico AGAACCG-GATACCCCG-TTCAACCTCACCTCCC TTGTT---TTACC GGCCTATAT  
 Macs AGAACCG-GATAACCCCG-TTCAACCTCACCTCCC TTGT---TTCTCCC GGCCTATAT  
 Moal ATAACCG-GATAATCCCG-TTAAACCTCACCTCTC TTGCT---TTTCCC GGCCTATAT  
 Syma ATAACCG-GATACTCCCG-TTAAACCTTACCCTCCC TTGT---TTAATCC GGCCTATAT  
 Maf r ATAACCG-GATAACCCCG-TTCAACCTCACCTTCTI TTGTTA---ACCC GGCCTATAT  
 Dcpe AGAACCG-GATTCCCCCG-TTCAACCTCACCTCTC TTGCTC---CTCCC GGCCTATAT  
 Dct i AGAACCG-GATTCCCCCG-TTCAACCTCACCTCTC TTGCTC-T-T-CCC GGCCTATAT  
 Hehi AGAACCG-GATAACCCCG-TTCAACCTCACCTTTC TTGTT---TATCC GGCCTATAT  
 Stam AGAACCG-GATAACCCCG-TTCAACCTCACCTTTC TTGTTTT--C-CCC GGCCTATAT  
 Hogi AGAACCG-GATGACCCCG-TTCAACCTCACCTTTC TTGT---TAAACC GGCCTATAT  
 Erzo AGAACCG-GATAACCCCG-TTCAACCTCACCTTTC TTGTTTT-C---CCGCCTATAT  
 Hxot AGAACCG-GATAACCCCG-TTCAACCTCACCTTTC TTGTTTT-TC---CCGCCTATAT  
 Core AGAACCG-GATAACCCCG-TTCAACCTCACCTTTC TTGTT---TTA-CCC GGCCTATAT  
 Apve AGAACCG-GATAACCCCG-TTCAACCTCACCTTTC TTGTT---TTTCCC GGCCTATAT  
 Lat j ATAACCG-GACAATCCCG-TTTAACCTCACCCCCC TTGCTC---TACC GGCCTATAT  
 Laja AGAACCG-GATAATCCCG-TTCAACCTCACCTTTC TTGTTC--ATT-CCC GGCCTATAT



Syja ATAAACCG-GATAACCCCG-TTCAACCTCACCCTTCC TTGTTCC--TT--CCC GCCATAT  
 Epme ATAAACCG-GATAACCCCG-TTCAACCTCA CCTTTCC TAGTCAT---TCCC GCCATAT  
 Grse AGAAACCG-GATAACCCCG-TTCAACCTCA CCTTTCC TTGTTT---TTTCC- GCCATAT  
 Clja AGAAACCG-GATAGTCCCG-TTCAACCTCA CCTTTCC TTGTTAA-TA--CCC GCCATAT  
 Ogcy AGAAACCG-GATAATCCCG-TTAAACCTCA CCCCCTT TTGCCCC-TT--TCC GCCATAT  
 Plna AGAAACCG-GATAATCCCG-TTAAACCTCA CCTTCTC TTGCA---ATT-TCAGTATAT  
 Lema AGAAACCG-GATAACCCCG-TTCAACCTCA CCCTTCC TTGTTT--TT--TCC GCCATAT  
 Etzo AGAAACCG-GATAACCCCG-TTCAACCTCA CCTCCCC TTGT---TCATCCC GCCATAT  
 Apse AGAAACCG-GATGACCCCG-TTCAACCTCA CCTTCTC TTGTTCT-C---CCC GCCATAT  
 Epde AGAAACCG-GATAACCCCG-TTCAACCTCA CCCTTCC TTGTT---CTCCCC GCCATAT  
 Slja AGAAACCG-GATAATCCCG-TTCAACCTCA CCCCCTC TTGCTC--T-GATCC GCCATAT  
 Bsja GGAAACCG-GATAATCCCG-TTCAACCTCA CCCTTTC TTGTTTT--T--CCC GCCATAT  
 Ecna AGAAACCG-GATAACCCCG-TTCAACCTCA CCCTCCC TTGTTTT---TTCC GCCATAT  
 Cohi ATAAACCG-GATAATCCCG-TTAAACCTCA CCTTCTC TCGC---AATATCA GCCATAT  
 Caar AGAAACCG-GATAACCCCG-TTAAACCTCA CCCTCTC TAGTTTAA---TACC GCCATAT  
 Came AGAAACCG-GATAATCCCG-TTCAACCTCA CCCCCCC TAGCTTT-T---TCC GCCATAT  
 Mema AGAAACCG-GATAACCCCG-TTCAACCTCA CCCTCCC TTGC---TTATCCC GCCATAT  
 Lenu GTAAACCG-GATACCCCG-TTCAACCTCA CCCTTTC TTGCCC--C-TCCC GCCATAT  
 Plma ATAAACCG-GATAACCCCG-TTCAACCTCA CCCTCCC TTGTCTC---TCCC GCCATAT  
 Emst AGAAACCG-GATAACCCCG-TTCAACCTCA CCCTTCC TTGTT---TTT-CCC GCCATAT  
 Ptti AGAAACCG-GATTACCCCG-TTCAACCTCA CCTTTCC TTGTCCC-T---CCC GCCATAT  
 Losu AGAAACCG-GATAATCCCG-TTCAACCTCA CCCCCTC TTGCACT-TATATCA GCCATAT  
 Geoy AGAAACCG-GATACTCCCG-TTAAACCTCA CCCCCTC TTGTCTC-T---TCC GCCATAT  
 Dipi AGAAACCG-GATAACCCCG-TTCAACCTCA CCCTTCC TTGTTT---ACCC- GCCATAT  
 Pama AGAAACCG-GATAATCCCG-TTCAACCTCA CCCTTCC TTGCTTG-T---CCC GCCATAT  
 Leob AGAAACCG-GATAATCCCG-TTCAACCTCA CCCCCTC TTGT---TAATCCC GCCATAT  
 Neba ATAAACCG-GATAATCCCG-TTAAACCTCA CCCTTCC CAGCCCA--ATTCCA GCCATAT  
 Pdpi AGAAACCG-GATAACCCCG-TTCAACCTCA CCCTCTC TTGC--C-CCTTCCC GCCATAT  
 Nimi AGAAACCG-GATAATCCCG-TTCAACCTCA CCCTTCC TTGTCC---TTTCC GCCATAT  
 Uptr AGAAACCG-GATAATCCCG-TTCAACCTCA CCCCCTC CTGTCA---ATTCT GCCATAT  
 Pesc AGAAACCG-GATACTCCCG-TTCAACCTCA CCCCCTC TTGCC---CAATCA- GCCATAT  
 Baar ATAAACCG-GATGACCCCG-TTCAACCTCA CCCTTCC TTGTTTT---TCCC GCCATAT  
 Moar AGAAACCG-GATAACCCCG-TTCAACCTCA CCCTTCC TTGTTTT---TCCC GCCATAT  
 Toja ATAAACCG-GATAACCCCG-TTCAACCTCA CCCCCTC TTGTT---TAAAC- GCCATAT  
 Chau AGAAACCG-GATAATCCCG-TTAAACCTCA CCCTTCC TTGTCA---TTTCC GCCATAT  
 Chse AGAAACCG-GATAATCCCG-TTCAACCTCA CCCTTCC TTGTTCT---TACC GCCATAT  
 Enar AGAAACCG-GATAACCCCG-TTCAACCTCA CCCTTCC TTGT-TTTC---CC GCCATAT  
 Hpty AGAAACCG-GATAACCCCG-TTCAACCTCA CCCTTCC TTGT---TTTCCC GCCATAT  
 Nana AAACCG-GATAACCCCG-TTAAACCTCA CCCCCTC TTGT-TATCC---CA GCCATAT  
 Mcst AGAAACCG-GATAACCCCG-TTCAACCTCA CCCTTCC TTGTTT---AACCC GCCATAT  
 Rhox AGAAACCG-GATAACCCCG-TTCAACCTCA CCCTTCC TTGC--T-CTTTCC GCCATAT  
 Opfa AGAAACCG-GATAACCCCG-TTCAACCTCA CCCTTCC TTGCCT--C--CCC GCCATAT  
 Paar AGAAACCG-GATGATCCCG-TTAAACCTCA CCTCTC TTGTTCC-TAT-CCC GCCATAT  
 Gozo GGAAACCG-GATACCCCG-TTCAACCTCA CCCCCTC TTGTT---TTTCCC GCCATAT  
 Ackr AGAAACCG-GATTCCCGCG-TTAAACCTCA CCTTTCC TTGCCCA-A---CCC GCCATAT  
 Elev AGAAACCG-GATAACCCCG-TTAAACCTCA CCCTTCC TAGCCTT--T-TTCC GCCATAT  
 Trdu AGAAACCG-GATAACCCCG-TTAAACCTCA CCCTCTC TTGTTCT--T--CCC GCCATAT  
 Amoc AGAAACCG-GATAACCCCG-TTGAACCTCA CCCTCCC TTGT-TAATA---CC GCCATAT  
 Hame AGAAACCG-GATAATCCCG-TTAAACCTCA CCTTTCC TTGTCTT-TA--TCC GCCATAT  
 Chso AGAAACCG-GATAATCCCG-TTCAACCTCA CCTTTTC TTGCT---TATTCC GCCATAT  
 Lyto AGAAACCG-GATAGCCCGCG-TTCAACCTCA CCTTTCC TTGT---TTTACC GCCATAT  
 Encr AGAAACCG-GATAACCCCG-TTCAACCTCA CCTTTCC TTGTTTT---TCCC GCCATAT

|      |          |             |            |          |                 |                 |
|------|----------|-------------|------------|----------|-----------------|-----------------|
| Bvar | AGAAACCG | GACAACCCCG  | TTCAACCTCA | CCCTTTCC | TTGTTT----      | CTCCCGCCTATAT   |
| Noco | AGAAACCG | GATAACCCCG  | TTCAACCTCA | CCCTTTCC | TTGT-TTTTC---   | CCGCCTATAT      |
| Chsp | ATAAACCG | GATAACCCCG  | TTAAACCTCA | CCCTCTT  | TTGT----        | TCCAACCGCCTATAT |
| Arja | AGAAACCG | GATAACCCCG  | TTCAACCTCA | CCCTTTCC | TTGTTTT-T---    | CCCGCCTATAT     |
| Pase | AGAAACCG | GATAATCCTCG | TTAAACCTCA | CCTCTCC  | TTGCAACGTGACCCA | GTCTATAT        |
| Trel | AGAAACCG | GATAACCCCG  | TTTAACCTCA | CCCCCTC  | TTGTTT---       | AGTCA-GTCTATAT  |
| Lifa | AGAAACCG | GACTCTACA   | TTTAACCTCA | CCCCCTCC | TAGT-A--AG--CCA | GCCTATAT        |
| Acur | AAATACCG | GATAACCCCG  | TTTAACCTCA | CCCCCTC  | TAGTTCA--TTTTCC | GCCTGATAT       |
| Ampe | AGAAACCG | GATAACCCCG  | TTCAACCTCA | CCCCCTC  | TTGTTT----      | ATCCCGCCTATAT   |
| Urja | AAAACCG  | GATGACCCCG  | TTCAACCTCA | CCCTCCC  | TTGTCTT-T---    | TCCGCCTATAT     |
| Enet | GGAAACCG | GATACCCCG   | TTAAACCTCA | CCCTCCC  | TGGCT----       | AATCCCGTCTATAT  |
| Ptbr | AGAAACCG | GATACCCCG   | TTAAACCTCA | CCCTTTCC | TTGCC----       | CAACCCGTCTATAT  |
| Safa | AGAAACCG | GATAACCCCG  | TTAAACCTCA | CTTTTTT  | TTGCCCGCCA---   | CCGCCTATAT      |
| Icae | GTAAACCG | GATGACCCCG  | TTCAACCTCA | CCCTCCC  | TTG---T-CTCTCCC | GCCTATAT        |
| Asmi | ATAAACCG | GATAACCCCG  | TTAAACCTCA | CCCTCAC  | TTGT----        | TTA-TCAGCCTATAT |
| Foal | ACAAACCG | GATAATCCCG  | TTAAACCTCA | CCCTTTT  | TTGTTCTTTC---   | CCGCCTGATAT     |
| Drze | AGAAACCG | GATAATCCCG  | TTCAACCTCA | CCCTCTC  | TTGCACT-TTATTCA | GCCTATAT        |
| Rhas | AGAAACCG | GATAACCCCG  | TTCAACCTCA | CCCTTTCC | TTGTCTT-T---    | CCCGCCTATAT     |
| Elac | AGAAACCG | GATAACCCCG  | TTCAACCTCA | CCCTCCC  | TTGT----        | TGTCCCCGCCTATAT |
| Kugu | AGAAACCG | GATAATCCCG  | TTCAACCTCA | CCCCCTC  | TTGTTTA--TATCCA | GCCTGATAT       |
| Plor | AGAAACCG | GATACCCCG   | TTAAACCTCA | CCCCCTC  | TTGTTA----      | CTTCCGTCTATAT   |
| Sgun | AGAAACCG | GATAACCCCG  | TTAAACCTCA | CCCTTTCC | TTGTTTA--T---   | CCCGCCTATAT     |
| Zaco | AGAAACCG | GATGCCCCCG  | TTCAACCTCA | CCCTTTCC | TTGTTTT----     | CCCCGCCTATAT    |
| Zbfl | AGAAACCG | GATAACCCCG  | TTCAACCTCA | CCCTTTCC | TTGT-TTTC---    | CCGCCTATAT      |
| Spba | ATAAACCG | GATAAACCCCG | TTCAACCTCA | CCCTCTC  | TTGCTT-T-ATTCC  | GCCTATAT        |
| Game | ATAAACCG | GATGACCCCG  | TTCAACCTCA | CCCTCCC  | TTGTTTT-T---    | CCCGCCTATAT     |
| Thth | ATAAACCG | GATGACCCCG  | TTCAACCTCA | CCCTCCC  | TTGTT---TCT-CCC | GCCTATAT        |
| Xigl | AGAAACCG | GATAACCCCG  | TTCAACCTCA | CCCTCCC  | TTGCTT----      | TTCCCGCCTATAT   |
| Hyja | GTAAACCG | GATACTCCCG  | TTAAACCTCA | CCCTCTC  | TTGT----        | TTTTCCCGCCTATAT |
| Psan | ATAAACCG | GATAATCCCG  | TTAAACCTCA | CCCTCTC  | TTGTT---TTTTCC- | GCCTATAT        |
| Cupa | ATAAACCG | GATGACCCCG  | TTTAACCTCA | CCCTCCC  | TTGTTTT-T---    | CCCGCCTATAT     |
| Mpch | AGAAACCG | GATAACCCCG  | TTCAACCTCA | CCCTCTC  | TTGTTT---T-TCCC | GCCTATAT        |
| Char | AGAAACCG | GATAACCCCG  | TTTAACCTCA | CCCTCCC  | TTGT----        | TTATCCCGCCTATAT |
| Pser | AGAAACCG | GATAACCCCG  | TTCAACCTCA | CCCTCCC  | TTGTTCC-TT--TCC | GCCTATAT        |
| Prol | AGAAACCG | GATAACCCCG  | TTAAACCTCA | CCCTCTC  | TTGCCTC-A---TCC | GCCTATAT        |
| Plbi | AGAAACCG | GATAACCCCG  | TTAAACCTCA | CCCTCTC  | TTGTTT----TATCC | GCCTATAT        |
| Calu | ATAAACCG | GATAATCCCG  | TTAAACCTCA | CCCCCCC  | TTGCTCC-TGT-CCC | GCCTATAT        |
| Papa | GTAAACCG | GATGATCCCG  | TTCAACCTCA | CCCTCTC  | TAGCTCA--A--TCA | GCCTGATAT       |
| Sufr | AGAAACCG | GATAACCCCG  | TTCAACCTCA | CCCTTTCC | TTGTT----CAACCC | GCCTATAT        |
| Stci | GGAAACCG | GATAATCCCG  | TTAAACCTCA | CCTTTTT  | TTGTTCT-C---CCC | GCCTATAT        |
| Taru | AAAAACCG | GATACTCCCG  | TTCAACCTCA | CCCCCTC  | TTGTTT----TAACC | GCCTATAT        |
| Rala | AGAAACCG | GATAACCCCG  | TTAAACCTCA | CCCTTTCC | TTGTT---TCTCCC- | GCCTATAT        |

\*\*            \* \*            \*\*\*            \*            \* \* \*\*

|      | 35           | 36           | 36'                                 |
|------|--------------|--------------|-------------------------------------|
| Scca | ACC-GCCGTCGT | CAGCTC-ACCCC | GT-GAGGGTT----AAAA-----AGTAAGCAAAAA |
| Muma | ACC-GCCGTCGT | CAGCTC-ACCCT | GT-GAAGG-GT---CAAA-----AGTAAGCAAAAA |
| Erca | ACC-GCCGTCGC | CAGCCT-ACCTT | CT-GAGAGAC---CTAA-----AGTAGGCTAAAT  |
| Pose | ACC-GCCGTCGC | CAGCCT-ACCTT | TT-GAAGAC---CCTA-----AGTAGGCTAAT    |
| Actr | ACC-GCCGTCGT | CAGCTT-ACCCT | GT-GAAGAC---TAAT-----AGTAAGCAAAAA   |
| Scal | ACC-GCCGTCGT | CAGCTT-ACCCT | GT-GAAGAC-C---AAT-----AGTAAGCAAAAA  |
| Posp | ACC-GCCGTCGT | CAGCTT-ACCCT | GT-GAAGACC---AA-T-----AGTAAGCAAAAA  |
| Atsp | ACC-GCCGTCGC | CAGCTT-ACCCT | GT-GAAGGAAA---AAC-----AGTAAGCAAGA   |
| Leoc | ACC-GCCGTCAC | CAGCTT-ACCCT | GT-GAAGGAAA---AC-----AGTGAGCAAAAA   |
| Amca | ACC-GCCGTCGT | CAGCTT-ACCCT | GT-GAAGGCTA---AT-----AGTAAGCAGAAA   |
| Osbi | ACC-GCCGTCGC | AAGCTC-ACCCT | AT-GAAGGAAA---TAGT-----AGCAAGCAAGAA |
| Pabu | ACC-ACCGTCGC | AAGCTC-ACCCT | AT-GAAGGTCT---AAT-----AGTAAGCAAAAT  |
| Hial | ACC-GCCGTCGT | CAGCTT-ACCCT | GT-GAAGGAT---TAAT-----AGTAAGCAAGAT  |
| Elha | ACC-ACCGTCGC | CAGCTT-ACCCT | GT-GAAGGA--C--CAAT-----AGTAAGCCTAAT |
| Mlcy | ACC-GCCGTCGC | CAGCTT-ACCCT | AT-GAAGGTC---CAAC-----AGTAAGCCAAA   |
| Algl | ACC-GCCGTCGT | CAGCTT-ACCTT | GT-GAGGGAT---TAGT-----AGTAAGCTAAT   |
| Ptgi | ACC-GCCGTCGC | CAGCTT-ACCTT | AT-GAGGGAC---TAAT-----AGTAAGCCTAAT  |
| Alaf | ACC-GCCGTCGC | CAGCTC-ACCTT | GT-GAAGATAA---AT-----AGTGAGCCTAAT   |
| Nock | ACC-GCCGTCGC | CAGCTC-ACCTT | GT-GAAGAC---TAAT-----AGTGAGCTAAT    |
| Anja | ACC-GCCGTCGC | CAGCTT-GCCTC | TT-GAGAGATT---AA-A-----AGCAAGCCTAAT |
| Gyki | ACC-GCCGTCGC | CAGTTT-ACCTT | TT-GAAGACA---AC-----AGTAAGCAAAAC    |
| Syka | ACC-GCCGTCGC | CAGCTT-ACCTT | AT-GAAGCAC---AAC-----AGTAAGCAAAT    |
| Opma | ACC-ACCGTCGC | CAGCTT-ACCCC | CT-GAGGG-TA---TAAC-----AGTAAGCTAAAT |
| Comy | ACC-GCCGTCGC | CAGCTT-GCCTT | GT-GAAGACAG---AT-----AGCAAGCAAAT    |
| Sasp | ACC-GCCGTCGC | CAGCTT-ACCTT | CT-AAAGAGAA---TGGT-----AGTGAGCCAAA  |
| Eupe | ACC-ACCGTCGT | CAGCTT-ACCTC | TC-AAAGAGAA---TGAT-----AGCGAGCAAAT  |
| Enja | ACC-ACCGTCGC | CAGCTT-ACCCT | GT-GAAGGA-----AA-----AGTAAGCGAAAT   |
| Same | ACC-ACCGTCGC | CAGCTT-ACCCT | GT-GAAGGAA---CTAC-----AGTAAGCAGGAT  |
| Chch | ACC-GCCGTCGT | CAGCTT-ACCCT | GT-GAAGG-AT---GCCT-----AGTAAGCAAAAT |
| Grgr | ACC-ACCGTCGC | CAGCTT-ACCCC | GT-GAGGGCCC---TAT-----AGTAAGCAAAAT  |
| Caau | ACC-GCCGTCGT | CAGCTT-ACCCT | GT-GAAGGTAA---TAAA-----AGTAAGCAAAAT |
| Cyca | ACC-GCCGTCGT | CAGCTT-ACCCT | GT-GAAGGTA-A--TAAA-----AGTAAGCAAAAT |
| Dare | ACC-ACCGTCGC | CAGCTT-ACCCT | GT-GAAGGAAT---AAC-----AGTAAGCAAGAT  |
| Cost | ACC-GCCGTCGT | CAGCTT-ACCCT | GT-GAAGGACTA---AT-----AGTAAGCAAGT   |
| Leec | ACC-GCCGTCGT | CAGCTT-ACCCT | GT-GAAGGAT---TAAT-----AGTAAGCTAAT   |
| CrIa | ACC-GCCGTCGT | CAGCTT-ACCCT | GT-GAAGGCT---CAAT-----AGTAAGCAAGT   |
| Clmc | ACC-GCCGTCGC | AAGCTT-ACCCT | GT-GAAGGCCCT---AC-----AGTAAGCAAAAT  |
| Phin | ACC-GCCGTCGC | AAGCTT-ACCCT | AT-GAAGGCCCC---AC-----AGTAAGCACAAT  |
| Icpu | ACC-GCCGTCGT | CAGCTT-ACCCT | GT-GAAGGCCT---AAC-----AGTAAGCAAAAT  |
| Psto | ACC-GCCGTCGT | CAGCTT-ACCCT | GT-GAAGGCTT---AAT-----AGTAAGCAAAAT  |
| Cora | ACC-GCCGTCGC | CAGCTT-ACCCT | AT-GAAGGCAA---AAC-----AGTAAGCAAAAT  |
| Eisp | ACC-GCCGTCGT | CAGCTT-ACCCT | GC-AAAGGCC---AAAC-----AGTAAGCAAAAC  |
| Apal | ACC-GCCGTCGT | CAGCTT-ACCCT | GT-GAAGGTA---AAAT-----AGTAAGCAAAAT  |
| EsLu | ACC-ACCGTCGC | CAGCTT-ATCCT | GT-GAAGGTC---CCAT-----AATAAGCAAAAT  |
| Dape | ACC-ACCGTCGC | CAGCTT-ATCCC | AT-GAGGG-AT---TTAT-----AATAAGCAAAAG |
| Glse | ACC-GCCGTCGT | CAGCTT-ACCCT | GT-GAAGG-CC---TCAT-----AGTAAGCAAAAA |
| Naar | ACC-GCCGTCGT | CAGCTT-ACCCT | GT-GAAGGCCTC---AT-----AGTAAGCAAAAA  |
| Baoc | ACC-GCCGTCGT | CAGCTT-ACCCT | GT-GAAGGTC---TCAT-----AGTAAGCAAAAA  |
| Opso | ACC-GCCGTCGT | CAGCTT-ACCCT | GT-GAAGGCCT---CA-T-----AGTAAGCAGAAA |
| Alte | ACC-GCCGTCGT | CAGCTT-ACCCT | GT-GAAGGCC---CAT-----AGTAAGCAAAAT   |
| Plap | ACC-GCCGTCGT | CAGCTT-ACCCT | GT-GAAGGCC---CCAT-----AGTAAGCAAAAT  |

Plal ACC-GCCGTCGT CAGCTC-ACCCTGT-GAAGGAC----TTAA-----AGTGAGC AAAAT  
 Sami ACC-GCCGTCGT CAGCTC-ACCCTGT-GAAGGTGT----TGA-----AGTGAGC AAAAT  
 Rere ACC-GCCGTCGT CAGCTT-ACCCTGT-GAAGGTT----CCAT-----AGTAAGC AAAAT  
 Gama ACC-GCCGTCGT CAGCAT-ACCCTGT-GAAGGGTT----CAT-----AGTATGC AAGGT  
 Onmy ACC-ACCGTCGT CAGCTT-ACCCTGT-GAAGGCCCC----AT-----AGTAAGC AAAAT  
 Sasa ACC-ACCGTCGT CAGCTT-ACCCTGT-GAAGGCCTT----AT-----AGTAAGC AAAAT  
 Cola ACC-ACCGTCGT CAGCTT-ACCCTGT-GAAGGAT----TTAT-----AGTAAGC AAAAT  
 Dita ACC-GCCGTCGT CAGCTT-ACCCTGT-AAAGG-AC---CCAT-----AGTAAGC AAAAT  
 Gogr ACC-GCCGTCGC CAGCTT-ACCCCTC-AAAGTCC---CCCC-----AGTAAGC AAAAT  
 Chsl ACC-GCCGTCGC AACTT-ACCCTGT-GAGGG-AA---TCAT-----AGTAAGT AAAAA  
 Atja ACC-GCCGTCGT CAGCTT-ACCCCTGC-AAAGGACT---CAT-----AGTAAGC ATAAT  
 lido ACC-GCCGTCGT CAGCTT-ACCCCTGC-AAAGGCC---TTAT-----AGTAAGC ACAAT  
 Auja ACC-GCCGTCGT CAGCTT-ACCCTTT-GAAGGCC---CA-T-----AGTAAGC AAAAT  
 Chag ACC-GCCGTCGT CAGCTT-ACCCCTT-GAAGGAA---TGAT-----AGTAAGC GAAAC  
 Hami ACC-GCCGTCGC CAGCCT-ACCCTCT-AAAGGACCC---AA-----AGTAGGC AAAAT  
 Saun ACC-GCCGTCGC CAGCCT-ACCCTCT-AAAGGAC---CCAA-----AGTAGGC AAAAT  
 Nema ACC-GCCGTCGT CAGCTT-ACCCTGT-GAAGGCCT---AGT-----AGTAAGC TAAAT  
 Disp ACC-TCCGTCGT CAGCTT-ACCCCTGT-GAGGGAAC---CAT-----AGTAAGC TAAAT  
 Myaf ACC-ACCGTCGT CAGCTT-ACCCTGT-GAAGGATAA---AT-----AGTAAGC TAAAT  
 Lagu ACC-GCCGTCGC CAGCTT-ACCCCTGT-GAGGGAC---TAA-----AGTAAGC AAGAC  
 Trtr ACC-GCCGTCGT CAGCTT-ACCCTGT-GAAGGTAA---AAT-----AGTAAGC ATAAA  
 Zucr ACC-GCCGTCGT CAGCTT-ACCCTAT-GAAGGGA---TAAT-----AGTAAGC ATAAA  
 Pxja ACC-GCCGTCGT CAGCTT-ACCCTGT-GAAGGAA---ATAT-----AGTAAGC AAAGT  
 Pxlo ACC-GCCGTCGT CAGCTT-ACCCTGT-GAAGGGA---GTAT-----AGTAAGC AAAAT  
 Pctr ACC-ACCGTCGT CAGCTT-ACCCTGT-GAAGGCC---CCAT-----AGTAAGC AAAAT  
 Apsa ACC-GCCGTCGT CAGCTT-ACCCTGT-GAAGGCC---CAT-----AGTAAGC AAAAT  
 Cabe ACC-GCCGTCGT CAGCTT-ACCCCTGT-GAGGGATA---AGA-----AGTAGAC AAAAT  
 Bzze ACC-GCCGTCGT CAGCTT-ACCCTGT-GAAGGTC---ACAT-----AGTAGGC AGAAT  
 Siim ACC-TCCGTCGC CAGCCT-ACCCCTCT-GAGAGTTTA---AT-----AGTAGGC TCAAT  
 Ctru ACC-GCCGTCGT CAGCTT-ACCCTGT-GAAGGCC---CCAT-----AGTAAGC AAAAT  
 Dpbr ACC-GCCGTCGT CAGCTT-ACCCTGT-GAAGGCCT---CA-T-----AGTAAGC AAAAT  
 Caki ACC-ACCGTCGT AAGCTT-ACCCTACTGAAGGCTAA---AA-----AGTAAGC CCCAA  
 Phja ACT-TCCGTCGT CAGCTA-ACCTTGC-AAAGAAAG--GAAC-----AGTTAGC ACAA  
 Brsp ACC-GCCGTCGT CAGCTA-ACCTTAT-GAAGAGAATCCCAA-----CGTTAGC TCAAG  
 Gamo ACC-ACCGTCGT CAGCTT-ACCCTGT-GAAGGAAA-----AT-----AGTAAGC ATA-A  
 Lolo ACC-ACCGTCGT CAGCTT-ACCCTGT-GAAGG-TA---AAAT-----AGTAAGC ATAAA  
 Batr ACC-GCCGTCCTC CAGTTC-ACCTTAA-AAAGAAC---AA-A-----ATTGAAC ACAAC  
 Prmy ACC-GCCGTCCTI TAGTCT-ACCTTAA-AAAGTT---AAAT-----ATTAGGC AAAAT  
 Loli ACC-GCCGTCGT CAGCTT-ACCCTGT-GAAGGTTT---AG-T-----AGTAAGC AAAAT  
 Loam ACC-GCCGTCCTI CAGCTT-ACCCTGT-GAGGGAT---TAGT-----ACTAAGC AAAGT  
 Chab ACC-GCCGTCGT CAGCTT-ACCCTGT-GAAGGCCT---AA-T-----AGTAAGC AAAAT  
 Chto ACC-GCCGTCGT CAGCTT-ACCCTGT-GAAGGCCT---AA-T-----AGTAAGC AAAAT  
 Majo ACC-GCCGTCGC AAGCCT-ACCCTGT-GAAGGAAC---CAT-----AGTGGGC TATAC  
 Hlst ACC-GCCGTCGT CAGCCT-ACCCCTCT-GAGGGTTAA---AT-----AGTAAGC GAAAT  
 Clpe ACC-TCCGTCGT CAGCTT-ACCCTGT-GAAGGCC---TAA-----AGTAAGC ACAAT  
 Mlmr ACC-TCCGTCGT CAGCTT-ACCCTGT-AAAGG-CC---CAAC-----AGTAAGC AAAAT  
 Crcr ACC-GCCGTCGT CAGCCC-ACCCTGT-GAGGGTCC---AAT-----AGTGAGC AGGAT  
 Muce ACC-GCCGTCGT CAGCCC-ACCCTGT-GAGGGTC---CAAT-----AGTGAGC AGGAT  
 Bege ACC-GCCGTCGT CAGCTT-ACCCTAT-GAAGGCC---CA-A-----AGTAAGC AAAAT  
 Mela ACC-GCCGTCGT CAGCTT-ACCCTGT-GAGGGACT---AAT-----AGTGAGC AAAAT  
 Hats ACC-GCCGTCGC CAGCTT-ACCCTGT-GAAGGCCT---AA-T-----AGTAAGC AAAAT  
 Orla ACC-GCCGTCGT CAGCTT-ACCCTGT-GAAGGAC-A---AAT-----AGTAAGC AAAAC

Cosa ACC-GCCGTCGT CAGCTT-ACCCCAT-GAAGG-AC---TTAT-----AGTAAGCAAGAC  
 Exsp ACC-GCCGTCGT CAGCCT-ACCCTGT-GAAGGCC---TCAT-----AGTGAGCATAAT  
 Depa ACC-GCCGTCGT CAGCTT-ACCCTGT-GAAGGATC---TA-T-----AGTAAGCAAAAC  
 Rima ACC-GCCGTCGT CAGCCC-ACCCTGT-GAAGGCC---CACT-----AGTAGCAAAAC  
 Fuol ACC-GCCGTCGT CAGCCC-ACCCTGT-GAAGGTAT---AA-T-----AGTGAGCCTAAT  
 Gmaf ACC-GCCGTCGT CAGCTT-ACCCTGT-GAAGGAT---TAAT-----AGTAAGCAAAAC  
 Xeei ACC-GCCGTCGT CAGCAT-ACCCTGT-GAAGG-GA---CAAT-----AGTAAGCAAAAT  
 Pros ACC-ACCGTCGT CAGCTG-ACCCTGT-GAAGGACT---TAT-----AGTAAGCAAAAT  
 Scmi ACC-ACCGTCGT CAGCTG-ACCCTAT-GAAGGAC---CCAG-----AGTAAGCACAAT  
 Rolo ACC-ACCGTCGT CAGCTT-ACCCTGT-GAAGGCCT---TAT-----AGTAAGCAAGAT  
 Cere ACC-GCCGTCGT CAGCTT-ACCCTGT-GAAGGTA---AAAT-----AGTAAGCAGAAT  
 Daga ACC-GCCGTCGT CAGCTT-ACCCTAT-GAAGGTA-T---TAT-----AGTAAGCAAGGT  
 Anco ACC-GCCGTCGT CAGCTT-ACCCTGT-GAAGGTT---TAAT-----AGTAAGCAAAAT  
 Dmve ACC-ACCGTCGT CAGCTT-ACCCTCT-GAGGGTCT---TAT-----AGTAAGCAAGAC  
 Dmar ACC-ACCGTCGT CAGCTT-ACCCTTT-GAGGGTC---TCAT-----AGTAAGCAAGAC  
 Anka ACC-GCCGTCGT CAGCTT-ACCCTGT-GAAGG-CC---CCAT-----AGTAAGCAAAAT  
 Moja ACC-GCCGTCGT CAGCTT-ACCCTGT-GAAGGTC---TTAT-----AGTAAGCAAAAT  
 Hoja ACC-GCCGTCGT CAGCTT-ACCCTGT-GAAGGTC---TTAT-----AGTAAGCAAAAT  
 Bede ACC-ACCGTCGT CAGCTT-ACCCTGT-GAAGGCC---TAT-----AGTAAGCAAAAT  
 Bsp ACC-ACCGTCGT CAGCTT-ACCCTGT-GAAGGCC---TAT-----AGTAAGCAAAAT  
 Mysp ACC-GCCGTCGT CAGCTT-ACCCTGT-AAAGG-CC---CTAT-----AGTAAGCAAAAA  
 Osja ACC-GCCGTCGT CAGCTT-ACCCTGT-GAAGGCC---CCAT-----AGTAAGCAAAAA  
 Sgro ACC-GCCGTCGT CAGCTT-ACCCTGT-GAAGGTCT---TAT-----AGTAAGCAAAAG  
 Pzpa ACC-ACCGTCGT CAGCTT-ACCCTGT-GAAGGAAA---AAT-----AGTAAGCAAAAT  
 Zeja ACC-GCCGTCGT CAGCTT-ACCCTGT-GAAGGAAA---AAC-----AGTAAGCAAAAT  
 Zne ACC-GCCGTCGT CAGCTT-ACCCTGT-GAAGGTT---TAAC-----AGTAAGCAAGAC  
 Zefa ACC-GCCGTCGT CAGCTT-ACCCTGT-GAAGGCA---CAAT-----AGTAAGCAAGT  
 Acni ACC-GCCGTCGT CAGCTT-ACCCTGT-GAAGGTAA---AA-C-----AGTAAGCAAAAT  
 Ncrh ACC-GCCGTCGT CAGCTT-ACCCTGT-GAAGGTAA---AAC-----AGTAAGCAAAAT  
 Agca ACC-GCCGTCGT CAGCTT-ACCCTGTTGAAGGCC---CCAC-----AGTAAGCAAAAT  
 Hydy ACC-ACCGTCGT CAGCTT-ACCCTGT-GAGGGAT---TAGT-----AGTGAGCTAAAC  
 Gsac ACC-ACCGTCGT CAGCTT-ACCCTGT-GAGGGAC---TAAT-----AGTAAGCTAAAC  
 Pevo ACC-GCCGTCGT CAGCTT-ACCCTGT-AAAGGACCC---AA-----AGTAAGCAATAT  
 Hiku ACC-GCCGTCGT CAGCTT-ACCCTAT-GAAGGAAACA---AC-----AGTGAGCAGAAT  
 Inpa ACC-GCCGTCGT CAGCTT-ACCCTTT-GAGGA-AC---TTAA-----AGTAAGCCTAAT  
 Auch ACC-GCCGTCGT CAGCCT-ACCCTAT-GATGGAC---CCGC-----AGTGAGCTTGAA  
 Fico ACC-GCCGTCGT CAGCTT-ACCCCGT-GAGGGAC---AAAC-----AGTAAGCAAAAT  
 Macs ACC-GCCGTCGT CAGCTT-ACCCTGT-GAAGGT---T---TAAT-----AGTAAGCAAAAT  
 Moal ACC-GCCGTCGT CAGCTT-ACCCCGT-T-AAAGGTT---CAAC-----AGTAAGCAAAAT  
 Syma ACC-GCCGTCGT CAGCTT-ACCCCGTT-AAAGGCC-A---AAC-----AGTAAGCAAAATC  
 Maf r ACC-GCCGTCGT CAGCTT-ACCCCGCC-AAAGGAT---AAAC-----AGTAAGCAATAT  
 Dcpe ACC-GCCGTCGT CAGCTC-ACCCTTT-GAAGGAAA---AAC-----AGTGGGCAATAC  
 Dct i ACC-GCCGTCGT CAGCTC-ACCCTTT-GAAGGAAAA---AC-----AGTGGGCGAAC  
 Hehi ACC-GCCGTCGT CAGCTT-ACCCTGT-GAAGGCC---TAAA-----AGTAAGCAAC  
 Stam ACC-GCCGTCGT CAGCTT-ACCCTGT-GAAGGTCT---TAT-----AGTAAGCAAAAT  
 Hogi ACC-GCCGTCGT CAGCTT-ACCCCGT-AAAGGAC-A---AAC-----AGTAAGCAAAAT  
 Erzo ACC-GCCGTCGT CAGCTT-ACCCTGT-GAAGGTC---TAAT-----AGTAAGCAAAAC  
 Hxot ACC-GCCGTCGT CAGCTT-ACCCTCT-GAAGGTC---TAAT-----AGTAAGCAAAAC  
 Core ACC-GCCGTCGT CAGCTT-ACCCTGT-GAGGGACTA---AT-----AGTAAGCAAGAC  
 Apve ACC-GCCGTCGT CAGCTT-ACCCTGT-GAAGGAC---GAAT-----AGTAAGCAAAAC  
 Lat j ACC-ACCGTCGT CAGCCT-ACCCTGT-GAAGGCC---AAT-----AGTATGCAAGAC  
 Laja ACC-GCCGTCGT CAGCTT-ACCCTGT-GAAGGTCTA---AT-----AGTAAGCAATAT



Syja ACC-GCCGCGTCAGCTT-ACCCTGT-GAAGGATCC----AT-----ATAAGC AAAAT  
 Epme ACC-GCCGTCGCAGCTT-ACCCTGT-GAAGG-CC---CCCT-----AGTAAGC TTAAT  
 Grse ACC-GCCGCGTCAGCCT-ACCCTGT-GAAGGCC---AGC-----AGTGAGC AAAAT  
 Clja ACC-GCCGTCGCAGCTT-TCCCGT-GAAGG-TT---AAAT-----AGTTAGC ACAAT  
 Ogcy ACC-GCCGTCGTAGCTT-ACCCTGT-AAAGGATCA----AT-----AGTAGGC TCAAT  
 Plna ACC-GCCGTCGTAGCTT-ACCCTGC-GAAGGCGC----AT-----AGTAAGC GCAAT  
 Lema ACC-ACCGTCGTAGCTT-ACCCTGT-GAAGGCCTT----AT-----AGTAAGC AAAAT  
 Etzo ACC-GCCGTCGTAGCTT-ACCCTGT-GAAGGTA----AAAT-----AGTAAGC AAAAT  
 Apse ACC-GCCGTCGTAGCCT-ACCCTGT-GAAGGCCA----GT-----AGTGAGC AGAAT  
 Epde ACC-GCCGTCGTAGCTT-ACCCTGT-GAAGGAC---TCAT-----AGTAAGC AAAAT  
 Slja ACC-GCCGTCGCAGCTT-ACCCTTT-GAAGGAC---TAAT-----AGTAAGC ACAAT  
 Bsja ACC-GCCGTCGCAGCTT-ACCCTGT-GAAGGAT----AAAC-----AGTGAGC CCAAC  
 Ecna ACC-ACCGTCGTAGCTT-ACCCTGT-GAAGGCCT---AAT-----AGTAAGC AAAAT  
 Cohi ACC-GCCGTCGCAGCTT-ACCCTTT-GAAGGAC---TAAC-----AGTAAGC ACAAT  
 Caar ACC-ACCGTCGCAGCTT-ACCCTGT-GAAGGCCT---AAT-----AGTAAGC ACAAT  
 Came ACC-ACCGTCGCAGCTT-ACCCTGT-GAAGG-AC---TAAT-----AGTAAGC ACAAT  
 Mema ACC-ACCGTCGTAGCTT-ACCCTGT-GAAGGC--C--TAAT-----AGTAAGC AAAAT  
 Lenu ACC-GCCGTCGTAGCTT-ACCCTGT-AAAGGCC---CAT-----AGTAAGC AAAAT  
 Plma ACC-GCCGTCGTAGCTT-ACCCTGT-GAAGG-TT---TAAT-----AGTAAGC AAAAT  
 Emst ACC-ACCGTCGTAGCTT-ACCCTGT-GAAGGCCTT----AT-----AGTAAGC AAAAT  
 Ptti ACC-ACCGTCGTAGCTT-ACCCTGT-GAAGGACTC----AT-----AGTAAGC AAGAT  
 Losu ACC-ACCGTCGTAGCTT-ACTCTGT-GAAGAGC---CCGT-----AGTAAGC GAAAT  
 Geoy ACC-GCCGTCGTAGCTT-ATCCCGT-GAAGG-TC---TAGT-----ATTTAGC TTAAT  
 Dipi ACC-ACCGTCGTAGCTT-ACCCTGT-GAAGGCC---AAC-----AGTAAGC AGAAT  
 Pama ACC-ACCGTCGCAGCTT-ACCCTGT-GAAGG-GT---AAAA-----AGTAAGC GAAAT  
 Leob ACC-ACCGTCGTAGCTT-ACCCTCT-GAAGGTC---TAAT-----AGTAAGC ACAAT  
 Neba ACC-GCCGTCGTAGCTT-ACCCTGT--AAGGTC---CACCACAAAAAGTAGGC GCAAT  
 Pdpi ACC-GCCGTCGTAGCTT-ACCCTGT-GAAGGAG-A--TAAA-----AGTGAGC AAAAT  
 Nimi ACC-GCCGTCGTAGCTT-ACCTTGT-GAAGGAC---TAAT-----AGTAAGC GAAAT  
 Uptr ACC-GCCGTCGCAGCCT-ACCCTGT-GAAGG-AA---CCAT-----AGTGGGC CATAC  
 Pesc ACC-GCCGTCGTAGCTA-ACCCTGT-GAAGGTC---TAGC-----AGTAAGC AAGAT  
 Baar ACC-GCCGTCGCAGCTT-ACCCTGT-GAAGGACT---AAT-----AGTGAGC AGAAT  
 Moar ACC-ACCGTCGTAGCTT-ACCCTAT-GAAGGCC---TAT-----AGTAAGC AAAAT  
 Toja ACC-ACCGTCGTAGCTT-ACCCTGT-GAAGGCC---TAGT-----AGTGAGC AGGCT  
 Chau ACC-ACCGTCGCAGCTT-ACCCTGT-GAAGGCC---CAAT-----AGTAAGC ACAAT  
 Chse ACC-ACCGTCGCAGCTT-ACCCTGT-GAAGGTCT---AAC-----AGTAAAC ACAAT  
 Enar ACC-GCCGTCGTAGCTT-ACCCTGT-GAAGGAAC---TA-T-----AGTAAGC AAGAT  
 Hpty ACC-GCCGTCGTAGCTT-ACCCTGT-GAAGGCC---CAAT-----AGTAAGC TAAAT  
 Nana ACC-GCCGTCGTAGCTT-ACCCTGT-GAAGGTCT---AA-A-----AGTAAGC AGAAT  
 Mcst ACC-GCCGTCGTAGCTT-ACCCTGT-GAAGGAC---CCAT-----AGTAAGC AAAAT  
 Rhox ACC-GCCGTCGCAGCTT-ACCCTAT-GAAGGAC---CCAC-----AGTAAGC AAAAT  
 Opfa ACC-GCCGTCGTAGCTT-ACCCTGT-GAAGGCCT---AAT-----AGTAAGC AAAAT  
 Paar ATC-TCCGTCGCAGCTT-ACCCTGT-GAAGGCTCAT---AA-----AGTAAGT CAAAC  
 Gozo ACC-GCCGTCGTAGCTT-ACCCTGT-GAAGGTTA---TGT-----AGTAAGC AAAAT  
 Ackr ACC-ACCGTCGTAGCTT-ACCCTGT-GAAGG-CC---TACT-----AGTAAGC GAAAT  
 Elev ACC-ACCGTCGTAGCTT-ACCCTAT-GAAGGATT---AAC-----AGTAAGC AAGAC  
 Trdu ACC-GCCGTCGTAGCTT-ACCCTAT-GAAGGAG---CCAC-----AGTAAGC AAAAC  
 Amoc ACC-GCCGTCGTAGCCT-ACCCTGT-GAAGGACT---AG-A-----AGTGAGC AAGAT  
 Hame ACC-GCCGTCGTAGCTT-ACTCTGT-GAAGACCC---AT-----AGTAGGC ACAAT  
 Chso ACC-GCCGTCCTCAGTCT-ACCCTGT-AAAGGACCC---AT-----AGTAGGC GTAAT  
 Lyto ACC-GCCGTCGTAGCTT-ACCCTGT-GAAGGTC-T---AAT-----AGTAAGC AAAAC  
 Encr ACC-GCCGTCGTAGCTT-ACCCTGT-GAAGGCCA---AAT-----AGTAAGC AAAAC

|      |               |        |        |       |         |       |      |       |         |        |
|------|---------------|--------|--------|-------|---------|-------|------|-------|---------|--------|
| Bvar | ACC-ACCGTCGT  | AAGCTG | -ACCCT | GT-GA | AGCAA   | ----  | TTAT | ----- | AGTAAGC | TTAAC  |
| Noco | ACC-GCCGTCGT  | CAGCCC | -ACCCT | AT-GA | AGGTTT  | ---   | AA-A | ----- | AGTAGGC | TAAAT  |
| Chsp | ACC-GCCGTCAT  | CAGCCT | -ACCCT | GT-GA | AGGC    | --C-- | TAAT | ----- | AGTGGGC | ATAAC  |
| Arja | ACC-GCCGTCGT  | CAGCTT | -ACCCT | GT-GA | AGG     | -TC-- | TAAT | ----- | AGTAAGC | AAAAAC |
| Pase | ACC-GCCGTCGT  | AAGCCC | -ACCCT | GT-GA | AGGAC   | ----  | TAGT | ----- | AGTGGGC | TCAAC  |
| Trel | ACC-ACCGTCGT  | CAGCTC | -ACACT | CT-GA | AGCAAC  | ----  | AAA  | ----- | AGTGAGC | GAAAT  |
| Lifa | ACC-ACCGTCGC  | CAGCCC | -ACCCC | GT-GA | GGGAATA | ----  | AC   | ----- | AGTAGGC | TAGAC  |
| Acur | ACC-TCCGTCGT  | AAGCTT | -ACCCT | GT-GA | AGGACT  | ----  | AAT  | ----- | AGTAAGC | TCAAC  |
| Ampe | ACC-GCCGTCGT  | CAGCTT | -ACCCT | GT-GA | AGGAA   | ----  | GAAT | ----- | AGTAAGC | ATAAT  |
| Urja | ACC-GCCGTCGT  | CAGCTT | -ACCCT | AT-GA | AGG     | -AC-- | GAAC | ----- | AGTGAGC | ACAAC  |
| Enet | ACC-GCCGTCGT  | CAGCTT | -ACCCC | CT-GA | GGGT    | ----  | CCAC | ----- | AGTAAGC | AAGAT  |
| Ptbr | ACC-GCCGTCGT  | CAGCTC | -ACCCT | GT-GA | AGGTC   | ----  | TTAA | ----- | AGTAAGC | ATAAT  |
| Safa | ACC-GCCGTCGT  | CAGCTT | -ACCCT | AT-GA | AGGACA  | ---   | AA-C | ----- | AGTAAGC | AGAAT  |
| Icae | ACC-GCCGTCGT  | CAGCTT | -ACCCT | GT-GA | GGGTT   | ----  | TAAT | ----- | AGTAAGC | AAAAAT |
| Asmi | ACC-GCCGTCGT  | CAGTTC | -ACCCT | AT-GA | AGGCT   | ----  | TAAT | ----- | AGTGAGC | ACAAT  |
| Foal | ACC-TCCGTCCTC | CAGCTT | -ACCCT | GT-GA | AGGATT  | ---   | AA-T | ----- | AGTAAGC | ACAAC  |
| Drze | ACC-GCCGTCGC  | CAGCTT | -ACCCT | GT-GA | GAG     | -AC-- | GAAT | ----- | AGTAAGC | ACAAT  |
| Rhas | ACC-ACCGTCGT  | CAGCTT | -ACCCT | AT-GA | AGGCCTT | ----  | AT   | ----- | AGTAAGC | AAAAAC |
| Elac | ACC-GCCGTCGT  | CAGCCT | -ACCCT | AT-GA | AGGAC   | ----  | ATAA | ----- | AGTAAGC | AAAAAT |
| Kugu | ACC-TCCGTCCTC | CAGCTT | -ACCCT | GT-GA | AGGTCC  | ----  | AAT  | ----- | AGTAGGC | ACAAC  |
| Plor | ACC-GCCGTCGT  | CAGCCT | -ACCCT | GT-GA | AGGTC   | ----  | TAAT | ----- | AGTAAGC | AAAAAT |
| Sgun | ACC-ACCGTCGT  | CAGCTT | -ACCCT | GC-GA | AGACC   | ----  | AAT  | ----- | AGTAAGC | ACAAT  |
| Zaco | ACC-ACCGTCGT  | CAGCTT | -ACCCT | GT-GA | AGGCCT  | ----  | CAT  | ----- | AGTAAGC | AAGAT  |
| Zbfl | ACC-ACCGTCGT  | CAGCTT | -ACCCT | GT-GA | AGGTTA  | ---   | AAAC | ----- | AGTAAGC | AAAAAT |
| Spba | ACC-GCCGTCGT  | CAGCTT | -ACCCT | GT-GA | AGGCC   | ----  | AAT  | ----- | AGTAAGC | ACAAT  |
| Game | ACC-GCCGTCGT  | CAGCTT | -ACCCT | GT-GA | AGG     | -TC-- | TAAT | ----- | AGTAAGC | AAAAAT |
| Thth | ACC-GCCGTCGT  | CAGCTT | -ACCCT | GT-GA | AGGTCTA | ----  | AT   | ----- | AGTAAGC | AAAAAT |
| Xigl | ACC-ACCGTCGT  | CAGCTT | -ACCCT | GT-GA | AGGCC   | ----  | TAAT | ----- | AGTAAGC | AGAAT  |
| Hyja | ACC-GCCGTCGT  | AAGCTT | -ACCCT | GT-GA | AGGAAAT | --    | ATAT | ----- | AGTAAGC | AAAAAT |
| Psan | ACC-GCCGTCGT  | AAGCTT | -ACCCT | CT-GA | GGGGAAT | --    | TTGT | ----- | AGTAAGC | ACAAT  |
| Cupa | ACC-GCCGTCGT  | CAGCTT | -ACCCT | GT-GA | GGGTTTA | ----  | AC   | ----- | AGTAAGC | AAAAAT |
| Mpch | ACC-GCCGTCGT  | CAGCTT | -ACCCT | GT-GA | AGGATC  | ----  | AAC  | ----- | AGTAAGC | AAAAA  |
| Char | ACC-GCCGTCGT  | CAGCTT | -ACCCT | AT-GA | AGGTC   | -T--  | AAT  | ----- | AGTAAGC | AAAAAT |
| Pser | ACC-ACCGTCGT  | CAGCTC | -ACCCT | GT-GA | AGGATTA | ----  | AT   | ----- | AGTGAGC | AAAGT  |
| Prol | ACC-ACCGTCGT  | CAGCTT | -ACCCT | GT-GA | AGG     | -CT-- | TAAC | ----- | AGTAAGC | AAAGT  |
| Plbi | ACC-ACCGTCGT  | CAGCTT | -ACCCT | GT-GA | AGGAT   | ----  | TTAC | ----- | AGTAAGC | AAAAAT |
| Calu | ACC-GCCGTCGT  | CAGCTT | -ACACT | GA-GA | AGGATA  | ----  | AA   | ----- | AGTAAGC | AAAAAC |
| Papa | ACC-TCCGTCGC  | AAGCTT | -ACCCT | AGCAA | AGGTT   | ----  | CAGT | ----- | AGTAAGC | AATAA  |
| Sufr | ACC-GCCGTCGT  | CAGCTT | -ATCCT | GT-GA | AGGCT   | ----  | TCTT | ----- | AATGAGC | AAAAAT |
| Stci | ACC-GCCGTCGT  | CAGCTT | -ACCCT | AT-GA | AGGAA   | ----  | CAAC | ----- | AGTTAGC | AGAAT  |
| Taru | ACC-ACCGTCGT  | CAGCCT | -ACCCT | GT-GA | AGG     | GC--- | AAAT | ----- | AGTAGAC | AAAAAT |
| Rala | ACC-ACCGCCGT  | CAGCTT | -ACCCT | GT-GA | AGGCA   | ----  | CAAT | ----- | AGTAAGC | AAAAAT |

\* \* \* \* \*

|      | 37'  | HVR        | 137'  | 35'    | 34' |                           |       |         |     |
|------|------|------------|-------|--------|-----|---------------------------|-------|---------|-----|
| Scca | G-AA | TTAA----   | AC    | TCC--- | TAA | ACGTCAGGTCGAGGTGTAGC      | GA-AT | GAAGTGC | A-A |
| Muma | G-AA | TT----     | AAAC  | TCC--- | AAA | ACGTCAGGTCGAGGTGTAGC      | AA-AT | GAAGTGC | G-A |
| Erca | A-AG | TA-----    | AAA   | CTT--- | AAC | ACGTCAGGTCAGGTCGAGGTGTAGC | TT-AT | GATATGC | G-A |
| Pose | A-AG | TAA-----   | AA    | CTT--- | AAT | ACGTCAGGTCAGGTCGAGGTGTAGC | TT-AT | GATGTGC | G-A |
| Actr | T-GG | CA----     | CACC  | CAA--- | AA  | ACGTCAGGTCGAGGTGTAGC      | GA-AT | GAAGTGC | A-A |
| Scal | T-GG | CA-----    | CAC   | CCA--- | AAA | ACGTCAGGTCGAGGTGTAGC      | GA-AT | GAAGTGC | A-A |
| Posp | T-GG | CA----     | CAC   | CCA--- | AAA | ACGTCAGGTCGAGGTGTAGC      | GA-AT | GAAGTGC | A-A |
| Atsp | G-GG | AA-----    | CAC   | CCC--- | AAA | ACGTCAGGTCGAGGTGTAGC      | GT-AC | GAAGTGC | G-A |
| Leoc | G-GG | GACA----   | CCC   | ---    | AAA | ACGTCAGGTCGAGGTGTAGC      | GT-AT | GAAGTGC | A-A |
| Amca | G-AA | CT-CA----  | CTT   | A---   | AAA | ACGTCAGGTCGAGGTGTAGC      | GT-AT | GGAGTGC | A-A |
| Osbi | G-GC | CTTCG----  | CCC   | ---    | AGA | ACGTCAGGTCGAGGTGTAGC      | AA-AT | AAAACGC | G-A |
| Pabu | G-AT | TAAAA----- | CTC   | ---    | AGC | ACGTCAGGTCGAGGTGTAGC      | GA-AT | GGAGCCG | G-A |
| Hial | G-GG | TA-CA----  | ACC   | ---    | AGA | ACGTCAGGTCGAGGTGTAGC      | GT-AT | GAGGTGC | G-A |
| Elha | G-AG | CA-----    | CAG   | CTC--- | AAA | ACGTCAGGTCGAGGTGTAGC      | GA-AT | GGGTTGC | G-A |
| Mlcy | G-AG | CA-----    | TAA   | CTC--- | AAA | ACGTCAGGTCGAGGTGTAGC      | GC-AC | GAAGCCG | G-A |
| Algl | G-GG | TAGA----   | GCC   | ---    | AGA | ACGTCAGGTCGAGGTGTAGC      | TA-AT | GGGTTGC | G-A |
| Ptgi | G-GG | TA----     | AAT   | CCC--- | AAA | ACGTCAGGTCGAGGTGTAGC      | GA-AT | GGGTTGC | G-A |
| Alaf | G-AG | AATCA---   | TCC   | ---    | AAA | ACGTCAGGTCGAGGTGTAGC      | GA-AT | GGGTTGC | G-A |
| Nock | G-GG | AA-----    | CAT   | CCC--- | AGA | ACGTCAGGTCGAGGTGTAGC      | GA-AT | GAAGTGC | G-A |
| Anja | G-GG | TT-----    | CTG   | CCC--- | AAA | ACGTCAGGTCGAGGTGTAGC      | GA-AT | GAGATGC | A-A |
| Gyki | G-GG | TAT-T----  | ACC   | ---    | AAC | ACGTCAGGTCGAGGTGTAGC      | GA-AT | GGAGGGC | G-A |
| Syka | G-GG | TCCCC----  | CCA   | ---    | TAA | ACGTCAGGTCGAGGTGTAGC      | GA-AC | GGAGTGC | G-A |
| Opma | G-GG | CCC----    | CCA   | CCC--- | AGC | ACGTCAGGTCGAGGTGTAGC      | GA-AC | GCAGTGC | G-A |
| Comy | G-GG | TTTT-----  | ACC   | ---    | AGA | ACGTCAGGTCGAGGTGTAGT      | TA-AT | GAAGTGC | G-A |
| Sasp | T-AA | TA-----    | AA    | TTA--- | AAA | ACGTCAGGTCAGGTCGAGGTGTAGC | GG-AT | AAAAAGC | A-A |
| Eupe | G-AG | TAAAA----- | CTC   | ---    | AAA | ACGTCAGGTCAGGTCGAGGTGTAGC | GT-AT | GAGGAGC | A-A |
| Enja | G-GA | GAC-----   | TCT   | TCC--- | AAA | ACGTCAGGTCGAGGTGTAGC      | AC-AC | GGAGTGC | G-A |
| Same | G-AG | CA----     | TTG   | CTC--- | AAA | ACGTCAGGTCGAGGTGTAGC      | GT-AC | GAAGTGC | G-A |
| Chch | G-AG | CAA----    | G-AC  | TCT--- | AAA | ACGTCAGGTCGAGGTGTAGC      | GC-AT | GAAGTGC | G-A |
| Grgr | G-GG | CACAG----  | CCC   | ---    | AGA | ACGTCAGGTCGAGGTGTAGC      | GT-AC | GGGTTGC | G-A |
| Caau | G-GG | TA-----    | CAA   | CCC--- | AAA | ACGTCAGGTCGAGGTGTAGC      | GC-AT | GAAGTGC | G-A |
| Cyca | G-GG | CA----     | CAA   | CCC--- | AAA | ACGTCAGGTCGAGGTGTAGC      | GC-AT | GAAGTGC | G-A |
| Dare | G-GG | CATA-----  | GCC   | ---    | AGA | ACGTCAGGTCGAGGTGTAGC      | AC-AT | AAAAAGC | G-A |
| Cost | G-GA | CACA----   | ATC   | ---    | AAA | ACGTCAGGTCGAGGTGTAGC      | GA-AC | GAAGTGC | G-A |
| Leec | G-GA | T-AC----   | ATC   | ---    | AAA | ACGTCAGGTCGAGGTGTAGC      | GA-AC | GAAGTGC | G-A |
| CrIa | G-GG | CA----     | CAA   | CCC--- | AAA | ACGTCAGGTCGAGGTGTAGC      | GT-AC | GAAGTGC | G-A |
| Clmc | G-GG | TA-CA----  | TCC   | ---    | AAA | ACGTCAGGTCGAGGTGTAGC      | TC-AC | GAGGTGC | A-A |
| Phin | G-GG | CACA-----  | GCC   | ---    | AAA | ACGTCAGGTCGAGGTGTAGC      | TT-AC | GAGATGC | A-A |
| Icpu | G-GG | C-----     | CCGC  | CCA--- | AAA | ACGTCAGGTCGAGGTGTAGC      | GT-AC | GAAGTGC | G-A |
| Psto | G-GG | C-----     | CCGC  | CCA--- | AAA | ACGTCAGGTCGAGGTGTAGC      | GT-AC | GAAGTGC | G-A |
| Cora | G-GA | CAAAA----  | CCA   | ---    | AA  | ACGTCAGGTCGAGGTGTAGC      | GC-AC | GAAGTGC | G-A |
| Eisp | G-GG | CAC-----   | AGC   | CCC--- | AAA | ACGTCAGGTCGAGGTGTAGC      | GT-AC | GAGATGC | G-A |
| Apal | G-GG | CACA----   | ACC   | ---    | AAA | ACGTCAGGTCGAGGTGCAGC      | AC-AT | GGGTTGC | G-A |
| Eslu | G-GG | TAAA-----  | ACC   | ---    | AGA | ACGTCAGGTCGAGGTGTAGC      | GC-AT | GAGCTGC | G-A |
| Dape | G-GG | CAA----    | A-ACC | ---    | AAA | ACGTCAGGTCGAGGTGTAGC      | GC-AT | GGGGCCG | G-A |
| Glse | G-GA | TA-----    | TAA   | CCC--- | AAA | ACGTCAGGTCGAGGTGTAGC      | AN-AT | GGGTTGC | G-A |
| Naar | G-GG | -TAAA----  | ACC   | ---    | TAA | ACGTCAGGTCGAGGTGTAGC      | GT-AT | GGGTTGC | G-A |
| Baoc | G-GG | CAG----    | ACC   | ---    | CGA | ACGTCAGGTCGAGGTGTAGC      | GC-AT | GAGGTGC | G-A |
| Opso | G-AG | TA-----    | CAA   | CCC--- | CAA | ACGTCAGGTCGAGGTGTAGC      | GC-AT | GAGGTGC | G-A |
| Alte | G-GA | C-----     | AAAA  | CCC--- | AGA | ACGTCAGGTCGAGGTGTAGC      | GT-AC | GGGTTGC | A-A |
| Plap | G-GG | TAA-----   | ACC   | ---    | AGA | ACGTCAGGTCGAGGTGTAGC      | GT-AC | GGGTTGC | G-A |

Plal G-**GC**CA-----AAG**CCC**---AAA**ACGTCAGGTCAAGGTGCAGC**GT-AT**GGGGTGC**G-A  
 Sami G-**GC**TACA-----A**CCC**---AAA**ACGTCAGGTCAAGGTGCAGC**GT-AT**GAGGTGC**G-A  
 Rere G-**GA**CATA-----A**CCC**---AGA**ACGTCAGGTCAAGGTGCAGC**GT-AT**GGGGTGC**G-A  
 Gama G-**GC**TAGAG-----**CCC**---AAA**ACGTCAGGTCAAGGTGTAGC**GT-AT**GAGGAGC**G-A  
 Onmy G-**GC**CAA-A-----A**CC**---AAA**ACGTCAGGTCAAGGTGTAGC**GC-AT**GAGGTGC**G-A  
 Sasa G-**GC**CA-AA-----A**CCC**---AAA**ACGTCAGTCCGAGGTGTAGC**GC-AT**GGGGTGC**G-A  
 Cola G-**GC**CA-----TGA**CCC**---AAA**ACGTCAGGTCAAGGTGTAGC**GC-AT**GGGGTGC**G-A  
 Dita G-**GC**CA-----CAG**CCC**---GGA**ACGTCAGGTCAAGGTGTAGC**GT-AT**GGGGTGC**A-A  
 Gogr A-**GC**CAC-----AA**CC**T---AAA**ACGTCAGGTCAAGGTGTAGC**GC-AC**GCAGTGC**A-A  
 Chsl G-**GC**CA-----CAG**CCC**---AGA**ACGTCAGGTCAAGGTGCAGC**AT-AC**GAGGTGC**G-A  
 Atja T-**AC**CA-----TCG**CTC**---AAT**ACGTCAGGTCAAGGTGTAGC**AT-AT**GAGGTGC**G-A  
 Iido T-**AC**CATC-----G**CTC**---AAT**ACGTCAGGTCAAGGTGTAGC**AT-AT**GAGGTGC**G-A  
 Auja G-**GC**CA-----CAG**CCC**---AAA**ACGTCAGGTCAAGGTGTAGC**GT-AT**GAAGTGC**G-A  
 Chag A-**GC**TA-----CCC-**CC**T---ATT**ACCGCAGGTCAAGGTGCAGC**GC-AT**GAGATGC**A-A  
 Hami A-**AA**TA-CT----T**CT**T---AAA**ACGTCAGGTCAAGGTGTAGC**GA-AT**AAAATGC**G-A  
 Saun A-**AC**AACT-----T**CT**T---AAA**ACGTCAGGTCAAGGTGTAGC**GA-AT**GAAGTGC**G-A  
 Nema T-**GC**CACAG---C**CC**A---AA**ACGTCAGGTCAAGGTGTAGC**GT-AC**GAAGTGC**GGA  
 Disp T-**GC**CA----CACC**CCC**---AAA**ACGTCAGGTCAAGGTGCAGC**GC-AC**GAAGTGT**GGA  
 Myaf T-**GC**CAC-A---G**CCC**---AAA**ACGTCAGGTCAAGGTGTAGC**GC-AC**GAAGTGC**C-A  
 Lagu T-**GA**TAC-----AA**CC**A---AAA**ACGTCAGGTCAAGGTGTAGC**GC-AT**GGGGTGC**G-A  
 Trtr T-**GC**TAAAG---C**CT**A---AA**ACGTCAGGTCAAGGTGTAGC**GC-AT**GAGACGC**T--  
 Zucr T-**GC**TAAA-----G**CC**T---AAA**ACGTCAGGTCAAGGTGTAGC**GC-AT**GAGAAGC**T--  
 Pxja T-**GC**TA-----AAA**CCC**---AAA**ACGTCAGGTCAAGGTGTAGC**GT-AT**GAGGTGC**G-A  
 Pxlo T-**GC**TAG-----AA**CCC**---AAA**ACGTCAGGTCAAGGTGTAGC**GT-AT**GAGGTGC**G-A  
 Pctr T-**GC**C-AA----AC**CCC**---AAA**ACGTCAGGTCAAGGTGTAGC**GT-AT**GAGGTGC**G-A  
 Apsa T-**AC**CACAG---C**CC**A---AA-**ACG**CC**AGGTCAAGGTGTAGC**GC-AT**AAGGGGC**G-A  
 Cabe T-**GC**CACC-----G**CCC**---AAA**ACGTCAGGTCAAGGTGTAGC**CA-AT**GGAGAGC**G-A  
 Bzze T-**GC**TATAA----C**CC**---AAA**ACGTCAGGTCAAGGTGTAGC**GT-AT**GGAGAGC**G-A  
 Siim T-**GC**CA-CA----G**CCC**---AGT**ACGTCAGGTCAAGGTGTAGC**CT-AT**GTAGGGC**G-A  
 Ctru T-**GC**CA-----AAA**CCC**---AAA**ACGTCAGGTCAAGGTGTAGC**GC-AT**GAAGGGC**G-A  
 Dpbr T-**GC**CA-----AAA**CCC**---AAA**ACGTCAGGTCAAGGTGTAGC**GC-AT**GAAGGGC**G-A  
 Caki T-**AC**TAA-T----A**CT**A---AAG**ACGTCAGGTCAAGGTGTAGC**GT-AT**GGGATGC**G-A  
 Phja T-**GA**TATAA---A**CT**CA---AAA**ACGTCAGGTCCAGTGCAGC**GA-AT**GAGGTGC**G-A  
 Brsp A-**AC**CTA---TT**CT**A---AAG**ACGTCAGGTCAAGGTGTAGC**GT-AT**GGGAAGC**G-A  
 Gamo A-**TC**CAA-A---G**CC**A---AAA**ACGTCAGGTCAAGGTGTAGC**GT-AT**GGGATGC**G-A  
 Lolo T-**GC**CAA----A-G**CC**A---AAA**ACGTCAGGTCAAGGTGTAGC**GA-AT**GGGATGC**G-A  
 Batr AT**AC**CA-----TAG**CCC**---AAC**ACCGCAGGTCAAGGTGTAGC**CA-AT**GAAGGGC**G-A  
 Prmy TT**AA**TA----CT**CCCT**T---AAA**ACGTCAGGTCAAGGCGTAGC**CA-AT**AAAAGGC**C-G  
 Loli T-**GT**TT-----TAA**CCC**---AAA**ACGTCAGGTCAAGGTGTAGC**TA-AT**GGGAGGC**G-A  
 Loam T-**GC**CACAC-----**CCC**---ACA**ACGTCAGTGTCAAGGTGTGTC**CT-AT**GAAGGGC**G-A  
 Chab T-**GC**CA----CAG-**CC**C---AAA**ACGTCAGGTCAAGGTGTAGC**GT-AT**AAAAGGC**G-A  
 Chto T-**GC**CA----CAG-**CC**C---AAA**ACGTCAGGTCAAGGTGTAGC**GT-AT**GAGAGGC**G-A  
 Majo T-**GC**T-----AACA**CCC**---CAA**ACGTCAGGTCAAGGTGTAGC**AT-AT**GGAGGGC**G-A  
 Hlst T-**GC**-CCCA---C**CCC**---AAC**ACGTCAGGTCAAGGTGTAGC**GC-AT**GAGAGGC**G-A  
 Clpe T-**GC**CAG--AC**CCC****CCC**---AAT**ACGTCAGGTCAAGGTGCAGC**TG-AT**GGAAAGC**A-A  
 Mlmr A-**GC**CAA----C**CC****CCC**---C**CC****ACGTCAGGTCAAGGTGCAGC**GA-AT**AAAAGGC**A--  
 Crcr C-**GC**TAGAA-----**CC**C---AAA**ACGTCAGGTCAAGGTGTAGC**GT-AT**GAGAGGC**G-A  
 Muce C-**GC**TAGAA-----**CC**C---AAA**ACGTCAGGTCAAGGTGTAGC**GT-AT**GAGAGGC**G-A  
 Bege T-**AC**TA-----TAA**CCC**---AAA**ACGTCAGGTCAAGGTGTAGC**GC-AT**GGCAGGC**G-A  
 Mela C-**AC**TACAA-----**CTC**---AAA**ACGTCAGGTCAAGGTGTAGC**AT-AT**GAGGGGC**G-A  
 Hats C-**AC**TA-----CAA**CTC**---AAA**ACGTCAGGTCAAGGTGTAGT**AC-AT**GGGAGGC**G-A  
 Orla C-**AC**TA-----ACA**CTC**---AAA**ACGTCAGGTCAAGGTGTAGC**AT-AT**GAGAGGC**G-A

Cosa C-AGTA-----AAACTC---AAAACGCCAGGTCGAGGTGTAGCGC-ATGAGAGGCG-A  
Exsp C-AGTA-----AAACTT---AAAACGCCAGGTCGAGGTGTAGCAT-ATGAGAGGCG-A  
Depa C-AGTA-----AAACTA---AAAACGTCAGGTCGAGGTGTAGCAT-ATGAAAGGCG-A  
Rima T-GGTTCA-----GCC---AAAACGTCAGGTCGAGGTGTAGCAT-ATGAGAAGCA-A  
Fuol T-GGTA-----AAACC---AAAACGCCAGGTCAGGTGTAGCAT-ATGAGAGGCA-A  
Gmaf T-GGTA-----AAACC---AAAACGCCAGGTCGAGGTGTAGCAT-ACGAAAAGCA-A  
Xeei T-GGTT-----TAAACC---AAAACGTCAGGTCGAGGTGTAGCAT-ATGAGAAGCA-A  
Pros T-GACAAAC-----CCC---AAGACGTCAGGTCGAGGTGTAGCGC-ATGAGGAGCG-A  
Scmi T-GAT-AA-----AAACC---AAGACGTCAGGTCGAGGTGTAGCGT-ATGAGGAGCG-A  
Rolo T-GTT-----AAAAACC---AAAACGTCAGGTCGAGGTGTAGCGC-ATGGGGCCG-A  
Cere T-GATAAAA-----TCC---GAAACGTCAGGTCAGGTGTAGCAT-ATGGGAGGCA-A  
Daga T-GATA-----AAATCC---AAAACGTCAGGTCAGGTGTAGCAT-ACGGGAGCG-A  
Anco T-GGTACAA-----CCC---AAAACGTCAGGTCGAGGTGTAGCGT-ATGAGATGCG-A  
Dmve T-GGCA-----TAAACC---CAAACGTCAGGTCGAGGTGTAGCGC-ATGAGAGGCG-A  
Dmar C-AGCA-----TAGCCC---AACACGTCAGGTCGAGGTGTAGCGT-ATGAGAGGCA-A  
Anka T-GGCA-----CAGCCT---AAAACGTCAGGTCGAGGTGTAGCGTTATGAGATGCG-A  
Moja T-GGCA-----CAGCCC---AAAACGTCAGGTCGAGGTGTAGCGT-ATGAGATGCG-A  
Hoja T-GGCACAG-----CCC---AAAACGTCAGGTCGAGGTGTAGCGT-ATGAGATGCG-A  
Bede T-GGTAAAA-----CCC---AAAACGTCAGGTCGAGGTGTAGCGC-ATGGGAGGCG-A  
Besp T-GGTA-----AAACC---AAAACGTCAGGTCGAGGTGTAGCGC-ATGGGAGGCG-A  
Mysp T-GATTT-----AAATCC---AAAACGTCAGGTCGAGGTGTAGCGC-ATGGAAAGCA-A  
Osja T-GATG-----TAAATCC---AAGACGTCAGGTCGAGGTGTAGCGC-ATGAAGAGCA-A  
Sgro T-GATT-----AAAAACC---AAGACGTCAGGTCGAGGTGTAGCGC-ATGGAAAGCA-A  
Pzpa C-AGTA-----AAACTC---AAAACGTCAGGTCGAGGTGTAGCGA-ATGGGGGGCG-A  
Zeja T-AGTA-----ACACTC---AAAACGTCAGGTCGAGGTGTAGCGT-ATGGGGTGCA-A  
Zzne T-AGTA-----AGACTC---AAAACGTCAGGTCGAGGTGTAGCGA-ATGGGTTGCG-A  
Zefa T-AGTAA-----AACTC---AAAACGTCAGGTCGAGGTGTAGCGA-ATGAGCTGCG-A  
Acni T-AGTA-----AAACTC---AAAACGTCAGGTCGAGGTGTAGCGC-ATGAGGCCG-A  
Ncrh T-AGTAAAA-----CTC---AAAACGTCAGGTCGAGGTGTAGCGC-ATGAGGCCG-A  
Agca T-GGTATA-----CCCC---AAAACGTCAGGTCGAGGTGTAGCGT-ATGGAAGGCA-A  
Hydy T-GGTAC-----AAACC---TAAACGTCAGGTCGAGGTGTAGCGT-ATGGAGAGCG-A  
Gzac T-GGTA-----TAAACC---TAAACGTCAGGTCGAGGTGTAGCGT-ATGTGGAGCG-A  
Pevo T-GGCACA-----ACCC---AAAACGTCAGGTCGAGGTGTAGCGT-ATGCAAGGCG-A  
Hiku T-AGTAACA-----ACCC---AAAACGTCAGGTCGAGGTGTAGTTT-ATGATAGGCG-A  
Inpa T-GGCA-----CAGCCC---AAAACGCCAGGTCAGGTGTAGCAT-ACGAGAAGCA-A  
Auch C-GATAACC-CTACTCC---AGATGACAGGTCGAGGCCGAGCTT-ATGAAAGGCGCT  
Fico T-GGCACA-----CCCC---AAAACGTCAGGTCGAGGTGTAGCGT-ATGAGAGGCG-A  
Mac3 T-GGCA-----AAGCCC---AAAACGTCAGGTCGAGGTGTAGCGT-ATGAGAGGCG-A  
Moal T-GGTCCCT-----CCCC---AAAACGTCAGGTCGAGGTGTAGCGA-ATGAGGGGCG-A  
Syma C-AGTA-----CAACTC---CAAACGTCAGGTCGAGGTGTAGCGC-ATGGGAGGCA-A  
Maf r T-GGTTC-----ATCCC---CAAACGTCAGGTCGAGGTGTAGCGC-ATGAGAAGCA-A  
Dcpe T-GGTAATG-----CCT---AAAACGTCAGGTCGAGGTGTAACGT-ATGAGAGGCGATA  
Dct i T-GGTAA-----TACCCT---AAAACGTCAGGTCGAGGTGTAACGT-ATGAGAGGCA-A  
Hehi T-GGCA-----AAACC---AAAACGTCAGGTCGAGGTGTAGCGC-ATGGAGGGCG-A  
Stam T-GGCACA-----GCC---AAAACGTCAGGTCGAGGTGTAGCGT-ATGGAAAGCG-A  
Hogi T-GGCA-----TAGCCC---AAAACGTCAGGTCGAGGTGTAGCGT-ATGGAAAGCG-A  
Erzo T-GGCA-----TAGCCC---TAAACGTCAGGTCGAGGTGTAGCGC-ATGGGAAGCG-A  
Hxot T-GGTA-----AAACCCT---AAAACGTCAGGTCGAGGTGTAGCGT-ATGGAAGGCG-A  
Core T-GGTACA-----ACCT---AAAACGTCAGGTCGAGGTGTAGCGT-ATGGAGGGCG-A  
Apve T-GGCACA-----ACCT---AAAACGTCAGGTCGAGGTGTAGCGT-ATGGAAGGCG-A  
Lat j T-AGCA-----TAGCCC---AGAACGTCAGGTCAGGTGTAGTAC-ATGAGGGGAGAA  
Laja T-GGCAGA-----GCC---AGAACGTCAGGTCGAGGTGTAGCGT-ATGGAGGGCG-A



Syja T-**GC**-CACA----G**CCC**---AAA**ACGTCAGGTCGAGGTGTAGC**GT-AT**GGAAGGC**G-A  
 Epme T-**GC**CA-----CAG**CCC**---AAA**ACGTCAGGTCGAGGTGTAGC**GT-AT**GGAAGGC**G-A  
 Grse C-**AG**TACAA-----**CTC**---AAA**ACGTCAGGTCGAGGTGTAGC**GC-AT**GGAAGGC**G-A  
 Clja T-**GC**TCC----TAG**CCC**---AGT**ACGTCAGGTCGAGGTGTAGC**TT-AT**GGAAGGC**G-A  
 Ogcy C-**AG**TAATA-----**CTC**---AAA**ACGCCAGGTCGAGGTGTAGC**TA-AC**AAGGGGC**G-A  
 Plna C-**AG**TTTA-----G**CTC**---AGT**ACGTCAGGTCGAGGTGCAGC**TT-AC**GAGAAGC**G-A  
 Lema T-**GC**CAC-A----G**CCC**---AGA**ACGTCAGGTCGAGGTGTAGC**GA-AT**GGAAGGC**G-A  
 Etzo T-**GC**TA-----CAG**CC**T---AAA**ACGTCAGGTCGAGGTGTAGC**GC-AT**GGGGAGC**G-A  
 Apse T-**GC**CA-TA----G**CCC**---AAA**ACGTCAGGTCGAGGTGTAGC**GT-AT**GAGAAGC**G-A  
 Epde T-**GC**CA-TA----G**CCC**---AAA**ACGTCAGGTCGAGGTGTAGC**GT-AT**GGAGGGC**G-A  
 Slja C-**GC**C-AT----TG**CCC**---AAT**ACGTCAGGTCGAGGTGTAGC**GA-AT**GAGGGGC**G-A  
 Bsja T-**GC**TACTG-----**CCC**---AAT**ACGTCAGGTCGAGGTGTAGC**GT-AT**GAAAGGC**G-A  
 Ecna T-**GC**T-----AAAA**CCC**---AGA**ACGTCAGGTCGAGGTGTAGT**GC-AT**GAGAGGC**G-A  
 Cohi T-**GC**TA-----CAA**CCC**---AAT**ACGTCAGGTCGAGGTGTAGC**CT-AT**GAGAAGC**G-A  
 Caar T-**GC**CA-----TAG**CCC**---AAA**ACGTCAGGTCGAGGTGTAGT**GC-AT**GGGAGGC**G-A  
 Came C-**GC**CA-----CAG**CCC**---AGA**ACGTCAGGTCGAGGTGTAGT**GA-AT**GGGAGGC**G-A  
 Mema T-**GC**CA-----TAG**CCC**---AAA**ACGTCAGGTCGAGGTGTAGC**GT-AT**GAGAGGC**G-A  
 Lenu T-**GC**CACAG-----**CCC**---TAA**ACGTCAGGTCGAGGTGTAGC**GA-AC**GAAAGGC**G-A  
 Plma T-**GC**CA-----CCA**CCC**---AGA**ACGTCAGGTCGAGGTGTAGC**GC-AT**GAGAGGC**G-A  
 Emst T-**GC**CACA-----G**CCC**---AAA**ACGTCAGGTCGAGGTGTAGC**GT-AT**GGAGGGC**G-A  
 Ptti T-**GC**CA-TA----G**CCC**---AAA**ACGTCAGGTCGAGGTGTAGC**GT-AT**GGAAGGC**G-A  
 Losu T-**GC**CA-----CAG**CCC**---AAG**ACGTCAGGTCGAGGTGTAGC**TT-AC**GAAGGGC**GCT  
 Geoy C-**GC**CA-----CAG**CCC**---CAA**ACGTCAGGTCGAGGTGTAGC**TA-AT**GGAGGGC**G-A  
 Dipi T-**GC**CACAC-----**CCC**---AAA**ACGTCAGGTCGAGGTGTAGC**GC-AT**GGAAGGC**G-A  
 Pama T-**GC**CAC-----T-G**CCC**---AAA**ACGTCAGGTCGAGGTGTAGC**GA-AT**GGAAGGC**G-A  
 Leob T-**GC**CA-----TAG**CCC**---AAA**ACGTCAGGTCGAGGTGTAGC**GC-AT**GAAAGGC**G-A  
 Neba T-**GC**TTTAC----C**CCC**---AGC**AAGTCAGGTCGAGGTGTAGC**GT-AT**GGAAGGC**G-A  
 Pdpi T-**GC**CA-----CTG**CCC**---AAA**ACGTCAGGTCGAGGTGTAGC**GA-AT**GAGAGGC**G-A  
 Nimi T-**GC**TAC-----AG**CCC**---TAA**ACGCCAGGTCGAGGTGTAGC**GT-AT**GGAGGGC**G-A  
 Uptr T-**GC**TA-----ATA**CCC**---CAA**ACGTCAGGTCGAGGTGTAGC**AT-AT**GGAGGGC**G-A  
 Pesc C-**GC**TA-----CAA**CCC**---AAA**ACGCCAGGTCGAGGTGTAGC**AT-AT**GAAGGGC**G-A  
 Baar T-**GC**CA-----CAG**CCC**---AAA**ACGTCAGGTCAGG**GTGTAGC GC-AT**GGAAGGC**G-A  
 Moar T-**GC**CA-----TAG**CCC**---AAA**ACGTCAGGTCGAGGTGTAGC**GT-AT**GGAAGGC**G-A  
 Toja C-**GC**CA-----TAG**CCC**---CAA**ACGTCAGGTCGAGGTGTAGT**GT-AT**GAGAGGC**A-A  
 Chau C-**GC**CAA-----TG**CCC**---AAA**ACGTCAGGTCGAGGTGTAGC**GA-AT**GGAAGGC**G-A  
 Chse C-**GC**C-----ACAG**CCC**---AGA**ACGTCAGGTCGAGGTGTAGC**GA-AT**GGAGGGC**G-A  
 Enar T-**GC**CA-----CAG**CC**T---AAA**ACGTCAGGTCGAGGTGTAGC**GT-AT**GGAAGGC**G-A  
 Hpty T-**GC**CA-----CAA**CCC**---AAA**ACGTCAGGTCGAGGTGTAGC**GT-AT**GGAGGGC**G-A  
 Nana T-**AG**CA-----TAG**CCC**---AAA**ACGTCAGGTCGAGGTGTAGC**GC-AT**GAGGGGC**G-A  
 Mcst T-**GC**C-AC----AA**CCC**---AAA**ACGTCAGGTCGAGGTGTAGC**GT-AT**GGTAGGC**G-A  
 Rhox T-**GC**CA-----CAG**CCC**---AGA**ACGTCAGGTCGACGTGTAGC**GT-AT**GGAAGGC**G-A  
 Opfa T-**GC**CATGG-----**CCC**---AAA**ACGTCAGGTCGACGTGTAGC**GT-AT**GGAGGGC**G-A  
 Paar C-**GC**TGAAAATTC**CCC**---CCA**ACGTCAGGTCGAGATGTAGC**TC-AT**GAAGAGC**G-A  
 Gozo T-**GC**CATAG-----**CCC**---AAA**ACGTCAGGTCGAGGTGTAGC**GC-AT**GGAAGGC**G-A  
 Ackr T-**GC**TAA-----A-G**CCC**---AGA**ACGTCAGGTCGAGGTGTAGC**GC-AT**GGAAGGC**G-A  
 Elev T-**GC**CACCA----G**CC**T---AAA**ACGTTAGGTCGAGGTGTAGT**GC-AT**GGAAGGC**G-A  
 Trdu T-**AG**CACAA-----**CTC**---AAA**ACGCCAGGTCGAGGTGTAGC**AT-AT**GAGAGGC**G-A  
 Amoc T-**GC**TA-----AGA**CCC**---AAA**ACGTCAGGTCGAGGTGTAGT**GT-AT**GAGAGGC**G-A  
 Hame C-**GC**CAC-A----G**CCC**---AAA**ACGCCAGGTCGAGGTGTAGC**GT-AT**GGAAGGC**G-A  
 Chso T-**GC**TT-----TAG**CCC**---CAG**ACGACAGGTCGAGGTGTAGC**GT-AT**GAAAAGC**G-A  
 Lyto T-**GC**CT-----TGG**CCC**---AGA**ACGTCAGGTCGAGGTGTAGC**GC-AT**GGGAGGC**G-A  
 Encr T-**GC**T-----AGAA**CCC**---AAA**ACGTCAGGTCGAGGTGTAGC**GT-AT**GGGAAGC**G-A

Bvar T-**GC**CAC-----AG**CCC**---AGA**ACGTCAGGTCGAGGTGTAGT**GT-AT**GGAAAGC**G-A  
 Noco T-**GC**CA-----TAG**CCC**---AGC**ACGTCAGGTCGAGGTGTAGC**GT-AT**GGAAAGC**G-A  
 Chsp T-**AC**CA-----CGC**CCC**---AAA**ATGTCAGGTCGAGGTGTAGC**GT-AT**AAGAGGC**G-A  
 Arja T-**GC**TAG-----A-**CC**T---AAA**ACGTCAGGTCGAGGTGTAGC**GT-AT**GGAGGGC**G-A  
 Pase C-**AC**CA-----TTG**CTT**---CAA**ACGTCAGGTCGAGGTGTAGC**CT-AT**GGAGAGC**G-A  
 Trel T-**GC**TACAA-----**CCC**---AGA**ACGTCAGGTCGAGGTGTAGC**CT-AC**GAGGGGC**G-A  
 Lifa T-**GA**ACATA-----T**CCC**---CGT**ATGTCAGGTCGAGGTGTAGC**TA-AT**GAAGGGC**G-A  
 Acur T-**GC**TAACG-----**CCC**---AAA**ACGTCAGGTCAGGTGCAGC**GT-AT**GAAGGGC**G-C  
 Ampe T-**GC**CAC-----AG**CCC**---AAA**ACGTCAGGTCGAGGTGTAGC**GC-AT**GGAGGGC**G-A  
 Urja C-**GC**CATT---CAA**CCC**---AAA**ACGTCAGGTCGAGGTGTAGC**GC-AC**GGAAGGC**G-A  
 Enet T-**AC**TAAA-----A**CT**C---AAA**ACGTCAGGTCGAGGTGTAAC**GT-AT**GGGAAGC**T-T  
 Ptbr C-**AC**AAATA-----C**CT**T---AAA**ACGTCAGGTCGAGGTGTAGC**AT-AT**GAAAGGC**C-A  
 Safa C-**AC**TA-----ATA**CT**C---AAA**ACGTCAGGTCGAGGTGTAGC**AA-AT**GAAAGAC**G-A  
 Icae T-**GC**CA-----CCA**CCC**---AGA**ACGTCAGGTCGAGGTGTAGC**GC-AT**GAGAGGC**G-A  
 Asmi C-**AC**CA----TAA-**CCC**---AAA**ACGTCAGGTCGAGGTGTAGT**AT-AT**GTGAGGC**G-A  
 Foal T-**GC**TT-----TCA**CCC**-CCTAA**ACGTCAGGTCGAGGTGCAGC**GC-AT**GAAAGGC**T-T  
 Drze T-**GC**TA-----AAA**CCC**---TAA**ACGTCAGGTCGAGGTGTAGC**GA-AT**GAGGGGC**A-A  
 Rhas T-**GC**CA-AA----G**CC**T---AAA**ACGTCAGGTCGAGGTGTAGC**GC-AT**GAAAGGC**G-A  
 Elac T-**GC**CA----CAG-**CCC**---AAA**ACGTCAGGTCGAGGTGTAGC**GA-AT**GAGAGGC**G-A  
 Kugu T-**GC**TAAA-----A**CCC**---AGA**ACGTCAGGTCAGGTGCAGC**TT-AT**GAAAGGC**A-A  
 Plor T-**GC**CAC-----AG**CCC**---AGA**ACGTCAGGTCGAGGTGTAGC**AT-AT**GGAAGGC**G-A  
 Sgun T-**GC**CACA-----G**CCC**---AAA**ACGTCAGGTCGAGGTGTAGC**GT-AT**GGAGGGC**G-A  
 Zaco T-**GC**CACA-----G**CCC**---AAA**ACGTCAGGTCGAGGTGTAGC**GC-AT**GGAAGGC**G-A  
 Zbfl T-**GC**CA-----TAG**CCC**---AAA**ACGTCAGGTCGAGGTGTAGC**GT-AT**GGAAGGC**G-A  
 Spba C-**GC**CA-----CAG**CCC**---AGT**ACGTCAGGTCGAGGTGTAGT**GT-AT**GAGAGGC**G-A  
 Game T-**GC**CA-----CCG**CCC**---AGA**ACGTCAGGTCGAGGTGTAGC**GC-AT**GAGAGGC**G-A  
 Thth T-**GC**CACC-----G**CCC**---AGA**ACGTCAGGTCGAGGTGTAGC**GC-AT**GAGAGGC**G-A  
 Xigl T-**GC**CAT-----AG**CCC**---AAA**ACGTCAGGTCGAGGTGTAGT**GC-AT**GAGAGGC**G-A  
 Hyja C-**GC**CA-----CTG**CCC**---AGA**ACGTCAGGTCGAGGTGTCCG**GC-AT**GAGAGGC**G-A  
 Psan C-**GC**CA-----CTG**CCC**---AGA**ACGTCAGGTCGAGGTGTCCG**GC-AT**GAGAGGC**G-A  
 Cupa T-**GC**CA-CC----A**CCC**---AGA**ACGTCAGGTCGAGGTGTAGC**GC-AT**GAGAGGC**G-A  
 Mpch T-**GC**CAAAG-----**CCC**---AAA**ACGTCAGGTCGAGGTGTAGC**GT-AT**GAGAGGC**G-A  
 Char T-**GC**CA-----CAG**CCC**---AAA**ACGTCAGGTCGAGGTGTAGC**GC-AT**GAGAGGC**G-A  
 Pser T-**GC**CAC-A----G**CCC**---AAA**ACGTCAGGTCGAGGTGTAGC**GT-AT**GAGAGGC**G-A  
 Prol T-**GC**CA-----AAG**CCC**---AAA**ACGTCAGGTCGAGGTGTAGT**GA-AT**GAGGGGC**G-A  
 Plbi T-**GC**CAC-----AG**CCC**---AAA**ACGTCAGGTCGAGGTGTAGT**GA-AT**GAGGGGC**G-A  
 Calu T-**AC**CA-AA----G**CCC**---AGA**ACGTCAGGTCGAGGTGCAGC**TC-AT**GGGAGGC**GCA  
 Papa C-**GA**TTTACG--TG**CCC**---CCA**ACGTCAGGTCAGGTGCAGC**CC-AC**GAGAGGC**G-A  
 Sufr T-**GC**CA-AA----G**CC**T---AGT**ACGTCAGGTCGAGGTGTAGC**GT-AC**GGAAAGC**G-A  
 Stci T-**GC**CA-----CAG**CCC**---AAA**ACGTCAGGTCGAGGTGTAGC**GT-AC**GGAAAGC**G-A  
 Taru T-**GC**C-AC----AG**CCA**---AAA**ACGTCAGGTCGAGGTGTAGC**GA-AT**GGAGGGC**G-A  
 Rala T-**GC**CA-----CAG**CCC**---AAA**ACGTCAGGTCGAGGTGTAGC**GT-AT**GGAAGGC**G-A

\* \* \*

|      | 32' | 38       | 38'   | 39   |            |      |                   |     |          |          |
|------|-----|----------|-------|------|------------|------|-------------------|-----|----------|----------|
| Scca | AGA | AATGGGCT | ACATT | TTTT | TA--C--C-- | AAAA | AAT--AC--GGACA--  | GTA | AACTGAAA |          |
| Muma | AGA | AATGGGCT | ACATT | TTTT | AC-----C-  | AAAA | ACAT-AC--GAATG--  | GTA | AATTGAAA |          |
| Erca | AGA | AATGGGCT | ACATT | TTCT | AG--A--CT- | AGAA | CAT--AC--GAACA--  | ACA | CTATGAAA |          |
| Pose | AGA | AATGGGCT | ACATT | TTCT | AG--A--TT- | AGAA | CAC--AC--GGACG--  | ACA | CTATGAAA |          |
| Actr | AGA | AATGGGCT | ACATT | TTCT | GACAC----- | AGAA | AATACAC--GAATA--  | ACA | CTGTGAAA |          |
| Scal | AGA | AATGGGCT | ACATT | TTCT | GAC-A---C- | AGAA | AATACAC--GAATA--  | ACA | CTGTGAAA |          |
| Posp | AGA | AATGGGCT | ACATT | TTCT | GACAC----- | AGAA | AACACAC--GAATA--  | ACA | CTGTGAAA |          |
| Atsp | AGA | AATGGGCT | ACATT | TTCT | ATAT-----C | AGAA | CA-TAAC--GAACA--  | ACA | CCATGAAA |          |
| Leoc | AGA | AATGGGCT | ACATT | TTCT | ATG---TC-  | AGAA | TAT-TAC--GAACA--  | ACA | CCATGAAA |          |
| Amca | AGA | AATGGGCT | ACATT | TTCT | AAC-T--AC- | AGAA | -TACTAC--GGATG--  | ATT | CTATGAAA |          |
| Osbi | AGA | AATGGGCT | ACATT | TTCT | GAACA---AC | AGAA | -CAT-AC--GAAC--   | A   | TAA      | TTATGAAA |
| Pabu | AGA | AATGGGCT | ACATT | TTCT | AACAC----- | AGAA | AA-C-AC--GGAT--   | A   | ATT      | CTATGAAA |
| Hial | AGA | AATGGGCT | ACATT | TTCT | GCAAG--AC- | AGAA | TATT-AC--GAACGA-- | CTA | CCATGAAA |          |
| Elha | AGA | AATGGGCT | ACATT | TTCT | GAAAC--C-  | AGAA | TACT-AC--GGATG--  | ACA | TAGTGAAA |          |
| Mlcy | AGA | AATGGGCT | ACATT | TTCT | AACC---CT- | AGAA | CATT-GC--GAACG--  | ACA | CAGTGAAA |          |
| Algl | AGA | AATGGGCT | ACATT | TTCT | GGT---TC-  | AGAA | TACT-AC--GGAT-A-  | ATC | CTTTGAAA |          |
| Ptgi | AGA | AATGGGCT | ACATT | TTCT | GACCC--AC- | AGAA | TATC-AC--GAATA--  | TTG | CTCTGAAA |          |
| Alaf | AGA | AATGGGCT | ACATT | TTCT | GACCA---TC | AGAA | -TATTAC--GAAAA--  | ATC | CCATGAAA |          |
| Nock | AGA | AATGGGCT | ACATT | TTCT | GGTT---TC- | AGAA | TATT-AC--GAAAT--  | ATG | TTATGAAA |          |
| Anja | TGA | AATGGGCT | ACATT | TTCT | GA-TA--C-- | AGAA | AAAC-AC--GAAAA--  | GTC | CCATGAAA |          |
| Gyki | AGA | GATGGGCT | ACATT | TTCT | GGC---AAC  | AGAA | -CACTAC--GAAGA--  | GCA | CAATGAAA |          |
| Syka | AGA | AATGGGCT | ACATT | TTCT | GCCCC----- | AGAA | TACT-AC--GGAA--   | A   | GTC      | TCATGAAA |
| Opma | AGA | GATGGGCT | ACATT | TTCT | GAAA---C-  | AGAA | CATT-AC--GAAAG--  | GTC | TCATGAAA |          |
| Comy | AGA | GATGGGCT | ACATT | TTCT | AAC---CC-  | AGAA | TATT-AC--GAAAA--  | GTA | TTATGAAA |          |
| Sasp | TGA | GATGGGCT | ACATT | TTCT | GACC---C-  | AGAA | AAC--AC--GAAAA--  | TAC | AAATGAAA |          |
| Eupe | TGA | GATGGGCT | ACATT | TTCT | GAACC----- | AGAA | AA-CTAC--GAAT--   | A   | GTA      | TAATGAAA |
| Enja | AGA | AATGGGCT | ACATT | GCCT | GACTT----- | AGGC | TACCAAC--GAAAA--  | GTC | GCCTGAAA |          |
| Same | AGA | AATGGGCT | ACATT | GTCT | GAACC----- | AGAT | CATTAC--GGAAA--   | GTT | GTCTGAAA |          |
| Chch | AGA | AATGGGCT | ACATT | TTCT | ACTCC----- | AGAA | TACT-AC--GAAAG--  | GCA | CCATGAAA |          |
| Grgr | AGA | GATGGGCT | ACATT | TTCT | ACCC-----  | AGAA | TAT--AC--AGAC--   | A   | GTC      | CCCTGAAA |
| Caau | AGA | AATGGGCT | ACATT | TTCT | AACAT----- | AGAA | TATC-AC--GAACAT-- | GCA | CCATGAAA |          |
| Cyca | AGA | AATGGGCT | ACATT | TTCT | AAT-A--T-  | AGAA | TATTA-C--GAAC-AT- | GCA | CCATGAAA |          |
| Dare | AGA | AATGGGCT | ACACT | TTCT | ACCC-----  | AGAA | TAT--AC--GAAA--   | AT  | GTA      | ACATGAAA |
| Cost | AGA | AATGGGCT | ACATT | TTCT | TTT---AC-  | AGAA | TATT-AC--GAACA--  | ACA | CTATGAAA |          |
| Leec | AGA | AATGGGCT | ACATT | TTCT | AATTT----- | AGAA | TATC-AC--GAACA--  | GTA | CCCTGAAA |          |
| CrIa | AGA | GATGGGCT | ACATT | TTCT | ATAAT----- | AGAA | TAAG-AC--GAATA--  | GCA | TCATGAAA |          |
| Clmc | AGA | AATGGGCT | ACATT | TTCT | AT--A--GC- | AGAA | -TATCAC--GAACG--  | GCA | CCGTGAAA |          |
| Phin | AGA | AATGGGCT | ACATT | TTCT | ACA---AC-  | AGAA | TAT-TAC--GAACT--  | GCA | CTATGAAA |          |
| Icpu | AGA | AATGGGCT | ACATT | TTCT | ATACC---T- | AGAA | TATTAC--GAATG--   | GCA | CCATGAAA |          |
| Psto | AGA | AATGGGCT | ACATT | TTCT | ATCCA--TAT | AGAA | TATTAC--GAATG--   | ACA | TACTGAAA |          |
| Cora | AGA | AATGGGCT | ACATT | TTCT | ATTGC----- | AGAA | AATC-AC--GAAT--   | G   | TTI      | TACTGAAA |
| Eisp | AGA | AATGGGCT | ACATT | TTCT | ACAAT----- | AGAA | TATTCTAC-AGAC--   | G   | CCG      | CCCTGAAA |
| Apal | AGA | AATGGGCT | ACATT | TTCT | ACAAT----- | AGAA | TATTTTAACGAACG--  | GTA | GCATGAAA |          |
| EsLu | AGA | AATGGGCT | ACATT | TTCT | AATTC----- | AGAA | TATAC---GAACT--   | ACA | CTGTGAAA |          |
| Dape | AGA | AATGGGCT | ACATT | TTCT | AAAC---T-  | AGAA | TAT--AC--GAACC--  | CTG | TTGTGAAA |          |
| Glse | AGA | AATGGGCT | ACATT | CTCT | AACC---TT- | AGAG | TATTAAC--GAATG--  | ACT | CTGTGAAA |          |
| Naar | AGA | AATGGGCT | ACATT | CTCT | AA-----TTT | AGAG | TA--CAC--GGACA--  | ACA | CTGTGAAA |          |
| Baoc | AGA | AATGGGCT | ACATT | CTCT | GACCC--TC- | AGAG | TAT--AC--GAACG--  | ATG | TTGTGAAA |          |
| Opso | AGA | AATGGGCT | ACATT | CTCT | AA-CC--T-  | AGAG | CAATAC--GAATA--   | GTA | CTGTGAAA |          |
| Alte | AGA | AATGGGCT | ACATT | TTCT | GACT-----C | AGAA | TACTAC--GAACG--   | GCA | CCATGAAA |          |
| Plap | AGA | AATGGGCT | ACATT | TTCT | GA--C--CC- | AGAA | TACT-AC--GAACG--  | GCA | CCCTGAAA |          |

Plal AGA AATGGGCT ACATT ACCT AA-CT---C-AGGT CATT-AC--GGAGG---GAC CTGTGAAA  
 Sami AGA AATGGGCT ACATT ACCT ACCAC-----AGGT TATT-AC--GGAG---G GGC CTGTGAAA  
 Rere AGA AATGGGCT ACATT CCCT AAT----TT-AGGC CACT-AC--GGAT-A--GTC CTGTGAAA  
 Gama AGA AATGGGCT ACATT CCCT GTTTT-----AGGC AAAA-AC--GGAC---G GGC GCGTGAAA  
 Onmy AGA AATGGGCT ACATT CTCT AAA-----TTAGAG C-ACTAC--GAACC---ACC CTGTGAAA  
 Sasa AGA AATGGGCT ACATT CTCT AA--A--TT-AGAG CA-CTAC--GAACC---ACC CTGTGAAA  
 Cola AGA AATGGGCT ACATT CTCT AAAT---T--AGAG CATT-AC--GAACC---ACC CTGTGAAA  
 Dita AGA AATGGGCT ACATT TCCT GGA---CC-AGGA TATC-AC--GGAAG---GTC TTATGAAA  
 Gogr AGA AATGGGCT ACATT TCCT ATA-A--T--AGGT ACCAC---GACAG---ATA CTATGAAA  
 Chsl AGA AATGGGCT ACATT CCCC AAC---CT-AGGC AACT-AC--GAATG---CTC CCATGAAA  
 Atja AGA AATGGGCT ACATT CTCT AGCA-----CAGAG TA--CAC--GAATG---ATA TGATGAAA  
 lido AGA AATGGGCT ACATT CTCT AAT---GC-AGAG TAC--AC--GAAT-G--ATC TGATGAAA  
 Auja AGA AATGGGCT ACATT CTCT AA-AT-----AGAG AAAC-AC--GAAAG---ATG TGATGAAA  
 Chag AGA AATGGGCT ACATT CTCT TCTTC--AC-AGAG AA-C-AC--GGAAG---GTC CAATGAAA  
 Hami AGA GATGGGCT ACATT CTCT AGA---CC-AGAG -AATTAC--GAAAG---AGG TTTTGAAA  
 Saun AGA GATGGGCT ACATT CTCT ACTAA--CC-AGAG AAC-AC--GAAA-G--AGA TTTTGAAA  
 Nema AGA AATGGGCT ACATT TTCT GAC-C--C--AGAA AACTTTA-CGGAAG---GAA AAATGAAA  
 Disp AGA GATGGGCT ACATT TTCT GACC---C-AGAA -AATTAC--GAAAG---GAA AAATGAAA  
 Myaf AGA GATGGGCT ACATT TTCT GAC---CC-AGAA A-ACTAC--GAAAGA--AGA ATATGAA-  
 Lagu AGA AATGGGCT ACATT CTCT ACCCC-----AGAA TAT--AC--GAAA---GGG TGTGAAA  
 Trtr AGT AATGGGCT ACATT CTCT AAT-T--A--AGAG TACT-AC--GGAAG---GGG GGTGAAA  
 Zucr AGA AATGGGCT ACATT CTCT GATTC-----AGGC TACC-AC--GGAAG---AGG GATTGAAA  
 Pxja AGA GATGGGCT ACATT CTCT ACTAT-----AGAG TAT--AC--GAACG---GTA TATTGAAA  
 Pxlo AGA GATGGGCT ACATT CTCT ACTAC-----AGAG TATT-AC--GAACG---GTA TATTGAAA  
 Pctr AGA AATGGGCT ACATT CTTT CAAAC--C--AGAG AAC--AC--GAACA---GTC GGCTGAAA  
 Apsa AGA AATGGGCT ACATT CTCT CAATG-----AGAT TATT-AC--TAAT---GTA AATTGAAA  
 Cabe AGA AATGGGCT ACATT TTCT CACG-----GAGAA AACT-AC--GGAA---ACC AACTGAAA  
 Bzze AGA AATGGGCT ACATT TTCT ACACA-----AGAA AATT-AC--GGAG---GTA AACTGAAA  
 Siim AGA AATGGGCT ACATT TTCT TATCA-----AGAA AAC--AC--GGACT---GAG GGATGAAA  
 Ctru AGA AATGGGCT ACATT TTCT TAGTC-----AGAA AAT--AC--GAAA---GTC TGCTGAAA  
 Dpbr AGA AATGGGCT ACATT TTCT TA-----CACAGAA AAT--AC--GAAA---GTC TACTGAAA  
 Caki AGA AATGGGCT ACATT CCCT AAT-----GAAGGC A--ACAC--GAATG---GTA GTTTGAAA  
 Phja TAA AATGGGCT ACATT CTCT ATTAT-----AGAG AAC--AC--GAAT---GTA ACTTGAAA  
 Brsp AGA GATGGGCT ACATT TTCT ATA---CT-AGAA AACAC---GAATG---ATT ATCTGAAA  
 Gamo AGA AATGGGCT ACATT CTCT GTT-----ACAGAG A-A-TAC--GAATT---GTA ATTTGAAA  
 Lolo AGA AATGGGCT ACATT CTCT ACTAC-----AGAG A-AT-AC--GAATG---GTA TTTTGAAA  
 Batr TGA AATGGGCT ACATT TTCT TA-----A-AGAA AA-A-AC--GAATT---GAA CATTGAAA  
 Prmy CAA AATGGGCT ACATT CCCT TAT-----AGGC AAC-AC--GAATC---AAC GGCTGAAA  
 Loli TGA AATGGGCT ACATT CCCT AA-----ATAAGAG AAA--AC--GAACGA--CTC TCCTGAAA  
 Loam AAA AATGGGCT ACATT CACT ATTTA-----AGAG AA-T-AC--TAAC---GATG TATTGAAA  
 Chab AGA AATGGGCT ACATT CCCT AA-----CAAAGCC AAT--AC--GAATA---GTC CATTGAAA  
 Chto AGA AATGGGCT ACATT CCCT AA-----CAAAGCC AAT--AC--GAATA---GTC CATTGAAA  
 Majo AGC AATGGGCT ACATT CACT GCATC-----AGTG A--ATAC--GAAGG---ATC CACTGAAA  
 Hlst TGA AATGGGCT ACATT CCCT AC-----TACAGGC CA--TAC--GAATT---ACA TGTTGAAA  
 Clpe AGA AATGGGCT ACATT CCCT GTATA-----AGCC CAT--AC--GGATA---ATA CACTGAAA  
 Mlmr AGA AATGGGCT ACATT CCCT AAC-A--A-AGTG CA-C-AC--GGATAG--GAC GGCTGAAA  
 Crcr AGA AATGGGCT ACATT TCCT AACAC-----AGGA -AAT-AC--GAAT---ATC CACTGAAA  
 Muce AGA AATGGGCT ACATT TCCT AACAC-----AGGA AA-T-AC--GAAT---ATC TACTGAAA  
 Bege AGA AATGGGCT ACATT TTCT GC-----CACAGAA AAC--AC--GGACA---ATC AAATGAAA  
 Mela AGA AATGGGCT ACATT TTCT GAAAC-----AGAA AAT--AC--GGAT---TATG TAATGAAA  
 Hats AGA AATGGGCT ACATT CTCT AC-----CTCAGAA CAT--AC--GGATA---ATC AAATGAAA  
 Orla AGA AATGGGCT ACATT CCTI GCT-T--CA-AGGA AAAC-----GGATA---GTA TAATGAAA

Cosa AGA AATGGGCT ACATT CCCT GAC --- TT - AGGC TAT - - AC - - GAAAA - - ATA CAATGAAA  
 Exsp AGA AATGGGCT ACATT CCCT AAATC - - - - - CGGC CAT - - AC - - GGATA - - GTA TAATGAAA  
 Depa AGA AATGGGCT ACATT CCCT AAAT - - - - - AGGC TAT - - AC - - GAAAA - - ATA TGATGAAA  
 Rima AGA GATGGGCT ACATT TCCT AC - - A - - C - A GGGG ACC - - AC - - GGAT - A - GTA CAATGAAA  
 Fuol AGA AATGGGCT ACATT TTCT GCTTA - - A - - GGAA A - T - - AC - - GGATT - - ACA CTATGAAA  
 Gmaf AGA AATGGGCT ACATT TCCT TCCCT - - C - - AGGA AACA - - C - - GAATT - - GTC CTATGAAA  
 Xeei AGA AATGGGCT ACATT TCCT CAATG - - - - - AGGA AACC - - AC - - GGAAT - - GTC TCATGAAA  
 Pros AGA GATGGGCT ACATT CTCT ACCCC - - C - - AGAG AAC - - AC - - GAATGAA TAG TACTGAAA  
 Scmi GGA GATGGGCT ACATT CTCT ACCCC - - - - - AGAG AAAT - - AC - - GAATGTAC TAG TATTGAAA  
 Rolo AGA AATGGGCT ACATT CCCT ACTAC - - - - - AGGC AA - - TAC - - GAACG - - GTC TATTGAAA  
 Cere AGA AATGGGCT ACATT CCCT ATCAC - - - - - AGGC AAT - - AC - - GAAA - - GATG TAATGAAA  
 Daga AGA AATGGGCT ACATT CCCT ACC - T - - TT - AGGC AATA - - C - - GGAAG - - GTA AAATGAAA  
 Anco AGA AATGGGCT ACATT CTCT ACCCC - - - - - AGAG AACA - - C - - GAAC - - GTC TAATGAAA  
 Dmve AGA AATGGGCT ACATT CTCT ATCA - - - - - C AGAG AAC - - AC - - GGACG - - GTA CAATGAAA  
 Dmar AGA AATGGGCT ACATT CTCT ACCCTCCCC AGAG - - AACAC - - GAATA - - GTA CAATGAAA  
 Anka AGA AATGGGCT ACATT TTCT CTGCC - - AT - AGAG AATT - - AC - - GGATG - - GTC TAATGAAA  
 Moja AGA AATGGGCT ACATT CTCT GCCA - - - - C - AGAG AAT - - AC - - GAACG - - GTC TAATGAAA  
 Hoja AGA AATGGGCT ACATT CTCT GCCCC - - - - - AGAG AACA - - C - - GAACG - - GTC TAATGAAA  
 Bede AGA GATGGGCT ACATT CTCT ACTAC - - - - - AGAG AAC - - AC - - GAATGTAT TAG TACTGAAA  
 Bsp AGA GATGGGCT ACATT CTCT ACTA - - - - - C AGAG AACTAC - - - GAATGTAT TAG TACTGAAA  
 Mysp AGA AATGGGCT ACATT CCCT GCT - C - - C - - AGGC AAC - - AC - - GAATA - - GTA CACTGAAA  
 Osja AGA AATGGGCT ACATT CCCT GCCA - - - - - C - AGGC AAT - - AC - - GAATA - - GTA CACTGAAA  
 Sgro AGA AATGGGCT ACATT CCCT AA - CT - - - - - C AGGC - - AATAC - - GAATA - - ATA CACTGAAA  
 Pzpa AGA AATGGGCT ACATT CTCT CTTG - - - - - - AGAG - CAT - AC - - GAATG - - ATA GATTGAAA  
 Zeja AGA AATGGGCT ACATT CTCT CCC - - - - - - G AGAG CA - - TAC - - GAATG - - ATG TTTTGAAA  
 Znne AGA AATGGGCT ACATT TTCT CTCG - - - - - - AGAA TAT - - AC - - GAATA - - GTC TGTTGAAA  
 Zefa AGA AATGGGCT ACATT TTCT CTTG - - - - - - AGAA AAA - - AC - - GAATG - - GTC TGTTGAAA  
 Acni AGA AATGGGCT ACATT CTCT CT - - - - - TG - AGAG TAT - - AC - - GAATG - - ATG TATTGAAA  
 Ncrh AGA AATGGGCT ACATT CTCT CTTG - - - - - - AGAG CAT - - AC - - GAA - - TGATG TATTGAAA  
 Agca AGA GATGGGCT ACATT CCCT TAATT - - A - - AGGC CAC - - AC - - GGAA - G - GTC CACTGAAA  
 Hydy AGA AATGGGCT ACATT CGCT GCAAC - - - - - AGCC AAC - - AC - - GAATG - - ATG AACTGAAA  
 Gsac AGA AATGGGCT ACATT CGCT ACAA - - - AT - AGCC AAC - - AC - - GAATG - - ATG TCCTGAAA  
 Pevo AGA AATGGGCT ACATT CGCT GAC - - - - AC - AGCC TATTA - - CGAATT - - A GCC CACTGAAA  
 Hiku AGA AATGGGCT ACATT CATI TA - - - - - TT - AATG A - A - TAC - - GGATG - - GTA TATTGAAA  
 Inpa AGA AATGGGCT ACATT CTCT AACAC - - - TA GCAG A - C - - AC - - GAATT - - ATG CGTTGAAA  
 Auch AAG AATGGGCT ACATT CGCT TACTT - - CA - AGCC CAT - - AC - - GGAACT - TAA CACTGAAA  
 Fico AGA AATGGGCT ACATT CGTT AGT - - - - CT - AACG AACTTAC - - GAAA - A - CCA TAATGAAA  
 Macs AGA AATGGGCT ACATT CATI AAT - T - - T - - AATG AAC - - AC - - GGAAG - - ACC TACTGAAA  
 Moal AGA AATGGGCT ACATT CTCT AACCC - - T - A GCAG AT - - - - AC - - GAAA - A - ATG AACTGAAA  
 Syma AGA GATGGGCT ACATT CTCT ACC - A - - CTAGTAG TTC - - - - - GAATA - - ACC CATTGAAA  
 Mafr AGA AATGGGCT ACATT CACT ACCTA - - - - - AGTG AAC - - AC - - GAATG - - ATA AATTGAAA  
 Dcpe AGA AATGGGCT ACATT TGCT TACTC - - A - - AGTG AGCAC - - - - CTAGA - C - CAT AACTGAAA  
 Dcti AGA AATGGGCT ACATT TGCT TA - - C - - TCA AGTG AGC - - AC - - CTAGAC - - CAT AACTGAAA  
 Hehi AGA AATGGGCT ACATT CCCT ACAAT - - - - - AGGC AAC - - AC - - GAATG - - GTC CACTGAAA  
 Stam AGA AATGGGCT ACATT CTCT ATAAT - - - - T AGTG AAT - - AC - - GGAT - - GATG TACTGAAA  
 Hogi AGA AATGGGCT ACATT CCCT GAA - G - - A - - AGGC TACA - - C - - GAACG - - ATG AACTGAAA  
 Erzo AGA AATGGGCT ACATT TGCT ATTAT - - - - - AGCA AAT - - AC - - GGATG - - GTC TTCTGAAA  
 Hxot AGA AATGGGCT ACATT CGCT ACTAC - - - - - AGCC AAC - - AC - - GGAAG - - GTC CACTGAAA  
 Core AGA AATGGGCT ACATT CGCT ACC - - - - AC - AGCC AAC - - AC - - GAATG - - ATG CGCTGAAA  
 Apve AGA AATGGGCT ACATT CGCT ACT - - - - GT - AGCC AAC - - AC - - GAAA - G - ACC GACTGAAA  
 Latj AGA AATGGGCT ACATT CATI ACCCT - CCCT AATG AA - - CAC - - GAATG - - ATG CACTGAAA  
 Laja AGA AATGGGCT ACATT CCCT GAC - - - - AC - AGGC AA - ACAC - - GGAT - G - ACA CACTGAAA



Syja AGA AATGGGCT ACATT CACT GA-----AAC AGTC AA--TAC--AGATG---GCA TGATGAAA  
 Epme AGA AATGGGCT ACATT CCCT GTTAC-----AGCG AATC-AC--GGATAA--TAA TACTGAAA  
 Grse AGA AATGGGCT ACATT CCCT CAATA--TC--AGGG AAC--AC--GAA---AA GTC CACTGAAA  
 Clja TGA GATGGGCT ACATT GTT TAATG--C--AAAC AAAT-AC--GAAAGA--TTA CTCTGAAA  
 Ogcy AGA AATGGGCT ACATT CCCT AAA-----TC AGGG A-A-CAC--GAACA---ATA TGATGAAA  
 Plna TAA GATGGGCT ACATT CCCT GAT-----TC--AGGG TAT--AC--GGATA---ATC CATTGAAA  
 Lema AGA AATGGGCT ACATT CTTT AAT-----AA AAAG --AATAC--GAATG---ACT GACTGAAA  
 Etzo AGA AATGGGCT ACATT TCCT GCTA--C--AGGA AATA--C--GGACG---ATC CACTGAAA  
 Apse AGA AATGGGCT ACAAT TGCT TA--A--AC--AGCT AAAAC---GAATG--TAA CGCTGAAA  
 Epde AGA AATGGGCT ACATT CCCT AAT---GC--AGAC AAT--AC--GAATG---ACA CATTGAAA  
 Slja AGA GATGGGCT ACATT CCCT GACTC-----AGGG AATT-AC--GAATGG--TCA TGCTGAAA  
 Bsja AGA AATGGGCT ACATT CTCT AATAC-----AGAC CATA-CG--GAAG---GTA CATTGAAA  
 Ecna AGA AATGGGCT ACATT CACT AATTA----T AGTC --AACAC--GAATA---AAG TATTGAAA  
 Cohi AGA GATGGGCT ACATT CACT AACAT-----AGTC AAT--AC--GAATA---GTA TATTGAAA  
 Caar AGA AATGGGCT ACATT CGCT GTCTG--C-C AGCG A-A-CAC--GAATG---ACC CATTGAAA  
 Came AGA AATGGGCT ACATT CGCT GCCCA--C--AGCG AAC--AC--GAATG---CTA CACTGAAA  
 Mema AGA AATGGGCT ACATT CACT AGCAG--T--AGTC AATTTAC--GAAAA---ATC CATTGAAA  
 Lenu AGA AATGGGCT ACATT CCCT GTAAC-----AGGG AACA-AC--GAA---AG TCT CTATGAAA  
 Plma AGA AATGGGCT ACATT CGCT AATAC-----AGCG AAT--AC--GAATG---ATC TACTGAAA  
 Emst AGA AATGGGCT ACATT CCCT AAT---AC--AGTC AAT--AC--GGACG---ATA TACTGAAA  
 Ptti AGA AATGGGCT ACATT CACT AA--C--AC--AGTC -AACTAC--GAACG---ATA CGCTGAAA  
 Losu GGA GATGGGCT ACATT CTCT ATTTT-----AGAC AAT--AC--GGATG---GTG TAATGAAA  
 Geoy AGA AATGGGCT ACATT TCCT CGCGA--C--AGGA AA-T-AC--GGATA---ACC TACTGAAA  
 Dipi AGA AATGGGCT ACATT CACT GCATC-----AGTC AA-T-AC--GGA---TAGTC CATTGAAA  
 Pama AGA AATGGGCT ACATT CCCT TTTTAAACAT AGGG T--ACTA-CGAAAG---ATC CACTGAAA  
 Leob AGA AATGGGCT ACATT CACC CTTTA--C--GGTG TACT-AC--GAAAGA--TGC AATTGAAA  
 Neba AGA AATGGGCT ACATT CTCT ATAGC--AG--AGAA TA--CA--GAGG--ATAG TCCTGAAA  
 Pdpi AGA AATGGGCT ACATT CGCT AACA--GTAG CCGA A-C--AC--GGATG---TTC CATTGAAA  
 Nimi AGA AATGGGCT ACATT CTCT AG--C--AT--AGAC AAC--AC--GGATG---ACC TGTTGAAA  
 Uptr AGT AATGGGCT ACATT CACT GCATC-----AGTC AAT--AC--GAAAG---GTG CGCTGAAA  
 Pesc AGC AATGGGCT ACATT CTCT CCCA---C--AGAC AAT--AC--GGATG---ATC AATTGAAA  
 Baar AGA GATGGGCT ACATT CTCT AATG-----C AGAC AA--TAC--GGACG--ATCC CACTGAAA  
 Moar AGA AATGGGCT ACATT CCCT AATAA---C--AGTC AA--TAC--GGACG---ATA CACTGAAA  
 Toja AGA GATGGGCT ACATT CGCT AACAA--C--AGCG AAC--AC--GAATA---ATC CACTGAAA  
 Chau AGA AATGGGCT ACATT TACT AA--C--AC--AGTA AAT--AC--GGATGA--TTA CCCTGCAA  
 Chse AGA AATGGGCT ACATT CCCT AATAC----T AGGG CA--TAC--GAATG---ATA TGCTGAAA  
 Enar AGA AATGGGCT ACATT CCCT AATTT-----AGTC AAT--AC--GGATA---ATA TGTTGAAA  
 Hpty AGA AATGGGCT ACATT CCCT AACA----C--AGCG AAT--AC--GAACG---ATC CACTGAAA  
 Nana AGA AATGGGCT ACATT CCCT AATAT-----AGGG AAT--AC--GAAAG---ACA AATTGAAA  
 Mcst AGA AATGGGCT ACATT CACT AGTAC-----AGTC AAT--AC--GAATGA--TGC TACTGAAA  
 Rhox AGA AATGGGCT ACATT CCCT AACA----C--AGTC AAT--AC--GAAAG---ATC CACTGAAA  
 Opfa AGA AATGGGCT ACATT CACT AAGAC-----AGTC AAC--AC--GAAC--GATG TACTGAAA  
 Paar AAA AATGGGCT ACATT CCCT GG----TTAC AGGG ---CATA--CAGAT--GACA GACTGAAA  
 Gozo AGA AATGGGCT ACATT CCCT ATTTT-----AGGG AAT--AC--GAAC--GATC CTTTAAAA  
 Ackr AGA GATGGGCT ACATT CCCT AGCAA--T--AGGG TAC--AC--GGATA---ATA CACTGAAA  
 Elev AGC AATGGGCT ACATT CGCT ACTC-----AGCG AAAA--C--GAAC---GACA AAAATGAAA  
 Trdu AGA AATGGGCT ACATT CCCT GCCGC-----AGGG AA-T-AC--GAAC---ATG TAATGAAA  
 Amoc AGA AATGGGCT ACATT TCCT AAATC-----AGGA AACA--C--GAACA---ATC AACTGAAA  
 Hame AGA AATGGGCT ACATT CAGT AAA-----TT AATG C-A-TAC--GGATG---ACA TCCTGAAA  
 Chso AGA GATGGGCT ACATT CAGT GAT-----AGCA CTGAATAC-GGAGA---GTI GATTGAAA  
 Lyto AGA AATGGGCT ACATT CGCT GCA-A--C--AGCG AAC-A-C--GGACG---ATC CACTGAAA  
 Encr AGA AATGGGCT ACATT CGCT AG-CA----T AGCG --AATAC--GGACG---ATC CACTGAAA

|      |                  |      |            |       |       |                 |      |      |          |
|------|------------------|------|------------|-------|-------|-----------------|------|------|----------|
| Bvar | AGAAACGGCTCCATT  | TTCT | ATTA       | ----- | AGAA  | CCC--CC--GATA   | ---- | ATG  | TGCTGAAA |
| Noco | AGAAATGGGCTACATT | CCCT | AATTT      | ----- | AGGG  | CAC--AC--GAATG  | ---  | ATA  | TGCTGAAA |
| Chsp | AGAGATGGGCTACATT | CTCT | GAA-C--C-- |       | AGAG  | AACTTAC--GAAAA  | ---  | GTC  | TAATGAAA |
| Arja | AGAAATGGGCTACATT | CGCT | ACTAC      | ----- | AGCC  | AAC--AC--GAATG  | ---  | GTC  | TAATGAAA |
| Pase | TGAGATGGGCTACATT | CGCT | AGCTA--T-- |       | AGCC  | CATA-AC--GGATGG | ---  | CAT  | TCCTGAAA |
| Trel | AGAGATGGGCTACATT | TGCT | AACAC      | ----- | AGCA  | CATTCAC--GCAGG  | ---  | ACC  | AATTGAAA |
| Lifa | AGAGATGGGCTACATT | TTCT | ATA-----   |       | CATAG | ATCAAAC--GAATT  | ---  | ATC  | CTCTGAAA |
| Acur | AGAGATGGGCTACATT | TTCT | ATTAT      | ----- | AGAA  | CAT--AC--GAAT   | ---  | ACT  | CATTGAAA |
| Ampe | AGAAATGGGCTACATT | CCCT | AA--T--GT  |       | AGTG  | AAT--AC--GAACG  | ---  | ATC  | CACTGAAA |
| Urja | TGAGATGGGCTACATT | CCCT | AAT-G--A-- |       | AGGG  | AA-T-AC--GAATG  | ---  | ATA  | GACTGAAA |
| Enet | AGAAATGGGCTACATT | CCTI | GTT----CCC |       | AAGG  | AAA--AC--GGAT-A |      | ATC  | ACATGAAA |
| Ptbr | AGAAATGGGCTACATT | TCCT | ATA---CT-  |       | AGGA  | CAT--AC--GGAAT  | ---  | GTC  | TGTTGAAA |
| Safa | AGAAATGGGCTACATT | TCCT | ACGCC--GC- |       | AGGA  | AAT--AC--GAAAA  | ---  | GTT  | TACTGAAA |
| Icae | AGAAATGGGCTACATT | CGCT | AGTA---C-  |       | AGCC  | AA-T-AC--GAACG  | ---  | ATC  | CACTGAAA |
| Asmi | TTAAATGGGCTACATT | CTCT | ACTAG--TT- |       | AGAG  | CAT--AC--GAAAG  | ---  | GTC  | TATTGAAA |
| Foal | AGTAGTGGGCTACATT | TACT | ATTTT----- |       | AGTA  | TAT-ACG--AACAA  | --A  | GTC  | --CTGAAA |
| Drze | TGAAATGGGCTACATT | CACT | AATA---CT  |       | AGTG  | AAA--AC--GAATG  | ---  | TTG  | TTCTGAAA |
| Rhas | AGAAATGGGCTACATT | CACT | GA--T--GC- |       | AGTG  | -AAC-AC--GAACG  | ---  | ATA  | GCCTGAAA |
| Elac | AGAAATGGGCTACATT | TACT | GAT---AC-  |       | AGTA  | TAC--AC--GAACG  | ---  | ATC  | CATTGAAA |
| Kugu | AGAAATGGGCTACATT | TACT | GAAAC----- |       | AGTA  | CAT--AC--GAAC   | ---  | GACC | AATTGAAA |
| Plor | AGAAATGGGCTACATT | CTCT | AATCT--C-- |       | AGAG  | AACAC---GCACG   | ---  | ACA  | TAATGAAA |
| Sgun | AGAAATGGGCTACATT | CCCT | GCCCC----- |       | AGGG  | AATC-AC--GAAC   | ---  | GATA | CTCTGAAA |
| Zaco | AGAAATGGGCTACATT | CCCT | CCCCT--C-- |       | AGGG  | AATT-AC--GGACG  | ---  | ATC  | TACTGAAA |
| Zbfl | AGAAATGGGCTACATT | CCCT | AATTC----- |       | AGCC  | CAT--AC--GGACG  | ---  | ACA  | CACTGAAA |
| Spba | AGAGATGGGCTACATT | CGCT | AACA----TT |       | AGCC  | AA--TAC--GAACG  | ---  | CTC  | CATTGAAA |
| Game | AGAAATGGGCTACATT | CGCT | AACG----T- |       | AGCC  | AA-T-AC--GAACG  | ---  | ATG  | TACTGAAA |
| Thth | AGAAATGGGCTACATT | CGCT | AGT---AT-  |       | AGCC  | AAT--AC--GAACG  | ---  | ATC  | CACTGAAA |
| Xigl | AGAAATGGGCTACATT | CGCT | AGTAG--T-- |       | AGCC  | AAT--AC--GAATG  | ---  | TTG  | CATTGAAA |
| Hyja | AGAAATGGGCTACATT | CCCT | AATAT--T-- |       | AGCC  | ATTACAC--GAATGA | ---  | TTG  | TAATGAAA |
| Psan | AGAAATGGGCTACATT | CTCT | AACAT--T-- |       | AGAG  | AAC--AC--GAATGA | ---  | TTG  | TAATGAAA |
| Cupa | AGAAATGGGCTACATT | CGCT | AAC---AC-  |       | AGCC  | -AAT-AC--GAACG  | ---  | ATG  | TACTGAAA |
| Mpch | AGAAATGGGCTACATT | TTCT | AAATT----- |       | AGAA  | AACT-AC--GAATA  | ---  | ATA  | CATTGAAA |
| Char | AGAAATGGGCTACATT | CACT | ACC-A--T-- |       | AGTG  | AATA--C--GAATG  | ---  | ATC  | AACTGAAA |
| Pser | AGAAATGGGCTACATT | CTCT | AAA-----TT |       | AGAG  | A-A-CAC--GAATG  | ---  | ATC  | CATTGAAA |
| Prol | AGAAATGGGCTACATT | TGCT | AAAGC--T-- |       | AGCA  | AAT--AC--GAATA  | ---  | ATC  | CATTGAAA |
| Plbi | AGAAATGGGCTACATT | TGCT | AAATA--T-- |       | AGCA  | AACAC---GAATG   | ---  | TTG  | CATTGAAA |
| Calu | AGAGATGGGCTACATT | TGCT | CG--C-TTAG |       | AGCA  | AAT-AC--AGATA   | ---  | CCT  | CGTTGAAA |
| Papa | AGAAATGGGCTACATT | CTCT | GACAC--TC- |       | AGAG  | AACTTAC--GAATG  | ---  | GCA  | TGTTGAAA |
| Sufr | AGCAATGGGCTACATT | ACCT | GCC---CC-  |       | AGGT  | AATC-AC--GAACG  | ---  | ATA  | TATTGAAA |
| Stci | AGAAATGGGCTACATT | TTCT | AGCAT----- |       | AGAA  | AAT--AC--GGATG  | ---  | ATA  | TACTGAAA |
| Taru | CAAAATGGGCTACATT | CTCT | GCCTA--G-- |       | AGAA  | -C---AC--GAAAG  | ---  | ATC  | TGCTGAAA |
| Rala | AGAAATGGGCTACATT | CCCT | ACCCC----- |       | AGGG  | AACT-AC--GGACG  | ---  | ATG  | TATTGAAA |

\* \*

\*\* \*

\*

|      | 39'         |          | 31'              |       | 40    |         | 40'        |         |
|------|-------------|----------|------------------|-------|-------|---------|------------|---------|
| Scca | -----AAT    | TACCC    | -----AAAGGTGGA   | TTTAC | CAGTA | AGAGAAG | GTCA-GAGTA | CTTCTCT |
| Muma | -----ATA    | TACC-T   | -----AAAGGTGGA   | TTTAC | CAGTA | AGAGAAG | ATCAGA-GTA | CTTCCCT |
| Erca | -----CCTG   | TGTTT    | -----GAAGGAGGA   | TTTAC | CAGTA | AAGGGAG | AATAGA-GCC | CTCCTAT |
| Pose | -----CCTG   | TGCT     | -----AAAGGAGGA   | TTTAC | CAGTA | AGCGGGG | AGTAGA-GTG | CCCCACT |
| Actr | -----CCAG   | TGATT    | -----GAAGGTGGA   | TTTAC | CAGTA | AAAAGAA | AA-TAGAAAA | TTCTTTT |
| Scal | -----CCAG   | TGATT    | -----GAAGGTGGA   | TTTAC | CAGTA | AAAAGAA | AATAGAAAA  | TTCTTTT |
| Posp | CC-----AG   | TGATT    | -----GAAGGTGGA   | TTTAC | CAGTA | AAAAGAA | AATAG-AGAA | TTCTTTT |
| Atsp | -----CTGG   | TATTT    | -----TAAGGTGGA   | TTTAC | CAGTA | AAAAGAA | AATAGA-GAG | TTCTTTT |
| Leoc | T-----TG-G  | TATTT    | -----TAAGGTGGA   | TTTAC | CAGTA | AAAAGAA | AA-TAGAGAG | TTCTTTT |
| Amca | CA----TAG-  | AATCTTT  | -----GAAGGTGGA   | TTTAC | CAGTA | AAAAGAA | AGCAG-AGAG | TTCTTTT |
| Osbi | -----CACG   | TACTT    | -----GAAGGAGGA   | TTTAC | TAGTA | AAAAGAA | AATAG-AGTG | TTCTTTT |
| Pabu | CT-----AG   | AATTT    | -----CAAGCGGA    | TTTAC | CAGTA | AAAAGAA | AA-TAGAGTG | TTCTATT |
| Hial | -T-----TGG  | TGCT     | -----GAAGGTGGA   | TTTAC | CAGTA | AAAAGAA | AGCA-GAGTG | TTCTTTT |
| Elha | -C-----CAA  | TGCT     | -----GAAGGTGGA   | TTTAC | CAGTA | AAAAGGC | AAC-AGAGAG | CCCCTTT |
| Mlcy | CC-----TG   | AGTCC    | -----AAAGACGGA   | TTTAC | CAGTA | AAAAAGA | AA-TAGAGAG | TTCTTTT |
| Algl | -----CAGG   | CATTTG   | -----GAAGGTGGA   | TTTAC | CAGTA | AAGAGTC | AAGTAGAGTG | TTCTCTT |
| Ptgi | TA-----AAG  | CACCT    | -----GAAGGTGGA   | TTTAC | CAGTA | AAAAGAA | A-ACAGAGTG | TTCTTTT |
| Alaf | CA-----TGG  | CGTACA   | -----GAAGGTGGA   | TTTAC | CAGTA | AAGAGAA | AACAGAGT-G | TTCTCTT |
| Nock | TA-----TGA  | CATA-AA  | -----GAAGGTGGA   | TTTAC | CAGTA | AAGAGAA | AGCAGAGT-G | TTCTCTT |
| Anja | TA-----AG-  | CACGACT  | -----GAAGGTGGA   | TTTAC | CAGTA | AAAAGAA | AATAGAGA-G | TTCTTTT |
| Gyki | -----TGTG   | TGGGCC   | -----GAAGGTGGA   | TTTAC | CAGTA | AAAAGAA | AG-AAGAGAG | TTCTTTT |
| Syka | AC-----AA   | CAC TAAT | -----GAAGGTGGA   | TTTAC | CAGTA | AAAAGAA | AA-TAGAGTG | TTCTTTT |
| Opma | CA-----GAA  | CACAATT  | -----GAAGGTGGA   | TTTAC | CAGTA | AAAAGAA | AATA-GAGAA | TTCTTTT |
| Comy | GA-----AAA  | CACAA    | -----CTGAAGGTGGA | TTTAC | CAGTA | AAAAGAT | AA-TAGAGAG | TTCTTTT |
| Sasp | T-----GT    | TATAT-T  | -----GAAGGTGGA   | TTTAC | TAGTA | AAATGAA | AATAGAG-TG | TTCTTTT |
| Eupe | -T----AAATA | CATACA   | -----GAAGGTGGA   | TTTTA | CAGTA | AAAGAGG | AACAGTAGAG | CCCCTTT |
| Enja | A-----GAC   | TATTT    | -----GAAGGTGGA   | TTTAC | CAGTA | AGAGGGG | AATA-GAGTG | CCCCTTT |
| Same | C-----GAC   | CAC TC   | -----GAAGGTGGA   | TTTAC | CAGTA | AAGGGGG | AA-TAGAGCC | CCCCCTT |
| Chch | T-----AGT   | AC-CC    | -----GAAGGTGGA   | TTTAC | CAGTA | AAAAGAA | AATAGA-GAG | TTCTTTT |
| Grgr | TC-----GGA  | CAC-TC   | -----GAAGGTGGA   | TTTAC | CAGTA | AAAAGAA | AATAG-AGTG | TTCTTTT |
| Caau | -C-----A-G  | TGCTT    | -----GAAGGAGGA   | TTTAC | TAGTA | AAAGGGA | AATAGA-GTG | TCCGTTT |
| Cyca | C----AA--   | TGCT-T   | -----GAAGGAGGA   | TTTAC | TAGTA | AAAGGGA | AATAGA-GTG | TCCCTTT |
| Dare | -C----AA--  | TACTT    | -----GAAGGAGGA   | TTTAC | CAGTA | AAAGAGA | AGCAG-AGTG | TTCTCTT |
| Cost | -----CT     | AGTACTT  | -----AAAGGAGGA   | TTTAC | TAGTA | AAAAGGA | AA-TAGAGTG | TCCCTTT |
| Leec | -A----A--T  | TACTC    | -----GAAGGAGGA   | TTTAC | TAGTA | AAAAGGA | AAT-AGAGTG | TCCCTTT |
| CrIa | AC----T-TAA | TGCTT    | -----GAAGGAGGA   | TTTAC | TAGTA | AAAAGGA | AAT-AGAGTG | TCCCTTT |
| Clmc | CT-----AG   | TGCC     | -----GAAGGTGGA   | TTTAC | TAGTA | AAAAACA | AA-TAGAGAG | TTCTTTT |
| Phin | CA----A--AG | TGCC     | -----GAAGGTGGA   | TTTAC | CAGTA | AAAATAA | AC-TAGAGTG | TTTTTTT |
| Icpu | -----AT-AA  | TGCT     | -----GAAGGTGGA   | TTTAC | TAGTA | AAAAGCA | AAT-AGAGTG | TCCCTTT |
| Psto | -----TA-AA  | TGCT     | -----GAAGGTGGA   | TTTAC | CAGTA | AAAAACA | AAC-AGAGTG | TCCCTTT |
| Cora | -C----A--CA | TACT     | -----GAAGGAGGA   | TTTAC | TAGTA | AAAAGCA | AA-TAGAGAG | TCCCTTT |
| Eisp | TC-----ATG  | CGCC     | -----GAAGGTGGA   | TTTAC | CAGTA | AAAAGCA | AAT-AGAGAG | TCCCTTT |
| Apal | -T-----ATG  | CGCC     | ---C---GAAGGTGGA | TTTAC | TAGTA | AAAAGCA | AACAG-AGTA | TCCCTTT |
| EsLu | -C----C--AG | TGCC     | ---C---AAAGGTGGA | TTTAC | CAGTA | AACAGAA | AATAG-AGTG | TTCTCTT |
| Dape | CC----A--A  | CAGCC    | -----AAAGGTGGA   | TTTAC | CAGTA | AACAGAA | AATAG-AGTG | TTCTATT |
| Glse | -C----C--AG | ATTCT    | -----GAAGCGGA    | TTTAC | CAGTA | AACAGAA | AATAG-AGTG | TTCTATT |
| Naar | -C-----CAG  | TGCT     | -----TAAGGTGGA   | TTTAC | CAGTA | AACAGAA | AA-CAGAGAG | TTCTCTT |
| Baoc | -C----C--AA | CATTT    | -----TAAGGTGGA   | TTTAC | CAGTA | AACAGAA | AATAGA-GAG | TTCTCTT |
| Opso | CC----A--G  | TAGTT    | -----AAAGGTGGA   | TTTAC | CAGTA | AATAGAA | AATAG-AGAA | TTCTTTT |
| Alte | -----CG-GG  | TGCC     | -----GAAGGTGGA   | TTTAC | CAGTA | AAAAGAA | AATAGA-GAG | TTCTTTT |
| Plap | -C----G--GG | TGCC     | -----GAAGGTGGA   | TTTAC | CAGTA | AAAAGAA | AATAGA-GAG | TTCTTTT |

|      |             |               |         |             |              |       |                |             |                |
|------|-------------|---------------|---------|-------------|--------------|-------|----------------|-------------|----------------|
| Plal | CC-----AG   | <b>TTCTT</b>  | -----   | GAAGGTGGA   | <b>TTTAC</b> | CAGTA | <b>AGGGGAA</b> | AATAG-AGAG  | <b>TTCTCT</b>  |
| Sami | C-----CGG   | <b>CCCCT</b>  | -----   | AAAGGTGGA   | <b>TTTAC</b> | CAGTA | <b>AGGGGTA</b> | AATAG-AGAG  | <b>TTCTCT</b>  |
| Rere | -C----CA--G | <b>CCCC</b>   | -T----- | GAAGGTGGA   | <b>TTTAC</b> | CAGTA | <b>AGAGGGA</b> | AATA-GAGTG  | <b>TTCTCT</b>  |
| Gama | -C----G--GC | <b>CCCCT</b>  | -----   | GAAGGTGGA   | <b>TTTAC</b> | CAGTA | <b>GACTGGA</b> | AGCA-GAGAG  | <b>TCCCGTC</b> |
| Onmy | -T-----CAG  | <b>CGTCCG</b> | -----   | AAGGTGAAA   | <b>TTTAC</b> | CAGTA | <b>AACAGAA</b> | AA-CAGAGAG  | <b>TTCTCT</b>  |
| Sasa | C-----CAG   | <b>CGTC</b>   | -----   | C-AAAGGTGGA | <b>TTTAC</b> | CAGTA | <b>AATAGAA</b> | AATAGA-GAG  | <b>TTCTCT</b>  |
| Cola | CC-----AG   | <b>CGTCC</b>  | -----   | GAAGGTGGA   | <b>TTTAC</b> | CAGTA | <b>AACAGAA</b> | AGCAGA-GAG  | <b>TTCTCT</b>  |
| Dita | -C-----CCA  | <b>CACC</b>   | -C----- | TAAGGTGGA   | <b>TTTAC</b> | CAGTA | <b>AGAGGGC</b> | AGCAGA-GCG  | <b>CCCCCT</b>  |
| Gogr | -C-----AAG  | <b>TATCC</b>  | -----   | AAAGCCGGA   | <b>TTTAC</b> | CAGTA | <b>AGGTAGA</b> | AAACAGCGTG  | <b>TTCTCT</b>  |
| Chsl | -----TTGG   | <b>TGTT</b>   | -CT---- | GAAGGAGGA   | <b>TTTAC</b> | CAGTA | <b>AGAAAA</b>  | ACCAGG-ACA  | <b>CTCTCT</b>  |
| Atja | -----A-CCA  | <b>CATCT</b>  | -----   | AAAGGAGGA   | <b>TTTAC</b> | CAGTA | <b>AGCAGGC</b> | AATAG-AAAG  | <b>CCCTACT</b> |
| Iido | -G----AT--A | <b>CATC</b>   | -T----- | AAAGGAGGA   | <b>TTTAC</b> | CAGTA | <b>AGCAGGC</b> | AATAG-AGAG  | <b>CCCTACT</b> |
| Auja | CA-----CA   | <b>CATCC</b>  | -----   | GAAGGTGGA   | <b>TTTAC</b> | CAGTA | <b>AGCAGAA</b> | AAAAG-TGTG  | <b>TTCTGCT</b> |
| Chag | CT-----CA   | <b>CACC</b>   | -C----- | TAAGGAGGA   | <b>TTTAC</b> | CAGTA | <b>AGAAGAA</b> | AGAAAAGAAAG | <b>TTCTCT</b>  |
| Hami | TA-----A-A  | <b>CCCCA</b>  | -----   | GAAGGAGGA   | <b>TTTAC</b> | CAGTA | <b>AGCACAA</b> | AAATAGAGAG  | <b>CTTGCT</b>  |
| Saun | -C----AA--A | <b>CCCCT</b>  | -----   | GAAGGCGGA   | <b>TTTAC</b> | CAGTA | <b>AGCACGA</b> | AAACAGCGAG  | <b>TTGGCT</b>  |
| Nema | A-----ACA   | <b>AACC</b>   | -----   | C-GAAGGAGGA | <b>TTTAC</b> | CAGTA | <b>AGCAGAA</b> | AGTAGA-GCG  | <b>TTCTGCT</b> |
| Disp | -----AAC-   | <b>CCCCT</b>  | -----   | GAAGGAGGA   | <b>TTTAC</b> | CAGTA | <b>AGCAAGC</b> | AGCAG-AGTG  | <b>CCCTGCT</b> |
| Myaf | -A----AA--A | <b>CTT</b>    | -----   | CCGAAGGAGGA | <b>TTTAC</b> | CAGTA | <b>ATCAGGC</b> | AGCAG-AGCG  | <b>CCCTAAT</b> |
| Lagu | AC----A--CA | <b>CCCCT</b>  | -----   | AAAGGAGGA   | <b>TTTAC</b> | CAGTA | <b>AGAGGAA</b> | AACAGA-GTG  | <b>TTCCCT</b>  |
| Trtr | TA----C---C | <b>CCCCT</b>  | -----   | C-AAAGGAGGA | <b>TTTAC</b> | CAGTA | <b>AGCGAGC</b> | AACTAGAGCG  | <b>TCCGCT</b>  |
| Zucr | -T----AT--C | <b>CCTT</b>   | -T----- | GAAGGAGGA   | <b>TTTAC</b> | CAGTA | <b>AGTGGAG</b> | AAATAGAGTG  | <b>TCCGCT</b>  |
| Pxja | CA----T---A | <b>TACCC</b>  | -----   | AAAGGAGGA   | <b>TTTAC</b> | CAGTA | <b>AGTAAAA</b> | AA-TAGAGCG  | <b>TTTTACT</b> |
| Pxlo | -T----AT--A | <b>CACCT</b>  | -----   | AAAGGAGGA   | <b>TTTAC</b> | CAGTA | <b>AGTAAAA</b> | AA-TAGAGCG  | <b>TTTTACT</b> |
| Pctr | TC----GC--C | <b>CGCTT</b>  | -----   | AAAGGAGGA   | <b>TTTAC</b> | CAGTA | <b>AGTAAAA</b> | ACAG--AGTG  | <b>TTTTACT</b> |
| Apsa | -T----AT--T | <b>AACCT</b>  | -----   | GAAGGAGGA   | <b>TTTAC</b> | CAGTA | <b>AGTAGAA</b> | AA--AGAGTT  | <b>TTCCACT</b> |
| Cabe | AC----C---G | <b>CATAC</b>  | -----   | GAAGGAGGA   | <b>TTTAC</b> | CAGTA | <b>AGCGGGC</b> | AACAT-AGTG  | <b>CCCCTCT</b> |
| Bzze | -T----AC--T | <b>TACCC</b>  | -----   | GAAGGAGGA   | <b>TTTAC</b> | CAGTA | <b>AGCAGAA</b> | AATAG-AGCG  | <b>TTCTGCT</b> |
| Siim | -----TGCC   | <b>CTCTC</b>  | -----   | CAAGGCGGA   | <b>TTTAC</b> | CAGTA | <b>AGAAGGA</b> | AATAG-AGTG  | <b>TCCGCT</b>  |
| Ctru | CA-----CA   | <b>CACCT</b>  | -----   | AAAGGAGGA   | <b>TTTAC</b> | CAGTA | <b>AGCAGTA</b> | AATAG-AGTG  | <b>TTCTGCT</b> |
| Dpbr | CG----T---A | <b>CACCT</b>  | -----   | AAAGGAGGA   | <b>TTTAC</b> | CAGTA | <b>AGCAGAA</b> | AATAG-AGTG  | <b>TTCTGCT</b> |
| Caki | -A----A--AC | <b>TACACT</b> | -----   | GAAGGAGGA   | <b>TTTAC</b> | TAGTA | <b>AGAAAGC</b> | AG-TAGAGTG  | <b>CCTTACT</b> |
| Phja | -A----A--GT | <b>TTTCT</b>  | -----   | GAAGGAGGA   | <b>TTTAC</b> | TAGTA | <b>AGTGAAC</b> | AGTAG-AGTG  | <b>CCTCACT</b> |
| Brsp | AGAAT-T-CTT | <b>AATACT</b> | -----   | GAAGGTGGA   | <b>TTTAC</b> | TAGTA | <b>GGAGGGA</b> | AT-AAGAGAG  | <b>TCCCCCT</b> |
| Gamo | -----AAAAT  | <b>TACCT</b>  | -----   | GAAGGAGGA   | <b>TTTAC</b> | CAGTA | <b>AGTAGGC</b> | AC-TAGAGTG  | <b>CCCTGCT</b> |
| Lolo | AG----AA--A | <b>CACCT</b>  | -----   | GAAGGAGGA   | <b>TTTAC</b> | CAGTA | <b>AGTAAGC</b> | AATA-GAGCG  | <b>CCCTACT</b> |
| Batr | CA-----CG   | <b>TTCAT</b>  | -----   | GAAGGCGGA   | <b>TTTAC</b> | TAGTA | <b>AACAGAC</b> | AACA-GAGTG  | <b>CTCTATT</b> |
| Prmy | CG----C---C | <b>CTTAA</b>  | -----   | GAAGGAGGA   | <b>TTTAC</b> | AAGTA | <b>AGTGAAT</b> | TTA--GAGCG  | <b>GTCCACT</b> |
| Loli | CC----G--CA | <b>CGTCT</b>  | -----   | GAAGGAGGA   | <b>TTTAC</b> | CAGTA | <b>AGCAGAA</b> | AATA-GAGTG  | <b>TTCTGCT</b> |
| Loam | -C----A--CA | <b>CGTCC</b>  | -----   | AAAGGAGGA   | <b>TTTAC</b> | CAGTA | <b>AGCAAAA</b> | AATAG-AGCG  | <b>TTTTGCT</b> |
| Chab | AC----T---G | <b>TACTT</b>  | -----   | GAAGGAGGA   | <b>TTTAC</b> | TAGTA | <b>AGCAAAA</b> | AATAGA-GCG  | <b>TATGCT</b>  |
| Chto | AC----T---G | <b>TACTT</b>  | -----   | GAAGGAGGA   | <b>TTTAC</b> | TAGTA | <b>AGCAAAA</b> | AATAGA-GCG  | <b>TATGCT</b>  |
| Majo | -----AA-AG  | <b>CATCT</b>  | -----   | GAAGGTGGA   | <b>TTTAC</b> | CAGTA | <b>AGAAGGC</b> | AGCA-GAGTG  | <b>CCCCTCT</b> |
| Hlst | -T----A--CA | <b>TATCT</b>  | -----   | GAAGGAGGA   | <b>TTTAC</b> | CAGTA | <b>AGCAAAA</b> | AATAG-AGAG  | <b>TTAAGCT</b> |
| Clpe | -----CGCG   | <b>TATTT</b>  | -----   | GAAGGAGGA   | <b>TTTAC</b> | CAGTA | <b>AGCACAA</b> | AGTAG-AGCG  | <b>TTGTGCT</b> |
| Mlmr | -----CGTG   | <b>TTCTT</b>  | -----   | GAAGAAGGA   | <b>TTTAC</b> | CAGTA | <b>AGCACAA</b> | AATAG-AGCG  | <b>TTGTACT</b> |
| Crcr | T-----AAG   | <b>CATATT</b> | -----   | GAAGGAGGA   | <b>TTTAC</b> | CAGTA | <b>AATGAAA</b> | AGCA-GAGCG  | <b>TTTCATT</b> |
| Muce | -----TAAG   | <b>CATATT</b> | -----   | GAAGGAGGA   | <b>TTTAC</b> | CAGTA | <b>AATGAAA</b> | AACAG-AGCG  | <b>TTTCATT</b> |
| Bege | CA-----AA   | <b>CATTT</b>  | -----   | GAAGGAGGA   | <b>TTTAC</b> | CAGTA | <b>AGCAAGA</b> | AATAG-AGTG  | <b>TCTTGCT</b> |
| Mela | AC----A---C | <b>ATTAT</b>  | -----   | GAAGGAGGA   | <b>TTTAC</b> | TAGTA | <b>AGCAAAA</b> | AATAG-AGTG  | <b>TTTTGCT</b> |
| Hats | A-----AA    | <b>CATTA</b>  | -----   | GAAGGAGGA   | <b>TTTAC</b> | AAGTA | <b>AGCAAAA</b> | AATA-GAGTG  | <b>TTTTGCT</b> |
| Orla | CG-----TG   | <b>TATTA</b>  | -----   | GAAGGAGGA   | <b>TTTAC</b> | CAGTA | <b>AGCAGTA</b> | AATA-GAGAG  | <b>TTCTGCT</b> |

Cosa -A----A--TG**TGTTA**-----GAAGGAGGA**TTTAC**CAGTA**AGAAGAA**AACA-GAGTG**TTCTACT**  
Exsp A-----GTA**TATTA**-----GAAGGAGGA**TTTAC**CAGTA**AGCAGTA**AATA-GAGTG**TCCTGCT**  
Depa -A-----GCA**CATTA**-----GAAGGAGGA**TTTAC**CAGTA**AGTAGAA**AATA-GAGTG**TTCTACT**  
Rima -T-----GTG**TACATT**-----GAAGAAGGA**TTTAC**CAGTA**AGTAAAA**AAT-AGAGTG**TTTTACT**  
Fuol -----CAG**TGTAT**-----GAAGGAGGA**TTTAC**TAGTA**AGTGAAA**AATAGA-GTG**TTTCACT**  
Gmaf -----TAA**CACAT**-----GAAGGTGGA**TTTAC**CAGTA**AGCAGAA**AACAGA-GAG**TTCCGCT**  
Xeei T-----TACT**CACAT**-----GAAGGAGGA**TTTAC**TAGTA**AGCAGAA**AACAGA-GTG**TTCTGCT**  
Pros -----CGTA**CAACT**-----GAAGGAGGA**TTTAC**AAGTA**AGTGGAA**AACAGA-GCG**TCCCCT**  
Scmi -----TATA**CAACT**-----GAAGGAGGA**TTTAC**AAGTA**AGTGAGA**AACAGA-GCG**TCCCCT**  
Rolo -----TATA**TACCC**-----GAAGGAGGA**TTTAC**CAGTA**AGTGGAA**AATAGA-GCG**TTCCACT**  
Cere -C-----TTA**CACCT**-----AAAGGAGGA**TTTAC**CAGTA**AGTAGGA**AGTAGAG-AG**TCCA**ACT  
Daga T-----TTT**TATCC**-----GAAGGAGGA**TTTAC**CAGTA**AGTAGGA**AAGCAGAGAG**TTCCACT**  
Anco -----CATA**CACCT**-----GAAGGAGGA**TTTAC**CAGTA**AGCAGAA**AATAGAG-CG**TTCTACT**  
Dmve -----TAAA**TACCTT**-----GAAGGAGGA**TTTAC**CAGTA**AGTATAA**AG-TAGAACA**TTTTACT**  
Dmar -----CAA**TACCTT**-----GAAGGAGGA**TTTAC**CAGTA**AGTGAAA**AGTAG-AACA**TTTTACT**  
Anka -----TACA**CACCT**-----GAAGGAGGA**TTTAC**CAGTA**AGCAGAA**AACAG-AGCG**TTCTACT**  
Moja C-----ATA**CACCT**-----GAAGGAGGA**TTTAC**CAGTA**AGTAAAA**AATAG-AGCG**TTCTACT**  
Hoja -----CACA**CACCT**-----GAAGGAGGA**TTTAC**CAGTA**AGTAGAA**AATAG-AGCG**TCCTACT**  
Bede C-----ATA**CAACT**-----GAAGGAGGA**TTTAC**CAGTA**AGTGGAA**AA-TAGAGCG**TTCCACT**  
Besp -----TATA**CAACT**-----GAAGGAGGA**TTTAC**CAGTA**AGTGGAA**AAT-AGAGCG**TTCCACT**  
Mysp -----CACG**TACTT**-----GAAGGAGGA**TTTAA**CAGTA**AGCAGGA**AACA-GAGCG**TTCTGCT**  
Osja -----CACG**TACTT**-----GAAGGAGGA**TTTAA**CAGTA**AGTAGAA**AATA-GAGTG**TCCTACT**  
Sgro -----CGCG**TATTT**-----GAAGGAGGA**TTTAA**TAGTA**AGTAGAA**AATA-GAGTG**TCCTACT**  
Pzpa -----TATC**TACCT**-----GAAGGAGGA**TTTAC**CAGTA**AGTGGTA**AATA-GAGAG**TTCCACT**  
Zeja -----CATA**CACCT**-----GAAGGAGGA**TTTAC**CAGTA**AGTGGCA**AGCA-GAGAG**CCCCACT**  
Zzne C-----ACA**CACCT**-----GAAGGAGGA**TTTAC**CAGTA**AGTGGAA**AATA-GAGCA**TCCCCT**  
Zefa -----CACC**CACCT**-----AAAGGAGGA**TTTAC**CAGTA**AGTGGTA**AATA-GAGTG**TCCCCT**  
Acni C-----ATA**CACCT**-----AAAGGAGGA**TTTAC**CAGTA**AGTGGCA**AATA-GAGCG**TCCCCT**  
Ncrh CA-----TA**CACCT**-----AAAGGAGGA**TTTAC**CAGTA**AGTGGCA**AA-TAGAGCG**TCCCCT**  
Agca -----TATA**CACCT**-----GAAGGAGGA**TTTAC**CAGTA**AGCAGAA**AATAG-CGTG**TTCTACT**  
Hydy -----CATT**CATCT**-----GAAGGAGGA**TTTAC**CAGTA**AGTAGAA**AAT-AGAGTG**TTCCACT**  
Gzac T-----GTA**CATCT**-----GAAGGAGGA**TTTAC**CAGTA**AGTAGAA**AA-TAGAGTG**TTCTACT**  
Pevo -----CGTG**GGTAT**-----GAAGGAGGA**TTTAC**AAGTA**AGAGGGA**AA-TAGAGCG**TCCCCT**  
Hiku -----CATA**AACCT**-----AAAGGAGGA**TTTAC**CAGTA**AGAAGAA**AA-TAGAGTG**TTCATCT**  
Inpa -----CCCG**CACAT**-----GAAGCAGGA**TTTAC**AAGTA**AGCAGAA**AAT-AGAGCG**TTCTACT**  
Auch -----TACA**TAGGTT**-----GAAGGTGGA**TCTAC**CAGTA**AGAGGGC**AAT-AGCGTG**CCCCTCT**  
Fico -----CCGTA**TGGTC**-----AAAGGAGGA**TTTAC**CAGTA**AGCGGAC**AGT-AGAGCG**CTCCACT**  
Mac3 AC-----GTA**TGTTCT**-----GAAGGAGGA**TTTAC**CAGTA**AGTGGAC**AAT-AGAGTG**CCCCACT**  
Moal -----ACA**CATTT**-----GAAGACGGA**TTTAC**AAGTA**AATAGAA**AAT-AGAGTG**TTCTATT**  
Syma TA-----TG**CGTCTT**-----GAAGATGGA**TTTAC**AAGTA**AATAGAA**AAC-AGAGAG**TTCCACT**  
Maf r -C-----ATT**TATCT**-----GAAGGAGGA**TTTAC**CAGTA**AGCAGGA**AAT-AGAGCG**TTCTGCT**  
Dcpe TA----G---T**TTGGTA**-----GAGCAAGGA**TTTAC**CAGTA**AGCGTAA**GAGTAGAGCG**CTACGCT**  
Dct i A-----TGT**TTGGTA**-----GAGCAAGGA**TTTAC**CAGTA**AGCGTAA**GAGTAGAGCG**CTACGCT**  
Hehi TA---C---G**CACCT**-----GAAGGAGGA**TTTAC**TAGTA**AGCGGGA**AATAG-CGTG**TTCCGCT**  
Stam -----GAGA**CATCT**-----GAAGGAGGA**TTTAC**TAGTA**AGCAGGA**AATAG-AGTG**TTCCGCT**  
Hogi CA-----AT**CATCT**-----AAAGGAGGA**TTTAC**CAGTA**AGTAGGA**AGTA-GAGTG**TCCTACT**  
Erzo -----TAT-A**CACCT**-----GAAGGAGGA**TTTAC**CAGTA**AGCGGAA**AATAGA-GTG**TTCCGCT**  
Hxot CG----T---A**CACCT**-----GAAGGAGGA**TTTAC**CAGTA**AGCGGGA**AATAGA-GCG**TCCCCT**  
Core -----CACG**CATCT**-----GAAGGAGGA**TTTAC**CAGTA**AGCTGGA**ATTAG-AGCG**TCCCCT**  
Apve -C-----GTT**CGCCT**-----GAAGGAGGA**TTTAC**CAGTA**AGCAGGA**ACTAG-AGCG**TCCCCT**  
Lat j -G----CCATG**CAGCT**-----GAAGGAGGA**TTTAC**TAGTA**AGAGAGA**AGCAG-AGCG**TCTCCCT**  
Laja -----TGTG**TGCCT**-----GAAGGAGGA**TTTAC**TAGTA**AGTGGGC**AATAGAG-CG**CCCCCT**



Syja -----CACATGCT-----GAAGGAGGATTTAGCAGTAGCAGGA AATAGAG-TG TCCCGCT  
 Epme -----CGTGCATCTA-----GAAGGAGGATTTAGCAGTAGCAGAA A-GCAGAGCG TCCCGCT  
 Grse -----CGTACATTC-----AAAGGAGGATTTAGCAGTAGAAGAA AA-TAGAGTG TTCTCCT  
 Clja -----TGTGTGCG-----GAAGGAGGATTTAGAAGTAGAAGTAAGAA A-ATAGAGCG TTCTACT  
 Ogcy -----CGCATATTA-----GAAGGAGGATTTAGCAGTAGCAGAA AA-TAGAGTG TTCTGCT  
 Plna -----CATGCATTT-----GAAGGCGGATTTAGCAGTAGCTGAA AA-TAGAGTG TTCAACT  
 Lema -----CGTCTTTCC-----GAAGGAGGATTTAGCAGTAGCAGGA AA-TAGAGTG TTCTGCT  
 Etzo CG-----TTTATCT-----GAAGGAGGATTTAGCAGTAGCAGGA AAT-AGAGCG TCCCGCT  
 Apse -----TGACAGACAT-----GAAGGAGGATTTAGAAGTAGAGAGGAAACAGAGTG TCCCCCT  
 Epde -----CATGTGTCT-----GAAGGAGGATTTAGCAGTAGCAGGA AA-TAGAGTG TTCCGCT  
 Slja -----TGCATACACT-----GAAGGAGGATTTAGTAGTAGCTGAA AG-CAGAGTG TTCAGCT  
 Bsja -----CATGTACT-----GAAGGAGGATTTAGTAGTAGCAGGA AGTAG-AGTG TCCCGCT  
 Ecna -----TATACCTCT-----GAAGGAGGATTTAGCAGTAGTGGGA A-ATAGAGAG TCCCTCT  
 Cohi -----CATATACT-----GAAGGAGGATTTAGCAGTAGCAGGA A-ATAGAGTG TTCTGCT  
 Caar -----CATGCAGCT-----GAAGGAGGATTTAGCAGTAGCAGAA AA-CAGAGTG TTCCGCT  
 Came -----CATGTAGCT-----GAAGGAGGATTTAGCAGTAGCAGAA AGCAG-AGTG TTCCGCT  
 Mema -----CATGCAATT-----GAAGGAGGATTTAGTAGTAGCAGGA AGTAG-AGTG TCCCGCT  
 Lenu -T----A--ATATTCT-----GAAGGAGGATTTAGCAGTAGTAAAA AACA-GAGAG TTTTACT  
 Plma AC-----GTTTATCC-----GAAGGAGGATTTAGCAGTAGTGGGA AATA-GAGTG TTCCACT  
 Emst -----TGTTATCT-----GAAGGAGGATTTAGCAGTAGCAGGA AA-TAGAGTG TTCCGCT  
 Ptti CA-----CGTATCT-----GAAGGAGGATTTAGCAGTAGCAGAA AATAG-AGCG TTCCGCT  
 Losu CT----T--ACACACA-----GAAGGAGGATTTAGAAGTAGAGCGGAA AATAGA-GTG TTCCGCT  
 Geoy -----TACGCGTT-----GAAGGTGATTTAGTAGTAGCAGTA AACAGA-GTG TGCTGCT  
 Dipi -----CATGCAGTT-----GAAGGAGGATTTAGCAGTAGTAGAA AG-CAGAGTG TTCCACT  
 Pama C-----CGTGCCTCT-----GAAGGAGGATTTAGCAGTAGCAGGA AGTAGA-GCG TTCCACT  
 Leob C-----ATTATCA-----GAAGGAGGATTTAGCAGTAGCAGAA AGCAGA-GCG TTCTGCT  
 Neba -----CAAGCATCC-----AAAGGTGATTTAGCAGTAGGAGGGA AACAGAGTG CCCCCCT  
 Pdpi -----CATGCAGCT-----GAAGGTGATTTAGTAGTAGCGGAA AG-TAGAGTG TTCCGCT  
 Nimi -----CACACGCT-----GAAGGAGGATTTAGCAGTAGCAGGA AATA-GAGCG TCCCGCT  
 Uptr -----GACGATCT-----GAAGGTGATTTAGCAGTAGAGGGGAGCAGA-GTG CCCTTCT  
 Pesc CA-----TTTATCT-----GAAGGAGGATTTAGCAGTAGCAGAA AATAGA-GTG TTCTGCT  
 Baar -----TGTGCATACT-----AAAGGAGGATTTAGCAGTAGCAGGG AAGCAGAGTG TCCCGCT  
 Moar -----TGTGAATCC-----GAAGGAGGATTTAGCAGTAGCAGGA AATAGA-GTG TTCCGCT  
 Toja CA----A--CGCAATT-----GAAGGAGGATTTAGCAGTAGCAGGA AACAG-AGTG TCAGCT  
 Chau -----CGAGTATCT-----GAAGGAGGATTTAGCAGTAGCAAAA AGCA-GAGTG TTTGCT  
 Chse -----CG-CATCT-----GAAGGAGGATTTAGCAGTAGCAGGA AGTA-GAGTG TCCTGCT  
 Enar TA-----CATATCT-----GAAGGAGGATTTAGCAGTAGCAGAA AG-TAGAGTG TCCTGCT  
 Hpty T-----GTTTATCC-----AAAGGAGGATTTAGCAGTAGCAGGA AACA-GAGCG TCCCACT  
 Nana TA-----TTTACCA-----GAAGGAGGATTTAGCAGTAGCAGAG AACA-GAGTG CTCGCT  
 Mcst A-----CGTATATCT-----AAAGGAGGATTTAGCAGTAGCAGAA AA-TAGAGTG TTCCGCT  
 Rhox -----CGTCACAC-----GAAGGAGGATTTAGCAGTAGCAGGA AG-TAGAGTG TCCCGCT  
 Opfa -----CGTATGCT-----GAAGGAGGATTTAGCAGTAGCAGAA AATAG-AGCG TTCTGCT  
 Paar -----TTTCGTGTT-----GAAGGTGATTTAGTAGTAGCAGGA AA-TAGAGTG TTCTGCT  
 Gozo -----CAAGCATCC-----GAAGGAGGATTTAGCAGTAGCAGAA AAT-AGAGAG TTCCGCT  
 Ackr CA-----CGTATATT-----GAAGGTGATTTAGTAGTAGCAGAA AA-TAGAGTG TTCCGCT  
 Elev T-----GTTTGTCT-----AAAGGAGGATTTAGAAGTAGTAAAA AATAG-AGTG TTTTACT  
 Trdu -T-----ATGCATTA-----GAAGGAGGATTTAGCAGTAGCAGAA AATAG-AGCG TTCCGCT  
 Amoc CA-----AGCATTT-----GAAGGTGATTTAGCAGTAGCAAGA AACAGAGTG TTCTGCT  
 Hame -----AAGATGTCT-----GAAGGAGGATTTAGCAGTAGTAGAG AA-TAGAGTG CTCTACT  
 Chso TA-----TTGACTT-----GAAGGTGATTTAGCAGTAGCAGGGGAG TAGAGAG CCCCCT  
 Lyto C-----GTCATCT-----GAAGGAGGATTTAGCAGTAGCAGAA AATA-GAGTG TTCCGCT  
 Encr -----CGTTATCT-----GAAGGAGGATTTAGCAGTAGCAGGA AATA-GAGTG TTCCGCT

|      |             |             |           |       |       |         |            |         |
|------|-------------|-------------|-----------|-------|-------|---------|------------|---------|
| Bvar | CG---CATGT  | TTTAT-----  | GAAGTAGAA | TTTAC | CAGTA | AGCAGGA | AGCA-GAGTG | TCCTGCT |
| Noco | CG-----CA   | CATCTT----- | GAAGGAGGA | TTTAC | CAGTA | AGTAGGA | AGTA-GAGCG | TCCTGCT |
| Chsp | T-----ATTA  | CACCT-----  | AAAGGAGGA | TTTAC | CAGTA | AATAATA | AAC-AGAGTG | TTTTATT |
| Arja | CG-----TA   | CACCT-----  | GAAGGAGGA | TTTAC | CAGTA | AGCAGGA | AA-TAGAGCG | TCCCGCT |
| Pase | TA-----A    | ATGCTT----- | GAAGGTGGA | TTTAC | TAGTA | AGCTGAC | AAATAGTGTG | TCCAGCT |
| Trel | T-----CACC  | AGTCCC----- | CAAGGAGGA | TTTAC | AAGTA | AGTGGGC | AGTAGA-GTG | CCCCCCT |
| Lifa | G-----CATG  | CATCT-----  | GAAGGTGGA | TTTAC | CAGTA | AGCGGAA | ATTAGA-ATG | CTCCGCT |
| Acur | -C---AT-GC  | TGTTT-----  | GAAGGAGGA | TTTAC | CAGTA | AGTAAAA | A-CTAGAGAG | TTTTACT |
| Ampe | -----AG-TG  | CATCT-----  | GAAGGAGGA | TTTAC | CAGTA | AGCAGGA | AAT-AGAGTG | TCCCGCT |
| Urja | -C---A--TC  | TATACT----- | GAAGGAGGA | TTTAC | TAGTA | AGCAAGC | AA-TAGAATG | CCCTGCT |
| Enet | -T---AT--T  | CATT-T----- | GAAGGAGGA | TTTAC | CAGTA | AGTGGAA | AG-CAGAGCG | TTCCACT |
| Ptbr | -T-----ATA  | CACAT-----  | GAAGGAGGA | TTTAC | TAGTA | AATAGAA | AAT-AGAGAG | TTCTATT |
| Safa | GC---T---A  | AACTA-----  | GAAGGAGGA | TTTAC | TAGTA | AGGGAGA | AAT-AGAGTG | TCTCCCT |
| Icae | AC-----GTA  | CATC-C----- | GAAGGAGGA | TTTAC | CAGTA | AGTGGAA | AA-TAGAGTG | TTCCACT |
| Asmi | TT---T---A  | CGTCA-----  | GAAGGAGGA | TTTAC | CAGTA | AGTGAGA | AACATGAGTG | TCTCACT |
| Foal | CAC-----CA  | CTTTC-----  | AAAGGAGGA | TTTAC | CAGTA | AGAGGGC | AAC-AGAGTG | CCCCCCT |
| Drze | -----TTAA   | CAACT-----  | GAAGGAGGA | TTTAC | CAGTA | AGTGGGC | GGT-AGAGCA | CCCCACT |
| Rhas | TA-----AC   | TAT-CT----- | AAAGGAGGA | TTTAC | CAGTA | AGGAGGA | AAATAGAGCG | TTCCCTT |
| Elac | TC---A--GA  | CATCT-----  | GAAGGAGGA | TTTAC | CAGTA | AGAAGGA | AAATAGAGCG | TTCCCTT |
| Kugu | CC-----ATT  | CGCCT-----  | GAAGGAGGA | TTTAC | CAGTA | AGAGGAA | AATAG-AGCG | TTCCACT |
| Plor | -----ACACA  | TGTCAC----- | AAAGGAGGA | TTTAC | TAGTA | AGCAGGA | AAT-AGAGAG | TTCCGCT |
| Sgun | TA-----AG   | TATCT-----  | AAAGGAGGA | TTTAC | CAGTA | AGCAGAA | AATAG-AGCG | TTCCGCT |
| Zaco | TA-----CA   | TATCT-----  | GAAGGAGGA | TTTAC | CAGTA | AGCAAAA | AATAG-AGTG | TTTTGCT |
| Zbfl | TA-----CG   | TATCC-----  | GAAGGAGGA | TTTAC | CAGTA | AGCAGAA | AATAG-AGTG | TTCCGCT |
| Spba | -----TATG   | CAACT-----  | GAAGGAGGA | TTTAC | TAGTA | AGCCGGA | AACAG-AGTG | TCCCGCT |
| Game | AC---AT--A  | CATCT-----  | GAAGGAGGA | TTTAC | CAGTA | AGTGGAA | AATAG-AGTG | TCCCACT |
| Thth | A-----CGTC  | CATCT-----  | GAAGGAGGA | TTTAC | CAGTA | AGTGGAA | AATAG-AGTG | TTCCACT |
| Xigl | -T-----ATG  | CGACT-----  | GAAGGAGGA | TTTAC | CAGTA | AGCAGAA | AGCA-GAGCG | TCCCGCT |
| Hyja | A-----CGTA  | CATC-T----- | GAAGGAGGA | TTTAC | CAGTA | AGGGGAA | AATA-GAGTG | TTCCCTT |
| Psan | AA---G--TA  | CATCT-----  | GAAGGAGGA | CTTAC | CAGTA | AGTGGAA | AATAG----- | -----   |
| Cupa | TT-----GTA  | CATCC-----  | GAAGGAGGA | TTTAC | CAGTA | AGTGGAA | AATA-GAGTG | TTCCACT |
| Mpch | -C-----A-TG | TGTTT-----  | AAAGGAGGA | TTTAC | CAGTA | AGCAGAA | AATA-GAGCG | TTCAGCT |
| Char | -----TGTT   | CATCC-----  | GAAGGAGGA | TTTAC | CAGTA | AGCCGAC | AAT-AGAGTG | CTCCACT |
| Pser | -CATGCATGTA | TATTATT---- | GAAGGCCGA | TTTAC | TAGTA | AGCAGGA | AATAG-AGAG | TCCCGCT |
| Prol | CAT-----G   | CAATT-----  | GAAGGAGGA | TTTAC | TAGTA | AGCAGGC | AATA-GAGTG | TCCCGCT |
| Plbi | -CA-----TG  | CAACT-----  | GAAGGAGGA | TTTAC | CAGTA | AGCAGGA | AGTAG-AGCG | TCCCGCT |
| Calu | CA-----CG   | AGA--TT---- | GAAGGAGGA | TTTAC | TAGTA | AGCAGGC | AACAGAGC-G | CCCTCCT |
| Papa | ACA-----TA  | TGC--CT---- | GAAGGAGGA | TTTAC | CAGTA | AGTAGGA | AATAG-AGTG | TCCACTT |
| Sufr | -AA---T---A | CATCT-----  | GAAGGAGGA | TTTAC | TAGTA | AGAGAAG | AGTAGA-GAG | CTTCTCT |
| Stci | TAC-----A   | TATCT-----  | GAAGGAGGA | TTTAC | TAGTA | AGAAGAG | AATAGA-GTG | CCCTTCT |
| Taru | -TG-----CA  | CACCC-----  | GAAGGAGGA | TTTAC | CAGTA | AGCAAGA | AATAGA-GTG | TCATGCT |
| Rala | CA-----TA   | CATCT-----  | GAAGGAGGA | TTTAC | CAGTA | AGTGAAG | AATAGAG-CG | TTCACTT |

\* \* \* \* \*

|      | 30'           | D          | 41  | 42  | !    | HVR | !    |         |                |
|------|---------------|------------|-----|-----|------|-----|------|---------|----------------|
| Scca | GAAACT--GGCTC | TGGGGCGCGC | ACA | CAC | CGCC | CG  | TCAC | TCTCCTC | AATAAATACACT-- |
| Muma | GAAATT--GGCTC | TGGGATGCGC | ACA | CAC | CGCC | CG  | TCAC | TCTCCTC | AAA-----AACCTA |
| Erca | GAAGCC-CGGCGC | TGAAGCGCGC | ACA | CAC | CGCC | CG  | TCAC | TCTCCTC | G-----AAACCAT  |
| Pose | GAAGCTT-GGCGC | TGAAGCGCGC | ACA | CAC | CGCC | CG  | TCAC | TCTCCTC | GAAAC---AACT-- |
| Actr | GAAGCC--GGCTA | TGGGGCGCGC | ACA | CAC | CGCC | CG  | TCAC | TCTCCTC | AAAG---GAACA-- |
| Scal | GAAGCC--GGCTA | TGGGGCGCGC | ACA | CAC | CGCC | CG  | TCAC | TCTCCTC | AAAGGGACGC---- |
| Posp | GAAGC--CGGCTA | TGGGGCGCGC | ACA | CAC | CGCC | CG  | TCAC | TCTCCTC | A-----AAGGAA   |
| Atsp | GAAGTT--GGCTC | TGGGACGCGC | ACA | CAC | CGCC | CG  | TCAC | TCTCCTC | GA-----ACATAA  |
| Leoc | GAA-GT-TGGCTC | TGGGACGCGT | ACA | CAC | CGCC | CG  | TCAC | CCTCCTC | G-AATTGAACCTAC |
| Amca | GAA-GC-CGGCTC | TGAGGCGCGC | ACA | CAC | CGCC | CG  | TCAC | TCTCCTC | A--AAT-TGGACAA |
| Osbi | GAAACT--GGCTC | TGAGGCGCGC | ACA | CAC | CGCC | CG  | TCAC | TCTCCAC | T--AAACATTTTAT |
| Pabu | GAAACC--GGCTC | TGGAGCGCGC | ACA | CAC | CGCC | CG  | TCAC | TCTCCAC | T--ACATCCATTAA |
| Hial | GAAGCC--GGCTC | TGGGACGCGC | ACA | CAC | CGCC | CG  | TCAC | TCTCCCC | TAACATGGTACAAA |
| Elha | GAAATA--GGCCC | TGGGGCGCGC | ACA | CAC | CGCC | CG  | TCAC | TCTCCTC | AAAACACACACC-- |
| Mlcy | GAAACC--GGCCA | TGGGACGCGC | ACA | CAC | CGCC | CG  | TCAC | TCTCCTC | A-----AAACAAC  |
| Algl | GAAGCT--GGCTC | TAAGGCACGC | ACA | CAC | CGCC | CG  | TCAC | TCTCCTC | GAATTACATGAGCA |
| Ptgi | GAAACT--GGCTC | TGAGGCGCGC | ACA | CAC | CGCC | CG  | TCAC | TCTCCTC | AAGTCATAAAAT-- |
| Alaf | GAA-AT-CGGCTC | TGAGGCGCGT | ACA | CAC | CGCC | CG  | TCAC | TCTCTTC | ACCAGTCAAGCAAC |
| Nock | GAAATT--GGCTC | TGAGGCGCGT | ACA | CAC | CGCC | CG  | TCAC | TCTCTTC | ACC----AGTCAAG |
| Anja | GAA-AC-AGGCTC | TGAGGCGCGT | ACA | CAC | CGCC | CG  | TCAC | TCTCCTC | G-----AACAAAT  |
| Gyki | GAA-AC-CGGCCC | TGAGGCGCGT | ACA | CAC | CGCC | CG  | TCAC | TCTCCTC | GAA-----AAA-   |
| Syka | GAAGCC--GGCTC | TAAGGCGCGT | ACA | CAC | CGCC | CG  | TCAC | TCTCCTC | G--AA-TAAAT-TC |
| Opma | GAAACT--GGCCC | TGAAGCGCGT | ACA | TAC | CGCC | CG  | TCAC | CCTCCTT | TA-----GCC-A   |
| Comy | GAA-GT-TGGCTC | TGAGGCGCGT | ACA | CAC | CGCC | CG  | TCAC | TCTCCTC | A-AGGTAAGTAAAT |
| Sasp | GAAACC--GGCCC | TGAGATACGT | ACA | CAC | CGCC | CG  | TCAC | CCTCCTC | A-----ACCGCAC  |
| Eupe | GAAGCT--GGCCC | TGAGGCGCGT | ACA | CAC | CGCC | CG  | TCAC | CCTCCTC | --AATCAAACCAA  |
| Enja | GAAGCC--GGCTC | TGAGGCGCGC | ACA | CAC | CGCC | CG  | TCAC | TCTCCCC | AACAACCCTAAT-- |
| Same | GAAGCC--GGCTC | TGAAGCGCGC | ACA | CAC | CGCC | CG  | TCAC | TCTCCCC | GACAACTACTCA-- |
| Chch | GAATCC--GGCTC | TGAGGCGCGC | ACA | CAC | CGCC | CG  | TCAC | TCTCCCC | AACT---CTAGGCC |
| Grgr | GAATTT--GGCTC | TGAGGTGTGC | ACA | CAC | CGCC | CG  | TCAC | CCTCCCC | TCCAGGACCTGTCC |
| Caau | GAACCC--GGCTC | TGAGACGCGT | ACA | CAC | CGCC | CG  | TCAC | TCTCCCC | TGTC---AAAATGC |
| Cyca | GAACCC--GGCTC | TGAGACGCGT | ACA | CAC | CGCC | CG  | TCAC | TCTCCCC | TGTCAAAACGCA-- |
| Dare | GAACCC--GGCTC | TAAGGCGCGT | ACA | CAC | CGCC | CG  | TCAC | TCCCTCC | G--GTCA---ATTG |
| Cost | GAA-CC-CGGCTC | TGAGGCGCGT | ACA | CAC | CGCC | CG  | TCAC | TCTCCCC | G---CCAAATGCAA |
| Leec | GAACTC--GGCTC | TGAGGCGCGT | ACA | CAC | CGCC | CG  | TCAC | TCTCCCC | TGTCACC--TAG-- |
| CrIa | GAACCC--GGCTC | TGAGGCGCGT | ACA | CAC | CGCC | CG  | TCAC | TCTCCCC | T-----GTAATAG  |
| Clmc | GAA-CC-AGGCTC | TGAGACGCGC | ACA | CAC | CGCC | CG  | TCAC | TCTCCCC | A--TCA-CC-CAAT |
| Phin | GAA-AC-AGGCTC | TGAGACGCGT | ACA | CAC | CGCC | CG  | TCAC | CCTCCCC | A-CCCCCCCCACC  |
| Icpu | GAATTA--GGCTC | TGAGACGCGC | ACA | CAC | CGCC | CG  | TCAC | TCTCCCC | TCT-----GTATAT |
| Psto | GAATTA--GGCTC | TGAGACGCGC | ACA | CAC | CGCC | CG  | TCAC | TCTCCCC | ACA-----TTTATA |
| Cora | GAACCA--GGCTC | TGAGACACGC | ACA | CAC | CGCC | CG  | TCAC | TCTCCCC | T--ACACAAAACCC |
| Eisp | GAATTA--GGCTC | TGGAGCGCGC | ACA | CAC | CGCC | CG  | TCAC | CCTCCCC | TCATTA-ATTAT-- |
| Apal | GAA-TA--GGCTC | TGAGATGAGC | ACA | CAC | CGCC | CG  | TCAC | CCCCTCC | T---CTCAACTC-A |
| EsLu | GAAACT--GGCTC | TGAAGCGCGC | ACA | CAC | CGCC | CG  | TCAC | TCTCTCC | AAG-TTCAACCCTA |
| Dape | GAAACT--GGCTC | TGAGGCGCGC | ACA | CAC | CGCC | CG  | TCAC | TCTCTCC | AA-----G---T   |
| Glse | GAAACT--GGCTC | TGAGGCGCGC | ACA | CAC | CGCC | GG  | TCAC | TCTCCCC | GGGT---TCACTTT |
| Naar | GAA-AC-TGGCTC | TGAGGCGCGC | ACA | CAC | CGCC | CG  | TCAC | TCTCCCC | AAGTCCGCTTTCCC |
| Baoc | GAAACT--GGCTC | TGAGGCGCGC | ACA | CAC | CGCC | CG  | TCAC | TCTCCCC | AAGTCC--GCTT-- |
| Opso | GAAAC--TGGCTC | TGAGGCGCGC | ACA | CAC | CGCC | CG  | TCAC | TCTCCCC | A-----AGTCCA   |
| Alte | GAATCC--GGCTC | TGAGGCGCGC | ACA | CAC | CGCC | CG  | TCAC | TCTCCCC | GAA-----CCC-CA |
| Plap | GAATCC--GGCTC | TGAGGCGCGC | ACA | CAC | CGCC | CG  | TCAC | TCTCCCC | GCACCC--TCAA-- |

Plal GAAGCC--GGCTC**TGAGGCGCGC**ACA**TAC**CGCC**CG**TCAC**TCTCTCC**A-----GG---TT  
 Sami GAAGCC--GGCTC**TGAGGCGCGT**ACA**TAC**CGCC**CG**TCAC**TCTCTCC**G--GG---TTCAC**T**  
 Rere GAAGCC--GGCTC**TGAGGCGCGC**ACA**CAC**CGCC**CG**TCAC**TCTCCCC**AAATTCACCAA--TT  
 Gama GAAACT--GGCTC**TGAGGCGCGC**ACA**CAC**CGCC**CG**TCAC**TCTCCCC**A--AGTCTATTTTT  
 Onmy GAA-AC-TGGCTC**TGAGGCGCGC**ACA**CAC**CGCC**CG**TCAC**TCTCCCC**AAGTTC----AACC  
 Sasa GAA-AC-TGGCTC**TGAGGCGCGC**ACA**CAC**CGCC**CG**TCAC**TCTCCCC**A--AGTTCAATTA  
 Cola GAAACT--GGCTC**TGAGGCGCGC**ACA**CAC**CGCC**CG**TCAC**TCTCCCC**A-----AG--TTC  
 Dita GAAGTT--GGCTC**TGAGGCGCGT**ACA**CAC**CGCC**CG**TCAC**TCTCCCC**GAGT---TCGCCAC  
 Gogr GAAACA--GGGCC**TGAAGCGCGT**ACA**CAC**CGCC**CG**TCAC**TCCCCC**T-CCCTCAACAC--  
 Chsl GAAGCA--GGATA**TGAGGTGCGT**ACA**CAC**CGCC**CG**TCAC**CCTCCGC**TAGT-----TCA  
 Atja GAAACT--GGCTC**TGAAGCACGT**ACA**CAC**CGCC**CG**TCAC**TCTCCCC**AA-----GTTCGT  
 lido GAAACT--GGCTC**TGAAGCACGT**ACA**CAC**CGCC**CG**TCAC**TCTCCCC**AAGTCCATTA--A  
 Auja GAA-AC-CGGCTC**TGAAGCGCGC**ACA**CAC**CGCC**CG**TCAC**TCTCCCC**A-----AATCAT  
 Chag GAAGCC--GGCTC**TGAAGCGCGC**ACA**CAC**CGCC**CG**TCAC**TCTCCCC**AATTCCGACCT--  
 Hami GAA-AC-TGGCTC**TGAAGCGCGT**ACA**CAC**CGCC**CG**TCAC**TCTCCCC**G--AATATTATT--  
 Saun GAAACC--GGCTC**TGAAGCGCGT**ACA**CAC**CGCC**CG**TCAC**TCTCCCC**GAATACCCTAT-TC  
 Nema GAAACT--GGCCC**TTAAGCGCGC**ACA**CAC**CGCC**CG**TCAC**TCTCCCC**G--AA-TCCAAATT  
 Disp GAAATT--GGCCC**TTAAGCGCGC**ACA**CAC**CGCC**CG**TCAC**TCTCCCC**GA-----ACCCAA  
 Myaf GAA-GC-CGGCCC**TTAAGCGCGT**ACA**CAC**CGCC**CG**TCAC**TCTCCCC**AAGTCT---ACC-  
 Lagu GAAGCC--GGCTC**TGAAGTGC**ACA**CAC**CGCC**CG**TCAC**TCTCCCC**CGCCCC-CGCAA--  
 Trtr GAAGCC--GGCTC**TGAGGCGCGC**ACA**TAC**CGCC**CG**TCGC**TCTCCCC**C--AATGTTTACCA  
 Zucr GAAGCC--GGCTC**TGAGGCGCGC**ACA**TAC**CGCC**CG**TCGC**TCTCCCC**CAGTGTTTATGCTA  
 Pxja GAAACT--GGCCC**TGAAGCGCGC**ACA**CAC**CGCC**CG**TCAC**TCTCCCC**A-----AGTTTAT  
 Pxlo GAAACT--GGCCC**TGAAGCGCGC**ACA**CAC**CGCC**CG**TCAC**TCTCCCC**AAGTTTATTA--  
 Pctr GAAACC--GGCCC**TAAAGCGCGC**ACA**CAC**CGCC**CG**TCAC**TCTCTCC**AAGCGCAGGAAA--  
 Apsa GAAACT--GGCCC**TGAAGCGCGC**ACA**CAC**CGCC**CG**TCAC**TCTCCCC**A--AATAAGCA--C  
 Cabe GAAACC--GGCCC**TAAAGCGTGC**ACA**CAC**CGCC**CG**TCAC**CCTCCCC**A--AAGTTGCACAC  
 Bzze GAAACT--GGCCC**TGAAGCGCGC**ACA**CAC**CGCC**CG**TCAC**TCTCCCC**---AAAGACTTTTA  
 Siim GAA-AC-TGGCTC**TGAAGCGCGC**ACA**CAC**CGCC**CG**TCAC**TCTCCCC**TAGACACCTATAAA  
 Ctru GAAACC--GGCCC**TGAAGCGCGC**ACA**CAC**CGCC**CG**TCAC**TCTCCCC**A-----AGCCCTC  
 Dpbr GAAAC--CGGCCC**TGAAGCGCGC**ACA**CAC**CGCC**CG**TCAC**TCTCCCC**A-----AGCCCC  
 Caki GAA-AA-TGGCCC**TAAAGCGCGT**ACA**GAC**CGCC**CG**TCAC**TCTCCCC**GAA-----A---  
 Phja GAATAC--GGACC**TAAAGCGCGT**ACA**CAC**CGCC**CG**TCAC**CCTCTCC**---GATTATTTTT  
 Brsp GAA-TT-AGGCCC**TAAAGCGCGT**ACA**TAC**CGCC**CG**TCAC**CCTCCCC**C-----TTCCC  
 Gamo GAA-AA-CGGCCC**TGAAGCGCGC**ACA**CAC**CGCC**CG**TCAC**TCTCTCC**AAATA----AACC  
 Lolo GAAAAC--GGCCC**TGAAGCGCGC**ACA**CAC**CGCC**CG**TCAC**TCTCTCC**AAA----TAGACC  
 Batr GAACAC-AAACCT**TAAAGTGC**ACA**AAC**TGCC**CG**TCAC**CCCCCTC**A-----CA----  
 Prmy GAAATT--GGCAC**TAAAGCATGC**ACA**TAC**CGCC**CG**TCAC**CCTCCCC**A-----TCTTTCC  
 Loli GAAACATCGGCTC**TAAAGCGCGC**ACA**CAC**CGCC**CG**TCAC**TCTCCCC**G-----AGCTAT  
 Loam GAAAAT--GGCCC**TGAAGCGCGC**ACA**CAC**CGCC**CG**TCAC**TCTCTCC**---AAGCTAACGT-  
 Chab GAAAC--TGGCCC**TTAAGCGCGC**ACA**CAC**CGCC**CG**TCAC**TCTCCCC**A-----AGCTGA  
 Chto GAAAC--TGGCCC**TTAAGCGCGC**ACA**CAC**CGCC**CG**TCAC**TCTCCCC**A-----AGCTGA  
 Majo GAAACC--GGCTC**TTGAGCGTGC**ACA**CAT**CGCC**CG**TCAC**TCTCCCC**GA-----ACCCGT  
 Hlst GAA-AC-TGGCCC**TGAAGCGAGC**ACA**CAC**CGCC**CG**TCAC**TCTCCCC**CGCCTA--AAATCT  
 Clpe GAAGCC--GGCCC**TAAAGCACGT**ACA**CAC**CGCC**CG**TCAC**TCTCCCC**GAACA---GTAA--  
 Mlmr GAACCT--GGACC**TAAAGCACGT**ACA**CAC**CGCC**CG**TCAC**TCTCCCC**CA-----AA-CA  
 Cr cr GAAGCC--GGCTC**TAAAGCGCGC**ACA**CAC**CGCC**CG**TCAC**TCTCCCC**A--AAACATAA-TC  
 Muce GAAATC--GGCTC**TAAAGCGCGC**ACA**CAC**CGCC**CG**TCAC**TCTCTCC**---AAAACATACT-  
 Bege GAAAC--TGGCCC**TGAAGCGCGC**ACA**CAC**CGCC**CG**TCAC**TCTCCCC**A-----AGCCAT  
 Mela GAAACC--GGCCC**TGAAGCGCGC**ACA**CAC**CGCC**CG**TCAC**TCTCCCC**G--A-ATACAGGCC  
 Hats GAAGC--TGGCCC**TGAAGCGCGC**ACA**CAC**CGCC**CG**TCAC**TCTCCCC**A-----AGCCAC  
 Or la GAAACT--GGCCC**TGAAGCGCGC**ACA**CAC**CGCC**CG**TCAC**TCTCCCC**AAATCCAGTT----

Cosa GAAACT--GGCCC**TGAAGCGCGC**ACA**C**CGCC**CG**TCAC**TCTCCCC**AAAA---A-TAAAC  
 Exsp GAAACT--GGCCC**TGAAGCGCGC**ACA**C**CGCC**CG**TCAC**CCTCCCC**A-----AACCCC  
 Depa GAAACT-TGGCTC**TGAAGCGCGC**ACA**C**CGCC**CG**TCAC**TCTCCCC**C-----AAAAAC  
 Rima GAAACC--GGCCC**TAAAGCGAGC**ACA**C**CGCC**CG**TCAC**TCTCTCC**TAGTCTACCGCCCC  
 Fuol GAA-TA-CGGCCC**TGAAGCGCGC**ACA**C**CGCC**CG**TCAC**TCTCCCC**A-----GGCTTA  
 Gmaf GAAACC--GGCCC**TGAAGCGCGC**ACA**C**CGCC**CG**TCAC**TCTCCCC**A-----AGTTCTT  
 Xeei GAACCT--GGCCC**TGAAGCGCGC**ACA**C**CGCC**CG**TCAC**TCTCCCC**AAGC---C---AGT  
 Pros GAAATT--GGCCC**TGAAGCGCGC**ACA**C**CGCC**CG**TCAC**TCTCTCC**C--GGCCTACCCTT  
 Scmi GAAACC--GGCCC**TGAAGCACGC**ACA**T**CGCC**CG**TCCC**CCTCTCC**GAGCTT--AGAA--  
 Rolo GAAATT--GGCCC**TGAAGCGCGC**ACA**C**CGCC**CG**TCAC**TCTCCCC**AAG-----CCC---  
 Cere GAAACA--GGCCC**TAAAGCGCGC**ACA**C**CGCC**CG**TCAC**TCTCCCC**---AAACCCAC--C  
 Daga GAAACT--GGCCC**TAAAGCGCGC**ACA**C**CGCC**CG**TCAC**TCTCCCC**AA----AACCC---  
 Anco GAAACT--GGCCC**TGAAGCGCGC**ACA**C**CGCC**CG**TCAC**TCTCCCC**A--AAAA-TTTTA-  
 Dmve GAAGCT--GGCCC**TGAAGCGTGC**ACA**C**CGCC**CG**TCAC**TCTCTCC**GA-----GCCGAC  
 Dmar GAAGCT--GGCCC**TGAAGCGTGC**ACA**C**CGCC**CG**TCAC**TCTCTCC**A-----AAGCACT  
 Anka GAAACT--GGCCC**TGAAGCGCGC**ACA**C**CGCC**CG**TCAC**TCTCCCC**AAAA---AACTAAA  
 Moja GAAACT--GGCCC**TGAAGCGCGC**ACA**C**CGCC**CG**TCAC**TCTCCCC**A-----AAAAT-T  
 Hoja GAAACT--GGCCC**TGAAGCGCGC**ACA**C**CGCC**CG**TCAC**TCTCCCC**A--AAAAACTTTC-  
 Bede GAAACC--GGCCC**TGAAGCGCGC**ACA**C**CGCC**CG**TCAC**TCTCTCC**---AAGCTTAT--T  
 Bsp GAAACC--GGCCC**TGAAGCGCGC**ACA**C**CGCC**CG**TCAC**TCTCTCC**AA-----GCT-TA  
 Mysp GAAACT--GGCCC**TGAAGCGCGT**ACA**C**CGCC**CG**TCAC**TCTCCCC**AA-----ACAAA  
 Osja GAAACT--GGCCC**TGAAGCGCGC**ACA**C**CGCC**CG**TCAC**TCTCCCC**AAACCAAACCCA--  
 Sgro GAAACC--GGCCC**TGAAGCGCGC**ACA**C**CGCC**CG**TCAC**TCTCCCC**AA-----ACTCAA  
 Pzpa GAAACT--GGCCC**TGAAGCGCGT**ACA**C**CGCC**CG**TCAC**TCTCCCC**AA-----ATTACC  
 Zeja GAAACT--GGCCA**TGAAGCGCGT**ACA**T**CGCC**CG**TCAC**TCTCCCC**AA-----ATTACC  
 Zzne GAAATT--GGCCC**TGAAGCGCGC**ACA**C**CGCC**CG**TCAC**TCTCCCC**G-----AAT-TAT  
 Zefa GAAACT--GGCCC**TGAAGCGCGC**ACA**C**CGCC**CG**TCAC**TCTCCCC**TGTTGGCCCC---  
 Acni GAAAC--TGGCCC**TGAAGCGCGC**ACA**C**CGCC**CG**TCAC**TCTCCCC**A-----AAT---  
 Ncrh GAAACT--GGCCC**TGAAGCGCGC**ACA**C**CGCC**CG**TCAC**TCTCCCC**A--AATTGCCCTA  
 Agca GAAACT--GGCCC**TGAAGCGCGC**ACA**C**CGCC**CG**TCAC**TCTCCCC**GAATTATTATAACT  
 Hydy GAAACC--GGCCC**TGAAGCGCGC**ACA**C**CGCC**CG**TCAC**TCTCCCC**GAGCCT-AATTT--  
 Gsac GAAATT--GGCCC**TGAAGCGCGC**ACA**C**CGCC**CG**TCAC**TCTCCCC**AA-GCCTAACAA--  
 Pevo GAA-AC-AGGCC**TGAAGCGCGC**ACA**C**CGCC**CG**TCAC**TCTCCCC**A-GTGT-AACAA--  
 Hiku GAA-AT-TGGCTC**TAAAGCGCGC**ACA**C**CGCC**CG**TCAC**TCTCCCC**AATAAT---ATA-  
 Inpa GAAACC--GGCCC**TTAAGCGCGC**ACA**C**CGCC**CG**TCAC**TCTCCCC**AACC---CACCAA  
 Auch GAAGCA--GGCCA**GAAAGCGCGC**ACA**C**CGCC**CG**TCAC**TCTCCCT**TAGCCACATACCAC  
 Fico GAAACA--GGCCC**TGAAGCGCGC**ACA**C**CGCC**CG**TCAC**TCTCCCC**TATTTCTACACACA  
 Macs GAAACT--GGCCC**TGAAGCGCGC**ACA**C**CGCC**CG**TCAC**TCTCCCC**AGAC-TACTAAC--  
 Moal GAAACC--GGCCC**TAAAGCGCGT**ACA**C**CGCC**CG**TCAC**TCTCCCC**AAACAATCACATCA  
 Syma GAAACT--GGCCC**TAAAGCGCGC**ACA**C**CGCC**CG**TCAC**TCTCCCC**AAACAATCTCAA--  
 Mafr GAAACC--GGTTC**TAAAGCGCGC**ACA**C**CGCC**CG**TCAC**TCTCCCC**AAACCA--CCAT--  
 Dcpe GAAACC--GGCAC**TGAAGCGAGT**ACA**C**CGCC**CG**TCAC**TCTCCCC**G--ATGGCTCCACC  
 Dcti GAA-AA-CGGCAC**TGAAGCGAGT**ACA**T**CGCC**CG**TCAC**TCTCCCC**G---ATGG-CTCCA  
 Hehi GAAATC--GGCCC**TGAAGCGCGC**ACA**C**CGCC**CG**TCAC**TCTCCCC**A-----AGCTTAC  
 Stam GAAATT--GGCCC**TGAAGCGCGC**ACA**C**CGCC**CG**TCAC**TCTCCCC**A--AG---CTTACA  
 Hogi GAAACT--GGCCC**TGAAGCGCGC**ACA**C**CGCC**CG**TCAC**TCTCCCC**AA--AAACCGTA--  
 Erzo GAAATT--GGCCC**TGAAGCGCGC**ACA**C**CGCC**CG**TCAC**TCTCCCC**A-----AGCCTGC  
 Hxot GAAATC--GGCCC**TGAAGCGCGC**ACA**C**CGCC**CG**TCAC**TCTCCCC**G-----AAAACAC  
 Core GAA-AT-TGGCCC**TGAAGCGCGC**ACA**C**CGCC**CG**TCAC**TCTCCCC**A-----AAAGCCC  
 Apve GAAACT--GGCCC**TGAAGCGCGC**ACA**C**CGCC**CG**TCAC**TCTCCCC**AAAACCAAAA--C  
 Latj GAAACC--GGCTC**TTAAGCGCGC**ACA**C**CGCC**CG**TCAC**CCTCCCC**GA-----GCACCC  
 Laja GAA-AT-TGGCCC**TGAAGCGCGC**ACA**C**CGCC**CG**TCAC**TCTCCCC**A-AAAT-TACAAGT



Syja GAA-AT-CGGCCC TGAAGCGCGT ACATAC CGCC CG TCAC TCTCCCC GAACCT--TAATAT  
 Epme GAAATT--GGCCC TGAAGCGCGC ACACAC CGCC CG TCAC TCTCTCC AAC---ATGTCTT  
 Grse GAAACA--GGCTC TGAAGCGCGC ACACAC CGCC CG TCAC TCTCCCC ---AAGCCCGC-T  
 Clja GAACCC--GGCCC TGAAGCGTGT ACACAC CGCC CG TCGC TCCCCC GAGC---TT-TATT  
 Ogcy GAA-GC-AGGCC TGAAGCGCGT ACACAC CGCC CG TCAC TCTCCCC GGAATA----AAT-  
 Plna GAA-GC-AGGCAC TGAAGCGCGT ACATAC CGCC CG TCAC CCTCGCC G-AGTCTATTAAC  
 Lema GAA-AT-TGGCCC TGAAGCGCGC ACACAC CGCC CG TCAC TCTCCCC GAGCTC----AC--  
 Etzo GAAATT--GGCCC TGAAGCGCGC ACACAC CGCC CG TCAC TCTCCCC A-----AGCTAC  
 Apse GAA-A--TGGTTC TGAAGCGTGC ACACAC CGCC CG TCAC TCTCCCC A--AGTTAGAATAT  
 Epde GAAATC--GGCCC TGAAGCGCGC ACACAC CGCC CG TCAC TCTCCCC AAGCCCCATAAATT  
 Slja GAAATC--GGCTC TGAAGCGCGC ACACAC CGCC CG TCAC TCTCTCC GATAATTGAAA--  
 Bsja GAAACT--GGCTC TGGAGCGCGC ACACAC CGCC CG TCAC TCTCCCC ---GAG--CTATAG  
 Ecna GAAAAT--GGCTC TAAAGCGCGC ACACAC CGCC CG TCAC CCTCCCC AA-----GC--AC  
 Cohi GAAGCC--GGCTC TTAAGCGCGT ACATAC CGCC CG TCAC CCTCGCC AAGCCCTACCAA--  
 Caar GAAACC--GGCTC TTAAGCGCGC ACACAC CGCC CG TCAC CCTCCCC AA-----GCACCT  
 Came GAAGCC--GGCTC TTAAGCGCGC ACACAC CGCC CG TCAC CCTCCCC AAGC---AACTGGA  
 Mema GAAACC--GGCCC TAAAGCATGC ACACAC CGCC CG TCAC CCTCCCC GAACC-CACAAC--  
 Lenu GAAGAT--GGCCC CGAAGCGCGC ACACAC CGCC CG TCAC TCTCCCC A--AA--TACCCTA  
 Plma GAAATC--GGCTC TGAAGTGCCT ACACAC CGCC CG TCAC TCTCCCC AAGC---TGACCAG  
 Emst GAA-AT-CGGCCC TGAAGCGCGC ACACAC CGCC CG TCAC TCTCCCC G-AGTTACAACT  
 Ptti GAA-AC-CGGCCC TGAAGCGCGC ACACAC CGCC CG TCAC TCTCCCC G--AGC-TT-ACAA  
 Losu GAACCC--GGCTC TGAAGCGCGC ACATAC CGCC CG TCAC TCTCTCC A-----AGCCCT  
 Geoy GAAACT--GGCTC TGAAGCGCGC ACACAC CGCC CG TCAC TCTCCCC AAGC---AACTTTT  
 Dipi GAAAAT--GGCCC TGAAGCGCGC ACACAC CGCC CG TCAC TCTCCCC G--AGTCCCCAAA  
 Pama GAAACC--GGCTC TTAAGCGCGC ACACAC CGCC CG TCAC TCTCCCC GA-----AAC-T  
 Leob GAAACT--GGCCC TGAAGCGCGC ACACAC CGCC CG TCAC TCTCCCC G-----AGCTTTC  
 Neba GAAGAC--GGCCC TGAAGTGCCT ACACAC CGCC CG TCAC TCTCCCC A--AGCACATTCAT  
 Pdpi GAAATT--GGCCC TAAAGCGCGT ACACAC CGCC CG TCGC CCTCTCC GGCCCCACACA--  
 Nimi GAAATT--GGCCC TGAAGCGCGC ACACAC CGCC CG TCAC CCTCCCC GAGACTAATCAA--  
 Uptr GAAATC--GGCTC TTGAGCGTGC ACACAT CGCC CG TCAC TCTCCCC GAAC---CCGTCTA  
 Pesc GAAGTC--GGCCC TGAAGCGCGC ACACAC CGCC CG TCAC TCTCCCC A-----AAAGC-C  
 Baar GAAGCC--GGCCC TGAAGCACGT ACACAC CGCC CG TCAC TCTCCCC AA-----ACGACC  
 Moar GAAACT--GGCCC TGAAGCGCGC ACACAC CGCC CG TCAC TCTCCCC GAGCTT--ACAAG-  
 Toja GAAACC--GGCTC TTGAGCGCGC ACACAC CGCC CG TCAC CCTCCCC A-----AGTCT-A  
 Chau GAAATT--GGCCC TGAAGCGTGC ACACAC CGCC CG TCAC TCTCTCC GAACTAA-AACT--  
 Chse GAAGAC--GGCTC TGAAGCGCGC ACACAC CGCC CG TCAC TCTCCCC GAG-----CTA---  
 Enar GAA-AC-TGGCCC TGAAGCGCGC ACACAC CGCC CG TCAC TCTCCCC A-----AGCTCC  
 Hpty GAAACC--GGCCC TGAAGCGCGC ACACAC CGCC CG TCAC TCTCCCC CAAACCTCTAAA--  
 Nana GAAAT--CGGCTC TAAAGCGCGC ACACAC CGCC CG TCAC TCTCCCC G-----AAAAAC  
 Mcst GAAATT--GGCTC TGAAGCGCGC ACACAC CGCC CG TCAC TCTCCCC AAATTATAAAAA--  
 Rhox GAAATT--GGCCC TGAAGCGCGC ACACAC CGCC CG TCAT TCTCCCC GAGCTTAAATTT--  
 Opfa GAAATT--GGCCC TGAAGCGCGC ACACAC CGCC CG TCAC TCTCCCC ---GAGCATAGCA  
 Paar GAA-AC-CGGCCC TGAAGCGCGC ACACAC CGCC CG TCAC TCTCCCC ATGCATAAACTTCC  
 Gozo GAAACC--GGCCC TGAAGCGCGC ACACAC CGCC CG TCAC TCTCCCC A--AATCTACAAAA  
 Ackr GAAACT--GGCCC TAAAGCACGC ACACAC CGCC CG TCAC TCTCCCC GA-----GCT  
 Elev GAAACT--GGCCC TAAAGCACGC ACACAC CGCC CG TCAC TCTCTCC A--AAA---ACCC  
 Trdu GAAATC--GGCCC TGAAGCGCGC ACACAC CGCC CG TCAC TCTCCCC ---AAGCCAACAAT  
 Amoc GAAACA-TGGCAA TAAAGCACGC ACATAT CGCC CG TCAC TCTCCCC G-----AGCTAA  
 Hame GAA-TC-TGGCCC TGAAGCGCGC ACACAC CGCC CG TCAC TCTCCCC GAGCTA---ATA-  
 Chso GAAATC--GGCCC TGAAGCGTGT ACACAC CGCC CG TCAC TCTCCCC GAGCAG--AAAAAC  
 Lyto GAAATT--GGCCC TGAAGCGCGC ACACAC CGCC CG TCAC TCTCCCC AA--G---CCCA--  
 Encr GAAATT--GGCCC TGAAGCGCGC ACACAC CGCC CG TCAC TCTCCCC AA-----GCCTAC

Bvar GAAATT--GGCTC**TGAAGCGCGC**ACA**TACCGCCCG**TCAC**TCTCCCC**GAACCT-CTCGA--  
 Noco GAA-AT-TGGCTC**TGAAGCGCGC**ACA**TACCGCCCG**TCAC**TCTCCCC**G-----AAAAAT  
 Chsp GAAATA--GGCCA**TAAAGCATGC**ACA**CACCGCCCG**TCAC**TCTCTCT**AAATGCATTGAA--  
 Arja GAAACT--GGCCC**TGAAGCGCGC**ACA**CACCGCCCG**TCAC**TCTCCCC**AA-----GAACA  
 Pase GAAAGA--GGCTC**TGAAGCGCGT**ACA**TACCGCCCG**TCAC**TCTCCCC**G-----AAAATGA  
 Trel GAAGCT--GGCCC**TGAAGCACGT**ACA**CACCGCCCG**TCAC**CCTCCCC**---A-GAATGTT-C  
 Lifa GAA-GA-CGGCAA**TGAAGCGCGT**ACA**GACCGCCCG**TCAT**TCTCCCC**GAATCT--ATATTC  
 Acur GAAGAC--GGCAA**TGAAGCGCGC**ACA**CACCGCCCG**TCAT**TCCCACC**T--TTAAAGTAGAA  
 Ampe GAAACT--GGCCC**TGAAGCGCGC**ACA**CACCGCCCG**TCAC**TCTCCCC**AAACCCA-GAAC--  
 Urja GAACTT--GGCCC**TGAAGCGCGC**ACA**CACCGCCCG**TCAC**CCTCCCC**AAAA---CGAATTA  
 Enet GAAGTT--GGCCC**TAAAGCGCGC**ACA**CACCGCCCG**TCAT**TCTCCCC**AAGCTTATTAACCC  
 Ptbr GAAGCT--GGCCC**TTAAGCGCGC**ACA**CACCGCCCG**TCAC**TCTCCTC**TAACCAAACACAAT  
 Safa GAAAT--TGGCCC**TTAAGCGCGC**ACA**CACCGCCCG**TCAC**TCTCCCC**G-----AGCTAA  
 Icae GAAATC--GGCTC**TGAAGTGCCT**ACA**CACCGCCCG**TCAC**TCTCCCC**AAGCTCACCAAC--  
 Asmi GAAACC--GGCTC**TAAAGCGCGC**ACA**CACCGCCCG**TCAC**TCTCCCC**AAAAAAAAATTA--  
 Foal GAA-GT-CGGCCA**TAAAGCGCGT**ACA**CACCGCCCG**TCAC**TCTCTCC**AAATAATAGC-ATT  
 Drze GAAACC--GGCCC**TGAAGCGCGC**ACA**TACCGCCCG**TCAC**TCTCCAC**AGTA---AAAAATT  
 Rhas GAA-AC-TGGCCC**TGAAGCGCGC**ACA**CACCGCCCG**TCAC**TCTCCCC**A--AAC-CCACTGA  
 Elac GAAACT--GGCCC**TGAAGCGCGC**ACA**CACCGCCCG**TCAC**TCTCCCC**GAGCTTAAATTT--  
 Kugu GAAACT--GGCTC**TAAAGCACGC**ACA**CACCGCCCG**TCAC**TCTCCCC**G--AAACACCAATT  
 Plor GAAATA--GGCCC**TTAAGCGCGC**ACA**CACCGCCCG**TCAC**TCTCCCC**AAGCTTACACAA--  
 Sgun GAAACC--GGCCC**TGAAGCGCGC**ACA**CACCGCCCG**TCAC**TCTCCCC**G--AG---CTTAAT  
 Zaco GAAATT--GGCCC**TGAAGCGCGC**ACA**CACCGCCCG**TCAC**TCTCCCC**A--AG---CTCACA  
 Zbfl GAAAC--CGGCCC**TGAAGCGCGC**ACA**CACCGCCCG**TCAC**TCTCCCC**G-----AGCTTA  
 Spba GAAATT--GGCTC**TAAAGCGCGT**ACA**TACCGCCCG**TCAC**CCTCTCT**AG-----GCCTAT  
 Game GAAACC--GGCTC**TGAAGTGCCT**ACA**CACCGCCCG**TCAC**TCTCCCC**AA-----GCTCA  
 Thth GAA-AT-CGGCTC**TGAAGTGCCT**ACA**CACCGCCCG**TCAC**TCTCCCC**A-AGTTACCAATT  
 Xigl GAAACT--GGCCC**TAAAGCGCGC**ACA**CACCGCCCG**TCAC**CCTCCCC**GAGCCC--TAA---  
 Hyja GAAGCC--GGCTC**TGAAGTGCCT**ACA**TACCGCCCG**TCAC**TCTCCCC**AAGC-TCACAAG--  
 Psan ----CC--GGCTC**TGAAGAGCGC**ACA**TACCGCCCG**TCAC**TCTCCCC**A-----AAAAT-A  
 Cupa GAA-AT-CGGCTC**TGAAGTGCCT**ACA**CACCGCCCG**TCAC**TCTCCCC**A--AGC-TCATCAA  
 Mpch GAAACC--GGCCC**TAAAGCGCGC**ACA**CACCGCCCG**TCAC**TCTCCCC**A--AGCTATAAACT  
 Char GAAACC--GGCCC**TAAAGCGCGC**ACA**CACCGCCCG**TCAC**CCTCCCC**CA---GCTTAA--  
 Pser GAAACC-TGGCTC**TAAAGCGCGC**ACA**CACCGCCCG**TCAC**CCTCCCC**GAGCTA---ATAT  
 Prol GAAATT--GGCCC**TAAAGCGCGC**ACA**CACCGCCCG**TCAC**CCTCCCC**AA-----GCCCT  
 Plbi GAAACT--GGCCC**TAAAGCGCGC**ACA**CACCGCCCG**TCAC**CCTCCCC**GAGCCCCCTGAA--  
 Calu GAA-AC-CGGCAC**TGAAGCACGT**ACA**CACCGCCCG**TCAC**CCTCACC**A--AGC-GC-CTGG  
 Papa GAAACC--GGCCC**CTAAGCACGT**ACA**CACCGCCCG**TCAA**TCTCCCT**G--AAAACATTGAA  
 Sufr GAAACC--GGCTC**TGAAGCGCGC**ACA**CACCGCCCG**TCAC**TCTCCCC**AAGCTCCAATCAAC  
 Stci GAAATT--GGCCC**TGAAGCGCGC**ACA**CACCGCCCG**TCAC**CCTCCCC**T-----AGCTCTT  
 Taru GAAACC--GGCTA**TGAAGCGCGC**ACA**CACCGCCCG**TCAC**TCTCCCC**AAACTCT--TAA--  
 Rala GAAATT--GGCCC**TGAAGCGCGC**ACA**CACCGCCCG**TCAC**TCTCCCC**G-----AGCTA-C

\* \* \* \* \*

|      | HVR                                                | 42'                  |
|------|----------------------------------------------------|----------------------|
| Scca | -----TATT-----T-TTATAAAAATTTTACCAA-----AA-CA-A     | <b>GAGGAGC</b> CAAGT |
| Muma | CTTATTTTTTTTATA-AATACATTT-----CTTT-----AACAA--A    | <b>GAGGAGC</b> CAAGT |
| Erca | TTA-ACAAAATTTA-TAAAAAACTATATATAG-----A----AA       | <b>GAGGAGC</b> CAAGT |
| Pose | -----CACACTTT-TAATAA-AACACTACTAA-----CA-AGAA       | <b>GAGGAGC</b> CAAGT |
| Actr | -----CCCCAAGTA-TATAAATCTACAACCCAA-----ACA--A       | <b>GAGGAGC</b> CAAGT |
| Scal | -----CCTA---A--GTACATAAATCTATAACC-----CAAACAA      | <b>GAGGAGC</b> CAAGT |
| Posp | TACC-----CCCAG-TATATAAAAATATAA-CC-----CAAGCAA      | <b>GAGGAGC</b> CAAGT |
| Atsp | CC---A-TTTAACTTAATAAGCAACAAACCAA-----AACAA-A       | <b>GAGGAGC</b> CAAGT |
| Leoc | TTAACT-TA-----ATAAACAGAAAGCCAGAA-----CAA           | <b>GAGGAGC</b> CAAGT |
| Amca | ACCCTA-TA-----ATAAAAAAACACCCTTA-----ACAA--         | <b>GAGGAGC</b> CAAGT |
| Osbi | CACTGACATTC AACAAAATAACTAATATAAATATGTC--ACCAAC-ACA | <b>GCGGAGA</b> CAAGT |
| Pabu | AG-----CTATCACCAGCTAAACTTCATAATTAACCAAAAATACCTA    | <b>GAGGAGA</b> CAAGT |
| Hial | A-----ATTTAA-----ATAAACATTACAACC-----GA-ACAA       | <b>GAGGAGA</b> CAAGT |
| Elha | -----AACAAAGGT-ACATAAACAACTAG--AA-----AAAACAA      | <b>GAGGAGC</b> CAAGT |
| Mlcy | -AC-CCCACATATA-CAAAAACAACAACCAAC-----AC---AA       | <b>GAGGAGC</b> CAAGT |
| Algl | A-----TGAATAT---ATAAGCTTAAAGGTAG-----CT-ATAA       | <b>GAGGAGC</b> TAAGT |
| Ptgi | -----TAAAGATAC-TTAAGAAACAAGAAGACA-----T---AA       | <b>GAGGAGC</b> CAAGT |
| Alaf | AAAATATTT-----ATAAAA-CTGCAGACTA-----CCTA--         | <b>GAGGAGA</b> CAAGT |
| Nock | CA---ACAAAATA-TATAATAAGCCTGCAGAC-----TAC-CTA       | <b>GAGGAGA</b> CAAGT |
| Anja | AATAAA---ATAAT-C-CATAAAACAATAA-GA-----ACAAAA       | <b>GAGGAGC</b> CAAGT |
| Gyki | CGAAATGCC-----ATATATAAAATTTTAGAC-----CAATAGA       | <b>GAGGAGC</b> CAAGT |
| Syka | A-----AACATCTATAAACACCA--AAAC-----ACAAGAAA         | <b>GAGGAGA</b> CAAGT |
| Opma | CAAACAAAAAATTT-A-TAAAC--CTCAACTA-----GC-AAAA       | <b>AAGGAGC</b> CAAGT |
| Comy | GAATTACTT-----TTATAAACACTTAATTTG-----GCCTACA       | <b>GAGGGGC</b> CAAGT |
| Sasp | TAG-TATTAACATG-TATAGT--GCATAG-----A                | <b>GAGGAGC</b> CAAGT |
| Eupe | -----ATTATTTATAATTACTTGACATGA---TATTC---A          | <b>GAAGAGC</b> CAAGT |
| Enja | -----TCACGAGT-AATTTAACCTACACATG-----TA-AAAA        | <b>GGGGAGC</b> CAAGT |
| Same | -----CACCAAAGT-AAGTAACGCAATATTTGT-----CAC--AA      | <b>GGGGAGC</b> CAAGT |
| Chch | CAGAAAATT--GTA-AACAGCCAGCAACCCTAG-----CCCCAA       | <b>GGGGAGC</b> CAAGT |
| Grgr | AT-----TGGACTCTAACCCCATCCCGGGTCCG--CTTTTGTATA      | <b>GGAGAGC</b> CAAGT |
| Caau | ACCAGAAATATCTA-ATATAATAG---CA--C-----TGAC-AA       | <b>GGGGAGC</b> CAAGT |
| Cyca | -----CCAA---AA-ATACATAATACAACAGCA-----CTGACAA      | <b>GGGGAGC</b> CAAGT |
| Dare | CA-----CAAGAAATAATTAATACAGAAG-----CACAGACAA        | <b>GGGGGGA</b> AAAGT |
| Cost | CAATAGTTA-----A-TAACATACAAGCACAA-----ACAA          | <b>GGGGAGC</b> CAAGT |
| Leec | -----CAACAAATG-TTTTTAACACCAAAGCGC-----CG-ACAA      | <b>GGGGAGC</b> CAAGT |
| CrIa | CA--ATCAATGTA-AATAACAA-CAAAGCACC-----AAC--AA       | <b>GGGGAGC</b> CAAGT |
| Clmc | AACCAAGTA-----ATAACAACAACCAATG-----AAAG-C          | <b>GGGGAGC</b> CAAGT |
| Phin | ACAACAGTA-----ACTAACAAAATATTCCCC-----TAAGC         | <b>GGGGAGC</b> CAAGT |
| Icpu | TT--ACCCAACATTCCTAATACAT-TACACAT-----CAACA-C       | <b>GGGGAGC</b> CAAGT |
| Psto | AC--TACCCAATATAT-AATAAA-ACACATAAT-----TA--CAC      | <b>GGGGAGC</b> CAAGT |
| Cora | T-----AACAAATAGATAATACATC--AAAA-----AACACATC       | <b>GGGGAGC</b> CAAGT |
| Eisp | -----ACAAAGCT-ATATAACACAACCTCTTA-----TA-CTAA       | <b>GGGGAGC</b> CAAGT |
| Apal | C----AACTTAGT-ATTTAACACATTAACATG-----AA-TTC-       | <b>GGGGGGC</b> CAAGT |
| EsLu | T-----TATTAAT-AAAAAATATATCGA-ACA-----AA-----       | <b>GGAGAGC</b> CAAGT |
| Dape | TTAACACCCTTTTA-AATAAAAA--ATTAACAG-----AA-CAAA      | <b>GGAGAGC</b> CAAGT |
| Glse | CAACATAT--AAAT-AAGAAAATA---CACGA-----ATC-AA        | <b>GGGGAGC</b> CAAGT |
| Naar | AAAATTAACT-----AAGAAAACAACCTGACTA-----A-           | <b>GGGGAGC</b> CAAGT |
| Baoc | -----TCCCAAGT-AACTAAGAAAACAACCTGG-----A-CTAA       | <b>GGGGAGC</b> CAAGT |
| Opso | TCTTTCTCTAAATA-ACTAAGAAAACA---ACT-----AGACTAA      | <b>GGGGAGC</b> CAAGT |
| Alte | AC--CTTTAAAAGTA--ATAAC-AAAATTAAC-----TCACCAA       | <b>GGGGAGC</b> CAAGT |
| Plap | -----CCAAAAGT-AAATAA-CAAAATTGACT-----CA-CCAA       | <b>GGGGAGC</b> CAAGT |

Plal CAC-TTTCTTTGGT-TCTTAACAAGATTTCCGA-----ACA--AA**GGGGAGG**CAAGT  
 Sami CA-----GTGCAGTTCTTAACAAGACAAC-----CGAA-CAA**GGGGAGG**CAAGT  
 Rere -----CTAGTAA----CTAACAAGAAAACCTCG-----AG-TAA**GGGGAGG**CAAGT  
 Gama -----TTGGTTCATAAAAGCACT-ACTGG-----A---CAA**GGGGAGG**CAAGT  
 Onmy TGTCTTTCTA-----ACTAAGAAGTTAAC--CG-----AACAA-A**GGGGAGG**CAAGT  
 Sasa C-CCTTCTA-----ACTAAGAAATTAACCGAA-----CAA**GGGGAGG**CAAGT  
 Cola AAT-CTACCCTTCT-AACTAAGAAGTTAACCGA-----ACA--AA**GGGGAGG**CAAGT  
 Dita CAACAGT---AATT-AAAAAGTTT-----CTTG-----AACT-AA**GGGGAGG**CAAGT  
 Gogr -----CCCCCCC-TTCTTAACACAAACCACA-----AC-CTAA**GGGGGGA**GAAGT  
 Chsl CGCGACTCTTGTAT-ATACTAGAC---AGCAA-----GACA-AA**GCAGAGG**CAAGT  
 Atja T----ATAACAATTAATAAAAAATTACTAGAC-----CC-AA--**GGGGAGG**CAAGT  
 lido -----TATTTAA----ATAAAAAACTACCAGA-----C--CAA**GGGGAGG**CAAGT  
 Auja CTACCT---ACATT-T-CATAAA-CAAAC-TT-----AAAACAA**GGGGAGG**CAAGT  
 Chag -----TCTAAATAC-ATAAAACCCCGTTCCCC-----G---CA**GGGGAGG**CAAGT  
 Hami -CTAACTTT-----ACCTAAAAACTTTTATCC-----TCA--A**GGGGAGG**CAAGT  
 Saun -----ACCCTAC----CTAAAAAATTTTAATC-----TTAA**GGGGAGG**CAAGT  
 Nema TC-----TTATATAATTAATCCGAATATAT-----AGGGCAA**GGGGAGG**CAAGT  
 Disp CC---C-TCCGATAACATATTATGTCAACTGG-----GTAA-A**GAGGAGG**CAAGT  
 Myaf TTAACCCCTA-----ACCTATAACGTAACACCT-----GGCAAAA**GGGGAGG**CAAGT  
 Lagu -----GAAGAACT-CCCTAAAAGGTAACGCAC-----GG-CCA**GGGGAGG**CAAGT  
 Trtr AA-----A-ACATCTTTAAACCCCAAC-T-----AAAACAA**GAGGAGA**TAAGT  
 Zucr T-----AACTATAT--TTTAATACCCATAATT-----AA-CTAA**GAGGAGA**TAAGT  
 Pxja TA--AAACATATTA-ATTAATAAATTAGCCAA-----ACC--AA**GGGGAGG**CAAGT  
 Pxlo -----AACATATT-AA-CTAAAAAATTAGCCA-----AA-CAA**GGGGAGG**CAAGT  
 Pctr -----AAAAAG--T-AAATAAACACAAAACCTGA-----CC-CA-A**GAGGAGG**CAAGT  
 Apsa C-----TAAACTAAATAAAACA---ATAAA-----ATTAACAA**GGGGAGG**CAAGT  
 Cabe TA-----ATTACTACGTCAGAAATA-ACA-----GCCATATAA**GGGGAGG**CAAGT  
 Bzze -----ACTACGTTAACTAAAACATCATATG--TACAA---A**GGGGAGG**CAAGT  
 Siim AACGTACCT-----ACAAG--CTAACATGT-----AGCA--**GGGGAGA**CAAGT  
 Ctru CAA-ATTTTATATT-TAAAAACATACAAACG-C-----A---GA**GGGGAGG**CAAGT  
 Dpbr CACGAATTAATA---CTTAAAAATAAACAA-----T-GCAA**GGGGAGG**CAAGT  
 Caki CAATTCTCTT-----ATTCTTAATAATTTAAAT-----AAAACAA**GGTGAGA**TAAGT  
 Phja GT-----AAG-ATTTAAATAAAACATTTT-----TTAACCGCA**GGAGAGG**CAAGT  
 Brsp AAAAAA-CC-----ATAAGGTT-----AGGG-----TACCC**GGAGAGG**AAAGT  
 Gamo CTAGATATTA----CCTAAAATGCTTTT--TA-----TAATA-A**GGGGAGG**CAAGT  
 Lolo CTAAATA-T---TA-CCTAAAATGTTTTATATA-----ATAA**GGGGAGG**CAAGT  
 Batr --ATCA--CTCAT-TACGTAAA---TGA-GT-----TCTCTAA**GAGGGGG**AAAGT  
 Prmy CT---CCAAATTA-AGTAAACGCTATTTAA-----GAC--AA**GGGGAGG**TAAGT  
 Loli -AATACTGAAAAA---TTAATAATAAGACACAA-----CTGCAA**GGGGAGG**CAAGT  
 Loam -----CTACATATAATTAATCATAATAACT--GCAA-----**GGGGAGG**CAGGT  
 Chab CAGGTCTTTATAC----TCTAAAACCTTATGGA-----CAGCAA**GGGGAGG**CAAGT  
 Chto CAGGTCTTTATAC---TCTAAAACCTTAT-GGA-----CAGCAA**GGGGAGG**CAAGT  
 Majo CT---ATGCTA-GTACTTAACAATA-AGGACAT-----CACCA-A**GGGGAGG**CAAGT  
 Hlst GA--TAGAT----ACCTTAACAAATGTCTTA-----AGGCAAT**GGGGAGG**CAAGT  
 Clpe -----CTCTCACT-AACTAAAACCTATA-AA-----AG-AAG**GGGGAGG**CAAGT  
 Mlmr ATAG--ACTAAATA-ATTAACCACCATTAAAA-----GC-TAA**GGGGAGG**CAAGT  
 Crcr T-----TTTCATTTCATAATCCCCT--TAA-----TCAAATC**GGGGAGA**AAAGT  
 Muce -----CTTTTTATCCATAATTCCCTTAAATC--AAATTC---**GGGGAGA**AAAGT  
 Bege CAACACCTAATAA---G-TAAGACCCTAT-CTT-----AGGCAA**GGGGAGG**CAAGT  
 Mela C-----TGCAATAAATAAAAGCT--ACTC-----AAAAGAA-**GGGGAGG**CAAGT  
 Hats TTTAACCCTTAAA-----TAAAAACGAACCAG-----G-CAAG**GGGGAGG**CAAGT  
 Orla -----TTAA---AC-ATAAATAAACCTTCAAG-----GAATAA**GGGGAGG**CAAGT

Cosa CTTAAAT---AATT-AATCAATT-----AAATT-----AATA-AAGGGGAGGCAAGT  
Exsp TA---AAAAGATTA-AGTAAAACCATAGATC-----CAATAAAAGGGAGGCAAGT  
Depa AA-AGA-----AAA-TAATAATACATTAA-CA-----AAATAAAAGGGAGGCAAGT  
Rima A-----ACCCTAC-----ATAAAAAGCCTTACCA-----GC-A-AAAGGAGAGA CAAGT  
Fuol AATATA-----AGA-TTTTTAATGAACTAAATA-----AAGCAAAAGGGAGGCAAGT  
Gmaf ATA-CATTAA--TA-ACTAATACCTCACC-AGA-----ACA--AAAGGGAGGCAAGT  
Xeei AATCTTC-ATCCTT-AATAAACTA----AATAG-----GCA-AAAGGGAGGCAAGT  
Pros C-----TAA-TTAACTAATACCCC--GCCA-----ATTGCAAAAGGGAGGCAAGT  
Scmi -----TCTCAAAT-ATTTAAACCCCCCCCCG-----CT-TAAAGGAGAGA CAAGT  
Rolo AC--CGCACCAAATA--ATTAATTATTTTATTT-----CCGCAAAAGGGAGGCAAGT  
Cere -----TAAACGATAATTAATTAGTTATAACC--CTTTA---AGGGAGGCAAGT  
Daga -----CAAATCAA-TAATAATAAATTAATTA-----ACATTAAAGGGAGGCAAGT  
Anco -----ACCTAATAACTAA---AACCTTAAT--AC-AAA-AAAAGGGAGGCAAGT  
Dmve AC---T-ACTAATTAACTAAAACCCCAATGCAG-----GACAC-AAGGAGAGGCAAGT  
Dmar AC---CATCTATTA-ATTAATACCCCGTACAG-----CATTACAAGGAGAGGCAAGT  
Anka AACAAGT---AACT-AAATACCC-----ACCAC-----AATA-AAAGGGAGGCAAGT  
Moja TTT-CATCAA-ATA-ACTAA-ACCCTTAATACA-----ATA--AAAGGGAGGCAAGT  
Hoja -----ACCAATAAATAA---ACCTTTAAC--AC-AAT-AAAAGGGAGGCAAGT  
Bede AT-----TCTTTATAACTAAAATATTATTC-----ATTGCAAAAGGGAGGCAAGT  
Besp TT---ATTCTTTATAACTAAAACAGTACCCATT-----GCAA--AGGGAGGCAAGT  
Mysp CCCA--TTAAACTA-ACATAAC-AACTACTCA-----TC-CAAAAGGGAGGCAAGT  
Osja -----CTAAATTA-CCTATACA-ACTACCTAT-----ACA--AAAGGGAGGCAAGT  
Sgro AC--TACTAAACTAAACCTTAAAACATTACCCA-----TGA-AAAAGGGAGGCAAGT  
Pzpa CT---TTAATGCTTTTATAAAAACCTTA-TGTAA-----AACAA--AGGGAGGCAAGT  
Zeja CC---CTTAACATTTTATAAAAACCTTTTACTAA-----ATGAA--AGGGAGGCAAGT  
Zzne CC---CCT-AACTA-TCTATAAAACAATTATTA-----AAA-AGAAGGGAGGCAAGT  
Zefa -----AACCTTTC-A---TAAACCTTTATTA-----AA-CAAAAGGGAGGCAAGT  
Acni --TGCCCTAAACA-TTTCATAAAACTTTTATT-----AAATAAAAGGGAGGCAAGT  
Ncrh AA-----C-ATTTCAATAAAACCTTTTAT-T-----AAATA-AAAGGGAGGCAAGT  
Agca C-----AAGTAA-----CTAAAACCTA-AATT-----CC-TAAAAGGGAGGCAAGT  
Hydy -----CATAGTT-AACTAAAGCCTAGTATC-----TG-CAAAAGGGAGGCAAGT  
Gsac -----CACAAATTAC-TTAAAAACTAATAATTGC-----A---AAAGGGAGGCAAGT  
Pevo -TAACA-AT-----CCATAAACAATAATAAGA-----CAAAAAGGGAGGCAAGT  
Hiku ATCACAATTA-----ATTAAAACCCCTAAA--TA-----AATACAAAGGGAGGCAAGT  
Inpa ATAACAT--ACCT-AATA-CATT---ACTCC-----ACCA-AAAGGGAGGCAAGT  
Auch GGTAACATCATT---ATTCCAAAAGGTTTCATGA-----TA-ACGAAGGGAGGCAAGT  
Fico -----TAATTT---CTAATAAGATAAAGAG-----CC-A-GAAGGGAGGCAAGT  
Macs -----TTTGA---T-AACTAATACCTTA--AGA-----TCTCTAAAGGGAGGCAAGT  
Moal C-----CCTAA-----CTAAAACACTATCAGC-----CA-AAGAAGGGAGGCAAGT  
Syma -----CTTA---TA-TAATAATAAACTACCAAC-----CTCAAGAAGGGGGGCAAGT  
Maf r -----TACCCCT-AACTAAACACAAAACAAT-----CA-CAAAAGGGAGGCAAGT  
Dcpe AA-----C-ATAATTAATATGCAATTAT-G-----CCTAT-AAAGGGAGGTAAGT  
Dct i TTAACA-TA-----ATTAATACCCAATCAGCC-----TATGAAGGGAGGCAAGT  
Hehi CAC-TTTTAATAAT-TAAAAACCCAAAAATCGC-----G---GAAGGGAGGCAAGT  
Stam AA-----TCAATTAATTAACCCCTAG-----AATTGCAAAAGGGAGGCAAGT  
Hogi -----GTAAAACAC-ATAAATAAAACCCTATTA-----ATATAAAAGGGAGGCAAGT  
Erzo TA---ATTCAATTA-ACTAAACC-CTAAAAGG-----GCA--AAAGGGAGGCAAGT  
Hxot CC---ACTCAGTTA-ATTAAAACCTAATAATCA-----TA---GAAGGGAGGCAAGT  
Core AATCAGTTA-----ACTAAAACCTAATAATCA-----AAAAAGGGAGGCAAGT  
Apve -----CAATTAA-----TTAAAACCTAATAACC-----A--ACAAAGGGAGGCAAGT  
Lat j GG---CATAACATAA-ATAAAACCAAACGA-AC-----GCGAA--GGAGAGGAAAGT  
Laja CTATTA-TA-----ACTAATACCCCTATTAATA-----TGAA--AGGGAGGCAAGT



Syja AACCTAAAT-----ACCTAAACACCTATAATA-----CTCCTA-**GGGGAGC**CAAGT  
 Epme TTAAATTTAACTT-AAAACCTTTC-----CACT-----AACACAA**GGGGAGC**CAAGT  
 Grse AC-----TAACAATAACTAATAC-CCATAA-----ACAGCTAA**GGGGAGC**CAAGT  
 Clja TATCAACTATAATT-AATACACTA----TCTTG-----TGCT-AA**GGGGGGA**TAAGT  
 Ogcy ATAACATAAT-----ACTAATGCCTTATG--AA-----AAAAATA**GGGGAGC**CAAGT  
 Plna TTAACATA-----ACTAATAAGTGTATTTGA-----TAA**GGGGAGC**CAAGT  
 Lema -GAACCTTTA-----ATAAATAAAATCCCGCCA-----CTGCAAA**GGGGAGC**CAAGT  
 Etzo TGA-CTAAAG--TA-ACTAAAACCTTAAA-ATC-----GCG--AA**GGGGAGC**CAAGT  
 Apse TACCTAGTA-----ACTAAACACTTAAACCCTA-----CAAA--**GGGGAGC**CAAGT  
 Epde T-----AATTAA-----CTAAAAACCTACTATC-----G-CGAA**GGGGAGC**CAAGT  
 Slja -----TGAAACCTT-AACTAAAAAGAGAACAGC-----TA-AAGA**GGGGAGC**AAAGT  
 Bsja -----AACCCTATAACTAATAACCCATGAC---TGCAA---A**GGGGAGC**CAAGT  
 Ecna CC--AACACCCCTTAA--CTAAACTATACCGAC-----CGCTACA**GGAGAGC**AAAGT  
 Cohi -----TTATTTTTT-CTAATCACTTATAAAGC-----T---AA**GGAGAGC**AAAGT  
 Caar GG--ACCTAAATTTTCTTAAACCTAAACAACC-----GCGAA--**GGAGAGC**AAAGT  
 Came CCTAAAATTTCTTT-AAACCCTAA---CAA-C-----CGCG-AA**GGAGAGC**AAAGT  
 Mema -----CA-AACCAT-AAATAATAAACTAT--AA-----CCGCAA**GGGGAGC**AAAGT  
 Lenu A-----CAACTTAACTAAAATACA--AGAC-----ATAACAA-**GGGGAGC**CAAGT  
 Plma CCCTAAT--AACT-AAAATACTA----AAAC-----CACG-AA**GGGGAGC**CAAGT  
 Emst CAGATAACT-----A---AAGCCCTATAATTG-----CAAA**GGGGAGC**CAAGT  
 Ptti ACTCAAATA-----CTTAAAACCTTAAAATTG-----CAAA--**GGGGAGC**CAAGT  
 Losu ACCCCATCTTATTA-TCTAAAAGCTAATAAT-----GCT--GA**GGAGAGA**CAAGT  
 Geoy TAATCTTTTTAAAT-AAAATCCCG---CCTTT-----GCA-AA**GGGGAGC**CAAGT  
 Dipi AC-----CCAATAACTAAAACCAGCAC-T-----AGCAATTA**GGGGAGC**CAAGT  
 Pama TTACCAAAACATTA-ATTAATAAT--GCCAAAAT-----CA-TAGA**GGGGAGC**CAAGT  
 Leob AAA-TTTTGCCCTA-AATAAACACTTCCCACC-----GCT--AA**GGGGAGC**CAAGT  
 Neba AA-----TAACCTAAATAAAACGTA-AAAAA-----AG--CATA**GGGGAGC**CAAGT  
 Pdpi -----CTTAATTTA-CATAAACCTACGTCTAAA-----CCCTACA**GGAGAGC**AAAGT  
 Nimi -----ATTCAATT-AAATAA-AACCCCATAT-----AG-TAA**GGAGAGC**CAAGT  
 Uptr TTCTCGT---ACTT-AACAATACG---GACAC-----CACT-AA**GGGGAGC**CAAGT  
 Pesc TAT-TACTCACGTA-ATTAATCCCACACCGCTG-----CCC--CA**GGGGAGC**CAAGT  
 Baar CT---AATTTAATAACTAATTCAACTACCACC-----ACGAACA**GGGGAGC**CAAGT  
 Moar -----TTTGAAT--AACTAAAACCTCATAAT-----TGCAA**GGGGAGC**CAAGT  
 Toja CAA-ACTCAACATA-ACTAA-ACCCCTATAACT-----GCA--TA**GGGGAGC**AAAGT  
 Chau -----TTTAACAT-AACTAA-TATGCTATAAC-----TG-TAGA**GGGGAGC**CAAGT  
 Chse AG--ATTTTAAATTA--ACTAAA-ACACTACAA-----CTGTAA**GGGGAGC**CAAGT  
 Enar AAAAAT---TTTGT-AAC-TAAGACCCTAC-AA-----CTGCAA**GGGGAGC**CAAGT  
 Hpty -----CTTAAATAA-CTAAAACC--CTACTACC-----ACA--AA**GGGGAGC**CAAGT  
 Nana ---ATTAATCAACT-TAATAAACCTAAG-AC-----ACATAGA**GGGGAGC**CAAGT  
 Mcst -----TCTCATATA-ACTAAGACCCTAAAGTCA-----C---AGA**GGGGAGC**CAAGT  
 Rhox -----TCATTTAAC-TAAAACCCTAAGACTGCT-----AA-----**GGGGAGC**CAAGT  
 Opfa GT-----TAC-CTGTAACTAAAACCTCAA--G--ATATTGTA**GGGGAGC**CAAGT  
 Paar AAAACA-TA-----ATTAATTTGCTAGACTTG-----CACAA**GGGGAGC**CAAGT  
 Gozo -----TCAAATAACTAAACCCT--ATAAG-----AC-ACAA**GGGGAGC**CAAGT  
 Ackr AATAAAATTCAATA-AATAATAACAATACCAG-----CTAA**GGGGAGC**CAAGT  
 Elev TA-----ACATATATACCTAAAACGTAAA-----ATTAACAA**GGGGAGC**CAAGT  
 Trdu -----CACCCTATAAATAATATATT-TTACC--GGTAA---A**GGGGAGC**CAAGT  
 Amoc TACGAA---TATAA-TACCTAAAAAATTAC-AT-----CTGCAA**GGGGAGC**CAAGT  
 Hame AAAGCACATA-----ATTAATAAACCGA--CC-----TGCAA-A**GGGGAGC**CAAGT  
 Chso TCTTTACC-TAAAAA-GCCATAAAAATGTAAA-----**GGGGAGC**CAAGT  
 Lyto -----CCAACCTAA-TTAACTAAACCCTAATAA-----TCGCAA**GGGGAGC**CAAGT  
 Encr -C--AACTTAATTA---TTAAACCATAATAAT-----CGC-AAA**GGGGAGC**CAAGT

Bvar -----AGTAATTT-ACTTAAAACCTAGAACT-----GGCCTTAGGGGAGCCAAGT  
 Noco TTCACC---CTAAT-TATATAAACCTTAG-AG-----CAAAGA GGGGAGCCAAGT  
 Chsp -----CTTTTG-AT-ACCTAACAAACCCT-AAA-----AATTACAGGGAGA GAAGT  
 Arja CCAACTAGT---TA-ATTAAAACCTAATAACAT-----AAAA GGGGAGCCAAGT  
 Pase AAA-TAAAACCTTA-CATAAACATTATCGAAT-----ATA--GA GGGGAGCCAAGT  
 Trel AC-----CTATTGTAACTAAAGAGTAATAAC-----ACCCTCCAGGGGAGCCAAGT  
 Lifa -----TAAAT-----TCCTAATAAGTTACAATC-----GGTAAA- GGGGAGCCAAGT  
 Acur C-----TTAATAACTAAAAAATTAATACG-----AC-ACCA- GGTGGGTAAGT  
 Ampe -----CTTAA-GT-AAATAA-ATCATTATCAC-----CA-AGAA GGGGAGCCAAGT  
 Urja TACAAATTTTAC-T-AAATCAATA---CACAT-----AGTA-AA GGGGAGCCAAGT  
 Enet -----CTTATAA----CTAAGAAACCGAGACT-----AG-TAAA GGGGAGCCAAGT  
 Ptbr T-----AATTTA-----CTAAAACAATAAAAGG-----G-ACCA GAGGAGTAAGT  
 Safa AAAATATCAAT-----TCATAATACCTATTAA-----CAGCAAAGGGGAGCCAAGT  
 Icae -----CAAATAAC-TAAAACACTACAATCGCG-----AA----- GGGGAGCCAAGT  
 Asmi -----AT--GCTCC-CTAATCGA-AATAA-AAG-----ATA--AA GGGGAGCCAAGT  
 Foal --CCACTACT-TAAG-ATGACAAAACCTTTTAT-----TACCC-- GGAGAGCAAGT  
 Drze ACATGAT---AACT-AATAATTACAGAAAAAA-----AACA-AA GAGGAGCAAGT  
 Rhas ATACAAGTA-----AATAACACACAAAAGACA-----TAAA-- GGGGAGCCAAGT  
 Elac -----TAAACATAA-ATAAACACAACAACCTGT-----A---AA GGGGAGCCAAGT  
 Kugu AA-----ACCTTAATTTAAACCACCACAT-----TATC-TAAA GGGGAGCCAAGT  
 Plor -----ACCCAAAT-AACCTAAACCCTACTATT-----G--CAAAGGGGAGCCAAGT  
 Sgun AA-----ACTCAACTAACTAAAACCCTAT-----AATTGCAAAGGGGAGCCAAGT  
 Zaco CCC--TAAAG-----TAAATAAACCCCTATACC-----TGCAAAGGGGAGCCAAGT  
 Zbfl CATATA---CAAG-TAAATAAACCCCTAC-AA-----TTGCAAAGGGGAGCCAAGT  
 Spba AG---A-ACTACATTTATCTAAAACCCCTTCGAC-----TGCAA-AAGGGAGCAAGT  
 Game CTAT--TCAACGTA-ACTAAAACACT-TTAACC-----GC--GAA GGGGAGCCAAGT  
 Thth TATGTATCT-----A---AAACGCTTTAACTG-----CGAA GGGGAGCCAAGT  
 Xigl -----ACTCACTT-AA-CTAAAACCCTATAAT-----TG-CGAA GGGGAGCAAGT  
 Hyja -----TTCCAC-AT-AACTAAAATGCTATTAAT-----ACGCGAA GGGGAGCCAAGT  
 Psan CAA-ATTTAACATA-AATAATATGCTTTATTAC-----ATA--AA GGGGAGCCAAGT  
 Cupa -CCCACCTA-----ACTAAAACAACATAACTG-----CAA--AGGGGAGCCAAGT  
 Mpch T-----CTACATAATTTAAAACATT--AAA-----ACTGCAAAGGGGAGCCAAGT  
 Char -----CTTAAATAA-TAAATAATAACACAAACA-----CTGTAA GGGGAGCCAAGT  
 Pser AAAACAACCTT-----ACTTTAAAACAAGATACC-----TGCGATA GGGGAGCAAGT  
 Prol ACAAGACTAACTA-ACTAAAACCAACAACCCG-----CGAA GGGGAGCAAGT  
 Plbi -----CTA-ATCT-AATTTAAAACCAACAACC-----CG-CGAA GGGGAGCAAGT  
 Calu AAAACCCTA-----ACTAAGATGAGCCTAACT-----GCAA-AGGAGAGCAAGT  
 Papa -----CACCACACTAAATAAAAAATAAGTC--GATACCTGGAAGGGAGA AAAGT  
 Sufr C-----TCATAA-----CTAATTCACCAACTTC-----TG-CTGA GGGGAGCCAAGT  
 Stci AA---AAGTAATTT-CATAAACGCTATA-ACT-----GCA--AA GGGGAGCCAAGT  
 Taru -----TTTAAAAAT-AACTAATAAGCCACCAA-----AG-AAAA GGGGAGCCAAGT  
 Rala CAC-AAACCATTTA-ATTTAAGCCATTAAAAC-----GCA--AA GGGGAGCCAAGT

\* \* \* \*\*

|      | 41' | D'     | 43 |            | 43'  |            |           |       |
|------|-----|--------|----|------------|------|------------|-----------|-------|
| Scca | CG  | TAACAT | GG | TAAGTGTACT | GGAA | AGTGCACCTT | GAAC      | ----- |
| Muma | CG  | TAACAT | GG | TAAGTGTACT | GGAA | AGTGCACCTT | GAAT      | ----- |
| Erca | CG  | TAACAT | GG | TAAGCGTACC | AGAA | GGTGTGCTTC | GAATAAT   | ----  |
| Pose | CG  | TAACAT | GG | TAAGCGTACC | GGAA | GGTGTGCTTC | GAATAT    | ----- |
| Actr | CG  | TAACAT | GG | TAAGTGTACC | GGAA | GGTGCACCTT | GAACAAC   | ----  |
| Scal | CG  | TAACAT | GG | TAAGTGTACC | GGAA | GGTGCACCTT | GAACAAC   | ----  |
| Posp | CG  | TAACAT | GG | TAAGTGTACC | GGAA | GGTGCACCTT | GAACAAC   | ----  |
| Atsp | CG  | NAACAT | GG | TAAGTGTACC | GGAA | GGTGCACCTT | GAATAAC   | ----  |
| Leoc | CG  | TAACAC | GG | TAAGTGTACC | GGAA | GGTGCACCTT | GAATAAC   | ----  |
| Amca | CG  | TAACAT | GG | TAAGTGTACC | GGAA | GGTGCACCTT | GATCAC    | ----  |
| Osbi | CG  | TAACAC | GG | TAAGTGTACC | GGAA | GGTGCACCTT | GATTAAC   | ----  |
| Pabu | CG  | TAACAT | GG | TAAGTGTACC | GGAA | GGTGTACTTC | GAACAAT   | ----  |
| Hial | CG  | TAACAT | GG | TAAGTGTACC | GGAA | GGTGCACCTT | GAATAAG   | ----  |
| Elha | CG  | TAACAT | GG | TAAGTGTACC | GGAA | GGTGCACCTT | GAATAAC   | ----  |
| Mlcy | CG  | TAACAT | GG | TAAGTGTACC | GGAA | GGTGCACCTT | GAACAAT   | ----  |
| Algl | CG  | TAACAA | GG | TAAGTGTACC | GGAA | GGTGCACCTT | GAACAT    | ----  |
| Ptgi | CG  | TAACAT | GG | TAAGTGTACC | GGAA | GGTGCACCTT | GAATAAC   | ----  |
| Alaf | CG  | TAACAT | GG | TAAGTGTACC | GGAA | GGTGCACCTT | GAACAAC   | ----  |
| Nock | CG  | TAACAT | GG | TAAGTGTACC | GGAA | GGTGCACCTT | GAACAAC   | ----  |
| Anja | CG  | TAACAC | GG | TAAGTGTACC | GGAA | GGTGCACCTT | GATAAAT   | ----  |
| Gyki | CG  | TAACAT | GG | TAAGTGTACT | GGAA | GGTGCACCTT | GAATAAT   | ----  |
| Syka | CG  | TAACAT | GG | TAAGTGTACC | GGAA | GGTGCACCTT | GATAAAA   | ----  |
| Opma | CG  | TAACAT | GG | TAAGTGTACC | GGAA | GGTGCACCTT | GAAGAAT   | ----  |
| Comy | CG  | TAACAT | GG | TAAGTGTACC | GGAA | GGTGCACCTT | GATAAA    | ----- |
| Sasp | CG  | TAACAT | GG | TAAGTGTACC | GGAA | GGTGTACTTC | GAAAAATA  | ----  |
| Eupe | CG  | TAACAT | GG | TAAGCGTACC | GGAA | GGTGTGCTTC | GATATAT   | ----  |
| Enja | CG  | TAACAT | GG | TAAGTGTACC | GGAA | GGTGCACCTT | GAATAAC   | ----  |
| Same | CG  | TAACAT | GG | TAAGTGTACC | GGAA | GGTGCACCTT | GAATAAT   | ----  |
| Chch | CG  | TAACAT | GG | TAAGTGTACC | GGAA | GGTGCACCTT | GAGTAAC   | ----  |
| Grgr | CG  | TAACAA | GG | TAAGTGTACC | GGAA | GGTGCACCTT | GACTAAT   | ----  |
| Caau | CG  | TAACAC | GG | TAAGTGTACC | GGAA | GGTGCACCTT | GATCAAACC | --    |
| Cyca | CG  | TAACAC | GG | TAAGTGTACC | GGAA | GGTGCACCTT | GATCAAACC | --    |
| Dare | CG  | TAACAA | GG | TAAGTGTACC | GGAA | GGTGCACCTT | GACATTATC | --    |
| Cost | CG  | TAACAT | GG | TAAGTGTACC | GGAA | GGTGCACCTT | GATCAAAT  | ---   |
| Leec | CG  | TAACAT | GG | TAAGTGTACC | GGAA | GGTGTACTTC | GATCAAATA | --    |
| CrIa | CG  | TAACAT | GG | TAAGTGTACC | GGAA | GGTGCACCTT | GATCAAACC | --    |
| Clmc | CG  | TAACAT | GG | TAAGTGTACC | GGAA | GGTGCACCTT | GAACAT    | ----- |
| Phin | CG  | TAACAT | GG | TAAGTGTACC | GGAA | GGTGCACCTT | GATCAC    | ----- |
| Icpu | CG  | TAACAT | GG | TAAGTGTACC | GGAA | GGTGCACCTT | GAACAAT   | ----  |
| Psto | CG  | TAACAT | GG | TAAGTGTACC | GGAA | GGTGCACCTT | GAACAAT   | ----  |
| Cora | CG  | TAACAT | GG | TAAGTGTACC | GGAA | GGTGCACCTT | GAACAAT   | ----  |
| Eisp | CG  | TAACAT | GG | TAAGTGTACC | GGAA | GGTGCACCTT | GAATAAC   | ----  |
| Apal | CG  | TAACAA | GG | TAAGTGTACC | AGAA | GGTGTACTTC | GAACAAC   | ----  |
| EsLu | CG  | TAACAT | GG | TAAGTGTACC | GGAA | GGTGCACCTT | GTTTAAT   | ----  |
| Dape | CG  | TAACAT | GG | TAAGTGTACC | GGAA | GGTGCACCTT | GTTTAAT   | ----  |
| Glse | CG  | TAACAT | GG | TAAGTGTACC | GGAA | GGTGCACCTT | GAACAAT   | ----  |
| Naar | CG  | TAACAT | GG | TAAGTGTACC | GGAA | GGTGCACCTT | GAACAAC   | ----  |
| Baoc | CG  | TAACAT | GG | TAAGTGTACC | GGAA | GGTGTACTTC | GAACAAC   | ----  |
| Opso | CG  | TAACAT | GG | TAAGTGTACC | GGAA | GGTGCACCTT | GAATAAG   | ----  |
| Alte | CG  | TAACAT | GG | TAAGTGTACC | GGAA | GGTGCACCTT | GAATAAC   | ----  |
| Plap | CG  | TAACAT | GG | TAAGTGTACC | GGAA | GGTGCACCTT | GAATAAC   | ----  |

Plal CGTAACATCGTAAGTGTACC GGAA GGTGCACTTC GGACAAC----  
 Sami CGTAACATCGTAAGTGTACC GGAA GGTGCACTTC GGACAAC----  
 Rere CGTAACATCGTAAGTGTACC GGAA GGTGCACTTC GGACAAT----  
 Gama CGTAACATCGTAAGTGTACC GGAA GGTGCACTTC GAAAAAC----  
 Onmy CGTAACATCGTAAGTGTACC GGAA GGTGCGCTTC GAATAAC----  
 Sasa CGTAACATCGTAAGTGTACC GGAA GGTGCACTTC GAATAAC----  
 Cola CGTAACATCGTAAGTGTACC GGAA GGTGCACTTC GAATAAC----  
 Dita CGTAACATCGTAAGTGTACT GGAA AGTGCCTTC GAATAAC----  
 Gogr CGTAACACCGTAAGTGTACC GGAA GGTGCACTTC GAATAAC----  
 Chsl CGTAACATCGTAAGTGTACT GGAA AGTGTACTTC GGATAA-----  
 Atja CGTAACATCGTAAGTGTACT GGAA AGTGCCTTC GATAAAC----  
 lido CGTAACATCGTAAGTGTACT GGAA AGTGCCTTC GATAAAC----  
 Auja CGTAACATCGTAAGTGTACC GGAA GGTGCACTTC GAACAAAT---  
 Chag CGTAACACCGTAAGTGTACC GGAA GGTGCACTTC GATGAAT----  
 Hami CGTAACATCGTAAGTGTACC GGAA GGTGCACTTC GACAAA-----  
 Saun CGTAACATCGTAAGTGTACC GGAA GGTGCACTTC GAAAAA-----  
 Nema CGTAACATCGTAAGTGTACC GGAA GGTGCACTTC GTTAACA----  
 Disp CGTAACATCGTAAGTGTACC GGAA GGTGCACTTC GAATATA----  
 Myaf CGTAACATCGTAAGTGCACC TGAA GGTGTACTTC GAAAAAT----  
 Lagu CGTAACAAGTAAGTTTACC GGAA GGTGCACTTC GAAAAAC-----  
 Trtr CGTAACATCGTAAGTGTACC GGAA GGTGCACTTC GTGTAAC----  
 Zucr CGTAACATCGTAAGTGTACC GGAA GGTGTACTTC GAATAAT----  
 Pxja CGTAACATCGTAAGCGTACC GGAA GGTGTGCTTC GAAAAAC----  
 Pxlo CGTAACATCGTAAGCGTACC GGAA GGTGTGCTTC GAAAAAC----  
 Pctr CGTAACATCGTAAGCGTACC GGAA GGTGCGCTTC GAAAAAC----  
 Apsa CGTAACATCGTAAGCATACC GGAA GGTGTGCTTC GATTAAC----  
 Cabe CGTAACATCGTAAGTGTACC GGAA GGTGCACTTC GAAAAT-----  
 Bzze CGTAACATCGTAAGTGTACC GGAA GGTGCACTTC GAAAAAC----  
 Siim CGTAACATCGTAAGTGTACC GGAA GGTGTACTTC GACAAACC--  
 Ctru CGTAACATCGTAAGTGTACC GGAA GGTGTGCTTC GAAAAAT----  
 Dpbr CGTAACATCGTAAGTGTACC GGAA GGTGCACTTC GAAAAAC----  
 Caki CGTAACATCGTAAGTGTACC GGAA GGTGTACTTC GACAAAT----  
 Phja CGTAACATCGTAAGTGTACC GGAA GGTGCCCTTC GACAAT-----  
 Brsp CGTAACATCGTAAGTGTACC GGAA GGTGCACTTC AGTAT-----  
 Gamo CGTAACATCGTAAGCGTACC GGAA GGTGCGCTTC GATGAAC----  
 Lolo CGTAACATCGTAAGCGTACC GGAA GGTGCGCTTC GATGAAT----  
 Batr CGTAACAAGTAAGTGTACT GGAA AGTGCCTTC AATA-----  
 Prmy CGTAACAAGTAAGTGTACT AGAA AGTGTACTTC ACAA-----  
 Loli CGTAACATCGTAAGTGTACC GGAA AGTGCCTTC GAGAAA-----  
 Loam AGTAACATCGTAAGTGTACC GGAA AGTGCCTTC GAAAAAC----  
 Chab CGTAACATCGTAAGTGTACC GGAA GGTGCACTTC GAAAAGC----  
 Chto CGTAACATCGTAAGTGTACC GGAA GGTGCACTTC GAAAAGC----  
 Majo CGTAACATAGTAAGTGTACC GGAA GGTGCACTTC GAACAT----  
 Hlst CGTAACATCGTAAGTGTACC GGAA GGTGCACTTC GAAAAAC----  
 Clpe CGTAACATCGTAAGTGTACC GGAA GGTGCACTTC GAAAAGA----  
 Mlmr CGTAACATCGTAAGTGTACC GGAA GGTGTACTTC GTAAAG----  
 Crcr CGTAACATCGTAAGTGTACC GGAA GGTGCACTTC GAAAAAC----  
 Muce CGTAACATCGTAAGTGTACC GGAA GGTGCACTTC GAAAAAC----  
 Bege CGTAACATCGTAAGTGTACC GGAA GGTGCACTTC GATAAAC----  
 Mela CGTAACATCGTAAGTGTACC GGAA GGTGCACTTC GAATATAT---  
 Hats CGTAACATCGTAAGTGTACC GGAA GGTGCACTTC GACAAAT----  
 Orla CGTAACATCGTAAGTGTACC GGAA GGTGCACTTC GTAAAAT----

Cosa CGTAACATCGTAAGTGTACC GGAA GGTGCACTTC GTTAAC-----  
 Exsp CGTAACATCGTAAGTGTACC GGAA GGTGCACTTC GTTAAC-----  
 Depa CGTAACATCGTAAGTGTACC GGAA GGTGCACTTC GTTTAT-----  
 Rima CGTAACATCGTAAGTGTACT GGAA AGTGCACTTC GATAAA-----  
 Fuol CGTAACATCGTAAGTGTACC GGAA GGTGCACTTC GAAAAAT----  
 Gmaf CGTAACATCGTAAGTGTACC GGAA GGTGCGCTTC GAAAAAC----  
 Xeei CGTAACATCGTAAGTGTACC GGAA GGTGCACTTC GAAAAAT----  
 Pros CGTAACATCGTAAGCGTACC GGAA GGTGTGCTTC GATAAAC----  
 Scmi CGTAACATCGTAAGTGTACC GGAA GGTGCACTTC GAAAAAC----  
 Rolo CGTAACATCGTAAGTGTACC GGAA GGTGTACTTC GAAAAAT----  
 Cere CGTAACATCGTAAGTGTACC GGAA GGTGTACTTC GAAAAAT----  
 Daga CGTAACATCGTAAGTGTACC GGAA GGTGTACTTC GAAGAAT----  
 Anco CGTAACATCGTAAGTGTACC GGAA GGTGCACTTC GAAAAAAT---  
 Dmve CGTAACACAGTAAGTGTACC GGAA GGTGCACTTC GAATAAG----  
 Dmar CGTAACACAGTAAGTGTACC GGAA GGTGCACTTC GAGCAAG----  
 Anka CGTAACATCGTAAGTGTACC GGAA GGTGCACTTC GAAAAAT----  
 Moja CGTAACATCGTAAGTGTACC GGAA GGTGCACTTC GAAAAAC----  
 Hoja CGTAACATCGTAAGTGTACC GGAA GGTGCACTTC GAAAAAT----  
 Bede CGTAACATCGTAAGTGTACC GGAA GGTGTACTTC GAAAAAC----  
 Bosp CGTAACATCGTAAGTGTACC GGAA GGTGTACTTC GAA-AAAT---  
 Mysp CGTAACATCGTAAGTGTACC GGAA GGTGCACTTC GAACAAC----  
 Osja CGTAACATCGTAAGTGTACC GGAA GGTGCACTTC GAACAAC----  
 Sgro CGTAACATCGTAAGTGTACC GGAA GGTGCACTTC GAATTACAT--  
 Pzpa CGTAACATCGTAAGCGTACC GGAA GGTGCGCTTC GATCAAC----  
 Zeja CGTAACATCGTAAGCGTACC GGAA GGTGCGCTTC GAT-TAAT---  
 Znne CGTAACATCGTAAGCGTACC GGAA GGTGCGCTTC GATAAAC----  
 Zefa CGTAACATCGTAAGCGTACC GGAA GGTGCGCTTC GATAAAT----  
 Acni CGTAACATCGTAAGCGTACC GGAA GGTGCGCTTC GACAAAC----  
 Ncrh CGTAACATCGTAAGCGTACC GGAA GGTGCGCTTC GACAAAC----  
 Agca CGTAACATCGTAAGTGTACC GGAA GGTGCACTTC GAAAAAT----  
 Hydy CGTAACATAGTAAGTGTACC GGAA GGTGCACTTC GCAAAG-----  
 Gsac CGTAACATAGTAAGTGTACC GGAA GGTGCACTTC GCAAAG-----  
 Pevo CGTAACATCGTAAGTGTACC GGAA GGTGCACTTC GACAAAC----  
 Hiku CGTAACATCGTAAGTGTACC GGAA GGTGTGCTTC GAATAC-----  
 Inpa CGTAACATCGTAAGTGTACC GGAA GGTGCACTTC GAAAAT-----  
 Auch CGAACATCGTAAGTGTACC GGAA GGTGCACTTC GATAACC----  
 Fico CGTAACATCGTAAGTGTACC GGAA GGTGTACTTC GAAAAAC----  
 Macs CGTAACATCGTAAGTGTACC GGAA GGTGCACTTC GAAAAAT----  
 Moal CGTAACATCGTAAGTGTACC GGAA GGTGCACTTC GATAAT-----  
 Syma CGTAACATCGTAAGTGTACC GGAA GGTGCACTTC GGTCAT-----  
 Maf r CGTAACATCGTAAGTGTACC GGAA GGTGTACTTC GAAAAAT----  
 Dcpe CGTAACATCGTAAGTGTACC GGAA GGTGCACTTC GGCAAACACA-  
 Dct i CGTAACATCGTAAGTGTACC GGAA GGTGCACTTC GGTAAACATA-  
 Hehi CGTAACATCGTAAGGGTACC GGAA GGTGCACTTC GTAATAT----  
 Stam CGTAACATCGTAAGTGTACC GGAA GGTGCACTTC GAAAAAT----  
 Hogi CGTAACATCGTAAGTGTACT GGAA AGTGCACTTC GAAAAT-----  
 Erzo CGTAACATCGTAAGTGTACC GGAA GGTGCGCTTC GAAAAAT----  
 Hxot CGTAACATCGTAAGTGTACC GGAA GGTGCACTTC GAAAAAT----  
 Core CGTAACATCGTAAGTGTACC GGAA GGTGCACTTC GTAAAAT----  
 Apve CGTAACATCGTAAGTGTACC GGAA GGTGCACTTC GTACAAT----  
 Lat j CGTAACATCGTAAGCGTACC GGAA GGTGTGCTTC GTTAAAT----  
 Laja CGTAACATCGTAAGTGTACC GGAA GGTGTACTTC GAGAAAT----



Syja CGTAACATCGTAAGTGTACCGGAAAGGTGTACTTCGAATAAA----  
 Epme CGTAACATCGTAAGTGTACCGGAAAGGTGCACCTTCGCAAAAC----  
 Grse CGTAACATCGTAAGTGTACCGGAAAGGTGCACCTTCGAAAAACT---  
 Clja CGTAACATCGTAAGTGTACCGGAAAGGTGCACCTTCGCATAAAC---  
 Ogcy CGTAACATCGTAAGTGTACCGGAAAGGTGCACCTTCGATAAAT----  
 Plna CGTAACATCGTAAGTGTACCGGAAAGGTGCACCTTCGAA-AAAT---  
 Lema CGTAACATCGTAAGTGTACCGGAAAGGTGTACTTCGAAAAAT----  
 Etzo CGTAACATCGTAAGTGTACCGGAAAGGTGCACCTTCGAAAAAT----  
 Apse CGTAACATCGTAAGTGTACCGGAAAGGTGCACCTTCGAAGAAAC---  
 Epde CGTAACATCGTAAGTGTACCGGAAAGGTGCACCTTCGAAAAAT----  
 Slja CGTAACATCGTAAGTGTACCGGAAAGGTGTACTTCGATGAAT----  
 Bsja CGTAACATCGTAAGTGTACCGGAAAGGTGTACTTCGACTAAC----  
 Ecna CGTAACATCGTAAGCGTACCGGAAAGGTGCGCTTCGAATAAC----  
 Cohi CGTAACATCGTAAGCGTACCGGAAAGGTGTGCTTCGATAATC----  
 Caar CGTAACATCGTAAGCGTACCGGAAAGGTGCGCTTCGTAAAC----  
 Came CGTAACATCGTAAGCGTACCGGAAAGGTGCGCTTCG-TTAAAC---  
 Mema CGTAACATCGTAAGTGTACCGGAAAGGTGTACTTCGAAAAAC----  
 Lenu CGTAACATCGTAAGCGTACCGGAAAGGTGCGCTTCGAAAAAC----  
 Plma CGTAACATCGTAAGTGTACCGGAAAGGTGCACCTTCGAAAAAT----  
 Emst CGTAACATCGTAAGTGTACCGGAAAGGTGCGCTTCGAA-AAAT---  
 Ptti CGTAACATCGTAAGTGTACCGGAAAGGTGCACCTTCGAAAAAT----  
 Losu CGTAACATCGTAAGCGTACCGGAAAGGTGCGCTTCGAATAAT----  
 Geoy CGTAACATCGTAAGTGCACCGGAAAGGTGTACTTCGACTAAC----  
 Dipi CGTAACATCGTAAGTGTACCGGAAAGGTGTACTTCGAATATA----  
 Pama CGTAACATCGTAAGTGTACCGGAAAGGTGCACCTTCGACAAC-----  
 Leob CGTAACATCGTAAGTGTACCGGAAAGGTGCACCTTCGAAAAACT---  
 Neba CGTAACATCGTAAGTGTACCGAAGAGGTGTACTTCGAAAAT-----  
 Pdpi CGTAACATCGTAAGCGTACCGGAAAGGTGTGCTTCGAGTAACAAC-  
 Nimi CGTAACATCGTAAGTGTACCGGAAAGGTGCACCTTCGAATAACAAT  
 Uptr CGTAACATAGTAAGTGTACCGGAAAGGTGCACCTTCGAACAT-----  
 Pesc CGTAACATCGTAAGTGTACCGGAAAGGTGCACCTTCGACAAACAT--  
 Baar CGTAACATCGTAAGTGTACCGGAAAGGTGTACTTCGATCAAAT---  
 Moar CGTAACATCGTAAGTGTACCGGAAAGGTGCACCTTCGATAAAT----  
 Toja CGTAACATCGTAAGTGCACCGGAAAGGTGTACTTCGTAGAAT----  
 Chau CGTAACATCGTAAGCGTACCGGAAAGGTGCGCTTCGAAAAACT---  
 Chse CGTAACATCGTAAGCGTACCGGAAAGGTGCTCTTCGAATAAACT--  
 Enar CGTAACATCGTAAGTGTACCGGAAAGGTGCACCTTCGA-AAAAT---  
 Hpty CGTAACATCGTAAGTGTACCGGAAAGGTGCACCTTCGAAAAAT----  
 Bsbs CGTAACATCGTAAGTGTACCGGAAAGGTGCACCTTCGAAAAAA----  
 Mcst CGTAACATCGTAAGTGTACCGGAAAGGTGCACCTTCGTAAAAC----  
 Rhox CGTAACATCGTAAGTGTACCGGAAAGGTGCACCTTCGAACAAA----  
 Opfa CGTAACATCGTAAGTGTACCGGAAAGGTGCACCTTCGAAAAAT----  
 Paar CGTAACATCGTAAGTGTACCGGAAAGGTGCACCTTCGCTAATCTG--  
 Gozo CGTAACATCGTAAGTGTACCGGAAAGGTGCACCTTCGATAAAT----  
 Ackr CGTAACATCGTAAGTGTACCGGAAAGGTGCACCTTCGATCAAAT---  
 Elev CGTAACATCGTAAGTGTACCGGAAAGGTGCACCTTCGAAAACAAT--  
 Trdu CGTAACATCGTAAGTGTACCGGAAAGGTGTACTTCGAAAAAC----  
 Amoc CGTAACATCGTAAGCGTACCGGAAAGGTGCGCTTCGAACAAT----  
 Hame CGTAACATCGTAAGTGTACCGGAAAGGTGCACCTTCGGAGAACT---  
 Chso CGTAACATCGTAAGTGTACCGGAAAGGTGCACCTTCGACAAAAATAT  
 Lyto CGTAACATCGTAAGCGTACCGGAAAGGTGCGCTTCGAAAAAT----  
 Encr CGTAACATCGTAAGTGTACCGGAAAGGTGCACCTTCGAAAAAT----

Bvar CGTAACATCGTAAGTGTACCGGAAAGGTGCACTTCGAATAACTTAT  
 Noco CGTAACATCGTAAGTGTACCGGAAAGGTGCACTTCGA-TCAATAAT  
 Chsp CGTAACATCGTAAGTGTACCGAGAAAGGTGCACTTCGTAAAA-----  
 Arja CGTAACATCGTAAGTGTACCGGAAAGGTGCGCTTCGAAAAAT----  
 Pase CGTAACATCGTAAGTGTACCGGAAAGGTGTACTTCGCGAAATATA-  
 Trel CGTAACAAAGTAAGCGCACCGGAAAGGTGCGCTTCGAAAAATATC-  
 Lifa CGTAACAAAGTAAGTGTACCGGAAAGGTGCGCTTCGCCTATC----  
 Acur CGTAACATCGTAAGTGTACCGGAAAGGTGCCCTTCGGTAAACAA--  
 Ampe CGTAACATCGTAAGTGTACCGGAAAGGTGTACTTCGAAAAAT----  
 Urja CGTAACATCGTAAGTGTACTGGAAAGGTGTACTTCGAATAAC----  
 Enet CGTAACATCGTAAGTGTACCGGAAAGGTGTACTTCGTAGAAAC---  
 Ptbr CGTAACATCGTAAGTGTACCGGAAAGGTGCACTTCGAAAAAAT---  
 Safa CGTAACATCGTAAGTGTACCGGAAAGGTGTACTTCGGTAAAT----  
 Icae CGTAACATCGTAAGTGTACCGGAAAGGTGCACTTCGAAAAAT----  
 Asmi CGTAACATCGTAAGTGTACCGGAAAGGTGTACTTCGAAAAAT----  
 Foal CGTAACATCGTAAGCGTACCGGAAAGGTGCTCTTCGAAAA-T----  
 Drze CGTAACATCGTAAGCGTACTGGAAAGTGGCGCTTCGTAAAAACA--  
 Rhas CGTAACATCGTAAGTGTACCGGAAAGGTGCACTTCGAAAAAC-----  
 Elac CGTAACATCGTAAGTGTACCGGAAAGGTGCGCTTCGAAAAAC----  
 Kugu CGTAACATCGTAAGTGTACCGGAAAGGTGTACTTCGC-----  
 Plor CGTAACATCGTAAGCGTACCGGAAAGGTGCGCTTCGAAAAAT----  
 Sgun CGTAACATCGTAAGTGTACCGGAAAGGTGCACTTCGAAAAAT----  
 Zaco CGTAACATCGTAAGTGTACCGGAAAGGTGCACTTCGCAAAAC----  
 Zbfl CGTAACATCGTAAGTGTACCGGAAAGGTGCACTTCGAAAAAT----  
 Spba CGTAACATCGTAAGCGTACCGGAAAGGTGTGCTTCGCAAAAAT----  
 Game CGTAACATCGTAAGTGTACCGGAAAGGTGCACTTCGTAAAAT----  
 Thth CGTAACATCGTAAGTGTACCGGAAAGGTGCACTTCGAA-AAAT---  
 Xigl CGTAACATCGTAAGTGTACCGGAAAGGTGCGCTTCGAAAAAT----  
 Hyja CGTAACATCGTAAGTGTACCGGAAAGGTGCACTTCGATAAATAT--  
 Psan CGTAACATCGTAAGTGTACCGGAAAGGTGTACTTCGAAAAACAT--  
 Cupa CGTAACATCGTAAGTGTACCGGAAAGGTGCACTTCGAAAAAT----  
 Mpch CGTAACATCGTAAGTGTACCGGAAAGGTGTACTTCGAAAAAT----  
 Char CGTAACATCGTAAGTGTACCGGAAAGGTGCACTTCGAAAAAT----  
 Pser CGTAACATCGTAAGCGTACCGGAAAGTGTGCTTCGAAAAAC----  
 Prol CGTAACATCGTAAGTGTACCGGAAAGGTGCACTTCGAAAAAT----  
 Plbi CGTAACATCGTAAGTGTACCGGAAAGGTGTACTTCGAAAAAT----  
 Calu CGTAACATCGTAAGTGTACCGGAAAGGTGCACTTCGTCAAGA----  
 Papa CGTAACATCGTAAGTGTACCGGAAAGGTGTACTTCGAATAC-----  
 Sufr CGTAACATCGTAAGTGTACTGGAAAGTGCACCTTCGAAAAACT---  
 Stci CGTAACATCGTAAGTGTACTGGAAAGTGCACCTTCGTTATAT----  
 Taru CGTAACATCGTAAGTGTACCGGAAAGGTGCACTTCGAAAAAC----  
 Rala CGTAACATCGTAAGTGTACCGGAAAGGTGCACTTCGAAAAAT----  
 \* \*\*\*\* \* \*\*\*\*\* \*\* \*\*\* \*\* \*\*\*
