# Supplementary material for: Structure and variation of the mitochondrial genome of fishes
Source: PubMed Central journal article supplement (PMC5015259; doi:10.1186/s12864-016-3054-y), 2016-09-07
Supplement: 12864_2016_3054_MOESM11_ESM.pdf [file 12864_2016_3054_MOESM11_ESM.pdf]

**Additional file 11: Figure S3. Aligned nucleotide sequences of the 16S rRNA gene in mt genomes of 250 fishes.**

See the legend of Additional file 10 for details.

```

Scca      -----ACCTTAA-AGCTAGCCTA-----ACCCACCATT-----AAATAA
Muma      -----ACCTTAA-AACTAGCCTATATACCAATCTAACCAG-----ACCTTA
Erca      -----GCATTAA-AGCTAGCCTAAC--TATGTAT--AACC-----GTAT
Pose      -----GCATTAT-AGCTA-----GCCTGACCA--TGCATC-----TAA
Actr      -----GCTAAAT-AGCTAGCCTCACC---ACACACATCAC-----AAATGA
Scal      -----GCTAAAT-AGCTAGCCTCA---CCACACACGTCAC-----AAATGG
Posp      -----GCTAAAT-AGCTAGCCTCACCACAAACACACAAAT-----A-A
Atsp      -----GCTACAC-AGCTAGCCAA-ACCAAT--ACTTCAAC-----TT
Leoc      -----GCCATAC-AGCTAGCCA--AACCAATATCTT-----AACTT
Amca      -----AGCTGAAT-ATCTAG-CTTAACCACAAAATACCCAA-----ATA
Osbi      -----GCTGCCA-AGCTAGCCAA-TCCAACCCCTTTAAAC-----AA
Pabu      -----GCTACAA-AGCTAGCCGAACTATTTAAACCCTGGA-----CCAAAT
Hial      -----GCTGTAA-AGCTAGCC---TAAAAATGATAACCA-----AAGTGA
Elha      -----GCTAAAT-AGCTAGCCTAACCACCAACACCAAACC-----A
Mlcy      -----GCTAAAC-AGCTAGCC-TAACCCCC---CAAACCC-----AAACAT
Algl      -----GCTGAAT-AGCTAGCCGAACA---AATTAAGT--T-----AAGTG
Ptgi      -----GCTAGAT-AGCTAGCTTA---AACAAA---ACA-----CCAA
Alaf      -----GCCAAAC-AGCTAGCTGAAAAACTAAAAATAACTG-----A
Nock      -----GCTGAAT-AGCTAGCT---TA---AAC--ACTAA-----AATAAA
Anja      -----GCAAAAC-AGCTAGCC---TAA--CCACAATAAAA-----CAA
Gyki      -----AAGCCAAAT-AGCTAGCC-----TG--AACAC-----AACC
Syka      -----GCAAAAA-AGCTAGCCTAAACAT---AACAAACA-----AATGA
Opma      -----GCAAAAA-AGCTAGCTCAA---ATATACCAAAT-----AAACGA
Comy      -----GCAAAAC-AGCTAGC-CTAACATTTAA-CAAAA-----T-
Sasp      -----GCAGAAC-AACTAGCTCGA---CAAAT---TAAA-----ACAA
Eupe      -----GCGAAAC-GGCTAGCCCAACTA-----ACATAAAC-----A
Enja      -----GCCACAA-AGCTAGCTCTA--ACCATATAGC--A-----A-AA
Same      -----ACCAAAC-AGCTAGCTCAGACCATAGAACCC--AA-----GTTGAT
Chch      -----GCTATAC-AGCTAGCTTACCCAA-----TGGGTAA-----AACTCA
Grgr      -----GCCGAAT-AGCTAGCTTAAAC-----TAACGGGAC-----TAACTT
Caau      -----GCCAAAC-AGCTAGCTTAACTAC-CTAATAACTA-----
Cyca      -----GCCAAAC-AGCTAGCTTAA--CTACTTA---ATA-----ACTA
Dare      -----GCTAAAT-AGCTAGCT---TAACCATCAAGAT-----CAACTT
Cost      -----GCTAAAT-AGCTAGCTT-A---ATTACTATACTAA-----ATTA
Leec      -----GCCAAAC-AGCTAGCTTAAAC---ATT---AAAT-----TAATAC
Crla      -----GCCAAAC-AGCTAGCTTAAACA---CCTAGAC-----AACTA
Clmc      -----GCTATAA-AGCTAGCTTAAAC---CACCAAAACC-----AACCC-
Phin      -----GCCAAAA-AGCTAGCTTTCTAACCAAAAATCATAA-----CAC
Icpu      -----GCTAAAC-AGCTAGCTTAAATTA---CCTAAA-TA-----CCTAAA
Psto      -----GCTAAAC-AGCTAGCTTAA-----ACACCAAAAA-----TTACCC
Cora      -----GCCATAA-AGCTAGCTTAAACACATCAAC-CAACT-----A
Eisp      -----GCTAAAC-AGCTAGCAAAC---AC---CAAGATCA-----TCAA
Apal      -----GCCAAAA-AGCTAGCTT---AATTATTAAGACA-----ACC
Eslu      -----GCTCGCC-GACACACCCGGAT-----TAAAAAC
Dape      -----GCTGACT-AGCTCGCCGACACCCC--CGGT-----AAATA
Glse      -----GCTAAAC-AGCTAGCCCCACA---ATTGGTTAAC-----AC
Naar      -----GCTGAAA-AGCTAGCC---TAGACAT-TTATT-----TAACAC

```

Baoc -----GCTGAAA-AACTAGCCTAGATATT--TTTTTAACA-----T  
Opso -----GCTGAAC-AGCTAGCCTAA--GCATTTGAATA-A-----CACA  
Alte -----GCTCAAC-AGCTAGCTTAACCGCCTTAGAATAAAC-----T  
Plap -----GCTCAAC-AGCTAGCTTAA--CCGCCTAGA-ATA-----AACC  
Plal -----GCTAACT-AGCTAGCCAAACAC-CTGG--ACTA  
Sami -----GCCAAC-AGCTAGCCGAACACTTGGAT-TAATT-----T-  
Rere -----GCCAGTT-AGCTAGCC-AACC-ACT----TGGATT-----AA-TAC  
Gama -----GCTGATC-AGCTAGCTCGCA--CATCTGGTTAATT-----ACCA  
Onmy -----GCTGACT-AGCTAGCCAACATATTTGGT-CC-----AACAC  
Sasa -----GCTGACT-AGCTAGCCAA-CACACTTGGTCTAAC-----  
Cola -----GCTGACT-AGCTAGCCCACACATTTGGTCT-AACA-----C  
Dita -----GCTGAAT-AGCTAG-CCTTATACACCACGGCCAAC-----ACA  
Gogr -----GCTAACAA-ACCTAG-CACATG-----CC-----CCGACA  
Chsl -----GCTGAAT-AGCTAGCCAAC--CCCAAAGG-CCC-----CC  
Atja -----GCTTAAAAGCT-AGCCTACTTAATAGTTCAAAAACCT-----  
Iido -----GCTTAAA-AGCTAGCCTACCT---AAAGTTAA-AA-----AAACTT  
Auja -----GCCAAC-ACCTAGCCC-CACAGACAAATAAACTA-----A  
Chag -----GCTCAAC-AGCTAGCCCAAACAATAAGC-T--AA-----ACCCCC  
Hami -----GCCACC-AGCTAGCCCCACCCTAATATA-----AAA---  
Saun -----GCCACC-AGCTAGCCCCACC--C-CACAATAA-----ATA  
Nema -----TCCTAAC-AGCTAGCCCC--CCCCCG-CTAA-----AA  
Disp -----TCCTAAA-AGCTAGCCCAA----CCCCTGAAAA-----CGACCA  
Myaf -----ACCTAAA-AGCTAGCCTAACT-----CAAAAA-----A  
Lagu -----GCTCAAC-AACTAGCTCGCCCC-----C-----CCCCAA  
Trtr -----CGCTAAAT-AGCTAGCCC--AAACAATAACT-----AAACT  
Zucr -----TGCTAAAT-AGCTAGCC-----CAAAT--AACAT-----TTAAGT  
Pxja -----TGCTAAT-AGCTAGCCCAAATTATCTCA-CC-----AAAA  
Pxlo -----TGCTAAT-AGCTAGCCCAA--ACTACCCACC-A-----AAAA  
Ptr -----GCCTAAA-AACTAGCCC-ACCCACCACAA-CAATA-----AGA  
Apsa -----AACCTAAA-AGCTAGCCCGCC--CATAACATAATA-----  
Cabe -----CGCCAGC-AGCTAGCC--TTAACCCACGCCT-----AAAAG  
Bzze -----CGCCTTAA-AGCTAGCAC-GAACCCCAAAAAT-----AACAA  
Siim -----AGCCTAAA-AACTAGCTCAACCAT-TAAAAAC-----AACAA  
Ctru -----CGCCTAAC-AGCTAGCCTCCCCACAAAAACAAACC-----C  
Dpbr -----CGCCTAAC-AGCTAGCCTCACCCG----TAAAAAC-----AACCA  
Caki -----AACCTAAG-AGCTAGCCTAC-----TCAATCTTAAA-----TTTATA  
Phja -----TAAC-GCCTAA--CAGCTA---GCCTAA-AC-----CAA--A  
Brsp -----TTCACCTAAC-AGCTAGCC--TCA--CCTCTTAAAA-----TCT  
Gamo -----GCCTAAC-AGCTAGCCT-----CAAAAATAA-A-----A  
Lolo -----TGCTAAC-AGCTAGCCTCA--ACAATCAAATTTT-----ATTA  
Batr -----AACACTGAGCTGTCTTACGCCTACA--GCTAGTCATAT-----TTC  
Prmy -----ACTGCCA-----ATTTGCTA-GT-----CAAATA  
Loli -----CACTCAAC-AGCTAGCCAC-CCA--TCTAATCACAA-----CAG  
Loam -----TACCTAAT-AGCTAGCCACA--CCAATAAACACA-----ACAA  
Chab -----CACCACAC-AGCTAGCC-TTACAACCT--AAAGAC-----AA-CAA  
Chto -----CACCACAC-AGCTAGCCTTACAA---CCTAAA-GA-----CAACAA  
Majo -----TGCTTAC-AGCTAGCCCGT-----CCAAATAAAA-----GAAACA  
Hlst -----CAGCCCTGA-AACTAGCCAAAAC--CTTCAATC-A-----CAACAA  
Clpe -----CACCCCC-AGCTAGCCCGACAGTTTA-AAACCAAC-----C-A  
Mlmr -----CACCTAA-AGCTAGCC----TTTTAATTAAGA-----CACAC  
Crcr -----TCCTAAC-AGCTAGCCCA-CCAACGCAACTAATAC-----TT  
Muce -----TCCTAAC-AGCTAGCCTACC--AACGCA--ACTA-----ATAC

Bege -----CACTCAAC-AGCTAGCCCTACC---ATATA-CT--T-----CAACAC  
 Mela -----CGCCCACT-AGCTAGCTCG-CACAAC--ATCATAAC-----AT  
 Hats -----AACGCCTAGC-AGCTAGCCCGCTCAAACAAAAAC-----AACAC  
 Orla -----ATCTAAAA-AGCTAGCC---CAAAGCC-TTAAT-----TAAAGA  
 Cosa -----CCCACA-ACCCAACACCAATTACCCAT-TAT-----T-  
 Exsp -----AGCCAAAC-AGCTAG-CCCATCCCATTAAAACCATC-----ATA  
 Depa -----CGCCCAAA-AGCTAGCCTAC---AACCCAAAACCA-----ACAC  
 Rima --ATTATTCTGACACCTAAC-AGCTAGCTTACCTA-----TAAACT-----ACACCA  
 Fuol -----AGCCCAAC-AGCTCGCCTCC-----AACCCATAAT-----TCAACA  
 Gmaf -----AACCCCTAT-AGCTAGCCC--CCA-----ACCTAAAA-----AAATAT  
 Xeei -----AGCCCAAC-AGCTAGCCTACTTACCCTAAAACCAAC-----AAT  
 Pros -----CGCCCCAC-AGCTAGCCC-ACAA---CATTTA-AT-----CAACAA  
 Scmi -----CGCCTCAC-AACTAGCCCAAAGA--TATTTTAAATC-----AACAA-  
 Rolo -----CGCCCAAC-AGCTAGCCCGAAACCCCAACCAACAT-----CCCAAC  
 Cere -----CACCAAAC-AGCTAGCCA-CAAACCATGAGT-----AATCC  
 Daga -----CGCTAAAA-AGCTAGCC---CAAGATCAGGGGA-----TAATAC  
 Anco -----CGCCCAAC-AGCTAGCCCACACCCACC--CCCCAAC-----AA  
 Dmve -----CGCCCAAC-AGCTAGCCCA-CAA--CCAACCCACAA-----CAA  
 Dmar -----ACGCCCAAC-AGCTAGCCCAAA---AAC-AACC-CA-----CAACAA  
 Anka -----CGCCCAAT-AGCTAGCCCA---ACCCACA-C-----AACAA-  
 Moja -----TGCCCCAC-AGCTAGCCCACACCCCCCCCCCAACAAACAACCATT  
 Hoja -----AGCCAGC-AGCTAGCCACAATA---CCACCCC-----AACAA  
 Bede -----CGCCCCAC-AGCTAGCCC-A--CAAATCCAACCA-----ACAA  
 Bosp -----CGCCCCAC-AGCTAGCCCAAAAATCCAACCAACAA-----  
 Mysp -----TGCCAAAA-AGCTAG-CCCGCCTACC--AAACTAAC-----AAC  
 Osja -----CGCCGAAC-AGCTAGCCC---GCCCTCCCCCTA-----ACAA  
 Sgro -----AACCCAAC-AGCTAGCC-CACCTACC-----AACCT-----AA-CAA  
 Pzpa -----ACGCCCAAC--CGTAGCCCAAAA--AACATTTATAA-----ATT  
 Zeja -----CTCCAGT-TGCTAGCCCAACAAACGTTCCCTAAAAA-----T  
 Znne -----CACCTAAC-TGCTAGCCCCCA---CC-CATTT--T-----TAAACC  
 Zefa -----CGCCCAAC-TGCTAGCTCA-ATAGTATCATTAAATT-----  
 Acni -----CGCCCAAT-TGCTAGCTCAAAA---GAC--ATTTT-----TAAAAG  
 Ncrh -----CGCCCAAT-TGCTAGCTCAA-----AAGACATTTT-----TAAAAG  
 Agca -----CGCCCAAC-AGCTAGCCCTCC-CCCAAAACCTAACA-----A  
 Hydy -----TGCCAAA-AGCTAGCCCACCT---AACCAACCTC-----AAATAA  
 Gsac -----TGCCTAAC-AGCTAGCCCGCCCAACAATTTCAACG-----A  
 Pevo -----GGCCTCAC-AGCTAGCCCCACTA----A--AAATA-----CAACAA  
 Hiku -----TACCCATA-TGCTAGCTCAAACAC-----TAAATTC-----AAACAA  
 Inpa -----CACCTAAC-AGCTAGCCCACCCATCC---CCC-----CCACAC  
 Auch -----CGCCGAAA-AGCTAGCCT-A--CTACGCAAACACA-----ACAA  
 Fico -----TGCCAGC-AGCTAGCCCCAC-CCCAAGAGCAACAA-----  
 Macs -----AGCCTTAC-AGCTAGCCTACAATA--AAAAGC-----AACAA  
 Moal -----TGCCAAAC-AGCTAGCTTCTA-ACCAAAAAC-AACA-----A  
 Syma -----TACCAAAC-AGCTAGCAGC-CCTAA--AAACACAAC-----AA  
 Maf r -----CACTAAGC-AACTAGCCCCACCCACCAAAAACAATA-----AAC  
 Dcpe -----CGCCCCC-AGCTAGC-CCACAT----C-TAAAAG-----CAACAA  
 Dct i -----CGCCCCC-AGCTAGCCCAC----ACCTAAAAA-----CAACAA  
 Hehi -----CGCCCAAC-AGCTAGCCACA--AACACAAC-AACA-----ACCA  
 Stam -----TGCTTAAC-AGCTAGCCCCCTCT--ACCAAGAACAA-----CAA  
 Hogi -----CGTCCAAC-AGCTAGCGCATT---AACCAATCAC-----AATATA  
 Erzo -----CGCCTAAC-AGCTAGCCCACCCACACAACCCCAACA-----A  
 Hxot -----TGCCTAAC-AGCTAGCCCACCAACAATTTCAACA-----A

Core -----CGCCCAAC-AGCTAGCCCA--AC---TAAGAAATT-----TCAACA  
 Apve -----CGCCCAAC-AGCTAGCCCATTAA--ACAATCACAA-----CAA  
 Latj -----CGCCTATT-AGCTAGCCC--CCACTTAAAC-A--AA-----CAACAA  
 Laja -----CGCCCAAC-AGCTAGCCCCA-----CCAATCAAGAA-----CAACAA  
 Syja -----GACGCCCAAC-AGCTAGCCTCTCC---ATCAAAAAAC-----AAC-AA  
 Epme -----CACTGACC-CGCTAGCCCAACCAAACCAA--A--AA-----CAACAA  
 Grse -----CGCCGACT-AGCTAGCCCG-CTTATCCAAAAACAAC-----AA  
 Clja -----ACACTAACA-AAATAGCCTGACC-----ACCTAA-AA-----CAACAC  
 Ogcy -----GCCTAAC-AGCTAGCTCACCCAA--CATAAACCA-----AAAGTT  
 Plna -----CACCTATC-AGCTAGCC--CCTCCAACAACACCAA-----AAT  
 Lema -----AGCCCAAC-AGCTAGCC-CCACACCC---AAAAAC-----AA-CAA  
 Etzo -----CGCCCAAC-AGCTAGCCCCCAA---GCCAGA-AA-----CAACAA  
 Apse -----AGCCATT-AGCTAGCTCGCACC-----CCAAAATG-----CAACAA  
 Epde -----AGCCAAAC-AGCTAGCCCCCTCA--ACCAAAAATAA-----CAA  
 Slja -----GGCTCATC-AGCTAGCCCCACCATTAGTGCAAGTACTAA-TAATTATT  
 Bsja -----TGCTAAAA-AGCTAGCCCCCTCCCCAAAAACAACAA-----  
 Ecna -----AGCCAACC-AGCTAGCCCTAAT-ACTAAATTC--AA-----CAACCA  
 Cohi -----CAGCTTAATT-AGCTAGCCTA-CCTAAC--AACCCAAT-----CA  
 Caar -----TGCTTATT-AGCTAGCCCCCTCAA---CTAAACTT-----AACAA  
 Came -----TGCTTATT-AGCTAGCCCCACCA--ATCAAACCCAA-----CAA  
 Mema -----CACCCACA-AGCTAGCCC-CACCCACAACAAC-----AACAA  
 Lenu -----AGCCCAAC-AACTAGCCCCACCCAC--CCAAACAC-----AACAC  
 Brja -----CGCCAACC-AGCTAGCCCCGCCCAACAAAATAACA-----CCC  
 Plma -----AGCCAACC-AGCTAGCCCACATC--AGTAAAAACAA-----CAA  
 Emst -----CGCCCAAC-AGCTAGCCCACCC---CAACAAAA-AC-----AACAAA  
 Ptti -----CGCCCAAC-AGCTAGCCCCTCTTAACCAAAAAGCAAC-----AAA  
 Losu -----AGCCATT-AGCTAGCTCACCCCCAAAAACTTAAC-----CTG  
 Geoy -----TGCTGACG-AGCTAGCTTTA--ACCCTCGAACCTA-----ACGT  
 Dipi -----CGTGCCCAAC-AGCTAGCCCAA---TAATTAAAATCA-----ACAA  
 Pama -----CGCCGATC-AGCTAGCCCACCCAACAAAAATC-----AACAC  
 Leob -----AGCCCAAC-AGCTAGCCCAACTCCCCAAAACAACCA-----  
 Neba -----CGCCCATC-AGCTAGCCTATCAACTTAAAAACAACA-----A  
 Pdpi -----CGCCAATC-AGCTAGCTCCGCC---A-TAACTT-----CAACAA  
 Nimi -----CGCCATT-AGCTAGCCGC-CCCAGCCAAAAACAAC-----AA  
 Uptr -----TGCTTAC-AGCTAGCCCACCAA-----ATTAAG-----AAACAT  
 Pesc -----TTAACCAAGC-AGCTAGCCCCCCCCCCCCCCCCCATT-----CAAGTA  
 Baar -----CGCCCACC-AGCTAGCCCA-TCCAACCAAAAAACAAC-----AC  
 Moar -----CGCCAATAGCTAGCCCCCTAAACCA--A---AAACAA---CACA-  
 Toja -----AGCCATT-AGCTAGCC-CCATCACTTTACAAAAAC-----AA-CAA  
 Chau -----AGCTCAAC-AGCTAGTCCACCCAACCAAAAAAC-AAA-----CTCCCC  
 Chse -----TACCAAAA-AACTAGCCCCCCT---CCCCAACAGC-----AACAA-  
 Enar -----AGCCCAAC-AGCTAGCCCCCCT---TTACCAAAAA-----CAACAT  
 Hpty -----GGCCCAAC-AGCTAGCCCCCTCAACCAAAA--GATAA-----CAAATC  
 Nana -----CACTCAAC-AGCTAGCCCCCCCCCCCCAAA-AAGCA-----CAACAT  
 Mcst -----AGCCAACT-AGCTAGCCCCATCATTACCGAGACCGAAAA---CAACCA  
 Rhox -----CGCCATT-AGCTAGCCCCAACTCAAAACCAAAAAAC-----AACCA  
 Opfa -----TGCCCACC-AGCTAGCCCCCAGACCAAAAAAC-----AACCC  
 Paar -----CTGCCAAT-AGCTAGCCTAA--ATGAACTTAAC-A-----AAAA  
 Gozo -----TGCCCAAC-AGCTAGCCCC-ACCCCTAAAAAA-----CAACAG  
 Ackr -----CACCCACC-AGCTAGCCT-ACAA---TAAAAA-CA-----CAATTA  
 Elev -----GCCATA-AACTAGCCCC---CGCCTGA-ATAA-----GTAA  
 Trdu -----TGCCCAAC-AGCTAGCCCATTCA-----TCAACCC-----CAAATC

Amoc -----TGCCTAAC-AGCTAGCCC GCCCTTATAAAATC-----ATCAA  
Hame -----AGCCTAAC-AGCTAGCCCA-AACCCCTAAATACAAT-----  
Chso -----CGCCCAAT-AGCTAGCCC ACTCAC-TAACAAACAACA-----CACC-  
Lyto -----AGCTTTAT-AGCTAGCCC ACT--CAAACAAC-CTCA-----ACCA  
Encr -----AGCTTTAT-AGCTAG-CCCGCTCAAACA ACTTCAAC-----ACC  
Bvar -----AGCCAACT-AGCTAGCCC ATAGAAACAAATTCAACA-----C  
Noco -----TACCGAAC-AGCTAGCCCCCA---AGACA ACT--T-----CAACAT  
Chsp -----AGCCTTAC-AGCTAGCCC ACCAC---TAAAAA-----CAACA  
Arja -----CGCCCAAC-AGCTAGCCC ACCCAAGCAAGTTCAAC-----AAA  
Pase -----CACCCAAC-AGCTAGCCCCC ACCTAAAATC-----AACTA  
Trel -----AGCCCTAC-AGCTAGCCTGATCACA---CAAATGC-----AACTG  
Lifa -----CACCTACC-AGCTAGCCGTAACATTAAGCAAAA-----TA  
Acur -----TACCCATC-AGCTAGCTCAAAGTC-TAATATC-----AACAA  
Ampe -----TGCCCAAC-AGCTAGCCACCACCCCAAA--AACAA-----CAAACC  
Urja -----TCGCCAAA-AGCTAGCCCCACC---CCCAAAAATC-----AAAACC  
Enet -----TGCTTAAA-CGCTAGCTTAATTCCACCCC--TAACC-----T  
Ptbr -----GCCCACT-AGCTAGCTCTC--ACATTAAGT--A-----ACAA  
Safa -----AGCCAGC-AGCTAGCCTAACCA---CAAACCT-----AAAGC  
Icae -----ACGCCAAC-AGCTAGCC---CAACT-CAACAAAAC-----CAACAA  
Asmi -----CACCAAAT-AGCTAGCC-CACCCAAT---ATAACT-----AA-TTA  
Foal -----GGTTTAA-AACTAGCACAC--TGACATATTT-TTA-----AAATTA  
Drze -----ATCAAAAC-AACTAGCC---CATAAA--AAAAT-----CAATCA  
Rhas -----CACCCAAC-AGCTAGCCCCCCCC---CCTTAA-AA-----CAACAA  
Elac -----ACACCCAAC-AGCTAGCCCCTCC--CTCCA ACT--A-----CAACAA  
Kugu -----AGCTCAAC-AGCTAGCCC GACC---ATACAAAAC-----AACCAA  
Plor -----CGCCCATC-AGCTAGCC-CCTCCCCT---AAAAAC-----AA-CAA  
Sgun -----CGCCATT-AGCTAGCCCAAC--ACCCAAA--ACCA-----ACAC  
Zaco -----CGTCCAAC-AGCTAGCCCCCCT--CCCAA--AAG-----CAACAA  
Zbfl -----CGCCCAAC-AGCTAGCCCC---TATATCAAATA-----CAACAA  
Spba -----CGCCATT-AGCTAGCCCC ACCTATAAACC-ACC-A-----ACAA  
Game -----AGCCGACC-AGCTAGCCCCCTCCACCAAAAAC-----AACAA  
Thth -----TGCTGACC-AGCTAGCCCAC--CCTAACAAAAACA-----ACAA  
Xigl -----CGCCCA-TCAGCTAGCCCC ACCC--ACCAATAACAA-----CAA  
Hyja -----TGCCGACC-AGCTAGCCC G-CCCAACAAAAACAAC-----AC  
Psan -----TGCCAACC-AGCTAGCCC GCCCCCCCAACAATAAA-----CAACAA  
Cupa -----CGCCAAC-AGCTAGCCC ACCCC---AATAAAAA-----CAACAA  
Mpch -----TACCCAAC-AACTAGCCT--CA---AACCAAACC-----AA-CAA  
Char -----AACCAAAC-AGCTAGCCCC-ACCCATAAAACCAAA-----AA  
Pser -----CACCCATT-AGCTAG-CCCACCCAACCAAAAACAAC-----AAA  
Prol -----CGCCATT-AGCTAGCC---CAACCCCTTCACC-----TAACAA  
Plbi -----CGCCTATT-AGCTAGCCCC ACCCC--TTAATACAAC-----AAACCC  
Calu -----CACCCACA-GGCTAGCCCAACCAACCA--AATCCAC-----CAA  
Papa -----CACTAGCA-AACTAGCCCAAC---ACCCAAA-CA-----CAACGA  
Sufr -----AGCCCAAT-AGCTAGCCTACTT--ACATAAA--AT-----CAACAA  
Stci -----AGCCCACT-AGCTAGCCCAAC---AAT-TAAA-AC-----CAACAA  
Taru -----CACCTAAC-AGCTAGCCC--CCACCCACCCACAAC-----AA  
Rala -----CGCTTAAA-AGCTAGCCCCCCCC---CCAAAAGC-----AACCC

|      |                                                   | 1  | 1'    |
|------|---------------------------------------------------|----|-------|
| Scca | T--AACACTATTAATTCTA--CTTACATTACA--ACCTT-A--AACT   | AA | AAC-A |
| Muma | TAGATCTAATTTATACC-----AC-----AA--AC---TTTTAACT    | AA | AAC-A |
| Erca | AAAAATATTTAAAT-----A--AATACTCAT---AAAAC-AAAAC     | AA | AAC-A |
| Pose | CCA-A-ATAAATATT---TAAATAAACACACA--AAAA-ATAAAAAAC  | AA | AAC-A |
| Actr | ATATTTATATATA-ACCCC-CCATAAGATCAA--AAAA--ATAAAC    | AA | ACC-A |
| Scal | ATACTTATACATAAACCCC--CATAAGATCAA--AAAA-AT-AAAC    | AA | ACC-A |
| Posp | ATATTTATATATAACCCCCCATAAAAAACAAA-----AAAATAAAC    | AA | ACC-A |
| Atsp | ACAAATATACATAACCCCACATATT--CTTAA--AA-ACATAAACCC   | AA | ATC-A |
| Leoc | ACAAATATACATAACCCCA--TAAATTTTTAA--AGACCTA--AACC   | AA | ATC-A |
| Amca | CAC-AAATATAAATACCCTCACATACCATTAA--ACTAAACCAA-CC   | AA | ACC-A |
| Osbi | ACAACAATATATACAGGCCAATAACCCTAAC--CTTCAAAC---T     | AA | ACC-A |
| Pabu | ACTCAACTACATATAGCCAGACAACATATTA--AAATACT--AACT    | AA | AAC-A |
| Hial | ACAAACATATATAACCCCA-CATGT---TTTG--AAA-GTACTAAAC   | AA | ACC-A |
| Elha | CACAACCATAAATACCCAACCACACACTAACA--GAAACC---ACT    | AA | ACC-A |
| Mlcy | ACAACCATAAATACCACCA-CACAACAAGA-----CTCACC--AACT   | AA | ACC-A |
| Algl | ATCA--ATTATAG-ATAGC-GAGTTGTTTGTAGT--GGCGT--ATGGCT | AA | ACC-A |
| Ptgi | ATGAACAACCATAGATATAAA--AGTAGAAC--AAAACC-GCAAC     | AA | ACC-A |
| Alaf | AAACCATAAAT-ACCCACAA---CCAAAA--CCCA---AACC        | AA | AAC-A |
| Nock | CCATAAACCATACATACTC-ATTCCCCCAACA--ATTG-----AAAC   | AA | AAC-A |
| Anja | ATGACCAAGCATATATAACAA-AATAAACCCA--AATATA--AAAT    | AA | AAC-A |
| Gyki | GTAACCCCAAATATATAT-ATAAAGAACCTA--TAATTTTAC-ACT    | AA | AAC-A |
| Syka | ACAACCATATATACCACACCCAAAG-----AAA-C---ATTAAACT    | AA | AAC-A |
| Opma | CCAACCATAAATAAT-----AGACAAA--AC--A-AT-AACT        | AA | AGC-A |
| Comy | AATCAACCATAAATTACA----AAACAAA-AA----ATTTAAAA-AT   | AA | AAC-A |
| Sasp | A--CAACCAAACAAATATATAACAAAACCTAATAATTTAATTAATT    | AA | AAC-A |
| Eupe | AGTAACCAC-TATAAATCAAAAA---TAAAA--CTAA-----ACT     | AA | AAC-A |
| Enja | TTAATAATCTAATTACCTACTTAAACAATA--AAAATAGAAACC      | AA | ATC-A |
| Same | AATAT---AACTAATTCTTCAAG-AAGTTGA--CAACGCA--AACT    | AA | ACC-A |
| Chch | CAACATTTCTCTA-CCCAAAACAAAACCCCAA--AC--ATTAAAAAC   | AA | ACC-A |
| Grgr | TAGAATATAGATATCCCC--CCACAACCTAA--AATGAAACAAAAC    | AA | ATC-A |
| Caau | AACAATATAAATAAATAAAGATAGACCTAACA--CTAAAAAT----T   | AA | ATC-A |
| Cyca | AACAATATAAATAAACAATAAAT-AAGCCTAAC--ACCA---AACT    | AA | ACC-A |
| Dare | AAAAACATCAATAACCTAT-AATCAACCTAAA--ACC-ACA--AACT   | AA | ACC-A |
| Cost | ATAA-CATAAATAAAGTACAA--AACCTAAA-----ATTATTAATC    | AA | ATC-A |
| Leec | AACAACATAAATAAATAAATAAATGAACCTAAA--T--CTACAAACT   | AA | ACC-A |
| CrIa | AACAACATAAATAAACAACA-CA-AA-ACCTTA--AAAAATAAAC--T  | AA | ACC-A |
| Clmc | AACAACATTCAACAATTTT-ACTAAACCCAAA--CATCACA--AACT   | AA | AAC-A |
| Phin | CACCATTCCCACCCACCTTACACA-ACACACA--ATAACTTTAATT    | AA | AAC-A |
| Icpu | ACAAC--ATTACAACATT--TAAAAACCTAC--ATACTCCAAACT     | AA | AAC-A |
| Psto | ATCAACATCAAAAATCTTT--AAAAGACCCCA--ACAAC-TCAAATT   | AA | AAC-A |
| Cora | ACAAC-ATTAATAAGTT-TAGAAAAACTAAA--TTAAT---AACC     | AA | AAC-A |
| Eisp | A-CAACATTACCACATCTTCT--TACACCACC--ATAAACTAAACC    | AA | ACC-A |
| Apal | TAACAACATTATCTTGTCTTACACAACCCAC--C---CAACTAATC    | AA | ACC-A |
| EsLu | CCCAACATATATA--CCCC-AACAAACCTTTA--AAAAATCAA--C    | AA | ACC-A |
| Dape | ACCCCTATAGATACCCGAACAAAC-CTTAAAC--TTAAAC---AAC    | AA | ACC-A |
| Glse | CACAATATAAATACCCCTACACAAC--CTTAC---CA--AATTAAC    | AA | ACC-A |
| Naar | CACAATATATATTCCTTTG-CATATCCTGCAC--T--AGATTAAC     | AA | ACC-A |
| Baoc | CACAAT-ATAAATTCCTTTGCATA-CTTGCA--CTTACCT--AAAC    | AA | ACC-A |
| Opso | ACAATATACTAT--ACCCCCACATAACCTA---CATTAATTAAC      | AA | ACC-A |
| Alte | AACAACATAAATAACCCAACAAA--ACCAAA--ATA-AT--AAAC     | AA | ATC-A |
| Plap | GACAACATAAATAACCCAACA--AAACCCAAA--AGTAA---TAAAC   | AA | ACC-A |

Plal ATTTTACATTATAAATATTCCCTCACAACCTGACAACCTTG--TGAACAAATC-AAT---  
 Sami ATTAGTATAAATAACCCCTCATAACCTAG-AA---GCTTGTGA-ACAAATC-AAT---  
 Rere CACAACATAAATACCCCT-CACTACTTAGAG--AGTAAG---AAACAAATC-AAT---  
 Gama --CGACATACCTGAACCCGCA--TA-ACAAAC----TACACCCCATCAAACC-AAT---  
 Onmy CACAACATACATACCCCAATAAA-ACTTAGAA--TTAAGT---CAACAAACC-AAT---  
 Sasa ACCCAACATACATACCCCTATAAACTTAAA--ACTAAGTCAA-CAAACC-AAT---  
 Cola CACAACATATATACCCCCACAAAAC-TTAGAA--TTAAGTC--AA-CAAACC-AAT---  
 Dita CTGATTAGCCACAACCCACCAAGACCTGAATA--C---AACGA-ACAAACC-AAT---  
 Gogr GCCCCCAACAACAACCCCTAATAAAACCCCCAG--CCCACA---AAC-AAACC-AAT---  
 Chsl CTCCCAACAACCTGCCTTTAA--AAATTTAT--TTCCAACCCAACAAACC-AAT---  
 Atja AAACATAGAAATAAACTA-AGAAACCCAAAA--GAACAAGA---CAAACC-AAT---  
 lido ATACATAAACATAAACT--AACAACCCAAAA--AAA---TGAAACAAACC-AAT---  
 Auja CTCTCTATTAATT-TTATAAAAAAGATCGAAC--ACAAAA--TAACAAAAC-AAT---  
 Chag ACTAT--TTAATAATTTATAACA-CACTAAA---TAAACT--AAATAAAC-AAT---TGT  
 Hami ACCCCAAAATATATTCCTTTCTA---GAATAT--ACA--A--AAACAAACC-AAT---  
 Saun TTCCATATATATACTTCC-----CCCACC--CCGCAATTAACAAACC-AAT---  
 Nema CAACCC-CCTATAAATATTTACTCATT-----TTTCTTCCCTAA-CAAACC-AAT---  
 Disp CCCTTTA--AAT-----CAAGTCCCTAA--AAAAC-ACTCAACAAACC-AAT---  
 Myaf AACAACCCCATTTAAATTAACCCCTTAAAA--CAAGC-----AACAAAC-AAT---  
 Lagu C---ATAAATATA-ACCAC-AGCAAACCTCCC--CCCAGA-GTAAACAAACC-AAT---  
 Trtr ACTTATACAACCTAACTTAATTATACATTTAA--A-ATGTA--ACTTAAACC-AAT---  
 Zucr AGAATATATAACTAATCTA-GTAATACACTTA--AAATATAA--ATTAAATC-AAT---  
 Pxja TTAATTATAAATACCCCTTAATTAACCTTAAAA--A-ATTTA--AA-CAAACC-AAT---  
 Pxlo TTAATTATAAAT--ACCCCTTAATTAACCTT---AAAAATCTAAACAAACC-AAT---  
 Pctr TCTTACTAAACCCCCACAAGAACTAAA--AA-C---AAC--AAACAAATC-AAT---  
 Apsa TCAAATATTAATAACCCAAAAGAAAATA--A--ACCTATAAA-ATAACC-AAT---  
 Cabe AAACACTAACCAGGCTAAAAGGACACCAACC--C-----CACCTAAAC-AAT---  
 Bzze CCACCCATCAATAACCTTATAAAACATACACA--TGAC-----AACAAACC-AAT---  
 Siim ACAGACACTAATAACCCATAAAA-ACCTAAA--ACCAC---AATCAAATC-AAT---  
 Ctru AA-ACCATTAATACCCCGAATGC--CCGACG--CACTCAT--AATTAACC-AAT---  
 Dpbr CAAACATAAATACCCCCACATACCCTACA-C--ACC--TACAA--TAAACC-AAT---  
 Caki AT-AGAATTAAAAACCTTC--AATATACAAA-----GTAAACC-AAT---  
 Phja CTTAAGATTTACATAAAG---TTAAAGCTTA--CAATAACTAAAATAATC-AAT---  
 Brsp AT-----TATGAAATAA-GATCAAATTA--TACATTT-AAACAAAC-AAT---  
 Gamo ATTTT-ACTATTATGGACCTAAAACCTCATAA--TAAACTT--AAACAAATC-AAT---  
 Lolo -TTG-TGAAACTAAAACCTCA-----TAAT-----ATAATTAATTAACC-AAT---  
 Batr CCCTTCCCCTCTTTATCATAAAAACAT-AAA--CTCA--CACTCAAAGT-AAT---  
 Prmy T-AACAACATAACCCACA-AAATCCCCTTAA--ACCC---TAAATAAAT-AAT---  
 Loli ATAAGTATAAATAACCCCTAA-GACACCCCG--TTTTTAT-AAACAAACC-AAT---  
 Loam AACTACATAAATACCCCTAAC-CACCCACCCACCCACCTTAAACAAACC-AAT---  
 Chab ACAAACATTAATTACCCCC-AACAACCCAAAT--GCAAGTCG-AAACAAAC-AAT---  
 Chto ACAAACATTAATTACCCCC--CAACAACCCAA--TGCAAGTTGAAACAAAC-AAT---  
 Majo TATCACATTAATAACCCCT--AATACGCTTAA--CACCA-ACTAAACAAATC-AAT---  
 Hlst CACCATATAAATAAACCCCA-AATGCAATAAGA--ACTT--TACACCAAACC-AAT---  
 Clpe GAGCACATCAATAACCCCAACTGCCCTAACAA-----TTTCTTAACAAACC-AAT---  
 Mlmr ACAAACATCAATAACCCCT-AAA--ACCCTAC--ATAAACCTTAAACAAACC-AAT---  
 Crcr ATT--TATACACACCTCCCAATGTA-CTGAAA--TA--AACAAACCAAACC-AAT---  
 Muce TTATTTATATACACCTCCCAA--TGTACTGAA--ATAAAC-AAACCAAACC-AAT---  
 Bege -TCAAC-TATTTATACCCT-AAAAACACTTA--ATACA--TCAACCAAACC-AAT---  
 Mela TTAGATATAGATATACAC----ACA-CCAACA--AATAAGC-AAACAAATC-AAT---  
 Hats ATAAATACTCATAACCCCTAATACACCCAACA--ACCA-----AACTAAATC-AAT---  
 Orla CCAAATAT-TACTAGTAAT-TAAAAACCCAAG--G--ATATTAATTAATC-AAT---

Cosa AATAACCCCTAAAACACG----AAACAAA-AT-----AA-ACAAATC-AAT----  
 Exsp AAC-ATATAATTAACCCCTAAGTTACTAACAA--A---AACTAA-CTAAACC-AAT----  
 Depa CCACT-ATTAATAACCCCTAAAACACT-----TAAAAAATTAACAAACC-AAT----  
 Rima AACACTATTATTACCCCC---TAACATCTTAA--CAAACAATAAT-TAAAC-AAT----  
 Fuol ATCCTTATCAATAACCCCT--AATTCCTTTAT--TCAAT-T--AATTAAATC-AAT----  
 Gmaf AAATATATTTCT---TTCC-AACCCAC-----CTCA-TCAAAC-AAT----  
 Xeei AAAAATATTACTAAACCCAAATTCCCTTAACA--ACCTAATC----TAAACC-AAT----  
 Pros CCAAACATAAATAACCCT--AAAAACCCCAA--ACAAAAC--AAACAAACC-AAT----  
 Scmi CTAATTATTTATACCCCTT-GAATTCCCCAA--GAGA--C--AAACAAACC-AAT----  
 Rolo ATAAATACCCTTAAATACC--CCTAATTT-----AAAT-AC-AAACAAACC-AAT----  
 Cere CCCCCATAATTAACCTAAAATAAACTAAACC-----AAGAAAT--AAATC-AAT----  
 Daga CTCAATATAATCCTCCCA-AATAA---TTTC--AAG-CAAGTACGTAAATC-AAT----  
 Anco ATAACTATTAATACCCCTTAATAAC--CTCAA---GAAAGACCAAACAAACC-AAT----  
 Dmve ACAACCATAAATAACCTTTAATGACCTAAAAC--CACATA--GAACAAACC-AAT----  
 Dmar CCAACCATTAATACCCCC--AATAACCTAAAG--CCAT--CTAAACAAACC-AAT----  
 Anka ACAATTATTAATACCCCT--AATAACCTAAA--TACAATT--AATCAAACC-AAT----  
 Moja AATACCCACTAACAACCTTAAGAC-----AA--GA--GTAAACCAAACC-AAT----  
 Hoja ACAACTATTAATACCCCTTAATGACCTTAAGA--TAA--GACAAACCAAACC-AAT----  
 Bede TCAAACATAAATAACCCCAAA--TACCCAAA-----CAAACAAACAAACC-AAT----  
 Bsp TCAAACATAAATAACCCCAAACACCCCA--A--ACCTAACAAA-C-AAATC-AAT----  
 Mysp CAA-ACATAAATAACCCCAATACCCCAAACA--AA--ACAAA-ACAAACC-AAT----  
 Osja CTAAACATAAAT--AACCCCTAATACCTA---AACACATAAAACAAACC-AAT----  
 Sgro CTAACTATAAATAAACCCCT--AATACCCCAAAC--CTAAAAT--AAACAAACC-AAT----  
 Pzpa CTAAATATACTCAACAATTAATTAACCTAAA--CCTC--TCAACAAACC-AAT----  
 Zeja TA-AATATTTTAAACAACAATAA--ACAAA--ACCC--AAACAAACC-AAT----  
 Znne ACCAATATTTTAA-ACAAT-AAATAACATAAA--AACCC--CAAACAAACC-AAT----  
 Zefa ACAAATATTTTAAACGATAAATAACCTAA-AA--ACTTTTTAA--CAAACC-AAT----  
 Acni TTTAATACTACTAATAATA-GATAACCTAAA--CCCCAC--AA-CAAACC-AAT----  
 Ncrh TTTAATACTACTAATAATA--GATAACCTAAA--ACCC-AT--AACAAACC-AAT----  
 Agca ACCCTTATTAATTAACCCCAATACACCAACA--AACCTG--CAACAAACC-AAT----  
 Hydy ATCAATCTAAATAACCCCG-AAGACACCACTA--TT--TAAATTACCAAACC-AAT----  
 Gsac TTCAATCTTGATAACCCCAAAGGACACTTAAC--TTAAATT--AAACAAACC-AAT----  
 Pevo ATAATTATTAATA-ACCC-AAATTTACTAAA--AACACA-C-AAACAAACC-AAT----  
 Hiku -AAACTAAAATAACCCCTAACACCATAAAAA--GT--AAT--ATTAAAC-AAT----  
 Inpa AACCA-CCATATTTAACCGAAAA-TAAACCAC--CTATATA-AAACAAACC-AAT----  
 Auch CCAA-TATTAATACCCCTAACATACTACAAA-----TCACTAGACCAAATC-AAT----  
 Fico TTCCATATAAATAACCCCTCATATCCTAA--A--TGACGACTAA-ACAAACC-AAT----  
 Macs ACAACTATGAATACCCCTCAGACACTAGAAC--CTAAAT--AAACAAACC-AAT----  
 Moal ACAATTAATAAT-AACCCACATTAATTACC--AAAAAC--CAATAAATC-AAT----  
 Syma ACCACCATAACTAAACCCAAATACA--CTAAC--CA-TAACAAAACAAAT-AAT----  
 Maf r CCACATTCATAACCCCTAAAACACCAAC--AC--C--ACCTCAAACAAACC-AAT----  
 Dcpe CCCACCATTAATA-CCCC-TCATCACCCACA--AATCAA--TAAACAAATC-AAT----  
 Dct i CTCAACATTAATACCCCT--CACACAGACA--AATTA-AC-AAACAAATC-AAT----  
 Hehi ACCACTATTTATAACCCCAA--TACACGAGTG--TTTTAATTAACAAACC-AAT----  
 Stam CTCAATATTAATAACCCCAATTTACTATTAA--CCTC--TAAACAAACC-AAT----  
 Hogi CCCCTATAAATAACCCCT-AACACACTAAGA--CTTAATT--AAGCAAACC-AAT----  
 Erzo ACCATTATTAATACCCCTAAGTACACTAGAG--TTTATTT--AAACAAACC-AAT----  
 Hxot ACCCCTGTTAATAACCCCTAAGTACCCAGTA--TTTATTTT-AAACAAACC-AAT----  
 Core AACCCCTGTTAATAACCCCT-AAATACCCAGT--ATTTAAATTAACAAACC-AAT----  
 Apve ATCCATGTCAATAACCCCTAAATACACCAGTA--TTTATTTTAAACAAACC-AAT----  
 Lat j ACTATCATAAATAACCCCAAAT-CACGCAT--TCTCCTA--AAACAAACC-AAT----  
 Laja GTCAGTGTTAATAACCCCA--AATGCACCAAC--ATCATTATTAACAAATC-AAT----



Syja CCTATTATTAATAACCCCC - AATACCCTATTA - - ACATGTAAAAAGT AA ACC - A TT - - -  
 Epme AACACCATAACTAACCCCAAAGA - CACGAATG - - TCTCCAC - - GAAC AA ACC - A TT - - -  
 Grse ATCACTATCAATACCCCCTAATACAATCCACC - - - CACAATTTAATC AA ATC - A TT - - -  
 Clja ATCACTATTTTTACCCAC - - - - AAATATCCTT - - AACCCCTATTAAT AA AAC - A TT - - -  
 Ogcy TACCCTATAAATAACCCC - - - TAAGACATTAC - - CCCTAAACAAAAT AA ACC - A TT - - -  
 Plna CCTTTTATTAATACCCCTAAAT - CATAACAAC - - CTAAACAAA - - C AA ACC - A TT - - -  
 Lema AACATCATTAAATACCCCCA - AAAACACTAACG - - TTTTTC - - - AAAC AA ACC - A TT - - -  
 Etzo ATCACCATTTATAACCCCT - - TAATACACTAAT - - GT - TATGTTTAAAC AA ACC - A TT - - -  
 Apse TCCATTGTAAATAACCCCT - AACCCACACCTTA - - TACCCCTAAGACC AA ACC - A TT - - -  
 Epde ATCACCATTAATATCCCCAAA - TACACCCCCC - - - CCAACA - AAC AA ACC - A TT - - -  
 Slja CA - ATATAAACTAAACCCTAATACCCCTTAAC - - CC - - - ACCAAAAC AA ACC - A TT - - -  
 Bsja ACCACTATCAATACCCCAAATACACCACCAG - - AC - TTAATAAAC AA ACC - A TT - - -  
 Ecna AATAT - - - TAATAAACCCCTAAAT - CACCATA - - - AA ACTAT - - AAAT AA AAC - A TT - - -  
 Cohi AATACTTCTACTAACCCCTAATACA - CTAAAA - - - A - T - ATTCAACT AA ACC - A TT - - -  
 Caar GTAACCATGAATA - - ACCCAAAGCACTAAA - - CTT - - ATTCAAAC AA AAC - A TT - - -  
 Came ACAAACATGAATAAACCCCAAACACTTCAAA - - - CTCAA - - TAAAC AA AGC - A TT - - -  
 Mema ACCCCCATTAATAACCCC - TAATGCACAAACT - - TCCACTT - - AACT AA AAC - A TT - - -  
 Lenu CCCCCTATAAATAACCCCTCACAGTCTTAA - C - - CAT - - AAAGATCT AA ACC - A TT - - -  
 Brja CAATATTAATACCCCGAATACCCCTTCCCC - - C - - - CCCCCAAC AA ACC - A TT - - -  
 Plma CCCCCTATATATAACCCCTAATACACCTCCTC - - - CTCTAAATAAAC AA ACC - A TT - - -  
 Emst C - CCTCATTAATAACCCCCA - AACACACTGACA - - ACTCAA - CCAAAC AA ACC - A TT - - -  
 Ptti CCC - CCATTAATAACCCCTAACACCATAGACT - - CACCCCTAA - - AC AA ATC - A TT - - -  
 Losu AAAAATTTATGTAACCATAAATACCACTACTA - - C - - - TATAAGAAC AA AAC - A TT - - -  
 Geoy TACCACATAAACTAAACCCCAAATTATCTG - - - AA ACTCCACAAAC AA ATC - A TT - - -  
 Dipi ATACCCATTAATAACCCCTAAAACACTA - - - - - CACCGCGCCAAAC AA ACC - A TT - - -  
 Pama ACCCCCATTAATAACCCCTAACATACTAACAT - - ATAACCA - - AA - C AA ATC - A TT - - -  
 Leob CCCACTATAACTAACCCCAAAGA - CACGC - - A - - CCCCCACAAA - AC AA ATC - A TT - - -  
 Neba ACCAC - ATTAATTAACCCCTAACACACTGTAA - - CCAACTC - - AAAC AA ATC - A TT - - -  
 Pdpi ATAAATTTCACTA - ACCCA - ACATGCATGTAA - - ATTCAACTTGACT AA ACC - A TT - - -  
 Nimi ATTCCCATCAATACCCCTAAAACA - CTCAA - - - ATTGTACTAAAC AA ACC - A TT - - -  
 Uptr ATCAT - ATTAATA - ACCCC - TAAGACACTTAA - - CACCAA - CTAAAC AA ATC - A TT - - -  
 Pesc ATAAATATTTATAACCCCA - AACACACCA - TA - - TCACAAAC - - AAC AA ATC - A TT - - -  
 Baar CCCACCATTAATAACCCCAAATGCA - - CTAAC - - - ATTAAACTGAAT AA ACC - A TT - - -  
 Moar - CACCCATTAATAACCCCAAACACA - - CTAAC - - - TAAACACTAAAC AA ACC - A TT - - -  
 Toja ATCAAATAAATAAACCCCA - AAGACCCAAA - - - - CAAGTCT - AAC AA ACC - A TT - - -  
 Chau AC - CATCTAAATACCCCCAATA - CACGCAAT - - ATATACC - - AAAC AA AAC - A TT - - -  
 Chse ACCAATATCCATACCCCA - AACATATTACCT - - GTTTTCCT - TAAC AA ACC - A TT - - -  
 Enar ATCCCTATTTATAACCCCT - AATACACCAACA - - TT - - CCCCTAAAC AA ACC - A TT - - -  
 Hpty ACCATTAATT - - AACCCCA - AATACACTAATA - - TACTATTA - - AAC AA ACC - A TT - - -  
 Nana - CCATATAAAATAACCCCT - AATTAACTACAC - - ACCC - - ACAAAC AA ATC - A TT - - -  
 Mcst T - CTATATTAATAACCCCA - AATTCACGAATG - - CCCCCA - CTTAAC AA ACC - A TT - - -  
 Rhox ATCAACATCCATACCCCAAAGACACTAA - CC - - CTAGAACAAA - AC AA ACC - A TT - - -  
 Opfa ATCAATATTTATAACCCCAAACACACGAATAC - - TTACGTT - - AAAC AA ACC - A TT - - -  
 Paar GCAAATATTTAT - - ACCCCTTCATATATCA - - - AATTTTTATTAAC AA ACC - A TT - - -  
 Gozo ACCATTATTTATAACCCCACATGCACAAATGT - - TTTTACA - - AAAC AA ATC - A TT - - -  
 Ackr AACCCGTGTTTATAACCCC - - - ACATCCCTTAG - - AACCCCTATAAAC AA ATC - A TT - - -  
 Elev AAAATA - TTA ACTACCACTAATACACT - - - - - TAATTTAAACAA - C AA ATC - A TT - - -  
 Trdu AACCCCTTATATATATCCC - CA - AACACACCA - - TTCTCTCAACAAC AA ACC - A TT - - -  
 Amoc TCCCCTATCAATACCCCAAAGATACTCTAAA - - CACAA - - - - AAC AA AAC - A TT - - -  
 Hame AGAACCCCTTCAATTAACCCACACACAG - TA - - AATTCACAAA - AC AA ACC - A TT - - -  
 Chso ACCAT - - - AACTAACCCACATGCA - - C - - TA - - AATAAAGTTAAAC AA ACC - A TT - - -  
 Lyto CCCCCTGTTAATAACCCCTAAG - TACTACTAGT - - - ATTTACATAAAC AA ACC - A TT - - -

Encr CCC-TTGTTAATAACCCCTAAGTACCCAGTA--TTTATATTAA-ACAAACC-AAT---  
 Bvar AACACCATTAAT-ACCCCTAAATACCCTAATG--TGCAGTT--AAATAAATC-AAT---  
 Noco ACCACCATTAATA-CCCC-AGATGCACAAC--CAAGA--TTAAACAAATC-AAT---  
 Chsp AACA-TATTAATAAACCA--GAATGTATCA-T--ACATAACTAAACTAAACC-AAT---  
 Arja CCC-CTGTTAATAACCCCTAACTACCCTAGTA--TTTATATTAA-ACAAACC-AAT---  
 Pase ATAGCTATAAATAAACCCCTAAGACATCAAAGG--ACTAACT--AAACAAAC-AAT---  
 Trel CAGAACAGGAATAACCCCAAAAACAGAAACAC--CTC--AATTAACAAACC-AAT---  
 Lifa AACAATATTTATAGCCCCACAAATACTTA-CA--TAAATTTAA-ATAAACC-AAT---  
 Acur ATCCACGTCAATAACCATTAATA-CCCTTAAA--ACCTCT--AAACAAAGC-AAT---  
 Ampe CCCATCAATAACCCCTCAC-ACACGACACACA--AG--TGA--AACAAATC-AAT---  
 Urja GCCAATTTACCTAACCCCA-AACATACCACAA--ACTAGA--AACTAAACC-AAT---  
 Enet AACAATACCCCTACCCCTGATGC--TTTATG--CAAT-TA--AACTAAACC-AAT---  
 Ptbr TTAATTAT--AAATATCT-TAGAATAACAT---AAAATATTAATCAAAAC-AAT---  
 Safa CCCGACATTAATAAACCCGAAGAATCGCA--C--AAC--AATATATTAAAAC-AAT---  
 Icae CCCAATATTTATAACCCCA-AACACACATCTC--CTC-CTATTAACAAACC-AAT---  
 Asmi TAC----TGAATAAAACAT-AATAAACTAATT--CTTATA--AAATAAATC-AAT---  
 Foal A--CTATTTTTAA-CCC-TATCATCAATTGAA--TAAGTGTATAAACAAATC-AAT---  
 Drze ATAACCATCAATA-CCCA-AAATAACCTATT--TACTAAA--AACTAAACC-AAT---  
 Rhas CCCAACATCAATAACCCC--TAACACCGAA--CCCAACACAAAACAAACC-AAT---  
 Elac GTCAACATAGACTAACCC-AAATACCCTCCC--ATCCA--TTAACCAAACC-AAT---  
 Kugu ACAAATTTAATAACCCCA-AAAACACTGACC--ACAACTTAAAA-CAAACC-AAT---  
 Plor ACCCCCATTAATAACCCCA-AACCCACTTTAA--CTAACCT--AAACAAATC-AAT---  
 Sgun ACCCCCATTCATACCCCAAA--TACACTAAT--TTACCTCAAAACAAACC-AAT---  
 Zaco AACCCATCAATAACCCCAAA--TACACCAAC--ACCTCCTAAAACAAACC-AAT---  
 Zbfl ACCCATATTAATAACCCCA--TACATTCTGAT--GTTAC-GTTAAACAAACC-AAT---  
 Spba TCAACCATTAATT-AGCCCTAATCCACTATA-AAATACCCTAAGCTAAACC-AAT---  
 Game CCCACTATAAATAACCCCAAAACGCAGCCTCC--CCGCATT--AAACAAACC-AAT---  
 Thth CTCAATATAAATAACCCCAAA--CACACTACT--CCTCCTATAAACAAACC-AAT---  
 Xigl ATCACTATTAATAACCCCGAA-AACACACTAA--ATTTATT-TACTAAACC-AAT---  
 Hyja CCCAATATTAATAACCCCAAAAGACC-CCCC--CCCCGCTTAATCAAACC-AAT---  
 Psan CCCAATATTAATAACCCCT-AATACACCACCT--CCCTAT-TTAACCAAACC-AAT---  
 Cupa CCCAATATTCATA-AACCC-AAATATACGCCT--CCCCAA-TTAACAAACC-AAT---  
 Mpch AACACTATTAATAACCCCT-CAAACCCTATAA--AT--ATAA--AACAAACC-AAT---  
 Char ATCACCATAAATAACCCCAAAATACA-CAACCC--AATACACCAACTAAATC-AAT---  
 Pser TCA-ACATAAATAACCCCAAAATACACAACCCC--CA--TCAA-CCAAACC-AAT---  
 Prol ACCCATATAAATAACCCCT-AAAGCAGTAAC--ACCCACGT-AGCCAAACC-AAT---  
 Plbi CCATTCATA--ACCCCT--AAAGCAGGAAA--CACCCACGTAGCTAAACC-AAT---  
 Calu ACCCCCTTCAATAAACCCCAAAACACC--CACCA--A--TACACAAGTAAAAC-AAT---  
 Papa GACCTTATAAATAAACCC- AACACACTCAAC--CAA--CAAACAAAAC-AAT---  
 Suf r CCAAACATAAATA-ACCC-ATA-AACACTAC--AAAAT--AAAAACAAACC-AAT---  
 Stci CTAAACATTAATAAACCCCT-TATTTACTCACA--ACA--CTAAACAAACC-AAT---  
 Taru ACCACTATAAATAACCCCTAAGATA-CTTAAC--TA--AACAAAACAAATC-AAT---  
 Rala ACCCCTATTTATAACCCCTAATAGCACTAAC--CCC--T-TAAACAAACC-AAT---

\*\*  
 \*\*\*

|      | 2       | 3   | 3'      | 2' | !       | HVR | !      |    |                   |       |             |          |           |           |
|------|---------|-----|---------|----|---------|-----|--------|----|-------------------|-------|-------------|----------|-----------|-----------|
| Scca | CTTCACC | CT  | TAAGTA  | -- | TGGGCGA | CA  | GAAACA | AG | GACCTC            | ----- | AGCGC       | --       | AATAGCTTA |           |
| Muma | -TTAACC | TT  | CTAGTA  | -- | TGGGTGA | CA  | GAAACA | AT | AACTC             | ----- | AAGAGC      | --       | AATAGCTTA |           |
| Erca | T-GTTAA | CT  | CAAGTA  | -- | TAGGAGA | TA  | GAAAA  | AG | ACTA              | ----- | ATAGAGC     | --       | AATAGTTA- |           |
| Pose | -TGTCAA | CT  | TTAGTA  | -- | TAGGCGA | TA  | GAAAA  | AG | ATT               | ----- | TACAGAGC    | --       | TATAGCAAT |           |
| Actr | TAAT-AC | CCC | CAGTA   | -- | TAGGCGA | TA  | GAAAA  | GC | ACA               | ----- | AAGCAGCGC   | --       | AATAGAGAA |           |
| Scal | TAAT-CC | CC  | CTAGTA  | -- | TAGGCGA | TA  | GAAAA  | GC | ACA               | ----- | AAGCAGCGC   | --       | AATAGAAAA |           |
| Posp | -TAATTT | CCC | CAGTA   | -- | TAGGCGA | TA  | GAAAA  | GC | ACAA              | ----- | AACAGCGC    | --       | AATAGAGAA |           |
| Atsp | T--CTAC | CCC | CAGTA   | -- | TAGGCGA | TA  | GAAAA  | GC | AAAAT             | ----- | TTGAGC      | --       | AATAGAAAA |           |
| Leoc | T-GTAC- | CCC | CAGTA   | -- | TAGGCGA | TA  | GAAAA  | GC | AAAA              | ----- | TTTTGAGC    | --       | AATAGAAAA |           |
| Amca | -TTTTCT | CC  | CTAGTA  | -- | TAGGCGA | TA  | GAAAA  | GC | ATC               | ----- | CTTTAAAGC   | --       | TATAGAAAA |           |
| Osbi | T-TTCCT | CC  | CTAGTA  | -- | TTGGAGA | AA  | GAAAA  | GC | ATACT             | ----- | CTTGAGC     | --       | AATAG-AAA |           |
| Pabu | C-TTCCA | TC  | TTAGTA  | -- | TAGGAGA | TA  | GAAAA  | GA | AAAT              | ----- | TTTCGAGC    | --       | CACAAAAAT |           |
| Hial | T-TCCA  | CC  | TTAGTA  | -- | TGGGCGA | CA  | GAAAA  | GC | AAAT              | ----- | TAGAGC      | --       | TATAGAGAA |           |
| Elha | CTCC-CC | CC  | TTAGTA  | -- | TGGGCGA | CA  | GAAAA  | GC | AAAA              | ----- | CCAGAGC     | --       | AATAGAAAA |           |
| Mlcy | T-TCCC  | TT  | CTAGTA  | -- | TAGGAGA | CA  | GAAAA  | AA | GAG               | ----- | ACCAGAGC    | --       | AATAGAAAA |           |
| Algl | TTTC-CT | TC  | TTAGTA  | -- | TAGGCGA | TA  | GAAAA  | GC | AGAAT             | ----- | TTGAGC      | --       | AATAGAAGA |           |
| Ptgi | T-TTCCA | CCC | CAGTA   | -- | TAGGCGA | TA  | GAAAA  | GC | AAAA              | ----- | CTTCAAGC    | --       | GATAGAAA- |           |
| Alaf | TAAC-CT | CCC | CAGTA   | -- | TAGGCGA | TA  | GAAAA  | GC | AAA               | ----- | AATTTAAGC   | --       | AATAGAAAA |           |
| Nock | TTAC-CT | CCC | CAGTA   | -- | TAGGCGA | TA  | GAAAA  | GC | AAA               | ----- | ATTTGAGC    | --       | GATAGAAAA |           |
| Anja | C-TTCCC | CC  | TAAGTA  | -- | TAGGTGA | TA  | GAAAA  | GC | ACAAA             | ----- | ACGCGC      | --       | AATAGAAAA |           |
| Gyki | C-TACCC | CC  | CTAGTA  | -- | TAGGTGA | TA  | GAAAA  | GC | TC                | ----- | CCCAGAGC    | --       | AATAGAAAA |           |
| Syka | -CTTCCA | CC  | TTAGTA  | -- | AGGGAGA | CA  | GAAAA  | GC | AAATC             | ----  | TCTAGAGC    | --       | CATAGAAAA |           |
| Opma | TTTC-CA | CC  | TAAGTA  | -- | TAGGCGA | TA  | GAAAA  | GC | ACA               | ---   | CACCTTGAAGC | --       | TATAGAAAA |           |
| Comy | C-TCCCA | CC  | TTAGTA  | -- | TGGGCGA | CA  | GAAAA  | GC | ATA               | ----- | TTATAGAGC   | --       | CATAGAAAA |           |
| Sasp | C-TTCCC | CC  | CTAGTA  | -- | TGGGCGA | CA  | GAAAA  | GC | ATCA              | ----- | AGGAGC      | --       | AATAGAAA- |           |
| Eupe | CTCC-CA | CC  | TAAGTA  | -- | TAGGCGA | TA  | GAAAA  | GC | AAC               | ----- | TAAGAGC     | --       | GATAAAGAA |           |
| Enja | T-GACCT | TC  | CCAGTA  | -- | TGGGCGA | CA  | GAAAA  | GA | ATTC              | ----  | CCAGAAGC    | --       | AATAGAAA- |           |
| Same | C-GACCA | CCC | CAGTACC | -- | GGGCGA  | CA  | GAAAA  | GC | AAAA              | ----- | ATGACGC     | --       | TATAGACAA |           |
| Chch | -TTACCG | CC  | TAAGTA  | -- | CGGTGA  | CG  | GAAAA  | GC | CAACTACACAAATAAGC | --    | AATAGAAAT   |          |           |           |
| Grgr | TTAC-CA | CC  | TGAGTA  | -- | TGGGCGA | CA  | GAAAA  | GC | TC                | ----  | ACCAAAAAGC  | --       | CATAGAAAA |           |
| Caau | C-TTTTA | CC  | TGAGTA  | -- | TGGGAGA | CA  | GAAAA  | GC | TTC               | ----- | CACAAAGC    | --       | AATAGAAAC |           |
| Cyca | T-TTTTA | CC  | TGAGTA  | -- | TGGGAGA | CA  | GAAAA  | GC | TTCC              | ----- | ACAAAGC     | --       | GATAGAAA- |           |
| Dare | A-TATTA | TC  | CTAGTA  | -- | TGGGAGA | CA  | GAAAA  | GA | TA                | ---   | AAATACTAAGC | --       | AATAGAGAA |           |
| Cost | T-TTCCA | CC  | TTAGTA  | -- | CGGCGA  | CC  | AAAAA  | GC | TTCC              | ----- | GTGAGC      | --       | AATAGAAA- |           |
| Leec | TTTC-CA | CC  | TTAGTA  | -- | CGGCGA  | CA  | GAAAA  | GC | TA                | ----- | AACTTAAGC   | --       | AATAAAGAG |           |
| CrIa | TTTC-CA | CC  | TTAGTA  | -- | CGGCGA  | CC  | GAAAA  | GC | AT                | ----  | CCGATTAAGC  | --       | GATAGAAAA |           |
| Clmc | CTCC-TG | CC  | TTAGTA  | -- | CGGCGA  | CA  | GAAAA  | GC | CAA               | ---   | TAAACCAAAGC | --       | AATAGAGAA |           |
| Phin | C-TCCCA | CC  | TTAGTA  | -- | CGGCGA  | CC  | AAAAA  | GC | CACA              | -     | TCTTCTTAAGC | --       | AATAGTAAA |           |
| Icpu | CTAC-CG | CC  | TTAGTA  | -- | TGTGTGA | CA  | GAAAG  | GC | CA                | ---   | C--         | CACAAAGC | --        | AATAATAAA |
| Psto | TTAC-CG | CC  | CAAGTA  | -- | TGTGAGA | CA  | GAAAA  | GC | CACA              | ----- | CTAAAGC     | --       | TATAGAAAA |           |
| Cora | TTTC-CG | TC  | CAAGTA  | -- | TATGAGA | TA  | AAAAA  | GA | CACA              | ----- | AAAAGC      | --       | AATAGATAA |           |
| Eisp | T-TACTG | CC  | TTAGTA  | -- | CGGCGA  | CC  | GAAAA  | GC | CACC              | -     | ACATTATAAGC | --       | GATAGAAA- |           |
| Apal | -TTCTG  | CC  | TTAGTA  | -- | TGGGCGA | CA  | GAAAA  | GC | CACC              | -     | A-CCCAAAAGC | --       | AATAGAAAC |           |
| EsLu | TTTC-CT | CC  | TTAGTA  | -- | TAGGCGA | TA  | GAAAA  | GC | AAATA             | ----- | CCGAGC      | --       | AATAGAAAA |           |
| Dape | T-TTCCT | CC  | TTAGTA  | -- | TAGGCGA | TA  | GAAAA  | GC | ATCC              | ----- | TCTGAGC     | --       | AATAGAAAA |           |
| Glse | T-TTCCC | CC  | TTAGTA  | -- | CGGCGA  | CA  | GAAAA  | GC | GAATA             | ----- | CGAGC       | --       | AATAGAAAA |           |
| Naar | T-TTCCC | CC  | TTAGTA  | -- | CGGCGA  | CA  | GAAAA  | GC | GACC              | ----- | CTGAGC      | --       | AACAGAGAA |           |
| Baoc | TTTC-CC | CC  | TTAGTA  | -- | TGGGCGA | CA  | GAAAA  | GC | GAC               | ----- | CC-TGAGC    | --       | AACAGAGAA |           |
| Opso | T-TTCCC | CC  | TTAGTA  | -- | CGGCGA  | CA  | GAAAA  | GC | GACC              | -     | C-----      | TGAGC    | --        | AACAGAGA- |
| Alte | TTTC-CA | CC  | TTAGTA  | -- | TGGGAGA | CA  | GAAAA  | GC | AAC               | ----- | CACAAAGC    | --       | AATAGAGAA |           |
| Plap | T-TTCCG | CC  | CTAGTA  | -- | TGGGAGA | CA  | GAAAG  | GC | AACC              | ----- | ACAAAGC     | --       | AATAGAGA- |           |

Plal T-TTCCA**CC**TGAGTA--**CGGGCGA****CC**GAAAG**CC**AGCA-----AATTGAGC--GACAGAGA-  
 Sami T-TTCCA**CC**TTAGTA--**CGGGCGA****CC**GAAAA**CC**GCA-----ATTTGAGC--CATAGAAAA  
 Rere T-TTCCA**CC**TTAGTA--**TGGGAGA****CA**GAAAG**CC**ACATT-----TGAGC--AATAGAGAA  
 Gama T-TTCCA**CC**TGAGTA--**AGGGAGA****CA**GAAAA**CC**ACC---TT---GAAGC--AACAGAGA-  
 Onmy T-TTCCA**CC**TTAGTA--**GGGGCGA****CC**GAAAA**CC**AGAT--AA---TTGAGC--AACAGAAAA  
 Sasa T-TTCCA**CC**TTAGTA--**CGGGCGA****CC**GAAAA**CC**AAACAAT---TTGAGC--AACAG-AAA  
 Cola TTTC-CC**CC**TTAGTA--**TGGGCGA****CA**GAAAA**CC**GAA----TAAT-TGAGC--AACAGAGAA  
 Dita -TTTCCA**TC**CTAGTA--**CGGGAGA****CC**GAAAG**CA**GCA-----CTTTTGAGC--GACAGAGAT  
 Gogr TTTC-CA**CT**CTAGTA--**TGGGAGA****CA**AAAAG**AA**TT---AG-CCCTGAGC--AACAGAGAG  
 Chsl T-TTCCT**CC**CTAGTA--**CGGGCGA****CA**GAAAA**CA**AGAT--AT---TGAGC--TATAGTAA-  
 Atja T-TTCCC**CC**TAAGTA--**TGGGAGA****CA**GAAAA**CC**AAAA---CCTTAGAGC--AATAGAAAA  
 Iido TTTC-CC**CC**CAAGTA--**TGGGAGA****CA**GAAAA**CC**AA---AACT---AGAGC--AATAGAAAA  
 Auja TTTC-CC**CC**TTAGTA--**CGGGCGA****CA**GAAAA**CC**GAA---CGCACGGCGC--AACAGACAA  
 Chag GTTTATT**CC**CAAGTA--**CGGGCGA****CC**GAAAA**CC**AAAACGA---CGGAGC--AATAGAAAC  
 Hami C-TTCCT**CC**TAAGTA--**TGGGCGA****CA**GAAAA**CC**ACA--GT---AGGAGC--TACAGATAA  
 Saun C-TTCCT**CC**CCAGTA--**CGGGCGA****CA**GAAAA**CC**ATAGCA-----GGAGC--TACAGACAA  
 Nema T-TTCCC**CC**CTAGTAC-**TGGGCGA****TA**GAAAA**CC**GCCT-----ACGGAGC--TACAGAGA-  
 Disp TTAC-CT**CC**CCAGTACC**CGGGCGA****CA**GAAAA**CC**AAATCC-----CGGAGC--AATAGAAAA  
 Myaf TTAC-CT**CC**TCAGTA--**CGGGCGA****CA**GAAT**CC**AAA---T-CA-AGAGC--AATAGAGAA  
 Lagu TTTC-CC**CT**TAAGTA--**TGGGAGA****CA**GAAAT**CC**GA-----ACAGAAGC--AATAGAGAC  
 Trtr C-TCCCA**CT**TTAGTA--**TGGGCGA****TA**GAAAC**CC**GTC-----ATTGGAGC--CATAGACTA  
 Zucr T-TCCCG**CC**CTAGTA--**TAGGTGA****CA**GAAAT**CC**AA-----ACAGGAGC--AATAGAACT  
 Pxja T-TTCCA**CC**CTAGTA--**TGGGCGA****CA**GAAAA**CC**AAC-----ACGGAGC--AACAGAAAA  
 Pxlo T-TTCCA**CC**CTAGTA--**TGGGCGA****CA**GAAAA**CC**AACA--C---GGAGC--AACAGAAA-  
 Pctr -TTTCCA**CC**CCAGTA--**TGGGAGA****CA**GAAAA**CC**AA-C--A-A---GGAGC--AATAGACAG  
 Apsa C-TACCA**CC**ACAGTA--**TGGGAGA****CA**AAAA**CC**AC-----CTCGGAGC--AATAGACAA  
 Cabe C-TCCCC**CC**TAAGTA--**TAGGAGA****TA**GAAAA**CC**ACAC--G---ATGAGC--AATAGAGAA  
 Bzze T-TTCCG**CC**CGAGTA--**TAGGAGA****TA**GAAAA**CC**ACCA--GA---CGGAGC--AATAGATAA  
 Siim T-TTCCC**CC**CGAGTA--**CAGGAGA****TC**GAAAG**CC**GACA--CA--GAGAAGC--TACAGATAA  
 Ctru TTTC-CA**CC**CCAGTA--**CGGGCGA****CA**GAAC**CC**ACC-----TGCGAGAGC--GATAGACAA  
 Dpbr -CTCCCA**CC**CTAGTA--**TGGGCGA****CA**GAAAA**CC**AT-----CTAGAGAGC--AATAGAGAA  
 Caki TATA-AA**CC**CCAGTA--**TGAGAGA****CA**AAAA**CC**AT-----ATT--AGAGC--TATAGACAT  
 Phja TTAA-AC**CC**TTAGTA--**TGGGCGA****CA**GAAAA**CC**AA---A---AAAGAGC--TATAGATAA  
 Brsp C-TATTT**CC**CTAGTA--**TGGGCGA****CA**GAAAA**CC**ACCC-----CGAGAGC--TATAGACAA  
 Gamo TTAC-CC**CC**TGAGTA--**CGGGCGA****CA**GAAAA**CC**AGA---AA---AGAGC--AACAGACAA  
 Lolo T-TACCC**CC**TAAGTA--**TGGGCGA****CA**AAAA**CC**AAAA-----AAGAGC--AACAGATA-  
 Batr C--CTCA**CC**ATAGTA--**TGGCCGA****TA**GAAAA**CC**TTA-----AATGAAC--TATACAACA  
 Prmy TTAC-CG**CT**CTAGTA--**TGGACGA****TA**GAAAA**CC**GCC-----TATGAAC--TATAGAAAA  
 Loli T-TTCCC**CC**TTAGTA--**CGGGCGA****CA**GAAAA**CC**ACCTT-----CGAGC--GATAGACTA  
 Loam T-TTCCC**CC**CTAGTA--**TGGGCGA****CA**GAAAA**CC**ACCT--T---AGTGAGC--AATAGAAA-  
 Chab T-TTCCC**CC**CTAGTA--**TAGGCGA****TA**GAAAA**CC**GCC-----TTAGAGC--GATAGATAT  
 Chto TTTC-CC**CC**CTAGTA--**TAGGCGA****TA**GAAAA**CC**GC---C--TTAG-AGC--GATAGATAT  
 Majo TTAC-CC**CC**TTAGTA--**TGGGCGA****CA**GAAAA**CC**AAT-----AAGGAGC--AATAGAGAA  
 Hlst TTTC-CG**CC**CTAGTA--**CGGGAGA****CA**GAAAA**CC**AC---TAAT--TGAGC--AATAGAGAA  
 Clpe -TTTCT**CC**TTAGTA--**TAGGCGA****TA**GAAAA**CC**ATAC-----CGGAGC--GATAGAGAC  
 Mlmr C-TCCCC**CT**TTAGTA--**TAGGCGA****TA**GAACA**CC**ACAT-----A-AGAGC--AATAGAAGA  
 Crcr T-TACCC**CC**TTAGTA--**TGAGCGA****CA**GAAAT**CA**AATCAC-----CGGAGC--AATAG-AAA  
 Muce T-TACCC**CC**TTAGTA--**TGAGCGA****CA**GAAAT**CA**AATC--ACC---AGAGC--AATAGAAA-  
 Bege TTAC-CG**CT**TTAGTA--**CAGGAGA****TC**AAAA**CC**AAC---TA---GGCGC--AATAGAAAA  
 Mela T-TTCCA**CT**TTAGTA--**TAGGTGA****TA**GAAAA**CC**ACATT-----CGACGC--AATAG-AGA  
 Hats C-TTCCC**CC**TAAGTA--**TAGGAGA****TA**GAAAA**CC**AACC-----AGGCGC--GATAGAAAA  
 Orla T-TTCCT**CC**ATAGTA--**TGGGAGA****CA**GAAAG**CC**ACT-----AAGGAGC--TATAGACAA

Cosa T-TTCCC**TT**ATAGTA--**TATGAGA****TAGAAA****TA**AGCT-----T-TGGAGT--AACAGAAC  
 Exsp -TTTCCC**CT**CTAGTA--**TGGGAGA****CAGAAAG****AG**AAC-----AA--GGCGC--AATAGAGAA  
 Depa T-TTCCT**TT**TTAGTA--**TGAGAGA****CAGAAA****AT**ATA-----ACAGAGC--TATAGATAC  
 Rima CTAC-CC**CC**TAAGTA--**TGGGCGA****CAGAAA****GC**AC-----CT-TAAAAGC--TATAGAAAA  
 Fuol TTTC-CT**CC**CTAGTA--**CGTGCGA****CAGAACA****GC**AAA---TACGCGAGCGC--TATAGATAA  
 Gmaf TTTC-CT**CC**TTAGTA--**AAGGCGA****TAGAAA****GC**AA---AACACGGAGC--CATAGAAGC  
 Xeei T-TTCCT**CC**TAAGTA--**AAAGTGA****CAGAAA****GC**ATCA--ACTATTAGAGC--CATAGAAAA  
 Pros TTCC-CT**TC**CTAGTA--**CGGGAGA****CAGAAA****GAG**A---A--TCAGGAGC--AATAGAAAC  
 Scmi TTCC-CT**TC**TTAGTA--**TGGGAGA****CAGAAA****G**AAA-----TCAGGAGC--AATAGAAAT  
 Rolo TTTC-CC**TC**TTAGTA--**CGGGCGA****CCGAAA****G**AGAC-----CCAGGAGC--AATAGAAAT  
 Cere T-TACCC**TC**TTAGTA--**CGGGCGA****CCGAA**CG**G**AGACC--A---GCGAGC--AATAGAATT  
 Daga TT-TCCC**TC**CTAGTA--**CGGGCGA****CCGAAA****G**AGACC-----CAGCGAGC--GATAGATAT  
 Anco T-TTCCC**CC**TTAGTA--**TGGGCGA****CAGAAA****GC**ATCCA-----GGAGC--AACAGAAAA  
 Dmve T-TTCCC**CC**TTAGTA--**TGGGCGA****CAGAAA****GC**ACCC-----A--GGAGC--AACAGAGAA  
 Dmar TTTC-CC**CC**TTAGTA--**TGGGCGA****CAGAAA****GC**ACCC---A---GGAGC--AACAGAAAA  
 Anka TTTC-CC**CC**TTAGTA--**TGGGCGA****CAGAAA****GC**ATC-----AAGGAGC--AATAGAAAA  
 Moja -TTTCCC**CC**TTAGTA--**TGGGCGA****CAGAAA****GC**ACCC-----AGGAGC--AATAGAAAA  
 Hoja -TTTCCC**CC**TTAGTA--**TGGGCGA****CAGAAA****GC**AC-----CTATGGAGC--AACAGAAAA  
 Bede T-TCCCC**TC**TTAGTA--**TGGGAGA****CAGAAA****G**AGAA-----TTAGGAGC--AATAGAAA-  
 Bosp TT-TCCC**TC**TTAGTA--**CGGGAGA****CAGAAA****G**AGAA-----ATTAGGAGC--AATAGAAAC  
 Mysp -TTCCCA**TC**CTAGTA--**TGAGCGA****CAGAAA****G**ACT-----CGCGAGC--AATAGAGAC  
 Osja T-TCCCA**TC**CTAGTA--**TGAGCGA****CAGAAA****G**AGACA--CG---CGAGC--GATAGAAA-  
 Sgro T-TTCCG**TC**CTAGTA--**TGTGCGA****CAGAAA****G**AAC-----TATGCGAGC--GATAGAGAC  
 Pzpa T-TTCCC**CC**TAAGTAA-**CAGGCGA****TAGAAA****GC**GA---CCT---GGAGC--AACAGACGA  
 Zeja TTTC-CC**CC**TAAGTAA**TAGGCGA****TAGAAA****GC**GAC-----CATTGAGC--AATAGATGA  
 Znne TT-TT-**ACC**CTAGTA--**AAGGAGA****TAGAAA****GC**AAA---C--A--GGAGC--AATAGATAA  
 Zefa TT-TT-**ACC**TTAGTA--**AAGGCGA****TAGAAA****GC**AC-----CCACGGAGC--AACAGATAA  
 Acni TTTC-CC**CC**CAAGTA--**AAGGCGA****TAGAAA****GC**GAC-----CAGGAGC--TATAGACAA  
 Ncrh TTTC-CC**CC**TAAGTA--**AAGGCGA****TAGAAA****GC**GACC-----AGGAGC--TATAGACAA  
 Agca TTTC-CA**CC**CTAGTA--**TAGGCGA****TAGAAA****GC**AAG---CCCAGGAGC--AATAGAGAA  
 Hydy TTCC-CT**CC**TTAGTA--**TAGGCGA****TAGAAA****GC**AC-----TCA-CGGCGC--AATAGAGAA  
 Gsac TTTC-CA**CC**TTAGTA--**TAGGCGA****TAGAAA****GC**A-----CATATGGCGC--TATAGAGAA  
 Pevo T-TTT-**ACC**CAAGTA--**TCGGCGA****GAGAA****GC**AC-----CAACAGCGC--TATAGAAAC  
 Hiku -TTATA**ACC**CTAGTA--**AGGGAGA****CTGAAA****GC**AAA-----AATGAAGC--TACAAAAC  
 Inpa CTCACAC**TC**TTAGTA--**AAGGCGA****TAGAAA****G**AGAA---CA---CGGAGC--AATAGACAA  
 Auch T-TTCCA**CC**TAAGTA--**TGAGCGA****CAGAAA****GC**ACAC--ATTTTTAGAGC--AATAGAGA-  
 Fico T-TACCC**CC**CTAGTA--**TGGGCGA****CAGAAA****GC**AC-----AAGGGAGC--TATAGAGAA  
 Macs T-TTCCC**CC**CAAGTA--**CGGGCGA****CAGAAA****GC**GACC--AA---TTGAGC--GATAGAGAA  
 Moal CTAC-CC**AT**TTAGTA--**TGTGCGA****CAGAAA****AC**AAA-----TTTAAGC--TATAGAAAA  
 Syma T--AACC**TC**CAAGTA--**TGGAAGA****CAGAAA****G**ACTATA-----TACGC--AATAG-AGA  
 Maf r -TTAT-**ACC**CTAGTA--**TGGGCGA****CAGAAA****GC**AAAT--A-T---GGAGC--AATAGAATA  
 Dcpe TTTC-CA**CC**TAAGTA--**TGGGCGA****CAGAAA****GC**AA---C--TTCGGAGC--GATAGAGAA  
 Dct i TTTC-CA**CC**TAAGTA--**TGGGCGA****CAGAAA****GC**A-----ACTTTGGAGC--AATAGAGAA  
 Hehi T-TTCCC**CT**TTAGTA--**TGGGCGA****CAGAAA****AC**GACC-----CAGGAGC--AATAGAGA-  
 Stam T-TTCCC**CC**CAAGTA--**TGGGCGA****CAGAAA****GC**GC-----CACAGGAGC--GATAGAGAA  
 Hogi TTTC-CC**CC**CTAGTA--**TGGGAGA****CAGAAA****GC**AAC-----AAAGAAGC--AATAGAAAA  
 Erzo TTTT-CC**CC**TAAGTA--**TAGGCGA****TAGAAA****GC**GCT-----TA-CGGCGC--AATAGAGAA  
 Hxot TTTC-CC**CC**TTAGTA--**TAGGCGA****TAGAAA****GC**GCC-----CA-CGGCGC--AATAGAGAA  
 Core TTTC-CC**CC**TTAGTA--**TAGGCGA****TAGAAA****GC**AC---A--AGAGCGC--AATAGAGAA  
 Apve T-TCCCC**CC**TTAGTA--**TAGGCGA****TAGAAA****GC**G-----CCCCGGCGC--AATAGAAAA  
 Lat j TTTATCA**CC**CTAGTA--**TGGGCGA****CAGAAA****GC**ACTC--TG---TGGAGC--GATAGAAAA  
 Laja TTTC-CC**CC**TTAGTA--**TGGGCGA****CAGAAA****GC**GA-----CCAGGAGC--AATAGAGAA

Syja TTTC-CC**CC**TTAGTA--TGAACGA**CA**AAAA**CC**AC-----CC--TAGAGC--AACAGAGAA  
 Epme TTT-CCC**CT**TTAGTA--TGGGCGA**CA**GAAA**AG**AA----CA---CGGAGC--GATAGAGAA  
 Grse T-TTCCT**CC**CTAGTA--TGGGCGA**CA**GAAA**GA**ACATA-----CGGAGC--AATAG-ACA  
 Clja CTCC-CC**CC**TTAGTA--TAGGCGA**TA**GAAA**CC**AA----A---TAAGAGC--AACAGAGAA  
 Ogcy TTTC-CA**CC**CAAGTA--TGGGAGA**CA**GAAA**CC**AA----AA-TTGAAGC--AATAGAAAA  
 Plna TT-TCAC**CT**TAAGTA--TAGGCGA**TA**GAAA**AC**ATC-----TAGGAGC--GATAGAAAA  
 Lema TT-TCCA**CC**TAAGTA--TGGGCGA**CA**GAAA**CC**AACT-----A-CGGCGC--AATAGATAA  
 Etzo TTTC-CC**CC**TGAGTA--TGTGCGA**CA**GAAA**CC**GC---C--CGTGGAGC--AATAGAGAA  
 Apse TTTC-CC**CC**TAAGTA--TGGGCGA**CA**GAAA**CC**AT---AAGTC-GGAGC--AACAGAAAC  
 Epde T-TTCCC**CC**CTAGTA--TGGGCGA**CA**GAAA**CC**G----CCCGA-GGAGC--AATAGAGAA  
 Slja -TTTCCC**CC**TTAGTA--TGGGCGA**CA**GAAA**CC**AACT-----CGAGGAGC--TATAGAGAA  
 Bsja TTCCC**CT**CTAGTA--TAGGTGA**TA**GAAA**GA**GAC-----ACAAGGCGC--AACAGAGAA  
 Ecna T-TGCAC**CC**TTAGTA--TAGGAGA**TA**GAAA**CC**AATA--TA---CGGAGC--AATAGAAAA  
 Cohi C-ATCTT**CC**CTAGTA--TAGGCGA**TA**GAAA**CC**AATA-----AAGAGC--AACAGATAT  
 Caar -TTTCT**CC**CTAGTA--TGGGCGA**CA**GAAA**CC**A---C-CTTCGGGCGC--AATAGAACA  
 Came T-TTCCC**CC**TAAGTA--TGGGAGA**CA**GAAA**CC**AC---CACAAGGCGC--AATAGAAAA  
 Mema C-TACCC**CC**TCAGTA--CGGGCGA**CC**GAAA**CC**GCCC--CG---TGGAGC--AATAGATAT  
 Lenu -CTTCCC**CC**TTAGTA--TAGGAGA**TA**GAAA**CC**A---A--CAGTGGCGC--CATAAAAAA  
 Brja -TTTCCC**CC**TTAGTA--TAGGAGA**CA**GAAA**CC**AACA--A-C---AGAGC--AATAGAGAA  
 Plma T-TACCC**CC**TCAGTA--TGGGCGA**CA**GAAA**CC**AA---CAGTTG-GAGC--AATAGAGAA  
 Emst TTTC-CC**CC**TAAGTA--TAGGCGA**TA**GAAA**CC**GAC---CAC---GGAGC--AATAGAGAA  
 Ptti -TTTCT**CC**CTAGTA--CAGGCGA**TA**GAAA**CC**AAC-----TGT-GGAGC--TACAGAAAA  
 Losu -TTTCCC**CC**CTAGTA--CGGGAGA**CA**GAAA**CC**AACA--A-T--TGAAGC--CATAGACAA  
 Geoy T-TTCCT**CC**CAAGTA--CGGGCGA**CC**AAAA**CC**AAGC--CT---AAAGC--AATAGAAA-  
 Dipi T-TTCCC**CC**TTAGTA--TAGGCGA**TA**GAAA**CC**AACT--CCT---GAGC--AATAGAAA-  
 Pama T-TTCCC**CC**CAAGTA--TAGAGCA**CA**GAAA**CC**AACT-----ACGGAGC--AACAGAGAA  
 Leob T-TTCCC**CC**TAAGTA--TAGGCGA**TA**GAAA**CC**AA-----TTAGGAGC--GATAGAAAA  
 Neba TTCC-CT**CT**CTAGTA--TGTGCGA**CA**GAAA**AC**AGC---AA-T-AGCGC--TATAGAAAA  
 Pdpi CT-TT-T**CC**CTAGTA--TAGGCGA**TA**GAAA**CC**AA---C-CCAGGGAGC--GATAGAGAA  
 Nimi T-TTCCT**CC**CAAGTA--CGGGCGA**CA**GAAA**CC**AACCG-----TCGCGC--CATAG-AGA  
 Uptr TTAC-CC**CC**TTAGTA--TGGGCGA**CA**GAAA**CC**AA---CAA---GGAGC--AATAGAGAA  
 Pesc T-TCCCC**CC**CTAGTA--TGGGCGA**CA**GAAA**CC**AG---ACCAG--GAGC--TATAGAGAA  
 Baar T-TTCCC**CC**TTAGTA--TGGGAGA**CA**GAAA**CC**GCCA-----AGGAGC--AATAGAGAA  
 Moar TT-TCCC**CC**TGAGTA--TGGGCGA**CA**GAAA**CC**GACT-----GT-GGAGC--AACAGAGAA  
 Toja T-TTCCT**CC**CTAGTA--TAGGCGA**TA**GAAA**CC**AC-----TTAAGGGAGC--TATAGAAAA  
 Chau T-TTCCC**CT**TTAGTA--TAGGCGA**TA**GAAA**AC**TAC--CC---CGGAAC--GACAGAAAA  
 Chse TTTC-CC**CT**TTAGTA--TAGGCGA**TA**GAAA**AC**ATC---TCCG---GAGC--AATAGAGAA  
 Enar TTTC-CC**CC**TGAGTA--TGGGCGA**CA**GAAA**CC**AA---CTG-TGGCGC--TATAGAGAA  
 Hpty T-TTCCC**CC**TTAGTA--CGGGCGA**CA**GAAA**CC**GC---CCGAG--GAGC--AATAGAGAA  
 Nana TTTC-CT**CC**CTAGTA--TGGGCGA**CA**GAAA**CC**AC-----AAAGGAGC--TATAGAGAA  
 Mcst TTAC-CC**CT**CTAGTA--TGGGCGA**CA**GAA**AG**ACT---TAG---GGAGC--TATAGAGTA  
 Rhox T-TTCCC**CC**TTAGTA--TGGGCGA**CA**GAAA**CC**AA-----CCATGGAGC--AATAGAAAA  
 Opfa T-TTCCC**CC**CTAGTA--TGGGCGA**CA**GAAA**CC**GACT--ACTAATGGAGC--GATAGAGAA  
 Paar T-TTCCA**CT**TTAGTA--TGGGAGA**CA**GAAA**AC**AACT--C---CAGCGC--AATAGAGA-  
 Gozo T-TTCCC**CC**TTAGTA--TGGGCGA**CA**GAAA**CC**AAC---TC---CGGCGC--AATAGAGAA  
 Ackr TTTC-CC**CT**TTAGTA--CAGGCGA**TC**GAAA**AC**AA---C---TTAGAGC--TATAGAAAA  
 Elev T-TTCCC**CC**TTAGTA--TGGGTGA**CA**AAAA**CC**ATC---ATG---GCGC--AATAGAGA-  
 Trdu TTCC-CA**CC**TAAGTA--CGGGCGA**CC**GAAA**CC**AC---CTAG---GAGC--AACAGAGAA  
 Amoc T-TTCCT**CC**CTAGTA--CGGGCGA**CC**GAA**AG**AACT--AG-----GAGC--AATAGAAAA  
 Hame T-TTCCA**TC**CTAGTA--TAGGAGA**TA**GAAA**GA**GC-----CTA-GGAGC--AATAGAGAT  
 Chso T-TTCCC**CC**TAAGTA--TGGGCGA**CA**GAAA**CC**AAC---ATT---GGAGC--AATAGAGAA  
 Lyto T-TTCCC**CC**TTAGTA--TAGGCGA**TA**GAA**AC**CC--CC---GGCGC--AATAGAAA-

|      |                                                                                                                  |
|------|------------------------------------------------------------------------------------------------------------------|
| Encr | - TTTCCC <b>CC</b> TTAGTA - <b>TAGGCGA</b> <b>TA</b> GAAA <b>CC</b> GAC - - - - ACC - GGCGC - - AATAGAGAA        |
| Bvar | TTCC - <b>CC</b> TTAGTA - <b>TGGGAGA</b> <b>CA</b> GAAA <b>CC</b> GAC - - - - T - TC - GGAGC - - AATAGAGAG       |
| Noco | TTAC - <b>CC</b> TTAGTA - <b>TGGGCGA</b> <b>CA</b> GAAA <b>CC</b> GAC - - - - TT - A - - GGAGC - - AATAGAGAA     |
| Chsp | CTCC - <b>CC</b> TCAGTA <b>AC</b> <b>CAGGCGA</b> <b>TA</b> GAAA <b>CC</b> AC - - - - C - - ACCGAGC - - TATACAAAA |
| Arja | - TTTCCC <b>CC</b> TTAGTA - <b>TAGGCGA</b> <b>TA</b> GAAA <b>GA</b> GA - - - - - CTAAGGCGC - - AATAGAGAA         |
| Pase | T - TCAAC <b>CC</b> TTAGTA - <b>TGGGAGA</b> <b>CA</b> GAAA <b>CC</b> GACC - - CC - - - GGGAGC - - TATAGAGAA      |
| Trel | - TTACCC <b>CT</b> TTAGTA - <b>TCGGTGA</b> <b>GA</b> GAAA <b>AC</b> ACA - - - - - C - CA - GAGC - - AACAGAACA    |
| Lifa | T - TCCAC <b>CC</b> CTAGTA - <b>CGGGCGA</b> <b>CC</b> AAAA <b>CC</b> GA - - - - - CAACAGAGC - - AATAGAGAA        |
| Acur | T - TCCCT <b>TT</b> TTAGTA - <b>TGGGCGA</b> <b>CA</b> GAAA <b>AC</b> AATT - - AG - - - - - AAGC - - AATAGAAAA    |
| Ampe | T - TTCCC <b>CC</b> CTAGTA - <b>TGGGCGA</b> <b>CA</b> GAAA <b>CC</b> AT - - - - CCCGATTGAGC - - AATAGAGAA        |
| Urja | TTTC - <b>CC</b> TAAGTA - <b>TCGGAGA</b> <b>CA</b> GAA <b>CC</b> GTC - - - ACCAAT - GAGC - - GATAGAGAA           |
| Enet | CTCC - <b>CT</b> TTAGTA - <b>CAGGCGA</b> <b>TC</b> GAAA <b>AC</b> AAC - - - - - TATAAGC - - AATAGAAAG            |
| Ptbr | T - TACCC <b>TT</b> TGAGTA - <b>TAGGCGA</b> <b>TA</b> AAA <b>AA</b> GAAA - - T - - - - - GAAGC - - TATA - ATA -  |
| Safa | - TTATTG <b>CT</b> GAAGTA - <b>TGGGCGA</b> <b>CA</b> GAA <b>AC</b> AA - - - - - AATAGAGC - - AACAGACAA           |
| Icae | T - TACCC <b>CC</b> TCAGTA - <b>TGGGCGA</b> <b>CA</b> GAAA <b>CC</b> AACT - - - - A - TTGGAGC - - GATAGAGAA      |
| Asmi | TCTTAAC <b>CT</b> AAAGTA - <b>TAGGAGA</b> <b>TT</b> GAAT <b>GC</b> ATAA - - - - - AAGGAGC - - TATAGACAA          |
| Foal | T - TTCCG <b>CC</b> TTAGTA - <b>TGGGAGA</b> <b>CA</b> AAAA <b>CC</b> CC - - - - - TTAGAAGC - - GACAGAAAA         |
| Drze | T - TTTTA <b>CC</b> TTAGTA - <b>TGGGAGA</b> <b>CA</b> GAAA <b>CC</b> AAAAG - - - - T - - - - GAGC - - AATAGAAAA  |
| Rhas | TTTC - <b>CC</b> TTAGTA - <b>TGGGCGA</b> <b>CA</b> GAAA <b>CC</b> AA - - - - A - - - - CAGGAGC - - AATAGAAAA     |
| Elac | TTTC - <b>CT</b> TTAGTA - <b>TGGGCGA</b> <b>CA</b> GAAA <b>CC</b> ACC - - - - CA - - - - GGCGC - - CATAGAAAA     |
| Kugu | TTCC - <b>CT</b> CCAGTA - <b>TAGGCGA</b> <b>TA</b> GAAA <b>CC</b> AC - - - - - ACA - CGAAGC - - TATAGAAAA        |
| Plor | T - TATCC <b>CC</b> TGAGTA - <b>TAGGCGA</b> <b>AA</b> GAAA <b>CC</b> AACC - - - - - ATCGGCGC - - AATAGAAAA       |
| Sgun | T - TACCC <b>CC</b> TTAGTA - <b>TAGGCGA</b> <b>TA</b> GAAA <b>CC</b> ACAT - - - - - AAGGAGC - - AACAGAGA -       |
| Zaco | TTTC - <b>CC</b> TTAGTA - <b>TGGGCGA</b> <b>CA</b> GAAA <b>CC</b> CACT - - - - - ACGGAGC - - TATAGATAA           |
| Zbfl | TTTC - <b>CC</b> CTAGTA - <b>TAGGTGA</b> <b>TA</b> GAAA <b>CC</b> AA - - - - - ATACGGAGC - - AACAGAGAA           |
| Spba | T - CTCCC <b>CT</b> TAAGTA - <b>CGAGCGA</b> <b>CC</b> GAAA <b>AC</b> GACC - - - - - CGCGGAGC - - GATAGAGA -      |
| Game | T - TACCC <b>CC</b> TCAGTA - <b>TGGGCGA</b> <b>CA</b> GAAA <b>CC</b> AACT - - AT - - - - AGGAGC - - AATAGAGAA    |
| Thth | T - TACCC <b>CC</b> CTAGTA - <b>TGGGCGA</b> <b>CA</b> GAAA <b>CC</b> AACC - - A - - - - TTGGAGC - - GATAGAGA -   |
| Xigl | C - TCCCC <b>CC</b> TTAGTA - <b>TGGGCGA</b> <b>CA</b> GAAA <b>CC</b> AACTA - - - - - GCGGAGC - - AATAGAGAA       |
| Hyja | T - TACCC <b>CC</b> CCAGTA - <b>TGGGCGA</b> <b>CA</b> GAAA <b>CC</b> AACTAT - - - - - CGGAGC - - TATAG - AGA     |
| Psan | TTAC - <b>CC</b> CTGAGTA - <b>CGGGCGA</b> <b>CA</b> GAAA <b>CC</b> AAC - - - - TACC - - GGAGC - - GATAGAAAA      |
| Cupa | TTTC - <b>CC</b> TTAGTA - <b>TGGGCGA</b> <b>CA</b> GAAA <b>CC</b> AA - - - - TATACAGGAGC - - AATAGAGAA           |
| Mpch | TTTC - <b>CC</b> CTAGTA - <b>TGGGCGA</b> <b>CA</b> GAAA <b>CC</b> AAC - - - - GTCT - AAGAGC - - AATAGATAA        |
| Char | T - TTCCA <b>CC</b> CTAGTA - <b>CGGGAGA</b> <b>CA</b> GAAA <b>CC</b> ACACA - - - - - CGGAGC - - TATAG - AAA      |
| Pser | - TCTCCC <b>CC</b> CTAGTA - <b>TAGGCGA</b> <b>TA</b> GAAA <b>CC</b> AA - - - - - CCACGGCGC - - AATAGAAAA         |
| Prol | C - TTCCA <b>CC</b> CTGAGTC - <b>CAGGCGA</b> <b>TA</b> AAAA <b>CC</b> AAAT - - - - - CCGGAGC - - AATAGAAAA       |
| Plbi | CTCC - <b>CC</b> TAAGTC - <b>CAGGCGA</b> <b>TA</b> AAAA <b>CC</b> AA - - - - - AT - TTGGAGC - - AATAGAAAA        |
| Calu | - CTCCCT <b>CC</b> CTAGTA - <b>TAGGCGA</b> <b>CA</b> GAAA <b>CC</b> AAAA - - A - - - - - GGAGC - - TATAGCACT     |
| Papa | TTTT - - <b>TC</b> TTAGTA - <b>CGGGAGA</b> <b>CC</b> AAAA <b>CC</b> AC - - - - AC - CC - - GGAGC - - TATAGAGAA   |
| Sufr | TTTC - <b>CA</b> CTCTAGTA - <b>TAGGTGA</b> <b>TA</b> GAAA <b>AC</b> ACC - - - - A - - T - - AGAGC - - AATAGAAAA  |
| Stci | TTTC - <b>CT</b> TTAGTA - <b>TAGGAGA</b> <b>TA</b> GAA <b>AC</b> AT - - - - A - C - T - - TGAGC - - GATAGAAAA    |
| Taru | T - TTCCA <b>CC</b> CTAGTA - <b>TAGGAGA</b> <b>TA</b> GAAA <b>CC</b> AACTA - - - - - GGAGC - - TATAG - ATA       |
| Rala | - TTTCTT <b>CC</b> CCAGTA - <b>TAGGCGA</b> <b>TA</b> GAAA <b>CC</b> GA - - - - - CTA - GGAGC - - CATAGAGAA       |

\*\*\*                      \*\*                      \*\*

|      | 4     | 4'        |       | ;     | HVR        | ;               |                       |
|------|-------|-----------|-------|-------|------------|-----------------|-----------------------|
| Scca | -TGTA | CCGCAAGG  | GAAA  | -GCTG | AAAAAGAAA  | -TGAATAAAT      | ---AATTA-AAGTACTAA    |
| Muma | -TGTA | CCGCAAGG  | AAAA  | -GCTG | AAAAAGAAA  | -TGAATA         | -AATCATT---AAGTACTAA  |
| Erca | TAGTA | CCGCAAGG  | GAAT  | -GCTG | AAGAGAAA   | -TGAATAAAT      | ---AG-TTAAAGCGCTAC    |
| Pose | -AGTA | CCGCAAGG  | GAAA  | -GCTG | AAGAGAAA   | -TGAATA         | -AATCGTTA---AAGCATAAC |
| Actr | -AGTA | CCGCAAGG  | GAAA  | -GCTG | AAGAGAAAAT | TGAAACAACT      | ---TG-TTAAAGCAATAA    |
| Scal | -AGTA | CCGCAAGG  | GAAA  | -GCTG | AAGAGAAAAT | TGAAACAACT      | ---TGTTA-AAGCAATAA    |
| Posp | -AGTA | CCGCAAGG  | GAAA  | -GCTG | AAGAGAAAAT | TGAAACA         | -ACTTGTTA---AAGCAACAA |
| Atsp | CAGTA | CCGCAAGG  | GAAA  | -GCTG | AAAAAGAAA  | -TGAACAACC      | ---CATCAAAGCACCAA     |
| Leoc | CAGTA | CCGCAAGG  | GAAA  | -GCTG | AAAAAGAAA  | -TGAACAACC      | ---CATCAAAGCACTAA     |
| Amca | -AGTA | CCGCAAGG  | GAAAC | -GATG | AAGAGAAA   | -TGAATA         | -ACCCGTTA---AAGCACCAA |
| Osbi | AAGTA | CCGCAAGG  | GAAAC | -GCTG | AAAAAGAAA  | -TGAACAAC       | ---CATTCAAGCACAAA     |
| Pabu | -AGTA | CCGCAAGG  | GAAA  | -GCTG | AAAAAGAAA  | -TGAACAACC      | ---CATTCAAGCATAAA     |
| Hial | -AGTA | CCGTAAGG  | GAAA  | -GCTG | AAGAGAAA   | -TGAATAACT      | ---C-ATTAAGCACAAA     |
| Elha | -AGTA | CCGCAAGG  | GAAA  | -GCTG | AAGAGAAG   | -TGAACAACCCGTAA | ---AAGCAAAGA          |
| Mlcy | -AGTA | CCGCAAGG  | GAAA  | -GCTG | AAAAAGAAA  | -TGAACAAACC     | ---C-ATAAAGCAAAAA     |
| Algl | -AGTA | CCGCAAGG  | GAAA  | -GCTG | AAGAGAGG   | -TGAATAGTT      | ---CG-TAAAAGCATAAA    |
| Ptgi | AAGTA | CCGCAAGG  | GAAA  | -GCTG | AAGAGAAA   | -TGAACAACC      | ---CA-TAAAAGCAATAA    |
| Alaf | -AGTA | CCGCAAGG  | GAAA  | -GCTG | AAGAGAAA   | -TGAATAACCCGTTA | ---AAGCACAAAC         |
| Nock | -AGTA | CCGCAAGG  | GAAA  | -GCTG | AAGAGAAA   | -TGAATAACC      | ---CG-TCAAAGCATAAA    |
| Anja | -AGTA | CCGCAAGG  | GAAA  | -GCTG | AAGAGAAA   | -TGAACAATCCAT   | -AT---AAGCAAAAA       |
| Gyki | -AGTA | CCGCAAGG  | GAAA  | -GCTG | AAAAAGAAA  | -TGAACAACC      | ---C-GATAAAGCAAAAA    |
| Syka | -AGTA | CCGCAAGG  | GAAA  | -GCTG | AAAAAGAAA  | -TGAACA         | -ACGCATAT---AAGCAACAA |
| Opma | -AGTA | CCGCAAGG  | GAAA  | -GCTG | AAAAAGAAA  | -TGAACAACT      | ---CATAA--AGCAATAG    |
| Comy | -AGTA | CCGCAAGG  | GAAA  | -GCTG | AAAAAGAAA  | -TGAACAA        | -ACCCATAA---AAGCATAAA |
| Sasp | AAGTA | CCACAAAGG | GAAA  | -GTTG | AATAGAAA   | -TGAATAAAT      | ---AT-CACAGGCAATAT    |
| Eupe | --GTA | CCGCAAGG  | GAAA  | -GTTG | AAAAAGAAA  | -TTAATAAACACCAA | ---AAGCAACAT          |
| Enja | AAGTA | CCGCAAGG  | GAAA  | -GCTG | AAGAGAAA   | -TGAATAACC      | ---CA-TTAAAGCACAGA    |
| Same | -AGTA | CCGCAAGG  | GAAA  | -GCTG | AAGAGAAG   | -TGAATAACG      | ---CACTAAAGTAAATA     |
| Chch | -AGTA | CCGCAAGG  | GAAA  | -GCTG | AAGAGAAA   | -TGAACA         | -ACTCATCA---AAGCGACAA |
| Grgr | -AGTA | CCGCAAGG  | GAAA  | -GCTG | AAGAGAAA   | -TGAACAACC      | ---CATT-TAAGCCTAGG    |
| Caau | -AGTA | CCGCAAGG  | GAAA  | -GCTG | AAGAGAAG   | -TGAATA         | -ACCCATAT---AAGCAGTAA |
| Cyca | TAGTA | CCGCAAGG  | GAAA  | -GCTG | AAGAGAAA   | -TGAATAACC      | ---CA-TATAAGCACTAA    |
| Dare | -AGTA | CCGCAAGG  | GAAAC | -GCTG | AAGAGAAA   | -TGAATAACC      | ---C-GTAAAGCAATAA     |
| Cost | AAGTA | CCGCAAGG  | GAAA  | -GCTG | AAGAGCAA   | -TGAACAAGT      | ---CA-TTTAAGCACAAA    |
| Leec | -AGTA | CCGCAAGG  | GAAA  | -GCTG | AAGAGTAA   | -TGAATAATC      | ---CA-TATAAGCACAAA    |
| CrIa | -AGTA | CCGCAAGG  | GAAA  | -GCTG | AAAAAGAAA  | -TGAACAACC      | ---CATA-TAAGCACCAAC   |
| Clmc | -AGTA | CCGCAAGG  | GAAA  | -GCTG | AAGAGAAA   | -TGAACAACC      | ---CA-TTAAAGCCAAAA    |
| Phin | -AGTA | CCGCAAGG  | GAAA  | -GCTG | AAAAAGAAA  | -TGAACAACCTCAT  | -CA---AAGCACAAAC      |
| Icpu | -AGTA | CCGCAAGG  | GAAAC | -GCTG | AAGAGAAG   | -TGAACAAAT      | ---AATT-AAAGCACAAAC   |
| Psto | -AGTA | CCGCAAGG  | GAAAC | -GCTG | AAGAGAAA   | -TGAATAAAT      | ---CATT-AAGCCTCAC     |
| Cora | -AGTA | CCGCAAGG  | GAAA  | -GCTG | AAAAAGAAA  | -TGAATAAACCATCA | ---AAGCACAAAC         |
| Eisp | AAGTA | CCGCAAGG  | GAAA  | -GCTG | AAGAGAAA   | -TGAACAACC      | ---CA-TATAAGCACAAA    |
| Apal | -AGTA | CCGCAAGG  | GAAA  | -GCTG | AAAAAGAAA  | -TGAATA         | -ATTACACA---A-GCACAAT |
| EsLu | -AGTA | CCGTAAGG  | GAAA  | -GCTG | AAAAAGAAG  | -TGAACAAGT      | ---CATT-CAAGCCTTGA    |
| Dape | -AGTA | CCGCAAGG  | GAAA  | -GCTG | AAAAAGAAA  | -TGAACAACCT     | ---CATATAAGCCCTAA     |
| Glse | -AGTA | CCGCAAGG  | GAAA  | -GCTG | AAAAAGAAA  | -TGAACAACC      | ---CATCCAAGCTTAGA     |
| Naar | -AGTA | CCGCAAGG  | GAAA  | -GCTG | AAGAGAAA   | -TGAACAACC      | ---C-ATCAAAGCCTAAA    |
| Baoc | -AGTA | CCGCAAGG  | GAAA  | -GCTG | AAGAGAAA   | -TGAACAACCCATTA | ---AAGCCTAAA          |
| Opso | AAGTA | CCGCAAGG  | GAAAG | -GCTG | AAAAAGAAA  | -TGAATAACC      | ---TA-TTAAAGCCTAAA    |
| Alte | -AGTA | CCGCAAGG  | GAAA  | -GCTG | AAGAGAAA   | -TGAACAACCCATTT | ---AAGCCTAAA          |
| Plap | AAGTA | CCGCAAGG  | GAAA  | -GCTG | AAGAGAAA   | -TGAACAACC      | ---CA-TTTAAGCCTAAA    |



Plal AAGTA**CC**GCA**AGG**GAAA - GCTGAAAAAGAAG - TGAACAACC --- CA - TATAAGCACCAT  
 Sami - AGTA**CC**GCA**AGG**GAAA - GCTGAAAGAGAAG - TGAATA - ACCTATAC --- AAGCACTGA  
 Rere - AGTA**CC**GCA**AGG**GAAA - GCTGAAAGAGAAA - TGAACAACC --- C - ATCTAAGCGCCTA  
 Gama AAGTA**CC**GTA**AGG**GAAA - GTTGAAAGAGTGA - TGAAGAAGTC --- CA - TATAAGCACAGT  
 Onmy - AGTA**CC**GCA**AGG**GGAA - GCTGAAAGAGAAT - TGAATAACC --- CATTTAAGCCTAGA  
 Sasa AAGTA**CC**GCA**AGG** - AAA - GCTGAAAGAGAAA - TGAACAACC --- CATTTAAGCCTAGA  
 Cola - AGTA**CC**GCA**AGG**GAGA - GCTGAAAGAGAAC - TGAACAACCCATTT --- AAGCCTAGA  
 Dita - AGTA**CC**GCA**AGG**GAAA - GCTGAAAGAGGAA - TGAACA - ACTCACTC --- AAGCCCAG  
 Gogr - AGTA**CC**GCA**AGG**GAAA - GCTGAAAGAGAAA - TGAACAACC --- CACT - TAAGCCTAGT  
 Chsl A - GTA**CC**GCA**AGG**GAAG - GCTGAAATAGAAG - TGAATAACT --- TG - TTTAAGCCCGAA  
 Atja - AGTA**CC**GCA**AGG**GAAA - GCTGAAAGAGAAA - TGAATA - ATTTATTC --- AAGCCTAAA  
 lido - AGTA**CC**GCA**AGG**GAAA - GCTGAAAGAGAAA - TGAACAAT --- TA - TTCAAGCCTGAA  
 Auja - AGTA**CC**GCA**AGG**GAAA - GTTGAAAAAGAAA - TGAATAACCCCTTT --- AAGCCCCAA  
 Chag - AGTA**CC**GCA**AGG**GAAA - GCTGAAAAAGAAG - TGAATAAAC --- CTCCAAAGCCTAAA  
 Hami - AGTA**CC**GCA**AGG**GAAT - GCTGAAAAAGAAA - TGAAGAATTAT - CTTTTAAAGCCTTAA  
 Saun - AGTA**CC**GCA**AGG**GAAC - GCTGAAAAAGAAA - TGAAGAACTATTTATC --- AAGCAAAGA  
 Nema AAGTA**CC**GCA**AGG**GAAA - GCTGAAAGAGAAA - TGAACAAC --- AC - CCCAAGCCAAAT  
 Disp - AGTA**CC**GCA**AGG**GAAA - GCTGAAAGAGAAG - TGAACAAC --- ACCCC - AAGCTGTGA  
 Myaf - AGTA**CC**GCA**AGG**GAAA - GCTGAAAGAGAAA - TGAACAATACCCC --- AAGCCATAA  
 Lagu CAGTA**CC**GCA**AGG**GAAA - GTTGAAAGAGATA - TGAAG - AAGC --- CATT - CAAGCAAAGA  
 Trtr - AGTA**CC**GCA**AGG**GAAA - ACTGAAATATTAATGAAAAC --- ACTCAAGCAAAC  
 Zucr - AGTA**CC**GCA**AGG**GAAA - GCTGAAAAATCCAATGAAAAT --- ACTTAAGCGTAGA  
 Pxja - AGTA**CC**GCA**AGG**GAAA - GCTGAAAGAGAAA - TGAACAAC --- TGTTTAAGCCGCAA  
 Pxlo AAGTA**CC**GCA**AGG**GAAA - GCTGAAAGAGAAA - TGAACAAC --- TG - TTTAAGCCACAA  
 Pctr - AGTA**CC**GCA**AGG**GAAA - GTTGAAAGAGAAA - TGAAGAAA - ACTCATCT --- AAGCCAATG  
 Apsa - AGTA**CC**GCA**AGG**GAAA - GCTGAAAAAGAAG - TGAACA - ACTCATACA --- GCATAAA  
 Cabe - AGTA**CC**GCA**AGG**GAAA - GCTGAAAGAGAAG - TGAACAAC --- CATGCAAGCCCTGA  
 Bzze - AGTA**CC**GCA**AGG**GAAC - GCTGAAAGAGAAA - TGAATAAAC --- CAGGAAAGCCCAGA  
 Siim - AGTA**CC**GCA**AGG**GAAC - GATGAAAGAGAAA - TGAACAACC --- CATAAAGCCCTAA  
 Ctru - AGTA**CC**GCA**AGG**GAAC - GCTGAAAGAGAAA - TGAACAACCCAGTA --- AAGCCCAGA  
 Dpbr - AGTA**CC**GCA**AGG**GAAC - GCTGAAAGAGAAA - TGAACA - AATTAGTA --- AAGCCCAAA  
 Caki - AGTA**CC**GCA**AGG**GAAA - ACTGAAAAAGAAA - TGAACAAT --- CATT - AAGTACTGA  
 Phja - AGTA**CC**GTA**AGG**GAAA - GCTGAAAAAGAAA - TGAATAAAC --- CATT - TAAGCGCAGA  
 Brsp - AGTA**CC**GCA**AGG**GAAA - GCTGAAAAAGAGA - TGAATAGATCTC - TT --- AAGTTTTAT  
 Gamo - AGTA**CC**GCA**AGG**GAAC - GCTGAAAAAGAAA - TGAATAAACCCATTT --- AAGACCAA  
 Lolo AAGTA**CC**GCA**AGG**GAAC - GCTGAAAAAGAAG - TGAATAAAC --- CA - TTTAAGCACCGA  
 Batr - AGTA**CC**GCA**AGG**AAAA - GCTGAAAGACCC - TCAATGAAACAAGTAAT --- TAGCACTAA  
 Prmy - AGTA**CC**GCA**AGG**GAAA - GCTGAAAAAGAAT - TGAAGAA - T --- AA - TTTAAGCACAAA  
 Loli - AGTA**CC**GCA**AGG**GAAC - GCTGAAAGAGAAA - TGAAGAACCCCA - CG --- ACGTTTTAAA  
 Loam AAGTA**CC**GCA**AGG**GAAA - GCTGAAAGAGATA - TGAAGAAGCC --- CA - GTGAAGTTTAGA  
 Chab - AGTA**CC**GCA**AGG**GAAC - ACTGAAAGAGAAA - TGAATAACT --- C - AGCAAAGTAATAA  
 Chto - AGTA**CC**GCA**AGG**GAAC - ACTGAAAGAGAAA - TGAATAACT --- C - AGCAAAGTAATAA  
 Majo - AGTA**CC**GCA**AGG**GAAA - GCTGAAAGAGAAG - TGAATAAAT --- CAGTTTAAGCATAAA  
 Hlst - AGTA**CC**GCA**AGG**GAAA - GATGAAAGAGTAA - TGAACAACC --- A - ACAAAGCAATGA  
 Clpe - AGTA**CC**GCA**AGG**GAAC - GCTGAAAGAGAAA - TGAATA - ACCCAG - A --- AAGTACTAA  
 Mlmr - AGTA**CC**GCA**AGG**GAAC - GCTGAAAGAGAAA - TGAACAACC --- CTGTAGAAGTAACAA  
 Crcr AAGTA**CC**GCA**AGG**GAAC - GCTGAAAGAGAAA - TGAATAACC --- ATCCAAAGTTACAA  
 Muce AAGTA**CC**GCA**AGG**GAAC - GCTGAAAGAGAAA - TGAATAACC --- AT - CCAAAGTTACAA  
 Bege - AGTA**CC**GCA**AGG**GAAC - GCTGAAAAAGAAA - TGAACAACG --- CA - GTAAGGTAACAT  
 Mela AAGTA**CC**GTA**AGG**GAAC - GCTGAAAGAGAAA - TGAATAACT --- CAGTAAAGCACAAAC  
 Hats - AGTA**CC**GCA**AGG**GAAC - GCTGAAAGAGAAA - TGAATAATT --- CAGTAAAGCACAAAC  
 Orla - AGTA**CC**GCA**AGG**GAAA - GCTGAAAGAGAAA - TGAATAAAT --- C - AGTCAAGAGAAGT

Cosa -AGTA**CC**GCA**AGG**GAAC-GCTGAAAAAGAAA-TGAAAAA---CCAGTA---AAGCAAAGA  
 Exsp -AGTA**CC**GCA**AGG**GAAC-GCTGAAAGAGAAA-TGAAACA-AACCAGTA---AAGCACTAA  
 Depa AAGTA**CC**GCA**AGG**GAAA-GCTGAAAAAGAAA-TGAAATAAAC---CA-TCAAAGCCAAAA  
 Rima -AGTA**CC**GCA**AGG**GAAC-GCTGAAAGAAAA-TGAAACAAAT---TAGT-AAAGTATAAC  
 Fuol -AGTA**CC**GTA**AGG**GAAT-GCTGAAAGAGAAA-TGAAACAACC---CAGTC-AAGCACAGA  
 Gmaf -AGTA**CC**GCA**AGG**GAAC-GCTGAAAGAGAAA-TGAAAGAACC---CAG-TAAAGTAAAAA  
 Xeei -AGTA**CC**GCA**AGG**GAAC-GCTGAAAGAGAAA-TGAAAAA-ACCCAGTC---AAGCACCAA  
 Pros -AGTA**CC**GCA**AGG**GAAA-GCTGAAAGAGAAA-TGAAACAAAC---CATT-TTAAGCCCAA  
 Scmi -AGTA**CC**GCA**AGG**GAAA-GTTGAAAAAGAAA-TGAAATAAAC---CA-TTTAAGCCCTAA  
 Rolo -AGTA**CC**GCA**AGG**GAAA-GCTGAAAAAGAAA-TGAAATAACT---CATT-CAGCTACAA  
 Cere -AGTA**CC**GCA**AGG**GAAA-GCTGAAAGAGAAA-TGAAATAAAT---CATTTAAGCCCTAA  
 Daga -AGTA**CC**GTA**AGG**GAAA-GCTGAAAAAGGAA-TGAAAGAGCC---C-ATTTAAGCTTCAA  
 Anco -AGTA**CC**GCA**AGG**GAAA-GCTGAAAAAGAAA-TGAAATAACC---CATTCAAGCCTAAA  
 Dmve -AGTA**CC**GCA**AGG**GAAA-GCTGAAATAGTAA-TGAAATAACCCAT-AT---AAGCCCAA  
 Dmar -AGTA**CC**GCA**AGG**GAAA-GCTGAAAAAGAAA-TGAAACAACCCATCA-ATTAAGCCCAA  
 Anka -AGTA**CC**GCA**AGG**GAAA-GCTGAAAAAGAAA-TGAAACAACC---CA-TTTAAGCCCAA  
 Moja -AGTA**CC**GCA**AGG**GAAA-GCTGAAAAAGAAA-TGAAATA-ACCCATTA---AAGCTTAAA  
 Hoja -AGTA**CC**GCA**AGG**GAAA-GCTGAAAAAGAAA-TGAAACA-ACCCATTC---AAGCCTAAA  
 Bede CAGTA**CC**GCA**AGG**GAAC-GCTGAAAGAGAAA-TGAAACAAC---CATTTTAAGCCCAA  
 Bosp -AGTA**CC**GCA**AGG**GAAC-GCTGAAAGAGAAA-TGAAACA-AACCATTTT--AAGCCCAA  
 Mysp -AGTA**CC**GCA**AGG**GAAA-GCTGAAAAAGAAA-TGAAACA-ACCCATTC---AAGCCAAAA  
 Osja TAGTA**CC**GCA**AGG**GAAA-GCTGAAAAAGAAA-TGAAACAACC---CA-TTTAAGCTAAAA  
 Sgro -AGTA**CC**GCA**AGG**GAAA-GCTGAAAAAGAAA-TGAAATAAAC---C-ATTCAAGTCAAAA  
 Pzpa -AGTA**CC**GCA**AGG**GAAA-GCTGAAAGAAAA-TGAAAGAAATC--CAAT--AAGCCTAAG  
 Zeja -AGTA**CC**GCA**AGG**GAAC-CCTGAAAAAGAAA-TGAAACAACACTCAACTACAAGAACCCA  
 Znne -AGTA**CC**GCA**AGG**GAAC-GCTGAAAGAAAA-TGAAACAAAT---TA-AATAAGTGAGAC  
 Zefa -AGTA**CC**GCA**AGG**GAAC-GCTGAAAAAGAAA-TGAAATA-AATTAAT---AAGCATATT  
 Acni -AGTA**CC**GCA**AGG**GAAC-GCTGAAAAAGAAG-TGAAACAAAT---CA-AATAAGCCTAAT  
 Ncrh -AGTA**CC**GCA**AGG**GAAC-GCTGAAAAAGAAG-TGAAACAAAT---CAAT-AAGCCTAAT  
 Agca -AGTA**CC**GCA**AGG**GAAA-GCTGAAAGAGAAA-TGAAACAACCCAGTT---AAGCATAAA  
 Hydy -AGTA**CC**GCA**AGG**GAAT-GCTGAAAGAGAAG-TGAAACAACACT---CA-TAAAAGCTCAGA  
 Gsac -AGTA**CC**GCA**AGG**GAAC-GCTGAAAGAGAAA-TGAAACAACCCAGAC---AAGCTAAGA  
 Pevo -AGTA**CC**GCA**AGG**GAAA-GCTGAAAGAGAAG-TGAAATAAAT---AA--TAAAGCCACAC  
 Hiku -AGTA**CC**GCA**AGG**GAAA-GCTGAAAGAGAAA-TTAAACA-AGTAATTT---AAGTATATA  
 Inpa -AGTA**CC**GCA**AGG**GAAC-GCTGAAAAAGAAA-TGAAAAAACC---CAGAAAAGTGTA  
 Auch CAGTA**CC**GCA**AGG**GAAAAGCTGAAAGAAAA-TGAAATAC-T---CAACTCAAGCACCAA  
 Fico -AGTA**CC**GCA**AGG**GAAA-GCTGAAAGAGAAG-TGAAACA-ACTCACACG--A-GCAAAGA  
 Macs -AGTA**CC**GCA**AGG**GAAA-GCTGAAAGAGAAG-TGAAACAACACT---CAGCAAAGCAATAA  
 Moal -AGTA**CC**GCA**AGG**GAAA-GCTGAAAAAGAAA-TGAAACAATCAGTC---AAGCAAAAA  
 Syma AAGTA**CC**GCA**AGG**GAAC-GCTGAAAAAGAAA-TGAAAAAAT---CAGTTAAGTTAAAA  
 Maf r -AGTA**CC**GCA**AGG**GAAC-AATGAAAAAGAAA-TGAAACA-ACTCAACA---AAGTACAAA  
 Dcpe -AGTA**CC**GCA**AGG**GAAT-GCTGAAAAAGAAA-TGAAATAACT---CATTACAAGCCCTAA  
 Dct i -AGTA**CC**GCA**AGG**GAAT-GCTGAAAAAGAAG-TGAAACAACACT---CATTACAAGCCCTAA  
 Hehi AAGTA**CC**GCA**AGG**GATT-GCTGAAAGAGAAA-TGAAAGAACC---CA-GTAAAGCCAAGT  
 Stam -AGTA**CC**GCA**AGG**GAAC-GCTGAAAGAGAAA-TGAAAAAACCAGTAA---AGCTTAAA  
 Hogi -AGTA**CC**GCA**AGG**GAAC-GCTGAAAAAGAAA-TGAAATAACC---CA-GTAAAACTTTAA  
 Erzo -AGTA**CC**GCA**AGG**GAAA-GCTGAAAAAGAAG-TGAAAGAAATCAGTA---AAGCCTAGA  
 Hxot -AGTA**CC**GCA**AGG**GAAC-GCTGAAAGAGAAG-TGAAACAACCCAGTA---AAGCCTAAA  
 Core -AGTA**CC**GCA**AGG**GAAT-GCTGAAAGAGAAA-TGAAACAAGC---CAGT-GAAGCCTAAG  
 Apve -AGTA**CC**GCA**AGG**GAAC-GCTGAAAGAGAAA-TGAAACAACCCAG-TA---AAGCCTAAA  
 Lat j -AGTA**CC**GCA**AGG**GAAC-GCTGAAATAGAGA-TGAAACAGCC---CAGTAAAGCCCTAA  
 Laja -AGTA**CC**GCA**AGG**GAAC-GCTGAAAAAGTAAATGAAAGAACC---CAGTA-AAGCATAGA

Syja -AGTA**CC**GCA**AGG**GAAC-GCTGAAAGAGAAA-TGAAAAACCC---AG-TTTAAGCCTAAA  
 Epme -AGTA**CC**GCA**AGG**GAAT-GCTGAAAACTAAATGAAATAAAC---AAGTGAAGCCCAA  
 Grse AAGTA**CC**GCA**AGG**GAAC-CCTGAAAGAGAAA-TGAAACAAGT---CAGTAAAGCCCAA  
 Clja -AGTA**CC**GCA**AGG**GAAC-ATTGAAATAAAAA-TGAAACAAT---ATAG-CAAGTTTAA  
 Ogcy -AGTA**CC**GCA**AGG**GAAA-GCTGAAACAGAAA-TGAAACAACCCA-TAAC-CAAGCCCAA  
 Plna -AGTA**CC**GCA**AGG**GAAT-GCTGAAAGAGAAA-TGAAATA-ACCCAGTT---AAGTCCAAA  
 Lema -AGTA**CC**GCA**AGG**GAAC-GCTGAAAGAGAAA-TGAAAGAACC---C-AGCAAAGCTACAA  
 Etzo -AGTA**CC**GCA**AGG**GAAC-GCTGAAAGAGAAA-TGAAATAACC---CAGT-GAAGCCTACA  
 Apse -AGTA**CC**GCA**AGG**GAAC-GCTGAAAGAGAAA-TGAAACAAT---CAGT-AAAGCACAAA  
 Epde -AGTA**CC**GCA**AGG**GAAA-GCTGAAAGAGAAA-TGAAATAACCCAGATA---AAGCCTAGA  
 Slja -AGTA**CC**GCA**AGG**GAAC-GCTGAAAGAGAAG-TGAAACATACTCAC---AAGCCCGAA  
 Bsja -AGTA**CC**GCA**AGG**GAAC-GCTGAAAAAGTAA-TGAAACA-ACCCAGTA---AAGCTTTAA  
 Ecna -AGTA**CC**GCA**AGG**GAAA-GCTGAAAGAGAGA-TGAAAAAGCC---CAGTAAAGCCTAAT  
 Cohi CAGTA**CC**GCA**AGG**GAAA-GCTGAAAGAGAGG-TGAAAAAGTC---CAATAAAGGTAAAG  
 Caar -AGTA**CC**GCA**AGG**GAAA-GCTGAAAGAGAAA-TGAAATA-AACCAGTA---AAGCTAAAA  
 Came -AGTA**CC**GTA**AGG**GAAA-GCTGAAAGAGAGA-TGAAACAGACCAGTAA---AGCCATAA  
 Mema -AGTA**CC**GCA**AGG**GAAC-GCTGAAAGAGAGA-TGAAACAGAC---CAGTAAAGCCTAAA  
 Lenu -AGTA**CC**GCA**AGG**GAAA-GCTGAAATAGAAA-TGAAAA-ACCCAGTCCCGAAGCCCAAG  
 Brja -AGTA**CC**GTA**AGG**GAAC-GCTGAAAGAGAAA-TGAAACA-ACCCAGTA---AAGCCCAA  
 Plma -AGTA**CC**GCA**AGG**GAAC-GCTGAAAGAGAAA-TGAAATAACCCAGTAT---AAGCCTTAA  
 Emst -AGTA**CC**GCA**AGG**GAAT-GCTGAAAGAGAAG-TGAAACAATC---CA-GTAAAGCCTAAA  
 Ptti -AGTA**CC**GCA**AGG**GAAA-GCTGAAAGAGAAA-TGAAACA-ACTCAGTA---AAGCATATA  
 Losu -AGTA**CC**GCA**AGG**GAAC-GCTGAAAAAGAAA-TGAAATA-ACCCAGTA---AAGCACAAA  
 Geoy AAGTA**CC**GCA**AGG**GAAT-GCTGAAAAAGAAA-TGAAATAAAC---CA-GTAAAGCTTGGA  
 Dipi AAGTA**CC**GCA**AGG**GAAT-GCTGAAAGAGAAA-TGAAACAACC---CA-GTAAAGCTGAAA  
 Pama -AGTA**CC**GCA**AGG**GAAC-GCTGAAAGAGGAG-TGAAACAACC---CAGTAAAGCCTAGA  
 Leob -AGTA**CC**GCA**AGG**GAAC-GCCGAAAGAGAAA-TGAAACA-ACCCAGTTA---AAGCCCAA  
 Neba -AGTA**CC**GCA**AGG**GAAC-GCTGAAAGAGAAA-TGAAACAACCTCAGTA---AAGCAAAAA  
 Pdpi -AGTA**CC**GCA**AGG**GAAT-GCTGAAAGAGAGA-TGAAAGAGAC---CAGT-TAAGCCATAA  
 Nimi AAGTA**CC**GCA**AGG**GAAT-GCTGAAAGAGAAA-TGAAACAAC---CAGTAAAGCCCAA  
 Uptr -AGTA**CC**GCA**AGG**GAAA-GCTGAAAGAGAAG-TGAAATAAAT---CAGTCTAAGCATAAT  
 Pesc -AGTA**CC**GCA**AGG**GAAT-GCTGAAAGAGAAG-TGAAAAAACC---C-AGTAAAGCAAATA  
 Baar -AGTA**CC**GCA**AGG**GAAC-GCTGAAAGAGAAA-TGAAAGAACC---CAGTAAAGCCTAGA  
 Moar -AGTA**CC**GCA**AGG**GAAC-GCTGAAAGAGAAA-TGAAACAAC---CAGTAAAGCCTAGA  
 Toja -AGTA**CC**GCA**AGG**GAAA-GCTGAAAGAGTGA-TGAAACAGCC---C-AGTAAAGCCTAAA  
 Chau -AGTA**CC**GCA**AGG**GAAC-GCTGAAAGACACA-TGAAACAGGA---CAAT-AGGCCTAAA  
 Chse -AGTA**CC**GCA**AGG**GAAC-GTTGAAAGAGAAC-TGAAACAACC---CA-GTTAAGTCTAAA  
 Enar -AGTA**CC**GCA**AGG**GAAC-GCTGAAAGAGAAT-TGAAATAACC---CA-GTTAAGCAAAAA  
 Hpty -AGTA**CC**GCA**AGG**GAAC-GCTGAGAAGAGAAATGAAAAAACC---C-AGTAAAGCCTAGA  
 Nana -AGTA**CC**GCA**AGG**GAAC-GCTGAAAGAGAAA-TGAAATAAACC---AGTAAAGTATAAA  
 Mcst -AGTA**CC**GTA**AGG**GAAC-GCTGAAAGAGTAG-TGAAACAGCT---CA-GTAAAGCTTAGA  
 Rhox -AGTA**CC**GCA**AGG**GAAA-GCTGAAAGAGAGA-TGAAATA-GCCCAATA---AAGCCTAAA  
 Opfa -AGTA**CC**GCA**AGG**GAAC-GCTGAAAGAGCAAATGAAATAACC---CAGTGAAGCCTTAA  
 Paar AAGTA**CC**GCA**AGG**GAAC-GCTGAAAGAGAAA-TGAAATAACC---CA-GTAAAGCCTTAA  
 Gozo -AGTA**CC**GCA**AGG**GAAC-GCTGAAAGAGAAA-TGAAACAAC---CAGTAAAGCCTAAG  
 Ackr -AGTA**CC**GCA**AGG**GAAC-GCTGAAAGAGAAA-TGAAACAACC---CAGT-TAAGTAATAT  
 Elev AAGTA**CC**GTA**AGG**GAAA-GTTGAAAGAGAAA-TGAAATAACC---CA-GTAAAGCCTAAA  
 Trdu -AGTA**CC**GCA**AGG**GAAA-GCTGAAAGAGTAA-TGAAATAACC---CAGT-AAAGCACTAA  
 Amoc -AGTA**CC**GCA**AGG**GAAA-GCTGAAAGAGAAA-TGAAACAACC---CAGTAAAGCCCAA  
 Hame -AGTA**CC**GCA**AGG**GAAG-GCTGAAAGAGAAA-TGAAATA-ATCCAGAA---AAGCCTAAA  
 Chso -AGTA**CC**GCA**AGG**GAAA-GCTGAAAGAGAAA-TGAAACAACC---CAGTTAAGCCTAAA  
 Lyto AAGTA**CC**GCA**AGG**GAAC-GCTGAAAGAGAGA-TGAAAAAGAC---CA-GTAAAGCCTAAA

Encr -AGTA**CC**GCA**AGG**GAAT -GCTGAAAGAGAAA -TGAAACA -ACCCAGTG - - - AAGCCTAAG  
 Bvar -AGTA**CC**GCA**AGG**GAAA -GCTGAAAAAGGAA -TGAAACAACCCAGTA - - - AAGCCTTAA  
 Noco -AGTA**CC**GCA**AGG**GAAC -GCTGAAAGAGAAA -TGAAATAACC - - - CA -GTAAAGCACCAA  
 Chsp -AGTA**CC**GCA**AGG**GAAA -GCTGAAAAAGAAA -TGAAATAACT - - - CAAT -TAAGCCCTAA  
 Arja -AGTA**CC**GCA**AGG**GAAT -GCTGAAAGAGAAA -TGAAACA -AACCAGTA - - - AAGCCTAAA  
 Pase -AGTA**CC**GCA**AGG**GAAA -GCTGAAAGAGAAA -TGAAACAATG - - - CATTAAAAGTAATAA  
 Trel -AGTA**CC**GCA**AGG**GAAT -GCTGAAAGAGAGA -TGACAAA -GGTCGTGT - - - AAGCATTAA  
 Lifa -AGTA**CC**GCA**AGG**GAAA -GCTGAAATAGCAG -TGAAACA -AGTCAGTG - - - AAGTAAAGA  
 Acur -AGTA**CC**GCA**AGG**GAAC -GCTGAAAGAGAAG -TGAAA -AACC - - - CAGTAAAGTCAAAA  
 Ampe -AGTA**CC**GCA**AGG**GAAC -GCTGAAAGAGAAG -TGAAATAACC - - - C -ATTAAGCATAGA  
 Urja -AGTA**CC**GCA**AGG**GAAA -GCTGAAAAAGAAA -TGAAATAAAC - - - CAAGTTAAGCCTGAA  
 Enet -AGTA**CC**GCA**AGG**GAAA -GCTGAAAAAGAAA -TGAAACAAACCTCTA - - - AAGCGCGAG  
 Ptbr AAGTA**CC**GCA**AGG**GAAA -GCTGAAAAAGAAA -TGAAACAAAT - - - CA -GTAAAGCACATA  
 Safa -AGTA**CC**GCA**AGG**GAAT -GCTGAAATAGAAA -TGAAAAA -AATCAGTT - - - AAGCACAGA  
 lcae -AGTA**CC**GCA**AGG**GAAC -GCTGAAAGAGAAA -TGAAATAACC - - - C -AGTGAAGCCTAGA  
 Asmi -AGTA**CC**GCA**AGG**GAAT -GCTGAAATAGAAA -TGAAA -AACC - - - C -AGTTAAGTATAAT  
 Foal -AGTA**CC**GCA**AGG**GAAA -GTTGAAAAAGAAA -TGAAAAATTA - - - - AGCAACACCCCAA  
 Drze -AGTA**CC**GCA**AGG**GAAT -GCTGAAAGAATAA -TGAAAAATTT - - - A - - - TAAGGATAAAA  
 Rhas -AGTA**CC**GCA**AGG**GAAA -GCTGAAAGAGAAA -TGAAACAACC - - - AACT -GAAGGAGAAA  
 Elac - -GTA**CC**GCA**AGG**GAAA -GCTGAAAGAGAAA -TGAAATAACC - - - CA -GTAAAGTACAAA  
 Kugu -AGTA**CC**GCA**AGG**GAAT -GCTGAAAGAGAGA -TGAAACAGCC - - - CA -GTAAAGCATTAA  
 Plor -AGTA**CC**GCA**AGG**GAAC -GCTGAAAGAGAAA -TGAAATAACC - - - C -AGTTAAGCTACAA  
 Sgun AAGTA**CC**GCA**AGG**GAAA -GCTGAAAGAGAAA -TGAAACAACC - - - CA -GTAAAGCACAAA  
 Zaco -AGTA**CC**GCA**AGG**GAAC -GCTGAAAGAGAAA -TGAAATAACC - - - CA -GTTAAACCCAAA  
 Zbfl -AGTA**CC**GCA**AGG**GAAC -GCTGAAAGAGAAA -TGAAACAACC - - - CAGTA -AAGCCAAA  
 Spba AAGTA**CC**GCA**AGG**GAAC -GCTGAAAGAAAGA -TGAAACAGAT - - - TA -GTAAAGCACAAA  
 Game -AGTA**CC**GCA**AGG**GAAC -GCTGAAAGAGAAA -TGAAACAACC - - - CAGTGAAGCCTAAA  
 Thth AAGTA**CC**GCA**AGG**GAAC -GCTGAAAGAGAAA -TGAAACAACC - - - CA -GTAAAGCCTAAA  
 Xigl -AGTA**CC**GCA**AGG**GAAC -GCTGAAAGAGAGG -TGAAAAAGCCCAG -TA - - - AAGCCTAAA  
 Hyja AAGTA**CC**GCA**AGG**GAAT -GCTGAAAAAGAAA -TGAAATAATT - - - CAGTGAAGCCAAA  
 Psan -AGTA**CC**GAA**AGG**GAAC -GCTGAAAAAGAAA -TGAAATAACC - - - CA -GTCAAGCTTAAA  
 Cupa -AGTA**CC**GCA**AGG**GAAC -GCTGAAAGAGAAA -TGAAATAACC - - - CAGT -AAAGCCTAAA  
 Mpch -AGTA**CC**GCA**AGG**GAAC -GTTGAAAGAGAAA -TGAAACAAAT - - - CA -GTAAAGTAAGAA  
 Char AAGTA**CC**GCA**AGG**GAAC -GCTGAAAGAGTAA -TGAAACAATC - - - CAGTAAAGTACAGA  
 Pser -AGTA**CC**GCA**AGG**GAAA -GCTGAAAGAGAGA -TGAAACA -GCCCAGTA - - - AAGTCTAAA  
 Prol -AGTA**CC**GCA**AGG**GAAA -GCTGAAAAAGAGA -TGAAATAGCC - - - C -AGTAAAGCTTAAT  
 Plbi -AGTA**CC**GCA**AGG**GAAA -GCTGAAAGAGAGA -TGAAAAAGCC - - - CAGT -AAAGCTTAAA  
 Calu -AGTA**CC**GCA**AGG**GAAG -GCTGAAAGAGCAA -TGAAACA -ACGC - - - TA - - - AAGTAAAGA  
 Papa -AGTA**CC**GCA**AGG**GAAA -GCTGAAAGAGAAA -TGAAAAGA - - - - CA -ACAAAAGTACAAA  
 Suf r -AGTA**CC**GCA**AGG**GAAA -GCTGAAAGAGAAA -TGAAATAACC - - - CA -GTTAAGCCAGAA  
 Stci -AGTA**CC**GCA**AGG**GAAA -GCTGAAAAAGAAG -TGAAACAACC - - - CA -GTTAAGCGATAA  
 Taru AAGTA**CC**GCA**AGG**GAAC -GCTGAAAGAGAAA -TGAAATAACC - - - CAGTAAAGTAAAAA  
 Rala -AGT**G****CC**GCA**AGG**GAAT -GCTGAAAGGGAAG -TGAAACA -ACCCAGTA - - - AAGCCTTAA  
 \* \* \* \* \*

|      | 5                     | 5'  | 6                     | HVR              |
|------|-----------------------|-----|-----------------------|------------------|
| Scca | AAA--GCA-G-AG-ATTAACC | CTC | -GTACC-TTTGGCATCATGAT | TTAAT TAGAA--AAA |
| Muma | AAA--GCA-G-AG-ATTACAC | CTC | -GTACC-TTTTGCATCATGAT | TTAGC TAGAA--AAA |
| Erca | ACA--GCA-G-AG-ATCAAAT | CTC | GGTACC-TTTTGCATCATGAT | CTAGT AAGTT-A-TA |
| Pose | ACA--GCA-G-AG-ATAAAAC | CTC | -GTACC-TTTTGCATCATGGT | CTAGC AAGTC-AGAT |
| Actr | AAA--GCA-A-AG-ATTAATA | CTI | -GTACC-TTTTGCATCATGAT | TTAGC CAGTT-CTTA |
| Scal | AAA--GCA-A-AG-ATTAATA | CTI | -GTACC-TTTTGCATCATGAT | TTAGC CAGTT-CTTA |
| Posp | AAA--GCA-A-AG-ATTAATA | CTI | -GTACC-TTTTGCATCATGAT | TTAGC CAGTT-CTTG |
| Atsp | AAA--GCA-G-AG-ATTAATA | CTC | -GTACC-TTTTGCATCATGAT | TTAGC TAGTC-TA-C |
| Leoc | AAA--GCA-G-AG-ATTAATA | CTC | -GTACC-TTTTGCATCATGAT | TTAGC CAGT--CTA  |
| Amca | AAA--GCA-A-AG-ATTAATA | CTI | -GTACC-TTTTGCATCATGAT | TTAGC CAGAC-ACAC |
| Osbi | AAA--GCA-G-AG-ATTAACA | CTC | -GTACC-TTTTGCATCATGAT | CTAGC TAGCA-TAAA |
| Pabu | AAA--GCA-G-AG-ATTTAGC | CTC | -GTACC-TTTTGCATCATGAC | TTAGC CAGAA--TAC |
| Hial | GAA--GCA-G-AG-ATTAAAC | CTC | -GTACC-TTTTGCATCATGAT | TTAGC CAGTA-AAAT |
| Elha | AAA--GCA-G-AG-ATTAAGT | CTC | -GTACC-TTTTGCATCATGAC | TTAGC TAGCA-CCAA |
| Mlcy | AAA--GCA-G-AG-ACGCAAC | CTC | -GTACC-TTTTGCATCATGAT | TTAGC TAG-A-TCAA |
| Algl | AAA--GCA-G-AG-ACTAAGT | CTC | -GTACC-TTTTGCATCATGAT | TTAGT TAGTG--TAA |
| Ptgi | AAA--GCA-G-AG-ACTAAAC | CTC | -GTACC-TTTTGCATCATGAT | TTAGC TAGTA-AGAT |
| Alaf | AAA--GCA-G-AG-ACTAAAC | CTC | -GTACC-TTTTGCATCATGAT | TTAGT AAGTA-CAA- |
| Nock | AAA--GCA-G-AG-ATTAACA | CTC | -GTACC-TTTTGCATCATGAT | TTAGC AAGTA-CAA- |
| Anja | AAA--GCA-G-AG-ACTAAAA | CTC | -GTACC-TTTTGCATCATGGT | TTAGC AAGTA-AAAA |
| Gyki | AAA--GCA-G-AG-ATTAGAC | CTC | -GTACC-TTTTGCATCATGAT | CTAGC AAGAA-A-GC |
| Syka | AAA--GCA-G-AG-CTAAACC | CTC | -GTACC-TTTTGCATCATGAT | TTAGC AAGCA-CACA |
| Opma | AAA--GCA-G-AG-ATTAATA | CTC | -GTACC-TTTTGCATCATGAT | TTAGC AAGTA-TAAC |
| Comy | AAA--GCA-G-AG-ATTAATA | CTC | -GTACC-TTTTGCATCATGAT | TTAGC AAGCA-AAAC |
| Sasp | AAT--GCA-A-AG-ACTAAAA | CTI | -GTACC-TTTTGCATCATGAT | TTAGC AAGTT-GAGT |
| Eupe | AAA--GCA-G-AG-ATTAATA | CTC | -GTACC-TTTTGCATCATGAT | TTAGC AAGTA--CAA |
| Enja | GAA--GCA-G-AG-ATCACCT | CTC | -GTACC-TTTTGCATCATGAT | TCAGC AAGTT-A-AC |
| Same | AAA--GCA-GTAG-ATTACAC | CTI | -GTACC-TTTTGCATCATGAT | CTAGC CAGTA-AT-T |
| Chch | AAA--GCA-G-AG-ATTAATA | CTC | -GTACC-TTTTGCATCATGAT | CTAGC CAGCA-TAC- |
| Grgr | AAA--GCA-G-AG-ACTAGTC | CTC | -GTACC-TTTTGCATCATGAT | TTAGC AAGC--ACCC |
| Caau | AAA--GCA-A-AG-ATTAAAC | CTI | -GTACC-TTTTGCATCATGAT | TTAGC CAGTA--CAC |
| Cyca | AAA--GCA-A-AG-ATTAAAC | CTC | -GTACC-TTTTGCATCATGAT | TTAGC CAGTA-C-AC |
| Dare | AAA--GCA-A-AG-ATTAAAC | CTI | -GTACC-TTTTGCATCATGAT | TTAGC CAACA-CC-A |
| Cost | AAA--GCA-G-AG-ATTAATG | CTC | -GTACC-TTTTGCATCATGAT | TTAGC AAGAA-ATCG |
| Leec | AAA--GCA-G-AG-CTCAAAC | CTC | -GTACC-TTTTGCATCATGAT | TTAGC CAGTA-ATAA |
| CrIa | AAA--GCA-G-AG-ACACAAC | CTC | -GTACC-TTTTGCATCATGAT | TTAGC CAGAA--CAC |
| Clmc | AAA--GCA-G-AG-ACTAACC | CTC | -GTACC-TTTTGCATCATGAT | TTAGC CAGCA-GCCG |
| Phin | AAA--GCA-G-AG-ACTAACT | CTC | -GTACC-TTTTGCATCATGAT | TTAGC CAGCA-AA-A |
| Icpu | AAA--GCA-G-AG-ACTAGAC | CTC | -GTACC-TTTTGCATCATGAT | TTAGC CAGCC-C--C |
| Psto | AAA--GCA-G-AG-ACTAAAC | CTC | -GTACC-TTTTGCATCATGAT | TTAGC TAGC--CCTT |
| Cora | AAA--GCA-G-AG-ACTAAAA | CTC | -GTACC-TTTTGCATCATGAT | TTAGC TAGT--TATT |
| Eisp | AAA--GCA-G-AG-ATACAAC | CTC | -GTACC-TTTTGCATCATGAT | TTAGC CAGCA-CC-C |
| Apal | AAA--GCA-G-AG-ACACAAC | CTC | -GTACC-TTTTGCATCATGAT | TTAGC CAGAA-CTAT |
| EsLu | AAA--GCA-G-AG-ACAGAAC | CTC | -GTACC-TTTTGCATCATGAT | TTAGC TAGTA-A-AT |
| Dape | AAA--GCA-G-AG-ATAAAAC | CTC | -GTACC-TTTTGCATCATGCT | TTAGC TAGCA--AAC |
| Glse | AAA--GCA-G-AG-ATTACCC | CTI | -GTACC-TTTTGCATCATGAT | CTAGC CAGCA--AAC |
| Naar | AAA--GCA-G-AG-ATTAACC | CTI | -GTACC-TTTTGCATCATGAT | CTAGC CAGCA-AA-C |
| Baoc | AAA--GCA-G-AG-ATTAACC | CTI | -GTACC-TTTTGCATCATGAT | CTAGC CAGCA-A-AC |
| Opso | AAA--GCA-A-AG-ATTAACC | CTI | -GTACC-TTTTGCATCATGAT | TTAGC CAGCA-AA-C |
| Alte | AAA--GCA-G-AG-ATAAAC  | CTC | -GTACC-TTTTGCATCATGAT | TTAGC CAGCA-TTAT |
| Plap | AAA--GCA-G-AG-ATCAGCC | CTC | -GTACC-TTTTGCATCATGAT | TTAGC CAGTA-CCAT |

|      |                                                               |
|------|---------------------------------------------------------------|
| Plal | AAA--GCA-A-AG-ATTAAGCTT-GTACC-TTTTGCATCATGATCTAGCCAGA--ATAC   |
| Sami | AAA--GCA-A-AG-ATTTAACTT-GTACC-TTTTGCATCATGATCTAGCCAGTA--AAC   |
| Rere | GAA--GCA-A-AG-ATTAGCTT-GTACC-TTTTGCATCATGATCTAGCCAGAA--TAC    |
| Gama | GTA--GCA-G-AG-CCTAGCTCTC-GTACC-TTTTGCATCATGATTTAGCCAGTA-TAGC  |
| Onmy | GAA--GCA-G-AG-ATTAATCTC-GTACC-TTTTGCATCATGATTTAGCCAGCA--CAC   |
| Sasa | AAA--GCA-G-AG-ATTAATCTC-GTACC-TTTTGCATCATGATTTAGCCAGCA--AAC   |
| Cola | AAA--GCA-G-AG-ATTAATCTC-GTACC-TTTTGCATCATGATTTAGCCAGCA-AAC-   |
| Dita | GAA--ACA-G-AG-ACACAACCTC-GTACC-TTTTGCATCATGGTTAGCCAGAA-A-CAC  |
| Gogr | ACA--GCA-G-AG-ATTAACCTC-GTACC-TCTTGCATCATAATTTAGCCAGCA-CA-C   |
| Chsl | AAA--ACA-G-AG-ATAAAGCTC-GTACC-TTTTGCATCATGAAATAGCCAGAA-TA-C   |
| Atja | AAA--GCA-G-AG-ATTAACACTC-GTACC-TTTTGCATCATGATTTAGCAAGTA-AT-C  |
| lido | AAA--GCA-G-AG-GCTAAACCTC-GTACC-TTTTGCATCATGATTTAGCAAGTA-AC-C  |
| Auja | AAA--GCA-G-AG-CTAAACCCTC-GTACC-TTTTGCATCATGATTAAGCAAGTA--AAT  |
| Chag | GAA--GCA-G-AG-ATTAACCTC-GTACC-TTTTGCATCATGATTAAGCCAGTA-TA-C   |
| Hami | AAA--GCA-A-AG-ACTAACACTT-GTTCC-TTTTGCATCATGATTGAGCCAGAA-AACT  |
| Saun | AAA--GCA-A-AG-ATTAATACTT-GTACC-TTTTGCATCATGATTAAGCCAGAA-AACT  |
| Nema | AAA--GCA-G-AG-ACCACCACTC-GTACC-TTTTGCATCATGACTTAGCCAGAA--TAT  |
| Disp | AAA--GCA-G-AG-ATAACCCCTC-GTACC-TTTTGCATCATGATCTAGCCAGTA-T-GC  |
| Myaf | AAA--GCA-G-AG-ATAACCCCTC-GTACC-TTTTGCATCATGATTTAGCCAGAA-CCCC  |
| Lagu | GCA--GCA-G-AG-CTATCCCCTC-GTACC-TCTTGCATCATGATCTAGCCAGTC-ATAC  |
| Trtr | ATA--GCA-G-AG-CTACACCCTC-GTACC-TTTTGCATCATGATCCAGCCAGTC--ATT  |
| Zucr | GAA--GCA-A-AG-ATAACCCCTT-GTACC-TTTTGCATCATGATCAAGCCAGTC-A-TT  |
| Pxja | AAA--GCA-G-AG-ATTAAAACTC-GTACC-TTTTGCATCATGATTTAGCCAGTA-AAAC  |
| Pxlo | AAA--GCA-G-AG-ATTAAAACTC-GTACC-TTTTGCATCATGATTTAGCCAGTA-AAAC  |
| Pctr | AAA--GCA-G-AG-ACTAGAACTC-GTACC-TTTTGCATCATGATTTAGCTAGAA-GCCC  |
| Apsa | AAA--GCA-G-AG-ACTACACCTC-GTACC-TTTTGCATCATGAAATTAACAGAA-AAAC  |
| Cabe | AAA--GCA-G-AG-ATTACACCTC-GTACC-TTTTGCATTATGATTTAGCCAGAC-AAGC  |
| Bzze | AAA--GCA-G-AG-ATCAACACTC-GTACC-TTTTGCATCATGTTTAGCCAGTA-ATAT   |
| Siim | AAA--GCA-G-AG-ATCAAGCTC-GTACC-TTTTGCATCATGATTTAGCCAGCA-ACGC   |
| Ctru | AAA--GCA-G-AG-CCTAATACTT-GTACC-TTTTGCATCATGATTTAGCCAGCA-ACAC  |
| Dpbr | AAA--GCA-G-AG-ATTAATGCTC-GTACC-TTTTGCATCATGATTTAGCCAGCA-ACAT  |
| Caki | ATA--GCA-G-AG-ATTTCCCCTC-GTACC-TTTTGCATCATGATTTAGCCAGTA--AAA  |
| Phja | GAA--GCA-A-AG-CCTATAGCTT-GTACC-TTTTGCATCATGATTTAGCCAGTA-AAAC  |
| Brsp | ATA--GAA-G-AG-ATTAACCTC-GTTCC-TCTTGCATCATGATTTAACAG-A-AACA    |
| Gamo | GCA--GCA-G-AG-TTTTCTACTC-GTACC-TTTTGCATCATGATTTAGCCAGAA-AACT  |
| Lolo | ACA--GCA-G-AG-TTTACCACTC-GTACC-TTTTGCATCATGATTTAGCCAGTA-AACT  |
| Batr | AAA--GCA-A-AG-TTAAGACCTT-GTACC-AAAAGCATAATGGAATAGCCAGTA--ACA  |
| Prmy | AAA--GCA-G-AG-ATTAACCCC-GTACC-TTTTGCATCATGGAATAGCCAGTA--TCAA  |
| Loli | AAA--GCA-G-AG-ATTCAACTC-GTACC-TTTTGCATCATGTTTAACAGCA-ACAC     |
| Loam | AAA--GCA-G-AG-ATTAACACTC-GTACC-TTTTGCATCATGTTTAGCCAGTA-ACAC   |
| Chab | AAA--GCA-G-AG-ATTTTAACTC-GTACC-TTTTGCATCATGGTTAGCCAGTA-CC-C   |
| Chto | AAA--GCA-G-AG-ATTTTAACTC-GTACC-TTTTGCATCATGGTTAGCCAGTA-CC-C   |
| Majo | AAA--GCA-G-AG-ATTAACCTC-GTACC-TTTTGCATCAGGCTTAGCCAGTA-CCTA    |
| Hlst | AAA--GCA-G-AG-AAAACCTC-GTACC-TTTTGTATCATGATTTAGCCAGTA-AA-C    |
| Clpe | AAA--GCA-G-AG-CTTTCACCTC-GTACC-TTTTGCATCATGATTTAGCCAGAA-CTCT  |
| Mlmr | GAA--GCA-G-AG-ATTTTACCTC-GTACC-TTTTGCATCATGATTTAGCCAGCA-AA-C  |
| Crcr | AAA--GCA-G-AG-CCTATCCCCTC-GTACC-TTTTGCATCATGATTTAGCCAGTA-ATAG |
| Muce | AAA--GCA-G-AG-CCTATCCCCTC-GTACC-TTTTGCATCATGATTTAGCCAGTA-ATAG |
| Bege | AAA--GCA-G-AG-CTATTTCCCTC-GTACC-TTTTGCATCATGTTTAGCCAGAG-CCCC  |
| Mela | AAA--GCA-G-AG-CTCACCCCTC-GTACC-TTTTGCATCATGTTTAGCCAGAG-CCCC   |
| Hats | AAA--GCA-G-AG-TTTTATCCTC-GTACC-TTTTGCATCATGTTTAGCCAGTA-CCAC   |
| Orla | AAA--GCA-G-AG-TTTAACCCTT-GTACC-TTTTGCATCATGAAATAGCCAGTT-TA-A  |

Cosa AAA--GCA-G-AG-ACCAAAACTC-GTACC-TTTTGCATCATGAA TTAGC CAGTA-ACCT  
 Exsp AAA--GCA-G-AG-ATTAAGCTC-GTACC-TTTTGCATCATGAA TTAGC CAGTA-ATAC  
 Depa AAA--GCA-G-AG-CTACAACCTC-GTACC-TTTTGCATCATGAA TTAAC TAGTA-AAAC  
 Rima AAA--GCA-G-AG-CTTAACCCTC-GTACC-TTTTGCATCATGCC TTAGT GAG-TT-AAC  
 Fuol AAA--GCA-G-AG-ATTAATTCTC-GTACC-TTTTGCATCATGAT TTAGC AAGT--TTAC  
 Gmaf GAA--GCA-G-AG-ACCAACCCTC-GTACC-TTTTGCATCATGAT TTAGC TAGTC-CTAG  
 Xeei AAA--GCA-G-AG-ACTAACCCTC-GTACC-TTTTGCATCATGAT TTAGC AAGT--CACT  
 Pros AAA--AGCA-G-AG-ATCCAAACTC-GTACC-TTTTGCATCATGAC TTAGC CAGTA-CTAT  
 Scmi AAA--GCA-G-AG-ATATAGCCTC-GTACC-TTTTGCATCATGAC TTAGC CAGCA-CTAT  
 Rolo AAA--GCA-G-AG-ATTTAAACTC-GTACC-TTTTGCATCATGAT TTAGC TAGTA-TCAC  
 Cere AAA--GCA-G-AG-ATTAAAACTC-GTACC-TTTTGCATCATGAA TTAGC TAG-C-ACAC  
 Daga GAA--GCA-G-AG-ATCTAAACTC-GTACC-TTTTGCATCATGAA TTAGC TAGT--CCAC  
 Anco AAA--GCA-G-AG-ATTTAACCTC-GTACC-TTTTGCATCATGAT TTAGC TAGTA-CC-C  
 Dmve AAA--GCA-G-AG-ATTTAAGCTC-GTACC-TTTTGCATCATGAT TTAGC CAG-T-ACCC  
 Dmar AAA--GCA-G-AG-AATCAAACTC-GTACC-TTTTGCATCATGAT TTAGC TAGTA-CCCC  
 Anka AAA--GCA-G-AG-ATTCAAACTC-GTACC-TTTTGCATCATGAT TTAGC TAGTA-CC-C  
 Moja AAA--GCA-G-AG-ATTCAAACTC-GTACC-TTTTGCATCATGAT TTAGC TAGTA-CCAC  
 Hoja AAA--GCA-G-AG-ATTTAAACTC-GTACC-TTTTGCATCATGAT TTAGC TAGTA--CCC  
 Bede AAA--GCA-G-AG-ATCTAAACTC-GTACC-TTTTGCATCATGAC TTAGC CAGTA-CTAT  
 Bosp AAA--GCA-G-AG-ATTTAAACTC-GTACC-TTTTGCATCATGAC TTAGC CAGTA-CTAT  
 Mysp AAA--GTA-G-AG-ATTTAAACTC-GTACC-TTTTGCATCATGTT TTAGC CAGCA-AAAC  
 Osja GAA--GTA-A-AG-ATTTAAACTT-GTACC-TTTTGCATCATGTT TTAGC CAGCA-CCCC  
 Sgro AAA--GCA-G-AG-ATTAACACTC-GTACC-TTTTGCATCATGTT TTAGC CAGTA-CTAC  
 Pzpa ATA--GCA-G-AG-CTTTACCCTC-GTACC-TTTTGCATCATGAT TTAGC AAGCA-AAAC  
 Zeja ATA--GCA-G-AG-ACTCCCCTC-GTACC-TTTTGCATCATGAT TTAGC AAGTA-AAGC  
 Znne ATA--GCA-G-AG-ATTTCCCCTC-GTACC-TTTTGCATCATGAT TTAGC AAGTA-AAGC  
 Zefa ATA--GCA-G-AG-ACCCACCCTC-GTACC-TTTTGCATCATGAT TTAGC AAGTA-AGAC  
 Acni ATA--GCA-G-AG-ACCCCAACTC-GTACC-TTTTGCATCATGAT TTAGC AAGTA-AAAC  
 Ncrh ATA--GCA-G-AG-ACCCCAACTC-GTACC-TTTTGCATCATGAT TTAGC AAGTA-AGAC  
 Agca AAA--GCA-G-AG-CTTCCACCCTC-GTACC-TTTTGCATCATGAT TTAGC CAGTA-TCC-  
 Hydy AAA--GCA-G-AG-ATTATAACTC-GTACC-TTTTGCATCATGAT TTAGC AAGTG-TAAC  
 Gsac GAA--GCA-G-AG-ATTTAACCTC-GTACC-TTTTGCATCATGAT TTAGC AAGTG-TAAC  
 Pevo AAA--GCA-G-AG-ATTCCCCCTC-GTACC-TTTTGCATCATGAA TCAGC CAGTA-AAC-  
 Hiku ATA--GCA-A-AG-ATTAATCTT-GTACC-TTTTGCATCATGGT TTAAC AAGA--TACC  
 Inpa AAA--GCA-G-AG-ACTAAAACTC-GTACC-TTTTGCATCATGAT TTAGC AAGCA-C-CT  
 Auch AAA--GCA-A-AG-CTTAAGCTT-GTACC-TTTTGCATCATGGT CTAGC CAGCA-TTAC  
 Fico AAA--GCA-G-AG-ATTACCCTC-GTACC-TTTTGCATCATGAT TTAGC CAGAA-CAAC  
 Macs AAA--GCA-G-AG-AATAAACCTC-GTACC-TTTTGCATCATGAT TTAGC TAGAA-CAAC  
 Moal AAA--GCA-G-AG-ACTCATCCTC-GTACC-TTTTGCATCATGAA TTAGT TAGAC-ACC-  
 Syma AAA--GCA-G-AG-ATTATACCTC-GTACC-TTTTGCATCATGAT TTAGC AAGCC-CCC-  
 Mafr AAA--GCA-G-AG-ACTTAAACTC-GTACC-TTTTGCATCATGAT TTAGC AAGTA--CCC  
 Dcpe AAA--GCA-G-AG-ATTATTACTC-GTACC-TTTTGCATCATGAT TTAGC CAGTA-CCCC  
 Dcti GAA--GCA-G-AG-TTTATTGCTC-GTACC-TTTTGCATCATGAT TTAGC CAGTA-CCTC  
 Hehi AAA--GCA-G-AG-ATTTACCCTC-GTACC-TTTTGCATCATGAT TTAGC TAGCG-TGAC  
 Stam AAA--GCA-G-AG-GCTAACCTC-GTACC-TTTTGCATCATGAT TTAGC CAGTG-TTGA  
 Hogi AAA--GCA-G-AG-ATTAACCCTC-GTACC-TTTTGCATCATGAT TTAGC CAGTG-TAAC  
 Erzo GAA--GCA-G-AG-ATTAAGCTC-GTACC-TTTTGCATCATGAT TTAGT GAGTG-TACA  
 Hxot AAA--GCA-G-AG-ATCTAAACTC-GTACC-TTTTGCATCATGAT TTAGC AAGTG-TAAC  
 Core AAA--GCA-G-AG-ATTAAGCTC-GTACC-TTTTGCATCATGAT TTAGC AAGTG-TACC  
 Apve AAA--GCA-G-AG-ATAAAACCTC-GTACC-TTTTGCATCATGAT TTAGC AAGTG-TACA  
 Latj AAA--GCA-G-AG-ATTAGACCTC-GTACC-TTTTGCATCATGAC TTAGC TAGTA-CC-C  
 Laja AAA--GCA-G-AG-ATTTAAACTC-GTACC-TTTTGCATCATGAT TTAGC TAGTA-AACC

Syja AAA--GCA-G-AG-ACTTTACCTC-GTACC-TTTTGCATCATGATTTAGCAAGTA-ATCT  
 Epme AAA--GCA-G-AG-ACATTACCTC-GTACC-TTTTGCATCATGATTTAGCAAGTG-CAAC  
 Grse GAA--GCA-G-AG-ATTTACCTC-GTACC-TTTTGCATCATGATTTAGCAAGAG-AAAA  
 Clja AAA--GCA-G-AG-ACTAAACCTC-GTACC-TTTTGCATCATGATTTAGCAAGT-A-AAA  
 Ogcy AAA--GCA-G-AG-ACCCACCCTC-GTACC-TTTTGCATCATGATTTAGCAAGTA-ACCC  
 Plna AAA--GCA-G-AG-ACTAACCCTC-GTACC-TTTTGCATCATGCTTTAGCAAGTA-CTAA  
 Lema AAA--GCA-G-AG-ATTTTTCTC-GTACC-TTTTGCATCATGATTTAGCAAGAAATTAC  
 Etzo AAA--GCA-G-AG-ATATAACCTC-GTACC-TTTTGCATCATGATTTAGCAAGCG-TAAC  
 Apse AAA--GTA-G-AG-TTTAATCTC-GTACC-TTTTGCATCATGATTTAGCAAGTA-GCAG  
 Epde AAA--GCA-G-AG-ATTATAGCTC-GTACC-TTTTGCATCATGATTTAGCAAGTA-AAAT  
 Slja ACA--GCA-G-AG-ATTCTCCCTC-GTACC-TTTTGCATCATGATTTAGCATAGTA-AACC  
 Bsja AAA--GCA-G-AG-ATTCCAACTT-GTACC-TTTTGCATCATGATTTAGCAAGTA-AACC  
 Ecna AAA--GCA-G-AG-ATATAACCCTC-GTACC-TTTTGCATCATGAACTAGCAAGTA-AA-A  
 Cohi AAA--GCA-G-AG-ATTACCCCTC-GTACC-TTTTGCATCATGATTTAGCATAG-C-AACA  
 Caar AAA--GCA-G-AG-ATTTTCCCTC-GTACC-TTTTGCATCATGATTTAGCAAGTA-C-CT  
 Came AAA--GCA-G-AG-ATTACTCTC-GTACC-TTTTGCATCATGATTTAGCAAGCA--CAT  
 Mema AAA--GCA-G-AG-ATTAACCCTC-GTACC-TTTTGCATCATGATTTAGCAAGCA--CCC  
 Lenu AAA--GCA-A-AG-ATTAATCTT-GTACC-TTTTGCATCATGATTTAGCATAGCA--TAA  
 Brja AAA--GCA-G-AG-ATCCCCCTC-GTACC-TTTTGCATCATGATTTAGCAAGTA-CCCC  
 Plma AAA--GCA-G-AG-ATTTAACCTC-GTACC-TTTTGCATCATGATTTAGCAAGTA-ATAC  
 Emst AAA--GCA-G-AG-ATTTTAACTC-GTACC-TTTTGCATCATGATTTAGCAAGAA-AAAT  
 Ptti AAA--GCA-G-AG-ATATAGCTC-GTACC-TTTTGCATCATGACTTAGCAAGTA--ACC  
 Losu AAA--GCA-G-AG-ATTAACACTC-GTACC-TTTTGCATCATGATTTAGCAAGTA-AAAC  
 Geoy AAA--GCA-G-AG-ACTCACCCTC-GTACC-TTTTGCATCATGATTTAGCAAGTA-ACCA  
 Dipi AAA--GCA-G-AG-ATTTTAACTC-GTACC-TTTTGCATCATGATTTAGCAAGTA-CA-C  
 Pama AAA--GCA-G-AG-ATCAAAACTC-GTACC-TTTTGCATCATGATTTAGCAAGTA-AC-C  
 Leob AAA--GCA-G-AG-ATAATTCCTC-GTACC-TTTTGCATCATGATTTAGCAAGTA-CC-C  
 Neba AAA--GCA-G-AG-ATTCGCCCTC-GTACC-TTTTGCATCATGATTTAGCAAGTA-ACAC  
 Pdpi AAA--GCA-G-AG-ATAAACCTT-GTACC-TTTTGCATCATGATTTAGCATAGTA-CAA-  
 Nimi AAA--GCA-G-AG-ATTTACACTC-GTACC-TTTTGCATCATGAGTTAGCAAGAA-AATC  
 Uptr AAA--GCA-G-AG-ATTAAAACTC-GTACC-TTTTGCATCAGGCTTAGCATAGTA-CCCA  
 Pesc AAA--GCA-G-AG-CTACCCCCTC-GTACC-TTTTGCATCATGAACTAGCAAGTA-CTAC  
 Baar AAA--GCA-G-AG-ATTTCAACTC-GTACC-TTTTGCATCATGATTTAGCAAGCA-AAAC  
 Moar AAA--GCA-G-AG-ATTTTAACTC-GTACC-TTTTGCATCATGATTTAGCAAGAA-AAAG  
 Toja AAA--GCA-G-AG-ATCAAAACTC-GTACC-TTTTGCATCATGATTTAGCAAG-A-ACAT  
 Chau AAA--GCA-G-AG-ATTTAAACTC-GTACC-TTTTGCATCATGATACAGCAAGAA-AACT  
 Chse AAA--GCA-G-AG-ATTCTAGCTC-GTACC-TTTTGCATCATGAACTAGCAAGTA-AAGT  
 Enar AAA--GCA-G-AG-ATTTTTACTC-GTACC-TTTTGCATCATGTTTAGCATAG-A-CAAC  
 Hpty GAA--GCA-G-AG-ATTTTAGCTC-GTACC-TTTTGCATCATGATTTGGCTAGCA-ATAC  
 Nana AAA--GCA-G-AG-ATTTGAGCTC-GTACC-TTTTGCATCATGATTTAGCAAGCA-AA-T  
 Mcst AAA--GCA-G-AG-ATTCAGGCTC-GTACC-TTTTGCATCATGATTTAGCAAGAA-CTAT  
 Rhox AAA--GCA-G-AG-ATTC AACCTC-GTACC-TTTTGCATCATGATTTAGCAAGTA-ACCC  
 Opfa AAA--GCA-G-AG-ATTC AACCTC-GTACC-TTTTGCATCATGATTTAGTATAGTA-ATAA  
 Paar AAA--GCA-G-AG-ACTTCACCTC-GTACC-TTTTGCATCATGACTAGCAAGAA-ACCC  
 Gozo AAA--GCA-G-AG-ATTCTAACCTC-GTACC-TTTTGCATCATGATTTAACATAGAA-TACC  
 Ackr AAA--GCA-G-AG-ACCCTC-CTC-GTACC-TTTTGCATCATGATTTAGCAAGTA-AA-C  
 Elev AAA--GCA-G-AG-CATAGTGCTC-GTACC-TTTTGCATCATGTTTAGCATAGAA-ATAT  
 Trdu AAA--GCA-G-AG-ATTTCCCCTC-GTACC-TTTTGCATCATGATTTAGCAAGAA-AGCC  
 Amoc AAA--GCA-G-AG-ACACAACCCTC-GTACC-TTTTGCATCATGATTTAGCATAGTA-TACC  
 Hame AAA--GCA-A-AG-ACTAACCCTT-GTACC-TCTTGCATCATGATTTAGCATAGCA-ATAA  
 Chso AAA--GCA-G-AG-ATTA AAGCTC-GTACC-TTTTGCATCATGAACTAGCAGAGA--ATAA  
 Lyto AAA--GCA-G-AG-ATTA AAGCTC-GTACC-TTTTGCATCATGATTTAGCAAGTG-TAAC



|      |                                                               |
|------|---------------------------------------------------------------|
| Encr | AAA--GCA-G-AG-ATCAAAACTC-GTACC-TTTTGCATCATGATTTAGCAAGTG-TAAC  |
| Bvar | GAA--GCA-G-AG-ATAAAACCTC-GTACC-TTTTGCATCATGATCTAGCTAGTG-AAAC  |
| Noco | AAA--GCA-G-AG-TTAAACCCTC-GTACC-TTTTGCATCATGATTTAGCCAGTG-ATTT  |
| Chsp | AAA--GCA-G-GC-ATAACCCCCC-GTACC-TTTTGCATCATGAAATTAATGAGAA-CACT |
| Arja | AAA--GCA-G-AG-ATTATGCCTC-GTACC-TTTTGCATCATGATTTAGCAAGTG-TACC  |
| Pase | AAA--GCA-G-AG-ATACACTCTC-GTACC-TTTTGCATCATGATTCAGCAAGCA-ACCA  |
| Trel | AAA--GCA-G-AG-AGCC--TCTC-GTACC-TTTTGCATCATGATTTAGCCAGAA-CAAG  |
| Lifa | AAA--GCA-G-AG-ATGAAACCTC-GTACC-TTTTGCATCATGATTTAGCTAG-A-ACGA  |
| Acur | GAA--GCA-A-AG-TTTAAGCCTT-GTACC-TTTTGCATCATGGTTAGCAAGAA-ATAT   |
| Ampe | AAA--GCA-G-AG-ATTTAAACCTC-GTACC-TTTTGCATCATGATTTAGCTAGAA-AGCC |
| Urja | AAA--GCA-A-AG-ACTAACTCTT-GTACC-TTTTGCATCATGATTTAGCCAGCA-CC-C  |
| Enet | AAA--GCA-A-AG-ATCAGCCCTT-GTACC-TTTTGCATCATGAAATAGCCAGAAAATTA  |
| Ptbr | AAA--GCA-A-AG-ATTAATCTT-GTACC-TTTTGCATCATGGTTAGCTAGTC-AGAA    |
| Safa | AAA--GCA-G-AG-ACTTACTCTC-GTACC-TTTTGCATCATGATTTAGCGAGCC-ATCT  |
| Icae | AAA--GCA-G-AG-ATTTTACTC-GTACC-TTTTGCATCATGATTTAGCTAGTA-CTTC   |
| Asmi | AAA--ACA-G-AG-ATTTATCCTC-GTACC-TTTTGCATCATGATTTAGTGAGCA--T-C  |
| Foal | AAA--GCA-G-AG-CTTAGTCTT-GTACC-TTTTGCATCATGGTTAGTGAGCG-TAAA    |
| Drze | AAA--GCA-G-AG-ACTAATCCTC-GTACC-TTTTGCATCATGATTTAGCAAGCA-ATAT  |
| Rhas | AAA--GCA-G-AG-ATTAATACTC-GTACC-TTTTGCATCATGACTAGCCAGCA-AACC   |
| Elac | AAA--GCA-G-AG-CTTAAGCCTC-GTACC-TTTTGCATCATGACTAGCCAGTA-AGCC   |
| Kugu | AAA--GTA-G-AG-ACCAAACCTC-GTACC-TTTTGCATCATGATTTAGCCAGTA-ACCC  |
| Plor | AAA--GCA-G-AG-ATCACACCTC-GTACC-TTTTGCATCATGATTTAGCTAGAAAAC-C  |
| Sgun | AAA--GCA-G-AG-AT-ACCCCTCGTACC-TTTTGCATCATGATTTAGCTAGAA-AGCC   |
| Zaco | GAA--GCA-G-AG-ATTAGAACCTC-GTACC-TTTTGCATCATGATTTAGCCAGTA-CTCA |
| Zbfl | AAA--GTA-G-AG-ATTC AACCTC-GTACC-TTTTGCATCATGATTTAGCTAGAA-AAGT |
| Spba | AAA--GCA-G-AG-ATTTAACCTC-GTACC-TTTTGCATCATGATTTAGCCAGTA--TCC  |
| Game | AAA--GCA-G-AG-ATTACACCTC-GTACC-TTTTGCATCATGATTTAGCTAGTA-TTAC  |
| Thth | AAA--GCA-G-AG-ATTTTACTC-GTACC-TTTTGCATCATGATTTAGCTAGTA-CTAT   |
| Xigl | AAA--GCA-G-AG-ATTTGACCTC-GTACC-TTTTGCATCATGATTTAGCCAGCA-CC-C  |
| Hyja | AAA--GCA-G-AG-ATTTTACCTC-GTACC-TTTTGCATCATGATTTAGCTAGTA-CCCC  |
| Psan | AAA--GCA-G-AG-ATAATACCTC-GTACC-TTTTGCATCATGATTCAGCTAGTA-ATTC  |
| Cupa | AAA--GCA-G-AG-ATTTTACTC-GTACC-TTTTGCATCATGATTTAGCTAGTA-TTAC   |
| Mpch | AAA--GCA-G-AG-ACTAATCCTC-GTACC-TTTTGCATCATGATTTAGCTAGAA-AATT  |
| Char | AAA--GCA-G-AG-ATTAACCCTC-GTACC-TTTTGCATCATGATTTAGCCAGTA--AGC  |
| Pser | AAA--GCA-G-AG-ATTACCTCTT-GTACC-TTTTGCATCATGATTTAGCCAG-A-AACC  |
| Prol | AAA--GCA-G-AG-ATTAGAACCTC-GTACC-TTTTGCATCATGATTTAGCTAGCA-CT-T |
| Plbi | GAA--GCA-G-AG-CTTAAAGCTC-GTACC-TTTTGCATCATGATTTAGCTAGC--ACTT  |
| Calu | ACA--GCA-G-AG-CTTACCCCTC-GTACC-TTTTGCATCATGATTTAGCTAGTA--TAC  |
| Papa | AAA--GCA-G-AG-ACTAACCCTC-GTACC-TTTTGCATCATGATTTAGCAAGTA-TA-A  |
| Sufr | AAA--GCA-G-AG-ATCTACCCTC-GTACC-TTTTGCATCATGATTTAGCCAGTA--CCC  |
| Stci | TAA--GCA-G-AG-ATTACACCTC-GTACC-TTTTGCATCATGATTTAGCTAGCA-CCTC  |
| Taru | AAA--GCA-G-AG-ATTACACCTC-GTACC-TTTTGCATCATGATTTAGCTAGTA--TAA  |
| Rala | AAA--GCA-G-AG-ATGAAACCTC-GTACC-TTTTGCATCATGATTTAGCTAGTA--TTC  |

\*

\* \*\*

\* \*\* \*



Plal TCAGGC AAAGAGAAC - TTTA GTTTG AGCC CC CGAAA CTGC - AC --- GAG CTACTC CGAGA - C  
 Sami CCAGGC AAAGAGAGC - TTTA GTCTG GGCC CC CGAAA CTGC - AC --- GAG CTACTC CGAGA - C  
 Rere TCAAGC GAAGAGCAC - TTTA GTTTG AGCC CC CGAAA CTGC - AC --- GAG CTACTC CGAGA - C  
 Gama TCAGGC GAAGTGAAC - TTTA GTCTT AGCC CC CGAAA CTGC - AC --- GAG CTACTC CGAGG - C  
 Onmy CTGAGC AAAGAGAAC - TTTA GTTTA GGCC CC CGAAA CTAG - AC --- GAG CTACTC CGGA - C  
 Sasa CCGAGC AAAGAGAAC - TTTA GTTCA GGCC CC CGAAA CTAG - AC --- GAG CTACTC CGGA - C  
 Cola CCGAGC AAAGAGAAC - TTTA GTTCA GGCC CC CGAAA CTAG - AC --- GAG CTACTC CGGA - C  
 Dita CCAGGC AAGAGAAC - TTTA GTCCG GACC CC CGAAA CTAG - GT --- GAG CTACTC CGAGG - C  
 Gogr TCAAGC AAAAGAAC - TTTA GTTTG AACC CC CGAAA CTAG - AC --- GAG CTACTC CGAAA - C  
 Chsl TTAAGC AAAGAGAGC - TTTA GTTTA AGCC CC CGAAA CTAG - AC --- GAG CTACTC CGAGA - C  
 Atja TTAGGC AAAGAGAAC - TTTA GTCTA AGCC CC CGAAA CTAG - AC --- GAG CTACTC CAAGA - C  
 lido TTAGGC AAAGAGAAC - TTTA GTCTA AGCC CC CGAAA CTAG - AC --- GAG CTACTC CAGGA - C  
 Auja TAAAGC AAAGAGGCC - TTTA GTTTT ATTT CC CGAAA CTAA - AC --- GAG CTACTC CGAGA - C  
 Chag TAAAGC GAAGCGCC - TTTA GTTTT ATAC CC CGAAA CTAG - AC --- GAG CTACTC CGAGA - C  
 Hami TAAAGC AAAGCGCC - TTTA GTTTT ACTT CC CGAAA CCAG - AC --- GAG CTACTC CGAGA - C  
 Saun TAAAGC AAAGCGCC - TTTA GTTTT ACCC CC CGAAA CCAG - AC --- GAG CTACTC CGAGAA - C  
 Nema CTGAGC AAAGAGACC - TTTA GTACA GACC CC CGAAA CTAG - AC --- GAG CTACTT CAAGA - C  
 Disp CTGAGC AAAGTGAAC - TTTA GTTCA GTCC CC CGAAA CTAG - AC --- GAG CTACTT CAAGA - C  
 Myaf CTGAGC AAAGTGAAC - TTTA GTTCA GCCC CC CGAAA CTAG - AC --- GAG CTACTT CAAGG - C  
 Lagu TCAGGC AAAGTGACC - TTTA GTCTG ATTT CC CGAAA CTAG - AC --- GAG CTACTT CAAGA - C  
 Trtr GCAGGC AAAGAGTGC - TTTA GTCTG ACCC CC CGAAC CCAG - GT --- GAG CTACTT CGAGG - C  
 Zucr CCAGGC ACAGAGCAC - TGTA GTCTG ACA - CC CGAAA CCAA - GT --- GAG CTACTC CGAGG - C  
 Pxja TCAAGC ACAGTGCC - TTTA GTTTG ATAC CC CGAAA CTGA - GC --- GAG CTACTT CAAGA - C  
 Pxlo TCAAGC ACAGTGCC - TTTA GTTTG ATAC CC CGAAA CTGA - GC --- GAG CTACTT CAAGA - C  
 Pctr TCAGGC AAAGTGCC - TGTA GTCTG GACC CC CGAAA CTGA - GC --- GAG CTACTC CAAGA - T  
 Apsa TCAAGC AAAGCGACC - TAAA GTTTG AGAC CC CGAAA CTGA - GC --- GAG CTACTC CAAGA - C  
 Cabe TTAGGC AGAGAGCTC - TGCA GTCTA AGAC CC CGAAA CCGG - GT --- GAG CTACTC CGGA - C  
 Bzze TCAAGC AAAGAGAAC - TATA GTTTG ACAC CC CGAAA CTAG - GT --- GAG CTACTC CAAGG - C  
 Siim CCAAGC AGAAAGAA - TATA GTTTG GTTC CC CGAAA CTAA - GT --- GAG CTACTC CGAGG - C  
 Ctru ACAAAC AAAGAGGCC - TTTA GTTTG GTCC CC CGAAA CTAG - AT --- GAG CTACTC CAAGA - C  
 Dpbr ATAAAC AAAGAGGCC - TTTA GTTTA ATGC CC CGAAA CTAG - AT --- GAG CTACTC CGAGA - C  
 Caki CCAAGC AAAGAGGCC - TTTA GTTTG TTAC CC CGAAA CTGT - GC --- GAG CTACTT CAAGA - C  
 Phja ACAAGC AAAGAGGCC - TTTA GTTTG TGAC CC CGAAA CTGA - GC --- GAG CTACTT CAAGA - C  
 Brsp CCAAGC AAAGTGACC - TTTA GTTTG CTAC CC CGAAA CTGC - GC --- GAG CTACTC CGAGA - C  
 Gamo ACAAGC AAAGAGGCC - TTTA GTTTG TAAC CC CGAAA CTGA - GC --- GAG CTACTC CAAGA - C  
 Lolo ACAAGC AAAGAGGCC - TTTA GTTTG TAAC CC CGAAA CTGA - GC --- GAG CTACTC CAAGA - C  
 Batr ATAAGC AAAAAAAAAAC - TTTA GTTTA TATC CC CGAAA CTAG - TT --- GAG CTACTT GTCC - C  
 Prmy AAGAGC ACAGCCTC - TTTA GTTCT ATCC CC CGAAA CTGT - AC --- GAG CTACTT CAGCC - C  
 Loli CCAAGC AAAGTGCC - TTTA GTTTG GGCC CC CGAAA CTAA - GC --- GAG CTACTC CAAGA - C  
 Loam CCAAGC AAAGAGGCC - TTTA GTTTG GACC CC CGAAA CTAA - GC --- GAG CTACTC CAAGA - C  
 Chab CCAAGC GAAGAGGCC - TACA GTTTG AACC CC CGAAA CTAA - GC --- GAG CTACTC CAAGA - C  
 Chto CCAAGC GAAGAGGCC - TACA GTTTG AACC CC CGAAA CTAA - GC --- GAG CTACTC CAAGA - C  
 Majo TCAAGC AAAAGGAAT - TTTA GTTTG AGAC CC CGAAA CCAA - GT --- GAG CTACTC CAAGA - C  
 Hlst ACAGGC AAAGAGGCC - TTTA GTCTG GAAC CC CGAAA CTAA - GA --- GAG CTACTC CAAGA - C  
 Clpe CCAAGC AAAGAGGCC - TTTA GTTTG ACCC CC CGAAA CTAG - AC --- GAG CTACTC CAAGA - C  
 Mlmr CCAAGC AAAGAGGCC - TTCA GTTTG AGCC CC CGAAA CTAA - GC --- GAG CTACTC CAAGA - C  
 Cr cr TCAAGC AAAAGCAT - TTTA GTTTG ACCC CC CGAAA CCAA - GT --- GAG CTACTC CAAGA - C  
 Muce TCAAGC AAAAGCAT - TTTA GTTTG ACCC CC CGAAA CCAA - GT --- GAG CTACTC CAAGA - C  
 Bege TCAAGC AAAAGCAT - TTTA GTTTG ACTA CC CGAAA CCAG - AC --- GAG CTACTT CAAGA - T  
 Mela TCAAGC AAAAGCAT - TGTA GTTTG ACAA CC CGAAA CTAA - GC --- GAG CTACTC CAGC - C  
 Hats TCAAGC AAAAGCAT - TTTA GTTTG AATA CC CGAAA CTAG - GC --- GAG CTACTC CAAGA - C  
 Or la TCAAGC AAAAGAAC - TGTA GTTTG AAAC CC CGAAA CTTA - GT --- GAG CTACTT CAAGA - C

Cosa TTAAGCAAATGAAT-TTTAGTTTAAACC<sup>CC</sup>CGAAA<sup>CTAA</sup>-GT---GAG<sup>CTACTC</sup>CAAGA-C  
 Exsp TTAAGCAAATGAAT-TTTAGTTTAACTT<sup>CC</sup>CGAAA<sup>CTAG</sup>-GT---GAG<sup>CTACTC</sup>CAAGG-C  
 Depa CTAAGCAAAGATT-TTTAGTTTAGTAC<sup>CC</sup>CGAAA<sup>CTAA</sup>-GT---GAG<sup>CTACTT</sup>CAAGA-C  
 Rima TTAAGCAAAGTTI-T-TAGTTTAAACC<sup>CC</sup>CGAAA<sup>CTGG</sup>-GT---GAG<sup>CTACTC</sup>CAAGA-C  
 Fuol TCAAGCAAAGCAT-TTTAGTTTATAT<sup>CC</sup>CGAAA<sup>CTAG</sup>-AC---GAG<sup>CTACTC</sup>CAAGG-C  
 Gmaf TTAAGCAAAGATT-TTTAGTTTACAT<sup>CC</sup>CGAAA<sup>CTAG</sup>-AC---GAG<sup>CTACTC</sup>CAAGG-C  
 Xeei CCAAGCAAAGCCT-TTTAGTTTACTT<sup>CC</sup>CGAAA<sup>CTAG</sup>-AC---GAG<sup>CTACTC</sup>CAAGA-C  
 Pros TCGAGCACAGCGTC-TTTAGTTTACAC<sup>CC</sup>CGAAA<sup>CTAG</sup>-AC---GAG<sup>CTACTC</sup>CAAGG-C  
 Scmi TCGAGCACAGCGTTC-TTTAGTTTACAC<sup>CC</sup>CGAAA<sup>CTAG</sup>-AC---GAG<sup>CTACTC</sup>CAAGA-C  
 Rolo CCGAGCAAAGAGCCC-TTTAGTTTGCAC<sup>CC</sup>CGAAA<sup>CTGG</sup>-AC---GAG<sup>CTACTC</sup>CAAGA-C  
 Cere CCAAGCAAAGAGCCC-TTTAGTTTGTAT<sup>CC</sup>CGAAA<sup>CTGG</sup>AGC---GAG<sup>CTACTT</sup>CAAGA-C  
 Daga CCAAGCAAAGAGCCC-TTTAGTTTACAC<sup>CC</sup>CGAAA<sup>CTGA</sup>GGC---GAG<sup>CTACTT</sup>CAAGA-C  
 Anco TTAAGCAAAGAGCCC-TTTAGTTTACAC<sup>CC</sup>CGAAA<sup>CTGA</sup>-GC---GAG<sup>CTACTC</sup>CAAGA-C  
 Dmve CTAAGCAAAGAGCCC-TTTAGTTTAGCAC<sup>CC</sup>CGAAA<sup>CTGA</sup>-CA---GAG<sup>CTACTC</sup>CAAGC-C  
 Dmar CTAAGCAAAGAGCCC-TTTAGTTTAGCCC<sup>CC</sup>CGAAA<sup>CTGA</sup>-GC---GAG<sup>CTACTC</sup>CAAGA-C  
 Anka TTAAGCAAAGAGCCC-TTTAGTTTACAC<sup>CC</sup>CGAAA<sup>CCGG</sup>-GC---GAG<sup>CTACTC</sup>CAAGA-C  
 Moja TTAAGCAAAGAGCCC-TTTAGTTTATAC<sup>CC</sup>CGAAA<sup>CTGA</sup>-GC---GAG<sup>CTACTC</sup>CAAGA-C  
 Hoja TTAAGCAAAGAGCCC-TTTAGTTTATAC<sup>CC</sup>CGAAA<sup>CTGA</sup>-GC---GAG<sup>CTACTC</sup>CAAGA-C  
 Bede TCGAGCACAGGTTT-TTTAGTTTACAC<sup>CC</sup>CGAAA<sup>CTAG</sup>-AC---GAG<sup>CTACTC</sup>CAAGA-C  
 Bosp TCGAGCATAGAGTTC-TTTAGTTTACAC<sup>CC</sup>CGAAA<sup>CTAG</sup>-AC---GAG<sup>CTACTC</sup>CAAGG-C  
 Mysp TCAAGCAAAGAGCCC-TTTAGTTTAAAC<sup>CC</sup>CGAAA<sup>CTGG</sup>-AC---GAG<sup>CTACTC</sup>CAAGG-C  
 Osja CCAAGCAAAGAGCCC-TTTAGTTTACAC<sup>CC</sup>CGAAA<sup>CTGG</sup>-AC---GAG<sup>CTACTC</sup>CAAGA-C  
 Sgro TCAAGCAAAGAGCCC-TTTAGTTTATAC<sup>CC</sup>CGAAA<sup>CTGG</sup>-AC---GAG<sup>CTACTC</sup>CAAGA-C  
 Pzpa CCAAGCAAAGAGACC-TATAGTTTAGAC<sup>CC</sup>CGAAA<sup>CTAA</sup>-GC---GAG<sup>CTACTC</sup>CAAGA-C  
 Zeja CCAAGCAAAGAGCCC-TATAGTTTAGAC<sup>CC</sup>CGAAA<sup>CTTA</sup>AGC---GAG<sup>CTACTC</sup>CAAGA-C  
 Znne TCAAGCAAAGAGACC-TGTAGTTTAGAC<sup>CC</sup>CGAAA<sup>CTAA</sup>-GC---GAG<sup>CTACTC</sup>CAAGA-C  
 Zefa CCAAGCAAAGCGACC-TGTAGTTTAGAC<sup>CC</sup>CGAAA<sup>CTAA</sup>-GC---GAG<sup>CTACTC</sup>CAAGA-C  
 Acni CCAAGCAAAGAGACC-TATAGTTTGAAC<sup>CC</sup>CGAAA<sup>CTAA</sup>-GC---GAG<sup>CTACTC</sup>CAAGA-C  
 Ncrh CCAAGCAAAGAGACC-TATAGTTTGAAC<sup>CC</sup>CGAAA<sup>CTAA</sup>-GC---GAG<sup>CTACTC</sup>CAAGA-C  
 Agca TCAAGCAAAGAGCAC-TTTAGTTTACAC<sup>CC</sup>CGAAA<sup>CTAA</sup>-GT---GAG<sup>CTACTC</sup>CAAGA-C  
 Hydy TTAAGCAAAGAGAAC-TTTAGTTTACAT<sup>CC</sup>CGAAA<sup>CTAC</sup>-GT---GAG<sup>CTACTC</sup>CAAGA-C  
 Gsac TTAAGCAAAGAGACC-TATAGTTTATGC<sup>CC</sup>CGAAA<sup>CTAC</sup>-GT---GAG<sup>CTACTC</sup>CAAGA-C  
 Pevo CCTAGCAAAGAGCCC-TTTAGTTTAAAC<sup>CC</sup>CGAAA<sup>CCGA</sup>-GT---GAG<sup>CTACTC</sup>CAAGA-C  
 Hiku TCAAGCAAAGAGATC-TTTAGTTTCTAC<sup>CC</sup>CGAAA<sup>CTAA</sup>-GC---GAG<sup>CTACTC</sup>CGAGA-C  
 Inpa CTAAGCAAAGAGCCC-TCTAGTTTAAAC<sup>CC</sup>CGAAA<sup>CCAA</sup>-GT---GAG<sup>CTACTC</sup>CAAGA-C  
 Auch TTAGCAAAGCGCAC-TTTAGTCTAAGCC<sup>CC</sup>CGAAA<sup>CCAG</sup>-GT---GAG<sup>CTACTT</sup>CAAGA-C  
 Fico TCAAGCAAAGAGAAT-TGTAGTTTATAC<sup>CC</sup>CGAAA<sup>CTAC</sup>-GT---GAG<sup>CTACTT</sup>CAAGG-C  
 Macs CTAAGCAAAGAGCAC-TTTAGTTTAGGAC<sup>CC</sup>CGAAA<sup>CCAG</sup>-GC---GAG<sup>CTACTC</sup>CAAGA-C  
 Moal CCAAGCAAAGAGACC-TATAGTTTGTTC<sup>CC</sup>CGAAA<sup>CTAA</sup>-GT---GAG<sup>CTACTC</sup>CGAGA-C  
 Syma TCAAGCAAACGTCCTTTAAGTTTACAC<sup>CC</sup>CGAAA<sup>CTAC</sup>-GT---GAG<sup>CTACTC</sup>CAAGA-C  
 Maf r CTAAGCAAAGAGAAC-TTTAGTTTAAAC<sup>CC</sup>CGAAA<sup>CCAA</sup>-GT---GAG<sup>CTACTC</sup>CAAGA-C  
 Dcpe TCTAGCAAAGAGAAC-TTTAGTTTAGGCC<sup>CC</sup>CGAAA<sup>CCAA</sup>-GT---GAG<sup>CTACTC</sup>CAAGG-C  
 Dct i TCTAGCGTAGAGAAC-TTTAGTTTAGAAC<sup>CC</sup>CGAAA<sup>CCAA</sup>-GT---GAG<sup>CTACTC</sup>CAAGG-C  
 Hehi CCAAGCAAAGAGTGC-TTTAGTTTACAC<sup>CC</sup>CGAAA<sup>CTAG</sup>-GC---GAG<sup>CTACTC</sup>CAAGA-C  
 Stam CCAAGCAAATGAAT-TTTAGTTTACAG<sup>CC</sup>CGAAA<sup>CTAA</sup>-GT---GAG<sup>CTACTC</sup>CAAGA-C  
 Hogi TCAGCAAAGAGCAC-TTTAGTCTGTTTA<sup>CC</sup>CGAAA<sup>CTAT</sup>-AT---GAG<sup>CTACTC</sup>CAAGA-C  
 Erzo CCAAGCAAAGAGTGC-TTTAGTTTACGC<sup>CC</sup>CGAAA<sup>CTAA</sup>-GT---GAG<sup>CTACTC</sup>CAAGA-C  
 Hxot CCAAGCAAAGCGTAC-TTTAGTTTACGT<sup>CC</sup>CGAAA<sup>CTAG</sup>-GT---GAG<sup>CTACTC</sup>CAAGA-C  
 Core TCAAGCAAAGCGAAC-TTTAGTTTACGT<sup>CC</sup>CGAAA<sup>CTAC</sup>-GT---GAG<sup>CTACTC</sup>TAAGA-C  
 Apve CCAAGCAAAGAGCAC-TTTAGTTTACGT<sup>CC</sup>CGAAA<sup>CTAC</sup>-GT---GAG<sup>CTACTC</sup>CAAGA-C  
 Lat j CCAAGCAAAGAGTACCTTTAGTTTATAC<sup>CC</sup>CGAAA<sup>CTAA</sup>CGT---GAG<sup>CTACTC</sup>CAAGA-C  
 Laja TCAAGCAAAGCGTAC-TTTAGTTTACCC<sup>CC</sup>CGAAA<sup>CCAG</sup>TGT---GAG<sup>CTACTC</sup>CAAGA-C

Syja C AAGCA AAGT AATGC - TTTA GTTTG ATTC CC CGAAA CTAG - GT --- GAG CTACTC CAAGT - C  
 Epme C CAAGC AAAG AGCAC - TTTA GTTTG ACAA CC CGAAA CTTT - GT --- GAG CTACTC CAAA - C  
 Grse T CAAGC AAAA TGCAT - TTTA GTTTG ACAA CC CGAAA CTAT - GT --- GAG CTACTC CGAG - C  
 Clja T CAAGC AAAG TGATC - TTTA GTTTG ACAT CC CGAAA CTAA - GT --- GAG CTACTC CAAG - C  
 Ogcy C CAAGC GAAG AGAAC - TATA GTTTG GCCC CC CGAAA CTGA - GT --- GAG CTACTC CAAG - C  
 Plna T CAAGC AAAA AGCAT - TTTA GTTTG ATTC CC CGAAA CTAC - GT --- GAG CTACTT CAAG - C  
 Lema T CAGGC AAAG AGAAC - TTTA GTCTG ACAC CC CGAAA CTAA - GT --- GAG CTACTC CAAG - C  
 Etzo C CAAGC AAAG TGTC - TTTA GTTTG ATAA CC CGAAA CTAA - GT --- GAG CTACTC CAAG - C  
 Apse T CAAGC GAAG AGCAC - TTTA GTTTG ACAC CC CGAAA CCAA - GT --- GAG CTACTC CAAG - C  
 Epde T CAAGC AAAG AGCAC - TTTA GTTTG ATTC CC CGAAA CTAG - GT --- GAG CTACTC CAAG - C  
 Slja T TAAGC AAAG AGAAC - TTTA GTTTA AGAC CC CGAAA CTAT GTI --- GAG CTACTC CGAG - C  
 Bsja C CAAGC AAAG AGCAC - TTTA GTTTG ACAC CC CGAAA CTAC - GT --- GAG CTACTC CAAG - C  
 Ecna C TAAGC AAAG AGCCC - TTTA GTTTA GTAC CC CGAAA CTAG - GT --- GAG CTACTC CAAG - C  
 Cohi T TAAGC GAAG AGCAC - TTTA GTTTA ATAC CC CGAAA CTAG GTI --- GAG CTACTC CAAG - C  
 Caar T CAAGC AAAG AGAGC - TTTA GTTTG AAAC CC CGAAA CTGC - GT --- GAG CTACTC CAAG - C  
 Came T CAAGC AAAG AGAAC - TTTA GTTTG AAAT CC CGAAA CTGT - GT --- GAG CTACTC CAAG - C  
 Mema T CAAGC AAAG AGCAC - TTTA GTTTG ACCA CC CGAAA TTAG - GT --- GAG CTACTC CAAG - C  
 Lenu T TGAGC GAAA AGAAT - TTTA GTTCA AGCC CC CGAAA CCAG - AC --- GAG CTACTC CAGG - C  
 Brja T CAAGC GAAG AGCAT - TTTA GTTTG ATCC CC CGAAA CTAC - GT --- GAG CTACTC CAAG - C  
 Plma C CAAGC AAAG AGAAC - TTTA GTTTA GGAC CC CGAAA CTAC - GT --- GAG CTACTC CAAG - C  
 Emst C CAAGC AAAG AGCAC - TTTA GTTTG GCTC CC CGAAA CTAA - GT --- GAG CTACTC CAAG - C  
 Ptti C CAAGC AAAG AGCAC - TTTA GTTTA AAGC CC CGAAA CCGA - GC --- GAG CTACTC CAAG - C  
 Losu C CAAGC AAAG AGAAT - TTTA GTTTG ACCC CC CGAAA CTAG - AT --- GAG CTACTC CAAG - C  
 Geoy T CAAGC AAAG TGCA - TTTA GTTTG ATTT CC CGAAC CTAC - GC --- GAG CTACTC CAAG - C  
 Dipi C CAAGC AAAG AGAAC - TTTA GTTTG ACAC CC CGAAA CTAA - GT --- GAG CTACTC CAAG - C  
 Pama C CAAGC AAAG AGGAC - TTTA GTTTG GCCC CC CGAAA CTAA - GT --- GAG CTACTC CAGG - C  
 Leob C CAAGC AAAG AGCAC - TTTA GTTTG CTAC CC CGAAA CTAG - AC --- GAG CTACTC CAAG - C  
 Neba C CAAGC AAAG CGCCC - TTTA GTTTG GTTT CC CGAAA CTAA - GT --- GAG CTACTC CGAG - C  
 Pdpi T TAAGC AAAG AGAAC - TTTA GTTTA AAGC CC CGAAA CCGG - GT --- GAG CTACTC CAAG - C  
 Nimi T CAAGC AAAG AGCAC - TTTA GTTTG ATTC CC CGAAA CTAC - GT --- GAG CTACTT CAAG - C  
 Uptr T CAAGC AAAG AGAAC - TTTA GTTTG AAAC CC CGAAA CTAG - CT --- GAG CTACTC CAAG - C  
 Pesc T CAAGC AAAG GGCAC - TTTA GTTTG AAAC CC CGAAA CTAG - AT --- GAG CTACTT CAAG - C  
 Baar C CAAGC AAAG AGTAC - TTTA GTTTG AATC CC CGAAA CTAG TGTI --- GAG CTACTC CAAG - C  
 Moar T CAAGC AAAG AGCAC - TTTA GTTTG ACTC CC CGAAA CTAA - GT --- GAG CTACTC CAAG - C  
 Toja C CAAGC AAAG AGCAC - TTTA GTTTG ATGC CC CGAAA CTAG TGTI --- GAG CTACTT CAAG - C  
 Chau C CGAGC AAAG AGCAC - TTTA GTTCG GCTC CC CGAAA CTAA - GT --- GAG CTACTC CAAA - C  
 Chse C CAAGC AAAG CGTAC - TTTA GTTTG CTTT CC CGAAA CTAA - GT --- GAG CTACTC CAAG - T  
 Enar T CAAGC AAAG AGATC - TTTA GTTTG ATTC CC CGAAA CTAA - GT --- GAG CTACTC CAAG - C  
 Hpty C CAAGC AAAA AGTAT - TTTA GTTTG GTTC CC CGAAA CTAA - GT --- GAG CTACTC CAAG - C  
 Nana T CAAGC AAAG AGCAC - TTTA GTTTG ACAC CC CGAAA CTAA - GT --- GAG CTACTC CAAG - C  
 Mcst C CAAGC AAAG AGCCC - TTTA GTTTG ACTT CC CGAAA CTGG - GT --- GAG CTACTC CAAG - C  
 Rhox C CGAGC AAAG AGACC - TTTA GTTCG GCCC CC CGAAA CTAA - GC --- GAG CTACTC CAAG - C  
 Opfa T CAAGC AAAG AGTTC - TTTA GTTTG ACCC CC CGAAA CTAG - GT --- GAG CTACTC CAAG - C  
 Paar C CAAGC GAAG AGAAC - TTTA GTTTG ATAC CC CGAAA CTGG GTI --- GAG CTACTC CAAG - C  
 Gozo C CAAGC AAAG CGCG - TTTA GTTTG GTAC CC CGAAA CTAA - GT --- GAG CTACTC CAAG - C  
 Ackr C CAAGC AAAG AGCCC - TTTA GTTTG TCCC CC CGAAA CTAA - GT --- GAG CTACTT CAAG - C  
 Elev T CAGGC AAAG AGAAC - TTTA GTCTG AACC CC CGAAA CTAA - GT --- GAG CTACTC CAAG - C  
 Trdu T CAAGC AAAA AGCAT - TATA GTTTG ATAC CC CGAAA CTAA - GC --- GAG CTACTC CAAG - C  
 Amoc T CAAGC AAAA AGAAT - TTTA GTTTG ACAC CC CGAAA CTAG - GT --- GAG CTACTC CAAG - C  
 Hame T TAAGC AAAG AGCCC - TTTA GTTAA GTAC CC CAAGG GAAG - GC TGAAAA CCGAAA TGAAG - T  
 Chso C CAGGC GAAA AGATI - TTTA GTCTG ATGT CC CGAAA CCAA - GT --- GAG CTACTC CAAG - C  
 Lyto C CAAGC AAAG CGTGC - TTTA GTTTG ATAC CC CGAAA CTGG - GT --- GAG CTACTC CAAG - C

|      |   |       |       |       |   |   |     |       |      |    |       |      |   |    |   |   |   |     |        |       |   |   |   |
|------|---|-------|-------|-------|---|---|-----|-------|------|----|-------|------|---|----|---|---|---|-----|--------|-------|---|---|---|
| Encr | C | CAAGC | GAAG  | CGTGC | - | T | TTA | GTTTG | GTAT | CC | CGAAA | CTGC | - | GT | - | - | - | GAG | CTACTC | CAAG  | A | - | C |
| Bvar | T | CAAGC | AAAG  | CGTTC | - | T | TTA | GTTTG | AAAA | CC | CGAAG | CTAA | - | GC | - | - | - | GAG | CTACTC | CAAG  | A | - | C |
| Noco | T | CAAGC | AAAA  | AGATT | - | T | TTA | GTTTG | TTAA | CC | CGAAA | CTAA | - | GC | - | - | - | GAG | CTACTC | CAAG  | A | - | C |
| Chsp | C | CTGGC | AAAA  | TGAGT | - | T | TTA | GTCAG | GCCC | CC | CGAAA | CTAA | - | GT | - | - | - | GAG | CTACTC | CAAG  | A | - | T |
| Arja | C | CAAGC | AAAG  | AGTAC | - | T | TTA | GTTTG | ACGT | CC | CGAAA | CTAC | - | GT | - | - | - | GAG | CTACTC | CAAG  | A | - | C |
| Pase | T | TAAGC | AAAG  | AGCCC | - | T | TTA | GTTTA | ATAC | CC | CGAAA | CTAG | C | GT | - | - | - | GAG | CTACTC | CAAG  | A | - | C |
| Trel | C | TAAGC | ACAG  | AGTAC | - | T | TCA | GTTTT | AGAC | CC | CGAAA | CTAG | - | GT | - | - | - | GAG | CTACTC | CGAG  | A | - | C |
| Lifa | C | GAAGC | AAAG  | TGAAC | - | T | TTA | GTTTC | CTAC | CC | CGAAA | CTAG | - | GT | - | - | - | GAG | CTACCC | CAGG  | A | - | C |
| Acur | T | CAAGC | AAAG  | AGTAC | - | T | TTA | GTTTG | ACTT | CC | CGAAA | CTAA | - | GT | - | - | - | GAG | CTACTC | CAAG  | A | - | C |
| Ampe | C | CGAGC | GAAG  | AGAAC | - | T | TTA | GTTTG | CTTT | CC | CGAAA | CTAA | - | GT | - | - | - | GAG | CTACTC | CAGG  | A | - | C |
| Urja | C | CAAGC | ATAA  | AGAAC | - | T | TTA | GTTTG | ACAC | CC | CGAAA | CTAG | - | GT | - | - | - | GAG | CTACTT | CGACT | - | - | C |
| Enet | T | CAAGC | AAAG  | GGATC | - | T | TTA | GTTTG | AGAC | CC | CGAAA | CCTC | - | GC | - | - | - | GAG | CTACCT | CAGAG | - | - | C |
| Ptbr | T | TAAGC | AAAA  | AGAAT | - | T | TTA | GTTTA | ATAC | CC | CGAAA | CCAG | - | GC | - | - | - | GAG | CTACCC | CAAG  | A | - | C |
| Safa | T | CAAGC | AAAA  | AGCCC | - | T | GTA | GTTTG | AAAA | CC | CGAAA | CCAA | - | GT | - | - | - | GAG | CTACTC | CAAG  | A | - | C |
| Icae | C | CAAGC | GAAG  | AGCAC | - | T | TTA | GTTTG | GAAC | CC | CGAAA | CTAT | - | GT | - | - | - | GAG | CTACTC | CAAG  | A | - | C |
| Asmi | T | AAAGC | GAAAT | TGTTT | - | T | TTA | GCTTA | CAGC | CC | CGAAA | CCAG | - | GC | - | - | - | GAG | CTACTC | CAAG  | A | - | C |
| Foal | T | TAAGC | AAAG  | CGAGC | - | T | GTA | GTTTA | ATTA | CC | CGAAA | CCAA | - | GC | - | - | - | GAG | CTACTC | CGAG  | A | - | C |
| Drze | T | CAAGC | AAAG  | AGCAC | - | T | TTA | GTTTG | AAAT | CC | CGAAA | CCTA | - | GT | - | - | - | GAG | CTACTC | CAAG  | A | - | C |
| Rhas | A | CAAGC | AAAG  | AGCGC | - | T | TTA | GTTTG | GGAC | CC | CGAAA | CTAA | - | GT | - | - | - | GAG | CTACTC | CAAG  | A | - | C |
| Elac | C | TGAGC | AAAA  | CGAAT | - | T | TTA | GTTTA | GACC | CC | CGAAA | CTAA | - | GT | - | - | - | GAG | CTACTC | CAAG  | A | - | C |
| Kugu | C | CAAGC | AAAA  | AGTAT | - | T | TTA | GTTTG | ACAC | CC | CGAAA | CCAG | - | GT | - | - | - | GAG | CTACTC | CAAG  | A | - | C |
| Plor | T | CAAGC | AAAG  | AGCAC | - | T | TTA | GTTTG | ATTC | CC | CGAAA | CTAG | - | GT | - | - | - | GAG | CTACTC | CAAG  | A | - | C |
| Sgun | C | CAAGC | AAAG  | AGCCC | - | T | TTA | GTTTG | ACTT | CC | CGAAA | CTTA | - | GT | - | - | - | GAG | CTACTC | CAAG  | A | - | C |
| Zaco | T | CAAGC | AAAG  | AGCAC | - | T | TTA | GTTTG | ACTC | CC | CGAAA | CTGT | - | GC | - | - | - | GAG | CTACTC | CAAG  | A | - | C |
| Zbfl | C | CAAGC | AAAG  | AGAAC | - | T | TTA | GTTTG | ACTC | CC | CGAAA | CTAA | - | GT | - | - | - | GAG | CTACTC | CAAG  | A | - | C |
| Spba | C | CAAGC | AAAA  | AGTTT | - | T | TTA | GTTTG | ATAC | CC | CGAAA | CTAA | - | GC | - | - | - | GAG | CTACTC | CAAG  | A | - | C |
| Game | C | CAAGC | AAAG  | AGCCC | - | T | TTA | GTTTG | GACC | CC | CGAAA | CTAC | - | GT | - | - | - | GAG | CTACTC | CAAG  | A | - | C |
| Thth | C | CAAGC | AAAG  | AGAAC | - | T | TTA | GTTTG | GACC | CC | CGAAA | CTAG | - | GT | - | - | - | GAG | CTACTC | CAAG  | A | - | C |
| Xigl | T | CAAGC | GAAG  | AGCAC | - | T | TTA | GTTTG | ATAC | CC | CGAAA | CTAG | - | GT | - | - | - | GAG | CTACTC | CAAG  | A | - | C |
| Hyja | C | CAAGC | AAAG  | AGCAC | - | T | TTA | GTTTG | GACC | CC | CGAAA | CTAC | - | GT | - | - | - | GAG | CTACTC | CAAG  | A | - | C |
| Psan | C | CAAGC | AAAG  | AGCAC | - | T | TTA | GTTTG | GACC | CC | CGAAA | CTAC | - | GC | - | - | - | AAG | CTACTC | CAAG  | A | - | C |
| Cupa | C | CAAGC | AAAG  | AGCAC | - | T | TTA | GTTTG | GGCC | CC | CGAAA | CTAC | - | GT | - | - | - | GAG | CTACTC | CAAG  | A | - | C |
| Mpch | T | CAAGC | AAAG  | AGCAC | - | T | TTA | GTTTG | CCTT | CC | CGAAA | CTAA | - | GT | - | - | - | GAG | CTACTC | CAAG  | A | - | C |
| Char | C | CAAGC | AAAG  | AGCAC | - | T | TTA | GTTTG | ACCC | CC | CGAAA | CTAA | - | GT | - | - | - | GAG | CTACTC | CAAG  | A | - | C |
| Pser | C | CAAGC | AAAG  | AGCAC | - | T | TTA | GTTTG | ACTC | CC | CGAAA | CTAG | C | GT | - | - | - | GAG | CTACTC | CAAG  | A | - | C |
| Prol | T | CAAGC | AAAG  | AGAAC | T | T | AAA | GTTTG | TAAC | CC | CGAAA | CTGA | - | GT | - | - | - | GAG | CTACTC | CAAG  | A | - | C |
| Plbi | T | CAAGC | AAAG  | AGAAC | C | T | AAA | GTTTG | TAAC | CC | CGAAA | CTGA | - | GT | - | - | - | GAG | CTACTC | CAAG  | A | - | C |
| Calu | C | CAAGC | AAGG  | AGCAC | - | C | ATA | GCTTG | ATAC | CC | CGAAA | CTGG | - | GT | - | - | - | GAG | CTACTC | CAGG  | A | - | C |
| Papa | C | CAAGC | GAAG  | AGCCC | - | T | TTA | GTTTA | CTAC | CC | CGAAA | CTAG | - | GT | - | - | - | GAG | CTACTC | CAAG  | A | - | C |
| Sufr | C | TAAGC | AAAA  | AGAAT | - | T | TTA | GTTTA | AACC | CC | CGAAA | CTTA | - | TT | - | - | - | GAG | CTACTC | CAGG  | A | - | C |
| Stci | T | TGGGC | AAAA  | CGATT | - | T | TTA | GTCCA | ATCC | CC | CGAAA | CTAA | - | GT | - | - | - | GAG | CTACTC | CGAG  | A | - | C |
| Taru | T | TAGGC | AAAG  | AGCAC | - | T | TTA | GTCTA | ACAC | CC | CGAAA | CTGA | - | AT | - | - | - | GAG | CTACTC | CAAG  | A | - | C |
| Rala | C | TAGGC | AAAA  | AGAAT | - | T | TTA | GTCTA | GTCC | CC | CGAAA | CTAA | - | GT | - | - | - | GAG | CTACTC | CGAG  | A | - | C |

\* \* \* \* \*

|      | 12   | HVR                | 12'     | 13   | 13'                      |
|------|------|--------------------|---------|------|--------------------------|
| Scca | AGCA | -----TT-AT-----    | AGAGC   | -TAA | CCC--GTCTCTGTGGCAAAAGA-G |
| Muma | AGCA | TT---A-----        | TTAGAGC | -TAA | CCC--GTCTCTGTGGCAAAAGA-G |
| Erca | AGTT | G---TAA-----       | GAGC    | -TAA | CCC--GTCTCTGTGGCAAAAGG-G |
| Pose | AGTT | AA-----            | AAGAGC  | -CAA | CCC--GTCTCTGTGGCAAAAGA-G |
| Actr | AGCC | T-----AA-----      | TAGGGC  | -AAA | CCC--GTCTCTGTGGCAAAAGA-G |
| Scal | AGCC | T---A---AC-----    | AGGGC   | -AAA | CCC--GTCTCTGTGGCAAAAGA-G |
| Posp | AGCC | -----TA-----       | ACAGGGC | -AAA | CCC--GTCTCTGTGGCAAAAGA-G |
| Atsp | AGTC | TACCA-----         | AGGAC   | -CAA | TCC--GTCTCTGTGGCAAAAGA-G |
| Leoc | AGTC | TA---CCA-----      | GGGC    | -TAA | TCC--GTCTCTGTGGCAAAAGA-G |
| Amca | AGCC | TC---CTA-----      | GGGC    | -CAA | CCC--GTCTCTGTGGCAAAAGA-G |
| Osbi | AGCC | TAC---A-----       | CAGGGC  | -AAA | CCC--GTCTCTGTGGCAAAAGA-G |
| Pabu | AGCT | TT---AATG-----     | A--GAGC | -CAA | CCC--GTCTCTGTAGCAAAAGA-G |
| Hial | AGCC | TA---TC-----       | CAGGGC  | -CAA | CCC--GTCTCTGTGGCAAAAGA-G |
| Elha | AGCC | -----CATAT-----    | G--GGC  | -CAA | CCC--GTCTCTGTGGCAAAAGA-G |
| Mlcy | AGCC | CC---TTAA-----     | GGGC    | -CAA | CCC--GTCTCTGTGGCAAAAGA-G |
| Algl | AGCC | -----GTT-----      | TAGGGC  | -CAA | CCC--GTCTCTGTGGCAATAGA-G |
| Ptgi | AGCC | TA---TAA-----      | TAGGGC  | -CAA | CCC--GTCTCTGTGGCAAAAGA-G |
| Alaf | AGCC | T-----AC-A-----    | CCAGGGC | -CAA | CCC--GTCTCTGTGGCAAAAGA-G |
| Nock | AGCC | TA---AAC--A-----   | GGGC    | -CAA | CCC--GTCTCTGTGGCAAAAGA-G |
| Anja | AGCC | TA---ATTA-----     | GGGC    | -CAA | CCC--GTCTCTGTGGCAAAAGA-G |
| Gyki | AGCC | -----CAA-----      | TGGGGC  | -AAA | CCC--GTCTCTGTGGCAAAAGA-G |
| Syka | AGTC | T-----T-----       | AAAGGAC | -TAA | CCC--GTCTCTGTGGCAAAAGA-G |
| Opma | AGTT | -----TT-GA-----    | AGAAC   | -CAA | CCC--GTCTCTGTGGCAAAAGA-G |
| Comy | AGTC | TA---AA-----       | AGGAC   | -TAA | CCC--GTCTCTGTGGCAAAAGA-G |
| Sasp | AGCC | CA---AAT-----      | GAGC    | -GAA | CCC--ATCTCTGTAGCAAAAGA-G |
| Eupe | AGCC | -----AATAATT-----  | G--GGC  | -GAA | CCC--GTCTCTGTTGCAAAAGA-G |
| Enja | AGCC | AA---CTAT-----     | GGGC    | -CAA | CCC--GTCTCTGTGGCAAAAGA-G |
| Same | AGCC | TA---TTGT-----     | AGGGC   | -CAA | CCC--GTCTCTGTGGCAAAAGA-G |
| Chch | AGCC | TA---A-----GA----- | ACTGGC  | -CAA | CCC--GTCTCTGTGGCAAAAGA-G |
| Grgr | AGCC | TG---CAGA-----     | AGGGC   | -CAA | CCC--GTCTCTGTGGCAAAAGA-G |
| Caau | AGCC | TA---TTG-----      | AGGGC   | -CAA | CCC--GTCTCTGTGGCAAAAGA-G |
| Cyca | AGCC | TA---TT-----       | A-AGGGC | -CAA | CCC--GTCTCTGTGGCAAAAGA-G |
| Dare | AGCC | TA---TTTAACT-----  | TAGGGC  | -CAA | CCC--GTCTCTGTGGCAATAGA-G |
| Cost | AGCC | TA-----T-----      | A-AGGGC | -CAA | CCC--GTCTCTGTGGCAAAAGA-G |
| Leec | AGCC | TA---TC-----       | GGGC    | -CAA | CCC--TTCTCTGTGGCAAAAGA-G |
| CrIa | CGCC | AA---CAT-----      | GGGC    | -CAA | CCC--ATCTCTGTGGCAAAAGA-G |
| Clmc | AGCC | TA---TTA-----      | CAGGGC  | -CAA | CCC--GTCTCTGTGGCAAAAGA-G |
| Phin | AGCC | AA---ATC-----      | TAGGGC  | -AAA | CCC--GTCTCTGTGGCAAAAGA-G |
| Icpu | AGCC | TA---TTAATT-----   | AGGGC   | -CAA | CCC--GTCTCTGTGGCAAAAGA-G |
| Psto | AGCC | TA---TCAATT-----   | AGGGC   | -CAA | CCC--GTCTCTGTGGCAAAAGA-G |
| Cora | AGTC | T---ATTATAT-----   | A--GAGC | -CAA | CCC--GTCTCTGTGGCAAAAGA-G |
| Eisp | AGCC | TA---C-----        | ATAGGGC | -CAA | CCC--GTCTCTGTGGCAAAAGA-G |
| Apal | AGCC | TA---TCT-----      | CAGGGC  | -CAA | CCC--GTCTCTGTAGCAAAAGA-G |
| EsLu | AGCC | TA---ACAT-----     | AGGGC   | -CAA | CCC--ATCTCTGTGGCAAAAGA-G |
| Dape | AGCC | CA---A-AA-----     | GGGGC   | -AAA | CCC--GTCTCTGTGGCAAAAGA-G |
| Glse | AGCC | TATCTA-----        | GGGC    | -CAA | CCC--GTCTCTGTGGCAAAAGA-G |
| Naar | AGCC | TA---TC-----       | CAGGGC  | -CAA | CCC--GTCTCTGTGGCAAAAGA-G |
| Baoc | AGCC | -----TATCT-----    | A--GGC  | -CAA | CCC--GTCTCTGTGGCAAAAGA-G |
| Opso | AGCC | TG---TCCA-----     | GGGC    | -CAA | CCC--GTCTCTGTAGCAAAAGA-G |
| Alte | AGCC | T-----AT-C-----    | ATAGGGC | -CAA | CCC--GTCTCTGTGGCAAAAGA-G |
| Plap | AGCC | TA---TC-----       | ATAGGGC | -CAA | CCC--GTCTCTGTGGCAAAAGA-G |

Plal AGCCTA---T-TA-----TAGGGC-ACA CCC--GTCTCT GTTGCAAAAGA-G  
 Sami AGCCTA---TC-----GCAGGGC-CTA TCC--GTCTCT GTTGCAAAAGA-G  
 Rere AGCCTA---TTAT-----AGGGC-CAA CCC--GTCTCT GTTGCAAAAGA-G  
 Gama AGCCTA---TG-G-----CAGGGC-CAA CCC--GTCTCT GTTGCAAAAGA-G  
 Onmy AGCCTA---TTG-----TAGGGC-CAA CCC--GTCTCT GTTGCAAAAGA-G  
 Sasa AGCCAT--TA-----TAGGGC-CAA CCC--GTCTCT GTTGCAAAAGA-G  
 Cola AGCCT----ATTA--T-----A--GGGC-CAA CCC--GTCTCT GTTGCAAAAGA-G  
 Dita AGCCTA---T-A-----GCAGGGC-CAA CCC--ATCTCT GTTGCAAAAGA-G  
 Gogr AGCCTA---TCAT-----GGGC-CAA CCC--GTCTCT GTTGCAAAAGA-G  
 Chsl AGCCTT---TTA-----GGGC-CAA CCC--CCCTCT GTTGCAAAAGA-G  
 Atja AGCCTA---TAAC-----AGGGC-CAA CCC--GTCTCT GTTGCAAAAGA-G  
 Iido AGCCTA---TTA-----TAGGGC-CAA CCC--GTCTCT GTTGCAAAAGA-G  
 Auja AGCCT-----ATTA-----TAGGGC-CAA CCC--GTCTCT GTTGCAAAAGA-G  
 Chag AGCCTA---TTGA-----AGGGC-CAA CCC--GTCTCT GTTGCAAAAGA-G  
 Hami AGCCTA---TT-----AGGGC-CAA CCC--GTCTCT GTTGCAAAAGA-G  
 Saun AGCCTT---TT-----TAGGGC-TAA CCC--GTCTCT GTTGCAAAAGA-G  
 Nema AGCCTA---TGT-----T-GGGC-GAA CCC--GTCTCT GTTGCAAAAGA-G  
 Disp AGCCTA---C---GT-----TGGGC-AAA CCC--GTCTCT GTTGCAAAAGA-G  
 Myaf AGCCTAAGGCAATATCC-----GAAGGGC-ACA CCC--GTCTCT GTAGCAATAGA-G  
 Lagu AGCCTA---ATA-A-----GGGC-TAA CCC--GTCCCT GTTGCAAAAGG-G  
 Trtr TGCCTA---ACATT-----AAAGGGC-TAA CCC--GTCTCT GTTGCAAAAGA-G  
 Zucr AGCCT----AGA-----TAGGGC-TAA CCC--GTCTCT GTTGCAAAAGA-G  
 Pxja AGCCTA---TTTA-----ATAGGGC-AAA CCC--GTCTCT GTTGCAAAAGA-G  
 Pxlo AGCCTA---TTTAA-----TAGGGC-AAA CCC--GTCTCT GTTGCAAAAGA-G  
 Pctr AGCCTG---TAAT-----TTAGGGC-AAA CCC--GTCTCT GTTGCAAAAGA-G  
 Apsa AGCCT---TAT-----ATAGGGC-ACA CCC--GTCTCT GTTGCAAAAGA-G  
 Cabe AGCCTA---TAAA-----GAAGGGC-ACA CCC--GTCTCT GTCGCAAAAGA-G  
 Bzze AGCCCG---TAAA-----AGGGC-ACA CCC--GTCTCT GTTGCAAAAGA-G  
 Siim AGCTTG---TATA-----AAAGAGC-AAA CCC--GTCTCT GTTGCAAAAGA-G  
 Ctru AGCC------GACA-----AAGGGC-AAA CCC--GTCTCT GTAGCAAAAGA-A  
 Dpbr AGCCCG---TTA-----AAGGGC-AAA CCC--GTCTCT GTTGCAAAAGA-A  
 Caki AATCTA---TC--A-----GGAT-AAA CCC--GTCTCT GTTGCAAAAGA-G  
 Phja AGCCTA---TAATTAT-----TTAGGGC-AAA TCC--GTCTCT GTTGCAATAGA-G  
 Brsp AGCCT----TTT-----GGGC-CTA CCC--GTCTCT GTTGCAAAAGA-G  
 Gamo AGCCT----ATAA-----A--GGC-AAA CCC--GTCTCT GTTGCAAAAGA-G  
 Lolo AGCCTA-----C-----ATAGGGC-AAA CCC--GTCTCT GTTGCAAAAGA-G  
 Batr AGTC-A---CTGA-----C-GAAC-ACA CCC--ATCTCT GTTGCAAAAGA-G  
 Prmy -ATCAA---CTAA-----AGGAT TATA CCC--CCCTCT GTTGCAAAAGA-G  
 Loli AGCCTT---CATA-----AAGGGC-AAA CCC--GTCTCT GTTGCAAAAGA-G  
 Loam AGCCTA---TTT-----AAAGGGC-ACA CCC--GTCTCT GTTGCAAAAGAG  
 Chab AGCCTA---T-CA-----TAGGGC-AAA CCC--GTCTCT GTTGCAAAAGA-G  
 Chto AGCCTA---TCA-----TAGGGC-AAA CCC--GTCTCT GTTGCAAAAGA-G  
 Majo AGCCTG---ACA-AT-----AGGGC-GAA CCC--GTCTCT GTTGCAAAAGA-G  
 Hlst AGCCTA---TTAAAG-----GGGC-CAA CCC--GTCTCT GTTGCAAAAGA-G  
 Clpe AGCCCA-----TA-----ATGGGGC-AAA CCC--GTCTCT GTTGCAAAAGA-G  
 Mlmr AGCCTA---TAAA-----TAGGGC-GAA CTC--GTCTCT GTTGCAAAAGA-G  
 Crcr ACCTAAA-TC-----TAGGGT-AAA CCC--GTCTCT GTTGCAAAAGA-G  
 Muce ACCTA---AATC-----TAGGGT-AAA CCC--GTCTCT GTTGCAAAAGA-G  
 Bege ACCTA---ATAAA-----TAGGGC-CAA CCC--GTCTCT GTTGCAAAAGA-G  
 Mela AGCCTAATAAA-----AAGGGC-CAA CCC--GTCTCT GTTGCAATAGA-G  
 Hats AGCCTG---ACA-----ACAGGGC-CAA CCC--GTCTCT GTTGCAAAAGA-G  
 Orla AGCCTG---AATAA-----CAGGGC-TAA CCC--GTCTCT GTTGCAAAAGA-G



Cosa AGCCTA---AAT-----ATAGGGC-AAA CCC- GTCTCTGTGGCAAAAGA-G  
 Exsp AGCCTG---ACA-----ACAGGGC-AAA CCC- GTCTCTGTGGCAAAAGA-G  
 Depa AGCCCA---A--A-----AGGGGGC-AAA CCC- GTCTCTGTGGCAAAAGA-G  
 Rima AGTC TT---TTA-T-----AGGAC-ACA CCC- GTCTCTGTGGCAAAAGA-G  
 Fuol AGCCTA---ATA-TT-----AGGGC-ACA CCC- GTCTCTGTGGCAAAAGA-G  
 Gmaf AGCCTA---ATA-AA-----AGGGC-CAA TCC- GTCTCTGTGGCAAAAGA-G  
 Xeei AGCCTA---TTA-----ATAGGGC-AAA CCC- GTCTCTGTGGCAAAAGA-G  
 Pros AGCCTA---TAA-----CAGGGC-AAC CCC- GTCTCTGTAGCAAAAGA-G  
 Scmi AGCCTA---TAATA-----TAGGGC-AAA CCC- GTCTCTGTGCAAAAGA-G  
 Rolo AGCCT---ATT-AT-----AGGGC-AAA CCC- GTCTCTGTGGCAAAAGA-G  
 Cere AGCCTA---TTTT-----AGGGC-AAA CCC- GTCTCTGTTGCAAAAGA-G  
 Daga AGCCTA---TTG-----TAGGGC-AAA CCC- GTCTCTGTTGCAAAAGG-G  
 Anco AGCCTATCC-----AGGGC-AAA CCC- GTCTCTGTGGCAAAAGA-G  
 Dmve AGCCTA---TCA-----TAGGGA-TAA CCC- GTCTCTGTGGCAAAAGA-G  
 Dmar AGCCTA---TCA-----TAGGGC-TAA CCC- GTCTCTGTGGCAAAAGA-G  
 Anka AGCCTA---TA-----TAGGGC-AAA CCC- GTCTCTGTGGCAAAAGA-G  
 Moja AGCCTA---T-----ATAGGGC-AAA CCC- GTCTCTGTGGCAAAAGA-G  
 Hoja AGCCTA---TA-----TAGGGC-AAA CCC- GTCTCTGTGGCAAAAGA-G  
 Bede AGCCTA---T-A-----ACAGGGC-AAA CCC- GTCTCTGTGGCAAAAGA-G  
 Bosp AGCCTA---TA-----ACAGGGC-AAA CCC- GTCTCTGTGGCAAAAGA-G  
 Mysp AGCCTA---T-T-----ATAGGGC-CAA CCC- GTCTCTGTGGCAAAAGA-G  
 Osja AGCCTA---TT-A-----TAGGGC-CAA CCC- GTCTCTGTGGCAAAAGA-G  
 Sgro AGCCCA---T-AA-----TGGGGC-CAA CCC- GTCTCTGTGGCAAAAGA-G  
 Pzpa AGCCCA---AT-----TGGGGC-TAA CCC- GTCCCTGTGGCAAAAGG-G  
 Zeja AGCC C-----AAC-----TGGGGC-AAA CCC- GTCCCTGTGGCAAAAGG-G  
 Znne AGCC C-----AAT-----TGGGGC-AAA CCC- GTCCCTGTGGCAAAAGG-G  
 Zefa AGCCCA---AT-----TGGGGC-AAA CCC- GTCCCTGTGGCAAAAGG-G  
 Acni AGCCCA---ATT--G-----GGGC-CAA CCC- GTCCCTGTGGCAAAAGG-G  
 Ncrh AGCCCA---AT---T-----GGGGC-CAA CCC- GTCCCTGTGGCAAAAGG-G  
 Agca AGCCT-----GTTA-----ATAGGGC-AAA CCC- GTCTCTGTGGCAAAAGA-G  
 Hydy AGCCTG---TTA--A-----TAGGGC-ACA CCC- GTCTCTGTTGCAAAAGA-G  
 Gsac AGCCT-----ATTA-----ATAGGGC-ACA CCC- GTCTCTGTTGCAAAAGA-G  
 Pevo AGCCTA---TTA-AT-----AGGGC-CAA CCC- GTCTCTGTGGCAAAAGA-G  
 Hiku AGTCAA---AA---CAT-----AATGGAC-AAA TCC- GTACCTGTGGCAAAAGG-T  
 Inpa ACCCT---AATA-----ACTGGGT-TAA CCC- GTCCCTGTGGCAAAAGG-G  
 Auch AGCCTA---AT-A-----TAAGGGC-GAA CCC- GTCCCTGTAGCAAAAGG-G  
 Fico AGCTTA---CTT-----ATAGAGC-AAA CCC- GTCTCTGTGGCAAAAGA-G  
 Macs AGCCTA---ACAA-----TAGGGC-CAA CCC- GTCTCTGTGGCAAAAGA-G  
 Moal AGCCT-----AATA-----ATAGGGC-GAA CCC- GTCTCTGTGGCAAAAGA-G  
 Syma AGTCTAC--AA-----CAGGAC-CAA CCC- GTCTCTGTGGCAAAAGA-G  
 Maf r AGCCCA---TA-----TGGGGC-CAA CCC- GTCTCTGTGGCAAAAGA-G  
 Dcpe AGCCTA---GCA-AT-----AGGGC-CAA CCC- GTCTCTGTAGCAAAAGA-G  
 Dct i AGCCTA---GTA-AT-----AGGGC-CAA CCC- GTCTCTGTAGCAAAAGA-G  
 Hehi AGCCTA---TTTA-----TAGGGC-GAA CCC- GTCTCTGTGGCAAAAGA-G  
 Stam AGCCTA---TTAA-----TAGGGC-CAA CCC- GTCTCTGTGGCAAAAGA-G  
 Hogi AGCCTA---TTT--A-----TAGGGC-AAA CCC- GTCCCTGTGGCAAAAGG-G  
 Erzo AGCCT-----ATTA-AT-----A--GGGC-ACA CCC- GTCTCTGTGGCAAAAGA-G  
 Hxot AGCCT-----ATCA-AT-----A--GGGC-GTA CCC- GTCTCTGTGGCAAAAGA-G  
 Core AGCCTA---TTAAT-----AGGGC-ATA CCC- GTCTCTGTGGCAAAAGG-G  
 Apve AGCCTA---TTAA-----TAGGGC-TTA CTC- GTCTCTGTAGCAAAAGA-G  
 Lat j AGCCTG---TTTA-----CAGGGC-AAA CCC- GTCTCTGTGGCAAAAGA-G  
 Laja AGCCTA---AT--AT-----AGGGC-ACA CCC- GTCTCTGTGGCAATAGA-G

Syja AGCCTA---ATA--C-----AGGGC-CAA CCC--GT TCT GTGGCAAAAGA-A  
 Epme AGCCTA---ATCA-----ATAGGGC-CAA CCC--GT TCT GTGGCAAAAGA-G  
 Grse AGCCATT-AA-----TAGGGC-GAA CCC--GT TCT GTGGCAAAAGA-G  
 Clja AGCCTA---AAAA-----TAGGGC-GAA CCC--GT TCT GTTGAAGAGA-G  
 Ogcy AGCCTA---TAAAT-----AGGGC-ACA CCC--GT TCT GTGGCAAAAGA-G  
 Plna AGCCTA---AAAT-----ATAGGGC-CAA CTC--GT TCT GTGGCAAAAGA-G  
 Lema AGCCTA---TCAT-----TAGGGC-ACA CCC--GT TCT GTGGCAAAAGA-G  
 Etzo AGCCTA---TTAAT-----AGGGC-AAA CCC--GT TCT GTGGCAAAAGA-G  
 Apse AGCCT----CTA-----AGGGC-GCA CCC--GT TCT GTGGCAAAAGA-G  
 Epde AGCCTA---ATA-----TAGGGC-GAA CCC--GT TCT GTTGAAGAGA-G  
 Slja AGCCTA---TGTAAG-----TTAGGGC-GAA CCC--GT TCT GTGGCAAAAGA-G  
 Bsja AGCCTA---CACA-----ATAGGGC-GAA CCC--GT TCT GTGGCAATAGA-G  
 Ecna AGCCTA---TTAA-----AGGGC-AAA CCC--GT TCT GTGGCAAAAGA-G  
 Cohi AGCCATT-A-----TAGGGC-AAA CCC--GT TCT GTGGCAAAAGA-G  
 Caar AGCCTA---TTT-----ATAGGGC-AAA CCC--GT TCT GTGGCAAAAGA-G  
 Came AGCCTA---TTTA-----TAGGGC-AAA CCC--GT TCT GTGGCAAAAGA-G  
 Mema AGCCTA---TCCA-----TAAGGGC-AAA CCC--GT TCT GTGGCAAAAGA-G  
 Lenu AGCC-A---ACA-----ATTGGG-AAA CCC--GT TCT GTGGCAAAAGA-G  
 Brja AGCCTA---TCA-----TAGGGC-AAA TCC--GT TCT GTGGCAAAAGA-G  
 Plma AGCCTA---TCAA-----TAGGGC-GAA CCC--GT TCT GTGGCAAAAGA-G  
 Emst AGCCTA---TCAA-----TAGGGC-AAA CCC--GT TCT GTGGCAAAAGA-G  
 Ptti AGCCTA---GTA-----TAAGGGC-AAA CCC--GT TCT GTGGCAAAAGA-G  
 Losu AGCCTG---ACTT-----ACAGGGC-AAA CCC--GT TCT GTGGCAAAAGA-G  
 Geoy AGCCTG---TTTA-----GAGGGC-AAA CCC--GT TCT GTGGCAAAAGA-G  
 Dipi AGCCTA---TTCA-----TTAGGGC-AAA CCC--GT TCT GTGGCAAAAGA-G  
 Pama AGCCTA---TT-----GTAGGGC-AAA CCC--GT TCT GTGGCAAAAGA-G  
 Leob AGCCTG---TAG-----CAGAGG-CAA CCC--GT TCT GTGGCAAAAGA-G  
 Neba AGCCT----ATCA-----A-GGGC-GAA CCC--GT TCT GTGGCAAAAGA-G  
 Pdpi AGCCTA---GTATAT-----AGGGC-AAA CCC--GT TCT GTGGCAAAAGA-G  
 Nimi AGCCTAA--AA-----TAGGGC-GAA CCC--AT TCT GTAGCAAAAGA-G  
 Uptr AGCCTG---ACA-AT-----AGGGC-GAA CCC--GT TCT GTGGCAAAAGA-G  
 Pesc AGCCT----A-TA-----TAGGGC-AAA CCC--GT TCT GTGGCAAAAGA-G  
 Baar AGCCATTATAGCCTGGCACTATAAATAGGGC-GAA CCC--GT TCT GTGGCAACAGA-G  
 Moar AGCCTAT---CAA-----TAGGGC-GAA CCC--GT TCT GTGGCAAAAGA-G  
 Toja AGCCTG---TTTA-----CAGGGC-AAA CCC--GT TCT GTGGCAAAAGA-G  
 Chau AGCCT----ATCT-----A-GGGC-AAA CCC--GT TCT GTAGCAAAAGA-G  
 Chse AGCCTA---GTA--A-----TAGGGC-GAA CCC--GT TCT GTGGCAAAAGA-G  
 Enar AGCCTA---TAA--A-----TAGGGC-ACA CCC--GT TCT GTGGCAAAAGA-G  
 Hpty AGCCT----AATA-----CAGGGC-AAA CCC--GT TCT GTGGCAAAAGA-G  
 Nana AGCCTA---ACTA-----AAGGGC-CAA CCC--GT TCT GTGGCAAAAGA-G  
 Mcst AGCCTA---TTAA-----TAGGGC-AAA CCC--GT CCT GTGGCAAAAGG-G  
 Rhox AGCCTA---AA-----ATAGGGC-AAA CCC--GT CCT GTGGCAAAAGG-G  
 Opfa AGCCTG---TTAGT-----A-GGGC-AAA CCC--GT CCT GTTGAAGAGG-G  
 Paar AGCCTA---TTAA-----TAGGGC-ACA CCC--GT TCT GTGGCAAAAGA-G  
 Gozo AGCCTA---ATTA-----ATAGGGC-ACA CCC--GT TCT GTTGAAGAGA-G  
 Ackr AGCCTA---TTAAT-----TAGGGC-TAA CCC--GT TCT GTCGCAAAAGA-G  
 Elev AGCCTA---TTT-----TAGGGC-ACA CCC--GT TCT GTGGCAAAAGA-G  
 Trdu AGTC TA---ATTTAT-----AGGAC-CAC CCC--AT TCT GTGGCAAAAGA-G  
 Amoc AGCCTA---AAAA-----CAGGGC-ACC CCC--GT TCT GTGGCAAAAGA-G  
 Hame AAACA---AA-----CA-CTC-GAA CCC--TT TCT GTGGCAAAAGA-G  
 Chso AGCCTA---TAA-----CAA GGC CAAA CCC--GT TCT GTGGCAAAAGA-G  
 Lyto AGCCTA---TTAA-----TAGGGC-ACA CCC--GT TCT GTGGCAAAAGA-G

|      |      |          |             |      |     |      |      |      |      |      |      |     |    |
|------|------|----------|-------------|------|-----|------|------|------|------|------|------|-----|----|
| Encr | AGCC | TA---    | TTA-----    | ATAG | GGC | -ACA | CCC  | --GT | CTCT | GTGG | CAAA | AGA | -G |
| Bvar | AGCC | T-----   | ATTA-----   | ATAG | GGC | -AAA | CCC  | --GT | CTCT | GTGC | CAAA | AGA | -G |
| Noco | AGCC | TG---    | TTAAT-----  | AGG  | TGC | -GCA | CCC  | --GT | CTCT | GTTG | CAAA | AGA | -G |
| Chsp | AGCC | TT---    | AT-----     | G    | GGC | -ACA | CCC  | --GT | CCCT | GTAG | CAAA | AGG | -G |
| Arja | AGCC | TA---    | TTA-----    | ATAG | GGC | -ACA | CCC  | --GT | CTCT | GTGG | CAAA | AGA | -G |
| Pase | AGCC | TA---    | CCAA-----   | GCAG | GGC | -CTA | CCC  | --GT | ATCT | GTAG | CAAA | AGA | -T |
| Trel | AGCC | -----    | TTT-----    | AAAG | GGC | -GTA | CCC  | --GT | CTCT | GTGG | CAAA | AGA | -G |
| Lifa | AGCC | TT---    | TC-----     | TTAG | GGC | -GCA | CCC  | --GT | CTCT | GTTG | CAAA | AGA | -G |
| Acur | AACC | TA---    | AT-G-----   | TAG  | GGT | -GAA | CCC  | --GT | CTCT | GTGG | CAAA | AGA | -G |
| Ampe | AGCC | TA---    | TAAT-----   | TAC  | GGC | -CAA | CCC  | --GT | CTCT | GTGG | CAAA | AGA | -G |
| Urja | AGTC | TA---    | GTA--A----- | TAG  | GAC | -TAA | CCC  | --GT | CTCT | GTGG | CAAA | AGA | -G |
| Enet | AGCC | T-----   | AAAT-----   | ACAG | GGC | -ACA | CCC  | --GT | TCT  | GTGG | CAAA | AGA | -A |
| Ptbr | AGTC | TA---    | CATTC-----  | GTAG | GAC | -CTA | CCC  | --GT | CTCT | GTGG | CAAG | AGA | -G |
| Safa | AGTC | TA---    | ATT-----    | AATA | GGA | -CTA | CTCC | GT   | CTCT | GTGG | CAAA | AGA | TG |
| Icae | AGCC | TA---    | TCAA-----   | TAG  | GGC | -AAA | CCC  | --GT | CTCT | GTGG | CAAA | AGA | -G |
| Asmi | GGTC | TA---    | CTAT-----   | TAG  | GAC | -CCA | CCC  | CCGG | CTCT | GTTG | CAAA | AGA | -G |
| Foal | AACC | TT---    | ATT-----    | GAAG | GGT | -AAA | CCC  | --GT | CTCT | GTGG | CAAA | AGA | -G |
| Drze | AGCC | TA---    | GAATA-----  | TAG  | GGC | -AAA | CCC  | --GT | CTCT | GTAG | CAAA | AGA | -G |
| Rhas | AGCC | TA---    | ACA-----    | TAG  | GGC | -AAA | CCC  | --GT | CTCT | GTGG | CAAA | AGA | -G |
| Elac | AGCC | TA---    | TAA-----    | G    | GGC | -GCA | CCC  | --GT | CTCT | GTGG | CAAA | AGA | -G |
| Kugu | AGCC | TA---    | TA-----     | AG   | GGC | -GAA | CCC  | --GT | CTCT | GTGC | CAAA | AGA | -G |
| Plor | AGCC | TA---    | TCAT-----   | TAG  | GGC | -CAA | CCC  | --GT | CTCT | GTGG | CAAA | AGA | -G |
| Sgun | AGCC | TA---    | TAAA-----   | CAG  | GGC | -AAA | CCC  | --GT | CTCT | GTGG | CAAA | AGA | -G |
| Zaco | AGCC | TAC---   | CAA-----    | TAG  | GGC | -AAA | CCC  | --GT | CTCT | GTGG | CAAA | AGA | -G |
| Zbfl | AGCC | TA---    | TCA-AT----- | AG   | GGC | -AAA | CCC  | --GT | CTCT | GTGG | CAAA | AGA | -G |
| Spba | AGCC | TA---    | CCAA-----   | TAG  | GGC | -GAA | CCC  | --GT | CTCT | GTGG | CAAA | AGA | -G |
| Game | AGCC | TA---    | TCAA-----   | TAG  | GGC | -AAA | CCC  | --GT | CTCT | GTGG | CAAA | AGA | -G |
| Thth | AGCC | TA---    | TC-A-----   | ATAG | GGC | -AAA | CCC  | --GT | CTCT | GTGG | CAAA | AGA | -G |
| Xigl | AGCC | TA---    | TTTAT-----  | TAG  | GGC | -GAA | CCC  | --GT | CTCT | GTGG | CAAA | AGA | -G |
| Hyja | AGCC | TATC-AA- | -----       | TAG  | GGC | -AAA | CCC  | --GT | CTCT | GTGG | CAAT | AGA | -G |
| Psan | AGCC | TA---    | TAAATA----- | TAG  | GGC | -AAA | CCC  | --GT | CTCT | GTGG | CAAT | AGA | -G |
| Cupa | AGCC | TA---    | TCA-AT----- | AG   | GGC | -AAA | CCC  | --GT | CTCT | GTGG | CAAA | AGA | -G |
| Mpch | AGCC | TA---    | A-A-A-----  | TAG  | GGC | -CAA | CCC  | --GT | CTCT | GTGG | CAAA | AGA | -G |
| Char | AGCC | TATT-T-  | -----       | TAG  | GGC | -CAA | CCC  | --GT | CTCT | GTGG | CAAA | AGA | -G |
| Pser | AGCC | TA---    | TCT-----    | ATAG | GGC | -AAA | CCC  | --GT | CTCT | GTGG | CAAA | AGA | -G |
| Prol | AGCC | TA---    | TTTA-----   | TAG  | GGC | -AAA | CCC  | --GT | CTCT | GTGG | CAAA | AGA | -G |
| Plbi | AGCC | TA---    | TTTAT-----  | AG   | GGC | -GAA | CCC  | --GT | CTCT | GTGG | CAAA | AGA | -G |
| Calu | AGCC | TA-----  | T-----      | ATAG | GGC | -AAA | CCC  | --GT | CTCT | GTGG | CAAA | AGA | -G |
| Papa | AGCC | TA---    | CAAAC-----  | CAG  | GGC | -AAA | CCC  | --GT | CTCT | GTAG | CAAA | AGA | -G |
| Sufr | AGTC | TC----   | AAA-----    | TAG  | GAC | -GCA | CCC  | --GT | CTCT | GTGG | CAAA | AGA | -G |
| Stci | AGCC | TA---    | TTAA-----   | TAG  | GGC | -ACA | CCC  | --GT | CTCT | GTGG | CAAA | AGA | -G |
| Taru | AGCC | TTTA-    | -----       | TAG  | GGC | -ACA | TCC  | --GT | CTCT | GTGG | CAAA | AGA | -G |
| Rala | AGCC | TA---    | TAA-----    | ATAG | GGC | -ACA | CCC  | --GT | CTCT | GTGG | CAAA | AGA | -G |

\*                    \* \* \* \* \* \* \* \* \*

|      | 13'  | 11' | 14  | 14'  | 10'     | 9'   | 15    |     |        |        |          |    |    |       |   |
|------|------|-----|-----|------|---------|------|-------|-----|--------|--------|----------|----|----|-------|---|
| Scca | TGGC | AA  | GAC | TTCC | CGAGTAG | TGGT | GACAA | GCC | TACCGA | GTTTAC | TGATAGCT | GG | TT | ACCCA | A |
| Muma | TGGC | AA  | GAC | TTCC | CGAGTAG | CGGT | GAAAA | GCC | TACCGA | GTTTAC | TGATAGCT | GG | TT | ACCCA | A |
| Erca | TGGC | AA  | GAC | TTCC | CAAGTAG | AGGT | GATAA | GCC | TAACGA | GCCTAG | TAATAGCT | GG | TT | ACTCA | A |
| Pose | TGGC | AA  | GAC | TTCC | CAAGTAG | AGGT | GACAA | GCC | TAACGA | GCCTAG | TGATAGCT | GG | TT | ACTTC | A |
| Actr | TGGC | AA  | GAT | CTCC | CGAGTAG | AGGC | GACAA | ACC | TAACGA | GCCTAG | TAATAGCT | GG | TT | GCTCA | G |
| Scal | TGGC | AA  | GAT | CTCC | CGAGTAG | AGGC | GACAA | ACC | TAACGA | GCCTAG | TAATAGCT | GG | TT | GCTCA | G |
| Posp | TGGC | AA  | GAT | CTCC | CGAGTAG | AGGC | GACAA | ACC | TAACGA | GCCTAG | TAATAGCT | GG | TT | GCTCA | A |
| Atsp | TGGC | AA  | GAT | CTCC | CGAGTAG | CGGT | GATAG | ACC | TAACGA | GCCTAG | TGATAGCT | GG | TT | GCTTA | G |
| Leoc | TGGC | AA  | GAT | CTCC | CGAGTAG | CGGT | GACAG | ACC | TAACGA | GTCTAG | TGATAGCT | GG | TT | GCTTA | G |
| Amca | TGGC | AA  | GAT | CTCC | CAAGTAG | TGGT | GACAG | ACC | TAACGA | GTTTAC | TTATAGCT | GG | TT | GCTTA | G |
| Osbi | TGGC | AA  | GAT | CTTC | CAAGTAG | AGGT | GACAA | ACC | TAACGA | ATCTAG | TGATAGCT | GG | TT | GCTTC | A |
| Pabu | TGGC | AT  | GAT | CCCT | GAGTAG  | AGGT | GACAA | ACC | TAACGA | GTTTAC | TTATAGCT | GG | TT | GCTTA | A |
| Hial | TGGC | AA  | GAT | CTCC | CGAGTAG | AGGT | GACAG | ACC | TAACGA | GTTTAC | TTATAGCT | GG | TT | GCTTA | G |
| Elha | TGGC | AA  | GAT | CCCC | CGAGTAG | AGGT | GAAAA | ATC | TAACGA | GTCTAG | TCATAGCT | GG | TT | GCTTA | G |
| Mlcy | TGGC | AA  | GAT | CTCC | CAAGTAG | AGGT | GACAA | ACC | TAACGA | GTTTAC | TGATAGCT | GG | TT | GCTTA | A |
| Algl | TGGC | AA  | GAC | TCCC | CGAGTAG | AGGT | GACAG | ACC | TATCGA | GCTCGG | TTATAGCT | GG | TT | GCTTA | G |
| Ptgi | TGGC | AC  | GAT | CCCC | CGAGTAG | AGGT | GACAA | ACC | TATCGA | GCCTAG | TTATAGCT | GG | TT | GCTTA | G |
| Alaf | TGGC | AA  | GAC | CCCC | CGAGTAG | AGGT | GACAA | ACC | TATCGA | GTCTAG | TTATAGCT | GG | TT | GCTTA | G |
| Nock | TGGC | AA  | GAC | CCCC | CGAGTAG | AGGT | GATAA | ACC | TATCGA | GCCTAG | TTATAGCT | GG | TT | GCTTA | G |
| Anja | TGGC | AA  | GAC | CCCC | CGAGTAG | AGGT | GATAA | GCC | TACCGA | GCCTAG | TTATAGCT | GG | TT | GCTTA | A |
| Gyki | TGGC | GAC | GAC | TCCC | CGAGTAG | AGGT | GACAA | GCC | TACCGA | ACCTGG | TGATAGCT | GG | TT | GCTCA | G |
| Syka | TGGC | AA  | GAC | CCCC | CGAGTAG | AGGT | GAAAA | GCC | TACCGA | GCCTAG | TTATAGCT | GG | TT | GCTTA | A |
| Opma | TGGC | AA  | GAC | CCCC | CGAGTAG | AGGT | GAAAA | ACC | TAACGA | GCCTAG | TTATAGCT | GG | TT | GCTTA | A |
| Comy | TGGC | AA  | GAC | TTCC | CGAGTAG | AGGT | GAAAA | GCC | TACCGA | GCCTAG | TTATAGCT | GG | TT | GCTTA | A |
| Sasp | TGGC | AA  | GAC | CCCC | CAAGTAG | AGGT | GACAA | ACC | AACCGA | GCCCCG | TTATAGCT | GG | TT | GCTTA | A |
| Eupe | TGGC | AA  | GAC | CCCC | CGAGTAG | AGGT | GATAG | ACC | TATCGA | GCCTAG | TGATAGCT | GG | TT | GCTTA | A |
| Enja | TGGC | AA  | GAT | CTCC | CGAGTAG | AGGC | AAAAA | ACC | TACCGA | GCCAAG | TTATAGCT | GG | TT | GCCCC | A |
| Same | TGGC | AA  | GAC | CCCC | CGAGTAG | AGGT | GAAAG | ACC | TACCGA | GTCAGG | TTATAGCT | GG | TT | GCCCC | A |
| Chch | TGGC | AA  | GAT | CTCC | CGAGTAG | AGGT | GACAG | ACC | TACCGA | ACTTAG | TGATAGCT | GG | TT | GCCCC | A |
| Grgr | TGGC | AA  | GAG | CTCC | CGAGTAG | AGGT | GACAG | ACT | TACCGA | GCTTGG | TGATAGCT | GG | TT | GCCCC | G |
| Caau | TGGC | AA  | GAG | CTCC | CGGTAG  | AGGT | GACAG | ACC | TACCGA | ACCTGG | TGATAGCT | GG | TT | GCCTA | A |
| Cyca | TGGC | AA  | GAG | CTCC | CGGTAG  | AGGT | GACAG | ACC | TACCGA | ACCTGG | TGATAGCT | GG | TT | GCCTA | A |
| Dare | TGGC | AA  | GAG | CTCC | CGGTAG  | AGGT | GACAG | ACC | TATCGA | ACCCGG | CAATAGCT | GG | TT | GTCTG | G |
| Cost | TGGC | AA  | GAG | CCCC | CGGTAG  | AGGT | GACAG | ACC | TACCGA | ACTTGG | TGATAGCT | GG | TT | GCCTA | A |
| Leec | TGGC | AA  | GAG | CCCC | CGGTAG  | AGGT | GATAA | GCC | TACCGA | ACTTGG | TGATAGCT | GG | TT | GCCTA | A |
| CrIa | TGGC | GAC | GAG | CCCC | CGGTAG  | AGGT | GATAG | ACC | TACCGA | ACTTGG | TGATAGCT | GG | TT | GTCTG | G |
| Clmc | TGGC | AA  | GAT | CTCC | CAGGTAG | AGGT | GACAG | ACC | TACCGA | ACTTGG | TGATAGCT | GG | TT | GCCTA | G |
| Phin | TGGC | AA  | GAT | CCCC | CGGTAG  | AGGT | GAAAA | GCC | TACCGA | GCCTGG | TGATAGCT | GG | TT | GCCTA | A |
| Icpu | TGGC | AA  | GAT | CTCC | CGGTAG  | AGGT | GACAA | ACC | TACCGA | ACTTAG | TTATAGCT | GG | TT | GCCTA | A |
| Psto | TGGC | AA  | GAT | TTCC | CGGTAG  | AGGT | GACAA | ACC | TACCGA | ACCTAG | TTATAGCT | GG | TT | GCCTA | A |
| Cora | TGGC | AA  | GAT | CTTT | GGGTAG  | GGGT | GACAG | ACC | TACCGA | ACTTAG | TTATAGCT | GG | TT | GCCTA | A |
| Eisp | TGGC | AA  | GAT | CTCC | CGGTAG  | AGGT | GACAG | ACC | TATCGA | ACTTGG | TGATAGCT | GG | TT | GCCTA | A |
| Apal | TGGC | AA  | GAT | CTCC | CGGTAG  | AGGT | GACAA | ACT | TATCGA | GCTTGG | TGATAGCT | GG | TT | GCCTA | A |
| EsLu | TGGC | AA  | GAT | CCCC | CGAGTAG | AGGT | GACAA | GCC | TACCGA | GTTTAC | TTATAGCT | GG | TT | GCTTA | A |
| Dape | TGGC | AA  | GAG | CCCT | GAGTAG  | AGGT | GATAA | ACC | TATCGA | GTTTAC | TTATAGCT | GG | TT | GCTTA | A |
| Glse | TGGC | AA  | GAG | CTCC | CGAGTAG | AGGT | GATAA | ACC | TACCGA | GTTTAC | TTATAGCT | GG | TT | GCTTA | A |
| Naar | TGGC | AA  | GAG | CTCC | CGAGTAG | AGGT | GATAA | ACC | TACCGA | GTTTAC | TTATAGCT | GG | TT | GCTTA | A |
| Baoc | TGGC | AA  | GAG | CTCC | CGAGTAG | AGGT | GACAA | ACC | TACCGA | GTCTAG | TTATAGCT | GG | TT | GCTTA | A |
| Opso | TGGC | AA  | GAG | CTCC | CGAGTAG | AGGT | GATAA | GCC | TACCGA | GTTTAC | TTATAGCT | GG | TT | GCTTA | A |
| Alte | TGGC | AA  | GAA | CTCC | CGAGTAG | AGGT | GACAA | ACC | TACCGA | ACCCGG | TTATAGCT | GG | TT | GCCTA | A |
| Plap | TGGC | AA  | GAA | CTCC | CGAGTAG | AGGT | GACAA | ACC | TACCGA | ACCCGG | TTATAGCT | GG | TT | GCCTA | A |

Plal TGGGAAAGAGCTCCGAGTAGAGGTGAAAGACC TATCGA GTCTAG TTATAGCT GG TT GTTCCA  
 Sami TGGAGAGAGCTCCGAGTAGAGGTGAAATACC TATCGA GTCTAG TTATAGCT GG TT GTTTAG  
 Rere TGGGAAAGAGCTCCGAGTAGAGGTGAAATACC TATCGA GTCTAG TTATAGCT GG TT GCCCAG  
 Gama TGGGAAAGAACTCTGAGTAGAGGTGATAAACCC TACCGA GTCTAG TTATAGCT GG TT GTCTAA  
 Onmy TGGGACGAGCCCCGAGTAGAGGTGATAAACCC TATCGA GCCTAG TTATAGCT GG TT GCTTAG  
 Sasa TGGGACGAGCCCCGAGTAGAGGTGACAAACC TATCGA GCCTAG TTATAGCT GG TT GCTTAG  
 Cola TGGGAAAGAGCCCCGAGTAGAGGTGATAAACCC TATCGA GCCTAG TTATAGCT GG TT GCTTAG  
 Dita TGGGAAAGAACTTTCGAGTAGAGGTGAAAAACC TACCGA ACCTAG TTATAGCT GG TT GCTTCG  
 Gogr TGGGAGAAATTCGAGTAGAGGTGAAAGACC TACCGA GCCTAG CTATAGCT GG TT GCTTAC  
 Chsl TGGGATGATCTCCGAGTAGAGGCAAAAACC AACCGA GCCTAG TTATAGCT GG TT GCTTAG  
 Atja TGGGAAAGAGCTTTCGAGTAGAGGTGACAAACC TACCGA GCCTAG TAATAGCT GG TT GTCTAA  
 lido TGGGAAAGAGCTTTCGAGTAGAGGTGACAAACC TACCGA GCCTAG TAATAGCT GG TT GTCTAA  
 Auja TGGGAAAGAGCTCCGAGTAGAGGTGATAAACCC TACCGA GTTTAG TTATAGCT GG TT GCCTAG  
 Chag TGGGAAAGAACTCTGAGTAGAGGTGACAGACC TACCGA GCCTAG TTATAGCT GG TT GCCTAG  
 Hami TGGGAAAGAACTCCGAGTAGAGGTGATAAACCC TACCGA GCCTGG TTATAGCT GG TT GCCTAA  
 Saun TGGGAAAGAGCTCCGAGTAGAGGTGATAAACCC TACCGA GCCTGG TTATAGCT GG TT GCCTAA  
 Nema TGGGAAAGAGCTTTCAGTAGAGGTGACAAACC TATCGA GCCTAG TTATAGCT GG TT GCCTCG  
 Disp TGGGACGATCTTTCAGTAGAGGTGACAAACC TATCGA GCCTAG TCATAGCT GG TT GTCTCA  
 Myaf TGGGACGACCTTTCAGTAGAGGTGACAAACC TATCGA GCCTAG TCATAGCT GG TT GTTTAA  
 Lagu TGGGAAAGAGCTTTCAGTAGAGGTGATAAACCC TACCGA GCCTAG TAATAGCT GG TT GCTTAG  
 Trtr TGGGAGTAACTCCAGTAGAGGTGATAAACCC TACCGA ACCTGG TGATAGCT GG TT ATCTAG  
 Zucr TGGGATGAAACGCTGAGTAGAGGTGATAAACCC TACCGA ACCTGG TGATAGCT GG TT ATCTAG  
 Pxja TGGGAAAGAGCTTTCAGTAGAGGTGATAAACCC TACCGA GCCCAG TTATAGCT GG TT GCCTCA  
 Pxlo TGGGAAAGAGCTTTCAGTAGAGGTGATAAACCC TACCGA GCCCAG TTATAGCT GG TT GCCTCA  
 Pctr TGGGAAAGATCTTTCAGTAGAGGTGACAAACC TACCGA GCTCAG TTATAGCT GG TT GCCTCG  
 Apsa TGGGAAAGATCTTTCAGTAGAGGTGACAAACC TACCGA GCTCAG TTATAGCT GG TT GCCTCA  
 Cabe TGGGAAAGATTCCTGAGTAGAGGCATAAACCC TACCGA ACCCGG TTATAGCT GG TT GTCTCG  
 Bzze TGGGAGGACCTTTCGAGTAGAGGTGACAGACC TACCGA ACCTAG TTATAGCT GG TT GCCTTA  
 Siim TGGGAAAGACCTTTCGAGTAGAGGTGACAGACC TATCGA ACTTAG TTATAGCT GG TT GCCTCG  
 Ctru TGGGAGAGAGCTTTCGAGTAGAGGTGATAAACCC TACCGA GTCTAG TTATAGCT GG TT GCCCAA  
 Dpbr TGGGAAAGAGCTTTCGAGTAGAGGTGACAAACC TACCGA GTCTAG TTATAGCT GG TT GCCCAA  
 Caki TGGGAAAGAGCTTTCGAGTAGAGGTGATAAACCC TATCGA GCACAG TTATAGCT GG TT GCCTAA  
 Phja TGGGAGAGAGCTTTCAGTAGAGGTGATAAACCC TACCGA GCACAG TTATAGCT GG TT GCCTCA  
 Brsp TGGGAGAGAGCTCCGAGTAGAGGTGATATACC TATCGA GCCCAG TTATAGCT GG TT GTCTCA  
 Gamo TGGGAAAGAGCTTTCGAGTAGAGGTGACAAACC TACCGA GCCCAG TTATAGCT GG TT GCCTGT  
 Lolo TGGGAAAGAGCTTTCGAGTAGAGGTGATAAACCC TACCGA GCACAG TTATAGCT GG TT GCCTCA  
 Batr TGGGAAAGAGCACCAGTAGAGACAAAACATC TAACAA AATTAG TTATAGCT GG TT CCTCAA  
 Prmy CGGGAAAGAGCCTTCAGTAGAGACGAAACATC TACCCT ATACAG TTATAGCT GG TT GCCCAA  
 Loli TGGGAAAGAGCTTTCGAGTAGAGGTGACAAACC TACCGA GCTTAG TTATAGCT GG TT CCCTCG  
 Loam TGGGAAAGAGCTTTCGAGTAGAGGTGACAGACC TACCGA GCTTAG TTATAGCT GG TT CCCTCG  
 Chab TGGGAGAGAGCTTTCGAGTAGAGGTGAAAAACC TACCGA GCCTAG TCATAGCT GG TT GCCTCG  
 Chto TGGGAGAGAGCTTTCGAGTAGAGGTGAAAAACC TACCGA GCCTAG TCATAGCT GG TT GCCTCG  
 Majo TGGGACGAGCTTTCGAGTAGAGGTGACAAACC TACCGA ACTTGG TTATAGCT GG TT GCCCCG  
 Hlst TGGGAAAGATCTTTCGAGTAGAGGTAAAAACC TACCGA GCTTAG TTATAGCT GG TT GCCCCG  
 Clpe TGGGAAAGAGCTTTCGAGTAGAGGTGACAAACC TACCGA GCCTAG TTATAGCT GG TT GCCTCG  
 Mlmr TGAGAAAGAGCTTTCGAGTAGAGGTAAAAACC AACCGA GCCTAG TTATAGCT GG TT GCCTCG  
 Crcr TGGGAAAGAGCTTTCGAGTAGAGGTGACAGACC TACCGA ACTTGG TTATAGCT GG TT GCTTCA  
 Muce TGGGAAAGAGCTTTCGAGTAGAGGTGACAGACC TACCGA ACTTGG TTATAGCT GG TT GCTTCA  
 Bege TGGGAAAGAGCTTTCAGTAGAGGTGATAAACCC TACCGA GCCTGG TTATAGCT GG TT ACCTCA  
 Mela TGGGAAAGAGCTTTCGAGTAGAGGTGACAGACC TACCGA ACTTAG TTATAGCT GG TT ACCTCA  
 Hats TGGGAAAGAGCTTTCGAGTAGAGGTGACAGACC TACCGA GCCTAG TTATAGCT GG TT ACCTCA  
 Orla TGGGATGATCTTTCAGTAGAGGTGACAGACC TATCGA ACTAAG TTATAGCT GG TT GCTCGT

Cosa TGGCAAGAGCTTTGAGTAGAGGTGATAAACCTACCGAACCTTAGTAATAGCTGGTTGCCTGA  
 Exsp TGGCAAGAACTTTGAGTAGCGGTGAAAAGCCGCCGACCTTAGTAATAGCTGGTTGCCTGA  
 Depa TGGCAAGATCTTTGAGTAGAGGTGACAGACCTACCGAACCTTAGTAATAGCTGGTTATCTGA  
 Rima TGGCAAGAGCTTTGAGTAGGGTGACAGACCTACCGAACCTGGTTATAGCTGGTTGCCTAA  
 Fuol TGGCAAGATCCTTTGAGTAGAGGTGATAAGCCGCCGACCTTAGTTATAGCTGGTTGCCTGA  
 Gmaf TGGCAAGAGCTTTGAGTAGAGGTGATAAACCTACCGAGCCTTAGTTATAGCTGGTTGCCTGT  
 Xeei TGGCGAGAGCTTTGAGTAGAGGTGACAGACCTACCGAGCCTTAGTTATAGCTGGTTGCCTGA  
 Pros TGGCAAGAACTTTGAGTAGAGGTGACAGACCTATCGAGTCTTAGTTATAGCTGGTTGCCTAA  
 Scmi TGGCAAGAGCTTTGAGTAGCGGTGACAGACCTATCGAGTCTTAGTTATAGCTGGTTGCCCAA  
 Rolo TGGCAAGAGCTTTGAGTAGAGGTGACAGACCTACCGAGCCCGTTATAGCTGGTTACCTAG  
 Cere TGGCAAGAGCTTTGAGTAGAGGTGACAGACCTACCGAGCCCGTAATAGCTGGTTTCCTAA  
 Daga TGGCAAGAGCTTTGAGTAGAGGTGATAAGCCTAACGAGCCCGTGATAGCTGGTTTCCTCG  
 Anco TGGCAAGATCTTCGAGTAGAGGTGACAGACCTACCGAGCCCGTAATAGCTGGTTGCCTAA  
 Dmve TGGCGAGAGCTTCGAGTAGAGGTGAAAGGCCGCCGTTATAGCTGGTTGCCTAA  
 Dmar TGGCGAGAGCTTTGAGTAGAGGTGAAAAGCCGCCGTAATAGCTGGTTGCCTAA  
 Anka TGGCAAGAACTTTGAGTAGAGGTGACAGACCTACCGAGCCCGTTATAGCTGGTTGCCTAG  
 Moja TGGCAAGAGCTTTGAGTAGAGGTGAAAGACCTACCGAGCCCGTCATAGCTGGTTGCCTAA  
 Hoja TGGCAAGAGCTTTGAGTAGAGGTGACAGACCTACCGAGCCCGTTATAGCTGGTTGCCTAA  
 Bede TGGCAAGAACTTTGAGTAGAGGTGACAGACCTACCGAGCCTTAGTTATAGCTGGTTGCCTAA  
 Bsp TGGCAAGAACTTTGAGTAGAGGTGACAGACCTACCGAGTCTTAGTTATAGCTGGTTGCCTAA  
 Mysp TGGCAAGAGCTTTGAGTAGAGGTGACAGACCTACCGAGCCCGTAATAGCTGGTTGCCTCG  
 Osja TGGCAAGAGCTTTGAGTAGAGGTGACAGACCTACCGAGCCCGTTATAGCTGGTTGCCTGA  
 Sgro TGGCAAGAGCTTCGAGTAGAGGTGACAGACTACCGAGCCCGTTATAGCTGGTTGCCTGA  
 Pzpa TGGCAAGAGCTTTGAGTAGAGGTGACAAATCACCGAGCATAGTTATAGCTGGTTGCCTAA  
 Zeja TGGCAAGAGCTTCGAGTAGAGGTGACAGACCTACCGAGCATAGTTATAGCTGGTTGCCTGA  
 Znne TGGCAAGATCTTTGAGTAGAGGTGATAAGCCGCCGACATAGTTATAGCTGGTTGTTTGA  
 Zefa TGGCAAGAGCTTTGAGTAGAGGTGATAAGCCGCCGACATAGTTATAGCTGGTTGTTTGA  
 Acni TGGCAAGAGCTTTGAGTAGAGGTGATAAACCTACCGAGCATAGTTATAGCTGGTTGCCTGA  
 Ncrh TGGCAAGAGCTTTGAGTAGAGGTGATAAACCTACCGAGCATAGTTATAGCTGGTTGCCTGA  
 Agca TGGCATGAGCTTTGAGTAGAGGTGACAGACCTACCGAACCTTAGTTATAGCTGGTTGCCTAG  
 Hydy TGGCAAGAGCTTTGAGTAGAGGTGATAGACCTACCGAACATAGTTATAGCTGGTTGCCCG  
 Gsac TGGCGCCAGCTTTGAGTAGAGGTGACAGACCTACCGAACCTTAGTTATAGCTGGTTGTCCAA  
 Pevo TGGCAAGAGCTTTGAGTAGAGGTGACAGACCTACCGAACCCGGTTATAGCTGGTTGCCTCG  
 Hiku TGGCAATGAGCTCCGAGTAGAGGTGATAAACCAAACGAGCTTGGTTATAGCTGGTTGCCTGA  
 Inpa TGGCAAGAGCTTCGAGTAGAGGTGAAAAACCTACCGAGCTTGGTGATAGCTGGTTGCCTGA  
 Auch TGGCACCATCTTCAAGTAGAGGTGACATACCTATCGAACCTGGCTATAGCTGGTTGCTTGA  
 Fico TGGCAAGAGCTTCAAGTAGAGGTGATAAACCTACCGAACCTTAGTTATAGCTGGTTGTCCAA  
 Macs TGGCAAGAGCTTCGAGTAGAGGTGACAAACCTACCGAGCCCGTTATAGCTGGTTGCCTCG  
 Moal TGGCGAGAGCTCCGAGTAGAGGTGACAGATCACCGAACCTTAGTTATAGCTGGTTGCCTGA  
 Syma TGGCAAGAGCTTTGAGTAGAGGTGATAAACCTACCGAACCTTAGTTATAGCTGGTTACCTGA  
 Maf r TGGCAAGAGCTTCGAGTAGAGGTGACAGACCTATCGAACCTTGGTTATAGCTGGTTGCCCGA  
 Dcpe TGGCAAGAACTTCGAGTAGAGGTGACAGACCTACCGAACCTTGGTTATAGCTGGTTGCCTGA  
 Dct i TGGCAAGAACTTCGAGTAGAGGTGACAGACCTACCGAACCTTGGTTATAGCTGGTTGCCTGA  
 Hehi TGGCAACGAGCTTTGAGTAGAGGTGATAAACCTACCGAACCTTAGTTATAGCTGGTTGCCCG  
 Stam TGGCAAGAGCTTCGAGTAGAGGTGATAGACCTACCGAACCTTAGTTATAGCTGGTTGCCTGA  
 Hogi TGGCGAGAGCTTTGAGTAGAGGTGAAAAACCTACCGAATATAGTTATAGCTGGTTGCCCGA  
 Erzo TGGCAGAGCTTTGAGTAGAGGTGACAGACCTACCGAACCTTAGTTATAGCTGGTTGTTCAA  
 Hxot TGGCGAGAGCTTTGAGTAGAGGTGACAAACCTACCGAACCTTAGTTATAGCTGGTTGTCCAA  
 Core TGGCGAGAGCTTTGAGTAGAGGTGACAAACCTACCGAACCTTAGTTATAGCTGGTTGTCCAA  
 Apve TGAGGAGAACTTTGAGTAGAGGTGACAAACCTACCGAACCTTAGTTATAGCTGGTTGTCCAA  
 Lat j TGGCAAGAGCTTTGAGTAGAGGTGACAGACCTACCGAACCTTAGTTATAGCTGGTTGCCTGA  
 Laja TGGCAAGAGCTTTGAGTAGAGGTGACAGACCTACCGAACCTGGTTATAGCTGGTTGCCTGA

Syja TGGGAA**GAACTT**CGAGTAGTGGT**GACAG**ACC**TATCGA**ACCTAGTTATAGCTGGTT**GCCTG**G  
 Epme TGGGAA**GACTTT**CGAGTAGAGGT**GACAA**ACC**TACCGA**ACTTAGTAATAGCTGGTT**GCCCA**A  
 Grse TGGGAA**GAGCTCT**GAGTAGAGGT**GACAG**ACC**TACCGA**ACTTAGTTATAGCTGGTT**GCCCG**A  
 Clja TGGGAA**GACCTT**TGAGTAGGGT**GATAG**ACC**TACCGA**ACTTAGTTATAGCTGGTT**ATCCG**G  
 Ogcy TGGGAA**GAGCTT**CGAGTAGAGGT**GACAG**ACC**TACCGA**ACTCAGCTATAGCTGGTT**ATCCG**A  
 Plna TGAGAA**GATCTT**CAAGTAGAGGT**GAAAC**ATC**TACCGA**ACTTAGTTATAGCTGGTT**GCTTA**G  
 Lema TGGGAA**GAGCTT**TGAGTAGAGGT**GACAG**ACC**TACCGA**ACTAAGTTATAGCTGGTT**GTCTG**G  
 Etzo TGGGAA**GAGCTT**TGAGTAGAGGT**GACAG**ACC**TACCGA**ACTTAGTTATAGCTGGTT**GCCTG**A  
 Apse TGGGAA**GATCTT**TGAGTAGAGGT**GACAG**ACC**TACCGA**ACTTGGTTATAGCTGGTT**GCCCA**G  
 Epde TGGGAA**GAGCTT**TGAGTAGAGGT**GACAG**ACC**TACCGA**ACCTAGTTATAGCTGGTT**GCCTG**A  
 Slja TGGGAA**GAGCTC**CGAGTAGTGGT**GACAG**ACC**TATCGA**ACCTAGTTATAGCTGGTT**GCCTG**G  
 Bsja TGGGAA**GAGCTT**CGAGTAGAGGT**GACAA**GCC**TACCGA**ACCTAGTTATAGCTGGTT**GCCTG**A  
 Ecna TGGGAA**GAGCTT**CGAGTAGCGGT**GACAG**ACC**TACCGA**ACCTAGTAATAGCTGGTT**GCCTG**A  
 Cohi TGGGAA**GAGCTT**TGAGTAGAGT**GACAG**ACC**TATCGA**ACCTAGTTATAGCTGGTT**GCCTG**T  
 Caar TGGGAA**GAGCTT**CGAGTAGGGT**GACAG**ACC**TATCGA**ACCCAGTTATAGCTGGTT**GCCCG**G  
 Came TGGG**GAG**AGCTT**CGAGTAG**GGT**GACAG**ACC**TATCGA**ACTCAGTTATAGCTGGTT**GCCCG**G  
 Mema TGGG**ACC**AGCTT**CGAGTAG**AGGT**GACAG**ACC**TACCGA**ACCTAA**TTATAGCTGGTTGCCTG**G  
 Lenu TGGGAA**GAGCCT**AGAGTAGAGGT**GAAAA**GCC**TATCGA**GTCTAGTTATAGCTGGTT**GCCTA**A  
 Brja TGGAA**GAGCTT**TGAGTAGAGGT**GACAA**ACC**TACCGA**ACCTAGTTATAGCTGGTT**GCCTG**A  
 Plma TGGGAA**GAGCTT**TGAGTAGAGGT**GACAG**ACC**TACCGA**ACCTAGTTATAGCTGGTT**GCCTG**A  
 Emst TGGGAA**GAACTT**TGAGTAGAGGT**GACAG**ACC**TACCGA**ACCTAGTTATAGCTGGTT**GCCTG**A  
 Ptti TGGGAA**GAGCTT**TGAGTAGAGGT**GACAG**ACC**TACCGA**GCC**CA**TTATAGCTGGTT**GCCTG**A  
 Losu TGGGAA**GAACTT**CGAGTAG**GAGT**GACAG**ACC**TATCGA**ATCTAG**TTATAGCTGGTT**GCCTG**A  
 Geoy TGGG**GAG**ATCTT**CGAGTAG**AGGT**GACAG**ACC**TATCGA**GCCTAGTTATAGCTGGTT**GCCTA**A  
 Dipi TGGGAA**GAGCTT**CGAGTAGAGGT**GACAG**ACC**TACCGA**ACTTAGTTATAGCTGGTT**GCCTG**G  
 Pama TGGGAA**GAACTT**TGAGTAGAGGT**GATAA**ATC**TACCGA**ACTTAGTAATAGCTGGTT**GTCTG**A  
 Leob TGGGAA**GAGCTT**CGAGTAGAGGT**GACAG**ACC**TACCGA**GCCTAGTTATAGCTGGTT**CCCTG**G  
 Neba TGGGAA**GAGCTC**CGAGTAGAGGT**GATAG**ATC**TACCGA**ACTTAGTGATAGCTGGTT**GCCTA**A  
 Pdpi TGGGAA**GAGCTT**TGAGTAGGGT**GACAG**ACC**TACCGA**ACCTGGTTATAGCTGGTT**GCCTG**A  
 Nimi TGGGAT**GAGCTT**TGAGTAGCGGT**GACAG**ACC**TATCGA**ACCTAGTTATAGCTGGTT**GCCTG**A  
 Uptr TGGG**ACC**AGCTT**CGAGTAG**AGGT**GACAG**ACC**TACCGA**ACTTGGTTATAGCTGGTT**GCCCG**G  
 Pesc TGGG**ACC**AGCTT**CAAGTAG**TGGT**GACAG**ACC**TATCGA**ATCTAGTTATAGCTGGTT**GCCTG**G  
 Baar TGGAA**GAGCTT**TGAGTAGAGGT**GATAT**ACC**TACCGA**ACCTAGTTATAGCTGGTT**GCCTG**A  
 Moar TGGGAA**GAACTT**TGAGTAGAGGT**GACAG**ACC**TACCGA**ACTTAGTTATAGCTGGTT**GCCTG**G  
 Toja TGGGAA**GAGCTT**CAAGTAGCGGT**GACAG**ACC**TACCGA**ACCTAGTTATAGCTGGTT**GCCTA**A  
 Chau TGGGAA**GAA**TTTT**TGAGTAG**CGGT**GACAG**ACC**TATCGA**ACTTAGTTATAGCTGGTT**GCCTG**A  
 Chse TGGGAA**AAGCTT**TGAGTAGTGGT**GACAG**ACC**TATCGA**ACTTAGTTATAGCTGGTT**GCCTG**A  
 Enar TGGGAA**GAGCTT**TGAGTAGAGGT**GACAG**ACC**TACCGA**ACTTAGTTATAGCTGGTT**GCCTG**G  
 Hpty TGGGAA**GAGCTT**CGAGTAGAGGT**GACAG**ACC**TACCGA**ACTTAGTTATAGCTGGTT**GCCTG**A  
 Nana TGGGAA**GAGCTT**TGAGTAGAGGT**GACAG**ACC**TACCGA**ACTTAGTTATAGCTGGTT**GCCTG**A  
 Mcst TGGGAA**GAGCTT**CGAGTAGGGT**GACAG**ACC**TATCGA**ACCCAGTTATAGCTGGTT**GCCTG**A  
 Rhox TGGGAT**GAGCTT**TGAGTAGAGGT**GACAG**ACC**TACCGA**GCCTAGTTATAGCTGGTT**GCCTG**G  
 Opfa TGGGAA**GAGCTT**TGAGTAGAGGT**GACAG**ACC**TATCGA**ACCTAGTTATAGCTGGTT**GCCTG**A  
 Paar TGGG**ACC**AGCTT**TGAGTAG**AGGT**GACAG**ACC**TATCGA**ACCCAGTTATAGCTGGTT**GCCCA**A  
 Gozo TGGGAA**GAGCTT**TGAGTAGAGGT**GACAG**ACC**TACCGA**ACTTAGTTATAGCTGGTT**GCCTG**A  
 Ackr TGGG**GAG**AGCTT**CGAGTAG**CGGT**GACAG**ACC**TACCGA**ACTTAGTTATAGCTGGTT**GCCTA**C  
 Elev TGGGAA**GAGCTT**TGAGTAGAGGT**GATAG**ACC**TACCGA**ACTTAGTTATAGCTGGTT**ACCTG**A  
 Trdu TGGGAA**GAACTT**CGAGTAGAGGT**GATAG**ACC**TACCGA**GCCTAGTTATAGCTGGTT**GCCTG**A  
 Amoc TGGGAA**GATCTT**TGAGTAGAGGT**GACAG**ACC**TACCGA**ACCTAGTGATAGCTGGTT**GCCCG**G  
 Hame TGGGAA**GATCTT**CGAGTAGCGGT**GACAG**ACC**TACCGA**ACCTAGTTATAGCTGGTT**GCTTG**G  
 Chso TGGGAA**GAGCTT**TGAGTAGAGGT**GACAG**ACC**TATCGA**ACTTGGTT**GCCTG**A

Lyto TGGGAAAGAGCTTTGAGTAGAGGTGATAGACC TACCGAACCTAGTTATAGCTGGTTGTCCA  
 Encr TGGGAGGAGCTTTGAGTAGAGGTGACAGACC TACCGAACCTAGTTATAGCTGGTTGTCCA  
 Bvar TGGGAGAGAGCTTTGAGTAGAGGCAACATACC TACCGAACCTAGTTATAGCTGGTTGCCAC  
 Noco TGGGACCAGAGCTTTGAGTAGAGGTGACAAACC TACCGAACCTAGTTATAGCTGGTTGCCAA  
 Chsp TGGGAAAGAGCTTTGAGTAGAGGTGATAAACCT TACCGAACCTAGTTATAGCTGGTTGTCTA  
 Arja TGGGAGAGAGCTTTGAGTAGAGGTGACAAACC TACCGAACCTAGTTATAGCTGGTTGTCCA  
 Pase TGGGAGAGAGCTTCGAGTAGAGGTGACAAACC TATCGAACCTAGTTATAGCTGGTTGCCTCG  
 Trel TGGGATGAGAGCTCCGAGTAGAGGTGACAAACC TACCGAACCTAGTTATAGCTGGTTGCCCG  
 Lifa TGGGAAAGAGCCTCGGGTAGAGGTGAAAAATC TACCGAACCTAGTTATAGCTGGTTGCCTCG  
 Acur TGGGACCAGAGCTTTAGAGTAGAGGTGACAAACC TATCGAACCTAGTTATAGCTGGTTGCCTCA  
 Ampe TGGGAAAGAGCTTTGAGTAGAGGTGACAGACC TACCGAACCTAGTTATAGCTGGTTGCCTCA  
 Urja TGGGAAAGAGCTTTGAGTAGAGGTGAAAGACC TTTTCGAACCTAGTTAATAGCTGGTTGCCTCG  
 Enet TGGGAGAGACTCTCAGGTAGAGGTGATAAACCT TACCGAACCTAGTTATAGCTGGTTGCCCGT  
 Ptbr TGGGAGAGAGCTTTGGGTAGAGGTGATAAACCT TACCGAACCTAGTTATAGCTGGTTGCTTCA  
 Safa TGGGAAAGAGCTTTGAGTAGAGGTGAAAAACC TACCGAACCTAGTTATAGCTGGTTGCCCGA  
 Icae TGGGAAAGAGCTTTGAGTAGAGGTGACAAACC TACCGAACCTAGTTATAGCTGGTTGCCTCA  
 Asmi TGGGAGAGAGCTTCGAGTAGAGGTAAACAAACC TACCGAACCTAGTTATAGCTGGTTATCTCA  
 Foal TGGGAAAGAGCTCCGAGTAGAGGTGAAAAACT TATCGAACCTAGTTATAGCTGGTTGCCTCA  
 Drze TGGGAAAGAGCTTTGAGTAGAGGTGAAAAGTC TACCGAACAGGGTTGATAGCTGGTTGCCTGT  
 Rhas TGGGAAAGAGCTTTGAGTAGAGGTGACAGACC TACCGAACCTAGTTATAGCTGGTTGCCTA  
 Elac TGGGAAAGAGCTTTGAGTAGAGGTGACAGACC TACCGAACCTAGTTATAGCTGGTTGCCTA  
 Kugu TGGGAAAGAGCTTTGAGTAGAGGTGACAGACC TACCGAACCTAGTTATAGCTGGTTGCCTCA  
 Plor TGGGAAAGAGCTTCGAGTAGAGGTGACAGACC TATCGAACCTAGTTATAGCTGGTTACCTCA  
 Sgun TGGGAAAGAGCTTCGAGTAGAGGTGACAGACC TACCGAACCTAGTTATAGCTGGTTACCTGT  
 Zaco TGGGAAAGAGCTTTAGAGTAGAGGTGACAAACC TACCGAACCTAGTTATAGCTGGTTGCCTCG  
 Zbfl TGGGAAAGAGCTTCGAGTAGAGGTGACAGACC TACCGAACCTAGTTATAGCTGGTTGCCCG  
 Spba TGGGAAAGATCTTCGAGTAGAGGTGACAGACC TACCGAACCTAGTTATAGCTGGTTGCCTCA  
 Game TGGGAAAGAGCTTTGAGTAGAGGTGACAGACC TACCGAACCTAGTTATAGCTGGTTGCCTCA  
 Thth TGGGAAAGAGCTTTGAGTAGAGGTGACAGACC TACCGAACCTAGTTATAGCTGGTTGCCTCA  
 Xigl TGGGAAAGAGCTTTGAGTAGAGGTGACAGACC TACCGAACCTAGTTATAGCTGGTTGCCTCG  
 Hyja TGGGAAAGATCTTTGAGTAGAGGTGACAGACC TACCGAACCTAGTTATAGCTGGTTGCCTCA  
 Psan TGGGAAAGATCTTTGAGTAGAGGTGACAAACC TACCGAACCTAGTTATAGCTGGTTGCCTCG  
 Cupa TGGGAAAGAGCTTTGAGTAGAGGTGACAGACC TACCGAACCTAGTTATAGCTGGTTGCCTCA  
 Mpch TGGGAAAGAGCTTTAGAGTAGAGGTGACAGACC TACCGAACCTAGTTATAGCTGGTTGCCTCA  
 Char TGGGAAAGAGCTTTGAGTAGAGGTGACAAACC TACCGAACCTAGTTATAGCTGGTTGCCTAG  
 Pser TGGGAAAGAGCTTTGAGTAGAGGTGACAGACC TACCGAACCTAGTTATAGCTGGTTGCCTCA  
 Prol TGGGAAAGAGCTTTGAGTAGAGGTGACAGACC TACCGAACCTAGTTATAGCTGGTTGCCCGT  
 Plbi TGGGAAAGAGCTTTGAGTAGAGGTGACAAACC TACCGAACCTAGTTATAGCTGGTTGCCTGT  
 Calu TGGGAAAGATCCTTTGAGTAGAGGTGACAGACT TACCGAACCTAGTTATAGCTGGTTGTCTCA  
 Papa TGGGAAAGATCTTTGAGTAGAGGTGACAAACC TATCGAACCTAGTTATAGCTGGTTGCTTCA  
 Sufr TGGGAAAGATCTTTGAGTAGAGGTGATAAACCT TACCGAACCTAGTTATAGCTGGTTGCCTCA  
 Stci TGGGAGGAGAGCTCTGAGTAGAGGTGATAGACC TACCGAACCTAGTTATAGCTGGTTGCCTCA  
 Taru TGGGAAAGAGCTTTGAGTAGAGGTGATAAACCT TACCGAACCTAGTTATAGCTGGTTGCCCGA  
 Rala TGGGAGGAGAGCTCTGAGTAGAGGTGACAAACC TACCGAACCTAGTTATAGCTGGTTGCTCG

\* \* \*\*\*\* \* \* \* \*\*\*\*\*



|      | 16    | 16'  | 17   | !    | HVR  |     |      |      |       |       |
|------|-------|------|------|------|------|-----|------|------|-------|-------|
| Scca | GAAAA | GAAC | TTTA | ATTC | TGC  | ATT | AATC | CCCT | ----- | TT    |
| Muma | GAAAA | GAAC | TTTA | GTTT | TGC  | ATT | AACT | CTTT | ----- | AC    |
| Erca | GAAAT | GAAT | AAAA | GTTT | CAGC | CTC | AAAT | ATTC | ----- | TA    |
| Pose | GAAAT | GGAT | AAAA | GTTT | CAGC | CTC | AAAA | AATC | ----- | TA    |
| Actr | GAAAT | GAAT | ATTA | GTTT | CAGC | CTC | AGG  | CTTC | ----- | TA    |
| Scal | GAAAT | GAAT | ATTA | GTTT | CAGC | CTC | AGG  | CTTC | ----- | TA    |
| Posp | GAAAT | GAAT | ATTA | GTTT | CAGC | CTC | AGG  | CTTC | ----- | TA    |
| Atsp | GAAAC | GAAT | ATTA | GTTT | CAGC | CTC | AGA  | CATA | ----- | CT    |
| Leoc | GAAAC | GAAT | ATTA | GTTT | CAGC | CTC | AGA  | CATG | ----- | CT    |
| Amca | GAAAT | GGAT | ACA  | GTTT | CAGC | TTT | AGG  | ATAC | ----- | TC    |
| Osbi | AAAAT | GAAT | TTTA | GTTT | CAGC | CAT | ATAG | CCTG | ----- | CT    |
| Pabu | AAAAT | GAAT | ATAA | GTTT | CAGC | CTT | ACAC | TCTC | ----- | CT    |
| Hial | GAAAT | GGAT | ATTA | GTTT | CAGC | CCC | ATGG | CCTT | ----- | CT    |
| Elha | GAAAT | GAAT | ATTA | GTTT | CAGC | CCC | ACGA | CCTG | ----- | CT    |
| Mlcy | GAAAT | GAAT | ATAA | GTTT | CAGC | CTC | CAGA | GCCT | ----- | AC    |
| Algl | GAAAT | GGAT | ATTA | GTTT | CAGC | CTT | ATGT | TATG | ----- | CT    |
| Ptgi | GAAAT | GAAT | ATTA | GTTT | CAGC | CTT | ACAC | TATT | ----- | CTC   |
| Alaf | GAAAT | GAAT | TTTA | GTTT | CAGC | CCC | ACCC | GTTT | ----- | T     |
| Nock | GAAAT | GAAT | TTTA | GTTT | CAGC | CCT | ACTC | GTTT | ----- |       |
| Anja | GAAAT | GAAT | GTTA | GTTT | CAGC | CTT | ATGT | AATT | ----- | CTAT  |
| Gyki | AAAAT | GAAT | ATAA | GTTT | CAGC | GCC | GTA  | ACTT | ----- |       |
| Syka | GAAAT | GAAT | GTTA | GTTT | CAGC | CTT | ATAT | ATTC | ----- |       |
| Opma | GAAAT | GAAT | GTTA | GTTT | CAGC | CCC | ACAT | ATTC | ----- |       |
| Comy | GAAAA | GAAT | ATGA | GTTT | CAGC | CTT | ATAA | GTTT | ----- |       |
| Sasp | GAAAT | GAAT | GTTA | GTTT | CAGC | CTA | ATAT | AATT | ----- | CTTTA |
| Eupe | AAAAT | GGAT | ATCA | GTTT | CAGC | CTT | AATT | AATC | ----- |       |
| Enja | TAAAT | GAAT | ACA  | GTTT | CAGC | CCT | GCCT | AGCC | ----- |       |
| Same | GAAAT | GAAT | AGAA | GTTT | CAGC | CCC | GTTT | CGCC | ----- | CT    |
| Chch | GAAAT | GGAT | AGAA | GTTT | CAGC | CTT | ATCC | CCCT | ----- | C     |
| Grgr | GAAAT | GGAT | AAGA | GTTT | CAGC | CCC | CAA  | CCAC | ----- | CT    |
| Caau | GAAAT | GGAT | AGAA | GTTT | CAGC | CTC | GTA  | TCCC | ----- |       |
| Cyca | GAAAT | GAAT | AGAA | GTTT | CAGC | CTC | GTA  | ACCT | ----- | CAAA- |
| Dare | GAGAT | GAAT | AAAA | GTTT | CAGC | TTT | GTA  | ACCC | ----- | C-    |
| Cost | GAAAT | GAAT | AGAA | GTTT | CAGC | CTC | GTA  | TCCC | ----- | TTTAA |
| Leec | GAAAT | GAAT | AGAA | GTTT | CAGC | CTC | ATAC | ACCC | ----- | TC    |
| CrIa | GAAAT | GAAT | AGAA | GTTT | CAGC | CTC | GCAC | CCCT | ----- | T     |
| Clmc | GAAAT | GGAT | AGAA | GTTT | CAGC | CTC | GTA  | TCCC | ----- | C     |
| Phin | AAAAT | GAAT | AGAA | GTTT | CAGC | CTC | GTA  | TCTT | ----- |       |
| Icpu | GAAAT | GAAT | AGAA | GTTT | CAGC | CTC | GTA  | TCTT | ----- | C     |
| Psto | GAAAT | GAAT | AGAA | GTTT | CAGC | CTC | ACAC | TCTT | ----- | TA    |
| Cora | GAAGT | GGAT | AGAA | GTTT | CAGC | CTC | ACAC | CCCT | ----- |       |
| Eisp | AAAAT | GGAT | AAAA | GTTT | CAGC | CTC | ATAC | TCTT | ----- | CACC- |
| Apal | GAATT | GGAT | AAAA | GTTT | CAGC | CTC | GTA  | TCTT | ----- |       |
| EsLu | GAAAT | GAAT | AGAA | GTTT | CAGC | TCT | ATGG | GCCT | ----- | CTC   |
| Dape | GAAAT | GAAT | AGAA | GTTT | CAGC | TCT | TGG  | TCTT | ----- | CT    |
| Glse | AAAAT | GAAT | AGAA | GTTT | CAGC | CCC | TGG  | CTCC | ----- | T     |
| Naar | GAAAT | GAAT | AGAA | GTTT | CAGC | CCT | TGG  | CTCC | ----- | C-    |
| Baoc | GAAAT | GAAT | AGAA | GTTT | CAGC | CCT | TGG  | CTCC | ----- |       |
| Opso | GAAAT | GAAT | AGAA | GTTT | CAGC | CCC | TGG  | CTCC | ----- | TCTAG |
| Alte | GAAGT | GGAT | ATAA | GTTT | CAGC | CCC | TAC  | CCCT | ----- |       |
| Plap | GAAAT | GGAT | AGAA | GTTT | CAGC | CCC | TAC  | CCCT | ----- | CAG-  |

Plal GAAATGAATAGGAGTTCAGCCCCCTAGCTTC-----TCAA  
 Sami GAAATGAATAGGAGTTCAGCCCCCTGGCTTT-----  
 Rere GAAATGAATAGGAGTTCAGCCCCCAACTTT-----  
 Gama GAAGCGAATAGAA GTTCAGCCCTTCAAGTCA-----CCCAT  
 Onmy GAAATGAATAGAA GTTCAGCCCCCGGCTTT-----  
 Sasa GAAATGAATAGAA GTTCAGCCCCCTGGCTTT-----CT  
 Cola GAAATGAATAGAA GTTCAGCCCCCTGGCTTT-----  
 Dita AAAATGAATAGAA GTTCAGCCCTTCTGAGTTC-----TT  
 Gogr AAAATGAGTAGAA GCTCAGCCCTCTGGGTTA-----TT  
 Chsl GAAATGAATAGAA GTTCAGCCCTCCGTATTC-----TCCAG  
 Atja GAAATGGATAGAA GTTCAGCCCTTCAAGACTT-----CC  
 lido GAAATGAATAGAA GTTCAGCCCTCAAGACTA-----TT  
 Auja GAAATGGATAGAA GTTCAGCCCTTTAGCTTC-----C  
 Chag GAAGTGGATAGAA GTTCAGCCCTCCGACCCT-----TC  
 Hami GAAATGAATAGAA GTTCAGCCCCCAAGATTC-----  
 Saun GAAATGGATAGAA GTTCAGCCCTTGACTTC-----CC  
 Nema GAAATGGATAGAA GTTCAGCCCTCCGATAAC-----CCTC  
 Disp AAAGTGTATATGAG GTTCAGCCCTTCCGGCTCC-----CCC  
 Myaf GAAGTGAATTTAAG GTTCAGCCCTCTGACTCC-----  
 Lagu AAAGTGAATATTAG GTTCAGCCCCCTGGCTGC-----CCC  
 Trtr GAAGCGAATATAAG GTTCAGCCCCCATCTTC-----C  
 Zucr AAAATGAATATAAG GTTCAGCCCCCGCCCTC-----  
 Pxja GAAATGAATAGAA GTTCAGCCCTTTAGCTTC-----T  
 Pxlo GAAATGAATAGAA GTTCAGCCCTTTAGCTTC-----TTAAC  
 Pctr AAAATGAATATAAG GTTCAGCCCTCCGGCCCC-----CC  
 Apsa GAAATGAATAAAA GTTCAGCCCTTTAACTTC-----  
 Cabe GATATGAATAGGAG GTTCAGCCCCCTGGACCC-----AC  
 Bzze GAAATGGATAGAA GTTCAGCCCCATGCCCTTC-----TC  
 Siim GAAACGGATATAAG GTTCAGCCCTTCCGGTTTC-----TC  
 Ctru GAAACGAATAGAA GTTCAGCCCTCTCAGGTTTC-----T  
 Dpbr GAAACGAATAGAA GTTCAGCCCTCCGGATTC-----TC  
 Caki GAAATGGATAGAA GTTCAGCCCTTTAAGCCAT-----TCC  
 Phja GAAATGAATAGGAG GTTCAGCCCTTTAA AATT-----CCC  
 Brsp GAAATGAATAGAA GTTCAGCCCTTATA AATT-----TTCCT  
 Gamo GAAATGAATAGGAG GTTCAGCCCTTTAA GTCT-----TTC  
 Lolo GAAATGAATAGAA GTTCAGCCCTCTAAGTCT-----TTC--  
 Batr GAATAAGTATAAGCTTGGCCCTTTGTAAACA-----  
 Prmy GAAATGAATAGAA GTTCAGCCCCGTAGCTCT-----TT  
 Loli GAAATGGATAGGAGTCC AACCCCTAGGTTTC-----TTT  
 Loam GAAATGGATAGGAGTTCAGCCCTTCTAAGTTC-----TTCA-  
 Chab AAATTGGATAAAA GTTCAGCCCTCCAGGCTTT-----TCC  
 Chto AAATTGGATAAAA GTTCAGCCCTCCAGGCTTT-----TCC  
 Majo GAAATGAATAGCAG GTTCAGCCCTTACGGCTTC-----TCC  
 Hlst GAAATGGATAGAA GTTCAGCCCTTCAAGGTTTC-----T-  
 Clpe GATTTGGATAGAA GTTCAGCCCTCCCGCTTC-----TT  
 Mlmr GACTTGGATAGAA GTTCAGCCCTCCGGCCCT-----T-  
 Crcr AAAATGAATAGGAGTTC CGCTTCTTAAATTC-----TT  
 Muce AAAATGAATAGGAGTTC CGCTTCTTAAATTC-----TTACC  
 Bege AAATTGAATAGAA GTTCAGCCCTTGAATTC-----TC  
 Mela AAATTGGATAGAA GTTCAGCCCTTAAAGTTC-----TC  
 Hats AAATTGAATAGGAGTTCAGCCCTTGAATTC-----TT  
 Orla GAAATGGATAGAA GTTCAGCCCTTTGGCTTTC-----C-

Cosa TAAATGAATAGAA GTTCAGCCTAT TAACTTT-----  
 Exsp GAAATGAATAGAA GTTCAGCCTCCTCCCTTC-----TT  
 Depa GAAATGAATACAA GTTCAGCCTAT TGC TTTT-----TTAAA  
 Rima AAATTGAATAAAA GTTCAGCCTT TATTATTC-----TT  
 Fuol GAACTAAATATAA GTTTAGCCTCT TATCTTC-----TTA  
 Gmaf GAAATAAATTTAA GTTTAGCCTT TAA TATC-----TCA  
 Xeei GAACTAAATAAAA GTTTAGCCTCT TATTTTC-----TC  
 Pros GAAATGGATATGA GTTCAGC CCCCTGGACTC-----CCC  
 Scmi GAAATGGATATAA GTTCAGC CCCCTAGATT-----TCCCG  
 Rolo GAAATGAATAGTA GTTCAGC CCCCCGACTTC-----CC  
 Cere GAAGTGGATAGAA GTTCAGC CCCCTAACTTA-----CC  
 Daga GAAATGGATAGAA GTTCAGC CCCCCAACTTA-----T-  
 Anco GAAATGAATAGAA GTTCAGC CTC CCGGACTTC-----CC  
 Dmve GAAATGAATATAA GTTCAGC CTC CCGACTTC-----CC  
 Dmar GAAATGAATATAA GTTCAGC CTC C AAGCCTT-----CC  
 Anka AAAATGAATAGAA GTTCAGC CTC CAAA TATT-----CCTA  
 Moja GAAATGAATAGAA GTTCAGC CTC CCGAATT-----CC  
 Hoja GAAATGAATAGAA GTTCAGC CTC CCGACTTC-----CT  
 Bede GAAATGGATAGAA GTTCAGC CCC CCGTATTT-----CCCAA  
 Bosp GAAATGGATAAAA GTTCAGC CCC CCGTATTT-----  
 Mysp AAAATGAATAGAA GTTCAGC CTC C AAGCTTC-----CC  
 Osja GAAATGAATAGAA GTTCAGC CTC C AAGCTTC-----CCACA  
 Sgro GAAATGAATTTAA GTTCAGC CCT C TAGATT-----CCA  
 Pzpa GAAATGAATAAAA GTTCAGC CCT CCGGCTTC-----CT  
 Zeja GAAATGAATAGAA GTTCAGC CCC CCGGCTTC-----C  
 Znne GAAATGAATAGAA GTTCAGC TCT CCGGCTTC-----CC  
 Zefa GAAATGAATAGAA GTTCAGC TCT CCGGCTTC-----  
 Acni GAAATGAATAGAA GTTCAGC CCC CCGGCTTA-----CT  
 Ncrh GAAATGAATAGAA GTTCAGC CCC CCGGCTTA-----CTG  
 Agca GAAACGGATAGAA GTTCAGC CTC CCGGCTTC-----T  
 Hydy GAAATGAATAGAA GTTCAGC CTT CCGGCTTC-----TC  
 Gsac GAAATGAATAGAA GTTCAGC CTC CCGGCTTC-----T  
 Pevo GAAATGAATAGAA GTTCAGC CCC ACCCTAC-----TTT  
 Hiku AAAATGAATAAAA GTTCAGCCTAT TATTATAC-----CC  
 Inpa GAAATGAATAGAA GTTCAGCCTCT TAACTTC-----TT  
 Auch AAAATGGATAGAA GTTCAGCCTT GCCCTTTTC-----CTCAG  
 Fico GAAATGAATAGAA GTTCAGC CCC ATACTTTA-----  
 Macs GAAATGAATAGAA GTTCAGC CTC ACCGGCTTC-----T  
 Moal GAACTGAATATAA GTTCAGC CTC CCGACTTC-----T  
 Syma AAATTGAATTTAA GTTCAGC CTC CCAAATT-----TC  
 Maf r GAACTGGATAGAA GTTCAGC CTC CAGGCTTC-----TT  
 Dcpe GAAATGAATAGAA GTTCAGC CCC ATAGCCAC-----CCT  
 Dct i GAAATGAATAGAA GTTCAGC CCC ATAA CCAC-----CCT  
 Hehi GAACTGGATAGAA GTTCAGC CCC CCGACTTC-----TTTAT  
 Stam GAATTGAATAGAA GTTCAGC CTC CCGGTTTC-----TT  
 Hogi GAATTGAATAGAA GTTCAGC CCC TCCGTTCC-----TC  
 Erzo GAAATGAATAGAA GTTCAGCCTT ATGGCTTC-----  
 Hxot GAAATGAATAGAA GTTCAGC CTT T CAGCTTC-----  
 Core GAAATGAATAGAA GTTCAGCCTCT TGGCTTC-----TT  
 Apve GAAATGAATAAAA GTTCAGCCTCT AAGCTTC-----TC  
 Lat j GAACTGGATAGAA GTTCAGC CTC CCGGCTTC-----TC  
 Laja GAAATGGATAGGA GTTCAGC CTC CCGGCTTC-----TCT

Syja GAACTGGATAGAA GTTCAGCCTCACGGCTTC-----TC  
 Epme TAACTGGATAGAA GTTCAGCCTCCCGCTTC-----TT  
 Grse GAATTGAATAGAA GTTCAGCCTCCCGCTTC-----TC  
 Clja GAAATGGATATGA GTTCAGCCTTCCGGGTTTC-----TC  
 Ogcy AAAC TGAATAGAA GTTCAGCCTTTATGAATT-----CTC  
 Plna GAACTGGATAGAA GTTCAGCCTCTTAGCTTC-----TT  
 Lema GAAATGGATAGGA GTTCAGCCTCTCGGATTC-----  
 Etzo GAATTGAATAGAA GTTCAGCCTCCCGGATTC-----TT  
 Apse GAAATGAATAGGA GTTCAGCCTTTGGCTTC-----TT  
 Epde GAATTGGATAGAA GTTCAGCCTCTCGGCTTC-----TC  
 Slja AAGATGGATAGAA GTTCAGCCTCATGGCTTC-----TC  
 Bsja GAAATGGATAGAA GTTCAGCCTCCCGGCTTC-----  
 Ecna GAAGTGGATATAA GTTCAGCCCTGTAAATTT-----CT  
 Cohi GAAATGAATAGAA GTTCAGCCTCCGAGCTTC-----T-  
 Caar GAACTGGATAGAA GTTCAGCCTTATAGCTTC-----TC  
 Came GAATTGGATAAAA GTTCAGCCTCATGGCTTC-----TC  
 Mema GAACTGGATAGAA GTTCAGCCCTACGGCTTC-----TC  
 Lenu GAAATGGATTTAA GTTCAGCCTCTGGCTTC-----TA  
 Brja GAATTGGATATGA GTTCAGCCTCTAGGCTTC-----TT  
 Plma GAATTGGATAGGA GTTCAGCCTCCAGGCTTC-----TC  
 Emst GAATTGGATAGAA GTTCAGCCTCCCGGCTTC-----TT  
 Ptti GAACTGAATAGAA GTTCAGCCTCCCGGCTTC-----  
 Losu AAAATGGATAGGA GTTCAGCCTTTGGGCTTC-----TT  
 Geoy GACCTGAATAGGA GTTCAGCCTCTGGGCTTC-----TTAAT  
 Dipi GAATTGGATAAAA GTTCAGCCCTTGGGCTTC-----TTCCC  
 Pama GAAATGGATAGAA GTTCAGCCTCACGGCTTC-----T  
 Leob GAATTGGATAGAA GTTCAGCCTCTGGGCTTC-----  
 Neba GAAATGGATATAA GTTCAGCCTACAGAATTCTTACTCCAGCCGTAAC TTTGACGTTGC  
 Pdpi GAGCCGGATAAAA GTTCAGCCTTAAAAATT-----CTT  
 Nimi GAAATGAATAGAA GTTCAGCCTTTCGAATTC-----TC-  
 Uptr GAAATGAATAGCA GTTCAGCCCTACGGCTTC-----TCC  
 Pesc GAACTGGATACGA GTTCAGCCCCAGGCTTC-----T--  
 Baar GAATTGGATAT-AGTTTCAGCCTCCCGGCTTC---TCTCCTCAACACGTCGAAATTTTT  
 Moar GAAATGGATAGAA GTTCAGCCTCCGAGCTTC-----TTTTT  
 Toja GAACTGGATAGAA GTTCAGCCTCCCGGCTTC-----TCC  
 Chau GAAATGGATAGGA GTTCAGCCTATGGGCTTC-----TT  
 Chse GAACTGGATAGAA GTTCAGCCTCCCGGCTTC-----TC  
 Enar GAATTGGATAGAA GTTCAGCCTCCCGGATTC-----TT  
 Hpty GAATTGGATAGAA GTTCAGCCTCCCGGCTTC-----T-  
 Nana GAATTGAATAGGA GTTCAGCTTCTAGGCTTC-----TTAA  
 Mcst GAAATGGATAGAA GTTCAGCCTCTTAGCTTC-----TC--  
 Rhox GAATTGGATACAA GTTCAGCCTCTCGGCTTC-----TC--  
 Opfa GAATTGGATAGAA GTTCAGCCTCCCGGTTTC-----T---  
 Paar GAAATGGATAGAA GTTCAGCCTCTCGGCTTC-----TTTAT  
 Gozo GAACTGGATAGAA GTTCAGCCTCCCGGCTTC-----TT--  
 Ackr GAATTGGATAGAA GTTCAGCCCTTGGGCTTC-----TT--  
 Elev GAAATGGATAGAA GTTCAGCCTTTGGGCTTC-----TCTA  
 Trdu AAAC TGAATAAAA GTTCAGCCCTTTAAATTTC-----TC--  
 Amoc GAAATGAATAGAA GTTCAGCCTCACAAATTTC-----TT--  
 Hame AAAATGGATAGAA GTTCAGCCTTTTAAATTTC-----  
 Chso GAAATGGATAGAA GTTCAGCCTTTTAAATTTC-----TTT  
 Lyto GAAATGAATAGAA GTTCAGCCTCCCGGCTTC-----TCTTT

|      |                                             |
|------|---------------------------------------------|
| Encr | GAAATGAATAGAA GTTCAGCCTCCTGCCTTC-----       |
| Bvar | GAAATGGATAAAA GTTCAGCCTTACGGATTC-----T-     |
| Noco | GAAATGAATAGTAGTTTCAGCCTCCCGCTTC-----TC      |
| Chsp | AAAATGAATAGAA GTTCAGCCTCCAAATTC-----TT      |
| Arja | GAAGTGAATAGAA GTTCAGCCTCTCGCTTC-----TC      |
| Pase | GAAATGAATAGAA GTTCAGCCCTTTGGCTTA-----TT     |
| Trel | GAAATGAGTAAAA GCTCAACCTGCGGATTC-----TC      |
| Lifa | GAAATGGAT-CTAGTTTCAGCCTCTTGGTTTC-----       |
| Acur | GAAGTGAATAGAA GTTCAGCCTCTAGTTTTT-----CT     |
| Ampe | GAAATGAATAGAA GTTCAGCCTCCCGCTTC-----T-      |
| Urja | CAATTGAATAGAA GTTCAGCCTCTTGACTTC-----TT     |
| Enet | GAAGTGGATAGGAGTTTCAGCCCTTTTAATTC-----T      |
| Ptbr | GAAATGAATAGAA GTTCAGCTTTTAAACTTC-----TC--   |
| Safa | GAAATGAATAGAA GTTCAGCCCTTTAATGCTC-----TT    |
| Icae | GAATTGGATAGGAGTTTCAGCCTCCAGGCTTC-----T-     |
| Asmi | AAAATGGATATGAGTTTCAGCCCTTTAATATTT-----C-    |
| Foal | GAAATGGATAACA GTTCAGCACTATTAATTC-----CTC-   |
| Drze | AAAATGAATAGAA GTTCAGCCTTTTATATTC-----T-     |
| Rhas | GAAGTGAATAGAA GTTCAGCCTTTTGAATTC-----TT     |
| Elac | GAAGTGAATAGAA GTTCAGCCTTTTAGCTTC-----TT     |
| Kugu | GAAACGAATAGAA GTTCAGCTGCCTCCTGGTTA-----TT   |
| Plor | GAATTGGATAGAA GTTCAGCCTCTCGCTTC-----        |
| Sgun | GAAATGGATAGAA GTTCAGCCTCCCGCTTC-----TTAA    |
| Zaco | GAATTGGATAGAA GTTCAGCCTCTCGCTTC-----TT      |
| Zbfl | GAATTGGATAGAA GTTCAGCCTCTAGGCTTC-----TTT--  |
| Spba | GAAATGAATAGGAGTTTCAGCCTCCCGCTTC-----TCTCT   |
| Game | GAATTGGATAGGAGTTTCAGCCTCCAGGCTTC-----T----  |
| Thth | GAATTGGATAGGAGTTTCAGCCTCCAGGCTTC-----TCT--  |
| Xigl | GAATTGGATAGAA GTTCAGCCTTTCGGCTTC-----TC--   |
| Hyja | GAATTGGATAAGAGTTTCAGCCTCCAGGCTTT-----CT--   |
| Psan | AAATTGGATAAGAGTTTCAGCCTCTAGGATTC-----TT--   |
| Cupa | GAATTGGATAGGAGTTTCAGCCTCCCGCTTC-----TCC--   |
| Mpch | GAAATGAATAGAA GTTCAGCTTTTGGTTTC-----TC--    |
| Char | AAATTGAATATAAGTTTCAGCCCCCTGCCTTC-----T----  |
| Pser | AAACTGGATATAAGTTTCAGCCTCCCGCTTC-----TC--    |
| Prol | GAATTGGATAGAA GTTCAGCCCTCTGGGTTTC-----C---- |
| Plbi | GAATTGAATAGAA GTTCAGCCCCCTGGGTTTC-----TC--  |
| Calu | GAGATGGATATTAGTTTCAGCCCTCTCTCTTT-----TT--   |
| Papa | GAATTGAATTTAAGTTTCAGCCTCTAAGCTTC-----TT--   |
| Sufr | GAAATGGATAGAA GTTCAGCCCCCTAGACCC-----TT--   |
| Stci | GAATTGGATAGAA GTTCAGCCCTTTTACTT-----        |
| Taru | GAAGTGAATATAAGCTCAGCCTTTTGGCTTC-----TT--    |
| Rala | GAATTGGATAGAA GTTCAGCTTCCTGGTTTC-----TC--   |

\*

\*

Scca C T A C T A A A T - - - - - A A G A A T C T T C T T A T T A A A G T T A A A C A - - - - - T A G A **G A T T A A T** A G  
 Muma T A T C T - A G A C A A G A A - - - - - T T T C T C G T C A A A G A A A A - - C T A T A A G **A G T T A A T** A G  
 Erca A G T A T A C - T A A A G T A C C A C C T A A - - - - - A A A A T T T - - - T A A - - - - - G A A C **A T T T G A C** A G  
 Pose A A A A T A T - - - - - A T A A G T A C T A C C T A A A - - - - - A A T T T T A A G A A A **G T T T G A C** A G  
 Actr C T G T C A C C C A G G T C A T T A C C A A C A A A G A C - A C C A A - - - - - G A A A A **C C T T A A G** A G  
 Scal C T G T C A C C C - - - - - A A G T T A T T A C C A A C C A A G A C A C C A A - - - - - G A A A A **C C T T A A G** A G  
 Posp C T G T C A A C C A G - - - - - G T C A T C A C C A A C A A A G A C A C C A - - A G A A A A **C C T T A A G** A G  
 Atsp C T T A A C - - C A C C C C A A G T G - - - - - C C T A C T C C A - - C C A A G G T G C C C G A C A A **T C T T G A C** A G  
 Leoc C C T A A C C G C C C C A A - G T A C T T A - - - - - C T T C A C C A A G G C - - A C T C - G A T A A **T C T T G A C** A G  
 Amca A A A C C A A C - - - - - T A C A G T G T T A C C A C C A A - - - A G A C A T A A A G T T A G **C C T T A A A** A G  
 Osbi C T A A - - - - C C A A A C T T - - - - - A C C C T A A A A A G A A A A C G A - G T A G **C T A T A A A** A G  
 Pabu A A A T C A A A A - - - - - A C A A A G A A T T A A - A G A G C C T **A C G T A A G** A G  
 Hial - T A G A T C A A A T G A T A A G A T A T T T A C C A A A T A A G A A C - - - - C A A A G - - A T A A **C C A T G A C** A G  
 Elha T A A A T C A A A A A G T T A A T T C T A C C A A A G A A T T - - - - - A G A G A C A G **T C C T G G C** A G  
 Mlcy T T A A A T C A A A C A C C A - - - - - C A C C A A A G A C T A A A A G - - - - - A C A G **C C C G G A C** A G  
 Algl T T G G T C A A T G G G T G G G T C G C C T A T T A A G G - - A T G A - - - - - G A G T C A G **A G A T A A G** A G  
 Ptgi A G A T C A G G A A A C C A C C A C T G A T - - - - - A A A G A A C - - C - - - - - A G A G T A A T **A T G T A A G** A G  
 Alaf - - - T T A A A T C A - - - - - A A A A T A C C C A A A A A - - - - - G A A T A A A A G T T A C **C C G T A G C** A G  
 Nock T T A A A T C A A G T T T - - - T A C T T A A C A A G A A T A A A - - - - - A G T T A C **C C G T A G C** A G  
 Anja A A C C A A A A C T T - - - - - A T T A A C A A A A A G A C A A A A G C A A T **A C A T A A G** A G  
 Gyki - - - - C T A A C C C - - T A T A T A A A A A G A G G A A A - - - - - G C A A G **A C A C A G C** A G  
 Syka T A A A A C C C A A A A C C - - - - - C - - - - - A A A C A A T A A G G - G C C C A A G T A A T **A C A T A A G** A G  
 Opma C T T A A A C C - - - - - A A T A C A C A C A C A A C A A G G A A C - - - - - A A A G T G A T **A T G A G G C** A G  
 Comy - - - C T - - - - - C A A - - A A A T C A A A A T A A A A G - - - A A T - A A - - - A G T A A C **A C A T A A G** A G  
 Sasp A C T A - C A C A C C C - T A A A A - A G A - - - - - C A A - - - - - A A G C A A T **A T A T A T C** A G  
 Eupe - C T A T A A T T A C A T C A T A T A C A C - - A T A A A A T A A T - - - - - A G A G A A **A C T T A A G** A G  
 Enja - C G A C T C A C A C C A G T T T T A C G A A A - - - A A A G A C A A A - - - - - G A G C T C A C **T C C C A G C** A G  
 Same C A C C C A C A - A C A G T T - - T T A C - - - - - T T A - A A C A A G G C - A T G A - G G A C A C **C C C C G G C** A G  
 Chch C A G T C A C C G A T G T G C C - - A - - - - - C T A C T A C T A G A C A C C C A A G A G A G A C **C G A T A A G** A G  
 Grgr T A G G C C A C C T T A A G G T C A C T C A C A T G C A C C T G C - C A C A G G C C T C A A G A A A G **A T G C G G C** A G  
 Caau - - - C A A A T - - - - - C A A G T A A C A T T A A C A A G A C A A C A A G A - - - G A A A T **A C A C G A C** A G  
 Cyca T C A C A C A A A C A A A T A A - - - - - G A C T - - - - - A - A G A G A A A C **A C A T G A C** A G  
 Dare - A A A T T A A A A A A T T A A A T T T A A T T T A A C A C A A A A T T A A G A G - - - - - A A A A **A T A C G A A** A G  
 Cost T C A T A - - C A A G T A A T A T C T A A C T T A G A A - - - A A - T A - - - - - A G - - - - - A A A A **G C A T G A C** A G  
 Leec T A A T C A A T T A A G A - - - A A C A T C T A A A T T A A G T A A A - - - - - A A G - - - - - C A A A **A T A T G A C** A G  
 Cr la G A - - - - G T T A A A T A A G A A A C A C T C T A A C A T A A C A C A A A A - - A G - - - - - A G A A **A C C C G A C** A G  
 Clmc A G C T C A C A C A A G C A C - - - C A G C A C G C C A T G A G A C C - - - - - G A - - - - - G A A A C **A C A C G A C** A G  
 Phin C A C C T C - - C T A - - - - - G A C A A C T A T G A A - - A C A G A G A A A A **A C A C G A C** A G  
 lcpu A T - - - - C T C A C A A A T A C T T T T A T - - - - - A T T A A C G A G C C C G A G - - - - - A A A C **C T A C G A A** A G  
 Psto A C T C A A A A A - - - - - T A A A T - - T T A A A T A C A C G A G A T A A A G - - - - - A A A T **A T G T G A C** A G  
 Cora C A A G C C A A T A T T C A A C A G T A T T A T G A C A A - - - - - C G A G C A A G **A T A T G A C** A G  
 Eisp T C A C A C C A C A T C T T T A T G T C - - - C C A C G A - G - C C C G A - - - - - G A A A C **A C A T G A C** A G  
 Apal C C G C C C A A A - - - - - C A T C A C C C A C A A C - - - A C G A A C C A G A G A A A C **T T A C G A C** A G  
 Es lu A A - - - - T A C C C T T A A - G G T A A A A C T A - - A T T T T G T T T A C - - A A - - - - - G A G C **C C A A A G A** A G  
 Dape T C C T C C - - - - C C A A A A G T A A C - - - - - A C T A A A T T T G - T T T A C - A - A G A G A **C C A A A G A** A G  
 Glse C C A A C C T T T T A A G - - - - - T T T A T C T T - - - A C T C C G G C C C T G A G G A A A **C C A C T G C** A G  
 Naar - C A A G C C C C G A - - - - - A A G T T T T T C T A A C G - - - - - C C G G C C - - - - - C G G T G A C A **C C A C A G G** A G  
 Baoc - C T A A G C C C C G A A A G T T T A T C T T A C C C C G G C C T C - - - - - A G T G A A A **C C A C A G G** A G  
 Opso C C C T T A A A G T A C T - - - - - A C T A A G - - - - - A C C G G C C - C T G - - - - - A A G A A A **C C A C T G C** A G  
 Al te C A G G T C A C - - - - - A A C A G T A A C A C G A A T A C T A G A C - C A C G A G A A A A **G A A A G G C** A G  
 Plap T C A C A A A A G T A A C A C A A A T A - - - - - C T A G A - - - - - C C A C - - - - - G A G A G A A **G A A A G G C** A G

Plal ATCCCTAAGATCCTT----CTT-----CTAG-----TGATTAAGAGAAA**CCG****GGG**AG  
 Sami ---TCAAG---CCCATGAGAACCTTCTTCTTAA---GGCGAA--GAGAAA**CCG****GGG**AG  
 Rere -TCAAGTCATTAAGACCCTACTTTTGTGATTCC-----GAGAAG**CTG****AGG**AG  
 Gama CCTCCCAAGTGAAACCTGCTTT----GGTG-CC-----G---GAGAG**TTG****AAG**AG  
 Onmy CTTAG---GACCTTAAGGTA-----AAACTAATATT-GTCCC-AAAGAAA**CCA****GG**AG  
 Sasa TAGGAC-CTCAAGGTA-----AAACTAACCTTGCCCAAAGAAA**CCA****AG**AG  
 Cola CTTAGGACCCTAAGGTAATAACTAACCTCGTCC-----CATAGAAA**CCA****AGG**AG  
 Dita AAACCCCC-----CCGGCGCA---CGACA-CCTGGGCTGCAGAAG**TTA****CA**AG  
 Gogr TT----AGCCCTAAGTTCTTCT-----AATGC---TAACTTAAAGGAA**CCA****GA**AG  
 Chsl CCTCCCCCATGACCCCACTAAC---TTCG-GCC-----CCAGAAT**ACG****AG**AG  
 Atja TCCCCCGC-----CACTAGTATAA---CGAACAGTTGGCCCCAGGAAA**CTA****GA**AG  
 lido CCTCCCCCACCCTCGTA-ACACAACAA-----T---TGGCCCCAGGAAA**CTA****GA**AG  
 Auja CCTCCCAA-----TTCACCC---CCTATATTGGT---CACAGGAAA**CTA****AAG**AG  
 Chag CCGCCCCG-ACTGCTCCAAGC-----AC--GCTCGGCCCG-GGATCAA**GGC****AGG**CG  
 Hami -CCGAGCC-----CCCACTACGACTT-AAGGAAT**CTT****AGG**AG  
 Saun AACCC-----CTCCCT-----CAGGCC-----CAGGGAAG**CTC****AAG**AG  
 Nema AGTCCCGTAAATACTATTTAAC---CCA-----GACCACAGGATCAG**TCG****AG**AG  
 Disp CATCCAAGA-----CATTTATGTCCCCCTGGACC--AACTG---CGTA**CCG****GA**AG  
 Myaf -TTACATCAACGGCGCCACGCCACCATAGATT-----GACGGCAG**TCA****AG**AG  
 Lagu CG----CTAAACTAGGCCAC--ACCCCC-CTAGTGCC----AG----GTAA**CCA****AGG**AG  
 Trtr ACTAGCCCCCATAATGTATGTT-----AAACCTTTGGCTAGGG-TGTTAAG**TCT****G**AG  
 Zucr -CCCTAGCCCC-TATAATAGACG-TAAAATCATTGGCTAT-GGT--ATTA**AGC****TGG**AG  
 Pxja --TAACCCAAACCA-GAATTAC-----CCAGACCTGGGCTC---AAGAAA**CTA****AAG**AG  
 Pxlo CCAAACCAGACTT---ACCCAG-----ACCTGGG-----CTCAAGAAA**CTA****AA**AG  
 Pctr ACCCCAAGCGGG-----ATAACCCC-GCCAG-GCCCCGGAGGAG**CCA****AGG**AG  
 Apsa ---TTA--ACCCCTAGACGATAATCCCCAA-CAG-GCAA-T---GAAAGAC**TTA****AA**AG  
 Cabe ----AGTCCAAC-----AA-----ATACACAAGGGCCCC--CACAGGC**CCG****GG**AG  
 Bzze ----CCTTCCAAGCGTT--AA-----CTCAGCTTGACCA---AAAGAAG**ACA****TCC**AG  
 Siim ----CACTCCA----AATTAAC-----ATAAGCTAGGACAAAA-AGAACCG**CCG****CA**AG  
 Ctru CCCCTCAA-----ACCGACCAACTGTGTC-CGACA--CTAAGAAA**CTC****GG**AG  
 Dpbr CCCTCGAACCACCCT-----TACTGACCCCGACACTAAGAACG**CCG****CG**AG  
 Caki CCGC-----CCACAAAACACCACGGTA-----AAGGAAA**ATT****AAG**AG  
 Phja TC----ATCCCATAGTTATTACACAA-TT-----TGATAAAGGAAA**TTA****AAG**AG  
 Brsp AATTCAAACTTCAATTTACCTTGT--AATTTTCAGAAAAGACTTAAGGAAG**TAT****CA**AG  
 Gamo CCCCCTCACCCAT--GCTTA--CGCTAAAATT-----GATTAAGGAAA**CTA****AAG**CG  
 Lolo CCCC--TCACCCATGCTTACGCTAAAATTGAT-T-----AAGGAAA**CTA****AG**AG  
 Batr -----AGAAAACCC-----CAAATAG--GC-----CCCCCTGT**AAC****AAA**AG  
 Prmy AATTCTACTAA-----TAGAACCT-----AAAGAA**CTA****CTG**AG  
 Loli CACCCA---TT-----TTGATACTCAAGGCCCAAAGATA**CTA****CGT**AG  
 Loam CTCCAACCCTTAAATTA-----AGGTGA-----AAAGAAG**TCA****GA**AG  
 Chab GATCACATTTCTTTT-TTCTATCTGATCTCGGTTGTC-----AACAAAA**CCT****G**AG  
 Chto GA----TCACATT---TCTTTTTTCTATCTGATCTCCGTTGTCAACAAAA**CCT****G**AG  
 Majo TCTCAACTC-----TGAGTTCTTTTACCGACAGTTAAGA---ATA**CCG****TAG**AG  
 Hlst -----CATACAAAACCCCTAG---ACCCAGGACT-----AGAGAAA**CTA****CA**AG  
 Clpe TCTTTTCGACC-----TTCACATGACCCCATTTGATCAAGAAGACC**ACG****GG**AG  
 Mlmr -TCCACCACACTTTCAAATGACCCCTTCTGG--CCAAGAA-----GAAG**CCG****AG**AG  
 Crcr ACCCCCCTCGATTTTAT--CCCCTATAACAGACAGTAGAATATCAAGAAAA**TTA****AG**AG  
 Muce CCCCTCGATTTTATCCCCTAAT---AACAGACAGCAGAATATCAAGAAAA**TTA****AG**AG  
 Bege AAGCC---CAAAGTGGCTACCCTCAGCTAAGACTA-----AAA---GAAA**TCT****AG**AG  
 Mela CCCTCACCTTGATATC-----TTTCTAAGTGAGACACCAAGAAA**TTA****AG**AG  
 Hats ---TCTTCCTTAATAGTTGTT-----CTTAAT--TAAGACACAA-AGAAA**TCT****AG**AG  
 Orla -TAAATTTAAGTCTAGCATTACTTAATACAAATGA-----CTAGGAA**TCA****AA**AG

Cosa ---TTATCT--CCCAACTGGCTCACCTAAAAGCT-AAATATC--AAGAAGTTAATAGAG  
Exsp GCCCCTAT-----TATGGAAACACCTTA-ATCC-AGAGAAAAAGAAGAGAAGAGAG  
Depa CCAACCATAATCATT----TAT-----TTA-GGCACCTAAAAACAATAGAG  
Rima TA----ATCAAAAC-TAATTTAATTTAACTAGAC-----ACAAGAAATATAAAGAG  
Fuol CACCAAAG-----TGGACACCCTAATTT----TAGGT-TCTGAGAAGACACTGAGAG  
Gmaf TA----CCCCAACGGCCTA--ACCAACAGCCCCGGCC-----AAAGATTATTAAAGAG  
Xeei CCCCCAAC-----CTCTTGGTCTCCTTAGACCAGGTCCAGAGAAGCTATAAGAGAG  
Pros GC----CCAACCCAGTCTTCACTCAAGCTGGATTGAGTCTT----CAAGCCAGGGGTG  
Scmi CCCCCGCCAGTCTT---CACTAAAAGTGGACTAC-----AAGGCAAGCTAAGGGTG  
Rolo ATCCCACCC-----TAGCCTCACTCAACCTGGATG----CC-GGTTAAAACCGAGGGAG  
Cere ----ACACCAACCCTATCTTAG-----TTCTATTGCGGGCTAC--AGTAAATTAAGGGAG  
Daga -TAGCCA----CCCCGGCAT--ACTAAGCCCGG-----CTTTAATAAGTTAGAGGAG  
Anco AAC----CAAACCAG-----TCTCACCCG-----ACTTGGCCCCAGGAAGCCAGAGAG  
Dmve ACCCCAAGCAAGT-----CTCACCACATTGGCCCTAGGAAGCCAGAGAGAG  
Dmar CACCCCAAGCAAGTCTCA-CCCACATTGGCCCT-----AGGAAGCCAGAGAGAG  
Anka CCCCCAATCAGTTTT----ACTAACTTGGCT--C-----AAGGAAACTTCGAGAG  
Moja CACCCCAAAGTACTGTC-----TTACAAGCCTTGGCC--CAGGAAAACCGAAGAG  
Hoja AATCCAAACTAGTCT-----CACCAAATTTGGC-CCCAGGAAGCCAGAGAGAG  
Bede CC----CAACCCAGTCTTTACTTAAGCTGGAC-----ATCAGGCCTAGCCAGGGAG  
Besp ---CCCAAC--CCAACCCAGTCTTTACTTAAGCTGGATATTTAGGCTTAGCCAGGGAG  
Mysp AACTCAA-----ACAACCCCTA--CCATTAAC-GAAAACAGGAAACTCAGAGAGAG  
Osja CTCAAGCAACACTAATTTACCATGA-----GTAT--AGGAAAACCGAGAGAG  
Sgro AATCAAACCGAATC-----ATCTATGCACG--TACC-----CG-GAAAACTACAAGAG  
Pzpa AATCCAC---CTAGTACCAC-----TAATATTG--GCTACA--GGAATAACAGATGAG  
Zeja TACCCAC-----CTTAGTA--CTACTAAATTACGGCTACAGGAAAACAGAGGAG  
Znne AACCCCCCTTAGTATA--AC-TAATATTG--GCC-----CAGGAAACTACAGAGAG  
Zefa ----CCAAC--CCCCCTTAGTACCAC--T-AAAATTGGCC--CCAGGAAAACAGAGAG  
Acni GCCCCACCTTAGTAC---TACTAAAATTG-GG--TACA-----GAAAACAGAGGAG  
Ncrh CCCCACCT-----TAGTACTACTAAAATTG-GA----CACAGGAAAACAGAGGAG  
Agca ----TACTCATA----TACGTGCAACTCCTTTATGACATGTTAAGTAAACCGAGAGAG  
Hydy TTTTCACCCCGGCCCT--AACACCAATTGATGATAT-----AAGAAAACCGAAGAG  
Gsac CTTTTAC-----ATTAGTCTAACACCTATTGATGTATTTAAGAAAACATGAGAG  
Pevo AA----CCGACCAAG-CATC--GCCTGAATTGCTTAC-TA-AG----ATAGCCGTGGGAG  
Hiku TAATTCACCTAAAATT--T-----AAATGAATA-GATTGAGCTAAATGATAATAATAGAG  
Inpa TTTCCCGCCTCTTTTCCC-----TTTTACAAATTGGCCA-CAAGAAGTTAAGAGAG  
Auch CCACCCCTACTTTAGTCTCCACTCATAG-----GAATCTAACGAATAACCGAAGAG  
Fico ---CCTCG--TC-CCACAGT-TTCACTTCTT--TAGTCA---CAGGGCAAATATCCGAG  
Macs CCACTC----ACCTCAGTACT-----ACTTAGTCTGACAC-T-ACAGAACCTTTGAGAG  
Moal ----CTAC-----ACACTATCACACCCAGACAGTTACTAAAGAACAACCGAGAGCG  
Syma CATAACAACA-----CCACC-TTAGTTAACAAAGAAGTTGAGAGAGAG  
Maf r TATTC---CCCG-----AC--ACCCA-ACGA-TAAC--AAGAAAACAGAGAGAG  
Dcpe GT----CTCACTTCACTT---ACTCATATTGACACAAG--AA----GAAAATATGGGAG  
Dct i GTCTCACCC-----CAGTTAACTCCGATCGACAC-AA----GGAGGGGCTATGGGAG  
Hehi TCAAATCAGTATTACCCACCT---GA-----TA-ACA---CAAGAAGCTGTGAGAG  
Stam TTTTCACTACGGAATAACCC-----CTCCCTGAT-AACCCTTTAAGAAAACCGGAGAG  
Hogi TCTTCATCTTCGTTT---ACCCTAACTGATATCAA-----AGGAACTGAGGGAG  
Erzo TCACTTCACCTTAGTTTTACCCCTATCGATGCA-----TAAAGAAAACATTAAGAG  
Hxot TCTTTTCACCTTAGTCTGACCCCTATTGATGCAT-----TAAAGAAAACCGAAGAG  
Core TG----TTCACACTAGTCTAACCCCTAAATTGATGCG--TAAA----GAAAACCAACAGAG  
Apve TTTTCACTTGGCCT-----AACCTCTACAGATGCATTAAGAAAACAGAAGAG  
Lat j CATTCATACATTATTCTAAAT-----GATTACCCCTAGATGA-AAAGAAAACCGGAGAG  
Laja ATTCAAAGCCTATTAACCGCCAAACAAAACGATAGATGCAAGA---GAAAACCGAGAGAG



Syja CCTTCTCC-----CCCTCCCCTCAGATACC-----A----AAGAAA**CCATGAG**AG  
 Epme CCTTCTC---TAATTCCTTAC-----TTTTAACAG-ATACTG-TGAGAAA**CCGGGAG**AG  
 Grse CACTCCACCCCTGGTT-----CCACCGCCAATGATCCAAAGAAA**CCGCAGAG**AG  
 Clja -----ACCGCACACCTCCA-ACCATA-CC---GCCATCTAAA----GAAA**CCAGGAG**AG  
 Ogcy CA----ATCACAGCCTAACTTATTCAAGTCTACTCCCCGAATAAAAGATT**CAGAAG**AG  
 Plna TATTC--C-----CCCCAATATTTTATACAATAAGATAATTAAGAAG**CTAAAG**AG  
 Lema -TTACCTCACTCTCGTCTAACACCCAACATTGACCCGAAA-----GAAA**CCGCAGAG**AG  
 Etzo TA----TTCACCTCAGTATTACC-----CCTTCTGATACCTAA----GAAG**CGAAGAG**AG  
 Apse TC----CACACATGCCGGTTACACCG--AAAGCATTTA--AG----CAG**TCAAAG**AG  
 Epde TCTTCACCCCCCCCCCATATCT----TGGTCTTACCGATATTTAGAGAAA**CCGTGAG**AG  
 Slja TCCTCAACACCCGGAG--GCACTGCCTACATCATAAGGATAATTTAGAAA**CCATGAG**AG  
 Bsja ---TCCTC--TCACCCCAAATACTT-----CAGACACCA-A--AGAAA**CCGAGAG**CG  
 Ecna TTCTTCAT-ATATTTACTTCC-----TTA-AA---TGAT--CACAAGAAA**TTATAG**AG  
 Cohi CTCTTCACCTATTGTA-----CACACAAA--ACAATGATTTAG-AGAAA**CTGTGAG**AG  
 Caar CTTTCATACTAATAC-----T---AAATACCGAACGATAAAAAGAAA**CTGTAG**AG  
 Came CCTTCAT---ACAATAATAA-----CAACCCAAT-GATTAA--AAGAAA**CCGTGAG**AG  
 Mema ----CTTCCCAACCCGTTCCAA-----CACACCCCTGGCACTTTAGAGAAA**CCGTAG**AG  
 Lenu CATTCAAACCATACA-----CATCAAGAACC-----CAAGAAA**CCAGGGG**AG  
 Brja TCCTCCCCCGGA-----CCTTACCAAC-ACCGACACCTAAAGAAA**CCAAGAG**AG  
 Plma TCTTCACT--ACGGTCTTT-----CACCCCTACCGACACACAAAGAAG**CCTAGAG**AG  
 Emst TCTTCACCCCTCCGTCTAAACCCCATTTTGACACCT-----AAAGAAA**CCGAGAG**AG  
 Ptti TTTCTCC-----CCCTCCGTCTTACCCCTTT--T-GACACAAAGAAA**CCGAGAG**AG  
 Losu TACTCACTAAGCATCTTACAATTCACGTACTATGAAGCGGACAACAAGAAA**CCCATAG**AG  
 Geoy TCCCCTACCTATTTCTTCTCAATCCCA-----CGATATTAAGAAA**CCCTGAG**AG  
 Dipi TCACCCCTTGTCAT----CCC-----ACA-----TGACCCCTGAGAAA**CCAAGAG**AG  
 Pama --TACTTCAAATTTTCGTATAAA----CCTTAATTAGATTTCT-AAAGAAA**CCGAGAG**AG  
 Leob ---TCCCC--TCACTTTAGTATTTACTCCTTA-CAGA-CAACC-AAAGAAA**CCTTGAG**AG  
 Neba TGCTCTAACCAGCAGCATAATTTATTGAAACCTTTAAGAGATAAAAAGAAA**TCTGTAG**AG  
 Pdpi CA----CTCGAAACAACCTCAAATTTGTATAGACATACTTCAA----GAAA**CTTTAG**AG  
 Nimi CCCTCAACCCCGTCTT-----CACCCCG-GACAACCAAAGAAA**TCGAAAG**AG  
 Uptr TC----TCAACTCTG-TAGT--ACTTTTACCGACAGCCTA-AG----AAAA**CCGTAG**AG  
 Pesc -CCGCTCATCC--CCCAGCCATTATCCCGATTA-----AGAGAAA**CCAGGGG**AG  
 Baar AACACTATCGTTAAAG----CCCCCTTCTGACACCCCCCCCCCCAGAAA**CCGTGAG**AG  
 Moar TCACTTTT---CGTTTTCAACCCCT-----TTTTGATACTT---AAGAAA**CTGAGAG**AG  
 Toja ACTCATCTCCGTTATACGCTATCCCCTCCCGACACT--CA----GAGAAG**CCGTGAG**AG  
 Chau TACTCTGCCCCCTTCCCCCCCCCTTTTTTACCCGGACGCCA-AGAGAAA**CCAATAG**AG  
 Chse CACTCACACCTTATC---TTCTAACCCATTAGACACTTT-----AAAGAAA**CCGAGAG**AG  
 Enar TACTCGTTTCTGTCTTAACCCTTTTCTGACACTAT-----AAGAAG**CCGAGAG**AG  
 Hpty -TTCTTCACCT--TGTCTCAACCCTCCCATTGACACCT-----AAAGAAA**CCGCAGAG**AG  
 Nana CTCATATCGG-TAT--CACCACCC-----CAGA--CTTT-----AAGAAA**CCAAGAA**AG  
 Mcst ATTTCAACTCCGCTGG---CCCGTCCCGACACCT-----AGAGAAA**CTAGAG**AG  
 Rhox CCGTTAATCTGTTGACTCACCCCTCCTTCCCCCTGAA-CGCCAAAAGAAA**CCAAGAG**AG  
 Opfa -CTAGTCACCTTCGTCCAACCC-----ACTCAGACACC-TA-A-AGAAAAC**CCGCAGAG**AG  
 Paar TCACACTTGTTCT--TACTTAA----ACAGATA-----TAAGAGAAA**CCGAAG**AG  
 Gozo TCCTCACCCCTTCGTCTTTA-----CCCCTACTGACGCC- AAAGAAA**CCGCAGAG**AG  
 Ackr -----ACC----CTTCCCCTAACCTTCCCCGGATTATA----GAAG**ACATGGG**AG  
 Elev GTCATAGTAGATATTA-----GACCCCAA-----GAAA**CCAAGAG**AG  
 Trdu CA----TTCCATTGGCCTAAGGCCTTACACCCGAACAA--AA----GAAG**TTAAGG**AG  
 Amoc CCCCTC---AACTGTCTTTTA-----AGGCGTTAGATTAAG-AAAGAAG**TTAAGAG**AG  
 Hame ---TACCC--TCAACTAGGAACACC--TCAAACCCGC-CAATTA-TAGAAG**CTAAAG**AG  
 Chso ATTC-----ATAA-----CCAAACAGATAATAA-----GATAC**TAAAGAG**AG  
 Lyto TCACCCCTAGGTTAACCCCTATC----GATGTACT-----TAAGAAA**CCGGGG**AG

Encr TCTTTTCA-----CTTTAGTCTAACCC-CTATTGATGTGCTTAAGAAA**CCGAGAG**AG  
 Bvar CCCTTCATTCATAGGGGCAGACCCCTACCACCCCTGATAGCCTTAAGAAA**CCATTAAG**AG  
 Noco CGTTCACCTCAGTGTAC-ACACATTCTGATGTTT-----CAAGAAA**CCGTGAG**AG  
 Chsp AC----ATCCCATAAACAATACTTTAAAAATAAAAGAGTTAAA----GAAT**AAGAGAG**AG  
 Arja TTTTCACC-----TTAGTCTGACCCCTATTGAT-GCATTAAAGAAA**CTAAGAG**AG  
 Pase ----TTTTTGAA----TACCCC-----ATAAATTAACATAA--AAAGAAA**CTAAAGG**AG  
 Trel CCGTCCCTTTTTCGATT--G-----TGTCGACCCA---TGACCAAGAGAAC**CTGACAG**AG  
 Lifa ---TTAAC---TCCCACCCTCTTATTAAGGGCTGAAGACG-ACAGAGAATA**CCATTAG**AG  
 Acur TGTTTCTATAATCAACACTAC-----GATAACATAGATTTTT-TAAGAAA**ACAGGAG**AG  
 Ampe -TTCCTGACCCC-TGTCCTAACCCCTA-----GAGACACCCAAAGAAA**CCGAGAG**AG  
 Urja CATTGACTCAATCCC---TAC--AACCAT--GACA-----AGAAA**TTAAGAG**AG  
 Enet CGATACCC-----CCTTGGTATATCCTTACAACGTCTAAGGAGAAG**TAAAGG**AG  
 Ptbr -TAAACACCTAATAATTTTC-----ATCCG-----TTAAGAGAAG**TCTAAG**AG  
 Safa CA-----ATCACGCG-----CATCGTCGATA---AAAGAGCC**GTTAAGG**AG  
 Icae -CTCTTCA----CCACGGTCTTACCCATACCGA-----CACCTAAAGAAG**CTTAGAG**AG  
 Asmi -TTAAAACCCCTAAGGCCCTGTCTTTAAAGTAGTA-----AAGAAA**CTTAAGG**AG  
 Foal T-CCC-TTTTA-CCCCTTTTACACTAATT--ACAACAGGCATAGAAGAAG**TAA TAG**AG  
 Drze -TAATTTATAAACATAA--TAAACACCATAATA--T--TA---AGATA**TTATTAG**AG  
 Rhas TA---GCCAAACAAGGCGACGCCCTA---CCCAGACCACGAGAA-TTAA**TCAAAG**AG  
 Elac CAACC---CGACCTGATTACATCTCCCC---CGGTCCA-----AAGAAAG**CTAAAG**AG  
 Kugu TTCTCCCCGATGGTT--ACTCCCACCC---TGACAAA-----AAGTAA**CCAAGAG**AG  
 Plor -TT--CATCTCCTGGCCCCTACGCCCCCTCT-----ACACCAAAGAACCA**CCGAGAG**AG  
 Sgun TCACCCCTGTCTTACTCCGTTT-----TGACACCC---TAAGAAA**CCGCGAG**AG  
 Zaco TCTTCCCC-----TCACGTCTAGACCCA---CTTC-GACACTTTAAGAAA**CCGACAG**AG  
 Zbfl ACTCCTCC-----TATTCTAATCCCTTAGAAAC--CTAAA---GAAA**CCAAGAG**AG  
 Spba TCACACTTGCACCAATGCTTTA-----ATAG-----ATAACTAGAGAAA**CCGT TAG**AG  
 Game CTCTTC---CTCCCGGTCTT-----ACCCCTACCGATCCAC-AGAGAAA**CTTAGAG**AG  
 Thth ATTACCCGCGGTCTTACCCC---TACCGATG-CAC-----TAAAGAAG**CCTAGAG**AG  
 Xigl CATTACCTCCGTTTCAACT-----TCCTCCGATAATCCGAGAAA**CTGCGAG**AG  
 Hyja CCCTTCAACCCCGGTA-----CTTCTCCACTACCGATATCTAAAAGAAG**CCTAGAG**AG  
 Psan CCTTCCACCCCGGTACCCACCCACTACCGATACCT-----AAAGAAG**CCTACAG**AG  
 Cupa C-----TTCACCAAGGTCTC--ACCCCTACCGACACCT----A--AAGAAG**CCGAGAG**AG  
 Mpch CTTTCAACTTTATTT--ATT-TAAACTGAT--TCA-----AAAGAA**CCAAAGA**AG  
 Char TCATTCA--CACAACT-----CCTAATGCCCCCGTTACCCG--AGAAG**ACAGGGG**AG  
 Pser -CATTAC-----CCCACCCCAA-----CAGATAC-TAAAGAACA**CCGCGAG**AG  
 Prol -CCACTCATGCACTG---TTATTACCCATCAGATG--CA---ACGAGAAA**CTAGAGG**TG  
 Plbi CA-----CTCATG--CACTTTGTTTAACCCCTTCAGAC--GCAGCGAGAAA**CCAGGGG**TG  
 Calu ACCTCATGGGC-----CACAGTGTCTTATGATAAAAAGAAG**GGG GAG**AG  
 Papa AAGCCACC-TCGTGCCTA-TTATTATAGGAAA-----AAGAAA**CTAAGAG**AG  
 Suf r TTTT---CAAATTCGTACCACTTAACCCGACCAA-----GAGAGCC**CTAAGGG**AG  
 Stci CTCAAATCAAAGCCA-TCAAGCCCATTAA-----AAGAAT**ATTAGG**AG  
 Taru AACTCCATAACTATT-----TATATTAACCCG-----ACTTTAAGAAA**CCAAAG**AG  
 Rala TCTTACCCCTTGTTT-----T----CATCCCACCCGATGCCCGAGAAA**CCAAGAA**AG

\*

|      | 18   | 18'       | 19      | 19'       | 20      |        |    |        |     |       |      |     |    |
|------|------|-----------|---------|-----------|---------|--------|----|--------|-----|-------|------|-----|----|
| Scca | TTAT | TTAGAAGAG | GAACA-G | CCCTTCTAA | ATT-AG  | ATACAA | CT | TTTT   | --- | AGG   | TGC  | TT  |    |
| Muma | TTAT | TTAGAAGAG | GTACA-G | CCCTTCTAA | ACT-AG  | ATACAT | CT | TTTA   | --- | AGAT  | TCC  | GA  |    |
| Erca | TTAT | TCATAAGAG | GTACA-G | CTCTTATGA | ACA-G   | AAACAA | CC | CCCA   | --- | AGGA  | AGC  | AA  |    |
| Pose | TTAT | TCACAGGAG | GTACA-G | CTCCTGTGA | ACT-G   | AAACAA | CC | CAAT   | --- | AGG   | AGC  | AA  |    |
| Actr | TTAT | TCAAGAGAG | GTACA-G | CTCCCTTGA | AAA-AG  | ACACAA | CC | TTAA   | --- | CAGG  | CGC  | AT  |    |
| Scal | TTAT | TCAAGAGAG | GTACA-G | CTCCCTTGA | AAA-AG  | ACACAA | CC | TTAA   | --- | CAGG  | TGC  | AT  |    |
| Posp | TTAT | TCAAGAGAG | GTACA-G | CTCCCTTGA | AAA-AG  | ACACAA | CC | TTAA   | --- | CAGG  | CGC  | AT  |    |
| Atsp | TTAC | TCAAAGGAG | GTACA-G | CTCCTTTGA | GAA-AG  | ATACAA | CC | TTAA   | --- | CGGA  | TGC  | AT  |    |
| Leoc | TTAC | TCAAAGGAG | GTACA-G | CTCCTCTGA | GAA-AG  | ACACAA | CC | TTAA   | --- | TAGAT | TGC  | AT  |    |
| Amca | TTAT | TCAAAGGAG | GTACA-G | CTCCCTTGA | AAA-AG  | ACACAA | CC | TTAA   | --- | ATG   | TGC  | AT  |    |
| Osbi | TTAG | TCAATGGAG | GTACA-G | CTCCCTTGA | AAA-AG  | ACACAA | CC | TTTA   | --- | CAGA  | AGC  | GT  |    |
| Pabu | TTAA | TTGAAGGAG | GTACA-G | CTCCTTCAA | AAA-AG  | AAACAA | CC | TTCA   | --- | CAGAT | TGC  | GC  |    |
| Hial | TTAG | TCAAAGGAG | GTACA-G | CTCCTTTGA | CAA-AG  | ATACAA | CC | TTAA   | --- | AGAT  | TGC  | AT  |    |
| Elha | TTAG | TCAGAGGAG | GTACA-G | CTCCCCTGA | AAA-AG  | ACACAA | CC | TTCA   | --- | CAGG  | AGC  | AT  |    |
| Mlcy | TTAG | TCAGAGGGG | GTACA-G | CCCCTCTGA | AAA-AG  | ACACAA | CC | TTACA  | --  | CAGG  | AGC  | AT  |    |
| Algl | TTAG | TCAAAGGAG | GTACA-G | CTCTTTTGA | AAA-AG  | ATACAA | TC | TTCT   | --- | CAGG  | TGC  | AT  |    |
| Ptgi | TTAG | TCAGAGGAG | GTACA-G | CTCCCCTGA | AAA-AG  | ACACAA | CC | TTAA   | --- | CAGG  | AGC  | AT  |    |
| Alaf | TTAG | TCAAAGGAG | GTACA-G | CTCCTTTGA | AAA-AG  | ACACAA | CC | TTTC   | --- | CAGG  | AGC  | AT  |    |
| Nock | TTAG | TCAAAGGAG | GTACA-G | CTCCTTTGA | AAA-AG  | ACACAA | CC | TTAA   | --- | CAGG  | AGC  | AT  |    |
| Anja | TTAG | TCAAAGGGG | GTACA-G | CCCCTTTGA | AAC-AG  | ACACAA | CC | TTATT  | --  | CAGG  | AGC  | AC  |    |
| Gyki | TTAG | CCAAAAGGG | GTACA-G | CCCTTTTGC | AAA-AG  | ACACAA | CC | TTATTT | -   | AGG   | AGC  | GA  |    |
| Syka | TTAG | TCAAAGGGG | GTACA-G | CCCCTTTGA | AAC-AG  | ACACAA | CC | TTTT   | --  | AC    | AGG  | AGC | G- |
| Opma | TTAG | TCAAAGGGG | GTACA-G | CTCCTTTGA | AAC-AG  | ACACAA | CC | TTAT   | --- | CAGG  | CGC  | AC  |    |
| Comy | TTAG | TCGAAGGGG | GTACA-G | CTCCTTCGA | AAA-AG  | ACACAA | CC | TTAC   | --  | CC    | AGG  | TAA | A- |
| Sasp | TCAG | TCAGTGGGG | GTACA-G | CCCCCCCCG | ACTA-AG | ACACAA | CC | TTACA  | --  | T     | TGAT | TGC | CC |
| Eupe | TTAG | TCAAAGGGG | GTACA-G | CCCCCTTGA | AAA-AG  | ATACAA | CC | TTTA   | --- | TAGG  | AGC  | AC  |    |
| Enja | TTAA | TCAGAGGAG | GTACA-G | CTCCCCTGA | TAC-AG  | ATACAA | CC | TTTT   | --- | TAGG  | AGA  | CA  |    |
| Same | TTAG | TCAAAGGAG | GTACA-G | CTCCCTTAA | CAA-AG  | ACACAA | CC | TTAGA  | --  | CAGG  | AGC  | CT  |    |
| Chch | TTAT | TCAGAAGGG | GTACA-G | CTCTTCTGA | ACC-AG  | ACACAA | CC | TTAC   | --  | AC    | AGG  | AGC | T- |
| Grgr | TTAG | TCAGAGGAG | GTACA-G | CTCTTCTGA | AGC-AG  | ACACAA | CC | T-TT   | --  | AT    | AGG  | AGC | CT |
| Caau | TTAG | TTAAAGGGG | GTACA-G | CCCCTTTGA | CAA-AG  | ATACAA | CC | TTTC   | --- | TAGG  | AGC  | AT  |    |
| Cyca | TTAG | TTAAAGGGG | GTACA-G | CCCCTTTAA | CAA-AG  | ACACAA | CC | TTTC   | --- | CAGG  | AGC  | AT  |    |
| Dare | TTAG | TTAAAGAGG | GTACA-G | CCCCTTTAA | CAA-AG  | ATACAA | CC | TTTT   | --- | CAGG  | AGA  | AT  |    |
| Cost | TTAG | TTAAAGGGG | GTACA-G | CCCCTTTAA | TTA-AG  | ATACAA | CT | TTAT   | --- | CAGG  | CGC  | AT  |    |
| Leec | TTAG | TTGAAGGGG | GTACA-G | CCCCTTTAA | CCA-AG  | ACACAA | CC | TTAAA  | --  | CAGG  | AGC  | AT  |    |
| CrIa | TTAG | TCAAAGGGG | GTACA-G | CCCCTCTGA | TAA-AG  | ATACAA | CC | TTAG   | --  | CC    | AGG  | AGC | AT |
| Clmc | TTAG | TCAAAGAGG | GTACA-G | CCCCTTTGA | TCA-AG  | ACACAA | CC | TTACT  | -   | AC    | AGG  | AGC | TT |
| Phin | TTAA | TCAAAGAGG | GTACA-A | CTCTTTTGA | CC--AG  | ACACAA | CC | TTACA  | --  | CAGG  | AGA  | TT  |    |
| Icpu | TTAG | TCAAAGGGG | GTACA-G | CCCCTTTGA | AAC-AG  | ACACAA | CC | T-CA   | --  | CC    | AGG  | AGC | TT |
| Psto | TTAG | TCAAAGGGG | GTACA-G | CCCCTTTGA | AAC-AG  | ACACAG | CC | TCA    | --- | CC    | AGG  | AGC | TT |
| Cora | TTAG | TCAAAGGGG | GTACA-G | CCCCTTTGA | AAA-AG  | AAACAA | CC | TACA   | --- | CAGG  | AGC  | TT  |    |
| Eisp | TTAA | TCAAAGGGG | GTACA-G | CCCCTATGA | AAC-AG  | ACACAA | CC | TTAA   | --- | CAGG  | AGC  | TT  |    |
| Apal | TTAG | TCAAAGGGG | GTACA-G | CCCCTATGA | CAC-AG  | ACACAA | CC | TTCT   | --- | CAGG  | TGC  | TT  |    |
| EsLu | TTAA | TCAAAGAGG | GTACA-G | CTCTTTTGA | ACA-AG  | ACACAA | CC | TTA    | --- | AC    | AGG  | TGT | TT |
| Dape | TTAG | TCAAAGGAG | GTACA-G | CTCCTTTGA | ATA-AG  | ACACAA | CC | TTGA   | --- | CAGG  | TGC  | TT  |    |
| Glse | TTAG | TCAAAGAGG | GTACA-G | CTCTTTTGA | ACA-AG  | ACACAA | CC | TTAC   | --- | TAGG  | TGC  | TT  |    |
| Naar | TTAG | TCAAAGAGG | GTACA-G | CTCTTTTGA | ACA-AG  | ACACAA | CC | TTAT   | --- | CAGG  | CGC  | TT  |    |
| Baoc | TTAG | TCAAAGAGG | GTACA-G | CTCTTTTGA | ACA-AG  | ACACAA | CC | TTAC   | --- | CAGG  | CGC  | TT  |    |
| Opso | TTAG | TCAAAGAGG | GTACA-G | CTCTTTTGA | ACA-AG  | ACACAA | CC | TTAC   | --- | CAGG  | CGC  | TT  |    |
| Alte | TTAG | TCAGAGGAG | GTACA-G | CTCCTCTGA | ACC-AG  | ACACAA | CC | TTAC   | --- | CAGG  | AGC  | CC  |    |
| Plap | TTAG | TCAGAGGAG | GTACA-G | CTCCCCTGA | ACC-AG  | ACACAA | CC | TTAT   | --- | CAGG  | AGC  | CC  |    |

Plal TTAT TCGAAGGAG GTACA-GCTCCTTTCGA ACA-AGC ACACAA CC TT-TG--CAGGCGC TC  
 Sami TTAT TCAAGGGAG GTACA-GCTCCTTTCGA ACC-AGC ACACAA CCTTAA---CAGGCGC TC  
 Rere TTAG TCGAAAGAG GTACA-GCTCCTTTCGA ACC-AGC ACACAA CCTTAC---CAGGCGC TT  
 Gama TAAG TCAAAAGAG GTACA-GCTCTTTTGA TAG-AGC ACACAA CCTTAC---CAGGTGC TT  
 Onmy TTAG TCAAAGGAG GTACA-GCTCCTTTCGA ACA-AGC ACACAA CCTTAA---CAGGCGC CT  
 Sasa TTAA TCAAAGGAG GTACA-GCTCCTTTCGA ACA-AGC ACACAA CCTTAA---CAGGCGC CT  
 Cola TTAG TCAAAGGAG GTACA-GCTCCTTTCGA ACA-AGC ACACAA CCTTAA---CAGGCGC CT  
 Dita TTAG TCAAGAGAG GTACA-GCTCTCTTGA AAT-AGC ACACAA CCTTTT---CAGGCGC TT  
 Gogr TAAG TCAAGGGAG GTACA-GCTCCTTTCGA ACC-GGC ATACAA CC C-CC--TCAGGCGC TA  
 Chsl TTAC TCAAGTGAG GAACA-GCTCCCTTGA CCA-AGC ACACAA CCTTCA---CAGGAGC TT  
 Atja TAAA TCAAAGGAG GTACA-GCTCCTTTCGA GTA-AGC ATACAA CT TTAA---AGAAGC TT  
 lido TAAA TCAAAGGAG GTACA-GCTCCTTTCGA ATA-AGC ATACAA CT TTAA---AGAAGC TT  
 Auja TTAG TTAAGAAG GTTCA-GCTTCTTTTAA AA--AGC ATACAA CT TTTT---TAGGAGC TT  
 Chag TTAG TCAAAGAAG GTCCA-GCTTCTTTTGA ACA-AGC ATACAA CT TTTT---TAGGAGC CT  
 Hami TTAG TTAAGAAG GTCCA-GCTTCTTTTAA AAC-AGC ACACAA CT TTTT---TAGGAGC CT  
 Saun TTAG TTAAGAAG GTCCA-GCTTCTTTTAA ACA-AGC ACACAA CT TT-TT--CAGGAGC CA  
 Nema TTAG TCGAAGAGG GTACA-GCCCTTTCGA AAA-AGC ACACAA CCTC-CC--AGGAGC TA  
 Disp TTAG TCAAAGAGG GTACA-GCCCTTTCGA AAC-AGC ACACAA CCTCC---CCGGGAGC CT  
 Myaf TTAG TCAAAGAGG GAACA-GCCCTTTCGA AAA-AGC ACACAA CCTCCA---CGGAGC TA  
 Lagu TTAG TCAAGAAAG GTTCA-GCTTTCTTGA AA--AGC ACACAA CCTTC---CTGGGAGC GT  
 Trtr TAAT TCAAGGGAG GTTCA-GCTCCCTTGA AAG-AGC ATACAA CCTTACG--CAGGTGC AT  
 Zucr TTAT TCAAGGGAG GTTCA-GCTCTCTTGA AGG-AGC ATACAA CCTTATTAAC GGGAGC AT  
 Pxja TTAG CCAACGGAG GTACA-GCTCCTTTTGA AA--AGC ATACAA CT TTAT---TAGGAGC TG  
 Pxlo TTAG CCAACGGAG GTACA-GCTCCTTTTGA AA--AGC ATACAA CT TTAT---CAGGAGC TG  
 Pctr TTAG TCAAAAGAG GTACA-GCTCTTTTGA AA--AGC ATACAA CT TAAT---CAGGAGC CC  
 Apsa TTAG TCAGAAGAG GTACA-GCTCTTCTGAA AA--AGC ATACAA CT TATT---CAGGAGC TT  
 Cabe TTAT TCAGAGGGG GTACA-GCTCCTCTGATAACAAG ATACAA CT TTAA---AGGTGAGT  
 Bzze TTAG TCAAAGGAG GTACA-GCTCCTTTTGA AA--AGC ATACAA CT TTGC---GAGGAGC GT  
 Siim TTAA TCAAAGGAG GTACA-GCTCCTTTTGA AA--AGC ACACAA CT TTAC---TAGGAGC GT  
 Ctru TTAT TCGAAGGGG GTACA-GCCCTTTCGA CCC-AGC ACACAA CT TTTA---TAGGAGC CT  
 Dpbr TAAT TCGAAGGGG GTACA-GCCCTTTCGA CCC-AGC ATACAA CT TTTT---TGGGCGC CT  
 Caki TTAG ACAGAAGGG GTACA-GCTCTTCTGATAA-AGC AAACAA CCTTAG---CAGGTGAC  
 Phja TTAT TCAAAAGGG GCACA-GCTCTTTTGA TAA-AGC AAACAA CT TTTA---CAGGTGCC  
 Brsp TTAG TCAAAAGAG GTTCA-GCTCGTTTGA CTT-TGC AAACAG CCTC-TT--TAAGTATT  
 Gamo TTAA TCAAAAGGG GTACA-GCCCTTTTGA TAG-AGC AAACAA CT TTAA---CAGGTGACC  
 Lolo TTAA TCAAAAGGG GTACA-GCCCTTTTGA TAA-AGC AAACAA CT TTAA---CAGGTGCC  
 Batr GTCG TCAAAGGGG GTACA-GCCCATTTGA CAT-AGC AAACAA CT TC-TC--ATAAGC TT  
 Prmy TTAA TTAAGGGG GGACA-GCTCCTTTTAA TAC-CAGC AAACAA CT GCCT---ATGCGCAT  
 Loli CAAG TGGAAAGGG GAACA-GCCCTTTCTA CCA-AGC ACACAA CT TT-TA--TAGGAGCAT  
 Loam TTAA TCAAGGGG GTACA-GCCCTTTCGA AAA-AGC ATACAA CT TTAG---CAGAGCAT  
 Chab TTAA TCAAAGGGG GTACA-GCCCTTTCGA TAC-AGC ATACAA CT TTTT---TAAGAGCAT  
 Chto TTAA TCAAAGGGG GTACA-GCCCTTTCGA TAC-AGC ATACAA CT TTTT---TAAGAGCAT  
 Majo TTAG TCAAAGGGG GTACA-GCCCTTTCGA CAC-AGC ACACAA CCTTCC---CAGGAGC GT  
 Hlst TTAT TCAAAGGAG GTACA-GCCCTTTCGA TAA-AGC ACACAA CCTTTA--CAGGTGC AT  
 Clpe TTAG TCAAAGGGG GTACA-GCCCTTTCGA CAC-AGC ACACAA CT TTTT---CAAGTGC AT  
 Mlmr TTAA TCAAAGGGG GTACA-GCCCTTTCGA TAG-AGC ATACAA CT TTTT---CAAGAGCAT  
 Cr cr TTAA TCAAAGGGG GTACA-GCCCTTTCGA AAC-AGC GTACAA CT TTTT---TAGGAGC GT  
 Muce TTAA TCAAAGGGG GTACA-GCCCTTTCGA AAC-AGC GTACAA CT TTTT---TAGGAGC GT  
 Bege TTAT TCAAAGGGG GTACA-GCCCTTTCGA AAC-AGC ACACAA CT TTTA---CAGGCGCAT  
 Mela TTAG TCAAAGGGG GTCCA-GCCCTTTCGA ATA-AGC AAACAA CT TTTT---TGGTGC AT  
 Hats TTAG TCAAAGGGG GTACA-GCCCTTTCGA AAC-AGC ACACAA CT TTACC--CAGGAGC CT  
 Or la TTAA TCAAAGAGG GTACA-GCCTATTTGA TGG-AGC ATACAA CT TTAC---TAGGAGC CT

Cosa TTAA TTAAGGGGTACA-GCCCCTTTAA AAA-AAC ACACAACTTTAA---CAGAAAGT  
Exsp TTAT TCAAAGAAGGGACA-GCTTCTTTGA AAA-AAC ACACAACTTTTT---TAGGAGGT  
Depa TTAG TCAAAGAGGTACA-GCTCTTTTGA AA--AAC ATACAACTTT-TA--TAGGAGAA  
Rima TTAG TCAAAGGAGGAACA-GCCCCTTTGA AAC-AAC AAACAACTT-TT--CCAGAAAGT  
Fuol TTAG TCAAAGGGGGACA-GCCCTTTTGA ACC-AAC ATACAACTTTT---TTAGCTGGAT  
Gmaf TTAT TCAAAGGGGTACA-GCCCCTTTGT ACA-AAC ACACAACTTTA---ATGAGAGGT  
Xeei TTAG TCAAAGGGGTACA-GCCCCTTTGA ATC-AAC ATACAACTTTCC---TGGTGGAT  
Pros TTAG TCAAAGGAGGTACA-GCTCCTTTGA AAC-AAC ACACAACTTTAC---CAGGAGGT  
Scmi TTAG TCAAAGGAGGTACA-GCTCCTTTGA AAC-AAC ACACAACTTTAT---CAGGAGGT  
Rolo TTAT TCAAAGAAGGTACA-GCTCCTTTGA AAT-AAC ATACAACTTTA---ACAGGAGCT  
Cere TTAA TCAAAGGAGGTACA-GCTCCTTTGA AAT-AAC ACACAACTTTAA---CAGGAGCT  
Daga TTAG TCAAAGGAGGTACA-GCTCCTTTGA GA--AAC ATACAACTTTTC---CAGGTGGT  
Anco TTAG TCAAAGAGGTACA-GCTCTTTTGA AAC-AAC ACACAACTTTAC---CAGGCGAT  
Dmve TTAG TTAAGGAGGTACA-GCTCCTTTAA AAA--AAC ACACAACTTT-CC--CAGGTGGAT  
Dmar TTAG TTAAGGAGGTACA-GCTCCTTTAAA --AAC ATACAACTTTTC---CAGGCGAT  
Anka TTAG TCAAAGAGGTACA-GCTCTTTTGA AAC-AAC ATACAACTTTGT---CAGGAGGT  
Moja TTAG TCAAAGAGGTACA-GCTCTTTTGA AAC-AAC ATACAACTTTAA--TTAGGCGAT  
Hoja TTAG TCAAAGAGGTACA-GCTCTTTTGA AAC-AAC ATACAACTTTAC---CAGGAGGT  
Bede TTAT TCGAAGGAGGTACA-GCTCCTTTGA AAC-AAC ACACAACTTTAC---CAGGAGGT  
Besp TTAT TCGAAGGAGGTACA-GCTCCTTTGA AAC-AAC ACACAACTTTAC---CAGGAGGT  
Mysp TTAT TCAAAGAAGGTACA-GCTCCTTTGA AAA-AAC AAACAACTTAAC---CAGGAGGT  
Osja TTAT TCAAAGAAGGTACA-GCTCCTTTGA AAA-AAC AAACAACTTTTC---CAGTGGT  
Sgro TTAT TCAAAGAAGGTACA-GCTCCTTTGA AAA-AAC AAACAACTTTGA---TAGTGGT  
Pzpa TTAA TTAAGGAGGTACA-GCTCCTTTAT TA--TAG AAACACTTT-TA--CAGTGGCT  
Zeja TTAA TTAAGGGGTACA-GCTCCTTTT AAT-AGA A-ACACTTTCA---CAGATGCC  
Zzne TTAG TTAAGGAGGTACA-GCTCCTTTT AAT-AGA A-ACACTTTTA---CAGATGGTC  
Zefa TTAA TTAAGGAGGTACA-GCTCCTTTT AAT-AGA A-ACACTTTTA---CAGATGCC  
Acni TTAG TTAAGGAGGTACA-GCTCCTTTT AAT-AGA A-ACACTTTTA---CAGATGCC  
Ncrh TTAG TTAAGGAGGTACA-GCTCCTTTT AAT-AGA A-ACACTTTT---ACAGATGCC  
Agca TTAG TCAAAGGGGGACA-GCCCCTTTGA CAC-AAC ACACAACTTTAA---CAAGAGGT  
Hydy TTAG TCAAAGGGGTACA-GCCCCTTTGA ACC-AAC GTACAACTTTGT---CAGGAGGT  
Gzac TTAG TCAAAGGGGTACA-GCCCCTTTGA ACA-AAC ACACAACTTTAT---CAGGAGGT  
Pevo TTAA TCAAAGGGGTACA-GCCCTTTTGA TAA-AGA ATACAACTTTA---AGCAGAGGT  
Hiku TTAG TCAAAGGGGTACA-GCTCTTTTGA CAT-AGG ACACAACTTTA---TAGTAGTT  
Inpa TTAC CCAAAGGGGGACA-GCCCCTTTGA CCC-AAC AGACAACTTTCA---CGGAGGT  
Auch TTAG TCACAGGAGGTACA-GCTCCTCTGA TAT-AGG ACACAGCTTTACA---CAGGAGGT  
Fico TTAG TCAAAGGGGTACA-GCCCCTTTGA CAA-AGG ATACAACTTTCC---CAGGAGGT  
MacS TTAA TCAAAGGAGGTACA-GCTCCTTTGA TAA-AA ACACAACTTTTT---CAGTGGT  
Moal TAAG TTAAGGGGGACA-GCTCCTTTAA CAT-AAC ATACAACTTTAT---CAGAAAGT  
Syma TTAC TTAAGGGGGACA-GCTCCTTTAA GAC-AAC ATACAACTTTTAC---CAGAAAGT  
Mafr TTAG TCAAAGGGGGACA-GCCCCTTTGA AC--AGA ACACAACTTTAT---CAGAAAGT  
Dcpe TTAC TCAGAGGGGTACA-GCTCCTCTGA CAA-AAC ACACAACTTTC---CCGGAGGT  
Dcti TTAT TCAGAGGGGTACA-GCTCCTCTGA CAA-AAC ACACAACTTTC---CCGGAGGT  
Hehi TTAT TCAAAGGGGTACA-GCCCCTTTGA AAC-AAC ATACAACTTTCC---CGGAGGAA  
Stam TTAG TCGAAGGGGTACA-GCCCCTTTGA ACC-AAC ACACAACTTT-TA--TAGGAGTT  
Hogi TTAG TCAAAGGGGTACA-GCCCCTTTGA ATT-AAC ACACAACTTTTT---AAGGAGGT  
Erzo TTAG TCAAAGGGGTACA-GCCCCTTTGA ACC-AAC ACACAACTTTCC---CAGGAGGT  
Hxot TTAG TCAAAGGGGTACA-GCCCCTTTGA ATC-AAC ACACAACTTTAC---CAGGAGGT  
Core TTAG TCAAAGGGGTACA-GCCCCTTTGA ATC-AAC ACACAACTT-TA--CTAGGAGGT  
Apve TTAG TCAAAGGGGTACA-GCCCCTTTGA ATC-AAC ACACAACTTTAC---CAGGAGGT  
Latj TTAC TCAAAGGAGGTACA-GCTCCTTTGA ACC-AAC ATACAACTTTCT---AAGGAGGT  
Laja TTAG TCAAAGAGGTACA-GCTCTTTTGA AAC-AAC AAACAACTTTC---CCAGGAGGT

Syja TTAT TCAAAGGGGGAACA-GCCCCTTTGA AAC-AAG AAACAACT TTCC --- CAGGAGG GT  
 Epme TTAG TCAAAGGGG GTACA-GCCCCTTTGA AAC-AAG ATACAACT TTTT --- TAGGAGG AT  
 Grse TTAG TCAAAGGGG GTACA-GCCCCTTTGA AAC--AG ACACAACT TT-AT--CAGAGG AT  
 Clja TTAA TCAAAGGGG GTACA-GCTCCTTTGA TAA-AA ATACAACT TCTC --- CAGGTGG GT  
 Ogcy TTAT TCGAAAGGG GTACA-GCCCTTTGGA AAT-AAG AAACAACT T-TA--ACAGAGG TA  
 Plna TTAG TCAAAAGGAG GTTCA-GCTCCTTTGA AAC-AAG ACACAACT TTTT --- CAGGAGG GA  
 Lema TTAG CCAAAGGGG GTACA-GCCCCTTTGA AAC-AAG ATACAACT TTTT --- CAGGAGG GT  
 Etzo TTAG TCAAAGGGG GTACA-GCCCCTTTGA ATC-AAG ATACAACT T-TT--CCAGGAGG GT  
 Apse TTAG TCAAAGGGG GTACA-GCCCCTTTGA AA--AAG ATACAACT TTA---CCAGAGG GT  
 Epde TTAG TCAAAGGGG GTGCA-GCCCCTTTGA AAC-AAG ACGCAA CT TT-CC--CAGGAGG GT  
 Slja TTAA TCAGAGGAG GCACA-GCTCCTCTGA TAA-AAG ATACAACT TTAG --- CAGGAGG GT  
 Bsja TTAA TCAAAGGAG GGACA-GCCCCTTTGA TAC-AAG ACACAACT TTTA --- CAGAGGACT  
 Ecna TTAG TCAAAAGGG GTACA-GCCCTTTTGA ACC-AAG ATACAACT TTAT --- AAGGAGG GA  
 Cohi TTAG TCAAAGGAG GAACA-GCTCCTTTGA AAC-AAG ATACAACT TTTT --- TAATGG GT  
 Caar TTAG TCAAAGGGG GTACA-GCCCCTTTGA ATA-AAG ACACAACT TTTT --- TAGGAGG AT  
 Came TTAG TCAAAGGGG GTACA-GCCCCTTTGA ATA-AAG ATACAACT TT-TT--TAGAGG AT  
 Mema TTAG CCAAAGGAG GTACA-GCCCCTTTGA ACC-AAG AAACAACT TTAC --- CAGGAGG GT  
 Lenu TTAG TCAAAGGGG GTTCA-GCCCCTTTGA CAA-AGG ACACAACT TTAC --- CAGTAGG AA  
 Brja TTAA TCAAAGGGG GTACA-GCCCCTTTGA TAT-AAG ACACAACT TTTA --- CAGGAGG GT  
 Plma TTAA TCAAAGGGG GTACA-GCCCCTTTGA AAC-AAG ACACAACT TT-CC--CAGGAGG GT  
 Emst TTAA TCAAAGGGG GTACA-GCCCCTTTGA TAC-AAG ACACAACT TTCC --- CAGGAGG GT  
 Ptti TTAG TCAAAGGGG GTACA-GCCCCTTTGA TAC-AAG ACACAACT TTTT --- CAGGAGG GT  
 Losu TTAG TCAAAGGAG GTACA-GCTCCTTTGA CCT-AAG ACACAACT TTTT --- AGCTGG GT  
 Geoy TTAT TCAAAGGGG GTACA-GCCCCTTTGA AAC-AAG ATACAACT TTTT --- GAAAAGG CT  
 Dipi TTAA TTAAGGGG GGACA-GCCCCTTTAA TCA-AAG ACACAACT TT-TA--CAGGAGG AT  
 Pama TTAA TCTTAGGGG GTACA-GCCCCTAAGA TCA-AGG ACACAACT TTCA --- CAGGTGG GT  
 Leob TTAG TCAAAGGGG GCACA-GCCCCTTTGA CAT-AAG ACACAACT TTTT --- TAGTAGG CT  
 Neba TTAA TCAAAAGGG GGACA-GCCCTTTTGA TAA-AAG AAACAACT TTAC --- TAGGAGG AT  
 Pdpi TTAG TCAAAGGGG GTACA-GCTCCTTTGA CCA-GAG ACACAACT CTTT --- CAGGAGG GT  
 Nimi TTAG TTAAGGGG GTACA-GCCCCTTTAA CAC-AAG ACACAACT TTCC --- CAGGAGG GT  
 Uptr TTAG TCAAAGGGG GTACA-GCCCCTTTGA TAC-AGG ACACAACT TTCC --- CCAGGAGG GT  
 Pesc TTAA TCAAAGGGG GTACA-GCCCCTTTGA CCC-AAG ACACAACT TTTT --- CAGGAGG GT  
 Baar TCAT TCAAAGGAG GTACA-GCTCCTTTGA AAC-AAG ACACAACT TTTT --- CAGGAGG GT  
 Moar TTAA TCAAAGGGG GTACA-GCCCCTTTGA TAC-AAG ACACAACT TTTT --- CAGGAGG AT  
 Toja TTAG TCAAAGGGG GTACA-GCCCCTTTGA ATC-AAG ATACAACT TTTT --- CAGGAGG GT  
 Chau TTAA TCAAAGGGG GTACA-GCCCCTTTGA TAT-AAG ACACAACT TTTA --- TAGGAGG AT  
 Chse TTAG TTAAGGAG GAACA-GCTCCTTTAA TAC-AAG ACACAGCT TTTT --- CAGGAGG GT  
 Enar TTAG TCAAAGGGG GTACA-GCCCCTTTGA ATC-AAG ACACAACT TTTT --- CAGGAGG AT  
 Hpty TTAG TCAAAGGGG GTACA-GCCCCTTTGA AAC--AG ATACAACT TTTT --- CAGGAGG GT  
 Nana TTAG TCAAGGGG GCACA-GCCCCCTTGA AAA-AGG ACACAACT TTAC --- CAGATGG GT  
 Mcst TTAG CCAAAGGGG GAACA-GCTCCTTTGGA AAT-AAG ATACAACT TTAC --- CAGGAGG GT  
 Rhox TTAG TCAAAGGGG GCACA-GCCCCTTTGA AAC-AAG ACACAACT TTAC --- CAGAGG GT  
 Opfa TTAG TCAAAGGGG GAACA-GCCCCTTTGA AAC-AAG ACACAACT TTAC --- CAGGAGG GT  
 Paar TTAG TCAAAGGAG GTACA-GCTCCTTTGA AAA-AGG ACACAACT TTAT --- CAGGAGG AT  
 Gozo TTAG TCAAAGGGG GTACA-GCCCCTTTGA AAT-AAG ATACAACT TTAC --- CAGGTGG GT  
 Ackr TTAA TCGAAGGGG GTACA-GCTCCTTTGA TAT-AAG ACACAACT TTAA --ACAGGAGG GT  
 Elev TTAG TCAAAGGAG GTACA-GCTCCTCTGA ATA-AAG AAACAACT TT-TA--TAGATGG AT  
 Trdu TTAG TCAAAGGGG GTACA-GCCCCTTTGA AAC-AAG ATACAACT TTC --- CAAGGAGG GT  
 Amoc TTAG TCAAAAGGG GTACA-GCCCTTTTGA AAT-AAG ATACAACT TTTT --- CAGGAGG AT  
 Hame TTAG TCAAGGGG GTACA-GCCCCTTTGA ACA-AGG ACACAACT TTAA --- CAGGAGG TT  
 Chso TTAC CCAAAGGGG GTACA-GCCCCTTTAG GAC-AAG ACACAACT TCCC --- CAGGAGG AT  
 Lyto TTAG TCAAAGGGG GTACA-GCCCCTTTGA ACC-AAG ATACAACT TTAC --- CAGGAGG GT

Encr TTAG TCAAAGGGG GTACA-G CCCCTTTGA ACC-AAG ACACAA CT TTAT --- CAGGAGG GT  
 Bvar TTAA TCAAAGGGG GCCCA-G CCCCTTTGA AAC-AAG ACACAA CT TTTT --- CAGAAGG AT  
 Noco TTAT TCAAAGGGG GTACA-G CCCCTTTGA AAC-AAG ACACAA CT TTTC --- CAGGAGG GT  
 Chsp TTAG TCAAAGGAG GAACA-G CCCCTTTGA AAC-AG ATACAA CT TATA--AC AGAAGG AC  
 Arja TTAG TCAAAGGGG GTACA-G CCCCTTTGA ATC-AAG ACACAA CT TTAT --- TAGGCGG GT  
 Pase TTAT TCAAAGGAG GCACA-G CTCCTTTGA AAC-AAG ATACAA CT TTAT --- TAGGTGA AT  
 Trel TAAT TCAAAGGGG GTTCA-G CCCCTTTGA GTG-AGG ATACAA CC TTAT --- AAGCAGC CC  
 Lifa TTAG TCGAAGGAG GTACA-G CCCCTTCGA CCA-AAG ATACAA CT TTTT --- AAGACGC CA  
 Acur TCAG TCCTAAGAG GTACA-G CTCTTAGGA CAA-AGA GTACAG CC TT-CC--A AGGAGG AA  
 Ampe TTAT TCAAAGGGG GTACA-G CCCCTTTGA AAT-AAG ATACAA CT TTAT --- CAGGAGG AT  
 Urja TTAA TTAAGGGG GGACA-G CCCCTTTGA AAT-AAG ACACAA CT TTTA --- CAGGTGC CT  
 Enet TTAC TCAAGAGGG GGACA-G CTCTCTTGA GAT-AAG ACACAA CT TTTT --- TGATTCG GT  
 Ptbr TTAG TTTAAGGGG GTCCA-G CCCTTTAAA CAA-AAG AAACAA CT TTAT --- TAGATGC AT  
 Safa TTAG TCATAGGGG GTCCA-G CCCCTATGA CGA-AAG AAACAA CT TTAT --AA GGAAGC CT  
 Icae TTAA TCAAAGGGG GTACA-G CCCCTTTGA GAC-AAG ACACAA CT TTCC --- CAGGAGG GT  
 Asmi TTAG TCAAAGGAG GAACA-G CTCCTTTGA CAA-AAG AATCAA CT TTTC --- TAAGAGC TT  
 Foal TTAT TTTAAGGGG GTTCA-G CCCTTTAAA AAC-AGA ATACAG CC CCCT --- TAGAAGG GT  
 Drze TTAG TCAAAAGAG GAACA-G CCCTTTTGA CTA-AGA AAACAA TC TTAC --- AAGGAGC TT  
 Rhas TTAG TCGAGGGGG GTACA-G CCCCTTCGA AAA-AAG ATACAA CT TTAC --CA TGGAGC AA  
 Elac TTAG TCAAGAGGG GTACA-G CCCTCTTGA AA--GAG ATACAA CT CTAA--CA AGCAGC TA  
 Kugu TTAG TCAAAAGGG GTACA-G CCCCTTTGA AA--AAG ATACAA CT TTAAT --AGGAAGC GT  
 Plor TTAA TCAAAGGGG GTACA-G CCCCTTTGA TAC-AAG AAACAA CT TTAC --- CAGGAGG AT  
 Sgun TTAA TCAAAGGGG GTACA-G CCCCTTTGA TAA-AAG ACACAA CT TTTC --- CAGGAGG GT  
 Zaco TTAA TCAAAGGAG GTACA-G CCCCTTTGA TAC-AAG ACACAA CT TTCC --- TAGGAGC TT  
 ZbfI TTAG TCAAAGGGG GTACA-G CCCCTTTGA CAT-AAG ATACAA CT TTA --- CCAGGAGC TA  
 Spba TTAG TCAAAGGGG GTCCA-G CCCCTTTGA AAC-AAG ACACAA CT TTTA --- TAGGAGG GT  
 Game TTAA TCAAAGGGG GTACA-G CCCCTTTGA GAC-AAG ATACAA CT TTCC --- CAGGAGG GT  
 Thth TTAA TCAAAGGGG GTACATG CCCCTTTGA GAC-AAG ATACAA CT TTTC --- CAGGAGG GT  
 Xigl TTAG TCAAAGGGG GTACA-G CCCCTTTGA ACC-AAG ACACAA CT TT-TC--CAGGAGG GT  
 Hyja TTAA TCAAAGGGG GAACA-G CTCCTTTGA CCC-AAA ACACAA CT TTCC --- CAGGAGG GT  
 Psan TTAG TCAAAGGAG GAACA-G CTCCTTTGA CAT-AAG ACACAA CT TTCC --- CAGGAGG GT  
 Cupa TTAA TCAAAGGGG GTACA-G CCCCTTTGA GAC-AAG ACACAA CT TTC --- CCAGGAGG GT  
 Mpch TTAG TTAAGGAG GTACA-G CTCCTTTAATA-AAG ATACAA CT TTTT --- CAGATGC AT  
 Char TTAG TCAAACGGG GTACA-G CCCATTTGA CCC-AAG ATACAA CT TTTT --- TAGGAGG GT  
 Pser TTAG TCAAAGGGG GTACA-G CCCCTTTGA ACC-AAG ACACAA CT TTAC --- CAGGTGC GT  
 Prol TTAG TCAAAGGGG GTACA-G CCCCTTTGA AAC-AAG ACACAA CT TTTA --- CAGGAGG AT  
 Plbi TTAG TCAAAGGGG GTACA-G CCCCTTTGA AAC-AAG ACACAA CT T-TT--CCAGCAGG AT  
 Calu TTAG TCGAAGGGG GTTCA-G CCCCTTTGA AAA-AAG ACACAA CT TTTT --- AAGGAGG AT  
 Papa TTAA TTAAGGTTG GTACA-G CCCCTTTAAA --CAG ACACAA CT TTTA --- CAGAAGG GT  
 SufR TTAG TTACAGGAG GTACA-G CCCCTGTGA CAC-AAG AAACAA CT TTAC --- CAGGAGG AT  
 Stci TTAG CTAAGGAG GTACA-G CTCCTTTAT TTA-AAG ACACAA CT TTAC --- CCGGAGG AT  
 Taru TTAA TCAAAGGGG GTACA-G CCCCTTTGA TAC-AAG AAACAA CT TTTAA --CAGGAGG AT  
 Rala TTAA TCGAAGGAG GTACA-G CTCCTTCGA CAC-AAG AAACAA CT TTTT --- CAGGAGG AT

\* \* \* \* \*

|      | ;                                        | HVR  | ;   | 21        | 22  | 22' | 21' |
|------|------------------------------------------|------|-----|-----------|-----|-----|-----|
| Scca | AATG-ATCATA-ATTA--TTAAGGTTTT-----TCCTC   | AGTG | GGC | CTAAAAGCA | GCC | AC  | CT  |
| Muma | AATG-ATCATAATTATT-----AAGGTT--TC-CACCCC  | AGTG | GGC | CTAAAAGCA | GCC | AC  | CT  |
| Erca | AAAG-ATCATAATATA----TAAGGA--CAA--TATTTA  | AGTG | GGC | CTGAAAGCA | GCC | AC  | CT  |
| Pose | AA-AGATCATAATAATACA--AGGATAAG---ATCC--A  | AGTG | GGC | CTGAAAGCA | GCC | AC  | CT  |
| Actr | AAA-GATCACATTAAATT--AAAGGAACCTTT---GTTTC | AGTG | GGC | CTAAAAGCA | GCC | AC  | CT  |
| Scal | AAAG-ATCATA-TTAAATCAAAGGAACCTT----TGTTTC | AGTG | GGC | CTAAAAGCA | GCC | AC  | CT  |
| Posp | AA-AGATCATATTCAAACC--AAAGGAAATTTGTTT--C  | AGTG | GGC | CTAAAAGCA | GCC | AC  | CT  |
| Atsp | AAAG-ATCACAACA---CAACAGGACCTTCT---GCTCC  | AGTG | GGC | CTAAAAGCA | GCC | AC  | CT  |
| Leoc | AAAG-ATCATAACATAAC--AGG-ACTTCCC---GCTCC  | AGT  | GGC | CTAAAAGCA | GCC | AC  | CT  |
| Amca | AA-AGATCATAATGATAAA--AGGACCCC--TACTT--C  | AGTG | GGC | CTGAAAGCA | GCC | AT  | CT  |
| Osbi | AAAG-ATCATATTTT-----TTAAGGTACTCT---GTTAC | AGTG | GGC | CTAAAAGCA | GCC | AT  | CT  |
| Pabu | AAGG-ATTATA-TTA-ATT-AAGGCACTCT----ACTAC  | AGTG | GGC | TTGAAAGCA | GCC | AC  | CT  |
| Hial | AAGG-ATCATAATGACCA--A-GGTAATC-T---GCTTC  | AGTG | GGC | TTAAAAGCA | GCC | AT  | CT  |
| Elha | AAGG-ATCATAATC----AAAAGGCACCCT---GCTCC   | AGTG | GGC | CTAAAAGCA | GCC | AC  | CT  |
| Mlcy | AAGG-ATCACAATAAAA-----AAGACACCATCAAGCCAC | AGTG | GGC | CTAAAAGCA | GCC | AC  | CA  |
| Algl | AAG-GATCATATTATTT---TAAGGTAAATT---GCTTT  | AGTG | GGC | CTAAGAGCA | GCC | AT  | CT  |
| Ptgi | AAGG-ATCATATT--AAT--TAAGGTACCC---TGCTTC  | AGTG | GGC | CTAAGAGCA | GCC | AC  | CT  |
| Alaf | AAAG-ATCATAATATT--C--AAGGTAACT---GCTTC   | AGTG | GGC | CTAAAAGCA | GCC | AA  | CT  |
| Nock | AAA-GATCATA-ACAAATCAAGGTAACTGC-----CTC   | AGTG | GGC | CTAAAAGCA | GCC | AA  | CT  |
| Anja | AAGG-ATCATACCATA----AAAGGACAAAATTA-CCTC  | AGTG | GGC | CCAAAAGCA | GCC | AC  | CT  |
| Gyki | AAGG-ATCA----AAACC--CAAGGCATCTT---CCCC   | AGTG | GGC | CTAAAAGCA | GCC | AC  | CT  |
| Syka | CAAGGATCATAATAATTTAA---GGTATATTAGCCGCCTC | AGTG | GGC | CTAAAAGCA | GCC | AC  | CT  |
| Opma | AAGG-ATCAAAGATTA--CTAAGGATTAGAA--TCCCTC  | AGTG | GGC | CCAAAAGCA | GCC | AC  | CT  |
| Comy | TA-AGGATTATACTAAAA---AAGGACATGACTTTCAAC  | AGTG | GGC | CCGAAAGCA | GCC | AC  | CT  |
| Sasp | AAGG-ACCATACCAAAA---A-ATAAACTT--T-TCTC   | AGTG | GGC | CTAAAAGCA | GCC | AC  | CT  |
| Eupe | AAAG-ATCATAA-----ATTAATAAATATA---CACCC   | AGTG | GGC | CCAAAAGCA | GCC | AC  | CT  |
| Enja | AAAG-AATATTGC-CAA-A-CAAGGC-CTTG--GGTCTC  | AGTG | GGC | CTGAAAGCA | GCC | AT  | CT  |
| Same | AAGG-AATATATT---AAC-CAAGGCCACAG---GTTTC  | AGTG | GGC | CTAAAAGCA | GCC | AC  | CT  |
| Chch | TAAGGACCATAGTCAAC-----AAGGAC--ATCCGTTTC  | AGTG | GGC | CTAAAAGCA | GCC | AC  | CT  |
| Grgr | AAGG-GTCACACT--TTTT-CAAGGCAAAC---GTTCC   | AGTG | GGC | CTGAAAGCA | GCC | AT  | CT  |
| Caau | AA-AGATCATAATACATAA--AACATA----CT-GTTCT  | AGTG | GGC | CTAAAAGCA | GCC | AC  | CT  |
| Cyca | AAAG-ATCATAATACAT-----AAAACATAC--TGTTCT  | AGTG | GGC | CTAAAAGCA | GCC | AT  | CT  |
| Dare | AAAG-ATCATAATTTACA--AAACACGT--T---GTCGT  | AGTG | GGC | CTGGAAGCA | GCC | AC  | CT  |
| Cost | AGGG-ATTATAATTAATA--AAATTTATCG---TTTT    | AGTG | GGC | CTAAAAGCA | GCC | AT  | CT  |
| Leec | AAG-GGTCAAATTTTC-CAAAACCAGTC-----GCCTC   | AGTG | GGC | CTAAAAGCA | GCC | AT  | CT  |
| CrIa | AAGG-ATCATACT-TAAC--AAAACA-C-GTC--GTCTC  | AGTG | GGC | CCAAAAGCA | GCC | AT  | CT  |
| Clmc | AAG-GATCATATTAATAAGATTAC-----C---GCTTC   | AGTG | GGC | CTAAAAGCA | GCC | AC  | CT  |
| Phin | AAAG-ACTATACTTAC----TAAGAT-TA--C-TGCTTC  | AGTG | GGC | CTAAAAGCA | GCC | AC  | CT  |
| Icpu | AAAG-ATTATACT-AAATA---AG-ATACGCC--GCTCC  | AGTG | GGC | CTAAAAGCA | GCC | AT  | CT  |
| Psto | AAAG-ATTACA-TTAAAT-AAGATAAAAC---CGCTCT   | AGTG | GGC | CTAAAAGCA | GCC | AT  | CA  |
| Cora | AAGG-ATTATATTTA---C-AAAGATTACC---GCTTC   | AGTG | GGC | CTAAAAGCA | GCC | AT  | CT  |
| Eisp | AAGG-ACCACACTCATTT---AGACTCC-----TGCTCC  | GGT  | GGC | CTAAAAGCA | GCC | AT  | CG  |
| Apal | AA-AGATCATA--TACCCT--AAA-ACA--AC-TGTTTC  | AGTG | GGC | CCAAAAGCA | GCC | AC  | CG  |
| EsLu | AAGG-ATCATAA----TTACTAAGGC-ACC-T--GTTAC  | AGTG | GGC | CTAAGAGCA | GCC | AC  | CT  |
| Dape | AAGG-ATCATAATTA--TT-AAGGCTC--CT---GTTAT  | AGTG | GGC | CTAAAAGCA | GCC | AC  | CT  |
| Glse | AAGG-ATCATATTA--ACAAGGTGT--TCT---GCTTC   | AGTG | GGC | CTAAAAGCA | GCC | AT  | CT  |
| Naar | AAAG-ATCATAAT-AACT--AAGGTGAAC-T---GTTCC  | AGTG | GGC | CTAAAAGCA | GCC | AC  | CT  |
| Baoc | AAAG-ATCACAATA----ATTAAGGTCACCT---GTTCC  | AGTG | GGC | CTAAAAGCA | GCC | AT  | CT  |
| Opso | AAGG-ATCATAATAATTTAA----GGTGC-T---TGCCCC | AGTG | GGC | TTAAAAGCA | GCC | AC  | CT  |
| Alte | AAGG-ATCATACTCAA--C-AAGGTCAACC---GTTTC   | AGTG | GGC | CTAAAAGCA | GCC | AC  | CT  |
| Plap | AAGG-ATCACCTCAAC-----AAGGTGCGC--CGTTTC   | AGTG | GGC | CTAAAAGCA | GCC | AC  | CT  |



Plal AAGG-ATCAAAATTCTT- - - -A-AGGAAAAC--TGTTTCAGTGGGCCTAAGGGCAGCCACCTG  
 Sami AA-GGATCATAATT--TT--GAAGGCATACTGTTCC--CAGTGGGCTTAAGGGCAGCCATCTG  
 Rere AAGA-ATCAAAGT--AAC--TTAGGTTAGCT--GCTTCAGTGGGCTTAAGGGCAGCCATCTG  
 Gama AATG-ATCATATA-TAC--CAAGGG-CCTG--TGCTCCAGTGGGCTAAAAGCAGCCACCTG  
 Onmy AAGG-ATCATA--GTTCC-AAGGTAA-CCT--GTTACAGTGGGCTAAGAGCAGCCACCTG  
 Sasa AAGG-ATCATAATTA----CTAAGGCAACCT--GTTACAGTGGGCTAAGAGCAGCCACCTG  
 Cola AAGG-ATCATAATTA----CTAAGGTAACCT--GTTACAGTGGGCTAAGAGCAGCCACCTG  
 Dita GA-GGATCATAAT-ACTTA--AGGTGAAC--TATCT--TAGTGGGCTGAAAGCAGCCACCTG  
 Gogr AAAG-ATCATAA--ACCAC--AGGC-CTCAC--GTTATAGTAAGGCCAAAAGCAGCCACCTA  
 Chsl AAGA-AGCACAA--CAAG--AAAGGT-CACC--TGTTTTAGTGGGCTAAAAGCAGCCACCTA  
 Atja AA-AGATCATAATTAACTA--AGGAAATT-GTTC----TAGTGGGCTAAAAGCAGCCACCTA  
 lido AAA-GATCATA--ATTAGCAAGGAAATTGT-----TCTAGTGGGCTAAAAGCAGCCACCTA  
 Auja AAAG-ATCATAAAAGC--ACAAAGGAAACTT--GTTCTAGTGGGCTAAAAGCAGCCACCTA  
 Chag AAAG-ACCAGAGTTA-AAC-AAGGGGCAAAA--ATTTTAGTGGGCTAAAAGCAGCCACCTA  
 Hami AAAG-ATCATAATTA-ACC-AAAGGAGCCTT--ATTTTAGTGGGCTAAAAGCAGCCACCTA  
 Saun AAAG-ATCATAATTA---CCCAAG-GAGTCTTATTTTAGTGGGCTAAAAGCAGCCACCTA  
 Nema AAAG-ATCATACTTCACTT--AAAGGAAGCC--TGTTCAAGTGGGCTAAAAGCAGCCACCTA  
 Disp AAGG-ATCATA-ATCAACCCAAGGAAACT----TGTTTTAGTGGGCTAAAAGCAGCCACCTA  
 Myaf AAAG-ATCAAATTCC--ACTAAGGAAACCT--ATTCTAGTAAGGCCAAAAGCAGCCACCTA  
 Lagu AAT--ATATTAGC-TACC-CAAGGTA-A-ACT--ATCCAAGTAAGGCCAAAAGCAGCCACCT  
 Trtr AAAA-ATCATT-TAATCA--AGGTATTTGTG--GCCCAAGTAAGGCCAAAAGCAGCCACCA  
 Zucr AAAA-ATCATTTTACT-T--AAGGTCACTACA--GCCTTAGTAAGGCCGAAAGCAGCCACCA  
 Pxja AAAG-ATCAAAATTATTTA-CTAGGTATATT--GTTTTAGTGGGCTAAAAGCAGCCATCTT  
 Pxlo AAAG-ATCAAAATTATTTA-CTAGGTATAT--TGTTTTAGTGGGCTAAAAGCAGCCATCTT  
 Pctr AA-AGATCATA--TAAAC--A--AGGAAAAT-TATCCCAGTGGGCTGAAAGCAGCCACCTA  
 Apsa AA-AGATCATATATTA----G--ACAGGGACTTAACCAAGTGGGCTAAAAGCAGCCACCC  
 Cabe AAGG-ATCATAACTTATTA-TAAGGCCTCGT--GCTGTAGTAAGGCCGAAAGCAGCCATCTA  
 Bzze GAAG-ATCACA--TTAACT-CAAGGTAGCAT--ACCCCAGTGGGCTAAAAGCAGCCACCC  
 Siim AAAG-ATCATA--ATTTTA-AAAAGCAACGT--ACTAAAGTGGGCTAAGAGCAGCCACCTA  
 Ctru AAAG-ATCACATCCGC--TTAAGGTAAAAT----ATTTTAGTGGGCTAAAAGCAGCCACCA  
 Dpbr AAAG-ATCATG-CCCGCCC--AAGGTA--CTATATTTTAGTGGGCTAAAAGCAGCCACCA  
 Caki CAGG-ATCATA-TCAATCAAGGACTAA--AA---TTTAGTGGGCTAAAAGCAGCCACCTT  
 Phja CAAG-ATCATACTATCAAA----GGA-TTTTA--ACCTAAGTGGGCTAAAAGCAGCCATCTA  
 Brsp TAAG-ATCATAATGTT----TAAGG-ATA--CTAATTTTAGTAAGGCCAGAAGCAGCCACCTA  
 Gamo CAAG-ATCATATTACC--CAAG-GATTTCAA--ATTAAGTGGGCTAAAAGCAGCCATCTT  
 Lolo CAAG-ATCATATTACCA--AGGATTCCAA--ATTAAGTGGGCTAAAAGCAGCCATCTT  
 Batr ATGG-TTCACA-----CTAAACAAAACATTTTATAAGTAAGGCCAAAACCAGCCACCA  
 Prmy AAA-GTTCATATTA---AATCACCC-AC---TTTAGAGTAAGGCCTTAATACCAGCCACCC  
 Loli AAAG-ATCATAATATT----TTAAGGAAAA-GTACTGTTAGTGGGCTAAGAGCAGCCACCC  
 Loam AAAG-ATCATAACGAAATTT--AAAGGAAAGT--CCTCTTAGTGGGCTAAAAGCAGCCACCC  
 Chab AAAG-ATCCTACCAAGACATTAAGGCATCAT--ACTTAGTAAGGCCAAAAGCAGCCAACCT  
 Chto AAAG-ATCCTACCAAAAACATTA--GGCATCAT--ACTTAGTAAGGCCAAAAGCAGCCAACCT  
 Majo AAAG-ATCATA-TTTTTCATAAGGTTCTA----TGCTTAGTGGGCTGAGAGCAGCCACCT  
 Hlst AAA-GATCACTTTAAAC--AAGGATGT-AC--ATCAAAGTGGGCTAATAGCAGCCACCT  
 Clpe AA-AGATCGTG--CACACT--TACG-----TACTTAGTGGGCTAAAAGCAGCCACCC  
 Mlmr AAAG-ATCATA--TATT--AAAC-CG-TA-T--ACTAAGTGGGCTAAAAGCAGCCACCT  
 Crcr ACAG-ATCATATTTT-CTTAAGGAACCTTAT--GCCTTAGTGGGCTAAAAGCAGCCACCA  
 Muce ACAG-ATCATATTTTACT--TAAGGAACCTA--TGCCCTTAGTGGGCTAAAAGCAGCCACCA  
 Bege AAG-GATCAAATTTAC----CAAGGTTAAAT--ACCCAAGTGGGCTAAAAGCAGCCACCT  
 Mela AAAG-ATCAAATTCATA----AAGGTAAGTC--ATTGAAGTGGGCTAAAAGCAGCCACCT  
 Hats AAGG-ATCAAG--CTCAAC-CAAGGCACAAT--ATTTTAGTGGGCTAATAGCAGCCACCC  
 Orla AAAA-ATCACAAT-ATTA--AAGGTCAA--T--GCCCAAGTGGGCTAAAAGCAGCCACCT

Cosa AA-AGATTAATAAATACT-----TAAGGCATTATGTTTTAGTGGGCCTAAAAGCAGCCACCT  
 Exsp AA-AAATCAAACCTAAGTTA----AGGCCTTA--TGTTCAAGTGGGCCTAAAAGCAGCCACCT  
 Depa AAAG-ACTATATTAA---C--AAAGGCATTA--CGTTTAAGTGGGCCTAAAAGCAGCCAACCT  
 Rima AAAATATTATA-----CAAGG-GC-CAT--TCCTCAGTGGGCCTAAAAGCAGCCACCT  
 Fuol AATA-ATTATA-AATCAT-AAAGTTCA-----TGCTTAAGTGGGCCTAAAAGCAGCCACCT  
 Gmaf AATA-AACATAAA-AAAT-T--AGGTA-AGT---GCCAAGTGGGCCTAAAAGCAGCCACCT  
 Xeei TA-TAATCAAATAAATTA--AAGCTAAT---GTTTTATGTGGGCCTAAAAGCAGCCATCA  
 Pros AAAG-ATCACA---AGTACTAAGGAAGAA-T--GCTCCAGTGGGCCTAAAAGCAGCCACCT  
 Scmi AAA-GATCATAAGTACCAAGGAAAATATTGT---GCCCCAGTGGGCCTAAAAGCAGCCATCC  
 Rolo AAAG-ATCATA-ATTA--CCAAGGAAAAG---TGTTTCAGTGGGCCTAAAAGCAGCCACT  
 Cere AAGG-ATCATA---TAT-A-TAAAGGTACGT---ACCTCAGTGGGCCTAAAAGCAGCCACT  
 Daga AAGG-ATCATACTTATTA--A-GGCAGG--T---GCCTGAGTGGGCCTAAAAGCAGCCACT  
 Anco AAAG-ATCAAATAA--TAAAGGAAA--AAT---GTTTCAGTGGGCCTAAAAGCAGCCACT  
 Dmve ATAG-ATCAAATTA---ACAAGGCA--CATGTCTTAGTGGGCTTGAAGCAGCCACCT  
 Dmar ATA-GATCAA--ATTAAGCAAGGTAT--GT---GTTTTAGTGGGCTTGAAGCAGCCACT  
 Anka AAA-GATCAAATTGCAAAGGAAA---AT---GTTTATGTGGGCCTAAAAGCAGCCACCT  
 Moja AAAG-ATCAAATTACA-----AAGGAA--AAATGTTTCAGTGGGCCTAAAAGCAGCCACT  
 Hoja AAAG-ATCAAATTA-TA---AAGGAA--AAATGTTTCAGTGGGCCTAAAAGCAGCCACT  
 Bede AAAG-ATCATAATTATTA--AGGAAACAAG--TGCTCCAGTGGGCCTAAAAGCAGCCACT  
 Bosp AA-AGATCATAATTACC-----AAGGAATCAGTGCTCCAGTGGGCCTAAAAGCAGCCACT  
 Mysp AA-AGATCATAAT-TATCA---AGGACAAA--TGTTACAGTGGGCCTAAAAGCAGCCACT  
 Osja AAAG-ATCATAATTA---C-CAAGGA-CGGA--TGTTCCAGTGGGCCTAAAAGCAGCCACT  
 Sgro AAAG-ATCATAATAA---CAAGGGTAGAT---GTTTTAGTGGGCCTAAAAGCAGCCACT  
 Pzpa AAAG-ATCAAATTA-----A-TTAAGGAGCCTTATTTAGTGGGCCTATAAGCAGCCACT  
 Zeja AAAA-ATCAAACCTAGA--TCAAGGAACCTC----ATTTTAGTGGGCCTAAAAGCAGCCACT  
 Znne AAA-GATCAAATAAAT---TAAGGATTATT---ATTTTAGTGGGCCTAAAAGCAGCCACT  
 Zefa AA-AGATCAAATAAATT---AAGG--AGTCCTATTTTAGTGGGCCTAAAAGCAGCCACT  
 Acni AAA-GATCAA-ATAGATTAAGGAACCTTAT-----TTTAGTGGGCCTAAAAGCAGCCACT  
 Ncrh AAAG-ATCAA-ATAGAT-TAAGGAACCT----TATTTAGTGGGCCTAAAAGCAGCCACT  
 Agca AAAG-ATCAAATTAC--CTAAAGGTAATA---GTTTTAGTGGGCCTAAAAGCAGCCACT  
 Hydy AAA-GATCATACTAAGCAAGGAA--AGT-----ACTCCAGTGGGCTTGAAGCAGCCACT  
 Gsac AAAG-ATCATAATAA--ACAAAGGGAAGT----ACTCTAGTGGGCTTGAAGCAGCCACT  
 Pevo AAAG-ATTATAAT-TTTC-A--AGGCAT-GAT--ACTCAAGTGGGCCTAAGAGCAGCCACT  
 Hiku -AAAGATCAAATAATA---AAGTTC--ACATGCCTTAGTGGGCCTGAAAGCAGCCACT  
 Inpa AAAA-ATACAA--CA-CCC-AAGATACAAC---ACCACAGTGGGCCTAAAAGCAGCCACT  
 Auch AAAG-ATCATTTTACCTC--AAGGCCTTAC---CCGCAGTGGCTTGAAGCAGCCACT  
 Fico AA-GGATCATACACAT-----AAAG--CACGATGCACCAGTGGGCCTAAAAGCAGCCACT  
 Macs AAAG-ATCATAATCACGAC-AAGGCAA-AAT---GTTCCAGTGGGCCTAAAAGCAGCCACT  
 Moal AAAG-ATCATAATAAT--C--AAGGTACCAA--CTTTTAGTGGGCCTAAAAGCAGCCACT  
 Syma ACGG-CTCATTATATC---TAAAGGCATTTT--ATACCAGTGGGCTTAAAAGCAGCCACT  
 Maf r AA-AGATTATAA-TACCTC--AAGGA--AATA-TGTCTAAGTGGCCTAAAAGCAGCCACT  
 Dcpe AAAG-ATCATA--ATTC-TCAAGG--TAAA--GTATTAAGTGGGCTTAAAAGCAGCCACT  
 Dct i AAAG-ATCATA-ATTT--TTAAGGTAAAG-----TATTAAGTGGGCTAAAAGCAGCCACT  
 Hehi AAAG-ATCATAAT-TAAA--TAAAGG-TAAG--TATTTAGTGGGCCTAAAAGCAGCCACT  
 Stam AAAG-ATCATAACAAA----TTAAAGG-CATAATGTTTTAGTGGGCCTAAAAGCAGCCACT  
 Hogi AAG-GATCATA-TTAAAAATAAGGACATTAT---ACTCTAGTGGGCCTAAAAGCAGCCACT  
 Erzo AAAG-ATCATAATAA---CAAAGGCAAAT---ATTTAGTGGGCCTAAAAGCAGCCACT  
 Hxot AAAG-ATCATAATAA---TTAAAGCTAAT---GTTCTAGTGGGCCTAAAAGCAGCCACT  
 Core AAAG-ATCATAATAAC-TA---AAG-CTAGAT--GTTCCAGTGGGCCTAAAAGCAGCCACT  
 Apve AAAG-ATCATAATAAC----TAAAG-CTA--AATATTCTAGTGGGCCTAAAAGCAGCCACT  
 Lat j AAAG-ATCATAATCT-AAC-AAGGCA-AAAT---GTTCCAGTGGGCCTAAGAGCAGCCACT  
 Laja AAAG-ATCATA-ATAAGAATAAGGTAATA---TGTTTTAGTGGGCCTAAAAGCAGCCACT

Syja AAA-GATCATAATATATTTTAAGGTAATCGT---GTTCTGGTGGCCTAAAAGCAGCCATCC  
 Epme AAAG-ATCATAATTA-AAT-AAGGCA-AAAC---ATCAGGGTGGCTTGAAGCAGCCATCC  
 Grse TAAG-ATCATAATAA----TCAAGGCAATGT---GTCCCAGTTGGCCTAAAAGCAGCCATCC  
 Clja CTGG-ATCATATTAGTTTATAA-AGGTAAT--ATATAAGTGGCTTAGAAGCAGCCATCA  
 Ogcy -AAAGATCACAAT--TAACCCA-AGGCATTAA--ACCCAAGTTGGCTTAAAAGCAGCCACCC  
 Plna AA-AGATCACAGCACCATA--AAGGC--AAA-GTACATCAGTGGCCTAAAAGCAGCCACCC  
 Lema AAAG-GTCATAAT-AAAC--AAAAGTAGGAT---GTTCTGGTGGCCTAAAAGCAGCCATCC  
 Etzo AAAG-ATCATAATTACAGA---AG-GTATAAT--ATTTAGGTGGCCTAAAAGCAGCCATCC  
 Apse TAAG-ATCACAGC-ACTTATTAA-GGGAACGT--GTTCTAGTTGGCCTAAGAGCAGCCACCA  
 Epde AAAG-ATCATAATTAA----TTAA-GGTAA-AATGTTCTGGTGGCCTAAAAGCAGCCACCC  
 Slja AAAG-ATCATATTTATATT---AAGGCT--AAGTGTCCGAGTGGCCTAAGAGCAGCCACCC  
 Bsja AA-AGATCATATTCACATTTA--AAGGTAAGCATGTTCTGGTTGGCTTAAAAGCAGCCCTCC  
 Ecna ATAG-ATCATAAT---ACT-AAAGGTAAT---GTTTTAGTGGCCTAAAAGCAGCCACTA  
 Cohi AAAG-ATCATATTA--TTTAAAGTA-----AAAATCTCAGTGGCCTGAAAGCAGCCACCA  
 Caar AAAG-ATCATAATTTTCAA---GGCA---AACGTTTTGGTGGCCTAAAAGCAGCCATCC  
 Came AAAG-ATCATAATT-----TT-TAAGGAAGAATGTTCCGGTGGCCTAAAAGCAGCCATCC  
 Mema ATCA-ATCATA--TTA-TT-CAAGGCAAAAT--GCCAAGGTGGCCTAAAAGCAGCCATCC  
 Lenu AAAG-ATCATA-TTCCCTA---AGGAAA--CCCTGCTTAAAGTGGCCTAAAAGCAGCCACTT  
 Brja AA-AGATCATA--ATCACC--AAGG--ACATA-TGCCCTAGTGGCCTAAAAGCAGCCACTA  
 Plma AAAG-ATCATAATTA-----CTA-AAGGTAATATGCCCTGGTGGCCTAAAAGCAGCCACCC  
 Emst AAA-GATCATAATAAATTTAAAGGTAAT---GTTTTGGTGGCCTAAAAGCAGCCATCC  
 Ptti AA-AGATCATATTTAAATT--AAA--GGTAGTATGTTTTAGTGGCCTAAAAGCAGCCATCC  
 Losu AA-AGATCATAACAACCCT--AAA--GGTAGGGTGTGTTTTGTTGGCCTAAAAGCAGCCACCC  
 Geoy AAAG-ATCACACCCACCC-TAAGGT-TAGA--TGTTCCAGTGGCCTAAAAGCAGCCACTC  
 Dipi AAAG-ATCATAATCAAATC--AAAGGTAATA--GTCCAAGTGGCCTAAAAGCAGCCATCC  
 Pama AAAG-ATCATAATTAACC--CAAGGTAAGC--ACCCAGGTGGCCTAAAAGCAGCCACCA  
 Leob AA-AGATCATAAACCCCTC---GAAGG--ACGGTATTAAAGTGGCCTAAAAGCAGCCACT  
 Neba AAAG-ATCATAATTTCA-ACAAAGGTAGAAT--ATTCTGGTGGCTTAAAAGCAGCCACTA  
 Pdpi AAAG-ATCATAGT-ATTC-TAA-AGGATCTCC--GTCTTAGTTGGCTTGAAGCAGCCACCA  
 Nimi ATAG-ATCACATTCAAATTCAGGTAAT---GTTTTGGTGGCCTAAGAGCAGCCACCC  
 Uptr AAAG-ATCATATT-TTAT-ATAA-GGTGCTAT--GTCTTAGTGGCTTAAAGAGCAGCCACCT  
 Pesc GTGG-ATCAAAATATGAC--AA-GGTA-ACC---CCCTGGTGGCCTGAAAGCAGCCATCC  
 Baar AAAG-ATCATAACAA--CCAAAGGTACAAAT--GTCCTGGTGGCCTAGGAGCAGCCACCC  
 Moar AAAG-ATCATAATTAACCTA-AAGGCAAAAT---GTTCTGGTGGCCTAAAAGCAGCCATCC  
 Toja AAAG-ATCATATTAACC--AAGGCAGAAT--GTTTAGTGGCCTAAAAGCAGCCACT  
 Chau AAAG-ATCATAATTA-AAC-AAGGCAAGA---GTCTAAGTGGCCTAAGAGCAGCCACCC  
 Chse AAA-GATCACAATTTAAACAAGGAATAA-----TATCTAGGTGGCCTAAAAGCAGCCACTA  
 Enar AAA-GATCATATTTAAACAAGGTAAT-----GTTCTGGTGGCCTAAAAGCAGCCATCC  
 Hpty AAAG-ATCATAATAAAT--AAAGGTAGAAT---GTTCTGGTGGCCTAAAAGCAGCCACT  
 Nana ATCG-ATCATAATATAA---CAA-GGCAACAT--ACCCTAGTGGCCTAAAAGCAGCCACT  
 Mcst AAA-GATCATAATAAGCC--AAGGCAAA-AT---GTTCTAGTGGCCTAAAAGCAGCCACTA  
 Rhox AA-AGATCATAATAAAT--TAAG--GTAAGATGTTCTGGTGGCCTAAAAGCAGCCACT  
 Opfa AAAG-ATCATAATAAAT--AAAGGTAAT---GTTCTGGTGGCCTAAAAGCAGCCACCC  
 Paar AAAG-ATCATA-TTCTCAA-CAAAGTATTT--TATTCTGTTGGCCTAATAGCAGCCACTA  
 Gozo AAAG-ATCATAGTAA-AAT-AAGGTAGAAT----GTTCCGGTGGCCTAAAAGCAGCCACT  
 Ackr AAAG-ATCATATC---GTCTAAGATAAA-AA--TCCCTGGTGGCTTAAAAGCAGCCACT  
 Elev AAAG-ATCACAAACAAC-----AAGGATGAG--TGTTCAAGTGGCTTAAAACCAAGCCACTA  
 Trdu AAAA-ATCACAAAC-AACTTAAAGGAT-AGAT--GTCCTAGTGGCCTAAAAGCAGCCACTA  
 Amoc AAAG-ATCATACCCATTTT-AAGGAAA-AAC---GCTTTGGTGGCCTAAAAGCAGCCACTA  
 Hame AA-AGATCAAAGTTAAC-----AAGG--ACCAGTCTTAAAGTGGCCTAAAAGCAGCCACT  
 Chso AAAG-ATCAAAAT-AACTAT--AGGAGA-GCAT-GTTTTAGTGGCTTAAAGAGCAGCCACT  
 Lyto AAAG-ATCATAA--TACC--TAAAGG-AGAA--TATTTGGTGGCCTAAAAGCAGCCACT

Encr AA-AGATCATAAT-AAACC--AAAGG--TAA-ATATTTGGTGGGCCTAAAAGCAGCCATCC  
 Bvar AAAG-ATCATAATAAC--T--AAGGTAA-CA---CCTCCCGTGGGCTCGAAAGCAGCCACCC  
 Noco AAA-GATCATAATTACA---CAAGGTAAGTA---ACTCTCGTGGGCCGAAAGCAGCCACCC  
 Chsp TAGG-ACCATAAACCCATA----AGACAACAT--ACTTTTCTGTTAAAAGCAGCCATCAG  
 Arja AA-AGATCATAAT-AATTA--A--AGCTGAA--TACTCTGGTGGGCCTAAAAGCAGCCATCC  
 Pase ATAG-ATCATAATACAA-G-CAAGGCTCAAT---GTTCCCGTGGGCTAAGAGCAGCCACCG  
 Trel AAAG-ATCGTATTTACGT----AAGGAC--TTGTGACAACTGTTGGCCTAGAAGCAGCCATCAT  
 Lifa AA-AGATCATAGTCA-TA---CA--AGG-AGACTGCTCAGGTGGCCTAAAAGCAGCCACCT  
 Acur GAAG-----ATA-TTTAA-AAGGTAT-AAA---TGTCCTGTTGGCTTAAAAGCAGCCATCAC  
 Ampe TAAG-ATCATATTAATAA--AAAGGCAAAAT--GTTCTGGTGGGCTAAAAGCAGCCATCC  
 Urja AAA-GATCATA-CAAACCTCAAGGCACAGT-----GTTTTGGTGGGCTAAAAGCAGCCACCA  
 Enet AAAG-ACCATAATAGC--T-AAGGTAAAAC----ACATTAGTAGGGCTAAAAGCAGCCATCT  
 Ptbr AAAG-CTTATAATACAT-T-TTAGGT-TAAA--TACACTCGTGGGCTTAAAAGCAGCCATCTA  
 Safa AAGG-ATTAAC-CTAATAA---AGGCAC--CCGTACACTAGTTGGCTTAAAAGCAGCCATCT  
 Icae AAAG-ATCATAATTAATA--AAGGTAACAAT---GCCCTGGTGGGCTAAGAGCAGCCACCT  
 Asmi AAAG-GTCCTATT--CAA--AAAGGTTAAAA---ACTAGGGTTGGCTTAAAAGCAGCCAGCC  
 Foal AAGG-ATCATAAA-CAACCTTAAGGTATTAT---ATTTAAGTTGGCTTAAAAGCAGCCACCT  
 Drze AAGG-ATCAAAA--TATT--AAAGGTATT-T---ACTTGGTTGGCTTAAAAGCAGCCAAACC  
 Rhas AAAG-ATCAAAGCACCTCA---GGC-ATTAT--GTTTTAGTTGGCTAAAAGCAGCCACCT  
 Elac AAAG-ATCAAAAAGATA----AAAGGCATTAC---ATTCAAGTTGGCTAAAAGCAGCCACCT  
 Kugu AAA-GATCCTAGTACAAAACCTAAGTAAC--T---GTTACTGTTGGCCAAAAGCAGCCATCAA  
 Plor TAAG-ATCATAATTAAC--CAAGGCATAAT---GTTCTGGTGGGCTAAAAGCAGCCACCC  
 Sgun AAAG-ATCACACTAAACTATTAAGGTTCTG--TGTTTAAAGTTGGCTAAAAGCAGCCATCC  
 Zaco AAA-GATCATAATTAGACCA--A-GGCAAAA--TGTTTTAGTTGGCTTAAAAGCAGCCACCT  
 Zbfl AAAG-ATCATA-ACTA--TTAAGGCGTAA----TGTTTTGGTGGGCTAAAAGCAGCCATCC  
 Spba AAAG-ACCATA-CTAT-AT-CAAAGAATTAA--TGTTTTCTGTTGGCTAAAAGCAGCCACCT  
 Game AAAG-ATCATAATTA--AC-AAGGTAATAAT---GCCCTGGTGGGCTAAAAGCAGCCATCC  
 Thth AAAG-ATCATATTTACCC--AAGGTAACAA--TGCCCAAGTTGGCTAAAAGCAGCCATCC  
 Xigl AAAG-ATCATAAT-AA----TCAAGGA-AC-AATGTTCTGGTGGGCTAAAAGCAGCCATCC  
 Hyja AAAG-ATCATAATT--ACTAAAGGGA--CAT--GCCCTGGTGGGCTTAAAGAGCAGCCACCA  
 Psan TAA-GATCATAATTAAT---TAAGGGAT-GT---GCCCTGGTGGGCTTAAAGAGCAGCCACCA  
 Cupa AAAG-ATCATAAT-TACT-AAAGGCAAT-AAT--GCCCTGGTGGGCTAAAAGCAGCCACCT  
 Mpch AAA-GATCATAATAACTAAAGGATAAGT-----GTTTTAGTTGGCTAAAAGCAGCCATCTA  
 Char AAAG-ATCATATTA--CCAAAGGGAA--A---ATGTTTTAGTTGGCTAAAAGCAGCCACCTA  
 Pser AA-AGATCAAAATATACCA--AGGAA--ATA--TGTTCTGGTGGGCTAAGAGCAGCCATCC  
 Prol AAAG-ATCATACTCAATC--AAGGACAAA-T---GTTTTAGTTGGCTAAAAGCAGCCACCT  
 Plbi AAAG-ATCATATT--CAAA-TAAGG-ACAGAT--GTTTTAGTTGGCTAAAAGCAGCCACCT  
 Calu AA-AGATAGCA-----ACC--AA--GGGCAG--CGCTTCAAGTTGGCTGAAAGCAGCCAACT  
 Papa AAG-GATCACACTGATCACAAAGGAGTATGT---A-CCCTGTTGGCTTAAAAGCAGCCACCT  
 Suf r TAA-GATCAAATTAATTA--AAAGGCATTAT---GTTTAAAGTTGGCTAAAAGCAGCCATCC  
 Stci AAA-GATTATA--AT-AGTTAAGGGACTAAT---ATTTTGGTTGGCTGAAAGCAGCCATCC  
 Taru AAGG-ATCATAAAA--AATCAAGGCACC-GC---GCTTAAGTAGGGCTTAAAAGCAGCCACCA  
 Rala AAAG-ATCATATTTACTA---AAGGTC--TGATGTTAAAGTTGGCTAAAAGCAGCCATCC

\*\* \*\* \* \* \* \* \*

|      | 23      | 23'     | !           | HVR                  | !           |                       |
|------|---------|---------|-------------|----------------------|-------------|-----------------------|
| Scca | --TTAA  | GTAAGCG | GTCACAGCTC  | TAGTTTTTTTAA         | --A----     | ACCCA--TAATTTA        |
| Muma | --TTAA  | GTAAGCG | GTCGCAAGCTC | CAGTCTAACAC          | --TAA----   | A--CCTATAATTTA        |
| Erca | T---    | TAGATA  | GCGTTATA    | GCTCAAATA            | ---ATACTCCA | -----CCCAAA-TATCCG    |
| Pose | --TAAA  | GAAGA   | GCGTTATA    | GCTTAAATACT          | --C---      | AAA----AACCCGAATATCCT |
| Actr | C--ACA  | GAAGA   | GCGTTAAA    | GCTCAGACAAAA         | -CCC-----   | CACCCTATTATCCC        |
| Scal | --CACAG | GAAGA   | GCGTTAAA    | GCTCAGACAAAACCTC     | --A-----    | TCCCA--TTATCCC        |
| Posp | --CACAG | GAAGA   | GCGTTAAA    | GCTCAGACA            | --AAAC--TCC | ----ACCCTA-TTATCCC    |
| Atsp | C--ATAG | GAAGA   | GCGTTAAA    | GCTCAGGCAGAAATCC     | -CCC-----   | AATT---ATAAC          |
| Leoc | C--ACA  | GAAGA   | GCGTTAAA    | GCTCAGGCAGAAG        | ---CCA----- | TCCAATTATAAC          |
| Amca | --AAAA  | GAAGA   | GCGTTAAA    | GCTCAAGCAGG          | --A---C-A   | ----TACCCAATTATACC    |
| Osbi | A--TTA  | AAAA    | GCGTTAAA    | GCTTAAACA            | ---GAAAACAA | -----ACCTATCATCCC     |
| Pabu | T--AAA  | GAAGA   | GCGTTAAA    | GCTCAAGTAAA          | ----ACATA   | ----AGCCTATTATTAC     |
| Hial | --AGTAG | GAAGA   | GCGTTAAA    | GCTCAGGCA            | --GAATCAAA  | ---ACCTATT----ATCCT   |
| Elha | A--ACA  | GAAGA   | GCGTCAAA    | GCTCAGGCAGGACCACA    | -TT-----    | AACCTATTATTCT         |
| Mlcy | --TACAG | GAAGA   | GCGTCAAA    | GCTCAAGCAAACAAACA    | -----       | AGTCCATTATTAC-        |
| Algl | G--ATA  | GAAGA   | GCGTTAAA    | GCTCAGGTAAA          | -ATTTAA     | -----CCTTTAATACT      |
| Ptgi | T--ATAG | GAAGA   | GCGTTAAA    | GCTCAAGCA            | ---GAATTAA  | ----ACCCGT-AATACC     |
| Alaf | TCAATA  | GAAGA   | GCGTTAAA    | GCTCAGCAGAAGAAAACCC  | -----       | CT-----AATTCC         |
| Nock | TTAACA  | GAAGA   | GCGTTAAA    | GCTCAGGCA            | -----GGAA   | ----GATCCTATAATTCC    |
| Anja | T--AAA  | GAAGA   | GCGTTAAA    | GCTCCGGTA            | -AA--TACAGA | -----CCA-ATAATAAA     |
| Gyki | --TAAA  | GATA    | GCGTTAAA    | GCTCAAGCA            | ---TACTTTA  | ---ACCAAGAA---TGTA    |
| Syka | --AACAG | GAAGA   | GCGTTAAA    | GCTCCGGCA            | ---GAA--AAC | ----TCACCAATAATAAA    |
| Opma | --GAAA  | GAAGA   | GCGTTATA    | GCTCAAGGA            | -AGAACC--C  | ----ACCAA--CAATAAC    |
| Comy | T-AATA  | GAAGA   | GCGTTAAA    | GCTCAAGAACAGCC       | ----A-----  | CA-CCAAAAATAAA        |
| Sasp | T--AAA  | GAAGA   | GCGTCAAA    | GCTCAGACAC           | --AAGACAA   | -----TAAATAATAAT      |
| Eupe | T--AAA  | GAAGA   | GCGTCAAA    | GCTCCGTATAGAACAAA    | -T-----     | TGC--AATCAC           |
| Enja | A--TCT  | GAAGA   | GCGTTAAA    | GCTCCGGC             | ---CAAAGAA  | ----AGCCTTTTATTTA     |
| Same | A--ACA  | GAAGA   | GCGTTAAA    | GCTCAGACCAA          | -----TCCA   | ----AGCCTATTATAAC     |
| Chch | --AACAG | GAAGA   | GCGTTAAA    | GCTCAGACGGAA         | -AA--TAT    | ---AATCCTATTATCCC     |
| Grgr | --TTGAG | GAAGA   | GCGTTAAA    | GCTCGGACTG           | --AACTCAA   | ----TCCT--ATTATGCC    |
| Caau | --AACAG | GAAGA   | GCGTTAAA    | GCTCAGACAGAC         | -A--GAAG    | ----T--TTATTA-TCCT    |
| Cyca | A--ACA  | GAAGA   | GCGTTAAA    | GCTCAGACA            | ---G-AAAAA  | ----G-TTTATTATCCC     |
| Dare | --AAAA  | GAAGA   | GCGTTAAA    | GCTCAGGTAAGAAGAAATT  | ---CATA     | -----ATTCT            |
| Cost | A--GCA  | GAAGA   | GCGTTAAA    | GCTCAAAC             | ---GATGTAA  | ----ATTTAT-TATTTT     |
| Leec | --AACAG | GAAGA   | GCGTTAAA    | GCTCAAGCG            | ---ACATAAA  | ----GTT--TATTATTCT    |
| CrIa | --ATCAG | GAAGA   | GCGTTAAA    | GCTCAAACGAC          | ---ACAA     | ----AGTTTA-TTATTCT    |
| Clmc | --GTCAG | GAAGA   | GCGTTAAA    | GCTCAGGCA            | -----GATTAC | ----AAATCTATTATCCC    |
| Phin | T-CTAA  | GAAGA   | GCGTTAAA    | GCTCAAACAGAAA        | ---AAA      | -----ATCTATTATCCC     |
| Icpu | --AACAG | GAAGA   | GCGTTAAA    | GCTCCGGCAGACTACA     | -A-----     | TCTA--TTATTTA         |
| Psto | --AACAG | GAAGA   | GCGTTAAA    | GCTCTGGCGGGATAA      | --AA-----   | ATCCA--TTATACA        |
| Cora | A--ACA  | GAAGA   | GCGTTAAA    | GCTCAAGCAGACAA       | -----A      | ----AATCACTTATACC     |
| Eisp | C--ATAG | GAAGA   | GCGTTAAA    | GCTCAGGCA            | ---G-ACAAAA | ----GTCTATA-ATTCA     |
| Apal | --TATAG | GAAGA   | GCGTTACA    | GCTCAAACAGATTAA      | --ATC       | ----T----AACAAATCCA   |
| EsLu | --TGTAG | GAAGA   | GCGTTAAA    | GCTCAGACAGA          | ----TACC    | ----AGCTC--TTATTCT    |
| Dape | T--AAA  | GAAGA   | GCGTTAAA    | GCTCAAACAGATG        | -----CC     | ----CGCCTCTTATCCT     |
| Glse | T--GCA  | GAAGA   | GCGTTAAA    | GCTCAAACAGACTACAAACC | -----       | TTTT---ATTCT          |
| Naar | --CACAG | GAAGA   | GCGTTAAA    | GCTCAGACAGACAAACAAA  | ---CCTTTT   | -----ATCCC            |
| Baoc | C--ACA  | GAAGA   | GCGTTAAA    | GCTCAGACAGA          | --CAA-CA    | ----AATTTTTTATCCT     |
| Opso | A--ACA  | GAAGA   | GCGTTACA    | GCTCAGACAAACCCCTTTTA | -----       | AACCTTTTTATTCT        |
| Alte | C--ACA  | GAAGA   | GCGTTAAA    | GCTCAGACG            | ---GACCAA   | ----GACCCTTTATTCT     |
| Plap | C--ACA  | GAAGA   | GCGTTAAA    | GCTCAGACG            | ---G-ACCAA  | ----GACCCCTTATCCT     |

Plal A--TTA**GAAA**-**GCG**TTAAA**GCTC**AGACA----GTATAGT-----CCTCTTATCCT  
 Sami --ACTA**GAAA**-**GCG**TTAAA**GCTC**AGGCAGCAC-----A-----CA-CCTCTTATCCT  
 Rere --AATC**GAAA**-**GCG**TTAAA**GCTC**AGGCA-GCGACCG-----C-CCACTTATTCT  
 Gama C--TC**A****GAAA**-**GCG**TTAAA**GCTC**AGACAC--CCCTCAGC-----CCCTTT-TATTTT  
 Onmy C--ACA**GAAA**-**GCG**TTAAA**GCTC**AGACAGAT---ACAAA-----C-CTCTTA-TCCT  
 Sasa C--ATA**GAAA**-**GCG**TTAAA**GCTC**AGACA---GATA-TAA-----GCCTCTTATCCT  
 Cola C--ATA**GAAA**-**GCG**TTAAA**GCTC**AGACAGACAC-----G-----AACCTCTTATTTT  
 Dita --GACA**GAAA**-**GCG**TTAAA**GCTC**AAACAGATCAGCCTTT----AAACCTCTAATTTG  
 Gogr --TTC**A****G****A****G**-**GCG**TTACA**GCCC**AAGCAAATCACA--C-----CCCC--CCATCTC  
 Chsl A--ATA**GAAA**-**GCG**TTAAA**GCTC**AAACAG--GCCCT-----CACCTCTAATTAC  
 Atja --TGA**A****G****A****A**-**GCG**TTAAA**GCTC**ATACAACCTA--TAAA----T--CCGATTATACT  
 lido --TGA**A****G****A****A**-**GCG**TTAAA**GCTC**ATACAAT---TTATTA----AT-CCAATTATTCT  
 Auja A--GT**A****G****A****A**-**GCG**TTAAA**GCTC**AGACAAC-CTCCTCTA-----A-CCTATTATCCC  
 Chag A--GCA**AAAA**-**GCG**TTAAA**GCTT**ATATGGACATCATTAG----CCCCCTAATTAT  
 Hami C--ACA**AAAA**-**GCG**TTAAA**GCTT**AAATAAG----ACCTA----C-CCTATTATCCC  
 Saun C--AGA**AATA**-**GCG**TTAAA**GCTT**AAA--TA--AAAACCC-----CCCCATTATCCC  
 Nema A--AA**G****A****A**-**GCG**TTAAA**GCTC**AGACAC--TCCATACA-----C-CCCTAATACC  
 Disp --TAA**G****A****A**-**GCG**TTAAA**GCTC**ATACAATTT---CG-----ACCCT--TAATACC  
 Myaf A--GA**A****G****A****A**-**GCG**TTACA**GCTC**C-TATAAACCCAG-C-----CCCCTAATACC  
 Lagu ---CCC**G****A****A**-**GCG**TTAAA**GCTC**AAGTAGT----CCTA-----AACCAC-TAATTCC  
 Trtr A--TC**A****G****A****A**-**GCG**TTAAA**GCTC**AAGC-CACA---TCA-----ACCCTATTATTAG  
 Zucr --TCCT**G****A****T****A**-**GCG**TTAAA**GCTC**AAG----CTGTATCT---ACCCTATT---ATTCT  
 Pxja G--TT**A****G****A****A**-**GCG**TTAAA**GCTC**AAACACCTA---TTATT----AACCTTTTATTAT  
 Pxlo G--TT**A****G****A****A**-**GCG**TTAAA**GCTC**AAAC--ACCTATTATT----AACCTTTTATTAT  
 Pctr --AGC**A****G****A****A**-**GCG**TTAAA**GCTC**AATTA---ATG--ATC---CAACCAGTTATACT  
 Apsa --AACA**G****A****A**-**GCG**TTATA**GCTC**AACTAAAATC---GCC----CCATTT---ATAAC  
 Cabe T--GT**A****G****A****T****A**-**GCG**TTAAA**GCTC**AAGCACAT-----TTA-----ACCCACCCATGCC  
 Bzze A--AG**A****G****A****A**-**GCG**TTAAA**GCTC**AAGTATGAA---CTAA-----ACCTATT-ATTCT  
 Siim --GAG**A****G****A****A**-**GCG**TTAAA**GCTC**GAGTAC-TA---ACTA-----GCCAATT-ATACT  
 Ctru C--GT**A****G****A****A**-**GCG**TTAAA**GCTC**AAATA----TAAACAA-----AACCCATTATCCT  
 Dpbr --TGA**A****AAAA**-**GCG**TTAAA**GCTT**AAATATAATCA--A-----ACCCATTA-TCCC  
 Caki --TAA**A****G****A****A**-**GCG**TTAAA**GCTC**TAACTATCTAGC-AC-----ACCCT--TTATACT  
 Phja ---ATA**G****A****A**-**GCG**TTAAA**GCTC**AAATTAA--ATATCA-----TCTTG--ATATCCC  
 Brsp C-CCTC**G****A****A**-**GCG**TTAAA**GCTC**AAATT-AA--ATCAAT-----CCTCACATCCCG  
 Gamo A--TC**A****G****A****A**-**GCG**TTAAA**GCTC**AAATTAGCCTAT---A-----TCCTCATA--TAC  
 Lolo A--CT**A****G****A****A**-**GCG**TTAAA**GCTC**AAAT---TAGACATC-----ATCCTCATATACT  
 Batr C--CAT**G****A****A**-**ACG**TCATA**GTTC**-----TA-AAAATCCT-----GCTACCAATCTC  
 Prmy --AAA**G****A****A**-**GCG**TTAAA**GCTC**AAA-----TACCC--ACAATTAA-ATTCC  
 Loli T--ATA**G****A****A**-**GCG**TTAAA**GCTC**AAGTATAG--TACTAC-----CCATACATCCCG  
 Loam G--ACA**G****A****A**-**GCG**TTAAA**GCTC**AAATA---C-GGAGCA-----CCCTATATATTCT  
 Chab --TACA**G****A****A**-**GCG**TTAAA**GCTC**GAGT--ATAACTA-----ACCCTATAAAACT  
 Chto --TACA**G****A****A****A****G****C****G**TTAAA**GCTC**GAGTATA-ACTAA-C-----CCTAT--AAATACT  
 Majo --ATT**A****G****A****A**-**GCG**TTAAA**GCTC**GGACATACCTAA-AC-----ACCTA--TTATAG  
 Hlst --AGT**A****G****A****A**-**GCG**TTAAA**GCTC**AA--ATG--TAAAAA---ATCTAATT-ATTAC  
 Clpe --CTC**A****G****A****A**-**GCG**TTACA**GCTC**GAGTA--CAGC--CCC---AGCCT---CATCCC  
 Mlmr --CAT**G****A****A**-**GCG**TCTCA**GCTC**AAGTATAACCCCC--CCCCCCCCCAATACT  
 Cr cr A--CCA**G****A****A**-**GCG**TTAAA**GCTC**TAACAT----TCCTTC-----CTCCCTAATACT  
 Muce A--CCA**G****A****A**-**GCG**TCAA**GCTC**TAACA----TTCTTC-----CTCCCT-AATACT  
 Bege A--GAG**AAAA**-**GCG**TTATA**GCTC**AAGTATAG-ACA-----CAACTAATAATTCT  
 Mela A--ATA**AAAA**-**GCG**TTAAA**GCTT**GAACATT-GCACTCAA-----ACCCCTAATTCC  
 Hats A-AACA**G****A****A**-**GCG**TTAAA**GCTC**AAATATACC---ACA-----GCCCTA-ATCCT  
 Or la --AATA**AATA**-**GCG**TTAAA**GCTT**AAGCATAAAAATCA---CCTACA-----ATTCT

Cosa --AGAA**GAAA**-**GCG**TTACA**GCTC**AAACATAACT---C-----CAACCAATAACT  
Exsp --AAAA**GAAA**-**GCG**TTATA**GCTC**GAACATT--A---TTA----CTTCCTTTAACT  
Depa G--AGA**GAAA**-**GCG**TCAAA**GCTC**AAACAT--AAAGAAAG-----CCCTTAATAA--T  
Rima --AAAA**GAAA**-**GCG**TTAAA**GCTC**AAAATCTCAAACCCC-----TT-----AAATCCC  
Fuol --GAGA**GATA**-**GCG**TTAAA**GCTC**AAACATAACTT--AA-----ACTAA--TTATATC  
Gmaf ---TAA**GAAA**-**GCG**TTAAA**GCTC**AGACACACCCCTTCC-----CACCTC-AAATCCC  
Xeei --AAAA**AATA**-**GCG**TTAAA**GCTT**AAACATACCC--CTCC----CCGCTATTATTTT  
Pros --AACA**GAAA**-**GCG**TTAAA**GCTC**AAGCATCCGCCA-C-----CCT-C--AAATCCC  
Scmi --CACA**GAAA**-**GCG**TTAAA**GCTC**AGACAC---TCCTCCC----CCACCTTAAATCCC  
Rolo --AATA**GAAA**-**GCG**TTAAA**GCTC**AGACACAACCTC-CA-----ACCCC--CGATACT  
Cere A--AAA**GATA**-**GCG**TTAAA**GCTC**AAGCACATG---CCCG-----ACCTAAT-ATACT  
Daga --TGAA**GAAA**-**GCG**TTAAA**GCTC**AAGCAC-GTATTACA---GCCCCCT----ATAAT  
Anco A--GCA**GAAA**-**GCG**TTAAA**GCTC**AAACATACTTATATCC-----CCTT---ATCCT  
Dmve C--ATA**GAAA**-**GCG**TTAAA**GCTC**AAACATACC-TGCCCC-----CCCCCAATTCT  
Dmar --AGCA**GAAA**-**GCG**TTAAA**GCTC**AGACATA--CTCACAC---CTCCCCAA-TCCC  
Anka --AACC**GAAA**-**GCG**TTAAA**GCTC**AAACA----TAATGAC----TCACCCCCAATTCT  
Moja --AATA**GAAA**-**GCG**TTAAA**GCTC**AAACATAATCA--CCT----A--CCCCTTATACC  
Hoja --AACA**GAAA**-**GCG**TTAAA**GCTC**AAACATACTTA--AT-----AACCCCTTATACT  
Bede A--ACA**GAAA**-**GCG**TTAAA**GCTC**AGGCA--CATCTACC----AACCCCATATTCT  
Besp --AACA**GAAA**-**GCG**TTAAA**GCTC**AGACACAC---CTAC----CAACCCCATATTCT  
Mysp --AATA**GAAA**-**GCG**TTAAA**GCTC**GGACATATCT--ACCA----CAACCTTATATACT  
Osja A--ACA**GAAA**-**GCG**TTAAA**GCTC**AGAC---ATAGCCCT-----TAAATCAACCTT  
Sgro --AATA**GAAA**-**GCG**TTAAA**GCTC**AGAC--ATAGCTCTTACTTCAACCCCCAGATATT  
Pzpa A--ACA**GAAA**-**GCG**TCAAA**GCTA**AAA--TAAATAAATCA-----TCCCTATCTAAC  
Zeja A--AGA**AAAA**-**GCG**TTAAA**GCTC**AAATA----AAAATA-----CTCCTTTTATTAC  
Zne A--TTA**TAAA**-**GCG**TTAAA**GCTA**AAAGTAAA--CTAAA-----TTCCTTTTATACT  
Zefa --GTCA**TAAA**-**GCG**TTAAA**GCTA**GAATAAAATA---AAC----ATTCCTTTTATAAT  
Acni --AATA**GAAA**-**GCG**TTAAA**GCTA**AAATAAA--TCTAACT----ACTCCTTTTATAAT  
Ncrh --AATA**GAAA**-**GCG**TTAAA**GCTA**AAATAAACCTATTAC-----TCCTT--TTATAAT  
Agca C--ATA**GAAA**-**GCG**TTAAA**GCTC**AAACATCCCTACCGTC-----CCCTCCCTATCCC  
Hydy --TGAA**GAAA**-**GCG**TCA**GCTC**AAAGTACT--CTACTTA----AACCCCTTATTCT  
Gsac C--TAA**GAAA**-**GCG**TCAAA**GCTC**AAAGTACC-CTACTTAA-----ATCCTCTTATCCT  
Pevo --CGAA**GAAA**-**GCG**TTAAA**GCTC**GTGCAT---CTAAC-----TGCCAT-CAATACT  
Hiku --GATA**GAAA**-**GCG**TTAAA**GCTC**AAAGCAC---TA--TTT----AACTTTTAAATTCA  
Inpa C--CCA**GACA**-**GCG**TTACA**GCTC**AAAGT--GTT---ATCAC----AACCCCGATCCC  
Auch T--AA**GAAA**-**GCG**TTGA**GCTC**AGATC---GGCAAATA-----TGCTAAAATACG  
Fico --AGTA**GAAA**-**GCG**TTAAA**GCTC**AAAGCATTCCC---TTC----GCCTCT--AATCAA  
MacS T--ATA**GAAA**-**GCG**TTAAA**GCTC**AGACATAAA-----CCC----ATCCTTTTATTCC  
Moal T--ATA**GAAA**-**GCG**TCAAA**GCTC**AAATACCCCT---TC-----CACCCCTTATTAC  
Syma A--ACA**GAAA**-**GCG**TCAAA**GCTC**GTATAA--CACAATCA-----ACCTATTATCCT  
Mafr --AATA**GAAA**-**GCG**TTAAA**GCTC**AGACA---TAA--CTT----TCTCCTTATCCT  
Dcpe --TAGT**AAAA**-**GCG**TTCAA**GCTT**AAACTCA---CCCTT-----CGCTTA-TAATCCG  
Dcti --TAGT**AAAA**-**GCG**TCCA**GCTT**AAACTCATCCCT--A-----ACTTA--TAATAAG  
Hehi A--ATA**GAAA**-**GCG**TTATA**GCTC**AAATAC--ATCACTAC-----CCCTCTCTATCCT  
Stam T--ACA**GAAA**-**GCG**TTAAA**GCTC**AGACATATAGTAAAC-----CCTACTTATAAT  
Hogi --AATA**GAAA**-**GCG**TTACA**GCTC**GAGTA-----TTAATT----ACTCCTTTTATACT  
Erzo T--ATA**GAAA**-**GCG**TTAAA**GCTC**AGATATAAACCT--A-----TCCTTCTTATCCT  
Hxot C--TTA**GAAA**-**GCG**TTAAA**GCTC**AGACATGCGACC---A-----TACTTCTTATCCT  
Core --CTTA**GAAA**-**GCG**TTAAA**GCTC**GAACATATACCCGCC-----CCTTC--TTATTCT  
Apve --CTTA**GAAA**-**GCG**TTAAA**GCTC**TAGCATATTCCCAAC-----CCTTCTTATTCT  
Latj C--ATA**GAAA**-**GCG**TTAAA**GCTC**AGACATA---CCCTTT----CGCCCCATATTCC  
Laja --TCTA**GAAA**-**GCG**TTAAA**GCTC**AAACATACCCCC-TA-----TCCTA--TTATCCC

Syja --TTTAA**GAAA**-**GCGTTAAA****GCTC**GAAC-----ACACTCT----TTTCCTCTTATCCC  
 Epme A--TCA**AAA**-**GCGTTAAA****GCTC**AGACACCTAATCCCATA----AGCCCCAAGTCCC  
 Grse C--ATA**GAAA**-**GCGTTACA****GCTC**AAACA--CTCTTCTA-----GCCCTAAATCCC  
 Clja --TAAA**GAAA**-**GCGTTAAA****GCTC**AAATTAATAAACTA-----CCCCT--CTATAAC  
 Ogcy --TAAG**GAAA**-**GCGTTAAA****GCTC**AGACGACCAAACCCC-----CACCCAAAAATTC  
 Plna --CTAA**GAAA**-**GCGTTAAA****GCTC**GAATATATAC--CACC-----CCTTAAATCCC  
 Lema --CTTA**GAAA**-**GCGTTAAA****GCTC**AGACATCACACTA-----AGCTCTCTATTCT  
 Etzo --CGTA**GAAA**-**GCGTTAAA****GCTC**AAATATTCAACT--A-----CCCC--TTATTTG  
 Apse --AGCA**GAAA**-**GCGTTAAA****GCTC**AAACACC----TCCC-----CGCC--CTATTAT  
 Epde T--ATA**GAAA**-**GCGTTAAA****GCTC**AGACATATC-ACTTAC-----CCTTTCA-TCCT  
 Slja --TACG**AAA**-**GCGTTAAA****GCTT**AAACATGATAG--CCC-----CCTAAAATAAC  
 Bsja --TACA**GAAA**-**GCGTTAAA****GCTC**GGGCATACTAC-CCGC----CTCCTCCCTATATT  
 Ecna A--ATA**GAAA**-**GCGTTATA****GCTC**AGACATAAA--ATTCTA----AACCTTAAATCAA  
 Cohi A--A-AG**AAA**-**GCGTTAAA****GCTC**AGATAC--ACAAAA-----ACTATTTATTTA  
 Caar --ACA**GAAA**-**GCGTTAAA****GCTC**AAACGTCCCC--AAC----CTCCCTATA-TCCT  
 Came A--ACA**GAAA**-**GCGTTAAA****GCTC**AGACATA-ATACTCCC-----TCCCTATATCCT  
 Mema T--ATA**GAAA**-**GCGTTACA****GCTC**AAAGCATTTC--CCAC-----GCCATT-ATACC  
 Lenu --AAA**GAAA**-**GCGTTATA****GCTC**AAC-ACCCCTT--T-----CCCACAAATTAC  
 Brja --CATA**GAAA**-**GCGTTAAA****GCTC**AAGCA--TTAA--ACC----TGCCACCTATTCA  
 Plma C--ATA**GAAA**-**GCGTTAAA****GCTC**AAG--CATTAAACCTC-----CCCAAATATTTA  
 Emst --TATA**GAAA**-**GCGTTAAA****GCTC**AGACATA--TCACCTA----CCCCTCCCATCCT  
 Ptti --TATA**GAAA**-**GCGTTAAA****GCTC**AAACATAACC--CCA----CCCCTCCCATTCT  
 Losu --TATA**AAA**-**GCGTTAAA****GCTT**AAACA--TCAA--CCC----AACCTAATTATTCC  
 Geoy C--TAG**AAA**-**GCGTTATA****GCTC**AGAC---ATCCTTCT-----TACCTATAATCCC  
 Dipi C--CCA**GAAA**-**GCGTTAAA****GCTC**AAACAT--ACAACCAC-----CCCTCCCTATCCT  
 Pama T--TCA**GAAA**-**GCGTTAAA****GCTC**AGGTGCACC--CAACC----TTCCGTGATCCC  
 Leob --GTTA**GAAA**-**GCGTTAAA****GCTC**CAATATATTC---TCA---ACTCCTTAGATCCC  
 Neba T--AAT**GATA**-**GCGTTACA****GCTC**AAATATGCCCCT---C----CCTTAAAATTAG  
 Pdpi --CAC**GAAA**-**GCGTTAA****GCTC**GTACAAA---CCCCA-----CTCCTT-TAATTCC  
 Nimi T--ATA**GAA**-**GCGTTAAA****GCTC**AAATAT---AATTACC-----ACCCCTAATCCT  
 Uptr --ATT**GAAA**-**GCGTTAAA****CCTC**GGACATA--CCGACA-----CACCTA-TTATCCG  
 Pesc --CAC**GAAA**-**GCGTTAAA****GCTC**AGACATCCTAC-CAA---CCCCTATT---ATCCC  
 Baar A--ACA**GAAA**-**GCGTTAAA****GCTC**AGACATACCCCTACCC-----TCTC---ATCCC  
 Moar T--ACA**GAAA**-**GCGTTAAA****GCTC**AGACATACTATTACCC---CTCCTT---ATCCC  
 Toja --TAAA**GAAA**-**GCGTTAAA****GCTC**GAAC--ATAACTC-----CCTCCCCAATACT  
 Chau C--ATA**GAAA**-**GCGTTAAA****GCTC**AGACTAATT---ACGCC---GCCTCATAATTCC  
 Chse --TATA**GAAA**-**GCGTTAAA****GCTC**AGACATA---CCTCT---TCTCCCCCTATTCC  
 Enar --CATA**GAAA**-**GCGTTAAA****GCTC**AGAC-----ATATCAA---ATCCCTCTTATCCT  
 Hpty --TATA**GAAA**-**GCGTTAAA****GCTC**AGACATACCGC-TA---CCCCTCTC---ATCCT  
 Nana A--ATA**GAAA**-**GCGTTAAA****GCTC**AAAGTACTAATT-TA---CAAGCCTATT-ATCCT  
 Mcst ---ATA**GAAA**-**GCGTTAAA****GCTC**AGACATA--CTACCCT---ACCCTATT-ATCCC  
 Rhox --AATA**GAAA**-**GCGTTAAA****GCTC**AGACATACCC---CC---TATCCTTTTATCCT  
 Opfa G--ACA**GAAA**-**GCGTTAAA****GCTC**GGACATACC---ACAC---ACCCTCTAATCCT  
 Paar A--ATA**GAAA**-**GCGTTAAA****GCTC**AAAT--TTTCCCCTC-----ACTTCTTATT-CT  
 Gozo C--ATA**GAAA**-**GCGTCAA****GCTC**CAACATA-----CCCC---TACCTCACATCCC  
 Ackr ---CA**GAAA**-**GCGTTACA****GCTC**AGATACCATTTTT-A-----ATCAC--ATATCCC  
 Elev T--ATA**GAAA**-**GCGTTACA****GCTC**CTACAC--AGTCCTAA-----T-CCTACGATCCT  
 Trdu --ACCA**GAAA**-**GCGTTAAA****GCTC**GAGCATT---ACCT-----AGCCAA-CC-TTCT  
 Amoc T--ACG**GAAA**-**GCGTTAA****GCTC**AAAGACTTAC---AACAC---C-CCCAAATACC  
 Hame --AGTA**AAA**-**GCGTTACA****GCTT**AAATTTCAA---ATT---TGACCTTAGATACC  
 Chso T--AAT**GAAA**-**GCGTTACA****GCTC**AAACACCCTCCACCAC-----CCGCAGAT--CCC  
 Lyto C--TCA**GAAA**-**GCGTTAAA****GCTC**AAATAT--AATACGGA-----CCTTCTTATTCT



Encr --CTTA**GAAA**-**GCG**TTAAA**GCTC**GGATATACCA---TCA----ACCCTTCTTATTCT  
 Bvar -CTAAA**GAAA**-**GCG**TCTTA**GCTC**-AGAATAACCTTGCCC----CGCTCTAAATGCC  
 Noco C-TAAA**GAAA**-**GCG**TCTAA**GCTC**GAAACAAT-CTTGCCC----CTCCCCCAATCCT  
 Chsp --AACA**AACA**-**GCG**TTAAA**GCTT**AAATATAAATG---T-----CCCC--CAATCCT  
 Arja --CGTA**GAAA**-**GCG**TTAAA**GCTC**AGGTATGCTA--CTTA----AACCTTCTTATTTT  
 Pase T-GTAA**GAAA**-**GCG**TTAAA**GCTC**AAACATGCC---TACC----CTCCCCAATCTC  
 Trel T-AAGA**GAAA**-**GCG**TTACA**GCTC**AGTTACACCTG--CCC----CTTCCCCCTATTAG  
 Lifa --AAAT**GAAA**-**GCG**TCAAA**GCTC**AAGCATAAGA----A-----TAGCTCTAATTCC  
 Acur C--CA**GAAA**-**GCG**TTTAA**GCTC**GTTCAATTAT---ACCTC----A**ACTCG**TAATTTCC  
 Ampe --TACA**GAAA**-**GCG**TTAAA**GCTC**AGATATACTAAATAA---CCCTCCCT---ATCCT  
 Urja --CCCA**GAGG**-**GCG**TTAAA**GCTC**AAACAC-----CTCCC----CGCCCCATATTCT  
 Enet A--TCA**GAAA**-**GCG**TTAAA**GCTC**AAAGTG----TTCCTAG-----CGCTTGGATACT  
 Ptbr T--AAA**AAAA**-**GCG**TTAAA**GCTT**AAGT----ATTAATTC-----AACCTATAATTCC  
 Safa --AACA**AAAA**-**GCG**TTAAA**GCTT**GAGTACCCCTA--A-----CGCCAATAATTTT  
 Icae --TATA**GAAA**-**GCG**TTAAA**GCTC**AAGCATTAAACCTCA---CCCATAT---ATTCA  
 Asmi --CTTC**AAAA**-**GCG**TTAAA**GCTC**AAGCA-AATATTA-----CACCTATAATTTA  
 Foal ----TA**GAAA**-**GCG**TTACA**GCTC**TTATATAATTTTAAA-----CCCTTA---ATACT  
 Drze --TAAA**GAAA**-**GCG**TCATA**GCTC**GCATACATAGAATTA--AGCCCTTT---ATACC  
 Rhas --AATA**GAAA**-**GCG**TTAAA**GCTC**AAACATATCCCTCTG----CCCCT---TATCCC  
 Elac T--AAA**GAAA**-**GCG**TTAAA**GCTT**AAATGTCT-GCCACCC----CCCCCCCCATCAC  
 Kugu --AAA**GAAA**-**GCG**TTAAA**GCTC**AAAC-----AGATACA---CCACTATTTCTCCC  
 Plor --CAAA**GAAA**-**GCG**TTAAA**GCTC**AGACATACCTCC-----GCCCGATATCCC  
 Sgun T--GT**GAAA**-**GCG**TTAAA**GCTC**AAACAC--ATACCTC-----CCCTAT-TATCCT  
 Zaco T--ACA**GAAA**-**GCG**TTAAA**GCTC**AGACATA-CCCTACC-----CCCT-TAAATCCT  
 Zbfl --CACA**GAAA**-**GCG**TTAAA**GCTC**AGACATAGCCATACC----ACCTA--TAATTCT  
 Spba A--ATA**GAAA**-**GCG**TTAAA**GCTC**AAAC--ATACAATTA-----ATTCTATAATACC  
 Game A--ATA**GAAA**-**GCG**TTAAA**GCTC**AAGCATTAA--ACCTC----ACCCATATATTTA  
 Thth T--ACA**GAAA**-**GCG**TTAAA**GCTC**AAGCA--TTACACCT-----TCCCACATATTCA  
 Xigl C--GCA**GAAA**-**GCG**TTAAA**GCTC**GGACATACC-TTACCT-----CCCTATA-TACT  
 Hyja A--ACA**GAAA**-**GCG**TTCAA**GCTC**AAGCAT-TTAACTTA-----CCCATATATCTC  
 Psan --AACA**GAAA**-**GCG**TTCAA**GCTC**AAGCATC--TAACCTT----ACCCATAT-ATTCC  
 Cupa --TACA**GAAA**-**GCG**TTAAA**GCTC**AAGCATTAAACCTT----ACCCAT-ATATTCA  
 Mpch ---CAA**GAAA**-**GCG**TTAAA**GCTC**AGACACA--CCCCCTC----A-TCCATTAATTCA  
 Char A--ACA**GAAA**-**GCG**TTAAA**GCTC**AGACATATTAATAACC-----CCTATA-ATCCG  
 Pser --AATA**GAAA**-**GCG**TTCAA**GCTC**AGACATCCCC--TTCC----CCA---AAAATCCC  
 Prol --AACA**GAAA**-**GCG**TTAAA**GCTC**AGACATAGACACCTC---CATAT-----ATACC  
 Plbi --AACA**GAAA**-**GCG**TTAAA**GCTC**AGACAT--GAAGCCC-----TCCC--GTTATACC  
 Calu --AGCA**GAAA**-**GCG**TTAAA**GCTC**AAGCG--CAA---CAT----AACCATAAATCTC  
 Papa C-TTAC**AAAA**-**GCG**TAGTA**GCTC**AAACAACAACCTACCA----AAACCATAAATTA  
 Suf r A--ACT**GAAA**-**GCG**TTAAA**GCTC**GAACATTT-TAC-----TTCCCC-CAATCCC  
 Stci --TAAA**GAAA**-**GCG**TTAAA**GCTC**AAATAT-----TGCTC----TTCCATAAATTC  
 Taru ----AA**GAAA**-**GCG**TTAAA**GCTC**TAGCAC----ATCCCT-----GCCACAAATACC  
 Rala --AATA**GAAA**-**GCG**TTAAA**GCTC**AAACATTATTA--A-----ACCTAATTATCCC

\*\*\* \*

|      |                           | 20'           | 15'            | 24                                |
|------|---------------------------|---------------|----------------|-----------------------------------|
| Scca | --GATATT-----TATTCAAAAAC  | <b>CCCCCT</b> | TAAC---C--CTAT | <b>TGGGT</b> TAT <b>TTTAT</b> ATA |
| Muma | --GATATT-----TA-CTCATAAC  | <b>CCCCCT</b> | TT--ATCC---TAT | <b>TGGGT</b> TAT <b>TTTAT</b> A-A |
| Erca | --GATAAA-----ACCT-CTAAAT  | <b>CCCCCT</b> | ATA--CA----TAT | <b>TGAGT</b> TAC <b>TCTAT</b> -TA |
| Pose | --GATAAA-----CCC-TCTAAAT  | <b>CCCCCT</b> | ATAAA-----TAT  | <b>CAAGT</b> TAC <b>TCTAT</b> --T |
| Actr | --GATAAA-----ACAATCACAAT  | <b>CCCCCT</b> | A-AACC-----TAC | <b>AGAGC</b> CCG <b>TCTAT</b> AT- |
| Scal | --GATAAA-----ACGATCACAAT  | <b>CCCCCT</b> | AA---A-C--CTAC | <b>AGAGC</b> CGC <b>TCTAT</b> ACA |
| Posp | --GATAAA-----ACAATCACAAT  | <b>CCCCCT</b> | AAC---T----TAC | <b>TGAGC</b> TAC <b>TCTAT</b> ACA |
| Atsp | --GACAAA-----CACATCTGACT  | <b>CCTCC</b>  | TAA--TAG---TAC | <b>TAAGC</b> TAC <b>TCTAT</b> TT- |
| Leoc | --GACAAA-----TACATCTGACT  | <b>CCTCC</b>  | TAAT--AC---TAC | <b>TAAGC</b> TAC <b>TCTAT</b> T-- |
| Amca | --GAT-AA-----CCAATCTCACT  | <b>CCCCCT</b> | CTAAC-----TAC  | <b>TAAGC</b> TGT <b>TCTAT</b> A-- |
| Osbi | --GACAAT-----TA-ATCTCACC  | <b>CCTCC</b>  | AACAT-----TAT  | <b>CAAGC</b> TAT <b>TCTAT</b> ACT |
| Pabu | --AATAAA-----AATCTCCAACC  | <b>CCACT</b>  | AAA---AA---TAT | <b>TAAGC</b> CGC <b>CCTAT</b> G-T |
| Hial | --GATAAT-----AA-ATCCTACT  | <b>CCTCT</b>  | AAAA--G----TAC | <b>TAAGC</b> CAC <b>TCTAT</b> AC- |
| Elha | --GATACC-----CGGTCCA-ACT  | <b>CCCCCT</b> | AAG---AA---TAC | <b>TAAGC</b> CAT <b>TCTAT</b> GC- |
| Mlcy | --GATAAA-----ACATCCCCT    | <b>CCCCCT</b> | AACA-----ACAC  | <b>TAAGC</b> CAT <b>TCTAT</b> GC- |
| Algl | --GATTAT-----TTT-TCCTAGT  | <b>CCCCCT</b> | AAA---CA---TAC | <b>TAAGC</b> TAT <b>TCTAT</b> GT- |
| Ptgi | --GATAAC-----CCAT-CCTACT  | <b>CCCCCT</b> | AAAA--A----TAC | <b>TAAGC</b> CAT <b>TCTAT</b> GCC |
| Alaf | --GATAAA-----A-AATCATATT  | <b>CCCCCT</b> | TAA---TA---TAC | <b>TAAGC</b> CGT <b>TCTAT</b> GCT |
| Nock | --GACAAT-----AAA-TCCCAAT  | <b>CCCCCT</b> | AATT--T----TAC | <b>TAAGC</b> CAT <b>TCTAT</b> GC- |
| Anja | --GACAAT-----ACACTCCCCAC  | <b>CCCCCT</b> | AAAA--A----TAT | <b>TAAGC</b> TAT <b>CCTAT</b> GCA |
| Gyki | --AATAAC-----TAAGCCACACC  | <b>CCCCCA</b> | AAA--A----ATAC | <b>TGAGC</b> CCC <b>CCCAT</b> GA- |
| Syka | --GATAAA-----TTTCTCCCCAC  | <b>CCCCCT</b> | A-AAAA-----TAT | <b>TAAGC</b> CAT <b>CCTAT</b> G-C |
| Opma | --GATAAC-----ATAATCCTAAT  | <b>CCCCCT</b> | ATA--A---ATAT  | <b>TAAGC</b> CAC <b>TCTAT</b> GTA |
| Comy | --AATAAC-----C-ACTCCTAAT  | <b>TTCCCT</b> | AATAA-----TAT  | <b>TAAGC</b> TAC <b>CCTAT</b> TT- |
| Sasp | --GATTTT-----TAACCTCAAAC  | <b>CCCCCA</b> | AGTAA-----TAT  | <b>TAGGC</b> CTC <b>ACTAT</b> ACT |
| Eupe | --GATAAA-----TTCTCTTTA-T  | <b>CCCCCA</b> | AAAAA-----TAT  | <b>TAAGC</b> TAC <b>TCCAT</b> TT- |
| Enja | --ATCTTA-----AT--ATCTGCT  | <b>CCCCCT</b> | AAACCT-----TAT | <b>TGGGC</b> CTC <b>TCCAT</b> GCA |
| Same | --ATTA AAA-----A-TCTCAAAG | <b>CCCCCT</b> | AA---TAT---TAT | <b>TGGGC</b> CGC <b>CCTAT</b> G-C |
| Chch | --GCTATA-----CCACCCCCAC   | <b>CCCCCT</b> | A---ATTT---TAC | <b>CGGGC</b> CAT <b>TTTAT</b> GCC |
| Grgr | --GATA-C-----CACCCCCCACC  | <b>CCCCCT</b> | AGTT--T----TAC | <b>TGGGC</b> CGC <b>CCCAT</b> GCC |
| Caau | --GAT-AA-----TATATCTCACT  | <b>CCCCCT</b> | A--AATAC---TAT | <b>TAGGC</b> CAA <b>CCCAT</b> GCC |
| Cyca | --GATAAA-----A-AATCTTACT  | <b>CCCCCT</b> | AAGT--AC---TAT | <b>TAGGC</b> CAA <b>CCCAT</b> GCC |
| Dare | --GACAAT-----AATATCTTACT  | <b>TCCCT</b>  | AAAA-----ATAC  | <b>CAGAC</b> TAA <b>TCCAT</b> AC- |
| Cost | --AATAAA-----ATA-TCCCCT   | <b>CCCCCT</b> | AA-A--CG---TAT | <b>TAGGC</b> CAC <b>TCCAT</b> GAT |
| Leec | --GATAA-----ACAACCCCCT    | <b>CCCCCT</b> | TA-T--AT---TAT | <b>TAGGC</b> CAT <b>TCCAT</b> GC- |
| CrIa | --GATAAA-----CAATCCCCT    | <b>CCCCCT</b> | AAAA--T----TAC | <b>CAGAC</b> TAT <b>TCCAT</b> GCC |
| Clmc | --GATACT-----CCCATCCTAAA  | <b>CCCCCT</b> | CCAA--AA---TAC | <b>TAGGC</b> CAC <b>TCCAT</b> GC- |
| Phin | --AG-CAT-----TACCTCTAATA  | <b>TCCCT</b>  | ACTT--A----TAT | <b>TAGGC</b> CTC <b>TCCAT</b> GAA |
| Icpu | --A-ATAT-----TTTATCTTAAA  | <b>CCCCCT</b> | AATC--A---TAT  | <b>TAGGC</b> CAA <b>TCCAT</b> GCC |
| Psto | --AATACA-----TT-ATCTAAAA  | <b>CCCCCT</b> | A-AC--C--TTAT  | <b>TAGGC</b> CAC <b>TCCAT</b> GCC |
| Cora | --AATACC-----CTAATCCAAAA  | <b>CCCCCT</b> | AAT--AT---TAT  | <b>TAGGC</b> CGC <b>TCCAT</b> GCC |
| Eisp | --GATAAC-----AA-ATCCAAAA  | <b>CCCCCT</b> | AA-C--CA---CAT | <b>TAGGC</b> CTC <b>TCCAT</b> GCC |
| Apal | --GATATT-----A-TATCTTAAA  | <b>CCCCCT</b> | A--ACCC---TAC  | <b>TAGGC</b> CCT <b>CCTAT</b> GCT |
| EsLu | --GATAGA-----CATCCCAA     | <b>CCCCCT</b> | AATAT-----TAT  | <b>TAAGC</b> CCT <b>TCCAT</b> TC- |
| Dape | --GATAAA-----CTAATCCTAA   | <b>CCCCCT</b> | AAAAA-----TAT  | <b>TAAGC</b> CCT <b>TCCAT</b> C-C |
| Glse | --GATAA-----A--CTCTCAA    | <b>CCCCCT</b> | TTTTTT-----TAT | <b>TAAGC</b> CAC <b>CCCAT</b> GCC |
| Naar | --GATACT-----T--ATTCTTAC  | <b>CCCCCT</b> | AATC-----TTAC  | <b>TAAGC</b> CGC <b>CCCAT</b> GCC |
| Baoc | --GATATT-----AATT-CTTAC   | <b>CCCCCT</b> | AATCT-----TAC  | <b>TAAGC</b> CGC <b>CCCAT</b> GCC |
| Opso | --GATAA-----ATG-CTCCCAC   | <b>CCCCCT</b> | AACTT-----TAC  | <b>TAAGC</b> CAC <b>CCCAT</b> GCC |
| Alte | --GATAAC-----CAACCCCAAC   | <b>CCCCCT</b> | AATAG-----TAT  | <b>TAGGC</b> CGC <b>CCTAT</b> GCC |
| Plap | --GATAGC-----C-ACCCCAAC   | <b>CCCCCT</b> | AA-TAT-----TAC | <b>TAGGC</b> CGC <b>CCTAT</b> GCC |

Plal --GAT--A-----ACCTTTCCTCCA**CCCC**AGTTT-----TAC**CGAAG**CAT**CCCAT**GCC  
 Sami --GATAAC-----C-TCTCCCCCA**CCCC**AATTT-----TAC**TAAAC**CGC**CCCAT**GCC  
 Rere --GATAGA-----GTTTTCTAC**CCCC**ACTAT-----TAC**TGAGC**CAT**CCCAG**GC-  
 Gama --GATAAA-----TAGTCTTAC**CCCC**AAGTT-----TAA**TAGAC**CGT**CCCAG**ATT  
 Onmy --GATAAG-----AAATCCCACC**CCCC**AACCG-----TAC**TAAGC**CGT**TCCAT**G-C  
 Sasa --GATAAA-----AAATCCTACC**CCCC**AACCG-----TAC**TAAGC**CGT**TCCAT**GCT  
 Cola --GATAAG-----AAATCCTAC**CCCC**AACCG-----TAC**TAAGC**CGT**TCCAT**GCC  
 Dita --GATAAA-----A-AGTCCCA**CCCC**TTCCAC-----CAC**CAAGC**CCC**CCTAT**GCA  
 Gogr --G-TTGT-----AGCCCCCAT**CCCC**AACCC-CCCCCAC**TAAGC**CAT**TTTAT**GCC  
 Chsl --GCCAG-----TAATTCTAA**CCCC**AACCAC-----TAC**TAAGC**CAC**CCCAT**GTT  
 Atja --GAT-AA-----AACATCTTAA**CCCC**ATA--AC--TAT**TAGAC**CAC**CCCAT**GCA  
 lido --GATAAA-----ACATCTTAA**CCCC**ATAAC-----TAT**TAGAC**CAT**CCCAT**GCA  
 Auja --GA-CAA-----AAAATCTTACA**CCCC**AACTAG-----TAC**TAGGC**CAC**TTTAT**GCC  
 Chag --GGTATA-----ATTTTCTTATT**CCCC**GCATTC-----TAC**TAGGC**CAT**TTTAT**G-C  
 Hami --GATAAA-----TTA--TCTTTT**CCCC**TAAAT-----TAT**TAGGC**CAT**TCCAT**G-C  
 Saun --GATAAT-----TAATCTTTT**CCCC**TGCAT-----TAA**TAGGC**TAT**CCCAT**GCC  
 Nema --GA-ACC-----AAACTCTAAACT**CCCC**CCCC-----TAC**CAGGC**CGT**TCCAT**GCA  
 Disp --GA-ACC-----AAGCTCCACACT**CCCC**CCC--A--CTAT**CAGAC**CCT**CCCAT**AAG  
 Myaf --GAACAC-----AACTCTTCAGT**CCCC**TTCCAC-----TAT**TAAAC**CCT**CCCAT**CA-  
 Lagu --AATCAA-----CCAGTCAAGCC**CCCC**CCTAA-----TAC**TAAGC**TAT**TCTAC**CCA  
 Trtr --GAACAC-----CCG-TTTTATT**CCCC**AATCC-----TAC**TAGAT**CAC**TCTAT**T--  
 Zucr --GATTAT-----ATGTTTTACT**CCCC**TAAC-----TTAC**TAGAT**CAC**TCTAT**TT-  
 Pxja --GTTATC-----ATA-TCTTCT**CCCC**TAAATA-----TAT**CAGGC**CGC**CTCAT**G--  
 Pxlo --GTTATC-----ATA-TCTTCT**CCCC**TAAATA-----TAT**CAGGC**CGC**CTCAT**GCA  
 Pctr --GATAGA-----A-AATCTTTAT**CCCC**A--CAAC-----TAC**CCGGC**CTC**CCCAG**GCA  
 Apsa --GACA-A-----CCAATCTTCAA**CCCC**AACAA-----TAT**CAGGC**CGC**CCTAT**GCC  
 Cabe --GATAGC-----TCAATCCCAAC**CCCC**AACCC-----TAC**CAGAC**CAT**TATGT**A-C  
 Bzze --GATAAT-----ACCATCTAAAC**CCCC**ACCTA-----TAC**AAGGC**CTT**CTCAT**A-C  
 Siim --GATAAC-----CCAATCTTACC**CCCC**GCCCC-----TAC**CAGGC**CTT**CTCAT**--T  
 Ctru --GACAAC-----CTCTTCTTAA**CCCC**TCACCC-----TAT**TGAGC**CCC**TCCAG**ATC  
 Dpbr --GACAAC-----TTAATCTTAA**CCCC**A-ACCCC--TAT**TGGGC**CCC**TCCAT**A-C  
 Caki --GATATA-----TATCTTTCCCC**CCCC**GCTACT-----TAA**TAGGC**TAT**CTTAT**GCC  
 Phja --GATAAA-----AAATCTCCCTC**CCCC**TA-ATC-----TAC**CAGGC**TGT**CTTAT**GCT  
 Brsp --AACCTC-----CCTCTCTTTTA**CCCC**AAAAA-----TAT**CAGAC**TAA**TTTAT**TT-  
 Gamo --TGATAT-----TACATCTCCCT**CCCC**CCCCT-----TAC**CAGGC**TGT**CTTAT**GCC  
 Lolo --GATATT-----ATA-TCTCCCT**CCCC**CT-CTC-----TAC**CAGGC**TGT**CTTAT**GCC  
 Batr --GATATC-----ACACACCAAAA**CCCC**AACCC-----CAT**TGAGC**CCC**ATCAC**ACT  
 Prmy --GATCCA-----TTAACTTAGT**CCCC**AACT-----TAT**TGGGC**CCT**ACTAT**CT-  
 Loli --AA-AAC-----TTAATCTGAAC**CCCC**AAAGAC-----TAC**CAGGC**AGC**CCTAT**TCA  
 Loam --GACAAC-----ATAATCTTAA**CCCC**AA-AAC-----TAC**CAGGA**AGC**CCTAT**GCG  
 Chab --ACAAT-----TATTTCTTATT**CCCC**G-TAC-----ATAC**CAGGC**CCT**CCCAT**GC-  
 Chto --ACAAT-----TATTTCTTATT**CCCC**GTACA-----TAC**CAGGC**CCT**CCCAT**GCA  
 Majo --GATAAT-----TACATCCCATC**CCCC**AAT--T--CTAC**CCGGC**CGC**CCCAT**ACC  
 Hlst --GATAAT-----C-AACTTACT**CCCC**AACCT-----TAC**CCGGC**CTC**TCCAT**GC-  
 Clpe --CCTAAT-----TTGATCTGATT**CCCC**C--AACA-----TAC**CAGGC**CTT**CCCAT**GCT  
 Mlmr --GACAAT-----TTAATCTTATT**CCCC**AAAT-----ATAC**CAGGC**CCT**TCCAT**GC-  
 Cr cr --GATAAC-----AAG-TCTTAGC**CCCC**AA-CCA-----TAT**CAAGC**CGC**TCCAT**CAA  
 Muce --GATAAC-----AAGT-CTTAGC**CCCC**AACCA-----TAT**CAAGC**CGC**TCCAT**CGA  
 Bege --GAT-AT-----TCTATCCTACT**CCCC**AACCC-----TAT**CAGGT**CCT**CCCAT**AT-  
 Mela --GATTTT-----AGCCTCCTACT**CCCC**TTCTCC-----TAT**CAGGT**TTT**CCCAT**ATC  
 Hats --GATTAT-----TTT-TCCAAC**CCCC**AACCC-----TAT**CAGGT**CTT**CCTAT**AAT  
 Or la --GATAAC-----TTAATTTGAAG**CCCC**TATA-----TTAA**CGAGC**TAT**TTTAT**AT-

Cosa --AATAAC-----TTACTCTTACA**CCTCT**TTAAAACC---TAC**CAGGC**CTT**TCTAT**AAA  
Exsp --GATCAA-----CCAATTTTACA**CCCCT**A--ATTC----TAA**CAGGC**CTT**TCTAT**TTT  
Depa --AGTAAA-----CAAATCTCAAAC**CCCTT**AAT--T-----TAT**CAGAA**TTT**TCCAC**TAA  
Rima --GCCTAT-----AAGATTTTATTC**CCCTT**GATT-----TAT**TAGGC**TAT**TTTAT**TAA  
Fuol --ACAAT-----AA-ATTATAAG**CCGCT**AGAA-T----TTAC**CAGGC**CCT**CCTAT**-TT  
Gmaf --GATAAC-----ATAATAATATT**CCCTC**GACAA-----TAC**CAGGC**CTT**TCTAT**CTT  
Xeei --GAT-AA-----CAAATTATATT**CCCCT**T--AAACC---TAC**CAGGC**CAT**TCTAT**TTT  
Pros --GACTGA-----CATATCTCAGC**CCCCT**AATCCT-----AC**TAGGC**CCT**CCCAT**GCC  
Scmi --GACAAA-----TATATCTTAA**CCCCT**AATCC-----TAT**TGGGC**CCT**CCCAT**GC-  
Rolo --GATAAA-----TAATCTAAAC**CCCCT**A-AA-C----CTAC**TAGGT**CCT**CTCAT**GCA  
Cere --GATTAT-----TTA-TCCCACC**CCCCT**AACCC-----CAC**TAGGA**CCT**CCTAT**G-C  
Daga --GATTAT-----ATTTCCAACC**CCCCT**GCCCC-----ACAC**CAGGA**CCT**CTCAT**GC-  
Anco --GATAAC-----CA-ATCTTAA**CCCCT**GACCCAG----TAT**TAGGC**CTC**CTCAT**GCA  
Dmve --GATAA-----ACAATCTAAAT**CCCCG**ACCCGA-----TAT**TAGGC**CCC**CTCAT**GCA  
Dmar --GATAAA-----AA-ATCTAAAT**CCCCA**ACCTGA----TAT**TAGGC**CCC**CTCAT**GC-  
Anka --GATAAC-----TA-ATCTAAA**CCCCT**ACCACA-----TAC**TAGGC**CTC**CTCAT**GC-  
Moja --GATAAA-----TA-ATCTAAAC**CCCCT**ACCCACAA--TAT**TAGGC**CTC**CTCAT**G-C  
Hoja --GATAAA-----TAAT-CTAAAC**CCCCT**A-ACCGAA--TAT**TAGGC**CTC**CTCAT**G-C  
Bede --GATTAA-----TCA-TCTAAAC**CCCCT**AA-TCC----TAT**TAGGC**CCT**CCCAT**GCA  
Besp --GATTAA-----TCA-TCTAAAC**CCCCT**AATCC-----TAC**TAGGC**CCT**CCCAT**GCA  
Mysp --GATAAA-----CAAATCTTAA**CCCCT**C--TCCT---TAC**CAGGC**CCA**TCCAT**GCA  
Osja --ATATAATGATACAAAATCTTAA**CCCCT**ACCAA-----TAC**CAGGC**CCA**TCCAT**GCA  
Sgro --GATACA-----TAAATCTTACA**CCCCT**AACCC-----GTAT**CAGGC**CTA**CCCAT**GC-  
Pzpa --GTTAAT-----A-AATCTTACA**CCCCT**AATAC-----TAT**TAGGC**CAT**CTCAT**GCC  
Zeja --GTTAAT-----A-AATTTTTTA**CCTCT**GATGTC----TAT**CAGGC**CTT**CTCAT**GCT  
Znne --G-TTAT-----TAAATCTCTCA**CCTCT**ATATT-----TAT**CAAAC**CAT**CTCAT**GC-  
Zefa --GTTACT-----AAA-TCTCCCA**CCTCT**GTAGT-----TAT**CAAAC**CAT**CTCAT**GCC  
Acni --GTTAAT-----GA-ATCTCCCA**CCTCT**GATATT----TAT**CAGAC**CAT**CTCAT**GC-  
Ncrh --GTTAAT-----GA-ATCTCCCA**CCTCT**GATA-T----TTAT**CAGGC**CAT**CTCAT**GCC  
Agca --GATAAT-----AAAATCTTATT**CCCCT**AATTT-----TAC**TAGGC**CAT**CCCAT**GAT  
Hydy --GATCAC-----CTAATCTTATC**CCCCT**AA-TTA----TAC**TGGGC**CTT**CCCAT**GC-  
Gzac --GATCAC-----CAAATCTTATC**CCCCT**ATATA-----TAC**TGGAC**CAT**CCCAT**GCC  
Pevo --AATAAA-----ACATCTCAAC**CCGTG**CAAAAAC---AG**CAGGC**TGT**TCTAT**TTA  
Hiku --GATA-A-----ATATTCTAAA**CCCTT**A--AAAT---CAT**CAGGC**CTT**TTCTAT**--A  
Inpa --AACATC-----TATACTTTAA**CCCCA**ACTC-----TAC**CAGGC**CCT**TCCAT**G-C  
Auch --GATAAT-----TCAATCTTAA**CCCCT**AT-CAC----TAT**CAAGC**CGT**TCAAT**ACA  
Fico --GATA-C-----AAAATCCTACT**CCCCT**AGATA-----TAT**TGGAC**CAT**CCCAT**TCC  
MacS --GATATA-----ATAATCTCAAC**CCCCT**AAATA-----TAC**CAGGC**CGT**TCCAC**A-C  
Moal --GATAGC-----CAA-TCTAACT**CCTCT**AATAC-----TAC**CAGGC**TTT**TTCTAT**GCC  
Syma --GATAAT-----TATACCCCA**CCTCT**AACCC-----TAC**CAGGT**CTT**CTCAT**GCA  
Maf r --AATAAC-----ACAATCTCAAT**CCCCT**AATAT-----TAC**CGGGC**TGC**TCCAT**GCA  
Dcpe --GATAAA-----TATATCTCAAC**CCCCC**AACATT-----AC**CGGGC**CGC**CCCAT**ACA  
Dct i --GATAAT-----AATATCTTAA**CCCCC**AGC-A----TTAC**CGGGC**CGC**CCCAT**ACA  
Hehi --GATCAT-----TAATTCTTACT**CCCCC**CTTTCC----TAC**CGGGC**CAT**CCCAT**GCA  
Stam --GATCAT-----AAAATCTTATA**CCCCT**AGTAC-----TAC**CAGGC**CGT**TCCAT**GCC  
Hogi --GATCAC-----TTAGTCTTAA**CCCCT**ACATT-----TAC**TGGGC**CGT**CCCAT**GC-  
Erzo --GATCAA-----ATAATCTTATC**CCCCT**ATACA-----TAC**TGAAC**CGC**CCCAT**GCC  
Hxot --GATCAC-----TTAATCTTACC**CCCCT**AACCG-----TAC**TGGAC**CAT**CCCAT**GCC  
Core --GATCCC-----CTTATCTTACC**CCCCT**AAACGT-----AC**TGGAC**CAT**CCCAT**GCC  
Apve --GATCAA-----CAAATCTTACC**CCCCT**AATCG-----TAC**TGGAC**TAT**CCCAT**GCC  
Lat j --GATAAC-----CCAATCTTAGC**CCCCT**A-ATCC----TAT**CAGGC**CGC**CCCAT**G-C  
Laja --GATAAC-----CCAATCTTAGC**CCCCT**AGT--C----TTAC**CAGGC**CGC**TCCAT**ACA

Syja --GATAAT-----TTAATCTAAAC**CCCCT**AACACT-----TAC**CAGGC**CCT**CCCAG**AC-  
 Epme --GACTAT-----CTTTTCTTACT**CCCCT**T-ATCC-----TAC**TGGGC**CGT**CCCAT**G-C  
 Grse --GACCAC-----CCAATCTTACT**CCCCT**AACCC-----TAC**CGGGC**CGT**TCCAT**GCA  
 Clja --GATAAC-----CCCTTCTAAAC**CCCCT**AGCTTT-----TAC**CGGAT**TTT**TCCAT**GCA  
 Ogcy --AGATGA-----AAATTCTCAA**CCTCT**AATCTT-----AT**CGGAC**TAC**TCTAT**TCC  
 Plna --GAC-A-----TAAACTCTTGCC**CCCCT**AATCC-----TAC**TAAGC**CGC**CCCAT**GCC  
 Lema --GATAAT-----T-TACCTCACC**CCCCT**AACTC-----TAC**CAGAC**CGA**CCCAT**GC-  
 Etzo --GATCAT-----AAAATCTTATC**CCCCT**AATTTT-----AC**CAGGC**CGT**CCCAT**GCA  
 Apse --CCGGAT--CACATTAATCTTACC**CCCCT**AAACAT-----AC**TGAGC**CTT**CCCAT**ACA  
 Epde --GATAAT-----TTAATCTTAAAC**CCCCT**AATCC-----TAC**CAGGC**CGT**CCCCT**GCA  
 Slja --GATAAT-----TTTATCTTAAAC**CCCCT**A--GACCC---TAC**CAGGC**CGC**TCCAT**A-C  
 Bsja --GATAAT-----TAAATCTTAA**CCCCT**ACTCC-----TAT**CAGGC**CGC**CCCAT**GCC  
 Ecna --GATAAC-----A-ATTCTCAAC**CCCCT**A-ACCA-----TAA**CAGGC**CCT**CCCAT**G-C  
 Cohi --GATAAG-----CCAATCTTAAAC**CCCCT**AGCCTT-----TAA**CAGGC**CGT**TCCAT**ACT  
 Caar --GATATC-----CTAATCTTAA**CCCCT**A-ATAT-----TAC**CGGGC**CTC**CCCAT**G-C  
 Came --GATACC-----ACAATCTTAA**CCCCT**AACA--T----TAC**CGAGC**CTC**CCCAT**GCA  
 Mema --GATAAC-----CCAATCCAAC**CCCCT**AACC--T---TAC**CAGGC**CAT**CCTAT**G-C  
 Lenu --GATAAT-----ACCATCTTTAT**CCCCT**A-ACAA-----TAA**AAGGC**CAT**TCCAC**C-C  
 Brja --GATAAC-----A-CCTCCAAC**CCCCT**A--ACAC---TAC**CAGGC**CTT**CTCAT**GCA  
 Plma --GATAAC-----CAAATCCCAGC**CCCCT**AACAT-----TAT**CAGGC**CGT**CTCAT**GCA  
 Emst --GATAAT-----TTTATCTTAGC**CCCCT**CATCAT-----AC**CAGGC**CGT**CCTAT**GC-  
 Ptti --GATAAT-----TTAATCTTAAAC**CCCCT**T--CAATC---TAC**CAGGC**CAT**CCCAT**GCA  
 Losu --GACATT-----ATAATCTTAAAC**CCCCT**C--GCAC---TAT**CAGGC**CTT**CCCAT**GCA  
 Geoy --ACCAAA-----ATAATCTTAA**CCCCT**AAATT-----TAT**TAGGC**CTT**CCCAT**GCC  
 Dipi --GATAAT-----CTTATCTTAAAC**CCCCT**AGCC-C-----TAC**CAGGC**CGT**TCCAT**GCA  
 Pama --GATAAT-----GCAATCTCATC**CCCCT**CTCAA-----TAT**CAGAC**TAT**CCACT**G--  
 Leob --GACAAT-----CCTATCTTACC**CCACT**AAACC-----TAC**CAGGC**CGC**TCTAT**ACA  
 Neba --GATAAA-----AATATCTTAA**CCCCT**TTAAT-----TAT**TAGGC**CAC**TCTAT**TAT  
 Pdpi --GATAAT-----TTTATCTTATC**CCCCT**AACCTT-----AT**CAGGC**CGC**CCCAT**GCC  
 Nimi --GACAAC-----CCCATCTTAAAC**CCCCT**AACCT-----TAC**CAGGC**CGT**CCCAT**GCA  
 Uptr --GATAAT-----TATATCCCATC**CCCCT**AATTCT-----AC**CGGGC**CGC**CCCAT**ACC  
 Pesc --GATAAA-----CTCCTCCAAC**CCCCT**AATT-----TTAC**CAGGC**CGT**CCCAT**AC-  
 Baar --GACAAT-----TTAATCTTAAAC**CCCCT**AGTAT-----TAC**CAGGC**CGT**TCCAT**ACA  
 Moar --GATAAG-----CCAATCTTATT**CCCCT**AATCC-----TAC**TAGGC**CGC**CCCAT**GCA  
 Toja --GATAAC-----CAAATCTCAAC**CCCCT**AGTC-----TTAT**TAGGC**CTT**CCTAT**GC-  
 Chau --GATAAT-----TTAATCTTAA**CCCCT**GACTT-----TAC**CAGGC**CTC**CCCAT**G-C  
 Chse --GATAAC-----CCAGTCTTATC**CCCCT**GAATT-----TAT**CAGGC**CGC**CCCAT**GC-  
 Enar --GATAAT-----AAAATCTTATT**CCCCT**AACCT-----TAC**CAGGC**CTT**CCCAT**GC-  
 Hpty --GATAAT-----TTAATCTCAAC**CCCCT**AATC-----CTAC**CAGGC**CAT**CCCAT**GC-  
 Nana --GATAAA-----ATATTCCAAC**CCTCT**AACCC-----CTAC**CAGGC**CAT**CCCAT**GC-  
 Mcst --GATAAT-----TAAATCTTAAAC**CCCCT**CATCCT-----AC**CAGGC**CGT**CCCAT**GC-  
 Rhox --GATAAC-----CTAATCTTAAAC**CCCCT**AGCCC-----TAC**CAGGC**CGC**CCCAT**GCC  
 Opfa --GACAAT-----TAAATCCTAGC**CCCCT**AATCC-----TAC**CAGGC**CGC**CCCAT**G--  
 Paar --GATATC-----ATAATCTTAA**CCCCT**GAAAT-----TAT**TGGGC**CGT**TTCAT**GCA  
 Gozo --GATGAC-----CCAATCTTAAAC**CCCCT**A-ACCC-----TAC**CAGGC**CGC**CCCAT**G-C  
 Ackr --GACACC-----CCTATCTTACC**CCTCT**AACCCT-----AC**TAGGC**CGT**CCCAT**ACC  
 Elev --GATAAT-----ATAATCTTAA**CCCCT**ACCC--TAA**CAGGT**TAT**TCTAT**GCC  
 Trdu --AATAAAGACAACACAATTTACC**CCCCT**AAGCCT-----AC**CAGGC**CGT**TCCAT**AAT  
 Amoc --GACAAT-----TAA-TCTTAA**CCCCT**AAACC-----CAC**CGGGC**CGC**CCCAT**G-C  
 Hame --GACAAT-----TAA-TTCTTAA**CCCCT**AAACC-----TAC**CAAGC**CAT**CCTAT**GCA  
 Chso --GATAAT-----CCC-ATCTTAA**CCCCT**AACA-----TAC**CAGGC**CGC**CCCAT**GCC  
 Lyto --GATCAC-----CACATCTTATC**CCCCT**AAACA-----TAA**TGAAC**CAC**CCCAT**GCA

Encr --GATCAC-----ATAATCTTATC**CCCCT**A--AACA----TAC**TGAAG**CAT**CCCAT**GCC  
 Bvar --GATCAT-----CTAATCTTAGT**CCTCT**ACCTT-----TAC**TGGGT**CGT**CCTAT**GCA  
 Noco --GATCAT-----TTAATCTTATC**CCCCT**AAACT-----TAT**TGAGC**CGT**CCCAT**GC-  
 Chsp --GACCAC-----TCAACCCTAAC**CCTCC**TACCAT-----AC**TAGAC**TGT**TCCCT**GAC  
 Arja --GATCAC-----CTAATCTTACC**CCCCT**A--AACA----TAC**TGGAC**CGT**CCCAT**GCC  
 Pase --GATATA-----TACCTCTCAAT**TCCCT**TTAAT-----TAC**CAGGC**CTA**TCCAT**A-C  
 Trel --GATT-A-----TATTTCTTCAG**CCCCC**A---ATTC---TAC**CGGGC**CCC**TCCAT**TCA  
 Lifa --GATAAC-----TCACTCTTAAC**CCGCT**CCTAA-----TAC**CAGGC**CAA**TCTAT**ATC  
 Acur --TGATA-----GGATTCTTATT**CCCCT**TAAAAT-----TAT**CAGGC**CCT**CCTAT**A-C  
 Ampe --GATAAC-----CAAATCTTACT**CCCCT**AACC-----CTAC**CGGGC**CGC**CCCAT**GC-  
 Urja --GATGAT-----TTTATCTTAGA**CCCCT**AAATT-----TAC**CGGGC**CAG**CCTAT**GC-  
 Enet --GGTAAA-----TATTTCTTAAC**CCTTC**AAGCCT-----TAT**CGGGC**CAT**TCCAT**TTT  
 Ptbr --AATATA-----CT-CACTTATT**CCCCT**TAATAT-----TAT**CAAGC**TGC**CTTAT**GTC  
 Safa --ATTACC-----CCCCTCCGAAC**CCTCC**G-AGAA-----TAT**CGTGC**TAC**TTTAT**G-C  
 Icae --GATAAT-----CACATCCTAAC**CCCCT**AATACT-----AT**CAGGC**CAT**CTCAT**GC-  
 Asmi --GATATT-----AC-CCCTAAAA**CCCTT**ATATTCC---CTAC**CAGAT**TCT**CCTAT**GC-  
 Foal --GAAAAC-----AGTTCTCAACC**CTCTT**CAAC-----TAT**CAGGC**TAT**ACTAT**TT-  
 Drze --AATATA-----AATATCCCAAT**CCCCT**AAAAC-----TTAA**CAGGC**CTT**TCCAT**AT-  
 Rhas --GACAAG-----CACATCTTAAA**CCCCT**TA-TTT-----TAT**TAGGC**CTT**TCCAT**GCC  
 Elac --GACGAA-----ACCATCTTAAA**CCTCT**TAACC-----TAT**TAGGC**CTC**CCTAT**GC-  
 Kugu --GATAAA-----CACATCTTATC**CCTCC**AA-ACC-----TAT**CAGGC**CAT**TCTAT**GC-  
 Plor --GATAAC-----TATTTCTTAAT**CCCCT**AACTC-----TAT**CAGGC**CGC**CCCAT**GC-  
 Sgun --GATAAT-----ACCTTCTTAAC**CCCCT**AACCA-----TAA**CAGGT**TAT**CCCAT**GCC  
 Zaco --GATAAT-----CCTATCTCACC**CCCCT**AACAC-----TAC**CAGGC**CAT**CCTAT**GCA  
 Zbfl --GATAAC-----CCTACTTAAAT**CCCCT**AACC-----TTAC**CGAGC**CAT**CCCAT**GCC  
 Spba --GATAAC-----CCAATCTTAAC**CCCCT**AACCC-----TAT**CAGGC**CGT**CCTAT**GCC  
 Game --GATAAC-----CAAATCCCAAC**CCCCT**AACAT-----TAT**CAGGC**CAT**CTCAT**G-C  
 Thth --GATAAC-----CATATCCCAAC**CCCCT**AA-TAT-----TAT**CAGGC**CAT**CTCAT**GCA  
 Xigl --GATAAC-----CAAATCTTAAC**CCCCT**AACTC-----TAC**CAGGC**CGC**CCCAT**GCA  
 Hyja --GATAAC-----CAAATCCCAAC**CCCCT**AAACAC-----TAT**CAGGC**CAT**CTCAT**GCA  
 Psan --GATAAC-----CAAATCTCAAC**CCCCT**TAATAT-----TAC**CAGGC**CAT**CTCAT**GC-  
 Cupa --GATAAA-----CATATCCTAAC**CCCCT**AACACT-----AT**CAGGC**CAT**CTCAT**GCA  
 Mpch --GATAAA-----ATA-TCTTATT**CCCCT**AG-TAA-----TAT**CAGGC**CGC**TCCAT**AT-  
 Char --GACAAC-----CCTACTTAAAC**CCCCT**ACTTCC-----CAC**TAGGC**TGT**TTTAT**GCA  
 Pser --GATAAC-----CCAATCTTATC**CCCCT**A--AACT---TAT**CAGGC**CGC**CCCAT**GCA  
 Prol --GATAAC-----CTTATCTTAAAT**CCCCT**AAAT-----TTAA**CGAGC**CCC**CCTAT**GCC  
 Plbi --GATAAC-----CTTATCTTAAAT**CCCCC**ACATTT-----AA**CAGGC**CCT**CCTAT**GCA  
 Calu --ATTA---ACTTTCTAAAG**CCCCA**TAATT-----TAT**CAGAC**CTT**TCCAC**CC-  
 Papa --GATAAT-----ACACCCACC**CCCCT**GCAACAC----TAC**CAAGC**CAC**CCCAT**A--  
 Suf r --GATAAC-----ACAAATCTAAAT**CCCCT**AAATT---TATAT**CAGGC**CCT**CCTAT**GC-  
 Stci --AATA---TTTTCTGATTC**CCCCA**CTAT-----TAA**CAGGC**CTC**CCTAT**GC-  
 Taru --AATA---ACACTCCTAAC**CCCTT**CCCC-----TAC**CGGGC**TTT**TCTAT**GCT  
 Rala --GATAAT-----CCTTTCTTAAAT**CCCCT**ATAAC-----TAC**CGAGC**CGT**CCTAT**G-C

|      | 24'      | 6'    | A        | 25   |      |          |         |       |          |              |            |        |       |       |
|------|----------|-------|----------|------|------|----------|---------|-------|----------|--------------|------------|--------|-------|-------|
| Scca | AAA---TT | ATAAA | AGAACTTA | -TGT | -TAA | AATGAGTA | -A      | -T    | AAGAGGAT | -----        | AA         | ----   |       |       |
| Muma | ----AAAT | ATAAA | AGAACTTA | -TGC | -TAA | AATGAGTA | -A      | -T    | AAAGAGAA | -----        | CA         | -AAT   |       |       |
| Erca | T-----A  | TTAGA | AGAAATTA | -TGC | -TAG | A        | ACTAGTA | -A    | -T       | AAGAAAAA     | -----      | GA     |       |       |
| Pose | ----TAA  | ATAGA | AGAAACAA | -TGC | -TAG | A        | ACTAGTA | -A    | -T       | AAGAAAAA     | -----      | TGATT  |       |       |
| Actr | ----AACT | ATAGA | AGCAATAA | -TGC | -TAA | A        | ATTAGTA | -A    | -C       | AAGAAGGTA    | -----      | C      | -GACC |       |
| Scal | GC-----T | ATAGA | AGCAATAA | -TGC | -TAA | A        | ATTAGTA | -A    | -C       | AAGAAGGC     | -----      | AC     | --GA  |       |
| Posp | ----ACT  | ATAGA | AGCAATAA | -TGC | -TAA | A        | AT      | -AGTA | -A       | -C           | ANGAAGGC   | -----  | N     | -CGAC |
| Atsp | -TT----- | ATAGA | AGAAATAA | -TGC | -TAA | A        | ATTAGTA | -A    | -T       | AAGAAGAC     | -----      | ATGAT  |       |       |
| Leoc | T---T--T | ATAGA | AGAAATAA | -TGC | -TAA | A        | ATCAGTA | -A    | -T       | AAGAAGGCA    | -C-----    | GA     |       |       |
| Amca | ----AAT  | ATAGA | AGTAATAA | -TGC | -TAA | A        | ATTAGTA | -A    | -T       | AAGAAGGC     | -----      | ACGAC  | -     |       |
| Osbi | TAT----- | ATAGA | AGAAACAA | -TGC | -TAG | A        | ATAAGTA | -A    | -C       | AAGAAGAT     | -AT-----   | AAT    |       |       |
| Pabu | ----AACC | ATAGA | AAAGACAA | -TGC | -TAA | A        | ATTAGTA | -A    | -C       | AGGAAGAAA    | -----      | TGA    |       |       |
| Hial | ----AACT | ATAGA | AGCGATAA | -TGC | -TAA | A        | ATAAGTA | -A    | -T       | AAGAAGGTATG  | -----      | ACC    |       |       |
| Elha | --A--CCC | ATAGA | AGAGACAA | -TGC | -TAA | A        | ATCAGTA | -A    | -T       | AAGAAGGCA    | -----      | CAA    |       |       |
| Mlcy | ----AAAC | ATAGA | AAAAACAA | -TGC | -TAA | A        | ATCAGTA | -A    | -T       | AAGAAGACAC   | -----      | GA     | ---   |       |
| Algl | ----TGAC | ATAGA | AGCAATAA | -TGC | -TAA | A        | ATTAGTA | -A    | -C       | AAGAAGAAA    | -----      | TTGTTC |       |       |
| Ptgi | CCC----- | ATAGA | AGAGATAA | -TGC | -TAA | A        | ATCAGTA | -A    | -T       | AAGAAGGAAC   | -----      | AA     |       |       |
| Alaf | AA-----C | ATAGA | AGAGATAA | -TGC | -TAA | A        | ATGAGTA | -A    | -T       | AAGAAGAAAC   | -----      | GA     |       |       |
| Nock | ----TAAC | ATAGA | AGAGATAA | -TGC | -TAA | A        | ATGAGTA | -A    | -T       | AAGAAGGGA    | -----      | TGA    |       |       |
| Anja | CA-----C | ATAGG | AGAAACAA | -TGC | -TAA | A        | ATCAGTA | -A    | -T       | AAGAGGGCCC   | -----      | AAG    |       |       |
| Gyki | ----GCAT | ATGGA | GAAGATAA | -TGC | -TAG | A        | ACTAGTA | -A    | -T       | AAGAGGCCAC   | ----G--CC- |        |       |       |
| Syka | ----AGAC | ATAGG | AAAGATTA | -TGC | -TAA | A        | ATGAGTA | -A    | -T       | AAGAAGGAGT   | -----      | ATTAGA |       |       |
| Opma | CA-----C | ATAGA | AGAAATGA | -TGC | -TAA | A        | ATGAGTA | -A    | -T       | AAGAGGCACT   | -----      | CAG    |       |       |
| Comy | -----T   | ATAGG | AGAAATTA | -TGC | -TAA | A        | ATGAGTA | -A    | -T       | AAGAGAACTAG  | -----      | ACC    |       |       |
| Sasp | AT--T--  | ATAGA | AGAGATTA | -TGC | -TAA | A        | ATTAGTA | -A    | -T       | AAGAGAGCCC   | -----      | GC     |       |       |
| Eupe | ----CAC  | ATGGA | AAAAATAA | -TGC | -TAA | A        | ATTAGTA | -A    | -C       | TAGAAGCCAT   | -----      | GA     |       |       |
| Enja | CCC----- | ATGGA | AGAGACTA | -TGC | -TGG | A        | ACGAGTA | -A    | -C       | AAGAAGAAT    | -----      | GA     |       |       |
| Same | ----CATC | ATAGG | GGAGACCA | -TGC | -TAG | A        | ACGAGTA | -A    | -T       | AAGAAGGATA   | -----      | GA     |       |       |
| Chch | ----AAAC | ATAGA | AGAGACTA | -TGC | -TAG | A        | ATGAGTA | -A    | -C       | AAGAAGAACA   | -----      | GCCC   |       |       |
| Grgr | CC-----C | ATGGG | AACGACCA | -TGC | -TAG | A        | ATGAGTA | -A    | -C       | AAGAGGAGA    | -----      | AGATC  | -     |       |
| Caau | ----CAC  | ATGGA | AGAGATTA | -TGC | -TAA | A        | ATGAGTA | -A    | -C       | AAGAAGGCCCGC | -----      | C      |       |       |
| Cyca | CCC----- | ATGGA | AGAGATTA | -TGC | -TAA | A        | ATGAGTA | -A    | -C       | AAGAAGGCC    | -----      | GC     |       |       |
| Dare | ----AAAT | ATGGA | AGAAATTA | -TGC | -TAA | A        | ATGAGTA | -A    | -C       | AAGAAGAACCT  | -----      | GTAC   |       |       |
| Cost | TAC----- | ATGGA | AGAGACCA | -TGC | -TAA | A        | ATGAGTA | -A    | -C       | AAGAGAC      | -----      | AAC    |       |       |
| Leec | ----CCAC | ATGGA | AGAGACTA | -TGC | -TAA | A        | ATGAGTA | -A    | -C       | AAGAGG       | -----      | CACGA  |       |       |
| CrIa | CC-----C | ATGGA | AGAAACTA | -TGC | -TAA | A        | ATGAGTA | -A    | -C       | AAGGGG       | -----      | TCATGG |       |       |
| Clmc | ----CAAC | ATGGA | GGAGACCC | -TGC | -TAA | A        | ATGAGTA | -A    | -C       | AAGAAG       | ----A----  | AACCTC |       |       |
| Phin | AT-----C | ATGGA | GGAGACCC | -TGC | -TAA | A        | ACGAGTA | -A    | -T       | AAGAAGA      | -----      | AACC   |       |       |
| Icpu | CG-----C | ATGGA | TGAGATAC | -TGC | -TAA | A        | ATGAGTA | -A    | -T       | AAGAAG       | ---AA----  | CCC--C |       |       |
| Psto | TA-----C | ATGGA | AGAAATAC | -TGC | -TAA | A        | ATGAGTA | -A    | -T       | AAGAAAG      | -----      | AACCC- |       |       |
| Cora | ----AAC  | ATGGA | AACGACAC | -TGC | -TAA | A        | ATGAGTA | -A    | -T       | AAGAAGGTC    | -TA----    | CCAAGC |       |       |
| Eisp | AAC----- | ATGGA | GGAGATTC | -TGC | -TAA | A        | ATGAGTA | -A    | -C       | AAGAAAGACAC  | -----      | CCC    |       |       |
| Apal | ---GAC   | ATAGA | AGAGACCC | -TGC | -TAA | A        | ATGAGTA | -A    | -C       | AAGAAGAT     | -----      | ACCC   |       |       |
| EsLu | -C-----C | ATGGA | AAAGATTA | -TGC | -TAA | A        | ATGAGTA | -A    | -T       | AAGAGG       | -----      | AACAAC |       |       |
| Dape | -----T   | GTGGA | AAAGATTC | -TGC | -TAA | A        | ATGAGTA | -A    | -T       | AAGAGGAA     | -----      | ACAA   |       |       |
| Glse | CCC--CCC | CTGGG | AGCGACTA | -TGC | -TAG | A        | ATGAGTA | -A    | -T       | AAGAGGGA     | -----      | ACGAC  |       |       |
| Naar | CCCCCCCC | CTGGG | GGCGATTA | -TGT | -TAG | A        | ATGAGTA | -A    | -T       | AAGAGGGGACA  | -----      | AC     |       |       |
| Baoc | CCA--CCC | TTGGG | GGCGATTA | -TGC | -TAG | A        | ATGAGTA | -A    | -T       | AAGAGG       | -----      | TGCAA  |       |       |
| Opso | CCC-TCCC | CTGGG | AGAGACTA | -TGC | -TAG | A        | ATGAGTA | -A    | -T       | AAGAGG       | ---GA----- | CAA    |       |       |
| Alte | C-----CC | ATAGG | AGAGACAA | -TGC | -TAA | A        | ATGAGTA | -A    | -T       | AAGAAG       | -----      | ACGC   |       |       |
| Plap | CCC----- | ATAGG | AGAGATAA | -TGC | -TAA | A        | ATGAGTA | -A    | -T       | AAGAAGGAC    | -----      | GC     |       |       |

Plal CC--C--**ATGGG**AGTGACCC-TGC-TAG**A**ATGAGTA-A-TAAGAGGGGCTA-----CC  
 Sami ----CCC**ATGGG**AGCGACCC-TGC-TAG**A**ATGAGTA-A-TAAGAGGGGC--A----CACACC  
 Rere ----CTCC**GTGGG**AATGACCA-TGC-TAG**A**ATGAGTA-A-TAAGAGGGGTTA-----CC---  
 Gama TAT-----**GTGGA**AGAGACCA-TGC-TAT**A**ATGAGTA-A-CAAGGGGGT-AA-----GA  
 Onmy ----CCCC**ATGGA**AGAGATTA-TGC-TAG**A**ATGAGTA-A-TAAGAGAGT-----AC--AA  
 Sasa CAC-----**ATGGA**AGCGATTA-TGC-TAG**A**ATGAGTA-A-TAAGAGAG-GAC-----AAC  
 Cola ----CCC**ATGGA**AGAGATTA-TGC-TAG**A**ATGAGTA-A-TAAGAGGG---GA----C--AA-  
 Dita ----CCC-**ATAGG**AGAGCTTA-TGC-TAA**A**ATGAGTA-A-TAGGAGGGC-----ACGC  
 Gogr CC-----CATAAAAGACCCCC-TGC-TAA**A**ATTAGTA-A-TAAGAGAC---CC----CAC---  
 Chsl TCC-----**ATGGG**GGAGCCCC-TGC-TAA**T**ATGAGTA-A-TAAGGGAGGCTAGCCTTCGCTGC  
 Atja ----TAC**ATGGG**AAAGATTA-TGC-TAA**A**ATGAGTA-A-TAAGGGACT-----ATAAG-  
 lido ----CAAC**ATGGA**AAAGATTA-TGC-TAA**A**ATGAGTA-A-TAAGGGATTA-----TGA  
 Auja T-----CC**ATGAA**AGAGATTA-TGC-TTA**T**ATGAGTA-A-TAAGAGGA-----AATGA  
 Chag ----CCCC**ATGAA**AGAGACCA-TGC-TTA**T**ATGAGTA-A-CAAGAGGGC-----CAGCCC  
 Hami ----CCCC**ATGGA**AGAAATTA-TGC-TTA**T**ATGAGTA-A-TAAGAGGT-----ACATGA  
 Saun CC-----C**ATGGG**AGAAACGA-TGC-TTA**T**ATGAGTA-A-TAAGAGGCACAC-----GA  
 Nema AG--C--**ATGGA**AAAGACCC-TGC-TAA**G**ATGAGTA-A-TAAGAGGGA-CA-----GC  
 Disp CC-----**CTGGG**AAAGACCC-TGC-TAG**A**ATGAGTA-A-TAAGAGGA---G---CCTAC-  
 Myaf ----ACC**CTGGG**AGAGACCC-TGC-TAA**A**ATGAGTA-A-TAAGAGAG-----TACGC  
 Lagu -----**GTAGA**AGAAACCA-TGC-TAG**A**ATGAGTA-A-CAAGAGGC-----CCAAGC  
 Trtr T---ATAT**ATAGA**AAAGACTA-TGC-TAG**A**ACGAGTA-A-TAAGGGCCT-AT-----ACA  
 Zucr ----GGAA**ATAGA**AGAGATTA-TGC-TAG**A**ACGAGTA-A-TAAGGGTACTAT---T--TAA  
 Pxja C---AACC**ATGAG**AGTGACCA-TGC-TAA**A**ATGAGTA-A-TAAGAGGGTA-C-----GA-  
 Pxlo ACC-----**ATGAG**AGTGACCA-TGC-TAA**A**ATGAGTA-A-TAAGAGGG---TA-----CGA  
 Pctr ----CCC-**GTGGG**GGAGATAA-TGC-TAA**A**ATGAGTA-A-TAAGAGGGC-----AA-GC  
 Apsa TC--AGCC**ATAGG**AGAGACTA-TGT-TAA**T**ATGAGTA-A-CAAGAGGG-----CCTGC  
 Cabe T---CTT**ACATA**AGTGATTC-TGC-TAA**T**ATGAGTA-A-TAAGGGGCTC-C----AACGG  
 Bzze A---ATT**ATGTG**AGTGACTA-TGC-TAA**T**ATGAGTA-A-TAAGAGAACA-T-----CCGG  
 Siim C---AACC**ATGTG**AGTGATTA-TGC-TAA**T**ATGAGTA-A-CAAGAGTGAA-G-----GAA  
 Ctru A-----AT**GTGGA**AGAGACCA-TGC-TAA**T**ATGAGTA-A-TAAGAGGG-----AGACC  
 Dpbr ----TAAT**ATGGA**AGAGACCA-TGC-TAA**T**ATGAGTA-A-TAAGAGGGAA--A---AC----  
 Caki CC-----C**ATAAG**AATAATTA-TGC-TAA**A**ATGAGTA-A-TAAGAAGA---A---A--AT-  
 Phja TT-----C**ATAAG**AACAATTA-TGC-TAA**A**ATGAGTA-A-TAAGAAGA---AT----CTAATT  
 Brsp -----T**ATAAA**AGAAATTA-TGT-TAA**A**ATGAGTA-A-TAAGAATT-----A  
 Gamo ----CCC**ATAAG**AACAATTA-TGC-TAA**A**ATGAGTA-A-TAAGAAGA---A---TTTAAT  
 Lolo CCC-----**ATAAG**AACAATTA-TGC-TAA**A**ATGAGTA-A-TAAGAAGA-ATAT-----AAT  
 Batr CT-----G**ATGTA**GATAA---TGC-TAA**T**ATGAGTA-A-TATGGAAC-----  
 Prmy ----A---**ATAGT**AGAGACAA-TGC-TAG**T**ATGAGTA-A-TAAGAGGCC-----TCA---  
 Loli -----T**ATAGG**AGCTATAC-TGT-TAA**T**ATGAGTA-A-TAAGAAAGTACCCT---ACAAGG  
 Loam ATC-----**ATAGG**AATTATAC-TGC-TAA**T**ATGAGTA-A-TAAGAGAACATA-----AGG  
 Chab ----AAAC**ATGGA**AGAGATAA-TGC-TAA**T**ATGAGTA-A-TAAGAGGGCTACA---CCCC--  
 Chto AA-----C**ATGGA**AGAGATAA-TGC-TAA**T**ATGAGTA-A-TAAGAGGG---CT----CCACCC  
 Majo CG-----T**ATGGG**AGTGACCA-TGC-TAA**T**ATGAGTA-A-TAAGAGAG---T----CAAGG-  
 Hlst ----AACC**ATGGA**AAAGATAA-TGC-TAA**T**ATGAGTA-A-TAAGAAAGA--CT----AACCT  
 Clpe ----AAC-**ATGGG**AAAGATTA-TGC-TAA**T**ATGAGTA-A-CAAGAGGGC-----CACCCC  
 Mlmr ----AAGC**ATGGA**AAAGATTA-TGC-TAA**T**ATGAGTA-A-TAAGAGGGCT-----ACCC  
 Crcr AGC-----**ATGGA**AGTGATTA-TGC-TAA**A**ATGAGTA-A-TAAGAGAAT-----ACGTC  
 Muce AGC-----**ATGGA**AGTGATTA-TGC-TAA**A**ATGAGTA-A-TAAGAGAATAC-----GT  
 Bege ----CCTT**ATGGG**AGTGATCA-TGC-TAA**T**ATGAGTA-A-TAAGAAAG---AA---C--ACT  
 Mela AT-----**ATGGG**AATAATAA-TGC-TAA**T**ATGAGTA-A-TAAGAGAGCAA-----GAC  
 Hats T---ACAT**ATAGG**AGCGACTA-TGC-TAG**T**ATGAGTA-A-CAAGAGAGCC-C-----TGA  
 Orla ----TTT**ATGAA**AGAAATTA-TGC-TAG**T**ATGAGTA-A-TAAGAAGTTCTG-----AA



Cosa -----A-T**ATAGA**AGCGATTA-TGC-T**AAT**ATGAGTA-A-T**AAGAGGC**-----TACAAC  
 Exsp -----GTA-**ATAGA**AGAGATAA-TGC-T**AAT**ATGAGTA-A-T**AAGAGATG**-----AAGAT-  
 Depa --G-T--**GTGGA**AACAATTA-TGT-T**AAT**ATGAGTA-A-T**AAGAGGCAC**-----AA  
 Rima C-----**ATAAA**AGCAACCA-T**AC**-T**AAC**ATGAGTA-A-T**AAGAGACCC**-----GAA  
 Fuol TC-----T**ATAGG**AAAGATTA-TGC-T**AAT**ATGAGTA-A-T**AAGAGAA**-----CTTGT-  
 Gmaf AA-----**ATAGA**AGAGATTA-TGC-T**AAA**ATGAGTA-A-T**AAGAGAA**-----T-ACAC  
 Xeei ----CCTA**ATAGA**AAAGATTA-TGC-T**AAA**ATGAGTA-A-T**AAGAGAAT**-----ACGCT-  
 Pros CC-----C**ATGGA**AGAGATCC-TGC-T**AAT**ATGAGTA-A-T**AAGAAAA**---TC---CCAGAT  
 Scmi ----CCCC**ATGGA**AAAAATAC-TGC-T**AAC**ATGAGTA-A-C**AAGAAAA**---C---CCCAGA  
 Rolo GC-----C**ATGAA**AGAGACCA-TGC-T**AAT**ATGAGTA-A-T**AAGAAGG**---T---AGCAGA  
 Cere A---ACC**ATAGG**AGAGACTA-TGC-T**AAT**ATGAGTA-A-T**AAGAAGGAA**-A----ATTAAA  
 Daga ----GACC**ATGAA**AGAGACCA-TGC-T**AAT**ATGAGTA-A-C**AAGGGGGCACTC**---ATAGAC  
 Anco ACC-----**ATGAG**AGAGTTAA-TGC-T**AAA**ATGAGTA-A-T**AAGAGGGA**-----A--GC  
 Dmve AC-----C**ATGAG**AGAGTTTA-TGC-T**AAA**ATGAGTA-A-T**AAGAGGGCAC**-----GC  
 Dmar ----CACC**ATGAG**AGAGTTTA-TGC-T**AAA**ATGAGTA-A-C**AAGAGGG**-----CACGC  
 Anka ----AACC**ATGAG**AGAGTTAA-TGC-T**AAA**ATGAGTA-A-T**AAGAGTTA**-----GC  
 Moja ----AGCC**ATGAG**AGAGTTAA-TGC-T**AAA**ATGAGTA-A-T**AAGAGGG**---T---AG-CCC  
 Hoja ----ACCC**ATGAG**AGAGTTTA-TGC-T**AAA**ATGAGTA-A-T**AAGAGGTA**-----GC  
 Bede GCC----**ATGGG**AGAGACCC-TGC-T**AAT**ATGAGTA-A-C**AAGAAAATTTCT**-----AGA  
 Bosp ----ACC**ATGGG**AGAGACCC-TGC-T**AAT**ATGAGTA-A-C**AAGAAAA**---T---TCTAGA  
 Mysp ----ACCC**ATGTA**AGAGATCC-TGC-T**AAT**ATGAGTA-A-T**AAGGAAGC**-----ATAAGA  
 Osja ACC-----**ATGTA**AGAGATCC-TGC-T**AAT**ATGAGTA-A-T**AAGAATGTCCTT**-----AGA  
 Sgro ----AACC**ATGTG**AGAGATCC-TGC-T**AAT**ATGAGTA-A-T**AAGAACG**-TACC---AGA---  
 Pzpa CC-----C**ATGAG**AGTGATAA-TGC-T**AAA**ATGAGTA-A-T**GAGAAAATAAAA**-----CT  
 Zeja T-----TC**ATGAG**AGTGATAA-TGC-T**AAA**ATGAGTA-A-T**AAGAAGC**-----ATATG  
 Znne ----CCCC**ATGAG**AGTGATAA-TGC-T**AAA**ATGAGTA-A-T**AAGAAGTT**-----ATAAC-  
 Zefa ----TCC**ATGAG**AGTGATAA-TGC-T**AAA**ATGAGTA-A-T**AAGAAGT**---A---ATAA--  
 Acni ----CCCC**ATGAG**AGTGATAA-TGC-T**AAA**ATGAGTA-A-T**AAGAAGTTA**-----TAA  
 Ncrh CC-----C**ATGAG**AGTGATAA-TGC-T**AAA**ATGAGTA-A-T**AAGAAGT**-----TATAA-  
 Agca TAA--ACC**ATGGG**AGAGATTA-TGC-T**AAT**ATGAGTA-A-T**AAGAGAGC**-----CC---T  
 Hydy ----TTTC**ATGGG**AGTGACGA-TGC-T**AAT**ATGAGTA-A-T**AAGGGGG**---C---CTACGC  
 Gsac T-----TC**ATGGG**AGTGATTA-TGC-T**AAT**ATAAGTA-A-T**AAGGGAGC**-----CAATGC  
 Pevo AC-----T**ATAGA**AACAATTA-TGC-T**GAT**ATGAGTA-A-T**AAGAGAA**-----T-AAGA  
 Hiku ----ATAC**ATGAA**AATGATAA-TGC-T**AAT**ATGAGTA-A-T**AAGAGAAGT**--T---AAGATT  
 Inpa ----AAAC**ATGGA**AGTGACAA-TGC-T**AAT**ATGAGTA-A-T**AAGAAAGC**-----AAG  
 Auch ACT-----**ATTGA**AGCGAAAA-TGC-T**AGA**ATGAGTA-A-C**AAGAGACCCC**-----AGA  
 Fico -T-AA-**ATGGG**AGTAATTA-TGC-T**AAT**ATGAGTA-A-T**AAGAGAA**-----CCAAGC  
 Macs ----AACT**GTGGA**AGTGACCA-TGC-T**AAT**ATGAGTA-A-T**AAGAAAT**-----TAAGAA  
 Moal CA-----C**ATGAA**AGTAATTA-TGC-T**AAT**ATGAGTA-A-T**AAGAGAGC**-----TC--GC  
 Syma TAC-----**ATGAG**AGCGATTC-TGC-T**AAT**ATGAGTA-A-T**AAGAGAGCTAC**-----GCC  
 Maf r ----ACC-**ATGGA**AGAAATTA-TGC-T**AAT**ATGAGTA-A-T**AAGAGAAC**-----CACAC  
 Dcpe AA-----T**ATGGG**AGTGATCC-TGC-T**AAT**ATGAGTA-A-T**AAGAGAA**-----ATAACA  
 Dct i GA-----T**ATGGG**AGTGATCC-TGC-T**AAT**ATGAGTA-A-T**AAGAGAA**---A---TAACA-  
 Hehi AAC----**ATGGG**AGAGACCC-TGC-T**AAT**ATGAGTA-A-T**AAGAGAGCCAA**-----GC  
 Stam CC-----C**ATGGA**AGCGACTA-TGC-T**AAT**ATGAGTA-A-T**AAGAGAGCTCCG**-----CC  
 Hogi ----AACC**ATGGG**AGCGACCA-TGC-T**AAT**ATGAGTA-A-T**AAGAGACCC**-----CGC  
 Erzo ----TAC**ATGGG**GGTGACTA-TGC-T**AAT**ATGAGTA-A-C**AAGAGAG**---CC---TCGGA-  
 Hxot ----AAC**ATGGG**AGTGACTA-TGC-T**GAA**ATGAGTA-A-T**AAGAGAG**-C-TA---CCGG--  
 Core CC-----C**ATGGG**AGTGACTA-TGC-T**AAT**ATGAGTA-A-T**AAGAGGG**---CC---AAAGGC  
 Apve TG-----C**ATGGG**AGTAACTA-TGC-T**AAT**ATGAGTA-A-T**AAGAGAGCCT**-----ACGC  
 Lat j ----AAAC**ATGGG**AGCGACCA-TGC-T**AAC**ATGAGTA-A-T**AAGAGGATG**-GC---CTACGC  
 Laja AA-----T**ATGGA**AGTGACCA-TGC-T**AAT**ATGAGTA-A-T**AAGAGAG**---C---CTCGC-

Syja ---AACT**GTGGG**AGTGACTA-TGC-TAA**T**ATGAGTA-A**C**AAGAGAG---C-----CCCGGC  
 Epme ---ACAC**ATGGG**AGCGATCC-TGC-TAA**A**ATTAGTAT-A**T**AAGAGAAC---C---TAACGA  
 Grse AAC-----**ATGGA**AGCGACTA-TGC-TAA**T**ATGAGTA-A**T**AAGAGAGCTACC-----GCC  
 Clja AA-----C**ATGGA**AGTAATAA-TGC-TAA**T**ATGAGTA-A**T**AAGAGAG---CA---CTCGCC  
 Ogcy CC-----A**ATAGA**AGAAACAA-TGC-TAA**A**ATGAGTA-A**T**AAGAGGA---AA---CCCGCC  
 Plna ---TCC-**ATGGG**AGTGACCC-TGC-TAA**A**ATGAGTA-A**T**AAGAGACT-----CCAAA-  
 Lema ---AAAC**ATGGG**CGTGACTA-TGC-TAA**A**ATGAGTA-A**T**AAGAGAGTTAA-----GAC--  
 Etzo AA-----C**ATGGG**AGTGACCC-TGC-TAA**A**ATGAGTA-A**T**AAGAGAG---CC---CACGCC  
 Apse CC-----T**ATGGG**AGAGATTA-TGC-TAA**T**ATGAGTA-A**T**AAGAGAT-----CCCCGC  
 Epde AA-----C**AGGGG**AGCGACCA-TGC-TAA**T**ATGAGTA-A**T**AAGAGAACATCCG---CT----  
 Slja ---CTAT**ATGGA**AGTGATAA-TGC-TAG**A**ATGAGTA-A**T**AAGAGAGC-----CAGACT  
 Bsja ---AGC**ATGGG**GACGACCA-TGC-TAA**T**ATGAGTA-A**T**AAGAGAAC-----ATAAGA  
 Ecna ---TAAC**ATGGG**AATGATAA-TGC-TAA**T**ATGAGTA-A**T**AAGAGAGA-----TACCGA  
 Cohi ATT-----**ATGGA**AGTGATTA-TGC-TAA**A**ATGAGTA-A**T**AAGAGAGC--TT----AAGGC  
 Caar ---ACCC**ATGGG**GGCGACCC-TGC-TAA**A**ATGAGTA-A**T**AAGAGAGCA--T----ACC---  
 Came CT-----C**ATGGG**GGCGACCC-TGC-TAA**A**ATGAGTA-A**T**AAGAGAGCTACA-----CC  
 Mema A---CAC**ATAGG**AGTGACCA-TGC-TAA**T**ATGAGTA-A**T**AAGAGGACA-----CGC  
 Lenu ---CGTG**GAAGA**A---ACCA-TGC-TAA**T**ATGAGTA-A**T**AAGAGACTA--C---CAA-GG  
 Brja ---AAC-**ATGAG**AGTGCCCA-TGC-TAA**T**ATGAGTA-A**T**AAGAAGGC-----CCCGG  
 Plma AA-----C**ATGAG**AGTGCACA-TGC-TAA**T**ATGAGTA-A**T**AAGAGAACACCC-----GT  
 Emst ---AAAC**ATAGG**AGTGACCA-TGC-TAA**T**ATGAGTA-A**T**CAGAGAGTA-----TTA--C  
 Ptti ---AAC-**ATGGG**AGTGATAA-TGC-TAA**C**ATGAGTA-A**T**AAGAGAGC-----ACAAC-  
 Losu ---ACC-**ATGGG**AGAGACCA-TGC-TAA**T**ATGAGTA-A**T**AAGAGGGC-----TTCCGC  
 Geoy CCC-----**ATGGG**AACGACCA-TGC-TAA**A**ATGAGTA-A**T**AGGAAGGGCCAA-----CGC  
 Dipi CGA-C---**ATGGA**AGCGAACA-TGC-TAA**T**ATGAGTA-A**T**AAGAGAGCCTC-----GC  
 Pama C---AAAC**AGTGG**AGAAATAA-TGC-TAA**T**ATGAGTA-A**T**AAGAGAGAA-C-----AAA  
 Leob AC--CT--**ATAGA**AGCGATTA-TGC-TAA**T**ATGAGTA-A**C**AAGAGGGGG--T---CATAGC  
 Neba ---GTT**ATAGA**AGTGATAA-TGC-TAA**T**ATGAGTA-A**T**ATGAGACC-----  
 Pdpi CC-----C**ATGGG**TGTGATTA-TGC-TAA**T**ATGAGTA-A**C**AAGATGGGCCAA---CTACGC  
 Nimi ACC-----**ATGGG**AGCGACCA-TGC-TAA**T**ATGAGTA-A**T**AAGAGGGCAAAT----ACGCC  
 Uptr CT-----T**ATGGG**AGTGACCA-TGC-TAA**T**ATGAGTA-A**C**AAGAGAGTCAA-----GA  
 Pesc ---TACT**ATGGG**AGCGATCA-TGC-TAA**T**ATGAGTA-A**C**AAGAATGGCTTC---C--GCC  
 Baar ACT-----**ATGGA**AGCGACCC-TGC-TAA**A**ATGAGTA-A**T**AAGAGAGC-----CTCGC  
 Moar G-----AC**ATGGG**GGTGTCCA-TGC-TAA**T**ATGAGTA-A**T**AAGAGAGTAA-----ACCAA  
 Toja ---CCAC**ATAGG**AGTGATAA-TGC-TAA**A**ATGAGTA-A**T**AAGAGAGTACC-----CAACCC  
 Chau ---AGAC**ATGGG**AGAGATTA-TGC-TGA**A**ATGAGTA-A**T**AAGAGAGT---G---ACACGA  
 Chse ---AACC**ATGGG**GGCGATTA-TGC-TAA**T**ATGAGTA-A**T**AAGAGAGTA-----CTTAGA  
 Enar ---AAAC**ATGGG**AGTGACCA-TGC-TAA**T**ATGAGTA-A**T**AAGAGAGT-----CCTCGA  
 Hpty ---CTAC**ATGGG**AGCGACCA-TGC-CA**A**TATGAGTA-A**T**AAGAGAGCACCA---C--CCC  
 Nana ---AAAC**ATGGA**AGAGACCA-TGC-TAA**T**ATGAGTA-A**T**AAGAGAACA-----C--TCC  
 Mcst ---AAAC**ATGGG**AGTGACCA-TGC-TAA**T**ATGAGTA-A**T**AAGAGAGCC-----CTAAGC  
 Rhox ---CCC**ATGGG**AGCGATTA-TGC-TAG**A**ATGAGTA-A**T**AAGAGAGC-----CCTGAC  
 Opfa C---AAAC**ATGGG**AGTGACCA-TGC-TAA**T**ATGAGTA-A**T**AAGAGAGGC--CC-----CGC  
 Paar TAC----**ATGAA**AGCGACCA-TGC-TAG**A**ATGAGTA-A**T**AAGAGAAAT--CC-----AGC  
 Gozo ---ACAC**ATGGG**GGTGACCA-TG**T**-TAA**T**ATGAGTA-A**T**AAGAGAGC-----ACCCGC  
 Ackr CT-----T**ATGGG**AGTGATTA-TGC-TAA**A**ATGAGTA-A**T**AAGAAGGCC-----TGGC--  
 Elev TC--C---**ATAGA**AGAGATAA-TGC-TAA**T**ATGAGTA-A**T**AAGAGACA-CA-----GA  
 Trdu AC-----T**ATGGA**AGCGTTTA-TGC-CA**A**TATGAGTA-A**T**AAGAGAACCC-----  
 Amoc ---CTCC**ATGGG**AGCAATTA-TGC-TAA**A**ATGAGTA-A**T**AAGAGGGC-----ACTCAA  
 Hame ---TCC**ATAGG**AGTGACCC-TGC-TAA**T**ATGAGTA-A**T**AAGAGCGC-----TCAGAC  
 Chso --C---CC**ATGGG**AGTGACCA-TGC-TAG**T**ATGAGTA-A**T**AAGAGAA-----TAAGAC  
 Lyto CAC-----**ATGGG**GGTGACTA-TGC-TAA**T**ATGAGTA-A**T**AAGAGAGCCT-----CTGG

Encr ----TGC-ATGGGAGTGATTA-TGC-TAATATGAGTA-A-TAAGAGAGC-----CTTTGG  
 Bvar AG-----CATAGGAGTGACCA-TGC-TAGTATGAGTA-A-TAAGAGAGC-----CCTCAC  
 Noco ----CAACATGGGAGTGACCA-TGC-TAATATAAGTA-A-TAAGAAAGCC-----CTGGAC  
 Chsp T-----ACTGGGAAGCATTCTAT-TAATATGAGTA-A-TAAGTAAAGC-----AAGCCT  
 Arja ----CGC-ATGGGAGTGATTA-TGC-TAATATGAGTA-A-TAAGAGAGC-----TAAAGA  
 Pase T---TATTATGGAAGCGATTC-TGC-TAAATGAGTA-A-CAAGAGGGGG-CT---AGACAC  
 Trel ----ATTAATGGAAGAGACCA-TGC-TAAATTAGTA-A-TAAGAGGGC-----AAGACC  
 Lifa -----ATAGAAGAGATTA-TGC-TAATATGAGTA-A-TATGAAAAC-----TACAAC  
 Acur G---CACTATAGGAGTAACAC-TGC-TAGATGAGTA-A-CTGGAAAAC-----AAAAGA  
 Ampe ----AAACATGGGAGCGACCA-TGC-TAATATGAGTA-A-TAAGAGAGCTTAA---G--CC-  
 Urja ----AACCATAGGCGTGACCA-TGC-TAATATGAGTA-A-TTGGGGGCCTG-----A  
 Enet TAA---CTATGGAAGAGATAA-TGC-TAGTATGAGTA-A-CTGAGGTTG-----AGC  
 Ptbr CCC-----ATAAAGGCATTTT-TGC-TAGATGAGTA-A-TAAGAGAACT-----GA  
 Safa ----CACCATAAAATATTTAA-TGC-TAGATGAGTA-A-CAAGAGCCAA--C---GAA---  
 lcae ----AGACATGAGAGTGCACA-TGC-TAATATGAGTA-A-CAAGAGAGCCC-----GTC  
 Asmi ----AAACATAGGAAAAAATA-TGC-TAATATGAGTA-A-CTAGAGAAA-----GAC--  
 Foal ----AATATAGTAAAAATA-TGC-TAGTATGAGTA-A-TAAGGGGAA-----GCC-  
 Drze ----AATTATGGAAGTGATAA-TGC-TAAATGAGTA-A-CAAGAGACCTTAA---C-AT-C  
 Rhas CA----CATGGAAGAGACCA-TGC-TAACATGAGTA-A-TAAGAGGA-----CTAGTC  
 Elac ----GAACATAGAAGAGAATA-TGC-TAGATGAGTA-A-TAAGAGGGC-----C-GACC  
 Kugu ----ACCCATAGAAGTGACTA-TGC-TAATATGAGTA-A-TAAGAGAAA-----ACTAGA  
 Plor ----AGTCATGGGAGCGATCA-TGC-TAAATGAGTA-A-TAAGAGGGCTAC-----GCC--  
 Sgun CAC-----ATGGGAGAAATTA-TGC-TAATATGAGTA-A-TAAGAGAACAC-----GC  
 Zaco ----ACC-ATAGGAGCGATCA-TGC-TAATATGAGTA-A-TAAGAGAGTT--T----AACGC  
 Zbf1 CA-----CATGGGAGTGATCC-TGC-TAATATGAGTA-A-TAAGAGAAC-----CTACG-  
 Spba AAC----ATAGGAGCGACTA-TGC-TAATATGAGTA-A-TAAGAGACC--CC-----CGA  
 Game ----AAACATGAGAGTGCACA-TGC-TAATATGAGTA-A-CAAGAGAGC-----TCTGCC  
 Thth TAC----ATGAGAGTGCACA-TGC-TAATATGAGTA-A-CAAGAGAGCCTC-----CGC  
 Xigl GA-----CATGGGCGTGACTA-TGC-TAATATGAGTA-A-CAAGAGAGTACCTA---CCC--C  
 Hyja TAC----ATGAGAGTGCACA-TGC-TAATATGAGTA-A-TAAGAGAGT--AC----CCCGC  
 Psan ----ATACATGAGAGTGTATA-TGC-TGATATGAGTA-A-TAAGAGCGCA-----ACCCCG  
 Cupa GA-----CATGAGAGTGCACA-TGC-TAATATGAGTA-A-TAAGAGAGG-----ACTCGC  
 Mpch ----CATTATGGAAGGTGATAA-TGC-TAATATGAGTA-A-TAAGAGAGTA-----AGA  
 Char AAC-----ATGAAAGCACCAA-TGC-TAAATATGAGTA-A-TAAGAGAGC--AC----CGACC  
 Pser ----ACC-ATGGAAGGTGTCCA-TGC-TGATATGAGTA-A-TAAGAGAGT-----CACACC  
 Prol ----AAACATAGGGATGACCA-TGC-TAATATGAGTA-A-TAAGAGAATACTA---A-GTAC  
 Plbi TCA---CATAGGAACGACTA-TGC-TAATATGAGTA-A-TAAGAAAGTA-----TAACCA  
 Calu -----T-GTGGAGAGAACA-TGC-TAATATGAGTA-A-CAAGAAGACA-----CTACGA  
 Papa -----AATATGGGAGAGACCA-TGC-TAATATGAGTA-A-TAAGAGAAG-----TAATCC  
 Suf r ----AACCATAGGACTGATTA-TGC-TAATATGAGTA-A-TAAGAAAGTA-----CTGACT  
 Stci ----CCCCATAGGAAAGATTA-TGC-TAAATATGAGTA-A-TAAGAAAGAC-----AAGA  
 Taru TCC----ATAGAAGAAATTA-TGC-TAAATATGAGTA-A-TAAGGGGCC-----GAC  
 Rala ----CTGCATAGGAGCGACTA-TGC-TAGACCGAGTA-A-TAAGAGAATT--A----AT--GA

\* \* \* \* \*

|      | 26  | 27  | B     | 28    | 28'    |        |        |     |      |      |        |        |       |       |          |       |        |     |     |     |
|------|-----|-----|-------|-------|--------|--------|--------|-----|------|------|--------|--------|-------|-------|----------|-------|--------|-----|-----|-----|
| Scca | ACC | TCT | -CCC  | ACAC  | AAGTGT | AT     | -G     | TCA | -GAA | AGA  | ATTTAA | TCA    | CTGA  | TAA   | --       | TTA   | -AA    |     |     |     |
| Muma | --  | C   | TCT   | -CCC  | ACAT   | AAGTGT | AC     | -G  | TCA  | -GAA | AGA    | ATTTAA | TCA   | CTGA  | CAA      | --    | TTA    | -AT |     |     |
| Erca | TTT | TCT | -CCC  | GCAC  | AAGTGT | AA     | -G     | TTA | -GAC | AGG  | ACAAA  | -CC    | ACTAA | CAA   | --       | TTA   | -AA    |     |     |     |
| Pose | --  | T   | TCT   | -CCT  | GCAC   | AAGTGT | AA     | -G  | TTA  | -GAC | AGG    | ACAAA  | -CC   | ACTAA | CAG      | --    | TTA    | -AA |     |     |
| Actr | --  | T   | TCT   | -CCA  | AGCAC  | ACGTGT | AA     | -G  | TCA  | -GAC | CGG    | ACCCG  | -CC   | ACTGA | CAA      | --    | ATA    | --A |     |     |
| Scal | CCT | TCT | -CCA  | AGCAC | ACGTGT | AA     | -G     | TCA | -GAT | CGG  | ACCCG  | -CC    | ACTGA | CAA   | --       | ATA   | --A    |     |     |     |
| Posp | CTT | CTT | -CCC  | GCAC  | ATGTGT | AA     | -G     | TCA | AGAT | CGG  | ACTCA  | -CC    | GCTGA | CAA   | --       | ATA   | -AC    |     |     |     |
| Atsp | C   | -T  | TCT   | -CCA  | AGCAT  | ACGTGT | AA     | -G  | TCA  | -GAT | CGG    | ACACA  | -CC   | ACTGA | CAA      | --    | GTA    | -A  |     |     |
| Leoc | CCT | TCT | -CCA  | AGCAT | ACGTGT | AA     | -G     | TCA | -GAT | CGG  | ACACA  | -CC    | ACTGA | CAA   | --       | ATA   | --A    |     |     |     |
| Amca | -CT | TCT | -CCA  | AGCAT | CCCTGC | AA     | -G     | TCA | -GAC | CGG  | ACTCC  | -CC    | ACTGA | CAA   | --       | ATA   | --A    |     |     |     |
| Osbi | C   | -T  | TCT   | -CTC  | AGCAC  | ATGTGT | AA     | -G  | TCA  | -GAT | CGG    | ACCAC  | -CC   | ACTGA | CAA      | --    | TTAGAA |     |     |     |
| Pabu | TCT | TCT | -CCA  | AGCG  | ACGTGT | TT     | -A     | TCA | -GAC | CGG  | ACAAC  | -CC    | ACTGA | TAA   | --       | ATA   | -AA    |     |     |     |
| Hial | --  | T   | TCT   | -CCT  | AGCAC  | ATGTGT | AA     | -G  | TCA  | -GAT | CGG    | ACACC  | -CC   | ACTGA | CAA      | --    | TTA    | -A  |     |     |
| Elha | CCT | TCT | -CCT  | AGCAC | ATGTGT | AA     | -G     | TCA | -GAT | CGG  | ACCAA  | -CC    | ACTGA | CAA   | --       | ACA   | -A     |     |     |     |
| Mlcy | TCT | TCT | -CCA  | AGCAC | ATGTGT | AC     | -G     | TTA | -GAC | CGA  | ACTAA  | -TC    | ACTAA | CAA   | --       | ATC   | -AA    |     |     |     |
| Algl | --  | T   | TCT   | -CCT  | AGCAT  | GTGTGT | AG     | -G  | TCA  | -GAT | CGG    | ACAAG  | -CC   | GCTGA | CAA      | --    | TTA    | --G |     |     |
| Ptgi | CCT | TCT | -CCC  | GCAC  | ATGTGT | AA     | -G     | TCA | -GAT | CGG  | ACCC   | -CC    | ACTGA | C     | --       | AAATA | -A     |     |     |     |
| Alaf | TCT | TCT | -CCCT | GCAC  | ACCTGC | AA     | -G     | TCA | -GAT | TGG  | ACCAC  | -CC    | ACTGA | CAA   | --       | CTA   | --A    |     |     |     |
| Nock | CCT | TCT | -CCT  | GCAC  | ACCTGT | AA     | -G     | TCA | -GAT | TGG  | ACCAT  | -CC    | ACTGA | TAA   | --       | ATA   | --A    |     |     |     |
| Anja | CCC | TCT | -CCT  | AGCAC | ATGTGT | AA     | -G     | TCA | -GAC | CGG  | ACCGA  | -CC    | ACTGA | CAA   | --       | TCA   | --A    |     |     |     |
| Gyki | -CC | TCT | -CCCC | GCAC  | GATTGT | GA     | -G     | TCA | -GGC | AGG  | ACCAA  | -CC    | ACTGA | TAA   | --       | CTA   | --A    |     |     |     |
| Syka | CCT | TCT | -CCC  | GCAC  | ATGTGT | AA     | -G     | TCA | -GCT | CGG  | ACAGA  | -CC    | ACTGA | CAA   | --       | TTA   | --A    |     |     |     |
| Opma | CCC | TCT | -CCA  | AGCAC | AAGTGT | AA     | -G     | TCA | -GAC | CGG  | ACAAA  | -CC    | ACTGA | CAA   | --       | TTA   | --A    |     |     |     |
| Comy | --  | C   | TCT   | -CCG  | GCAC   | ACGTGT | AA     | -A  | TTA  | -GAG | CGG    | ACAAA  | -CC   | ACTGA | CAA      | --    | CTA    | --A |     |     |
| Sasp | CTC | TCT | CCT   | -G    | ACAC   | ATGTGT | AA     | -A  | CCA  | -GAC | CGG    | ACTAA  | -CC   | ACTGC | C        | --    | AATTA  | --A |     |     |
| Eupe | CCC | TCT | CC    | -CA   | GCAC   | TTGTGT | AA     | -G  | TCA  | -GAC | CGG    | AACAA  | -CC   | ACTGA | CAA      | --    | TTA    | --A |     |     |
| Enja | ACT | TCT | CCA   | -CG   | CAC    | AAGTGT | AT     | -G  | TCA  | -AAT | TGG    | ACCAA  | -CC   | ATCGA | C        | --    | AATCA  | --A |     |     |
| Same | CCT | TCT | CC    | -CA   | GCAC   | ACGTGT | AA     | -G  | TCC  | -AAT | CGG    | ACGAC  | -CC   | ATCGA | C        | -A    | --     | ATT | -AA |     |
| Chch | --  | T   | TCT   | -CCC  | AGCAC  | GTGTGT | AA     | -A  | CCA  | -GAT | CGG    | ACACC  | -CC   | TCTGG | AAA      | --    | TTA    | -A  |     |     |
| Grgr | --  | C   | TCT   | CC    | -CT    | GCAC   | ACGTGT | AG  | -G   | CCG  | -GG    | ACG    | ACCAA | -GC   | ACCGG    | C     | -A     | --  | AAT | -AA |
| Caau | -CT | TCT | CC    | -AA   | GCAC   | AAGTGT | AA     | -G  | CCA  | -AAT | CGG    | ACTAG  | -CC   | ATTGG | CAA      | --    | CTA    | --A |     |     |
| Cyca | CCT | TCT | CCA   | -AG   | CAC    | AAGTGT | AA     | -G  | CCA  | -AAC | CGG    | ACCAA  | -CC   | ATTGG | C        | --    | AACTA  | -A  |     |     |
| Dare | --  | T   | TCT   | -CCA  | AGCAC  | AAGTGT | AA     | -G  | CCA  | -AGT | TGG    | ACAAA  | -CC   | ATTGG | CAA      | --    | TTA    | -A  |     |     |
| Cost | ATC | TCT | CCA   | -G    | GCAT   | AAGTGT | AA     | -G  | CCA  | -CCC | CGG    | ATAAG  | -CC   | ACCGG | C        | --    | AATTA  | -A  |     |     |
| Leec | CCC | TCT | CC    | -TAG  | CAC    | AAGTGT | AA     | -T  | TTA  | -GAC | CGG    | ACTAA  | -CC   | ACTGA | AAA      | --    | TTA    | -A  |     |     |
| CrIa | CCC | CCT | CC    | -CG   | GCAC   | AAGTGT | AA     | -G  | CCA  | -GAC | CGG    | ACCCA  | -CC   | ACTGC | CAA      | --    | TTA    | -A  |     |     |
| Clmc | -CT | TCT | CCT   | CG    | GCCT   | ACGTGT | AA     | -G  | TTA  | -GAT | CGG    | ACAAC  | -CC   | ACTAA | CAA      | --    | TTA    | -A  |     |     |
| Phin | CCT | TCT | CC    | -TG   | ACCC   | ATGTGT | AA     | -G  | TCA  | -GAC | CGG    | ACCAA  | -CC   | ACTGA | TAA      | --    | TTA    | -A  |     |     |
| Icpu | -CT | TCT | CC    | -TAG  | GCCT   | ACGTGT | AC     | -G  | CTA  | -AAT | TGG    | ACCTA  | -CC   | ACTAG | C        | -A    | --     | ATT | -AA |     |
| Psto | CTT | TCT | CC    | -TAG  | GCCT   | ACGTGT | AC     | -A  | CTA  | -GAT | CGG    | ACCCA  | -CC   | ACTAG | TAA      | --    | TTA    | -C  |     |     |
| Cora | CCT | TCT | CC    | -TAG  | GCCT   | AAGTGT | AA     | -A  | TTA  | -GAT | TGG    | ACCAA  | -CC   | ACTAA | AACATTTA | -A    |        |     |     |     |
| Eisp | CTT | TCT | CCT   | -CAC  | CC     | AAGTGT | AA     | -G  | TCA  | -GAC | CGG    | ACCCG  | -CC   | ACTGA | C        | --    | AATTA  | -A  |     |     |
| Apal | C   | -T  | TCT   | CCT   | AG     | CCCC   | AAGTGT | AA  | -A   | CTA  | -GAT   | CGG    | ACCCT | -CC   | ACTAG    | CAA   | --     | TTA | -A  |     |
| Eslu | -CC | TCT | CC    | -TG   | GCAC   | CTGTGT | AA     | -G  | TCC  | -GGC | CGG    | ACCC   | -CC   | ACCGA | TTC      | --    | TTA    | -A  |     |     |
| Dape | TCC | TCT | CC    | -CC   | GCAC   | TAGTGT | AT     | -A  | TCC  | -GGC | CGG    | ATATA  | -CC   | ACCGA | T        | -C    | --     | CTT | -AA |     |
| Glse | C   | -C  | TCT   | C     | -CCA   | GCAC   | ATGTGT | AA  | -G   | TCC  | -GAT   | CGG    | ACCC  | -CC   | GCCGA    | TTA   | --     | ATA | -A  |     |
| Naar | -CC | TCT | CC    | -CA   | ACAC   | ATGTGT | AA     | -G  | TCC  | -GAC | CGG    | ACCC   | -CC   | ACCGA | CAA      | --    | ATA    | -A  |     |     |
| Baoc | CCC | TCT | CC    | -CA   | ACAC   | ATGTGT | AA     | -G  | TCC  | -GAC | CGG    | ACTCC  | -CC   | GCCGA | CAA      | --    | GTA    | -A  |     |     |
| Opso | CCC | TCT | CCC   | -GG   | CAC    | ATGTGT | AA     | -G  | TTC  | -GAC | CGG    | ACCC   | -CC   | ACCAA | C        | --    | AAGTA  | -A  |     |     |
| Alte | CCT | TCT | CC    | -CC   | GCAC   | ATGTGT | AA     | -G  | TTA  | -GT  | CGG    | ACCTT  | -CC   | ACTAA | CAA      | --    | ATA    | --A |     |     |
| Plap | CCT | TCT | CCC   | -AG   | CAC    | ACGTGT | TA     | -G  | TTA  | -GCC | CGG    | ACTCC  | -CC   | ACTAA | C        | --    | AAATA  | --A |     |     |

Plal CCC**TCT**CCC-**CGCAC**ATGTGT**AA**-**GTTG**-**GACCGG**ACCCC-**CCGCCGA**C--AAATA--A  
 Sami -CC**TCT**-CCTT**GCAC**ATGTGT**AA**-**GTCG**-**GACCGG**ACCCC-**CCACCGA**CAA--ATA--A  
 Rere CCC**TCT**-CCCC**GTAC**ACGTGT**AT**-**GTCG**-**GACCGG**ACCCC-**CCACCGA**TGA---TT-AA  
 Gama CCC**CCT**CCC-**CGCAC**CCGTGT**AA**-**ATCG**-**GACCGG**ACACC-**CCGCCGA**C--TATTA-A-  
 Onmy CTC**TCT**CC-CA**GCAC**ATGTGT**AA**-**GTCG**-**GACCGG**ACCCC-**CCACCGA**C-A--AAT-AA  
 Sasa T-C**TCT**C-CCA**GCAC**ATGTGT**AA**-**GTCG**-**GACCGG**ACCCG-**CCACCGA**CAA--ATA--A  
 Cola CCC**TCT**CC-CA**GCAC**ATGTGT**AA**-**GTCG**-**GACCGG**ACCCC-**CCACCGA**CAA--ATA--A  
 Dita CCC**TCT**CC-CC**GCGC**AAGTGT**AA**-**GTCG**-**GACCGG**ACCCC-**CCCTGGA**CAG--ATA--A  
 Gogr --**CCT**CC-AA**GCAC**ATGTGT**AA**-**GTCG**-**AACCGG**ACCCA-**CCATCGA**C-A--AAT-AA  
 Chsl CTC**CCT**CCC-**GCAC**AAGTGT**AA**-**GTCG**-**CACTGG**ACCCC-**CCGCCGA**C--AAATA-A-  
 Atja -TC**CCT**CC-CA**GCAC**AGGTGT**AC**-**ATCG**-**GAACGG**ACAAG-**CCACCGA**AAG--TTA-A-  
 lido ATC**CCT**CC-CC**GCAC**ATGTGT**AT**-**ATCG**-**GAACGG**ACAAA-**CCACCGA**AAA--TTA-A-  
 Auja CCC**TCT**CC-CT**GCAC**ACGTGT**AA**-**TTCG**-**GAACGG**ACTCA-**CCACCGA**CAA--TTA-A-  
 Chag --**CCT**CCGTA**GCAC**ATGTGT**AA**-**GTCG**-**GATTGG**ACACA-**CCACCGA**CA---TTT-AG  
 Hami CCC**TCT**CC-GT**GCAC**ACGTGT**AA**-**GTCG**-**GAACGG**ACCCC-**CCACCGA**CA--ATT-AA  
 Saun CCC**TCT**CC-CA**GCAC**ACGTGT**AA**-**GTCG**-**GAACGG**ACCCC-**CCGCCGA**CAG--TTA-A-  
 Nema CCC**TCT**CCAAT**GCAC**AAGTGT**AC**-**CTCG**-**GAACGG**ACCCC-**CCACCGA**C--AGTCA-A-  
 Disp TCC**TCT**CC-CT**GCAC**ACGTGT**AA**-**ATCG**-**GAACGG**ACCCA-**CCGCCGA**CAA--CTA--A  
 Myaf CCC**TCT**CCGTC**ACAC**ATGTGT**AA**-**GTCG**-**GAGCGG**ACCCG-**CCCCCGA**TAA--CTA-A-  
 Lagu GCC**TCT**CC-TT**GCAC**AAGTGT**AC**-**CCCG**-**GCCTGG**ACCCC-**CCACCGG**AAA--CTA-CC  
 Trtr ACC**CCT**CC-CT**GCAT**AAGTGT**AC**-**CTCG**-**GACCGG**ACCAC-**CCCCCGA**ACA--TTA-TA  
 Zucr -CC**CCT**CC-TT**GCAT**AAGTGT**AA**-**CTCG**-**GACCGG**ATTCC-**CCACCGA**AAT--TTA-TC  
 Pxja CCC**TCT**CC-CT**GCAC**ATGTGT**AA**-**GTCG**-**GAACGG**ACCTA-**CCACCGA**CAA--ATA-AC  
 Pxlo CCC**TCT**CCC-T**GCAC**ATGTGT**AA**-**GTCG**-**GAACGG**ACCTC-**CCACCGA**C--AAATA-AA  
 Pctr CCC**TCT**CC-CA**GCAC**CCGTGT**AA**-**GTCG**-**GAGCGG**ACCCG-**CCACCGA**CCA--TTA-AC  
 Apsa CCC**TCT**CC-AA**ACACC**AGTGT**AT**-**ATCG**-**GAACGG**ACACC-**CCACCGA**CCA--TTA--A  
 Cabe CCC**CCT**CC-T**GCAC**ACGTGT**AT**-**AGCG**-**AAACGA**ACCC--**TCAATCGG**CAA--CTA-A-  
 Bzze TTC**TCT**CC-CA**ACACA**AAGTGT**AA**-**ATCG**-**GATCGG**ACCCC-**CCGCCGA**CTA--TTA-A-  
 Siim --**CCT**CCTAC**ACACA**AAGTGT**AA**-**GTCG**-**AAACGG**ACCAC-**CCATCGA**CCA--TTA-A-  
 Ctru CCC**TCT**CC-TT**GCAC**AAGTGT**AA**-**ATCG**-**GAACGG**ACCCA-**CCACCGA**CCC--CTA-TC  
 Dpbr -CC**TCT**CC-TT**GCAC**AAGTGT**AA**-**ATCG**-**GAACGG**ACCCA-**CCACCGA**CCC--CGA-CC  
 Caki TCT**TCT**CC-CA**GCAT**AAATGT**AA**-**GTCG**-**GACCGG**ACCAC-**CCACCGA**TTA--CTA-CA  
 Phja C-T**TCT**CC-T**GCAC**AGTGT**AT**-**GTTG**-**GAACGG**ACCCC-**CCACCA**CAG--TTA-TT  
 Brsp TAT**TCT**CC-TT**GCAC**ATGTGT**AC**-**CTCG**-**GAACGG**ACCAG-**CCACCGA**ATA--TTA-AT  
 Gamo TCT**TCT**CC-T**GCAC**ATGTGT**AA**-**GTCG**-**GAACGG**ACCTC-**CCACCGA**CTA--TTA-AT  
 Lolo TCT**TCT**CCC-**AGCAC**ATGTGT**AA**-**GTCG**-**GAACGG**ACCTC-**CCACCGA**C--TATTA-AT  
 Batr -CA**CCT**CC-T**GCACA**ACTAT**AA**-**GTCG**-**TAAAT**-----**ATTGA**TCT--TTA-TT  
 Prmy -CC**TCT**CC-TT**ACAT**ACCTGT**TT**-**ATCA**-**CCCCG**AACCA-**CCATTGA**AAA--TTA-CT  
 Loli CTT**TCT**CC-T**GCAC**CCGTGT**AC**-**ATCG**-**GAACGA**ACCC--**CCACCGA**AAA--TCA-A-  
 Loam TTC**TCT**CCT-**AGCAC**AAGTGT**AA**-**ATCG**-**GAACGA**ACCC--**CCACCGA**A--AATTG-A-  
 Chab -CC**TCT**CC-CT**GCAC**AAGTGT**AA**-**ATTC**-**GAACGG**ACCCC-**CCACCGA**ACT---TT-AA  
 Chto CCC**TCT**CC-CT**GCAC**AAGTGT**AA**-**ATTC**-**GAACGG**ACCAC-**CCACCGA**ACT--TT-A-A  
 Majo CTC**TCT**CC-TT**GCAC**AAGTGT**AA**-**GTCG**-**GAACGA**ACCCG-**CCACTGA**ACC--TT-A-A  
 Hlst --**TCT**CCCAC**ACACA**AAGTGT**AC**-**ATCG**-**CCCCGG**ACCAC-**CCACCGA**AAC--TCA-A-  
 Clpe -CC**TCT**CCCC**GCACA**ACTGT**AT**-**ATCG**-**GATCGG**ACACC-**CCGCCGA**ACT--TTA-A-  
 Mlmr -CC**TCT**CC-CC**GCAC**AAGTGT**AA**-**GTCG**-**GAACGG**ACCCC-**CCACCGA**GCT--TTA-A-  
 Crcr T-C**TCT**C-CCC**GCAC**ATGTGT**AA**-**ATCG**-**GAGCGG**ACTCC-**CCACCGA**AAC--TTA--A  
 Muce CTC**TCT**CCC-**CGCAC**ATGTGT**AA**-**ATCG**-**GAGCGG**ACTCC-**CCACCGA**A--ACTTA-A-  
 Bege --**TCT**CC-CC**GCTC**AAGTGT**AA**-**CTCG**-**GAACGG**ACCCC-**CCACCGA**AAA--TTA-A-  
 Mela T-C**TCT**C-CAC**GCACC**AAGTGT**AA**-**CCCG**-**GAACGG**ACCCC-**CCGCCGG**CCA--TTA--A  
 Hats CTC**TCT**CC-GT**ACACA**AAGTGT**AA**-**TTCG**-**GAACGG**ACCCC-**CCACCGA**GCA--TTA-A-  
 Orla -CT**TCT**CC-TT**GCAC**ACGTGT**AA**-**ATCG**-**GAACGG**ACAAA-**CCACCGA**ATT--TTA-A-

Cosa - -C**TCT**CCC-C**GCAC**AAGTGT**AA**-A**TCA**-**TAAACAG**ACAAA-**CTACTGA**ACA--TTA-A-  
 Exsp -TC**TCT**CC-AA**GCAT**AAGTGT**AT**-A**TCA**-**GAACAG**ACATC-**CTGCCGA**GAA--TTA-A-  
 Depa ACC**TCT**CCA-AG**GCAC**AAGTGT**AA**-A**TCA**-**ATACAG**ATTAA-**CTATTGA**A--TATTA-A-  
 Rima T-C**TCT**CT-AA**GAGT**ATCTGT**AA**-C**TCC**-**GAACGG**ACCCA-**CCGCCGA**A-A--ATT-AA  
 Fuol TTC**TCT**CC-AT**GCAT**AAGTGT**AA**-A**TCC**-**GAACGG**ACAGA-**CCACCGA**ACA--TTA-A-  
 Gmaf TTC**TCT**CC-CC**GCAC**ATGTGT**AA**-G**CCG**-**GCTCGG**ACCAC-**CCACCGG**CAA--TTA-A-  
 Xeei -TC**TCT**CC-GA**ACAC**ATGTGT**AC**-A**TCC**-**GAACGG**ACCAC-**CCTCCGA**AAT--TTA-A-  
 Pros -TT**TCT**CC-TT**GCAC**AAGTGT**AA**-G**TCC**-**GAACGG**ACCTT-**CCACCGA**CCC--CTA-AC  
 Scmi TTT**TCT**CC-TT**GCAC**ACATGT**AA**-G**TCC**-**GATCGG**ACTCC-**CCACCGA**CCC--CTA-AC  
 Rolo CCT**TCT**CC-CC**GCAC**ACGCGT**AT**-A**TCC**-**GAACGG**ACTCC-**CCACCGA**CCC--ACA-AC  
 Cere CCT**TCT**CC-TA**GCAC**ACGCGT**AC**-A**TCA**-**GAACGG**ACCCC-**CCACCGA**CCA--TTA-AT  
 Daga -CC**CCT**CC-TA**GCAC**GCGTGT**AC**-A**TCC**-**GAACGG**ACCAA-**CCTCCGA**CTA--TTA-AA  
 Anco CCC**TCT**C-CTT**GCAC**ACGTGT**AC**-A**TCC**-**GAACGG**ACTAC-**CCACCGA**TAA--ATA-AA  
 Dmve CCC**TCT**CC-TT**GCAC**TAGTGT**AC**-A**TCC**-**ACATGA**ACCCA-**CCACCGA**CCA--TTA-AA  
 Dmar CCC**TCT**CC-TT**GCAC**AAGTGT**AC**-A**TCC**-**ACATGG**ACCCA-**CCACCGA**CCA--TTA-AA  
 Anka CCC**TCT**CC-CC**GCAC**ACGTGT**AA**-G**TCC**-**GAACGG**ACAAC-**CCACCGA**CCA--TTA-AA  
 Moja - -C**TCT**CCC-C**GCAC**ACGTGT**AT**-G**TCC**-**GAACGG**ACCCA-**CCACCGA**CCA--TTA-AA  
 Hoja CCC**TCT**CC-TA**GCAC**ACGTGT**AT**-G**TCC**-**GAACGG**ACCTT-**CCACCGA**CCA--TTA-AA  
 Bede TTT**TCT**CCT-T**GCAC**AAGTGT**AC**-A**TCC**-**GAACGG**ACCCC-**CCACCGA**C--CCTTA-AC  
 Bosp TTT**TCT**CC-TT**GCAC**AAGTGT**AC**-A**TCC**-**GAACGG**ACCCC-**CCACCGA**CCC--TTA-AC  
 Mysp CTT**CCT**CC-CC**GCAC**AAGTGT**AC**-A**TCA**-**GAACGG**ACCCTT**CCACTGA**CCA--ATT-AC  
 Osja CCT**TCT**CCC-T**GCAC**ACGTGT**AC**-A**TCA**-**GAACGG**ACTCC-**CCCACTG**ACCAATTA-AC  
 Sgro CGT**TCT**CC-AC**GCAC**ACGTGT**AC**-A**TCA**-**GAACGG**ACTAAC**CCACTGA**TCC--ATT-AC  
 Pzpa - -T**CTT**CC-TG**ACAC**ATGTGT**AC**-C**ACG**-**GAGCGG**ATAAA-**CCACCGT**CCA--CTA-AT  
 Zeja ACT**TCT**CC-TA**ACAC**ATGTGT**AA**-G**TCC**-**GAACGG**AAAAA-**CCACCGA**CCA--CTA-AC  
 Znne - -T**TCT**CC-TA**ACAC**ATGTGT**AC**-C**TCC**-**GAACGG**AAAAT-**CCACCGA**CTA--ATA-GC  
 Zefa -CT**TCT**CC-TA**ATAC**ATGTGT**AT**-C**TCC**-**GAACGG**AAAAC-**CCACCGA**TCA--TTA-GC  
 Acni -CT**TCT**CCCAA**ACAC**ATGTGT**AC**-G**CCG**-**GAACGG**ATAAG-**CCACCGA**CCA--CTA-AC  
 Ncrh -CT**TCT**CC-CA**ACAC**ATGTGT**AC**-A**CCG**-**GAACGG**ATAAG-**CCACCGA**CCA--CTA-AC  
 Agca CTC**TCT**CC-CC**GCAC**AAGTGT**AT**-C**TCC**-**GAACGG**ACCCC-**CCACCGA**ACC--TTA-C-  
 Hydy CCC**CCT**CC-CC**GCAC**ACGTGT**AC**-A**CCG**-**GAACGG**ACCAC-**CCGCCGA**CTC--TTA-A-  
 Gsac CTC**CCT**CC-CC**GCAC**ACGTGT**AC**-A**TCC**-**GAACGG**ACAAC-**CCGCCGA**CCT--TTA-A-  
 Pevo CTC**TCT**CC-TA**GCAC**AAGTGT**AA**-C**TCC**-**GAACGG**ACT-C-**ACACCGA**AAA--CCA-A-  
 Hiku CTC**TTT**TT-TA**GCAA**AAGTGT**GC**-C**TCC**-**GATCGA**AC-TA-**ACACCGA**AAT--TTA-A-  
 Inpa CTT**TCT**CC-TA**GCAC**ACGTGT**AA**-A**TCC**-**GCACGG**AACAA-**CCACCGA**ACA--TTA-A-  
 Auch CTC**TCT**CCC-AG**GCAC**AAGCGT**AC**-C**TCC**-**GAACGG**ACCC--**GCACCGA**A--ATTCA-A-  
 Fico CTC**TCT**CC-AC**GCAC**ATGTGT**AC**-C**TCC**-**GAACGG**ACCT--**GCACCGA**ATT--TTA-A-  
 Macs -TT**TCT**CC-CT**GCAC**AAGTGT**AA**-A**TCC**-**GAACGG**ACCC--**CCACCGA**AT---CCT-AA  
 Moal CTC**TCT**CC-CC**ACAC**AAGTGT**AA**-A**TCC**-**AAACAA**ACCC--**CAACCGA**AAA--TTA-A-  
 Syma T-C**TCT**C-CAG**ACAC**TAACGT**AC**-A**TCA**-**AAACGA**ACCC--**ACATCGA**AAA--TTA--A  
 Mafr CTC**TCT**CC-CA**GCAT**CTGTGT**AC**-A**TCC**-**GAACGG**ACACC-**CCACCGA**ATA--TTA-A-  
 Dcpe CTC**TCT**CC-TA**GCAC**ATGTGT**AA**-A**TCC**-**GAACGG**ACTC--**ACACCGA**ACT--TTA-A-  
 Dcti CTC**TCT**CC-CG**GCAC**ATGTGT**AA**-A**TCC**-**GAACGG**ACCC--**ACACCGA**AC--TTT-AA  
 Hehi CTC**TCT**CCC-T**GCAC**ACATGT**AA**-T**TCC**-**GAACGG**AC-CC-**GCACCGA**G--CATTAA-  
 Stam -TC**TCT**CC-CT**GCAC**ACGTGT**AA**-G**TCC**-**GAACGG**ACTCC-**CCGCCGA**CCC--TTA-A-  
 Hogi ATC**TCT**CC-TA**GCAC**ATGTGT**AA**-A**TCC**-**GAACGG**ACTCC-**CCTCCGA**ACA--TTA-A-  
 Erzo CTC**TCT**CC-TT**GCAC**ATGTGT**AC**-G**TCC**-**GAACGG**ACACC-**CCGCCGA**CTC--TTA-A-  
 Hxot CTC**TCT**CC-CT**GCAC**ACGTGT**AT**-A**TCC**-**GAACGG**ACAAC-**CCACCGA**ACC--TTA-A-  
 Core -TC**TCT**CC-CC**GCAC**ACGTGT**AC**-A**TCC**-**GAACGG**ACACT-**CCACCGA**C-A--ATT-AA  
 Apve CTC**TCT**CC-CT**GCAC**ACGTGT**AC**-C**TCC**-**GAACGG**ACAAC-**CCGCCGA**CTC--TTA-A-  
 Latj CCC**TCT**CC-TA**GCAC**ACGTGT**AC**-A**TCC**-**AAACGG**ACCCG-**CCACCGA**AA---CTT-AA  
 Laja CTC**TCT**CC-TT**GCAC**AAGTGT**AA**-A**TCC**-**GACTGG**ACTCC-**CCGCCGA**AAA--TTA--A

Syja -TC**TCT**CC-CT**GCAC**ACGCGT**AA**-A**TCC**-**GAGTGG**ACCTC-**CCACCGA**ACC--TTA-A-  
 Epme CTC**TCT**CC-CT**GCAT**GCGTGT**AA**-A**TCCG****AAACGG**ACAAC-**CCACCGA**CC---CTT-AA  
 Grse T-C**TCT**CTCCA**ACAC**ACGTGT**AA**-C**TCC**-**AAACGG**ACAAA-**CCATCGA**ATA--CTA--A  
 Clja -TC**TCT**CC-CC**GCAC**AAGTGT**AA**-A**TCC**-**GAGCGG**ACCAC-**CCACCGA**ATA--ATA-AC  
 Ogcy C-C**TCT**CC-TG**ACAC**CCGCGT**AG**-A**TCC**-**GATCGA**ACCAA-**GCTCCGA**A-A--ATT-AA  
 Plna -TC**TCT**CC-TT**GTAC**AAGTGT**AA**-A**TCC**-**AAACGG**ACCCC-**CCACCGA**AAC--TTA-A-  
 Lema -TC**TCT**CC-CC**GCAC**ATCCGT**AA**-C**TCC**-**GAACGG**ACTA-A**CCACCGA**ACT---TT-AA  
 Etzo -TC**TCT**CC-TT**GCAC**GTGTGT**AA**-A**TCC**-**GAACGG**ACACC-**CCACCGA**A-C--CTT-AA  
 Apse ATC**TCT**CC-CT**GCAC**AAGTAT**AT**-A**TCC**-**GAACGA**ACTA--**ACACCGA**CAA--TTA-A-  
 Epde -TC**TCT**CC-TT**GCAC**ACGTGT**AA**-A**TCC**-**CAATGG**ACTTC-**CCACCGA**ATA--TTA-A-  
 Slja --C**TCT**CCT-C**GCAC**AAGTGT**AA**-T**TCC**-**ATACGG**ACCTA-**CCATCGA**AAA--TTA-A-  
 Bsja CTC**TCT**CC-TC**GCAC**ACGTGT**AA**-A**TCC**-**GAACGG**ACCCC-**CCACCGA**ACT--TTA-A-  
 Ecna CCC**TCT**CC-CT**GCAC**ATGTGT**AT**-A**TCC**-**GAACGG**ACAAA-**CCACCGA**CC---ATT-AA  
 Cohi T-C**TCT**C-CTG**GCAC**AAGTGT**AA**-A**CCG**-**GAAAGG**ACTTC-**CCGCCGG**AAA--TTA--A  
 Caar CTC**TCT**CC-TA**GCAC**ATGTGT**AA**-G**TCC**-**GAACGG**ACCAA-**CCACCGA**ATA--ATA-A-  
 Came CTC**TCT**CC-TA**GCAC**ATGTGT**AA**-A**TCC**-**GAACGG**ACCCC-**CCACCGA**ACA--ATA-A-  
 Mema CCC**TCT**CC-CT**GCAC**ACGTGT**AC**-A**TCC**-**GAACGG**ACCAA-**CCACCGA**ACA--TTA-AA  
 Lenu CTC**TCT**CC-CG**GCAC**AAGCGT**GA**-A**TCC**-**AAACGA**ACC-C-**CCATCGA**TCA--TTA-A-  
 Brja CTT**TCT**CC-TG**ACAC**ACGTGT**AA**-A**TCA**-**GAACGA**ACCC--**CCACTGA**AAC--TTA-C-  
 Plma CTC**TCT**CC-TC**GCAC**ACGTGT**AA**-C**TCC**-**GAACGA**ACC-C-**CCACCGA**AAC--TTA-A-  
 Emst CTC**TCT**CC-CT**GCAC**ACGCAT**AA**-A**TCC**-**GAACGG**ACCCC-**CCACCGA**ACC--TTA-A-  
 Ptti CTC**TCT**CC-TC**GCAC**ACGTGT**AA**-A**TCC**-**GAACGG**ACCTC-**CCACCGA**ACC--TTA-AC  
 Losu CCC**TCT**CC-CC**GCAC**ACGTGT**AA**-A**TCC**-**GTACGG**ACCAA-**CCACCGA**AAC--TTA-A-  
 Geoy CTT**TCT**CCC-C**GCAC**AAGTGT**AC**-A**TCC**-**GAACGA**ACAAA-**GCCCGGA**ACC--TTA-A-  
 Dipi CTC**TCT**CCT-C**GCAC**AAGTGT**AA**-A**TCC**-**GAACGG**ACATT-**CCACCGA**A--ATTTA-A-  
 Pama CTC**TCT**CC-CT**GCAC**AAGTGT**AC**-C**TCC**-**GAACGG**ACCAA-**CCACCGA**ATC--TTA-A-  
 Leob CCC**TCT**CC-TT**GCAC**AAGTGT**AC**-A**TCA**-**GAACGG**ACCCC-**CCACCGG**AAA--TTA-A-  
 Neba -TC**TCT**CC-TT**ACGC**AAGTGT**AC**-A**TCC**-**GAACGG**AGCCA-**CCACCGA**AAC--TTA-A-  
 Pdpi CCC**TCT**CC-CA**GCAC**ACGTGT**AC**-A**TCC**-**GAACGA**ACCCC-**CCACCGA**AAA--TTA-AC  
 Nimi T-C**TCT**C-CAC**GCAC**AAGTGT**AA**-C**TCC**-**GATCGG**ACTCC-**CCGCCGA**ACC--TTA--A  
 Uptr CTC**TCT**CC-TT**GCAC**AAGTGT**AA**-G**TCA**-**GAACGA**ACC-C-**GCACTGA**ACC--TTA-A-  
 Pesc -TT**TCT**CC-TA**GCAC**ACATGT**AC**-C**TCC**-**GAGCAG**ACTA-A**CTACCGA**ACC--TTA-A-  
 Baar CTC**TCT**C-CTT**GCAC**ACGTGT**AA**-A**TCC**-**GAACGG**ACCCC-**CCACCGA**AAT--CTA-A-  
 Moar CTC**TCT**C-CCT**GCAC**ACCTGT**AC**-A**TCC**-**GAACGG**ACCAC-**CCACCGA**ATA--TTA-A-  
 Toja CTC**TCT**CC-CC**GCAC**ACGTGT**AA**-A**TCC**-**GAACGG**ACCC-**CCACCGA**AAC--TTA-AA  
 Chau CTC**TCT**CC-TA**TACA**AAGTGT**AA**-A**TCC**-**AAATGG**ACCTA-**CCATCGA**AT---ATT-AA  
 Chse CTC**TCT**CC-CC**GCAC**AAGTGT**AA**-A**TTC**-**GAACGG**ACTAC-**CCACCAA**ACC--TTA-A-  
 Enar CTC**TCT**CC-CT**GCAC**ACCTGT**AA**-A**TCC**-**CAATGG**ACCTT-**CCACCGA**ATC--TTA-A-  
 Hpty -TC**TCT**CC-CT**GCAC**ACGTGT**AA**-A**TCC**-**GAACGG**ACCC-**CCGCCGA**ACC--TTA-A-  
 Nana TT**TCT**CC-GC**GCAC**ACATGT**AA**-A**TCC**-**GAACGG**ACCC-**CCACCGA**ATA--TTA-AC  
 Mcst CTC**TCT**CC-TT**GCAC**ACGTGT**AA**-A**TCC**-**CAATGG**ACCAA-**CCACCGA**ACT--TTA-A-  
 Rhox -TC**TCT**CCC-C**GCAC**AAGTGT**AA**-C**TCC**-**CAATGG**ACCTA-**CCACCGA**ACC--TTA-A-  
 Opfa CTC**TCT**CC-TT**GCAC**ACGTGT**AA**-A**TCC**-**AAATGG**ACCCG-**CCACCGA**ATC--TTA--A  
 Paar CTC**TCT**CCT-C**GCAC**AAGTGT**AA**-A**TCC**-**CAATGG**ACACC-**CCGCCGA**A--CATT-AT  
 Gozo CTC**TCT**CC-TT**GCAC**ACGTGT**AA**-A**TCC**-**GAACGG**ACCCC-**CCACCGA**AT---CTT-AA  
 Ackr -CT**TCT**CC-CC**GCAC**AAGTGT**AA**-A**TCC**-**TAATGG**ACCAA-**CCACCGA**AAA--TTA--C  
 Elev CTC**TCT**CCA-C**GCAC**AAGTGT**AC**-A**TCC**-**GCATGG**ACCAT-**CCACCGA**A--CCTTA-A-  
 Trdu GCC**TCT**CC-CC**GCAC**AAGTGT**AA**-C**TCC**-**GAACGA**ACCCT-**TCCACCGA**CCA--TTA-A-  
 Amoc CCC**TCT**CC-CC**GCAC**ATGTGT**AT**-A**TCC**-**GAACGG**ACCCC-**CCACCGA**AC---TTT-AA  
 Hame -TC**TCT**CCCTG**ACAC**AAGTAT**AA**-A**TCC**-**GAACGG**ACCCC-**CCACCGA**AAC--TTA-A-  
 Chso -TC**TCT**CC-GT**GCAC**ACGTGT**AC**-G**TCC**-**GAACGA**ACCC--**CCGCCGA**TCC--TTA-A-  
 Lyto CTC**TCT**CCC-T**GCAC**ACATGT**AC**-G**TCC**-**GAACGG**ACATC-**CCGCCGA**C--CATT-AT

Encr CTC TCT CC-CT GCAC ACGTGT AC-G TCG -GAACGG ACACC-CC ACCGA CCA--TTA-A-  
 Bvar CTC TCT CC-TT GCAT GCGTGT AC-A TCG -GTACGG ATCAA-CC ACCGA ATA--TTA-A-  
 Noco TAT TCT CC-CC GCAC GCGTGT AA-A TCG -GAATGG ACCCC-CC ACCGA ATA--TTA-A-  
 Chsp -TA TCT CCTCC GCAT ACCTGT AA-A CCG -AACCGA ACTCT-TCC GCGG A-A--ATT-AA  
 Arja CTC TCT CC-CC GCAC ACGTGT AC-G TCG -GAACGG ACAA-CC GCGGA CTC--TTA-A-  
 Pase CCC TCT CC-TT TCAC AAGTGT AAGA TCG -ATATGG ACCCG-CC ATCGT CAA--TTA-A-  
 Trel --C TCT CCG-GGCAT AAGTGT AC-G TCG -GAACGG AC-CC-TC ACCGA CAA--TTA-A-  
 Lifa -TT TCT CCCGC GCAC AAGTGT AC-A TCA -GATCGG AATAA-CC ACTGA TAA--TTA-A-  
 Acur TTT TCT CC-TG GTAT TTGTGT AA-A TCG -GGTTGG ACATC-CC GCGGA G-A--ATT-AA  
 Ampe -TC TCT CC-TT GCAC GAGTGT AA-A TCA -AAACGG ACCT-CC ATCGA ATC--TTA-A-  
 Urja CCC CCT CC-CT GCAC ACGTGT AA-A TCG -GAACGG ACCCC-CC ACCGA ACT--TTA--A  
 Enet ACC TCT CC-TG GCAC AAGCAT AC-C TCG -GAACGG ACTAA-CC CCGGA ACT--TTA--A  
 Ptbr ATC TCT CCT-GCCAT AAGTGT AA-A TCA -GATTAG ACTTA-CT ACTGA A--AATTA-TT  
 Safa -GC TCT CC-TA ACAC CTGTGT AA-A TCA -GAACGG ACCCC-CC ACTGA AAA--TTA-A-  
 Icae -TC TCT CC-TT GCAC ACGTGT AA-A TCG -GAACGA AC-C-CC ACCGA AAC--TTA-A-  
 Asmi -TC TCT CC-AA GCAC AAGTGT AC-A TCG -GAACGG ACAC-TCC ACCGA AAT---TT-AA  
 Foal -CC CCT CC-TT GCAC AAGTGT AA-G TCG -GAGCGA ACAC-CC GCGGACTCT--TAA---  
 Drze -TC TCT CT-AT ACAT AAGTGT AA-A TTA -GAACGA ACCC--AC ACTAA ACA--TTA-A-  
 Rhas -CC TCT CC-CA GCAC CTGTGT AC-A TCA -GAACGA ACC-C-CC ACTGA A-A--ATT-AA  
 Elac --C TCT CC-TA GCAC CCGTGT AT-A TCA -GAACGA ACC-C-CC ACTGA AAA--TTA--A  
 Kugu ATC TCT CC-CC GCAC ACATGT CA-A TCA -GAACGA ACC-C-GC ACTGA AAA--TTA-A-  
 Plor -CC TCT CC-TT GCAC ACGTGT AA-A TCG -GAACGA ACCC--CC ACCGA ACC---TT-AA  
 Sgun CTC TCT CCT-AG GCAC ACGTGT AA-A TCG -GAACGA ACCC--CC ACCGA G--TATTA-A-  
 Zaco CTC TCT CCT-TGCAC ACACGT AT-A TCG -GAGCGG ACCT--CC ACCG AA-TCTTA-A-  
 ZbfI CCC TCT CC-CC GCAC ACGTGT AA-A TCG -AAACGG ACCAT-CC ATCGA AAC--TTA--A  
 Spba CTC TCT CCC-TGCAT GCGTGT AA-A TCG -GAACGG ACCCC-CC ACCGA A--CATTAA-  
 Game -TC TCT ACCTT GCAC ACGTGT AA-A TCG -GAACGA ACCC--CC ACCGA AA---CTT-AA  
 Thth CTC TCT CCT-TGCAC ACGTGT AA-A TCG -GAACGA ACCC--CC ACCGA A--ACTTA-A-  
 Xigl CTC TCT CC-TT GCAC ACGTGT AA-A TCG -GAACGG ACCTA-CC ACCGA ATC--TTA-A-  
 Hyja -TC TCT C-CCT GCAC ACGTGT AT-A TCG -GCTACG AACCC-CC ACCGA AAC--TTA--A  
 Psan TCC TCT CC-CT GCAC ATGTGT AT-A TCG -AGTACG AACCC-CC ACCGA AAC--TTA-A-  
 Cupa CTC TCT CC-TT GCAC ACGTGT AT-A TCG -GAACGA ACCC--CC ACCGA AA---CTT-AA  
 Mpch CTC TCT CC-AC GCAC ACGTGT AT-A TCG -AAACGG ACACT-CC ACCGA AAA--TTA--C  
 Char T-C TCT C-CTA GCAC GCACAT AC-A TCG -GAACGG ACCCC-CC ACCGA ACA--TTA--C  
 Pser CTC TCT CC-CC GCAT AAGTGT AA-A TCG -AAACGG ACCCC-CC ATCGA TAT--TTA-AA  
 Prol -TC TCT CC-TCCGCAT ATGTGT AA-A TCG -GAACGG ACCC-CC ACCGA CTC--TTA-A-  
 Plbi CTT TCT CC-TT GCAC ATGTGT AA-A TCG -GAACGG ACCCC-CC ACCGA A-T--CTT-AA  
 Calu GCT TCT CC-CC GCAC ACCCAT AA-A TCG -GAACGG ACAAC-CC ACCGA ATA--TTA-A-  
 Papa CCC TCT CC-CAGTAC AAGTGT AA-G TTG -GCACAC GACCA-AA GCCAA CTA--TTA--A  
 SufR --T TCT CC-AA GCAC AAGTGT AC-A CCG -GAACGA ACCC--GC ACCGA ACA--TTA--A  
 Stci CTT TCT CC-AG GCAC AAGTGT AT-A TCG -GAACGA ACCC--GC ACCGA ACA--TTA--A  
 Taru C-CCT C-CAA GCAC AAGTGT AC-A TCA -GAACGA AC-CC-CC ACCGA AAT--TCA--A  
 Rala TTC TCT CC-CA GCAT AAGTGT AC-A TCG -GAACGA ACCC--CA ACCGA ATC--CTA-A-



Scca **CGA**TCCCAGAC-T-GAGGCCATC--ATAACT-TCATTTT- TTGA---CTAGAAA---ACCC  
 Muma **CGA**CCCCAGACT--GAGGTCATT--ATACTA-TT--A--AATCATTAACTAGAAAAACCTTA  
 Erca **CGA**ACCCCATAA--GAGGGAAGA--ATAATGGACATAT---ATAAATCAAGGAAAACCTAT  
 Pose **CGA**ACCCACCGG--AGGAGCAA--TAATA--CACAT-AACAAA-A-ACAAGAAAACC--C  
 Actr **CGG**ACCCAACCAA-A-GAGGGAA--ATACAG-AATAATAATAG-A-AATCAAGAAAACCT  
 Scal **CGG**ACCCAACC-A-AAGAGGGAA--ATACAG-TATAATA-ATAGA-AGTCAAGAAAACCT  
 Posp **CGA**CCCA-CCAA--AGAGGGAA--ATNCRG-AATACCAATG-AACTCAAGAAAA-CCTG  
 Atsp **CGA**ACCCAACCAA--AGAGGGCA--GTA--TTCACACAAACCCCAA-ACAAGAAGA--ACT  
 Leoc **CGA**ACCCAAC-CA-AAGAGGGCA--AT-ATTTATAT-ATCCTAAA---CAAGAAAAGCTTA  
 Amca **CGA**ACTCACACA--AAGAGAGAA--TTACAC-AAATA-GCACGACATACTAGAAGACCCCTG  
 Osbi **TGA**ACCCAACCAA--AGAGGGCA--TTA--CAGACCAAAAA-CTAT-CCTAGAAAATCCTG  
 Pabu **AGA**ACCCAATCAA--AGAGGGAA--TCACAAT-ATAAACATAAACA---AGAAAAACATG  
 Hial **CGA**ACCCAACA-A-AAGAGGGAA--GCACAA-G--ACAC-AACATAACCAAGAAAAATCTG  
 Elha **CGG**ACCCAATAC--AAGAGGGAA--ATGAAA-CAAAAACCAAACCAAGAAGAA---GCTA  
 Mlcy **CGG**ACCCAAA-CC-AAGAGGGAA--ATGCA--ACAAACA-CCAATAACCAAGAAAAAACT  
 Algl **CGA**ACCCAAACAG-A-GGGGCGT--GTAGAA-CAAACGATAAC-----CTGAAAAATCTTA  
 Ptgi **CGA**ACCCAGATA--AAGAGGGAA--ACGCAGAAAACAA--ACAACACCAAGAAATACCTA  
 Alaf **CGA**ACCCTAAC--AAGAGGGCA--TCATCTTCAATAAACACAA--ATCAGGAAAACCCC-  
 Nock **CGA**ACCCTATGATA-A-GAGGGAA--TCATTTTATGATAATTGAG-ATCAAGAAAACCCAA  
 Anja **CGG**ACCCAACAG--AGAGAAAA--GAACAACTACAAAA-ACAAGAAAAAT--CTATT  
 Gyki **CGG**ACCTAATA-----GAAGGCA--AAGCAA-AG-GAAA-AATAACATACAAGAATTCCAT  
 Syka **CGA**ACCCAAA-AAT-GAGGGGACA--ACAACA-ACCTA-CAA-TAAAACAAGAAAACCTG  
 Opma **CGG**ACCCAGACC-C-TGAGGGAAA--AACAAT-TGAACAAATAA---CAAGAAGATCTTG  
 Comy **CGG**ACCCAAA-A--AAGAGGGTA--AAACAA-C-AAA-ACTCAATAACAAGAAAAACCTA  
 Sasp **CGA**ACCCAGTAAT--ACTTGAGGG--CCAAGTAGAAGGT-ATTATTGTATCTAGAAAATTC  
 Eupe **CAG**C-CCCAGAA--GAGAGTAA--ACAACA-AACAC-CATAACGCAAGAAAATACTGTCA  
 Enja **CGA**ACCCAACAA--AAGAGGGCC--CTACACACCCGCC-ACCTCTGACCAAGAAAACTATG  
 Same **CGA**ACCCAATAA--AGAGGGTA--TTACATC-ACTGCCATCCCAGGCCAAGAAAACCATG  
 Chch **CGA**ACTCAATCA--AAGAGAGCA--GTGCGA-AGTTA--AAAAGAGACCAGGAAGGCCCCG  
 Grgr **CGA**ACTCAACT-C-TAGAGAGCA--CTGTGG-TTCCCAACAAAAACAG---AAAAACCC  
 Caau **CGA**ACTCAACCC--AAGAGAGCA--ATGTGG-TATTA-CAAAAAA-CCTAGAAAAAC--C  
 Cyca **CGA**ACTCAATCA--AAGAGAGCA--ATGTGAATTACAA-AA---AAACCAAGAAAAATCCA  
 Dare **CGA**GCCCAAC-A-AAGAGGGCA--ATGTGA---GTTA-AAAACCTGA---GAAAAATCCA  
 Cost **CGA**GCCCAATAA--AAGAGGGTA--ATATAACTAA---TATAAATTACAAGAAAATCATA  
 Leec **CGA**ACCCAGA-AAA-A-GAGGGCA--GTGT-T-GACAA-TAAAAAATCAAGAAAACCCCA  
 CrIa **CGA**ACCCAAAA--A-AAGAGGGAT--GCATG-----GAAGACAAAAACCAAGAAAACCCC  
 Clmc **CGA**ACCCACCCCA-A-GAGGGAA--AAATGA-TATATAATAAAAC-CAAG-AAAAACCCAC  
 Phin **CGA**ACTCACCCAA---GAGAGTAATGT-TCCAAAACCATAA-ACAAGAAAAC---CCCA  
 lcpu **CGA**ACCCAATT-A-AAGAGGGCA--TTATG--GTTATA--TTAAATATC--AAGAAATCTC  
 Psto **CGA**ACCCAATC-A-AAGAGGGAA--ATGTGA-ACACCTA-AAAC--ACCAAGAAAACCTCA  
 Cora **CGA**ACCCAATAC-AAGAGGGAA--ATGTGA-GCCAAAT-AAACAA--CAAGAAAACCTCA  
 Eisp **CGA**ACCTAATCA--AAGAAGGCC--ACGTGGCCTAATA-CA-ATTAACCAAGAAAACCCCA  
 Apal **CGA**ACC-CAACCA--AAGAGGGCA--TTGTGA-CCTC--AACAAATAACAAGAAAACCCCA  
 Eslu **CGA**ACCCAACC-A-AGAGTGTAT--TGTA-----AC-CCAA--ACAAGAAAATCTA  
 Dape **CGA**ACCCAAAACA--AGAGGGCC--TTGTAAT-----AATCACAAGAAAAATTTA  
 Glse **CGA**ACCCAAAAA--AGAGGGTA--ATA--CAA-CTAAGTAAT---ACTAGAAAAACAG  
 Naar **CGA**ACCCAACA-C-CAGAGGGAA--ATACGA-ATTAATAAATAATG-CTAGAAAAACAG  
 Baoc **CGA**ACCCAGAAA--AAGAGGGTA--ATATGA-GCCAAATAAATGCTAGAAAAA---CACA  
 Opso **CGA**ACCCAATAT--AAGAGGGTA--ATACA--AACCA-GAAAAACTGCTAGAAAAACAG  
 Alte **CGA**ACCCAACCC--AAGAGAGCA--CTGTGG--ATTTA-AACACA-ACCTAGAAAACCCCA  
 Plap **CGA**ACCCAACCC--AAGAGAGCA--CTGCGGATTTAAA-TA---TAGCCTAGAAAAGTCCCG

Plal **CGA**ACCCAACCCT - -AGAGGGGAA - -TTTGGACTGAATT - -ACAA - - - -CCAAGAAAACCTC  
 Sami **CGA**ACCCAATGC - -AAGAGGGAA - -CTTTGG - - -ACT - TTAGCGCAACCAAGAAGCGGCCA  
 Rere **CGA**ACCCAAGTGT - TAGAGGGAA - -ATTCA - -AGCTTAA - CTA - GAAACGAGAAGAGCCTG  
 Gama **CGA**ACCCAATTG - -AAGAGGGAA - -AAACGGACTAAGC - - -TGACCA - CCGGAAGGTCCCG  
 Onmy **CGA**ACCCAACCA - -AGAGGGAA - -CTGTAGGCC - AGA - -ACAAACACCAAGAAAAACCTA  
 Sasa **CGA**ACCCAAGCCA - -AGAGGGAA - -CTG - -TAGCCCAGAAC - AAATACCGAGAAAAACCTA  
 Cola **CGA**ACCTAAACC - -AAGAGGGAA - -ATGCAG - GCCAGAAGAGAAAC - -CGAGAAAAGCCTA  
 Dita **CGA**ACCCACCCC - -TAGAGAGAA - -CTTCGG - ACCAA - ATCAGTTAACCAGGAAAA - ACCC  
 Gogr **CGA**ACCCAAAC - C - TAGAGGGAA - -TCATAA - ACTATA - -C - - -ACAACCAAGAAAAATCCT  
 Chsl **CGA**ACTCAAAC - -CAGAGAGCAGTCTGACCAGGGTTT - - -CACACAAGAAGA - - - -CCCC  
 Atja **CGA**CCCCAAACA - -AAGAGGGAA - -ATGAAT - AAAAT - AAATGTAA - ACAAGAAATACACT  
 lido **CGA**CCCCAAAACAACAGAGGGAA - -ATGAAC - AAGACTAAATATA - AACAAGAAAAACACC  
 Auja **TGT**ATCTA - -CA - -AAGAAGCAA - -CTGTGG - -CCTAAACCTATA - AACAAGAAAAACCCCA  
 Chag **CGA**CCCCAACCCC - -AGAGGGAA - -TTGAGCTTAGCCACAGTTTAA - ACTAGAAGAACT  
 Hami **TGG**ACCCAGA - - - -AGAGGGTA - -CTATGAA - ATAAA - - -AAATAAAGTAGATAAAACCA  
 Saun **TGG**TCCCAAAAAGA - -GGGCACTG - TGGAAAAAACTAATA - AACTAGATAA - - - - -AACCA  
 Nema **CGA**CCCCAACCC - -AAGAGGGCA - -GTGTAAGACCAC - - -ACAAATACCTAGAAAAACCCAA  
 Disp **CGG**TCCCCATC - C - GAGGGCCA - - - -TGTAT - TACTACA - CGAAT - ACCTAGAAACCTCAA  
 Myaf **CGA**CGCCCCAAA - -GAGGCTACT - -GTTA - A - ACCACACAAAAACCAAGAAAAAT - CTAACA  
 Lagu **CGA**CCCCACCC - C - CAGAGGGCA - -CTGAAC - CC - CAA - -CCAAACAACCAGAAGATCGTT  
 Trtr **CGA**CCTCAAC - AT - CTGAGATGA - -ATGGAATGAAT - ATAAAGTA - - -CTAGAAAAGCATC  
 Zucr **CGA**CCTCAAACC - GCAGAGGTG - -ATTGGG - AA - GTAA - -CTTGATTTCTAGAAAAGCCCC  
 Pxja **CGG**CCCCAAA - TA - AAGAGGGAA - -ATGTATAATAA - ATAAACTA - - -CTAGAAAAATATA  
 Pxlo **CGG**CCCCAAATA - -AAGAGGGAA - -ATGTA - - -TAATA - AATAAACCACTAGAAAAATATA  
 Pctr **CGG**CCTCAAACA - -AAGAGAGCC - -CTGCAC - AAAA - -CAC - AGAATACAAGAAAAACGTG  
 Apsa **CGA**CCTCACAAC - -CAGAGAGTA - -CTACAA - AAT - - - - -ACTAAACAAGAAAAATTTG  
 Cabe **CGA**CGCCAAT - AC - AAGAGGCAA - -CTGGGCCACGA - ATTAACAC - -TTAAAAGACCACC  
 Bzze **CGA**CCCCAAC - CC - AAGAGGGCA - -TTGAGTAATAA - ATTAACAA - -CTAGAAGAACT  
 Siim **CAA**CCCCCAC - CA - AAGAGGGCA - -CTGGGTAACAA - ACCAAACAA - -CAAGAGAACTACC  
 Ctru **CGG**CCCCAACCC - -CAGAGGGTA - -ATGAAT - -GAAAATAGGAC - -AACAAGAAAAACCAT  
 Dpbr **CGG**CCCCAACCC - -CAGAGGGTA - -TTGAAT - AA - GA - -ATAATACAACAAGAAAAACCAT  
 Caki **CGA**CCCCAAC - C - TAGAGGG - A - -CT - - - - -TAAGT - TAAAA - AACAAGAAAAACCACT  
 Phja **CGA**CCCCAAC - C - AAGAGGGCC - -ATAAC - T - - - - -ATCTA - AACAAGAAAAACCAT  
 Brsp **CAG**CTCAAT - - - - - -AGAG - -GAACCTAAGGCAATCA - ACTAGAAAA - - - - -CCCCT  
 Gamo **CGA**CCCCAACCC - -CAGAGGGTA - -ATAGGT - CAAAAAAC - - - - -AAGAAAAACACC  
 Lolo **CGA**CCCCAACCC - -CAGAGGGAA - -ATAAGAAACA - - - -TTTAA - - - -CAAGAAAAACACT  
 Batr **CGA**TCCTATAAT - -AGAAGGCACCAGCCTAAAAATAAATACTACAAGCTC - - - - -CCCCC  
 Prmy **CGG**CCCCAA - CA - - - -GAGGGTA - -ATGAAT - ACTACAT - AAACA - -ACTAGAAAAACAAA  
 Loli **CGG**TCCCAACCCA - -AAGAGGGCACTGAATAAAAAACAGAAAGACCAGAAAAA - - - -TATT  
 Loam **CGG**CCCCAAAAG - -AAGAGGGAA - -CTGAGCAAAAAAT - AA - - -AAAACCTAGAAAAACACC  
 Chab **CGG**TCCCAAA - CA - AAGAGGGTA - -GTGAG - -AAAGACA - CCAA - AAACCTGAAAAACCCC  
 Chto **CGG**CCCCAAC - A - AAGAGGGTA - -GTGAGA - AAGACA - -CCA - AAAACCTGAAAAACCCC  
 Majo **CGG**CCCCAACCA - A - AAGAGGGAA - -GTGAGA - ACAAAC - AGAT - -AACAAGAAAAATTA  
 Hlst **CGG**TCCCAA - GAA - TAGAGGGCA - -ATTA - AATAATTAATAAAT - -ACTAGAAAAATTTT  
 Clpe **CGG**CCCCAACCAA - - -AGAGGGCA - -CTGAGA - AGGG - -AATAAAGGACAAGAAAAACCT  
 Mlmr **CGG**CCCCAACCC - A - AAGAGGGCA - -ATGTCC - AA - GGAA - CCAAATAACAGGAAACCCCC  
 Crcr **CGG**GCCCCAACCA - -AGAGGGCA - -TTG - - -AATAGAA - GACCTCACACTAGAAAACTATC  
 Muce **CGG**GCCCCAACCC - -AAGAGGGCA - -TTGAATAGAAGAC - - -CTCACACTAGAAAAAC - TATC  
 Bege **CGG**CCCCAATAAA - A - GAGGGAA - -TTAGGC - TATAAAACAAA - G - AACTAGAAAAACACC  
 Mela **CGG**TCCCAT - AC - -TGAGGGTA - -ATA - - -GGCCAAAAATA - GAGA - ACTAGAAAGACCACC  
 Hats **CGG**CCCCAAA - AA - AAGAGGGAA - -CCGACCATAA - AC - AAAAAA - -CTAGAAAAACACC  
 Orla **CGG**CCCCAATT - A - AAGAGGGGA - -GGCCGG - AT - GGAA - AAGAGAA - CAAGAAAAATTCG

Cosa **CGA**CTCCAAATA--AAGAGGATA--TTA-GA-T-TAT-ATATAAAGAAGCTAGAAAACTCTC  
 Exsp **CGG**CCCCAAGCA--AAGAGGGCA--TTGGAA-AATTA-AATAGACA-CTAGAAAACTTC  
 Depa **CGG**CCCCAAATA--AAGAGGGTA--TTACAAAAAAT--ATAA--AACAGAAAACTTG  
 Rima **CGG**CCCTAGCT-G-AAGGGCTTA--TACTAC-ACAAAATCACTAG-----AAACCCCTA  
 Fuol **CGG**CCCCAACC-A-AAGAGGGAA--TTAGAG-CTAAAAC-AGAA--AACAGGAAATATCTC  
 Gmaf **CGG**CCCCAAT-A-A-GAGGTTA--ATAAGA-CC-CAA--AAAGATAACAAGAAACCCCT  
 Xeei **CGG**CCCTAATAA--AAGAAGGAA--ATAGAG-TAAAA-ATAAATA--ACAAGAAAACTC  
 Pros **CGG**CCCCAATC-A-AAGAGGGGA--CTGAAT-AATAAA--TAA-AATCCCAGAAAAATATT  
 Scmi **CGG**ACCCAATCAA-A-GAGGGTA--TGAAAG-AGACGAGTAGCCC-CCAA-GAAAACCAT  
 Rolo **CGG**CCCCAACC-A-AAGAGGGAA--TTGAAT-AATAA-A-CTAGA-GTACTAGAAAGACAC  
 Cere **CGG**CCCCAATTAG-TAGAGGGTA--GTGAACACTAA-ACAAAACAC--T-AGAAGACGTT  
 Daga **CGG**CCCCAACA-G-CAGAGGGAA--ATGAAC-A--ACA-ATTATAAACTGGAAGTGC GTT  
 Anco **CGG**CCCCAAACAA--AGAGGGAA--ATG--ACA-ATAAACATAA-CTAGAAAAACT  
 Dmve **CGG**CCCCAACCAA--AGAGGGAATTGAAAGATAAAAGTAATAAACCCAGAAAAAT---CACT  
 Dmar **CGG**CCCCAA-TCA-CAGAGGGGA--GTGAAC-AGTAAACAACAAA--CTAGAAGACCACT  
 Anka **CGA**CTCCAACCAA-A-GAGGCTA--ATGAAA-AATAAAATCATAA-ACCA-GAAAACCAT  
 Moja **CGG**CCCCAATCA--AAGAGGGAA--ATGAAA-TTCAA--AACTATAAACAGAAAGACCAT  
 Hoja **CGG**CCCCAACCA--AAGAGGGAA--ATGAAA-AACAA--AACCACAAACCAGAAAAATATT  
 Bede **CGG**CCCCAATCA--AAGAGGGTA--TTGAATAATAAC-CACAAA--ACTAGAAAAACATT  
 Bosp **CGG**CCCCAATAG--AAGAGGGTA--TTGAAT-A-ATA-AACCATAAACTAGAAAAACATT  
 Mysp **CGG**ACCCAAAA--AAGAGGGAA--TTGAGC-AACAA-ACCT-GTAAACAAGAAAAACT  
 Osja **CGG**ACCCAACCA--AAGAGGGAA--CTGA--ACAATAA-ACCAGCCAACCAGAAAAACT  
 Sgro **CGG**ACCCAAA-AA-AAGAGGGAA--CTGAGC-AAACAAA-GCAATAAACCCAGAAAGAACT  
 Pzpa **CGG**CCCCAAGAAA--AGAGGGAAGTAAAACTAGCTAAATTAACCAGAAGA---CCTTT  
 Zeja **CGA**CCCCAAACA--AAGAGGGAA--GTGTAG--ACTAACCCAGCCAACTAGAAGCCCTA  
 Znne **CGA**CCCCAAAAA-A-GAGGGAA--GTGAAA-TCTATGCCCAA---ACTAGAAAACTTT  
 Zefa **CGA**CCCCAACAA--AAGAGGGAA--GTGAA---ATA-TGTGCCCAACTAGAAAACTTT  
 Acni **CGA**CCCCAAAAA-A-GAGGGAA--GTGAAA-ATTAATAGACCAA-ACTA-GAAAACCTTT  
 Ncrh **CGA**CCCCAAAA-T-AAGAGGGAA--GTGA-A-AATTAAT-AGACCAACTAGAAAACTTT  
 Agca **CGG**CCCCAAACA--AAGAGGGTA--TTGAAC--TACAAATAAAC-AACTGGAAGACCCCC  
 Hydy **CGA**ACCCAAC-AAA-A-GAGGGAA--TTGGAT-AACAA-ACCAAACAAGAAAACTATC  
 Gsac **CGA**ACCCAACCA--AAGAGGGAC--CTGGGT--AATAAACTAAAT-AACTAGAAAACTACC  
 Pevo **CGG**ACTCAAAC-A-AAGAGAGCC--CTGGGC-TC-TATC-ACAAAAACAAGAAAAACC  
 Hiku **TGG**TCCCACTAC--CAGAGGGTA--ATGTTG-TAAAA--GCAAAGGAACAAGAAAAAGCAA  
 Inpa **CGG**CCCCAAACCC--AGAGGGCA--TTAAACC-CCAA--ACAGACAAGTAAAAACCAAC  
 Auch **CGG**CCCCAAAAC--CAGAGGAGA--CTGATCATTAAT-CTCAACCCACAAGAAAAACCCCT  
 Fico **CGG**CCCCAACAA--AAGAGGGAA--TTGGGC-AATCA-GCACAATCGCCAAGAAAAACCCC  
 Macs **CGG**CCCCAATCAC--AGAGGGAA--CTGAACAAT-AAA--CAAAACAAGTAAAAACACC  
 Moal **TGG**CCCCAAAA--AAGAGGGGA--TTGAAT--AACTAATAGATT-A-CTAGAAAAACAAC  
 Syma **TGG**CCCCAACAA--AGAGAGCC--CTGA-TAACCTAAAC-AGATAACTAGAAAACTAAT  
 Mafr **CGG**CCCCAATTA--CAGAGGGTA--ATGAAC-ACTA--AACCACTACACCAGAAAAACCACC  
 Dcpe **CGG**CCCCAAC-A-CAGAGGGCA--ATGAAC-AA-AAA-C-AGAAAACCGAAATTCACC  
 Dcti **CGG**CCCCAATC-G-TAGAGGGTA--ATGAAC-AAAAAGC-AGAAA-ACCAGAAATTCACC  
 Hehi **CGA**CCCCAACG--AAGAGGGCC--CTGAACAACAACC--CAAACAACCAGAAAAAATT  
 Stam **CGG**CCCCAATAA--AGAGGGTAATGAATTATGGTATAG--ACAAGTAAAAACCTCCAA  
 Hogi **CGG**CCCCAGACAA-A-GAGGGAA--CTGAGC-AACAACCTAAAGA-ACTA-GAAAAACT  
 Erzo **CGA**CCCCAAGCA--AAGAGGGCC--CTGAAT-AATAGACCAAACAA--CTAGAAAAACATT  
 Hxot **CGG**CCCCAAATA--AAGAGGGCA--GTGGAT-GTTAGACCAAAAA--CTAGAAAAATATC  
 Core **CGG**CCCCAAC-A-AAGAGGGCA--TTGGAC-AACAAA--CCAAACAAGTAAAAAGCCTT  
 Apve **CGA**CCCCAATAA--AGAGGGCACCGGATCACAACCAAAAA-CTAGAAAAAT---TATC  
 Latj **CGG**CCCCAACAA--AGAGGGAA--TTGAAA-ACAACACAACAT-CTAGAAAAACCACC  
 Laja **CGA**TCCCAAAC-A-AAGAGGGTA--CTGAAC-GATAAC-CGGAT-AACGAGAAAACTATT

Syja CCG CCCCCAAAACAA - A - GAGGGAA - - CTGAAA - AACTAAACCAGAG - ACCAGAAAAACATT  
 Epme CCG ACCCAAATAA - TAGAGGGAA - - CTGAACC - ACAGACGAAACA - - ACTAGAAAACCACC  
 Grse CCG CCCCCAACCTATCAGAGGGAA - - TTGA - TGGACATAAACCAAACAACCTAGAAAAACACC  
 Clja CCG CCCCCAAGC - C - AAGAGGGTA - - CTGAAC - C - AAGTACATAGATAACTGGAAAAACCGTT  
 Ogcy CCG CCCCCAAC - A - AAGAGGGTA - - TTGAAC - AATAAACCAAACAACCA - - - GAAAAATTC  
 Plna CGA ACCCAAACA - - AAGAGGGCA - - CCGAAC - AACAA - ATAAACC - - CCTAGAAAACCATT  
 Lema CCG ACCCAAAA - CA - AAGAGGGCA - - ATAGA - - TGGCAGA - CTAACAACCTGAAAAACAT -  
 Etzo CCG CCCCCAATC - T - AAGAGGGAA - - CTGAGC - AACAGA - - CCAAACAACCAGAAAAACATT  
 Apse CCG CCCCCAAGA - - A - AGAGGGGAAC - - TGAAT - ATTATGGCCAGGCCACTAGAAGACCATC  
 Epde CCG CCCCCAAACAA - - AGAGGGCACTGAACAACAACCCAGATAA - CCAGAAAA - - - - CATC  
 Slja CCG CCCCCAATAA - - AAGAGGGAA - - ATGAAT - AACCA - - TACAAACAACCTAGAAAAATTAT  
 Bsja CCG CCCCCAAACA - - AAGAGGGAA - - TTGGAC - ATACA - AACCAAACAACCAGAAAAACGTC  
 Ecna CCG CCCCCAAACAA - - AGAGGGCA - - TAAA - C - ATCATCTTAAAACCACTAGAAAAACCGTT  
 Cohi CGT CCCCCAAAAA - - AGAGGGAA - - TTG - - - AGTACTTTAGAAAACCTACAAGAAGACTACT  
 Caar CCG CCCCCAAACAAA - GAGGGAAC - GGACAA - ACGCA - - CAAATTACACTAGAAAAATCGTC  
 Came CCG CCCCCAAACAA - - AGAGGGTATTGGACAAACGTACAAATACAAAACCTAGAAAAATCGTCC  
 Mema CGA CCTCAAAA - CA - AAGAGAGCA - - CTGAAAAACAA - ACCAAACAAA - CTAGAAAACCATC  
 Lenu CGA CCCCCAAACTAA - AAGAGGGTA - ATGAAC - AA - AA - - CCCAAAACCTAGAAAAAAGTT  
 Brja CCG CCCCCAAACA - - AAGAGGGCA - - ATGGAC - AAGA - - AATAAAGA - GCCAGAAAAACGTC  
 Plma CCG CCCCCAAACGA - - AGAGGGTAATGAACAACAATAAACAACCAGGAAA - - - - - CCATC  
 Emst CCG CCCCCAA - ACA - AAGAGGGTA - - CTGAAC - AACAGACCAAACA - - ACCAGAAAAACATC  
 Ptti CCG CCCCCAAACA - - AAGAGGGTA - - CTGAAC - AACAG - ACCAAACA - ACCAGAAAAACCACC  
 Losu CGA CCCCCAATCAA - CAGAGGGCA - - CTAGAT - AACTTTAACCTAATAACAAGAAGAACATC  
 Geoy CGA ACCCAATCA - - AAGAGAAGA - - ATGA - - AAGTCCC - GAAAAGAAGCAAGAAAAATTATT  
 Dipi CCG GCCCAAACA - - AAGAGGGCA - - TTAGGCAACTAAC - - AAAAC - AACTAGAAAAACACC  
 Pama CCG CCCCCAAG - CA - AAGAGGGAA - - ATGGATTTCAA - ATAAATTA - - CTAGAAAAACATC  
 Leob CCG CCTCAACA - - AAGAGGGCA - - CTGAAG - AATGA - AC - TAGACAACCTAGAAAAACATC  
 Neba CGA CCCCCAAACA - - CAGAGGGAA - - TTGAAC - TACTACTCCTACCTTTCAAGAAAAACTTT  
 Pdpi CCG CCCCCAAC - A - AAGAGGGAA - - GTTGGT - AT - GAAT - TTAAGAACTAGAAAAACCACC  
 Nimi CCG ACCCAAACAA - - AGAGGGCC - - TTG - - - AACAACAACCCGCCAACCTAGAAAAACACT  
 Uptr CCG CCCCCAACA - A - AAGAGGGAA - - GTGAGA - AA - TAA - - ACAGATAACAAGAAAAATTACT  
 Pesc CGA CCCCCAAACCA - A - GAGGGTA - - CTGAAC - AA - TACT - CAAAATTACAAGAAACCCCCC  
 Baar CCG CCCCCAAACAA - - AGAGGGCA - - CTG - - AATG - ACATACCACAATACCAGAAAAACCATT  
 Moar CCG CCCCCAAACAAAGA - - GGGTAATGAACAACAACCAAAC - - - - AACCA - GAAAATCATC  
 Toja CCG CCCCCAAA - CA - AAGAGGGTA - - CTGAA - - TAACAAT - ATAACCCACTAGAAAAATCATT  
 Chau CCG CCCCCAAGCAA - - AGAGGGCA - - TTGGGCT - ACAAC - CTTAAACGTCTAGAAAAGCCCC  
 Chse CCG CCCCCAAACAA - A - GAGGGAA - - CTGAAC - AGCAAATAAACA - ACTA - GAAAACCGTC  
 Enar CCG CCCCCAAA - TAA - A - GAGGGTA - - ATGAACAACA - ATTAAC - AACTAGAAGAACATC  
 Hpty CCG CCCCCAAAATA - AAGAGGGTA - - CTGAAC - AA - CAAA - CCAAATAACCAGAAAAACATC  
 Nana CCG CCCCCAAGACA - AAGAGGGAA - - CTGAAA - AA - CAAA - ATAAAATACAAGAAAAACCCC  
 Mcst CCG CCCCCAA - AAA - AAGAGGGAA - - CTGAAC - AACAGACCAAACA - - ACCAGAAAACCACT  
 Rhox CCG CCCCCAAACA - - AAGAGGGTA - - ATGAAT - A - CCA - AACTAAACAACCAGAAAAATCACT  
 Opfa CCG CCCCCAAA - CA - AAGAGGGAA - - TTGAACAGCAA - ACCAAACA - - CCAGAAAAACCACC  
 Paar CCG CCCCCAAACA - - AAGAGGGCA - - TTGAA - CAAACA - ATCAAACAACCTAGAAAAACAAT  
 Gozo CCG CCCCCAAACAA - - AGAGGGTA - - TTGAACA - ACAA - - - CACACAACCTAGA - AAAGCGT  
 Ackr CCG CCCCCAAAA - A - AAGAGAGCA - - ATGAGC - CTTTCA - - CTATAGAACAAGAAAATACCCT  
 Elev CCG CCCCCAAACA - - AAGAGGGTA - - TAAATCATAGC - - - - ACAG - - - - - GAAAACCTATT  
 Trdu CCG CCCCCAAAAC - A - AAGAGGGCC - - CTAGGC - A - AAAA - ACAACAACCTAGAAAAACCCC  
 Amoc CCG CCCCCAAGCAA - - AGAGGGTA - - CTGTGTA - AAA - - - TAAATAACAAGAAAAACCCCA  
 Hame CCG ACCC - AACAA - - AAGAGGGCA - - CTGGAC - CGTA - CACATCAAACCAGAAAAACTC  
 Chso CCG ACCCAATACA - - AAGAGGAA - - ATAGGGC - CACACG - ATAGAGAACAAGAAAA - ACAC  
 Lyto CCG CCCCCAAACA - - AAGAGGGCA - - CTGAATAACAGAT - - - CAAACAACAAGAAAAAGCATT

Encr CCGGCCCCAATCA--AAGAGGGCA--CTGAAT-AATAG-ATTAACA-ACAAGAAAAGCGTT  
 Bvar CCGGCCCCAAACA--AAGAGGGCA--TTGGAT--AATAAACCAAAC-AACCAGAAAATTACC  
 Noco CCGGCCCCAAATAC-A-GAGGGCA--ATGGAT-TATAACCCAAA-C-AACAAGAAAATCCTC  
 Chsp CCGGCCCCACCA-A-ACGAGGGCC--CTGTAC-AACAT--CTTAATTACAAGAAAACACCC  
 Arja CCGGCCCCAAATA--AAGAGGGTA--CTGGAT-CATAG-ACCAAACAAGTAAAAATATCC  
 Pase CCGGCCCCAAATTAAGAGGGCA--ATGGGCATTATACTAAACAA--CAAGAAATACCCC  
 Trel CCGGCTCAAACT--GAGAGAGTA--ATGAGC-TACAT--TGTGTTTATCTAGAAAAGCCACT  
 Lifa CCGGCCCCAAGCA--AAGAGGGCA--TTAAAC-T-AAA-AAGAGAATAACTAGAACTGCATC  
 Acur CCGGCCCCCCCTCAC--AGAGGGCC--ATGAAAAATTAAC--CTTAACCACTTGTTAACCTTT  
 Ampe CCGGCCCCAACCA--AAGAGGGAC--ATGGAC-AA-CAA-CCAAACAACCAGAAAACCATC  
 Urja CCGGCCCCAAACAA-A-GCGGGAA--CTGAAT-ATTAACCTAACA-ACCA-GAAAACCATT  
 Enet CCGG-CTCCACTA--TTGAGGACA--CTGCAC--ATCTA-AACTATAACAAGAAAACCTT  
 Ptbr CCGGCCCCA-AA--AAGAGGGTA--ATG---ATTTATT-AATAAAAAACAAGAAAATA-A  
 Safa CCGGCCC---CAA-AAGAGGGTA--ATGGCCTA-GA--AAAAGAGAAGTAAAAACCCC  
 lcae CCGGCCCCAAAC-A-AAGAGGGTA--ATGAAC-A--ATAA-GTAAGCAACCAGAAAACCATC  
 Asmi TGC CCCCCAACCA-CAGAGTGAA--CTGA--AATATAA-CTACAAAACAAGAAAAATCTC  
 Foal CCGGCTCCAAACAA-AGAGGGCCT--TGGGC--CTATCATAACAA--CTAGAAAACCGCC  
 Drze CCGGCCCCAAGCTA-AAGAGGGTA--ATGTGC--CAAAA-ATAACCAACCAGAAATATACA  
 Rhas CCGGCCCCAATC-A-AAGAGGGCC--TTGAGC-CGAAGCAGACTAA-ACTAGAAGATCGCT  
 Elac CCGGCCCCAATAAA-AAGAGGGTA--ATGAAC-CAAAAAGCCCGTG-AACCAGAAGCCCTT  
 Kugu CCGGCCCCAAACAA-A-GAGGGAA--CAGAGT-AATAACTGAAA-TACCAGAAAAACACC  
 Plor CCGGCCCCAAAATA-AAGAGGGTA--TTGAA--CAACAA-CCTGCTAACTAGAAAATATT  
 Sgun CCGGCCCCAAACA--AAGAGGGAA--ATGAACAACATACCAAACGACTAGAAAACCACTCAA  
 Zaco CCGGCCCCAAACA--AAGAGGGCA--CTGAACAACAGACCAAAC--AACAGAAAACGTC  
 Zbfl CCGGCCCCAAAC-A-AAGAGGGAA--CTGAAC-AACAAAT-TAAAG-AACAAGCAAACCATC  
 Spba CCGGCCCCAAGCA--AAGAGGGCA--TTGAA--GAATTA-ATCAAACAGACCGGAAAACCT  
 Game CCGGCCCCAAACAA--AGAGGGCA--ATGAACATA-TAA--GTAAGCAACCAGAAAATCATC  
 Thth CCGGTC CCAAACA--AAGAGGGCA--ATG-AACAACAAG-TA-AGCAACA-GAAAACCATC  
 Xigl CCGGCCCCAAACAA--AGAGGGCACTGAAAAATGACCCAAGCAAACCAGAAAAC---CATC  
 Hyja CCGGTC CCAAACA--AGAGGGCC--CTG---ACAACA-AGTAACCAACTAGAAAACATC  
 Psan CCGGCCCCAA-ACA-AAGAGGGAA--ATGAAC-AGCAAGTAAGTA--ACCAGAAAACCATC  
 Cupa CCGGCCCCAAAC-A-AAGAGGGTA--ATGAAC-AA-CAAG-TTAGACAACCAGAAAACCATC  
 Mpch CCGGCCCCAAA-CAA-A-GAGGGAA--TTGAATGATAA-ATTAAC-AACAAGAAGACCATT  
 Char CCGGCCCCAAACAA--AGAGGGCA--ATG---CACAACC-AACAACAACCAGAAAACCCC  
 Pser CCGGCCCCACACC--AAGAGGGCA--TTAGGA-AGCAA-ACCAAGTGAACAAGAAAATCGCC  
 Prol CCGGCCCCAATC-A-AAGAGGGAA--CTGGAA-AATGTCA-TCGATTGACTAGGAAAACATC  
 Plbi CCGGCCCCAATC-A-AAGAGGGTA--TTGGAA-ATCACCACAAATTTAGGCCAGAAAACAT  
 Calu CCGGACCCAAAACA--TAGAGGGCC--CTGGGA-AAC--AGCAAATGAACTGGAAGACCACC  
 Papa CCGGCCCCAGA-CAA-AAGAGGGCA--CTGAA--AACAAAATAAAGAACAAGAAACTTT  
 Suf r CCGGCCCCAACCAA-A-GAGGGTA--GTG-AT-AATAAAAAAGA-T-AACAAGAAAACGCT  
 Stci AGG CCCCCAA-CTA-CAGAGGGAA--ATGAA--AATGTTTTACAAA-TACAAGAAAACAAT  
 Taru CCGGACCCAACCAA--AGAGGGAA--ATA--AATATTA-AACTACAACAAGAAAACATT  
 Rala CCGGCCCCCTACAC--AAGAGGGTA--TTGAAC-TACAA--ATTAACAAGTAAAAACCCC

|      | 29'           | B'   | 30   | 30' | 27'   | 26'     | 31                   |     |
|------|---------------|------|------|-----|-------|---------|----------------------|-----|
| Scca | TATCTTACTAT-- | TCGT | TAAC | CCA | ACACA | GGAGTGT | CT-----TAAGGAAAG-AT  | TAA |
| Muma | TTCTTCT---AT- | TCGT | TAAT | CCC | ACACA | GGATGT  | CAC-----C-AGGAAAG-AT | TAA |
| Erca | TAT---A-TTTAC | TCGT | TAAC | CT  | ACACA | AGGTGC  | ACA-----AAGGAAAG-AC  | TAA |
| Pose | TATTAACCTCA-  | TCGT | TAAT | CT  | ACACA | AGGTGC  | -CCA-----AAGGAAAG-AC | TAA |
| Actr | GTA AACACA-A- | CCGT | TAAC | CCA | ACACA | GGAGTGC | ACCG-C-C-AAGGAAAG-AC | TAA |
| Scal | GTA AACACAA-  | CCGT | TAAC | CCA | ACACA | GGAGTGC | GCCA-C--CAAGGAAAG-AC | TAA |
| Posp | TAA AACACAA-- | CCGT | TAAT | CCC | ACACA | GGAGTGC | TCAC----CAAGGAAAG-AC | TAA |
| Atsp | TATTGAATATAAA | TCGT | TAAT | CT  | ACACA | AGATGC  | CC-----ATGGAAAG-AC   | TAA |
| Leoc | TTAAATATT--AA | TCGT | TAAC | CT  | ACACA | AGATGC  | AC-----ATGGAAAG-AC   | TAA |
| Amca | TAATAA--CTA-  | TCGT | TACC | CC  | ACACA | GGAGTGC | ACCC-----AAGGAAAG-AC | TAA |
| Osbi | TATTAC-----AA | TCAT | TAAT | CC  | ACACC | GGGTGC  | TATTCA---AAGGAAAG-AC | TAA |
| Pabu | AGCAAAATT--A- | TCGT | CAAC | CCA | ACACA | GGAGCCG | AC----TACAAGGAATG-AC | TAA |
| Hial | TGACAA---ATA- | TCGT | TAAC | CCA | ACACA | GGAGTGC | AAA-----AAGGAAAG-AC  | TCA |
| Elha | CAACACAATA--  | CCGT | TAGC | CC  | ACACA | GGAGTGC | CC-C----AAGGAAAG-AC  | TAA |
| Mlcy | GCTACC--CACTA | CCGT | TAAC | CCA | ACACA | GGAGTGC | AGCC-TCAGAAGGAAAG-AC | TAA |
| Algl | CAGTGAGATC-A- | TCGT | TAGC | CCG | ACACA | GGAGTGC | CTAT-G---ATGGAAAG-AT | TGA |
| Ptgi | CGA---AAAATGA | TCGT | TAAC | CCA | ACACA | GGGTGC  | CA-----CAAGGAAAG-AC  | TAA |
| Alaf | ATGAAGCAAA--  | TCGT | TAAC | CCA | ACACA | GGATGC  | ACAA-----AGGAAAG-AC  | ACA |
| Nock | TGAAGAAA---A- | TCGT | TGAC | CCA | ACACA | GGGTGC  | ACA-----AAGGAAAG-AC  | ATA |
| Anja | TAATACCACA-AA | CCGT | TAAC | CCA | ACACA | GGAGTGC | CTA-----A-AGGAAAG-AC | TA- |
| Gyki | GCCAAA---ACAA | CCGT | CACC | CCA | ACACA | GGAGTGC | GCC-----CAGGAAAG-AC  | TAA |
| Syka | TATTACCTACAA- | TCGT | TAGC | CCC | ACACA | GGAGTGC | CCATA---AAAGGAAAG-AC | TAA |
| Opma | TATGAGAACAA-  | CCGT | TAAC | CCA | ACACA | GGGTGC  | AAT---A--AAGGAAAG-AC | TAA |
| Comy | TTAAAAC-A---A | CCGT | TAAC | CCA | ACACA | GGAGTGC | CACT----TAAGGAAAG-AC | TAA |
| Sasp | TAC--TATCACAT | TCGT | TAAC | CCA | ACACA | GGAGTGC | CTT-----AAAGGAAAG-AC | TAA |
| Eupe | AAACCACAAA--  | CTGT | TAAC | CCG | ACACA | GGAGTGC | ATCT-----AAGGAAAG-AC | AAA |
| Enja | TTC--CCCAGA-A | TCGT | TACC | CCG | ACACA | GGAGTGC | CAGA---ACAAGGAAAG-AC | TTA |
| Same | TAG-TGAAA--CA | TCGT | TACC | CCA | ACACA | GGAGTGC | TCTA--GCCAAGGAAAG-AC | TTA |
| Chch | CATTCAATAAAA- | TCGT | TACC | CCC | ACACA | GGGTGC  | TAAC---TAAGGAAAG-AC  | AAA |
| Grgr | GC-CACCTGAA-  | TCGT | TGAC | CC  | ACACA | GGGTGC  | CCC-----TGGGAAAG-AC  | TAA |
| Caau | CACAACCTAAGTA | TCGT | TACC | CCC | ACACT | GGAGTGC | AACA-----AAGGAAAG-AC | TAA |
| Cyca | CAA--CTAAACTA | TCGT | TACC | CCC | ACACT | GGAGTGC | CCT----AAAGGAAAG-AC  | TAA |
| Dare | CAACA----GACA | TCGT | TACC | CCC | ACACT | GGAGTGC | ATAT----AAGGAAAG-AC  | TAA |
| Cost | TA--AAATAATA  | TCGT | TAAT | CCC | ACACT | GGATGC  | CCC-----AAGGAAAG-AC  | TAA |
| Leec | CAACACCTG--AA | TCGT | AAAA | CCC | ACACT | GGAGTGC | TAT----CCAGGAAAG-AC  | TAA |
| CrIa | AT-GTTATAACAA | TCGT | TAAC | CCC | ACACT | GGAGTGC | CC----C-CAGGAAAG-AC  | TAA |
| Clmc | CTA--ACC---CA | TCGT | TAAC | CCC | ACACC | GGAGGC  | CCC-C-AACAAGGAAAG-AC | TAA |
| Phin | CAC-ACCC---CT | TCGT | TAAC | CCC | ACACT | GGCGGC  | CACC----ACAGGAAAG-AC | TA- |
| Icpu | CA-TACACCTGCA | TCGT | TAAC | CCC | ACACC | GGAGGC  | AGA----ATAGGAAAG-AC  | TAA |
| Psto | CATAAAA-TAA-  | TCGT | TAAA | CCC | ACACC | GGAGGC  | CTA----CATAGGAAAG-AC | TAA |
| Cora | CACGACTTAA--  | TCGT | TAAC | CCC | ACACC | GGAGGC  | TAC-----AAGGAAAG-AC  | TAA |
| Eisp | CGC--ACACACAA | TCGT | TAAT | CC  | ACACT | GGAGGA  | TAC-----AGGAAAG-AC   | TAA |
| Apal | CACCAC-CAA--  | TCGT | TAAC | CT  | ACACC | AGCGGC  | AACT----AAGGAAAG-AC  | TAA |
| EsLu | CA-TAAAC--CAA | TCGT | TAAC | TCC | ACACT | GATGTC  | ACC--C---AAGGAAAG-AC | CTA |
| Dape | CA-TAAAT--AA  | TCGT | TAAC | TCC | ACACT | GATGTC  | CT-----CCGGGAAAG-AC  | CTA |
| Glse | TACATT---TAAA | TCGT | TAAC | CCC | ACACA | GGAGTGC | CCCC----AAGGAAAG-AC  | CTT |
| Naar | TATACT---ACTA | TCGT | TAAC | CCC | ACACA | GGAGTGT | TCCC-----CAGGAAAG-AC | CTA |
| Baoc | TATTCCGCAA--  | TCGT | TAAC | CCC | ACACA | GGAGTGT | TCTC----TGGGAAAG-AC  | CTT |
| Opso | TAT--AA-AATAA | TCGT | TATT | CC  | ACACA | GGGTGC  | CC-----TAAGGAAAG-AC  | TAA |
| Alte | CACGCACACA--  | TCGT | TACC | CC  | ACACA | GGAGTGC | CTAT---AAGAGGAAAG-AC | CCA |
| Plap | CAC--ACGCAC-A | TCGT | TAGC | CCC | ACACA | GGAGTGC | CCCC---AAGAGGAAAG-AC | CCA |

Plal CAA--AGTGACCA TCGT T AAT CCC-ACACA GG AGTGC CTA-----G AGG AAA G- AC TAA  
 Sami ATGAAAC-G---A TCGT T AGC CCC-ACACA GG AGTGC ACCA-----AGG AAA G- AC TAA  
 Rere ATC-CA--CAACA TCGT T GAC CCT-ACACA GG AGTGC TTG-----AGG AAA G- AC TAA  
 Gama TTG---TAATGAA TCGT T GAC CCC-ACACT GG AGTGC A-T-----AA GGG AAA G- GC CTA  
 Onmy CA-CCAACA--AA TCGT T ACC CCC-ACACA GG AGTGC CC-----CAA GGG AAA G- AC CCA  
 Sasa CATCAA---CAAA TCGT T AAC CCC-ACACA GG AGTGC TCAC-----A GGG AAA G- AC CTA  
 Cola CAAAATA-A---TCGT T AAA CCC-ACACA GG AGTGC CCAC-----A AGG AAA G- AC CCA  
 Dita GAATGTAACA--TCGT T AAC CCT-ACACA GG AGTGC CCCA-----A GGG AAA G- AC CTA  
 Gogr AA-TAATCCTATA TCGT T AAC CCC-ACACA GG AGTGC ATA-----TA AGG AAA G- AC CTA  
 Chsl AGA--TGCTTCA TCGT T AAC CCA-ACACA GG AGTGC CC-----CG AGG AAA G- AC TAA  
 Atja CAATATATTTT CGA TCGT T AAA CCT-ACACA GG AGTGC CACC-----C GGG AAA G- AC TAA  
 lido CAACAATTTT-AA TCGT T AAC CCC-ACACA GG AGTGC CCCC-----AGG AAA G- AC TAA  
 Auja CACCTATAAA---CCAT T AAC CCC-ACACA GG AGTGC TTAC-----C AGG AAA G- AC CAA  
 Chag CAATAAAC--AA TCGT T ATC CCC-ACACA GG AGTGC CC----CACC CGG AAA A- AC GAA  
 Hami TAATCAACT--A-CCAT T AGA CCC-ACACA GG AGTGC AA----CTA AGG AAA G- AC TAA  
 Saun CAAGATATA---ACAT T AAA CCC-ACACA GG TGTGC CAAC-----A GGG AAA G- AC TA-  
 Nema CAC--GAACCGAA TCGT T AGC CCT-ACACA GG TGTGC AGC-----CC AGG AAA G- AC TAA  
 Disp CAT-AAC-TAA--CCG T AAC CCA-ACACA GG TGTGC ACG-----CC CGG AAA G- AC TTA  
 Myaf TA--TAATAG--TCGT T AAC CCA-ACACA GG TGTGC GCC-----CGG AAA G- AC TAA  
 Lagu CA-AATAATA---TCGT T AAC CT T-ACACC AG AGTGC AAC--C---A AGG AAA G- AC TAA  
 Trtr CACCCTCCCC-CA TCGT T AAC CT A-ACACA AG ATGC AC-----C-A GGG AAA G- AC TAA  
 Zucr CACATT---AA-A CCG T GAC CT A-ACACA AG ATGC ACC-----A AGG AAA G- AC TAA  
 Pxja CACCTTAAT--AA TCGT T AAC CCT-ACACA GG AGTGC AT-----ACA AGG AAA G- AC TAA  
 Pxlo CAC--CTTAATAA TCGT T AAC CCC-ACACA GG AGTGC ATA-----CA AGG AAA G- AC TAA  
 Pctr CACCCCCAAA---TCGT T ACC CCC-ACACA GG AGTGC AACA----AG TGG AAA G- AC TAA  
 Apsa TACCTAAC--A-CCG T AAC CCT-ACACC GG AGTGT -AAT-----A AGG AAA G- AC TAA  
 Cabe CAGTACACA---CAG T GAC CCC-ACACC GG AGTGC AC-----CA AGG AAA G- AC TTA  
 Bzze CAACAACCG---ACG T AAC CCC-ACACT GG TGTGC CT-----GCA AGG AAA G- AC TGA  
 Siim CAACAACAA---ATG T AAT CCA-ACACC GG CGTGC TA-----CCC AGG AAA G- AC TAA  
 Ctru CAACACAAAG---CCG T TAGC CCC-ACACT GG AGTGC CCAC-----A AGG AAA G- AC TAA  
 Dpbr CACATCTATAG--CCG T AAC CCC-ACACT GG TGTGC CCACA-----AGG AAA G- AC TAA  
 Caki TAACTAA-T-A--TCGT T GAC CCT-ACACA GG ATGC ACC-----A AGG AAA G- AC TAA  
 Phja TA-G-AATTTA--TCGT T AAC CCC-ACACA GG TGTGC CCC-----A AGG AAA G- AC TAA  
 Brsp TAAACCTA----A CTG T AAC CCT-ACACA GG AGTGC ACC-----A-AGG AAA G- AC TTT  
 Gamo TATTTTAT-A--TCGT T AAC CCC-ACACA GG TGTGC CTAA-----AGG AAA G- AC TAA  
 Lolo TA---TT-TTTTA TCGT T AAC CCCACACAGG TGTGC CCA-----A AGG AAA G- AC TAA  
 Batr CAACACAA---ACG T AAC CCG-ACACA GG TGTGC TGCA-----A AGG AAA G- AC AA-  
 Prmy C--TCATTAA-A-CCG T AGAC CCC-ACACA GG CATGT GCC-----T AGG AAA G- AT TAA  
 Loli CAATGCAT----ACG T AAC CT C-ACACT AG AGTGC CCCC-----A-AGG AAA G- AC TA-  
 Loam CAG---TAACTAA CCG T AAC CT C-ACACT AG AGTGC TGCC-----A AGG AAA G- AC TAA  
 Chab CAAAA----CCCA CCG T AAC CCC-ACACT GG CGTGC TTCA-----A GGG AAA G- AC TAA  
 Chto CA-AACCCA---CCG T AAC CCC-ACACT GG CGTGC TTC---CAA GGG AAA G- AC TAA  
 Majo CAGCTCACCCA--CCG T AAC CCC-ACACT GG TGTGC CTA---C-A AGG AAA G- AC TAA  
 Hlst AAACATTTTA-AA CCG T ACC CCT-ACACT GG AGTGT TACA-----A AGG AAA G- AC TAA  
 Clpe CAGCAACCAA---CCG T GAC CCC-ACACT GG TGTGC AT-C---AA GGG AAA G- AC AGA  
 Mlmr CAATAA---GTTA CCG T ACC CCC-ACACT GG AGTGC CCCC-----A AGG AAA G- GC TGA  
 Cr cr CAAAAC---CCCA CCG T AAC CCC-ACACT GG CGTGC CCTC-----A GGG AAA G- GT TAA  
 Muce CAA---AACCCA CCG T AAT CCG-ACACT GG CGTGC CCT-----CA GGG AAA G- GT TAA  
 Bege CATAAA--TT-A-CCG T AAC CCC-ACACT GG CCGCC CCA-----TGG AAA G- AC TAA  
 Mela CAAATA---TCC-CCG T AAC CCT-ACACT GG AGCCG CTCC-----G TGG AAA G- AC TAA  
 Hats CAAAAGATA---CCG T AAC CCC-ACACT GG TGTGT CC-----CCA CCG AAA G- AC TAA  
 Or la -ACATA---ATTA CCG T ACT CCT-ACACC GG TGTGC TCTT-----T AGG AAA G- AC AAA

Cosa TAATAACTA--A CCGTUAACCC-ACACTGGTGTGCCCCC-----CGGAAAG-AC TAA  
 Exsp CAACAA--AT--A CCGTUGACCC-ACACTGGAATGCTAAC-----CTGGAAAG-AC CAA  
 Depa TAC--AA--ATAA CCGTUAACCC-ACACTGGTGTGCCCTT-----C CCGAAAG-AC TAA  
 Rima TA-AACACTAA-A CCGTUAACCC-ACACA GGC ACTC CCC-----TG AAGAAAG-AC TAA  
 Fuol TATTTAT-TAA-- CCGTUAACCC-ACACTGGTGTACAAA----C-T TGGAAAG-AC TAA  
 Gmaf TA--A-ACAAATA CCGTUAACCC-ACACA GGA GTGC CCC-----T- GGGAAAG-AC TAA  
 Xeei TAATAAAAT--AA CCGTUAACCC-ACACTGGCGTGC AAGC-----C CCGAAAG-AC TAA  
 Pros CA-ACCATCAA-- CCGTUAAGCCC-ACACTGGA GTGC CCA-----CA AGGAAAG-AC TAA  
 Scmi TGATTACC---CA CCGTUAACCC-ACACTGGCGTGC CC-----ACA AGGAAAG-AC TAA  
 Rolo TCAATTATAAA-- CCGTUAAGCCC-ACACC GGA GTGC ACA-----CA AGGAAAG-AC TAA  
 Cere CAACACTTT--GG CCGTUAACCC-ACACC GGA GTGC TT-----ACA AGGAAAG-AC TAA  
 Daga CATATT---ATG- CCGTUGATCC-ACACTGGGTGC TTAA-----A AGGAAAG-AC TAA  
 Anco CAACAAAA----A CCGTUAACCC-ACACTGGTGTGC AAC-----A AGGAAAG-AC TAA  
 Dmve CAACAACC----A CCGTUAACCCA-ACACTGGCGTGC ACCC-----C AGG GAAAG-AC TA-  
 Dmar CAAC-AGC---CA CCGTUAAGCCC-ACACTGGCGTGC AATT-----A AGGAAAG-AC TAA  
 Anka CAATTAAC---AA TCGTUAACCC-ACACTGGTGTGC T-----AAA AGGAAAG-AC TAA  
 Moja CAACAAC---AA CCGTUAACCC-ACACTGGTGTGC AAC-----A AGGAAAG-AC TAA  
 Hoja CAATAA-CAG--- CCGTUAACCC-ACACTGGTGTGC AACA-----A AGGAAAG-AC TAA  
 Bede CA--A-ACTACTGG CCGTUAACCC-ACACTGGA GTGC CCAC-----A AGGAAAG-AC TAA  
 Bosp CAAATACTA---G CCGTUGACCC-ACACTGGA GTGC CCAC-----A AGGAAAG-AC TAA  
 Mysp CAAAACAACACCA CCGTUAACCC-ACACTGGA GTGC CTGC-----A AGG GAAAG-AC TAA  
 Osja CAA--CCAAACCA CCGTUAAGCCC-ACACTGGA GTGC -CT----ACA AGGAAAG-AC TAA  
 Sgro CAACAAA-TTTAA CCGTUAACCC-ACACTGGA GTGC AAAC-----A AGGAAAG-AC TAA  
 Pzpa TACTTAAC----A CCGTUAACCC-ACACA GGA GTGT TATC-----A AGGAAAG-AC CA-  
 Zeja CACTTATTTA--- TCGTUAAGCCC-ACACA GGA GTGT TTTC-----A AGGAAAG-AC AAA  
 Znne CACTAA-ACA-A- TCGTUAACCC-ACACA GGA GTGT AATT-----A AGGAAAG-AC CAA  
 Zefa CACTAA-AA---A TCGTUAACCCA-ACACA GGA GTAT AAAT-----A AGGAAAG-AC AAA  
 Acni CACCTATA---A- TCGTUAACCCA-ACACA GGA GTGT ATT-----TA AGGAAAG-AC AAA  
 Ncrh CACCTA--TAA-- TCGTUAACCCA-ACACA GGA GTGT ATT--T---A AGGAAAG-AC AAA  
 Agca CAACAATCAA--- CCGTUAACCC-ACACTGGTGTGC CCAT-----A AGGAAAG-AC TAA  
 Hydy CAAAAACT---AG CCGTUAACCC-ACACA GGA GTGC CCC-----C GGGAAAG-AC TAA  
 Gsac CAACATTTGA--- CCGTUAACCC-ACACA GGA GTGC CC-C-----C GGGAAAG-AC TAA  
 Pevo CA--CCAT-CACA CCGTUAACCT-ACACA AGC GTGC TCC--C---A AGGAAAG-AC TAA  
 Hiku CAAT--AATAAA- CCAATCAACCC-ACACC GGA TTGC TAA-----CC AGGATAA-AC TAA  
 Inpa TAACCAAC--A- CCGTUGAACCA-ACACC GGA GTGC CC-----CAT AGGAAAG-AC CTA  
 Auch CAGT-AAACCCTC CCGTUAACCC-ACACA GGA GTGC ACCC-----C GGGAAAG-AC TTA  
 Fico CAAAACTT---A CCGTUAACCC-ACACTGGTGTGC CCAC-----T AGGAAAG-AC TAA  
 Macs CA-GACAAA--AA CCGTUAAT TCC-ACACTGAT GTGC CC-----CCA AGGAAAG-AC TAA  
 Moal CAACAATCAT--- CCAATUAATCT-ACACC AGC GTGT GATA-----A AGGAAAG-AC TAA  
 Syma CAACAT---ACA- CCAATUAATCT-ACACTTA- GTGT AATA-----A AGGAAAG-AC TAA  
 Maf r CACCAACCA---A CCGTUAACCT-ACACC AGA GTGC CCCC-----A AGGAAAG-GC TGA  
 Dcpe CA--ACAATA-CA CCGTUAATCCC-ACACTGGTGTGC CAA---C-A AGGAAAG-AT TGA  
 Dct i AACATTAACA--- CCGTUAACCC-ACACTGGTGTGC CAA-----CA AGGAAAG-AT TAA  
 Hehi CAA--ACACAAA CCGTUAACCC-ACACA GGA GTGC ACT-----TT AGGAAAG-AC TAA  
 Stam CAACACA-----A CCGTUAACCC-ACACA GGA GTGC CCCC-----C GGGAAAG-AC TA-  
 Hogi CAAACATA---A- CCGTUAACCC-ACACA GGA ATGC ATT-----TA AGGAAAG-AC CAA  
 Erzo CAAAAAAGA--- TCGTUAACCC-ACACA GGA GTGC CAAT-----A AGGAAAG-AC TAA  
 Hxot CAAAAACCAA--- CCGTUAACCC-ACACA GGA GTGC CCCC-----A GGGAAAG-AC TAA  
 Core CA--ACAACA-A CCGTUAACCC-ACACA GGA GTGC CCA-----CA GGGAAAG-AC TGA  
 Apve CAAGAACT---GA CCGTUAACCC-ACACA GGA GTGC CCCT---A- GGGAAAG-AC TA-  
 Lat j CAA-CACAT--AA CCGTUAACCC-ACACTGGTGTGC TC---G--A AGGAAAG-AC TAA  
 Laja CAATAAC-TTA-- CCGTUAACCC-ACACTGGTGTGC TCC-----A AGGAAAG-AC TAA



Syja CAACAATA---AA**CCG**T**AA**C**CT**-ACACT**AG****AGTGC**CAA-----CA**AGG**AAA**G**-**AC**TAA  
 Epme CAAACAATT---AA**CCG**T**AA**C**CC**-ACACA**GG****GTGC**TT----TT-**AGG**AAA**G**-**AC**TAA  
 Grse CAACAA---CCAA**CCG**T**AA**C**CC**-ACACA**GG****GTGT**CCCC-----**AGG**AAA**G**-**AC**TAA  
 Clja CA-TTAATAAA---**CCG**T**AA**A**CC**-ACACT**GG****AGTGC**CCC-----AT**GGG**AAA**G**-**AC**TAA  
 Ogcy TC-AACACAAA-A**CCG**T**AA**C**CC**A-ACACT**GG****AGTGT**GAA-----CA**AGG**AAA**G**-**AT**TAA  
 Plna CAA-ACTCT--TA**CCG**T**AA**T**CC**-ACACT**GG****GTAC**TTTT----**AAGG**AAA**G**-**AC**TAA  
 Lema CAAGCT--TTTAA**CCG**T**AA**C**CC**-ACACT**GG****GTGC**CCCT-----**TGGG**AAA**G**-**AC**TAA  
 Etzo CA-ACAGCCTA-A**CCG**T**AA**T**CC**-ACACA**GG****GTGC**CCA-----CA**AGG**AAA**G**-**AC**TAA  
 Apse CA-CCCC--TAA**CCG**T**AA**C**CT**-ACACC**AG****AGTGC**ACT----C-**AGG**AAA**G**-**AC**TAA  
 Epde CAATAATT---AA**CCG**T**AA**C**CC**-ACACT**GG****GTGC**TTTT----**AAGG**AAA**G**-**AC**TA-  
 Slja CACCCCCCTAA-**CCG**T**TA**C**CC**-ACACT**GG****AGTGC**CTT-----TT**AGG**AAA**G**-**AC**TAA  
 Bsja CAGTAACCA---A**CCG**T**AA**C**CC**A-ACACC**GG****GTGC**CCTTTTTCAA**AGG**AAA**G**-**AC**TAA  
 Ecna TAA--AAAT--AA**GGG**T**AA**C**CC**-ACACT**GG****GAGC**---A--TACA**GGG**AAA**G**-**AC**TAA  
 Cohi CAAAAT---TAAA**CCG**T**AA**C**CC**-ACAC-**GG****AGTGC**TCTTTT---**AAGG**AAA**G**-**AC**TAA  
 Caar CTAAAT---TA**CCG**T**AA**T**CC**-ACACT**GG****GTGC**C--TA---CT**AGG**AAA**G**-**AC**TAA  
 Came CAACCAAC----A**CCG**T**AA**C**CC**-ACACT**GG****GTGC**TTAC-----**CAGG**AAA**G**-**AC**TA-  
 Mema CAAGACCC-T--**TCG**T**AA**C**CC**-ACACA**GG****GTGC**AC-----CCA**AGG**AAA**G**-**AC**TAA  
 Lenu CAACACATCC---**CCG**T**CA**C**CC**-ACACA**GG****AGTGC**CATTA---**ATGG**AAA**G**-**AC**TAA  
 Brja CAACAAGCAA---**CCG**T**AA**C**CC**-ACACC**GG****GTGC**CCCC-----**CAGG**AAA**G**-**AC**TAA  
 Plma CAATAAACA---A**CCG**T**AA**C**CC**-ACACT**GG****GTGC**CCCC-----**TGAGG**AAA**G**-**AC**TA-  
 Emst CAATGA-GAA-A-**CCG**T**AA**C**CC**-ACACT**GG****GTGC**CCAT-----**GGGG**AAA**G**-**AC**TAA  
 Ptti CAATTACACA--A**CCG**T**AA**C**CC**-ACACT**GG****GTGC**ACCC-----**AAGG**AAA**G**-**AC**TAA  
 Losu CAACCTCATT---**CCG**T**GA**C**CC**-ACACT**GG****GTGC**AA-C----TA**GGG**AAA**G**-**AC**AAA  
 Geoy CAA--TGCAAC-A**TCG**T**AA**A**CC**-ACACT**GG****AGTGC**ACC---CCC**GGG**AAA**G**-**AC**TAA  
 Dipi CAT--TAC-ACAA**CCG**T**AA**C**CT**-ACACT**GG****GTGC**CCC-----TA**AGG**AAA**G**-**AC**TAA  
 Pama CAAGACAA---AA**GGG**T**AA**C**CC**-ACACT**GG****AGTGC**TC-----TTA**GGG**AAA**G**-**AC**TAA  
 Leob CAATAACTA---A**CCG**T**GA**C**CC**-ACACT**GG****GTGC**TTTT-----**AAGG**AAA**G**-**AC**TAA  
 Neba CAAAATT-A--**TCG**T**AA**C**CC**-ACACT**GG****GTGT**TTTT-----**TAGG**AAA**G**-**AC**TAA  
 Pdpi CACAACATTAACC**CCG**T**AA**A**TCT**-ACACC**GA****GTGC**AAT---CCA**GGG**AAA**G**-**AC**TAA  
 Nimi CAATAC---TCAA**CCG**T**GA**A**CC**-ACACT**GG****GTGC**CCCC-----**GAGG**AAA**G**-**AC**TAA  
 Uptr CA--GCTCACCCA**CCG**T**AA**C**CC**-ACACT**GG****GTGC**CCA---C-**AGG**AAA**G**-**AC**TAA  
 Pesc CAAACC---CACA**CCG**T**AA**C**CC**-ACACA**GG****GTGC**CTAA-----**AAGG**AAA**G**-**AC**TTA  
 Baar CACCAATAC---**CCG**T**AG**T**CC**-ACACT**GG****AGTGC**CCCCT---**AAGG**AAA**G**-**AC**TAA  
 Moar CAACAAACAA---**CCG**T**AA**A**CC**-ACACT**GG****AGTGC**TCTC-----**AGGG**AAA**G**-**AC**TAA  
 Toja -CATTC--TAACA**CCG**T**AA**C**CC**-ACACT**GG****GTGC**C-CC----TC**GGG**AAA**G**-**AC**TAA  
 Chau CA-ATAACT--A-**CCG**T**AA**C**CC**-ACACT**GG****GTGA**-T----TTCA**AGG**AAA**G**-**AC**TAA  
 Chse CAGAAATT---AA**CCG**T**AA**C**CC**-ACACC**GG****GTGC**CCCC----TA**GGG**AAA**G**-**AC**TAA  
 Enar CAATAACT---AA**CCG**T**AA**C**CC**-ACACT**GG****GTGC**CCC-----TA**GGG**AAA**G**-**AC**TAA  
 Hpty CACAAA---TCAA**CCG**T**AA**C**CC**-ACACT**GG****GTGC**CCCC-----**AAGG**AAA**G**-**AC**TAA  
 Nana CACTAAA--TCAA**CCG**T**TA**A**CC**-ACACT**GG****GTGC**ATAC-----**TAGG**AAA**G**-**AC**TAA  
 Mcst CAACAACACA-A-**CCG**T**AA**C**CC**-ACACT**GG****GTGC**CCCT-----**AAGG**AAA**G**-**AC**TAA  
 Rhox CAAATACAAC-TA**CCG**T**AA**C**CC**-ACACC**GG****GTGC**TTAC-----**AAGG**AAA**G**-**AC**TAA  
 Opfa CATACAAC---GA**CCG**T**AA**C**CC**-ACACT**GG****GTGC**AC-----CCA**AGG**AAA**G**-**AC**TAA  
 Paar CAA---ATTCAA**GGG**T**AA**C**CC**-ACACT**GG****AGTGC**TTT-----TT**AGG**AAA**G**-**AC**TAA  
 Gozo CCACCATCT--AG**CCG**T**AA**C**CC**-ACACA**GG****GTGC**CC-----TCC**GGG**AAA**G**-**AC**TAA  
 Ackr CA-AACCCCG--**CCG**T**AA**C**CC**-ACACT**GG****AGTGC**AAA-----CA**AGG**AAA**G**-**AC**TAA  
 Elev TAC--CGATT-AA**CCG**T**AA**A**CC**-ACACT**GG****GTGC**CAC-----CT**GGG**AAA**G**-**AC**TAA  
 Trdu TA-GTTCC--TCA**CCG**T**AA**C**CC**-ACACT**GG****GTGC**AAA---C-**CGG**AAA**G**-**AC**TAA  
 Amoc CA-CACTTA--TA**CCG**T**AA**T**CC**-ACACT**GG****GTGC**CT-----ATA**AGG**AAA**G**-**AC**TAA  
 Hame CAAAAACAA---A**CCG**T**AA**C**CC**-ACACT**GG****GTAT**CTAA-----**AGGG**GAA**G**-**GC**TGA  
 Chso CCTAAAAT--TAA**CCG**T**AA**C**CC**-ACACT**GG****GTGC**CTAC-----**AAGG**AAA**G**-**AC**TAA  
 Lyto CAG---GAAATAA**CCG**T**AA**C**CC**-ACACA**GG****GTGC**CCA-----CA**GGG**AAA**G**-**GC**TAA

Encr CAGGAA-TTA--A CCGT T AAC CCC-ACACA GG T GTGC CCAC-----A GGG AAA G- GC TAA  
 Bvar CAATAACACA--- CCGT T AAC CCC-ACACA GG C GTGC GCCT-----T AGG AAA G- AC TAA  
 Noco CAACCA-CCA-A- CCGA T ACC CCA-ACACA GG T GTGC CCCT-----A GGG AAA A- AC TAA  
 Chsp CA--AAACATA-A CCGT T ACC CCT-ACACT GG C ATGC CAC-----TA AGG AAA G- AC TAA  
 Arja AAAAACTA-A--- CCGT T ACC CCT-ACACA GG T GTGC CCCC-----A GGG AAA G- AC TAA  
 Pase CATCAATTA--AA CCGT T AAC CCC-ACACT GG T GTGC CT-----TA AGG AAA G- AT TAA  
 Trel CAAT--TAATCA- CCGT T GAC CCC-ACACT GG A GAGC CTG-----CA AGG AAA G- AC AAA  
 Lifa TAACTATTAA--A CCGT T TAC CCC-ACACC GG A GTGC CACC-----C AGG GAA G- AC TAA  
 Acur CATCTATTA--AA CCGT T GAT C T T-ACACT AG G T TAC CT-----ATA AGG AAA G- AC TAA  
 Ampe CAACTA---AAGA CCGT T AAC CCC-ACACT GG T GTGC CCCC-----A AGG AAA G- AC TGA  
 Urja CACCCATT---A- CCGT T AAC CCT-ACACA GG C ATGC TTT-----TA AGG AAA G- AC TAA  
 Enet CAC-TGCTAA--- CCGT T AAC C T T-ACACT AG A GTGC CTTT-----AA AGG AAA G- AC TAA  
 Ptbr TCA--CCCTGC-A CCGT T AAC C T T-ACACT AG A ATGA CT-----ATA AGG AAA G- AC TAA  
 Safa CACAGTCCAA--- CCGT T AAC C T T-ACACC AG A GTGC CCCC-----A AGG AAA G- AC TAA  
 Icae CAATAA---ACAA CCGT T AAC CCC-ACACT GG T GTGC CCCT-----A AGG AAA G- AC TAA  
 Asmi CTTATA--CCTTT G C A T T ACC C T A-ACACA AG C GTGC TTTT-----T AGG AAA G- AT TAA  
 Foal CATAAA----TAA CCGT T AAC CCC-ACACA GG T GTGC CCAC-----A AGG AAA G- AC AAT  
 Drze CAAAAT---TTTA CCGT T AAT C C T-ACACT GG T GTGT TAAA-----T GGG AAA G- AC TAA  
 Rhas CA-ACAA-AAA- CCGT T GAG C C C-ACACA GG A GTGC CTC-----C AGG AAA G- AC TAA  
 Elac CATCAAATA-A- CCGT T AAC CCC-ACACA GG A GTGC CC-----C AGG AAA G- AC TAA  
 Kugu CAATAACACCAAAA CCGT T AAC CCC-ACACT GG T GTGC TAA-----CC AGG AAA G- AC TAA  
 Plor CACATA--AACAA CCGT T AAC CCC-ACACT GG T GTGC CCCC-----A AGG AAA G- AC TAA  
 Sgun TAC---AACCCAA CCGT T AAC CCC-ACACT GG T GTGC TCA-----AA TGG AAA G- AC TAA  
 Zaco CTACA---AAAA CCGT T AAC C C T-ACACA GG T GTGC CC-----ACA AGG AAA G- AC TAA  
 Zbfl CATTAAA-TAA- CCGT T AAC CCC-ACACT GG T GTGC CCC-----AA GGG AAA G- AC TAA  
 Spba CCA--CCATCACA CCGT T AAC C C T-ACACT GG T ATGC TCC-----CA AGG AAA G- AC TAA  
 Game CA-ATAAGT--AA CCGT T AAC CCC-ACACT GG T GTGC CC-----CTA AGG AAA G T AC TAA  
 Thth CAA--AAA-ACAA CCGT T AAC CCC-ACACT GG T GTGC CATT-----A AGG AAA G- AC TAA  
 Xigl CAGCTTAT---TA CCGT T AAC CCC-ACACT GG T GTGC CCCT-----A AGG AAA G- AC TA-  
 Hyja CAATGA---ATAA CCGT T AAC CCA-ACACT GG T GTGC CTAT-----A AGG AAA G- AC TAA  
 Psan CAATTGATTA--- CCGT T AAC CCA-ACACT GG T GTGC CCAT-----A AGG AAA G- AC TAA  
 Cupa CA-ATTAATAA--- CCGT T AAC CCC-ACACT GG T GTGC CCC-----T-A AGG AAA G- AC TAA  
 Mpch CAACAA-T---AA CCGT T AAC CCC-ACACT GG T GTGC TAA-----AA AGG AAA G- AC TAA  
 Char CAAGAA---ACAA CCGT T AAG C C C-ACACT GG C GTGC CCCC-----A AGG AAA G- AC TAA  
 Pser TAATAATATAAC- CCGT T AAC CCC-ACWCT GG T ATGC ACCT-----C GGG AAA G- AC AAA  
 Prol CAATAC---AACC CCGT T AAC CCC-ACACT GG T GTGC CCCA-----G AGG AAA G- AC CCA  
 Plbi CC-AATGTA--- CCGT T AAC CCC-ACACT GG T GTGC CCA-----AA AGG AAA G- AC CAA  
 Calu CACCCCCAA--- CCGT T GAC C C C-ACACT GG C GTGC AT-----GA AGG AAA G- AC TAA  
 Papa CAAAAAAC---AA CCGT T AAC CCA-ACACA GG A GTAC TATA--TTAA AGG AAA G- AC TAA  
 Suf r CAAACAATTA-G- CCGT T GAC C C C-ACACT GG A ATTA-CCG--C--A AGG GAA A- GC TGA  
 Stci CAGCCACC---CA C C T T T ACC C C C-ACACT GG C GTGC C-CA-----A AGG AAA A- AC TAA  
 Taru TAACAC---TTTT CCGT T T ACC C C T-ACACT GG T GTGC CAAA-----T AGG AAA G- AC TAA  
 Rala CAATAAACCC--- CCGT T AAC CCC-ACACT GG A ATGC TTA-----AT AGG AAA G- AC TAA

\*\*\*

|      | 32                                                                                                                   |  | 33 | 34 | C |
|------|----------------------------------------------------------------------------------------------------------------------|--|----|----|---|
| Scca | AA <b>GAAA</b> - <b>GTA</b> <b>AGG</b> AACTCGGCAAACA-----T <b>AAACT</b> - <b>CCC</b> CC <b>TGTT</b> ACC <b>AA</b>    |  |    |    |   |
| Muma | AA <b>GAAA</b> - <b>ATA</b> <b>AGG</b> AACTCGGCAAACAC----- <b>AAACT</b> - <b>CCC</b> CC <b>TGTT</b> ACC <b>AA</b>    |  |    |    |   |
| Erca | AA <b>GAGA</b> - <b>AAA</b> <b>AGG</b> AACTCGGCAAACC-----T <b>GAGCC</b> - <b>CCC</b> CC <b>TGTT</b> ACC <b>AA</b>    |  |    |    |   |
| Pose | AA <b>GAGA</b> - <b>AAA</b> <b>AGG</b> AACTCGGCAAAC----- <b>GAGCC</b> - <b>CCC</b> CC <b>TGTT</b> ACC <b>AA</b>      |  |    |    |   |
| Actr | AA <b>GAAA</b> - <b>AAG</b> <b>AGG</b> AACTCGGCAAACA----- <b>GAGCC</b> - <b>TCC</b> CC <b>TGTT</b> ACC <b>AA</b>     |  |    |    |   |
| Scal | AA <b>GAAA</b> - <b>AAG</b> <b>AGG</b> AACTCGGCAAACA----- <b>GAGCC</b> - <b>TCC</b> CC <b>TGTT</b> ACC <b>AA</b>     |  |    |    |   |
| Posp | AA <b>GAAA</b> - <b>AAG</b> <b>AGG</b> AACTCGGCAAACA----- <b>GAGCC</b> - <b>TCC</b> CC <b>TGTT</b> ACC <b>AA</b>     |  |    |    |   |
| Atsp | AA <b>GAAA</b> - <b>AAG</b> <b>AGG</b> AACTCGGCAACCC----- <b>GAGCC</b> - <b>TCC</b> CC <b>TGTT</b> ACC <b>AA</b>     |  |    |    |   |
| Leoc | AA <b>GAAA</b> - <b>AAG</b> <b>AGG</b> AACTCGGCAACCC----- <b>GAGCC</b> - <b>TCC</b> CC <b>TGTT</b> ACC <b>AA</b>     |  |    |    |   |
| Amca | AA <b>GAAA</b> - <b>AGA</b> <b>AGG</b> AACTCGGCAAACA----- <b>GAGCC</b> - <b>TCC</b> CC <b>TGTT</b> ACC <b>AA</b>     |  |    |    |   |
| Osbi | AT <b>GAGG</b> <b>AAG</b> <b>AGG</b> AACTCGGCAAACC-----A <b>AGGTC</b> - <b>TCC</b> CC <b>TGTT</b> ACC <b>AA</b>      |  |    |    |   |
| Pabu | AT <b>GGAG</b> - <b>AAA</b> <b>AGG</b> AACTCGGCAAACA----- <b>GGGCC</b> - <b>TCC</b> CC <b>TGTT</b> ACC <b>AA</b>     |  |    |    |   |
| Hial | AA <b>GGAA</b> - <b>AAG</b> <b>AGG</b> AACTCGGCAAACA----- <b>GGGCC</b> - <b>TCC</b> CC <b>TGTT</b> ACC <b>AA</b>     |  |    |    |   |
| Elha | AA <b>GAGA</b> - <b>CGA</b> <b>AGG</b> AACTCGGCAAAC----- <b>GAGCC</b> - <b>TCC</b> CC <b>TGTT</b> ACC <b>AA</b>      |  |    |    |   |
| Mlcy | AA <b>GGAA</b> - <b>TAG</b> <b>AGG</b> AACTCGGCAAACA-----T <b>GAGCC</b> - <b>CCC</b> CC <b>TGTT</b> ACC <b>AA</b>    |  |    |    |   |
| Algl | AG <b>GGGA</b> - <b>GAG</b> <b>AGG</b> AACTCGGCAAACA-----T <b>GAGCC</b> - <b>TCC</b> CC <b>TGTT</b> ACC <b>AA</b>    |  |    |    |   |
| Ptgi | AA <b>GGGG</b> - <b>AAG</b> <b>AGG</b> AACTCGGCAAACA-----T <b>GAGCC</b> - <b>TCC</b> CC <b>TGTT</b> ACC <b>AA</b>    |  |    |    |   |
| Alaf | AG <b>GAGA</b> - <b>GAG</b> <b>AGG</b> AACTCGGCAAACA----- <b>GAGCC</b> - <b>TCC</b> CC <b>TGTT</b> ACC <b>AA</b>     |  |    |    |   |
| Nock | AG <b>AAGA</b> - <b>GAG</b> <b>AGG</b> AACTCGGCAAACC----- <b>GAGCC</b> - <b>TCC</b> CC <b>TGTT</b> ACC <b>AA</b>     |  |    |    |   |
| Anja | AA <b>AGGA</b> <b>GAG</b> <b>AGG</b> AACTCGGCAAACA-----C <b>AAACC</b> - <b>CCC</b> CC <b>TGTT</b> ACC <b>AA</b>      |  |    |    |   |
| Gyki | AA <b>GGAA</b> - <b>GAG</b> <b>AGG</b> AACTCGGCAAAGC-----A <b>AAGTC</b> - <b>CCC</b> CC <b>TGTT</b> ACC <b>AA</b>    |  |    |    |   |
| Syka | AA <b>GGAG</b> - <b>AAG</b> <b>AGG</b> AACTCGGCAAACA-----C <b>AAACC</b> - <b>CCC</b> CC <b>TGTT</b> ACC <b>AA</b>    |  |    |    |   |
| Opma | AA <b>GGAG</b> - <b>AAG</b> <b>AGG</b> AACTCGGCAAACA-----T <b>CAACC</b> - <b>CCC</b> CC <b>TGTT</b> ACC <b>AA</b>    |  |    |    |   |
| Comy | AA <b>GGGG</b> - <b>AAG</b> <b>AGG</b> AACTCGGCAAACA-----C <b>AAACC</b> - <b>TCC</b> CC <b>TGTT</b> ACC <b>AA</b>    |  |    |    |   |
| Sasp | AA <b>GGGA</b> - <b>GGG</b> <b>AGG</b> AACTCGGCAAACA-----T <b>ATCCC</b> - <b>CCC</b> CC <b>TGTT</b> ACC <b>AA</b>    |  |    |    |   |
| Eupe | AA <b>GGAG</b> - <b>AAG</b> <b>AGG</b> AACTCGGCAAACA-----C <b>AAACC</b> - <b>CCC</b> CC <b>TGTT</b> ACC <b>AA</b>    |  |    |    |   |
| Enja | AA <b>GAAA</b> - <b>AAA</b> <b>AGG</b> AACTCGGCAAACC----- <b>GAGCC</b> - <b>TCC</b> CC <b>TGTT</b> ACC <b>AA</b>     |  |    |    |   |
| Same | AA <b>GAAT</b> - <b>TAA</b> <b>AGG</b> AACTCGGCAAAC-----A <b>GAACC</b> - <b>TCC</b> CC <b>TGTT</b> ACC <b>AA</b>     |  |    |    |   |
| Chch | AA <b>GGGA</b> - <b>AGA</b> <b>AGG</b> AACTCGGCAAACA-----T <b>AAGCC</b> - <b>TCC</b> CC <b>TGTT</b> ACC <b>AA</b>    |  |    |    |   |
| Grgr | GA <b>GGGG</b> - <b>GGA</b> <b>AGG</b> AACTCGGCAAACA-----C <b>AAGCC</b> - <b>TCC</b> CC <b>TGTT</b> ACC <b>AA</b>    |  |    |    |   |
| Caau | AA <b>GAAA</b> - <b>AGG</b> <b>AGG</b> AACTCGGCAAACA-----C <b>AAGCC</b> - <b>TCC</b> CC <b>TGTT</b> ACC <b>AA</b>    |  |    |    |   |
| Cyca | AA <b>GAAA</b> - <b>AGG</b> <b>AGG</b> AACTCGGCAAACA-----C <b>AAGCC</b> - <b>TCC</b> CC <b>TGTT</b> ACC <b>AA</b>    |  |    |    |   |
| Dare | AA <b>GAAA</b> - <b>GGG</b> <b>AGG</b> AACTCGGCAAACA-----C <b>AAGCC</b> - <b>TCC</b> CC <b>TGTT</b> ACC <b>AA</b>    |  |    |    |   |
| Cost | AA <b>GAAA</b> - <b>GGG</b> <b>AGG</b> AACTCGGCAAACA-----C <b>AAGCC</b> - <b>TCC</b> CC <b>TGTT</b> ACC <b>AA</b>    |  |    |    |   |
| Leec | AA <b>GAAA</b> - <b>AGG</b> <b>AGG</b> AACTCGGCAAACA-----T <b>AAGCC</b> - <b>TCC</b> CC <b>TGTT</b> ACC <b>AA</b>    |  |    |    |   |
| CrIa | AA <b>GAAA</b> - <b>AGG</b> <b>AGG</b> AACTCGGCAAACA-----T <b>AAGCC</b> - <b>TCC</b> CC <b>TGTT</b> ACC <b>AA</b>    |  |    |    |   |
| Clmc | AA <b>GAAA</b> - <b>AGG</b> <b>AGG</b> AACTCGGCAAACA-----C <b>AAGCC</b> - <b>TCC</b> CC <b>TGTT</b> ACC <b>AA</b>    |  |    |    |   |
| Phin | AA <b>AGGA</b> <b>GAG</b> <b>AGG</b> AACTCGGCAAACA-----CC <b>AAGCC</b> - <b>CCC</b> CC <b>TGTT</b> ACC <b>AA</b>     |  |    |    |   |
| Icpu | AA <b>GAAA</b> - <b>AGG</b> <b>AGG</b> AACTCGGCAAACA-----T <b>AAGCC</b> - <b>TCC</b> CC <b>TGTT</b> ACC <b>AA</b>    |  |    |    |   |
| Psto | AA <b>GAAA</b> - <b>AGG</b> <b>AGG</b> AACTCGGCAAACACTTA----C <b>AAGCC</b> - <b>TCC</b> CC <b>TGTT</b> ACC <b>AA</b> |  |    |    |   |
| Cora | AA <b>GAAA</b> - <b>AGG</b> <b>AGG</b> AACTCGGCAAACA-----C <b>AAGCC</b> - <b>TCC</b> CC <b>TGTT</b> ACC <b>AA</b>    |  |    |    |   |
| Eisp | AA <b>GAAA</b> - <b>AGG</b> <b>AGG</b> AACTCGGCAAACA-----C <b>AAGCC</b> - <b>TCC</b> CC <b>TGTT</b> ACC <b>AA</b>    |  |    |    |   |
| Apal | AA <b>GAAA</b> - <b>AGG</b> <b>AGG</b> AACTCGGCAAACA-----C <b>AAGCC</b> - <b>TCC</b> CC <b>TGTT</b> ACC <b>AA</b>    |  |    |    |   |
| EsLu | AA <b>GAAA</b> - <b>GAG</b> <b>AGG</b> AACTCGGCAAACA-----C <b>AAGCC</b> - <b>TCC</b> CC <b>TGTT</b> ACC <b>AA</b>    |  |    |    |   |
| Dape | AA <b>GAAA</b> - <b>AAG</b> <b>AGG</b> AACTCGGCAAACA-----C <b>AAGCC</b> - <b>TCC</b> CC <b>TGTT</b> ACC <b>AA</b>    |  |    |    |   |
| Glse | AA <b>GGAG</b> - <b>AAG</b> <b>AGG</b> AACTCGGCAAAC-----C <b>AAGCC</b> - <b>TCC</b> CC <b>TGTT</b> ACC <b>AA</b>     |  |    |    |   |
| Naar | AA <b>AGAG</b> - <b>AAG</b> <b>AGG</b> AACTCGGCAAACC-----C <b>AAGCC</b> - <b>TCC</b> CC <b>TGTT</b> ACC <b>AA</b>    |  |    |    |   |
| Baoc | AA <b>AGAG</b> - <b>AAG</b> <b>AGG</b> AACTCGGCAAACC-----C <b>AAGCC</b> - <b>TCC</b> CC <b>TGTT</b> ACC <b>AA</b>    |  |    |    |   |
| Opso | AA <b>GGAG</b> - <b>AAG</b> <b>AGG</b> AACTCGGCAAATC-----C <b>AAGCC</b> - <b>TCC</b> CC <b>TGTT</b> ACC <b>AA</b>    |  |    |    |   |
| Alte | AA <b>GGAA</b> - <b>AAG</b> <b>AGG</b> AACTCGGCAAACA-----C <b>AAGCC</b> - <b>TCC</b> CC <b>TGTT</b> ACC <b>AA</b>    |  |    |    |   |
| Plap | AA <b>GGAA</b> - <b>AAG</b> <b>AGG</b> AACTCGGCAAACA-----C <b>AAGCC</b> - <b>TCC</b> CC <b>TGTT</b> ACC <b>AA</b>    |  |    |    |   |

Plal AA**GGGG**-**GAA****AGG**AACTCGGCAAACA-----**CAGCC**-**TCC**CC**TGTT**ACC**AA**  
 Sami AA**GGGG**-**GACA****AGG**AACTCGGCAAACA-----**CAGCC**-**TCC**CC**TGTT**ACC**AA**  
 Rere AA**GGAA**-**GAGA****AGG**AACTCGGCAAACA-----**TGAGCC**-**TCC**CC**TGTT**ACC**AA**  
 Gama AA**GGAG**-**AAGA****AGG**AACTCGGCAAACG-----**CAGCC**-**TCC**CC**TGTT**ACC**AA**  
 Onmy AA**GGAA**-**GAGA****AGG**AACTCGGCAAACA-----**CAGCC**-**TCC**CC**TGTT**ACC**AA**  
 Sasa AA**GGAA**-**GAGA****AGG**AACTCGGCAAACA-----**CAGCC**-**TCC**CC**TGTT**ACC**AA**  
 Cola AA**GGAA**-**GAGA****AGG**AACTCGGCAAACA-----**CAGCC**-**TCC**CC**TGTT**ACC**AA**  
 Dita AA**GGGA**-**GAGA****AGG**AACTCGGCAAGCA-----**CAGCC**-**TCC**CC**TGTT**ACC**AA**  
 Gogr AA**GGAA**-**GAGA****AGG**AACTCGGCAAACA-----**TGAGCC**-**CCC**CC**TGTT**ACC**AA**  
 Chsl AA**GGAA**-**AAA****AGG**AACTCGGCAAACA-----**TGGCC**-**TCC**CC**TGTT**ACC**AA**  
 Atja AA**GGAT**-**GAGA****AGG**AACTCGGCAAACA-----**TAGCC**-**TCC**CC**TGTT**ACC**AA**  
 lido AA**GGAC**-**AAGA****AGG**AACTCGGCAAACA-----**CAGCC**-**TCC**CC**TGTT**ACC**AA**  
 Auja AA**GAGA**-**AGGA****AGG**AACTCGGCAAACC-----**CAGCC**-**CCC**CC**TGTT**ACC**AA**  
 Chag AA**GATA**-**AGGA****AGG**AACTCGGCAAACA-----**CAGCC**-**TCC**CC**TGTT**ACC**AA**  
 Hami AG**GGGG**-**AGGA****AGG**AACTCGGCAATCA-----**GAGCC**-**TCC**CC**TGTT**ACC**AA**  
 Saun AA**AGAG****AGGA****AGG**AACTCGGCAAACCCA-----**CAGCC**-**CCC**CC**TGTT**ACC**AA**  
 Nema AA**TAAA**-**GGGA****AGG**AACTCGGCAAACA-----**CAGCC**-**TCC**CC**TGTT**ACC**AA**  
 Disp AA**TGAG**-**GGGA****AGG**AACTCGGCAAACA-----**CAGCC**-**TCC**CC**TGTT**ACC**AA**  
 Myaf AT**TAAA**-**GGGA****AGG**AACTCGGCAAACA-----**CAGCC**-**TCC**CC**TGTT**ACC**AA**  
 Lagu AA**GAGA**-**GAGA****AGG**AACTCGGCAAACC-----**CAGCC**-**CCC**CC**TGTT**ACC**AA**  
 Trtr AA**GAGA**-**GGGA****AGG**AACTCGGCAAACA-----**TAGCC**-**CCC**CC**TGTT**ACC**AA**  
 Zucr AA**GAGA**-**GGGA****AGG**AACTCGGCAAACA-----**TAGCC**-**CCC**CC**TGTT**ACC**AA**  
 Pxja AA**GAAA**-**AGGA****AGG**AACTCGGCAAACA-----**CAGCC**-**TCC**CC**TGTT**ACC**AA**  
 Pxlo AA**GAAA**-**AGGA****AGG**AACTCGGCAAACA-----**CAGCC**-**TCC**CC**TGTT**ACC**AA**  
 Pctr AA**GAAA**-**AAGA****AGG**AACTCGGCAAACA-----**CAGCC**-**TCC**CC**TGTT**ACC**AA**  
 Apsa AA**GAAA**-**AAGA****AGG**AACTCGGCAAACAC-----**CCC****CAGCC**-**TCC**CC**TGTT**ACC**AA**  
 Cabe AT**GAAG**-**AAA****AGG**AACTCGGCAAACCT-----**AGGCC**-**TCC**CC**TGTT**ACC**AA**  
 Bzze AA**GAGA**-**AGGA****AGG**AACTCGGCAAGCA-----**CAGCC**-**TCC**CC**TGTT**ACC**AA**  
 Siim AA**GGAA**-**GGGA****AGG**AACTCGGCAAACA-----**AAGCC**-**CCC**CC**TGTT**ACC**AA**  
 Ctru AA**GAAA**-**AAGA****AGG**AATTCGGCAAACA-----**CAGCC**-**TCC**CC**TGTT**ACC**AA**  
 Dpbr AA**GGAA**-**AAGA****AGG**AACTCAGCAAACA-----**CAGCC**-**TCC**CC**TGTT**ACC**AA**  
 Caki AA**GGAA**-**AGAA****AGG**AACTCGGCAAACCT-----**CAGCC**-**TCC**CC**TGTT**ACC**AA**  
 Phja AA**GAGA**-**AGGA****AGG**AACTCGGCAAACA-----**CAGCC**-**TCC**CC**TGTT**ACC**AA**  
 Brsp AA**AGGA****GAGA****AGG**AACTCGGCAAACC-----**TAGCC**-**CCC**CC**TGTT**ACC**AA**  
 Gamo AA**GAGA**-**AGGA****AGG**AACTCGGCAAACA-----**CAGCC**-**TCC**CC**TGTT**ACC**AA**  
 Lolo AA**GAGA**-**AGGA****AGG**AACTCGGCAAACA-----**CAGCC**-**TCC**CC**TGTT**ACC**AA**  
 Batr AA**AGAA****GAGGA****AGG**AACTCGGCAAACC-----**TAGCC**-**TCC**CC**TGTT**ACC**AA**  
 Prmy AA**GAAA**-**ATA****AGG**AACTCGGCAAACA-----**TAAATC**-**CCC**CC**TGTT**ACC**AA**  
 Loli AA**AGAT****GGGGA****AGG**AACTCGGCAAACACC-----**CAGCC**-**TCC**CC**TGTT**ACC**AA**  
 Loam AA**GGGG**-**AAGA****AGG**AACTCGGCAAACACACC-----**CAGCC**-**TCC**CC**TGTT**ACC**AA**  
 Chab AA**GAAA**-**GAGA****AGG**AACTCGGCAAACACAT-----**AAGCC**-**TCC**CC**TGTT**ACC**AA**  
 Chto AA**GAAA**-**GAGA****AGG**AACTCGGCAAACACAT-----**AAGCC**-**TCC**CC**TGTT**ACC**AA**  
 Majo AA**GAAA**-**AAGA****AGG**AACTCGGCAAATCAAA---**T**-**GAGCC**-**TCC**CC**TGTT**ACC**AA**  
 Hlst AA**GGAA**-**GAGA****AGG**AACTCGGCAAATC-----**TAGCC**-**CCC**CC**TGTT**ACC**AA**  
 Clpe AA**GAAA**-**GAGA****AGG**AACTCGGCAAACACAT-----**AGGCC**-**TCC**CC**TGTT**ACC**AA**  
 Mlmr AA**GAAA**-**GAGA****AGG**AACTCGGCAAACATACA---**TT****AAGCC**-**TCC**CC**TGTT**ACC**AA**  
 Crcr AA**GGAA**-**AAGA****AGG**AACTCGGCAAACACTC--**CAT****AAGCC**-**TCC**CC**TGTT**ACC**AA**  
 Muce AA**GGAA**-**AAGA****AGG**AACTCGGCAAACACTC-**CA**-**CAGCC**-**TCC**CC**TGTT**ACC**AA**  
 Bege AA**GAAA**-**AAGA****AGG**AACTCGGCAAATTATC--**CAC****AAGCC**-**TCC**CC**TGTT**ACC**AA**  
 Mela AA**GAAA**-**AAGA****AGG**AACTCGGCAAACATA-----**AT****TGGCC**-**TCC**CC**TGTT**ACC**AA**  
 Hats AA**GAAA**-**AAGA****AGG**AACTCGGCAAAAATTCT---**CAGCC**-**TCC**CC**TGTT**ACC**AA**  
 Orla AA**GGAA**-**GAGA****AGG**AACTCGGCAAATATA-----**CC****AAGCC**-**TCC**CC**TGTT**ACC**AA**

Cosa AA**GAAA**-**AAG****AGG**AACTCGGCAAACATAAAAC---C**AAGCC**-**TTC**CC**TGTTT**ACC**AA**  
 Exsp AA**GGAG**-**AAG****AGG**AACTCGGCAAACATATTT---A**CGGCC**-**TCC**CC**TGTTT**ACC**AA**  
 Depa AA**GAAA**-**AAG****AGG**AACTCGGCAAATA-----A**AAGCC**-**TCC**CC**TGTTT**ACC**AA**  
 Rima AA**GGAG**-**CAT****AGG**AACTCGGCAAACACGCAC-A--C**AAGCC**-**TCC**CC**TGTTT**ACC**AA**  
 Fuol AA**GGGG**-**AAG****AGG**AACTCGGCAAATACCCAA-T--T**AAGCC**-**TCC**CC**TGTTT**ACC**AA**  
 Gmaf AA**GGGG**-**GAG****AGG**AACTCGGCAAACAAACC---A**AAGCC**-**TCC**CC**TGTTT**ACC**AA**  
 Xeei AA**AGAG**-**AAG****AGG**AACTCGGCAAACCTGCT---CT**AAGCC**-**TCC**CC**TGTTT**ACC**AA**  
 Pros AA**GAGA**-**AAA****AGG**AACTCGGCAAACA-----T**AAGCC**-**TCC**CC**TGTTT**ACC**AA**  
 Scmi AA**GAGA**-**AAA****AGG**AACTCGGCAAACA-----T**AAGCC**-**TCC**CC**TGTTT**ACC**AA**  
 Rolo AA**GAAA**-**AAG****AGG**AACTCGGCAAACA-----C**AAGCC**-**TCC**CC**TGTTT**ACC**AA**  
 Cere AA**GGAA**-**AAG****AGG**AACTCGGCAAACG-----C**AAGCC**-**CCC**CC**TGTTT**ACC**AA**  
 Daga AA**GGAA**-**GAG****AGG**AACTCGGCAAGCA-----A**AAGCC**-**CCC**CC**TGTTT**ACC**AA**  
 Anco AA**GAAA**-**AAG****AGG**AACTCGGCAAACC-----C**AGGCC**-**TCC**CC**TGTTT**ACC**AA**  
 Dmve AA**AGAG**-**AAG****AGG**AACTCGGCAAACC-----T**GGGCT**-**CCC**CC**TGTTT**ACC**AA**  
 Dmar AA**GAAA**-**AAG****AGG**AACTCGGCAAACC-----T**GGGCT**-**CCC**CC**TGTTT**ACC**AA**  
 Anka AA**GAAA**-**GAG****AGG**AACTCGGCAAACC-----C**AGGCC**-**TCC**CC**TGTTT**ACC**AA**  
 Moja AA**GAAA**-**AAG****AGG**AACTCGGCAAACC-----C**AGGCC**-**TCC**CC**TGTTT**ACC**AA**  
 Hoja AA**GAAA**-**AAG****AGG**AACTCGGCAAACC-----C**AGGCC**-**TCC**CC**TGTTT**ACC**AA**  
 Bede AA**GAGA**-**AAA****AGG**AACTCGGCAAACA-----C**AAGCC**-**TCC**CC**TGTTT**ACC**AA**  
 Bsp AA**GAGA**-**AAA****AGG**AACTCGGCAAACA-----C**AAGCC**-**TCC**CC**TGTTT**ACC**AA**  
 Mysp AA**GAAA**-**AAG****AGG**AACTCGGCAAACA-----C**AGGCC**-**TCC**CC**TGTTT**ACC**AA**  
 Osja AA**GAAA**-**AAG****AGG**AACTCGGCAAACA-----C**AAGCC**-**TCC**CC**TGTTT**ACC**AA**  
 Sgro AA**GAAT**-**AAG****AGG**AACTCGGCAAACA-----C**AAGCC**-**TCC**CC**TGTTT**ACC**AA**  
 Pzpa AA**AGAA**-**AAG****AGG**AACTCGGCAAACC-----A**AAGCC**-**TCC**CC**TGTTT**ACC**AA**  
 Zeja AA**GAAA**-**AAG****AGG**AACTCGGCAAACC-----A**AAGCC**-**TCC**CC**TGTTT**ACC**AA**  
 Znne AA**GAAA**-**AAG****AGG**AACTCGGCAAACACT-----AT**CAGCC**-**TCC**CC**TGTTT**ACC**AA**  
 Zefa AA**GAAA**-**AAG****AGG**AACTCGGCAAAC-----TA**AAGCC**-**TCC**CC**TGTTT**ACC**AA**  
 Acni AA**GAAA**-**AAG****AGG**AACTCGGCAAAC-----CA**AAGCC**-**TCC**CC**TGTTT**ACC**AA**  
 Ncrh AA**GAAA**-**AAG****AGG**AACTCGGCAAAC-----CA**AAGCC**-**TCC**CC**TGTTT**ACC**AA**  
 Agca AA**GAAA**-**GAA****AGG**AACTCGGCAAACACA-----C**AAGCC**-**TCC**CC**TGTTT**ACC**AA**  
 Hydy AA**GGAA**-**AAG****AGG**AACTCGGCAAACA-----T**AAGCC**-**TCC**CC**TGTTT**ACC**AA**  
 Gsac AA**GAAA**-**GAG****AGG**AACTCGGCAAACACAT-----A**AAGCC**-**TCC**CC**TGTTT**ACC**AA**  
 Pevo AA**GGAA**-**AAG****AGG**AACTCGGCAAAC---A-----C**AAGCC**-**TCC**CC**TGTTT**ACC**AA**  
 Hiku AA**GGGT**-**GAG****AGG**AACTCGGCAAACATAAT-AACAC**TAGCC**-**TCC**CC**TGTTT**ACC**AA**  
 Inpa AA**AAAA**-**GAA****AGG**AACTCGGCAACCCCA-----CC**AAGCC**-**CCC**CC**TGTTT**ACC**AA**  
 Auch AA**GAAG**-**GAG****AGG**AACTCGGCAAACACATAT-TCT**AAGCC**-**CCC**CC**TGTTT**ACC**AA**  
 Fico AA**GGGA**-**AAG****AGG**AACTCGGCAAACA-----CC**AAGCC**-**TCC**CC**TGTTT**ACC**AA**  
 Macs AA**GAGA**-**GAG****AGG**AACTCGGCAAACATATTT---G**AAGCC**-**TCC**CC**TGTTT**ACC**AA**  
 Moal AC**CAAT**-**GAG****AGG**AACTCGGCAAACACCT-----C**AGGCC**-**TCC**CC**TGTTT**ACC**AA**  
 Syma AA**TAAAG**-**GAG****AGG**AACTCGGCAAACA-----T**AGGCT**-**CCC**CC**TGTTT**ACC**AA**  
 Maf r AA**GAAA**-**AAG****AGG**AACTCGGCAAACATACCTT--AT**AAGCC**-**TCC**CC**TGTTT**ACC**AA**  
 Dcpe AA**GAAA**-**GAG****AGG**AACTCGGCAAACA-----CCA**AAGCC**-**TCC**CC**TGTTT**ACC**AA**  
 Dct i AA**GAAA**-**GAG****AGG**AACTCGGCAAAC----AC---CT**AAGCC**-**TCC**CC**TGTTT**ACC**AA**  
 Hehi AA**GAAA**-**GAG****AGG**AACTCGGCAAACAAT-----C**AAGCC**-**TCC**CC**TGTTT**ACC**AA**  
 Stam AA**AGAA**-**GAG****AGG**AACTCGGCAAACACATTT---A**AAGCC**-**TCC**CC**TGTTT**ACC**AA**  
 Hogi AA**GAAA**-**AAG****AGG**AACTCGGCAAACA-----CACC**AAGCC**-**TCC**CC**TGTTT**ACC**AA**  
 Erzo AA**GAAA**-**GAG****AGG**AACTCGGCAAACATAC-----C**AAGCC**-**TCC**CC**TGTTT**ACC**AA**  
 Hxot AA**GAAA**-**GAG****AGG**AACTCGGCAAACACAT-----A**AAGCC**-**TCC**CC**TGTTT**ACC**AA**  
 Core AA**GAAA**-**GAG****AGG**AACTCGGCAAACA-----C**AAGCC**-**TCC**CC**TGTTT**ACC**AA**  
 Apve AA**AAAA**-**GAG****AGG**AACTCGGCAAACACC-----T**AAGCC**-**TCC**CC**TGTTT**ACC**AA**  
 Lat j AA**GAAA**-**AAG****AGG**AACTCGGCAAACA-----T**AAGCC**-**TCC**CC**TGTTT**ACC**AA**  
 Laja AA**GAAA**-**AAG****AGG**AACTCGGCAAACAC-----AT**AAGCC**-**TCC**CC**TGTTT**ACC**AA**

Syja AA**GAAA**-**AAG****AGG**AACTCGGCAAACA-----CAT**AAGCC**-**TCC**CC**TGTTT**ACC**AA**  
 Epme AA**GAAA**-**GAG****AGG**AACTCGGCAAACACA-----CT**CAGCC**-**TCC**CC**TGTTT**ACC**AA**  
 Grse AA**GGAA**-**AAG****AGG**AACTCGGCAAACACCCAT---TA**AAGCC**-**TCC**CC**TGTTT**ACC**AA**  
 Clja AA**GAAG**-**GAG****AGG**AACTCGGCAAACA-----C**TGGCC**-**TCC**CC**TGTTT**ACC**AA**  
 Ogcy AA**GAAA**-**AAG****AGG**AACTCGGCAAACATATCT-CTTA**AAGCC**-**TCC**CC**TGTTT**ACC**AA**  
 Plna AA**GAAA**-**AAG****AGG**AACTCGGCAAATATACCCT-ACT**AGGCC**-**TCC**CC**TGTTT**ACC**AA**  
 Lema AA**GAAA**-**GAG****AGG**AACTCGGCAAACACAT-----G**AAGCC**-**TCC**CC**TGTTT**ACC**AA**  
 Etzo AA**GAAA**-**GAG****AGG**AACTCGGCAAACACA-----TC**AAGCC**-**TCC**CC**TGTTT**ACC**AA**  
 Apse AA**GAAA**-**AAG****AGG**AACTCGGCAAACACTT-----C**TAGCC**-**TCC**CC**TGTTT**ACC**AA**  
 Epde AA**AGAA****AAG****AGG**AACTCGGCAAACACA-----TA**AAGCC**-**TCC**CC**TGTTT**ACC**AA**  
 Slja AA**GAAA**-**AAG****AGG**AACTCGGCAAACACC-----TA**GAGCC**-**TCC**CC**TGTTT**ACC**AA**  
 Bsja AA**GAAA**-**GAG****AGG**AACTCGGCAAA-----TA**AAGCC**-**TCC**CC**TGTTT**ACC**AA**  
 Ecna AA**GAAT**-**GAG****AGG**AACTCGGCAAACAC-----ATG**AAGCC**-**TCC**CC**TGTTT**ACC**AA**  
 Cohi AA**GAAG**-**GAG****AGG**AACTCGGCAAA-----AC**AAGCC**-**TCC**CC**TGTTT**ACC**AA**  
 Caar AA**GAAA**-**GAG****AGG**AACTCGGCAAACAAA---TTCC**AAGCC**-**TCC**CC**TGTTT**ACC**AA**  
 Came AA**AGAA****GAG****AGG**AACTCGGCAAACAT----TTCTC**AAGCC**-**TCC**CC**TGTTT**ACC**AA**  
 Mema AA**GAAA**-**GAG****AGG**AACTCGGCAAACA-----CCTA**AAACC**-**CCG**CC**TGTTT**ACC**AA**  
 Lenu AA**AAGA**-**AGG****AGG**AACTCGGCAAACAATCCACCTA**AAGCC**-**TCC**CC**TGTTT**ACC**AA**  
 Brja AA**GAAG**-**GAG****AGG**AACTCGGCAAACC----AACC**CAGCC**-**TCC**CC**TGTTT**ACC**AA**  
 Plma AA**AGAA****GAG****AGG**AACTCGGCAAACATA---ACTT**AAGCC**-**TCC**CC**TGTTT**ACC**AA**  
 Emst AG**GAAA**-**GAG****AGG**AACTCGGCAAACA-----CATG**AAGCC**-**TCC**CC**TGTTT**ACC**AA**  
 Ptti AA**GAAA**-**GAG****AGG**AACTCGGCAAACAC-----ATAG**AAGCC**-**TCC**CC**TGTTT**ACC**AA**  
 Losu CA**GAAA**-**GAG****AGG**AACTCGGCAAACA-----TT**TAGCC**-**TCC**CC**TGTTT**ACC**AA**  
 Geoy AA**GAAA**-**GAG****AGG**AACTCGGCAAACAC-----ATG**AAGCC**-**TCC**CC**TGTTT**ACC**AA**  
 Dipi AA**GAAA**-**AAG****AGG**AACTCGGCAAACACA-----TG**AAGCC**-**TCC**CC**TGTTT**ACC**AA**  
 Pama AA**GGGA**-**AGG****AGG**AACTCGGCAAACACT--T---A**AAGCC**-**TCC**CC**TGTTT**ACC**AA**  
 Leob AA**GAAA**-**GAG****AGG**AACTCGGCAAACATC-----T**GAGCC**-**TCC**CC**TGTTT**ACC**AA**  
 Neba AA**GAAA**-**AAG****AGG**AACTCGGCAAAAAAC-----C**TAGCC**-**TCC**CC**TGTTT**ACC**AA**  
 Pdpi AA**GAAA**-**AAG****AGG**AACTCGGCAAACACTAAC---T**AAGCC**-**TCC**CC**TGTTT**ACC**AA**  
 Nimi CA**GAAA**-**AAG****AGG**AACTCGGCAAACACA-----TA**AAGCC**-**TCC**CC**TGTTT**ACC**AA**  
 Uptr AA**GAGA**-**AAG****AGG**AACTCGGCAAATTAA-----AT**AAGCC**-**TCC**CC**TGTTT**ACC**AA**  
 Pesc AA**GAAA**-**GAG****AGG**AACTCGGCAAACAC-----T**ATGCC**-**TCC**CC**TGTTT**ACC**AA**  
 Baar AA**GAAA**-**AAG****AGG**AACTCGGCAAACACATAA---TT**TAGTC**-**CCG**CC**TGTTT**ACC**AA**  
 Moar AA**GAAA**-**GAG****AGG**AACTCGGCAAACACAT-----A**AAGCC**-**TCC**CC**TGTTT**ACC**AA**  
 Toja AA**GAAA**-**AAG****AGG**AACTCGGCAAACACAT-----G**AAGCC**-**TCC**CC**TGTTT**ACC**AA**  
 Chau AA**GAAA**-**AAG****AGG**AACTCGGCAAAT-----CA**AGACC**-**CCG**CC**TGTTT**ACC**AA**  
 Chse AA**GAAA**-**GAA****AGG**AACTCGGCAAACA-----CACT**TGGCC**-**TCC**CC**TGTTT**ACC**AA**  
 Enar AA**GAAA****AAG****AGG**AACTCGGCAAACA-----CATG**AAGCC**-**TCC**CC**TGTTT**ACC**AA**  
 Hpty AA**GAAA**-**AAG****AGG**AACTCGGCAAACAC-----ACA**AAGCC**-**TCC**CC**TGTTT**ACC**AA**  
 Nana AA**GAAA**-**AAG****AGG**AACTCGGCAAACAC-----ATA**AAGCC**-**TCC**CC**TGTTT**ACC**AA**  
 Mcst AA**GAAA**-**AAG****AGG**AACTCGGCAAACA-----CATA**AAGCC**-**TCC**CC**TGTTT**ACC**AA**  
 Rhox AA**GAGA**-**AAG****AGG**AACTCGGCAAACAC-----AT**TGGCC**-**TCC**CC**TGTTT**ACC**AA**  
 Opfa AA**GAAA**-**AAG****AGG**AACTCGGCAAACAC-----A**AAGCC**-**TCC**CC**TGTTT**ACC**AA**  
 Paar AA**GGAA**-**AAG****AGG**AACTCGGCAAACCC-----A**CAGCC**-**TCC**CC**TGTTT**ACC**AA**  
 Gozo AA**GAAA**-**GAG****AGG**AACTCGGCAAACACA-----TG**AAGCC**-**TCC**CC**TGTTT**ACC**AA**  
 Ackr AA**GGGA**-**GAG****AGG**AACTCGGCAAACA-----C**ATGCC**-**TCC**CC**TGTTT**ACC**AA**  
 Elev AA**AGAA**-**AAG****AGG**AACTCGGCAAACA-----C**AAGCC**-**CCG**CC**TGTTT**ACC**AA**  
 Trdu AA**GAAA**-**AAG****AGG**AACTCGGCAAACA-----C**AAGCC**-**TCC**CC**TGTTT**ACC**AA**  
 Amoc AA**GAAA**-**AAG****AGG**AACTCGGCAAT--CATAA---T**AAGCC**-**TCC**CC**TGTTT**ACC**AA**  
 Hame AA**GAGA**-**AAG****AGG**AACTCGGCAAACACC-----TC**AAGCC**-**TCC**CC**TGTTT**ACC**AA**  
 Chso AA**AGGA**-**GAG****AGG**AACTCGGCAAACATC----CAC**AAGCC**-**TCC**CC**TGTTT**ACC**AA**  
 Lyto AA**GAAA**-**GAG****AGG**AACTCGGCAAACACACA-----C**AAGCC**-**TCC**CC**TGTTT**ACC**AA**

|      |    |      |       |     |                    |       |       |       |      |    |       |     |    |
|------|----|------|-------|-----|--------------------|-------|-------|-------|------|----|-------|-----|----|
| Encr | AA | GAGA | -GAGA | AGG | AACTCGGCAAACACA    | ----  | TCA   | AAGCC | -TCC | CC | TGTTT | ACC | AA |
| Bvar | AA | GAAA | -GAGA | AGG | AACTCGGCAAAC       | ----- | ATA   | AAGCC | -TCC | CC | TGTTT | ACC | AA |
| Noco | AA | GGGG | -GAGA | AGG | AACTCGGCAAACA      | ----- | CATA  | AAGCC | -TCC | CC | TGTTT | ACC | AA |
| Chsp | AA | GGGG | -AAGA | AGG | AACTCGGCAAAC       | ----- | AT    | AAGCC | -TCC | CC | TGTTT | ACC | AA |
| Arja | AA | GAAA | -GAGA | AGG | AACTCGGCAAACA      | ----- | CATT  | AAGCC | -TCC | CC | TGTTT | ACC | AA |
| Pase | AA | GGAA | -AAGA | AGG | AACTCGGCAAAC       | ----- | TATC  | AAGCC | -CCG | CC | TGTTT | ACC | AA |
| Trel | AA | GAAT | -AAGA | AGG | AACTCGGCAAAC       | ----- | CCC   | TAGCC | -CCG | CC | TGTTT | ACC | AA |
| Lifa | AA | GGAA | -GAGA | AGG | AACTCGGCAAAC       | ----- | CTA   | AAGCC | -TCC | CC | TGTTT | ACC | AA |
| Acur | AA | GGAA | -GAGA | AGG | AACTAGGCAA         | ----- | CACCT | TAGCC | -TCC | CC | TGTTT | ACC | AA |
| Ampe | AA | GAAA | -AAGA | AGG | AACTCGGCAAACA      | ----- | CATG  | AAGCC | -TCC | CC | TGTTT | ACC | AA |
| Urja | AA | AAAG | -AAGA | AGG | AACTCGGCAAACA      | ----- | CCC   | AAGCC | -TCC | CC | TGTTT | ACC | AA |
| Enet | AA | GGGA | -AAGA | AGG | AACTCGGCAAAC       | ----- | CC    | CAGCC | -TCC | CC | TGTTT | ACC | AA |
| Ptbr | AA | GAGA | -AAGA | AGG | AACTCGGCAAAC       | ----- | TTAT  | AAGCC | -TCC | CC | TGTTT | ACC | AA |
| Safa | AA | AGAG | -AGGA | AGG | AACTCGGCAAG        | ----- | ATAAC | AAGCC | -TCC | CC | TGTTT | ACC | AA |
| Icae | AA | GAAG | -AAGA | AGG | AACTCGGCAAACATA    | ----- | CC    | AAGCC | -TCC | CC | TGTTT | ACC | AA |
| Asmi | AA | GAAA | -AGGA | AGG | AACTCGGCAAAC       | ----- | AC    | AAGCC | -TCC | CC | TGTTT | ACC | AA |
| Foal | AA | AGGT | -TGG  | AGG | AACTCGGCAAAC       | ----- | CC    | AAGCC | -TCC | CC | TGTTT | ACC | AA |
| Drze | AA | GAGA | -AAGA | AGG | AACTCGGCAAATAT     | ----- | TG    | TAGCC | -TCC | CC | TGTTT | ACC | AA |
| Rhas | AG | GAAA | -AAGA | AGG | AACTCGGCAA         | ----- | CAT   | TAGCC | -TCC | CC | TGTTT | ACC | AA |
| Elac | AA | GAAA | -AAGA | AGG | AACTCGGCAA         | ----- | CAC   | TGGCC | -TCC | CC | TGTTT | ACC | AA |
| Kugu | AA | GAAA | -AAGA | AGG | AACTCGGCAAACA      | ----- | CCTC  | TAGCC | -CCG | CC | TGTTT | ACC | AA |
| Plor | AA | GAAA | GAGA  | AGG | AACTCGGCAAACA      | ----- | TAT   | ACGCC | -TCC | CC | TGTTT | ACC | AA |
| Sgun | AA | GAAA | -GAGA | AGG | AACTCGGCAAAC       | ----- | ATG   | AAGCC | -TCC | CC | TGTTT | ACC | AA |
| Zaco | AA | GAAA | -GAGA | AGG | AACTCGGCAAAC       | ----- | ATG   | AAGCC | -TCC | CC | TGTTT | ACC | AA |
| Zbfl | AA | GAAA | -GAGA | AGG | AACTCGGCAAAC       | ----- | TAC   | AAGCC | -TCC | CC | TGTTT | ACC | AA |
| Spba | AA | GAAA | -AAGA | AGG | AATTCAGCAAACCA     | ----  | TTAC  | TAGCC | -TCC | CC | TGTTT | ACC | AA |
| Game | AA | GAAA | -AAGA | AGG | AACTCGGCAAAC       | ----- | ACC   | AAGCC | -TCC | CC | TGTTT | ACC | AA |
| Thth | AA | GAAA | -AAGA | AGG | AACTCGGCAAACA      | ----- | TACC  | AAGCC | -TCC | CC | TGTTT | ACC | AA |
| Xigl | AA | AGAA | GAGA  | AGG | AACTCGGCAAACA      | ----- | CATG  | AAGCC | -TCC | CC | TGTTT | ACC | AA |
| Hyja | AA | GAAA | -AAGA | AGG | AACTCGGCAAAC       | ----- | AG    | AAGCC | -TCC | CC | TGTTT | ACC | AA |
| Psan | AA | GAAA | -AAGA | AGG | AACTCGGCAAATA      | ----- | TTA   | AAGCC | -TCC | CC | TGTTT | ACC | AA |
| Cupa | AA | GAAA | -AAGA | AGG | AACTCGGCAAACAT     | ----  | TTTCC | AAGCC | -TCC | CC | TGTTT | ACC | AA |
| Mpch | AA | GAAA | -AAGA | AGG | AACTCGGCAAACA      | ----- | T     | AAGCC | -TCC | CC | TGTTT | ACC | AA |
| Char | AA | GAAA | -AAGA | AGG | AACTCGGCAAACACC    | ----- | CT    | AAGCC | -TCC | CC | TGTTT | ACC | AA |
| Pser | AG | GAAA | -AAGA | AGG | AACTCGGCAAATACACAA | ----  | C     | AAGCC | -TCC | CC | TGTTT | ACC | AA |
| Prol | AG | GGGG | -GAGA | AGG | AACTCGGCAAACATACC  | ----  | CC    | AAGCC | -TCC | CC | TGTTT | ACC | AA |
| Plbi | AG | GGGG | -GAGA | AGG | AACTCGGCAAACATACCC | ----  | C     | AAGCC | -TCC | CC | TGTTT | ACC | AA |
| Calu | AA | GAGA | -GAGA | AGG | AACTCGGCAAACA      | ----- | ATG   | AAGCC | -TCC | CC | TGTTT | ACC | AA |
| Papa | AA | GGAC | -GGG  | AGG | AACTCGGCAAATA      | ----- | CT    | TAGCC | -TCC | CC | TGTTT | ACC | AA |
| Sufr | AA | GGGA | -GAGA | AGG | AACTCGGCAA         | ----- | CAC   | AAGCC | -TCC | CC | TGTTT | ACC | AA |
| Stci | AA | GAGA | -AAGA | AGG | AACTCGGCAAACA      | ----- | C     | AAGCT | -TCC | CC | TGTTT | ACC | AA |
| Taru | AA | GAAA | -AAGA | AGG | AACTCGGCAAAC       | ----- | CA    | AAGCC | -TCC | CC | TGTTT | ACC | AA |
| Rala | AA | GAAA | -AAGA | AGG | AACTCGGCAAACATA    | ----  | CTC   | AAGCC | -TCC | CC | TGTTT | ACC | AA |

\* \* \* \* \*

\* \* \* \* \*

|      | 34'   | 35  | !       | HVR         | !     |
|------|-------|-----|---------|-------------|-------|
| Scca | AAACA | CCG | CCTCTTG | CTTA        | ----- |
| Muma | AAACA | TCG | CCTCTTG | TT - A - AA | ----- |
| Erca | AAACA | TCG | CCTTCAG | CTAAC       | ----- |
| Pose | AAACA | TCG | CCTTCAG | CTTT        | ----- |
| Actr | AAACA | TCG | CCTCTTG | CAAA        | ----- |
| Scal | AAACA | TCG | CCTCTTG | CAAACC      | ----- |
| Posp | AAACA | TCG | CCTCTTG | CAAACAA     | ----- |
| Atsp | AAACA | TCG | CCTCTTG | CAAACACCA   | ----- |
| Leoc | AAACA | TCG | CCTCTTG | CNAACA      | ----- |
| Amca | AAACA | TCG | CCTCTTG | CAATCC      | ----- |
| Osbi | AAACA | TGG | CCTCTTG | CAAACCCC    | ----- |
| Pabu | AAACA | TGG | CCTCTTG | C - - AACC  | ----- |
| Hial | AAACA | TCG | CCTCTTG | CAAAAA      | ----- |
| Elha | AAACA | TCG | CCTCTTG | CAAAACA     | ----- |
| Mlcy | AAACA | TCG | CCTCTTG | CGAACAA     | ----- |
| Algl | AAACA | TCG | CCTCTTG | CTAAAA      | ----- |
| Ptgi | AAACA | TCG | CCTCTTG | CTAAA       | ----- |
| Alaf | AAACA | TCG | CCTCTTG | CTAAAA      | ----- |
| Nock | AAACA | TCG | CCTCTTG | CTAAAA      | ----- |
| Anja | AAACA | TCG | CCTCTTG | CTAACAA     | ----- |
| Gyki | AAACA | TCG | CCTCTTG | CTAATA      | ----- |
| Syka | AAACA | TCG | CCTCTTG | CCAACAA     | ----- |
| Opma | AAACA | TCG | CCTCTTG | CTAAGA      | ----- |
| Comy | AAACA | CCG | CCTCCTG | C - AAATA   | ----- |
| Sasp | AAACA | TCG | CCTCTTG | CTAATAA     | ----- |
| Eupe | AAACA | CCG | CCTCTTG | CAACAAC     | ----- |
| Enja | AAACA | TCG | CCTCTTG | CA - - T    | ----- |
| Same | AAACA | TCG | CCTCCTG | CCACCAC     | ----- |
| Chch | AAACA | TCG | CCTTCTG | CCAA - AA   | ----- |
| Grgr | AAACA | TCG | CCTCCTG | CAAAAA      | ----- |
| Caau | AAACA | TCG | CCTCCTG | CAACACA     | ----- |
| Cyca | AAACA | TCG | CCTCCTG | CAACA       | ----- |
| Dare | AAACA | TCG | CCTCCTG | ACAT        | ----- |
| Cost | AAACA | TCG | CCTCCTG | CA - AA     | ----- |
| Leec | AAACA | TCG | CCTCCTG | CAAACC      | ----- |
| CrIa | AAACA | TCG | CCTCCTG | CAAACC      | ----- |
| Clmc | AAACA | TCG | CCTCCCG | CAAAAA      | ----- |
| Phin | AAACA | TCG | CCTCCTG | CTAACCTT    | ----- |
| Icpu | AAACA | TCG | CCTCCTG | CAAAAA      | ----- |
| Psto | AAACA | TCG | CCTCCTG | CAAAAA      | ----- |
| Cora | AAACA | TCG | CCTCCCG | CAAAAAT     | ----- |
| Eisp | AAACA | TCG | CCTCCCG | CAAAA       | ----- |
| Apal | AAACA | TCG | CCTCCTG | CAAAAA      | ----- |
| EsLu | AAACA | CCG | CCTCTTG | T - - CT    | ----- |
| Dape | AAACA | TCG | CCTCTTG | C - - CAAC  | ----- |
| Glse | AAACA | TCG | CCTCTTG | CAA - - TCC | ----- |
| Naar | AAACA | TCG | CCTCTTG | C - AAAT    | ----- |
| Baoc | AAACA | TCG | CCTCTTG | CAAATTT     | ----- |
| Opso | AAACA | TCG | CCTCTTG | C - - A     | ----- |
| Alte | AAACA | CCG | CCTCCTG | CAAATCA     | ----- |
| Plap | AAACA | CCG | CCTCCTG | CAAAT       | ----- |



|      |       |     |         |                                              |       |
|------|-------|-----|---------|----------------------------------------------|-------|
| Plal | AAACA | TCG | CCTCTTG | ATCACA                                       | ----- |
| Sami | AAACA | TCG | CCTCTTG | A-GA--A                                      | ----- |
| Rere | AAACA | TCG | CCTCTTG | A--ATA                                       | ----- |
| Gama | AAACA | TCG | CCTCTTG | GTA                                          | ----- |
| Onmy | AAACA | TCG | CCTCTTG | C--AAAT                                      | ----- |
| Sasa | AAACA | TCG | CCTCTTG | TAAATC--A                                    | ----- |
| Cola | AAACA | TCG | CCTCTTG | CAAA--T                                      | ----- |
| Dita | AAACA | TCG | CCTCTTG | CTGAAC                                       | ----- |
| Gogr | AAACA | TCG | CCTCTTG | CCTAAA                                       | ----- |
| Chsl | AAACA | TCG | CCTCTTG | TAACACCCTCATAAGAGGTCTGCCTGCCAGTGACAATTGTAAAC |       |
| Atja | AAACA | TCG | CCTCTTG | CGAACCA                                      | ----- |
| Iido | AAACA | TCG | CCTCTTG | C-AAAC                                       | ----- |
| Auja | AAACA | TCG | CCTCTTG | CAAAATC                                      | ----- |
| Chag | AAACA | TCG | CCTCTTG | T--AAAC                                      | ----- |
| Hami | AAACA | TCG | CCTCTTG | C--AAAA                                      | ----- |
| Saun | AAACA | TCG | CCTCTTG | CAAGATC                                      | ----- |
| Nema | AAACA | TCG | CCTCTTG | CAAAAA                                       | ----- |
| Disp | AAACA | TCG | CCTCTTG | CAAAAC                                       | ----- |
| Myaf | AAACA | TCG | CCTCTTG | CAAAATG                                      | ----- |
| Lagu | AAACA | CCG | CCTCTTG | C-AA                                         | ----- |
| Trtr | AAACA | TCA | CCTCTTG | C-AAT-T                                      | ----- |
| Zucr | AAACA | TCA | CCTCTTG | CAAG                                         | ----- |
| Pxja | AAACA | TCG | CCTCTTG | T-A-TAT                                      | ----- |
| Pxlo | AAACA | TCG | CCTCTTG | T--A                                         | ----- |
| Pctr | AAACA | TCG | CCTCTTG | TAAC--A                                      | ----- |
| Apsa | AAACA | CCG | CCTCTTG | C-AAAAC                                      | ----- |
| Cabe | AAACA | TCG | CCTCCCG | C-GCA-C                                      | ----- |
| Bzze | AAACA | TCG | CCTCTTG | C-AAA-G                                      | ----- |
| Siim | AAACA | TCG | CCTCTTG | C-AAA-A                                      | ----- |
| Ctru | AAACA | TCG | CCTCTTG | CAAAAAT                                      | ----- |
| Dpbr | AAACA | TCG | CCTCTTG | CAAA--A                                      | ----- |
| Caki | AAACA | TCG | CCTCTTG | ACCCAC                                       | ----- |
| Phja | AAACA | TCG | CCTCTTG | CTTAAG                                       | ----- |
| Brsp | AAACA | TCG | CCTCTCG | ACTC                                         | ----- |
| Gamo | AAACA | TCG | CCTCTTG | CTCC                                         | ----- |
| Lolo | AAACA | TCG | CCTCTTG | GAC                                          | ----- |
| Batr | AAACA | TCG | CTTCTTG | CAC                                          | ----- |
| Prmy | AAACA | TCG | CTTCTTG | A                                            | ----- |
| Loli | AAACA | TCG | CCTCTTG | TACCCTA                                      | ----- |
| Loam | AAACA | TCG | CCTCTTG | TAATT                                        | ----- |
| Chab | AAACA | TCG | CCTCTTG | CATAAA                                       | ----- |
| Chto | AAACA | TCG | CCTCTTG | CATAA                                        | ----- |
| Majo | AAACA | TCG | CCTCTTG | CCACAA                                       | ----- |
| Hlst | AAACA | TCG | CCTCTTG | TAATA                                        | ----- |
| Clpe | AAACA | TCG | CCTCTTG | CAATCAG                                      | ----- |
| Mlmr | AAACA | TCG | CCTCTTG | CAATCA                                       | ----- |
| Crcr | AAACA | TCG | CCTCTTG | TAAACC                                       | ----- |
| Muce | AAACA | TCG | CCTCTTG | TTA                                          | ----- |
| Bege | AAACA | TCG | CCTCTTG | TCA                                          | ----- |
| Mela | AAACA | TCG | CCTCTTG | ATCCCCT                                      | ----- |
| Hats | AAACA | TCG | CCTCTTG | TCAA-A                                       | ----- |
| Orla | AAACA | TCG | CCTCTTG | TAAAG                                        | ----- |

|      |       |     |         |                |
|------|-------|-----|---------|----------------|
| Cosa | AAACA | CCG | CCTCTTG | CAA--T-----    |
| Exsp | AAACA | CCG | CCTCTTG | CTAAAA-----    |
| Depa | AAACA | CCG | CCTCTTG | CAACTC-----    |
| Rima | AAACA | TCG | CCTCTTG | TAAT-----      |
| Fuol | AAACA | TCG | CCTCTTG | AATTAA-----    |
| Gmaf | AAACA | TCG | CCTTTTG | AAC-C-----     |
| Xeei | AAACA | TCG | CCTCTTG | AAAATCC-----   |
| Pros | AAACA | TCG | CCTCTTG | TAGAC-----     |
| Scmi | AAACA | CCG | CCTCTTG | CCAACA-----    |
| Rolo | AAACA | TCG | CCTCTTG | CAACAA-----    |
| Cere | AAACA | TCG | CCTCTTG | T-AAA-A-----   |
| Daga | AAACA | TCG | CCTCTTG | CAGCAA-----    |
| Anco | AAACA | TCG | CCTCTTG | CAAAA-ACA----- |
| Dmve | AAACA | TCG | CCTCTTG | CAAACAA-----   |
| Dmar | AAACA | TCG | CCTCTTG | C-AACT-----    |
| Anka | AAACA | TCG | CCTCTTG | CAAAAA-----    |
| Moja | AAACA | TCG | CCTCTTG | CA-A-AA-----   |
| Hoja | AAACA | TCG | CCTCTTG | CAAA--A-----   |
| Bede | AAACA | TCG | CCTCTTG | CA-----        |
| Besp | AAACA | TCG | CCTCTTG | C-AAAAC-----   |
| Mysp | AAACA | TCG | CCTCTTG | CAAAAA-----    |
| Osja | AAACA | TCG | CCTCTTG | CA--A-----     |
| Sgro | AAACA | TCG | CCTCTTG | CAAAAA-----    |
| Pzpa | AAACA | TCG | CCTCTTG | AACTAT-----    |
| Zeja | AAACA | TCG | CCTCTTG | AATAAT-----    |
| Zzne | AAACA | TCG | CCTCTTG | A--AT-----     |
| Zefa | AAACA | TCG | CCTCTTG | A-ATAAA-----   |
| Acni | AAACA | TCG | CCTCTTG | AAT-----       |
| Ncrh | AAACA | TCG | CCTCTTG | AATA-----      |
| Agca | AAACA | TCG | CCTCTTG | CAATCA-----    |
| Hydy | AAACA | TCG | CCTCTTG | AAAC-----      |
| Gsac | AAACA | TCG | CCTCTTG | TAT--TC-----   |
| Pevo | AAACA | TCG | CCTCTTG | C-AG-A-----    |
| Hiku | AAACA | CCG | CCTCTTG | CATA-AC-----   |
| Inpa | AAACA | TCG | CCTCTTG | ACT-----       |
| Auch | AAACA | CCG | CCTCTTG | CTGAT-----     |
| Fico | AAACA | TCG | CCTCTTG | CTAAAAC-----   |
| Macs | AAACA | TCG | CCTCTTG | C--AAAA-----   |
| Moal | AAACA | TCA | CCTCCTG | CAAACTT-----   |
| Syma | AAACA | TCG | CCTCTTG | CCCCCCC-C----- |
| Mafr | AAACA | TCG | CCTCTTG | CAAC--A-----   |
| Dcpe | AAACA | TCG | CCTCTTG | C-AAAT-----    |
| Dcti | AAACA | TCG | CCTCTTG | CAAAAT-----    |
| Hehi | AAACA | TCG | CCTCTTG | CAAA-----      |
| Stam | AAACA | TCG | CCTCTTG | CAAAAAT-----   |
| Hogi | AAACA | TCG | CCTCTTG | T--AAC-----    |
| Erzo | AAACA | TCG | CCTCTTG | CAAAC-T-----   |
| Hxot | AAACA | TCG | CCTCTTG | CAAAC-T-----   |
| Core | AAACA | TCG | CCTCTTG | TATCAT-----    |
| Apve | AAACA | TCG | CCTCTTG | CAAACCC-----   |
| Latj | AAACA | TCG | CCTCTTG | TACAACC-----   |
| Laja | AAACA | TCG | CCTCTTG | CAAAAC-----    |

|      |       |     |         |           |       |
|------|-------|-----|---------|-----------|-------|
| Syja | AAACA | TCG | CCTCTTG | CAAAAA    | ----- |
| Epme | AAACA | CCG | CCTCTTG | -TAAAC    | ----- |
| Grse | AAACA | TCG | CCTCTTG | CGACAA    | ----- |
| Clja | AAACA | CCG | CCTCTTG | CAA-AT    | ----- |
| Ogcy | AAACA | TCG | CCTCTTG | TCCAC     | ----- |
| Plna | AAACA | TCG | CCTCTTG | CTT-TAC   | ----- |
| Lema | AAACA | TCG | CCTCTTG | CTGAAA    | ----- |
| Etzo | AAACA | TCG | CCTCTTG | TAAGAC    | ----- |
| Apse | AAACA | TCG | CCTCTTG | C--AA     | ----- |
| Epde | AAACA | TCG | CCTCTTG | CAAA-AC   | ----- |
| Slja | AAACA | TCG | CCTCTTG | C--A-AA   | ----- |
| Bsja | AAACA | TCG | CCTCTTG | C-AAAAT   | ----- |
| Ecna | AAACA | TCG | CCTCTTG | CAAAAAT   | ----- |
| Cohi | AAACA | TCG | CCTCTTG | C-AAAAATA | ----- |
| Caar | AAACA | TCG | CCTCTTG | CAAA-A    | ----- |
| Came | AAACA | TCG | CCTCTTG | CAAAACC   | ----- |
| Mema | AAACA | TCG | CCTCTTG | C-AAT-A   | ----- |
| Lenu | AAACA | TCG | CCTCTTG | C-TA--A   | ----- |
| Brja | AAACA | TCG | CCTCTTG | CCA--G    | ----- |
| Plma | AAACA | TCG | CCTCTTG | CAATG-C   | ----- |
| Emst | AAACA | TCG | CCTCTTG | C-AAAA    | ----- |
| Ptti | AAACA | TCG | CCTCTTG | CAAAAT    | ----- |
| Losu | AAACA | TCG | CCTCTTG | TAAGCAA   | ----- |
| Geoy | AAACA | TCG | CCTCTTG | CA--A     | ----- |
| Dipi | AAACA | TCG | CCTCTTG | CAAAAA    | ----- |
| Pama | AAACA | TCG | CCTCTTG | C-AATAA   | ----- |
| Leob | AAACA | TCG | CCTCTTG | C-AAAAT   | ----- |
| Neba | AAACA | TCG | CCTCTTG | CAAA      | ----- |
| Pdpl | AAACA | TCG | CCTCTTG | C-TA      | ----- |
| Nimi | AAACA | TCG | CCTCTTG | CAATCA    | ----- |
| Uptr | AAACA | TCG | CCTCTTG | C-A--A    | ----- |
| Pesc | AAACA | TCG | CCTCTTG | CAAA-A    | ----- |
| Baar | AAACA | CCG | CCTTTTG | CAAAT-CCA | ----- |
| Moar | AAACA | TCG | CCTCTTG | CAAAAT    | ----- |
| Toja | AAACA | TCG | CCTCTTG | TAAAC     | ----- |
| Chau | AAACA | CCG | CCTCTTG | C--AAAA   | ----- |
| Chse | AAACA | TCG | CCTCTTG | C--AAA    | ----- |
| Enar | AAACA | TCG | CCTCTTG | CAAAAT    | ----- |
| Hpty | AAACA | TCG | CCTCTTG | CAAA-A    | ----- |
| Nana | AAACA | CCG | CCTCTTG | CAAAC     | ----- |
| Mcst | AAACA | TCG | CCTCTTG | C-AAAA    | ----- |
| Rhox | AAACA | TCG | CCTCTTG | C-AAAGC   | ----- |
| Opfa | AAACA | TCG | CCTCTTG | C-AAA-A   | ----- |
| Paar | AAACA | CCG | CCTCTTG | CA--A     | ----- |
| Gozo | AAACA | TCG | CCTCTTG | C--AAAA   | ----- |
| Ackr | AAACA | TCG | CCTCTTG | CAAAAT    | ----- |
| Elev | AAACA | TCG | CCTCTTG | AACCC     | ----- |
| Trdu | AAACA | TCG | CCTCTTG | AACC      | ----- |
| Amoc | AAACA | TCG | CCTCTTG | A--AAAA   | ----- |
| Hame | AAACA | TCG | CCTCTTG | C-AAAAT   | ----- |
| Chso | AAACA | TCG | CCTCTTG | C-AAAAT   | ----- |
| Lyto | AAACA | TCG | CCTCTTG | CAA       | ----- |

|      |       |     |         |       |          |          |
|------|-------|-----|---------|-------|----------|----------|
| Encr | AAACA | TCG | CCTCTTG | CAA   | ACT      | -----    |
| Bvar | AAACA | TCG | CCTCTTG | TAA   | ATA      | -----    |
| Noco | AAACA | TCG | CCTCTTG | C     | --AA     | -----    |
| Chsp | AAACA | TCG | CCTCTTG | TAC   | CCC      | -----    |
| Arja | AAACA | TCG | CCTCTTG | TAG   | AAC      | -----    |
| Pase | AAACA | CCG | CCTCTTG | C     | -AAA-A   | -----    |
| Trel | AAACA | TCG | CCTCTTG | CCC   | A        | -CC----- |
| Lifa | AAACA | TCG | CCTCCTG | C     | -AATAC   | -----    |
| Acur | AAACA | CCG | CCTCTTG | AAT   |          | -----    |
| Ampe | AAACA | TCG | CCTCTTG | CAAA  |          | -----    |
| Urja | AAACA | CCG | CCTCTTG | T     | --AA     | -----    |
| Enet | AAACA | TCG | CCTCTTG | CATT  | TCT      | -----    |
| Ptbr | AAACA | TCG | CCTCCTG | AA    | --T      | -----    |
| Safa | AAACA | TCG | CCTCCTG | GACT  | --T      | -----    |
| Icae | AAACA | TCG | CCTCTTG | CAAA  | AAG      | -----    |
| Asmi | AAACA | CCG | CCTCCTG | C     | --ACT    | -----    |
| Foal | AAACA | TCG | CCTCTTG | TACT  |          | -----    |
| Drze | AAACA | TCG | CCTCTTG | C     | -AAAT    | -----    |
| Rhas | AAACA | TCG | CCTCTTG | CAAC  | AA       | -----    |
| Elac | AAACA | TCG | CCTCTTG | AACC  | CT       | -----    |
| Kugu | AAACA | CCG | CCTCTTG | CCCC  | AAA      | -----    |
| Plor | AAACA | TCG | CCTCTTG | CT    | -AAA     | -----    |
| Sgun | AAACA | TCG | CCTCTTG | CAAAA |          | -----    |
| Zaco | AAACA | TCG | CCTCTTG | CAAAA |          | -----    |
| Zbfl | AAACA | TCG | CCTCTTG | CAAAA | A        | -----    |
| Spba | AAACA | TCG | CCTCTTG | A     |          | -----    |
| Game | AAACA | TCG | CCTCTTG | C     | --AAAA   | -----    |
| Thth | AAACA | TCG | CCTCTTG | CAAAA |          | -----    |
| Xigl | AAACA | TCG | CCTCTTG | CAAA  | -AC      | -----    |
| Hyja | AAACA | TCG | CCTCTTG | C     | -AAAAATA | -----    |
| Psan | AAACA | TCG | CCTCTTG | C     | -AAAA    | -----    |
| Cupa | AAACA | TCG | CCTCTTG | C     | -AAAA    | -----    |
| Mpch | AAACA | TCG | CCTCTTG | CAAAA | A        | -----    |
| Char | AAACA | TCG | CCTCTTG | T     | -AAT--TT | -----    |
| Pser | AAACA | TCG | CCTCTTG | CTAA  |          | -----    |
| Prol | AAACA | TCG | CCTCTTG | CAAG  | AC       | -----    |
| Plbi | AAACA | TCG | CCTCTTG | CATA  | A        | -----    |
| Calu | AAACA | TCG | CCTCTTG | CTAA  | ACTA     | -----    |
| Papa | AAACA | TCG | CCTCTTG | C     | -TTAT    | -----    |
| Sufr | AAACA | TCG | CCTCTTG | CGAA  |          | -----    |
| Stci | AAACA | TCG | CCTCTTG | A     | -AATC    | -----    |
| Taru | AAACA | TCG | CCTCTTG | CTT   | -CA      | -----    |
| Rala | AAACA | TCG | CCTCTTG | CAAA  | -A       | -----    |

\*\*\*\*\* \* \* \*

|      | HVR                 | 35' | 36      | 37   |     |      |         |
|------|---------------------|-----|---------|------|-----|------|---------|
| Scca | -----CC-----        | A   | TAAGAGG | TCCC | GCC | TGCC | CTGTGAC |
| Muma | -----TT-----        | A   | TAAGAGG | TCCC | GCC | TGCC | CTGTGAC |
| Erca | -----CACAT-----     | A   | TTGAAGG | TCCT | GCC | TGCC | CAGTGAC |
| Pose | -----CC--ATGT-----  | A   | TTGAAGG | TCCT | GCC | TGCC | CAGTGAC |
| Actr | -----CCA-ATGT-----  | A   | TTAGAGG | TCCC | GCC | TGCC | CTGTGAC |
| Scal | -----AAT---GT-----  | A   | TTAGAGG | TCCC | GCC | TGCC | CTGTGAC |
| Posp | -----T---GT-----    | A   | TTAGAGG | TCCC | GCC | TGCC | CTGTGAC |
| Atsp | -----AAGT-----      | A   | TTAGAGG | TCCC | GCC | TGCC | CTGTGAC |
| Leoc | -----CCN-AAGT-----  | A   | TTAGAGG | TCCC | GCC | TGCC | CTGTGAC |
| Amca | -----CC--AAGT-----  | A   | TTAGAGG | TCCC | GCC | TGCC | CAGTGAA |
| Osbi | -----AAAA-----      | A   | TAAGAGG | TCCA | ACC | TGCC | CAGTGAC |
| Pabu | -----CAA---AC-----  | A   | TAAGAGG | TCCA | GCC | TGCC | CAGTGAC |
| Hial | -----CCA-AAGT-----  | A   | TAAGAGG | TCCC | GCC | TGCC | CAGTGAC |
| Elha | -----CA-AAAT-----   | A   | TAAGAGG | TCCC | GCC | TGCC | CCGTGAC |
| Mlcy | -----TCA-AAGT-----  | A   | TAAGAGG | TCCC | GCC | TGCC | CCGTGAC |
| Algl | -----ACA-AAGT-----  | A   | TTAGAGG | TCCC | GCC | TGCC | CTGTGAA |
| Ptgi | -----AACGAAGT-----  | A   | TTAGAGG | TCCC | GCC | TGCC | CTGTGAC |
| Alaf | -----AG-AAGT-----   | A   | TTAGAGG | TCCC | GCC | TGCC | CAGTGAC |
| Nock | -----AAG-AAGT-----  | A   | TTAGAGG | TACC | GCC | TGCC | CAGTGAC |
| Anja | -----AGGAAG-----    | T   | CTAGAGG | TCCC | GCC | TGCC | CTGTGAC |
| Gyki | -----ATG-AAGT-----  | A   | TTAGAGG | TCCC | GCC | TGCC | CTGTGAC |
| Syka | -----ATG-AAGT-----  | A   | TTAGAGG | TCCC | GCC | TGCC | CTGTGAC |
| Opma | -----AGA-ATGT-----  | A   | TTAGAGG | TCCC | GCC | TGCC | CTGTGAC |
| Comy | -----GA--ATGT-----  | A   | TTGGAGG | TCCT | GCC | TGCC | CAGTGAC |
| Sasp | -----TAATGT-----    | A   | TAAGAGG | TCTT | GCC | TGCC | CAGTGAC |
| Eupe | -----A-AAGT-----    | A   | TAAGAGG | TCCC | GCC | TGCC | CAGTGAC |
| Enja | -----T-CCAAAGT----- | A   | TAAGAGG | TCCC | ACC | TGCC | CTGTGAC |
| Same | -----CA--ATT-----   | A   | TAGGAGG | TCCC | GCC | TGCC | CTGTGAC |
| Chch | -----TCG-ACGT-----  | A   | TAGAAGG | TCCT | GCC | TGCC | CAGTGAC |
| Grgr | -----TCG-ATGT-----  | A   | TAGGAGG | TCCC | GCC | TGCC | CAATGAC |
| Caau | -----ACC-AAGT-----  | A   | TAGGAGG | TCCA | GCC | TGCC | CAGTGAC |
| Cyca | -----CAACCAAGT----- | A   | TAGGAGG | TCCA | GCC | TGCC | CAGTGAC |
| Dare | -----C-C-CAAT-----  | A   | TAGGAGG | TCCA | GCC | TGCC | CAGTGAC |
| Cost | -----ATTCAAGGT----- | A   | TAGGAGG | TCCA | GCC | TGCC | CAGTGAC |
| Leec | -----CCA-ATGT-----  | A   | TAGGAGG | TCCA | GCC | TGCC | CCGTGAC |
| CrIa | -----ACG-AAGT-----  | A   | TAGGAGG | TCCA | GCC | TGCC | CAGTGAC |
| Clmc | -----CCA-ATAT-----  | A   | TGGGAGG | TCTT | ACC | TGCC | CAGTGAC |
| Phin | -----CAACGT-----    | A   | TAGGAGG | TCTT | ACC | TGCC | CAGTGAC |
| Icpu | -----TCA-ACGT-----  | A   | TAGGAGG | TCTT | GCC | TGCC | CAGTGAC |
| Psto | -----TCA-ACGT-----  | A   | TAGGAGG | TCTT | GCC | TGCC | CAGTGAC |
| Cora | -----CA-ATGT-----   | A   | TAGGAGG | TCCT | GCC | TGCC | CAGTGAC |
| Eisp | -----ATCA-ACAT----- | A   | TAGGAGG | TCCT | GCC | TGCC | CAGTGAA |
| Apal | -----C--AATAC-----  | A   | TAGGAGG | TCCC | GCC | TGCC | CTGTGAC |
| EsIu | -----CCC-AAAC-----  | A   | TAAGAGG | TCCC | GCC | TGCC | CTGTGAC |
| Dape | -----TAA-AC-----    | A   | TAAGAGG | TCCC | GCC | TGCC | CTGTGAC |
| Glse | -----AAGT-----      | A   | TAAGAGG | TCCC | GCC | TGCC | CTGTGAC |
| Naar | -----T-T-TAAT-----  | A   | TAAGAGG | TCCC | GCC | TGCC | CTGTGAC |
| Baoc | -----AAAC-----      | A   | TAAGAGG | TCCC | GCC | TGCC | CTGTGAC |
| Opso | -----AATTAAGT-----  | A   | TAAGAGG | TCCC | GCC | TGCC | CTGTGAC |
| Alte | -----A-AAC-----     | A   | TAGGAGG | TCCC | GCC | TGCC | CTGTGAC |
| Plap | -----CAA---AAC----- | A   | TAGGAGG | TCCC | GCC | TGCC | CTGTGAC |

|      |                                    |   |         |      |     |   |     |    |       |
|------|------------------------------------|---|---------|------|-----|---|-----|----|-------|
| Plal | -----CACGC-----                    | A | TAAGAGG | TCCC | GCC | T | GCC | CG | GTGAC |
| Sami | -----CT--ATGC-----                 | A | TAAGAAG | TCCC | GCC | T | GCC | CG | GTGAC |
| Rere | -----TTT-TAC-----                  | A | TAAGATG | TCCC | GCC | T | GCC | CG | GAGCC |
| Gama | -----TTAACCT-----                  | A | TAAGAGG | TCCT | GCC | T | GCC | CT | GTGAC |
| Onmy | -----C-AAA-----                    | A | CATAGAG | GTCC | GCC | T | GCC | CT | GTGAC |
| Sasa | -----AAAC-----                     | A | TAAGAGG | TCCC | GCC | T | GCC | CT | GTGAC |
| Cola | -----CA-AAGC-----                  | A | TAAGAGG | TCCC | GCC | T | GCC | CT | GTGAC |
| Dita | -----CC--ATGA-----                 | A | TAAGAGG | TCCC | GCC | T | GCC | CT | GTGAC |
| Gogr | -----T---AAC-----                  | A | TAAGAGG | TCCT | GCC | T | GCC | CT | GTGAC |
| Chsl | GGCCGCGGTATAATAACCGTGCTAAGGTACCTCA | A | TAAGAGG | TCCT | GCC | T | GCC | CA | GTGAC |
| Atja | -----A-----GA-----                 | A | TAAGAGG | TCCC | GCC | T | GCC | CT | GTGAC |
| Iido | -----C---AAGA-----                 | A | TAAGAGG | TCCC | GCC | T | GCC | CT | GTGAC |
| Auja | -----A-AAAA-----                   | A | TAAGAGG | TCCC | GCC | T | GCC | CT | GTGAC |
| Chag | -----AAAG-----                     | A | TAAGAGG | TCCC | GCC | T | GCC | CA | GTGAC |
| Hami | -----TCA-AAGA-----                 | A | TAAGAGG | TCCC | GCC | T | GCC | CT | GTGAC |
| Saun | -----AAAGA-----                    | A | TAAGAGG | TCCC | GCC | T | GCC | CT | GTGAC |
| Nema | -----CGAAGA-----                   | A | TAAGAGG | TCCC | GCC | T | GCC | CT | GTGAC |
| Disp | -----G-A-ACAA-----                 | A | TAAGAGG | TCCT | GCC | T | GCC | CA | GTGAC |
| Myaf | -----A-ACGA-----                   | A | TAAGAGG | TCCA | GCC | T | GCC | CA | GTGAC |
| Lagu | -----TTT-GAGA-----                 | A | TAAGAGG | TCCC | GCC | T | GCC | CG | GTGAC |
| Trtr | -----TTA-ATGA-----                 | A | TAAGAGG | CCAC | GCC | T | GCC | CG | GTGAC |
| Zucr | -----ATA-TTGT-----                 | A | TAAGAGG | CCAC | GCC | T | GCC | CG | GTGAC |
| Pxja | -----TAA-AA-----                   | A | TAAGAGG | TCCC | GCC | T | GCC | CT | GTGAC |
| Pxlo | -----TATTA AAA-----                | A | TAAGAGG | TCCC | GCC | T | GCC | CT | GTGAC |
| Pctr | -----C--CAAA-----                  | A | TGAGAGG | TCCC | GCC | T | GCC | CT | GTGAC |
| Apsa | -----AAGA-----                     | A | TAAGAGG | TCCC | GCC | T | GCC | CT | GTGAC |
| Cabe | -----ATGAA-----                    | A | TGGGAGG | TCCC | GCC | T | GCC | CG | GTGAC |
| Bzze | -----CTA-AAGA-----                 | A | TAAGAGG | TCCC | GCC | T | GCC | CT | GTGAC |
| Siim | -----CCA-AAGA-----                 | A | TAAGAGG | TCCG | ACC | T | GCC | CA | GTGAC |
| Ctru | -----A-AAGA-----                   | A | TAAGAGG | TCCC | GCC | T | GCC | CT | GTGAC |
| Dpbr | -----CTA-AAGA-----                 | A | TAAGAGG | TCCC | GCC | T | GCC | CT | GTGAC |
| Caki | -----A-CTAT-----                   | A | TAAGAGG | TCTC | GCC | T | GCC | CA | GTGAC |
| Phja | -----CAA-A-GT-----                 | A | TAAGAGG | TCCC | GCC | T | GCC | CT | GTGAC |
| Brsp | -----TATC-----                     | A | TGAGAGG | TCCT | GCC | T | GCC | CA | GTGAC |
| Gamo | -----AA-AAAT-----                  | A | TAAGAGG | TCCC | GCC | T | GCC | CT | GTGAC |
| Lolo | -----CCTAAAAAT-----                | A | TAAGAGG | TCCC | GCC | T | GCC | CT | GTGAC |
| Batr | -----AT-----                       | A | TAAGAAG | TCCT | GCC | T | GCC | CA | GTGAC |
| Prmy | -----CCTT-----                     | A | TAAGAAG | TCCC | GTC | T | GCC | CT | GTGAT |
| Loli | -----CAA-----                      | A | TAAGAGG | TCCT | GCC | T | GCC | CT | GTGAC |
| Loam | -----AAT---AA-----                 | A | TAAGAGG | TCCT | GCC | T | GCC | CT | GTGAC |
| Chab | -----ACGA-----                     | A | TAAGAGG | TCCC | GCC | T | GCC | CA | GTGAC |
| Chto | -----A-ACGA-----                   | A | TAAGAGG | TCCC | GCC | T | GCC | CA | GTGAC |
| Majo | -----CTA-A-GA-----                 | A | TAAGAGG | TCCC | GCC | T | GCC | CT | GTGAC |
| Hlst | -----T--AAAT-----                  | A | TAAGAGG | TCCC | GCC | T | GCC | CT | GTGAC |
| Clpe | -----C-----GA-----                 | A | TAAGAGG | TCCC | GCC | T | GCC | CT | GTGAC |
| Mlmr | -----T-A-ATGA-----                 | A | TAAGAGG | CCCC | GCC | T | GCC | CT | GTGAC |
| Crcr | -----CCAC-----                     | A | TAAGAGG | TCCT | GCC | T | GCC | CA | GTGAC |
| Muce | -----ACCTCAC-----                  | A | TAAGAGG | TCCT | GCC | T | GCC | CA | GTGAC |
| Bege | -----CCA-AAAA-----                 | A | TAAGAGG | TCCC | GCC | T | GCC | CT | GTGAC |
| Mela | -----AAAT-----                     | A | TAAGAGG | TCCC | GCC | T | GCC | CT | GTGAC |
| Hats | -----C--AAGA-----                  | A | TAAGAGG | TCTC | GCC | T | GCC | CT | GTGAC |
| Orla | -----A--T-GAA-----                 | A | TAAGAGG | TACC | GCC | T | GCC | CT | GTGAC |

|      |                      |         |      |     |      |         |
|------|----------------------|---------|------|-----|------|---------|
| Cosa | -----AA--ACGA-----A  | TAAGAGG | TCCC | GCC | TGCC | CTGTGAC |
| Exsp | -----AAGT-----A      | TAAGAGG | TCCC | GCC | TGCC | CTGTGAC |
| Depa | -----AAGT-----A      | TAAGAGG | TCCC | GCC | TGCC | CTGTGAC |
| Rima | -----AAC-----A       | TAAGAGG | TCCT | GCC | TGCC | CACTGAC |
| Fuol | -----CTAC-----A      | TAAGAGG | TCCT | GCC | TGCC | CTGTGAT |
| Gmaf | -----ACC-CCTA-----A  | TAAAAGG | TCCT | GCC | TGCC | CTGTGAA |
| Xeei | -----C----TAT-----A  | TAAGAGG | TCCT | GCC | TGCC | CCGTGAC |
| Pros | -----A-AAAA-----A    | TAAGAGG | TCCC | GCC | TGCC | CTGTGAC |
| Scmi | -----A-A-AT-----A    | TAAGAGG | TCCC | GCC | TGCC | CTGTGAC |
| Rolo | -----TTA-AC-----A    | TAAGAGG | TCCC | GCC | TGCC | CTGTGAC |
| Cere | -----TAA-AA-----A    | TAAGAGG | TCCC | ACC | TGCC | CTGTGAC |
| Daga | -----T--AAGA-----A   | TAAGAGG | TCCC | GCC | TGCC | CTGTGAC |
| Anco | -----ACAA-----A      | TAAGAGG | TCCC | GCC | TGCC | CTGTGAC |
| Dmve | -----TGT-----A       | TAAGAGG | TCCC | GCC | TGCC | CTGTGAC |
| Dmar | -----A--ACAT-----A   | TAAGAGG | TCCC | GCC | TGCC | CTGTGAC |
| Anka | -----T-A-ACAA-----A  | TAAGAGG | TCCC | GCC | TGCC | CTGTGAC |
| Moja | -----GCA-ACAA-----A  | TAAGAGG | TCCC | GCC | TGCC | CTGTGAC |
| Hoja | -----ACA-ACAA-----A  | TAAGAGG | TCCC | GCC | TGCC | CTGTGAC |
| Bede | -----AAGCAAAAA-----A | TAAGAGG | TCCC | GCC | TGCC | CTGTGAC |
| Besp | -----AA--A-AT-----A  | TAAGAGG | TCCC | GCC | TGCC | CTGTGAC |
| Mysp | -----CA--AAGA-----A  | TAAGAGG | TCCC | GCC | TGCC | CCGTGAC |
| Osja | -----AAACAAAGA-----A | TAAGAGG | TCCC | GCC | TGCC | CTGTGAC |
| Sgro | -----CA-AAGC-----A   | TAAGAGG | TCCC | GCC | TGCC | CTGTGAC |
| Pzpa | -----GTAT-----A      | TAAGAGG | TCCC | GCC | TGCC | CTGTGAC |
| Zeja | -----A-AAC-----A     | TAAGAGG | TCCC | GCC | TGCC | CTGTGAC |
| Znne | -----AAA-AAAC-----A  | TAAGAGG | TCCC | GCC | TGCC | CTGTGAC |
| Zefa | -----AA--AT-----A    | TAAGAGG | TCCC | GCC | TGCC | CTGTGAC |
| Acni | -----AAT-AAAT-----A  | TAAGAGG | TCCC | GCC | TGCC | CTGTGAC |
| Ncrh | -----ATA-A-AT-----A  | TAAGAGG | TCCC | GCC | TGCC | CTGTGAC |
| Agca | -----ATAA-----A      | TAAGAGG | TCCC | GCC | TGCC | CTGTGAC |
| Hydy | -----CTA-CTA-----A   | TAAGAGG | TCCC | GCC | TGCC | CTGTGAC |
| Gsac | -----A-ATAA-----A    | TAAGAGG | TCCC | GCC | TGCC | CTGTGAC |
| Pevo | -----ATC-GAAA-----A  | TAAGAGG | TCCA | GCC | TGCC | CTGTGAC |
| Hiku | -----ACA-ATGA-----A  | TAAGAGG | TCCC | GCC | TGCC | CTGTGAC |
| Inpa | -----CCC-GCCC-----A  | TAAGAGG | TCCC | GCC | TGCC | CCGTGAC |
| Auch | -----AATTGAAGA-----A | TAAGAGG | TCGA | GCC | TGCC | CACTGAC |
| Fico | -----CG--AAGA-----A  | TAAGAGG | TAAT | GCC | TGCC | CTGTGAC |
| Macs | -----TTA-AGGA-----A  | TAAGAGG | TCCC | GCC | TGCC | CTGTGAC |
| Moal | -----TAT-GTAT-----A  | TAGGAGG | CATT | GCC | TGCC | CACTGAC |
| Syma | -----CAAT-----A      | TAAGAGG | TCCC | ACC | TGCC | CCCTGAC |
| Mafr | -----T--GACAT-----A  | TAAGAGG | TCCC | GCC | TGCC | CCGTGAC |
| Dcpe | -----TTA-AAGA-----A  | TAAGAGG | TCCT | GCC | TGCC | CTGTGAC |
| Dcti | -----TAA-A-GA-----A  | TAAGAGG | TCCT | GCC | TGCC | CTGTGAC |
| Hehi | -----G-CTAAAGA-----A | TAAGAGG | TCCC | GCC | TGCC | CTGTGAC |
| Stam | -----AACAA-----A     | TAAGAGG | TCCC | GCC | TGCC | CTGTGAC |
| Hogi | -----CAC-CAAA-----A  | TAAGAGG | TCCC | GCC | TGCC | CTGTGAC |
| Erzo | -----TA-AGAA-----A   | TAAGAGG | TCCT | GCC | TGCC | CTGTGAC |
| Hxot | -----CA-AAAA-----A   | TAAGAGG | TCCC | GCC | TGCC | CTGTGAC |
| Core | -----TAA-AA-----A    | TAAGAGG | TCCC | GCC | TGCC | CTGTGAC |
| Apve | -----AAAA-----A      | TAAGAGG | TCCC | GCC | TGCC | CTGTGAC |
| Latj | -----CAC-ACAA-----A  | TAAGAGG | TCCC | GCC | TGCC | CACTGAC |
| Laja | -----T-ATGA-----A    | TAAGAGG | TCCC | GCC | TGCC | CCGTGAC |

|      |                      |         |      |     |      |    |       |
|------|----------------------|---------|------|-----|------|----|-------|
| Syja | -----T-A-ATGA-----A  | TAAGAGG | TCCC | GCC | TGCC | CA | GTGAC |
| Epme | -----CGA-AAGT-----A  | TAAGAGG | TCCC | GCC | TGCC | CT | GTGAC |
| Grse | -----CAAC-----A      | TAAGAGG | TCCC | GCC | TGCC | CT | GTGAC |
| Clja | -----TAA-T-GT-----A  | TAAGAGG | TCCC | GCC | TGCC | CG | GTGAC |
| Ogcy | -----C-AAAA-----A    | TAAGAGG | TACT | GCC | TGCC | CC | GTGAC |
| Plna | -----T---AAC-----A   | TAAGAGG | TCTC | GCC | TGCC | CA | GTGAC |
| Lema | -----ACC-AAGA-----A  | TAAGAGG | TCCC | GCC | TGCC | CT | GTGAC |
| Etzo | -----TTA-A-AA-----A  | TAAGAGG | TCCC | GCC | TGCC | CT | GTGAC |
| Apse | -----TCT-AAGA-----A  | TAAGAGG | TCCC | GCC | TGCC | CG | GTGAC |
| Epde | -----TAAAGA-----A    | TAAGAGG | TCCC | GCC | TGCC | CT | GTGAC |
| Slja | -----TCA-ATAA-----A  | TAAGAGG | TCCT | GCC | TGCC | CA | GTGAC |
| Bsja | -----TA--ACAA-----A  | TAAGAGG | TCCC | GCC | TGCC | CT | GTGAC |
| Ecna | -----CA--AAGA-----A  | TAAGAGG | TCCG | GCC | TGCC | CA | GTGAC |
| Cohi | -----AAGA-----A      | TAAGAGG | TCCC | ACC | TGCC | CG | GTGAC |
| Caar | -----CCA-AAGA-----A  | TAAGAGG | TCCC | GCC | TGCC | CA | GTGAC |
| Came | -----AAAGA-----A     | TAAGAGG | TCCC | GCC | TGCC | CG | GTGAC |
| Mema | -----CCA-AAGA-----A  | TAAGAGG | TCCC | GCC | TGCC | CA | GTGAC |
| Lenu | -----CCC-AGA-----A   | TAAGAGG | TCCC | ACC | TGCC | CA | GTGAC |
| Brja | -----T--AGAAT-----A  | TAAGAGG | TCCC | GCC | TGCC | CT | GTGAC |
| Plma | -----AAAAT-----A     | TAAGAGG | TCCA | GCC | TGCC | CT | GTGAC |
| Emst | -----CTA-ATGA-----A  | TAAGAGG | TCCC | GCC | TGCC | CT | GTGAC |
| Ptti | -----CA--ATGA-----A  | TAAGAGG | TCCC | GCC | TGCC | CT | GTGAC |
| Losu | -----C----AA-----A   | TAAGAGG | TCCC | ACC | TGCC | CA | GTGAC |
| Geoy | -----ACAACGA-----A   | TAAGAGG | TCCC | GCC | TGCC | CA | TTGAC |
| Dipi | -----CAATGA-----A    | TAAGAGG | TCCC | GCC | TGCC | CC | GTGAC |
| Pama | -----TCG-ATGA-----A  | TAAGAGG | TCCC | GCC | TGCC | CT | GTGAC |
| Leob | -----CA--ATGA-----A  | TAAGAGG | TCCC | GCC | TGCC | CT | GTGAC |
| Neba | -----TT-ACGA-----A   | TAAGAGG | TCCC | GCC | TGCC | CG | GTGAC |
| Pdpl | -----CAC-AAGA-----A  | TAAGAGG | TCCT | GCC | TGCC | CA | GTGAC |
| Nimi | -----ACGA-----A      | TAAGAGG | TCCA | GCC | TGCC | CA | ATGAC |
| Uptr | -----ACT-AAGA-----A  | TAAGAGG | TCCC | GCC | TGCC | CT | GTGAC |
| Pesc | -----GCA-ACAA-----A  | TAAGAGG | TCCT | GCC | TGCC | CC | GTGAC |
| Baar | -----ACGA-----A      | TAAGAGG | TCTC | ACC | TGCC | CA | CTGAC |
| Moar | -----TA-ATGA-----A   | TAAGAGG | TCCC | GCC | TGCC | CT | GTGAC |
| Toja | -----CT-AAAA-----A   | TAAGAGG | TCCT | GCC | TGCC | CA | ATGAC |
| Chau | -----TTA-ACGA-----A  | TAAGAGG | TCCC | GCC | TGCC | CT | GTGAC |
| Chse | -----TTA-ACAA-----A  | TAAGAGG | TCCC | GCC | TGCC | CT | GTGAC |
| Enar | -----T-A-ATAA-----A  | TAAGAGG | TCCC | GCC | TGCC | CT | GTGAC |
| Hpty | -----CTA-ATGA-----A  | TAAGAGG | TCCC | GCC | TGCC | CT | GTGAC |
| Nana | -----AAAAA-----A     | TAAGAGG | TCTT | GCC | TGCC | CT | GTGAC |
| Mcst | -----TTA-ATGA-----A  | TAAGAGG | TCCC | GCC | TGCC | CT | GTGAC |
| Rhox | -----CA--AAGA-----A  | TAAGAGG | TCCC | GCC | TGCC | CT | GTGAC |
| Opfa | -----CTG-AGGA-----A  | TAAGAGG | TCCC | GCC | TGCC | CT | GTGAC |
| Paar | -----AAACAAAAT-----A | TAAGAGG | TCCC | GCC | TGCC | CT | GTGAC |
| Gozo | -----CA-ACAT-----A   | TAAGAGG | TCCC | GCC | TGCC | CT | GTGAT |
| Ackr | -----C-A-ACGA-----A  | TAAGAGG | TCCC | GCC | TGCC | CT | GTGAC |
| Elev | -----CTAAAA-----A    | TAAGAGG | TCCC | GCC | TGCC | CA | GTGAC |
| Trdu | -----CCT-AAGT-----A  | TAAGAGG | TCCC | GCC | TGCC | CT | GTGAC |
| Amoc | -----AC-AGT-----A    | TAAGAGG | TCCC | GCC | TGCC | CA | GTGAC |
| Hame | -----CA--ACGA-----A  | TAAGAGG | TCCC | GCC | TGCC | CA | GTGAC |
| Chso | -----CA--ACAA-----A  | TAAGAGG | TCCC | GCC | TGCC | CT | GTGAC |
| Lyto | -----ACTTAATAA-----A | TAAGAGG | TCCC | GCC | TGCC | CT | GTGAC |



|      |                     |   |         |      |     |      |         |
|------|---------------------|---|---------|------|-----|------|---------|
| Encr | -----TA--ATAA-----  | A | TAAGAGG | TCCC | GCC | TGCC | CTGTGAC |
| Bvar | -----AA-TTAA-----   | A | TAAGAGG | TCCC | GCC | TGCC | CGGTGAC |
| Noco | -----ATA-ATGA-----  | A | TAAGAGG | TCCC | GCC | TGCC | CTGTGAC |
| Chsp | -----TAC-AAAT-----  | A | TAAGAGG | TCCT | GCC | TGCC | CGGTGAC |
| Arja | -----TC--AAAA-----  | A | TAAGAGG | TCCC | GCC | TGCC | CTGTGAC |
| Pase | -----TCA-ATGA-----  | A | TAAGAGG | TCAT | GCC | TGCC | CTGTGAC |
| Trel | -----CC----TG-----  | A | TAAGAGG | TCCA | GCC | TGCC | CTGTGAC |
| Lifa | -----CT--T-GT-----  | A | TAGGAGG | TCAT | GCC | TGCC | CGGTGAC |
| Acur | -----TT-GAA-----    | A | TAAGAGG | TCCA | GCC | TGCC | CAGTGAC |
| Ampe | -----GTA-ATGA-----  | A | TAAGAGG | TCCC | GCC | TGCC | CTGTGAC |
| Urja | -----CCA-ATAA-----  | A | TAAGAGG | TCCC | ACC | TGCC | CACTGAC |
| Enet | -----A--GT-----     | A | TAAGAGG | TCCC | GCC | TGCC | CTGTGAC |
| Ptbr | -----A--CTAATA----- | A | TAGGAGG | TCCC | GCC | TGCC | CGGTGAT |
| Safa | -----ACA--AAT-----  | A | TAGGAGG | TCCC | GCC | TGCC | CTGTGAT |
| Icae | -----C-A-AAGA-----  | A | TAAGAGG | TCCA | GCC | TGCC | CTGTGAC |
| Asmi | -----CAA-CAGT-----  | A | TAGGAGG | TCCT | GCC | TGCC | CAGTGAC |
| Foal | -----AAAA-----      | A | TAAGAGG | TCCC | GCC | TGCC | CAGTGAC |
| Drze | -----T-T-AAGA-----  | A | TAAGAGG | TCAC | GCC | TGCC | CGGTGAC |
| Rhas | -----CAC-A-AT-----  | A | TAAGAGG | TCCC | GCC | TGCC | CTGTGAC |
| Elac | -----CAA-TACT-----  | A | TAAGAGG | TCCC | GCC | TGCC | CTGTGAC |
| Kugu | -----AAGA-----      | A | TAAGAGG | TCCC | GCC | TGCC | CTGTGAC |
| Plor | -----CCC-ACAA-----  | A | TAAGAGG | TCCC | GCC | TGCC | CTGTGAC |
| Sgun | -----TTAATGA-----   | A | TAAGAGG | TCCC | GCC | TGCC | CTGTGAC |
| Zaco | -----GC-A-ACGT----- | A | TAAGAGG | TCCC | GCC | TGCC | CTGTGAC |
| Zbfl | -----C-A-ACGA-----  | A | TAAGAGG | TCCC | GCC | TGCC | CTGTGAC |
| Spba | -----AAACCCAGT----- | A | TAAGAGG | TCTC | GCC | TGCC | CAGTGAC |
| Game | -----ATA-ACGA-----  | A | TAAGAGG | TCCA | GCC | TGCC | CTGTGAC |
| Thth | -----ACAA-AGA-----  | A | TAAGAGG | TCCA | GCC | TGCC | CTGTGAC |
| Xigl | -----CAAAGA-----    | A | TAAGAGG | TCCC | GCC | TGCC | CAGTGAC |
| Hyja | -----AAGA-----      | A | TAAGAGG | TCCA | GCC | TGCC | CTGTGAC |
| Psan | -----ACA-AAGA-----  | A | TAAGAGG | TCTA | GCC | TGCC | CTGTGAC |
| Cupa | -----CGT-AAGA-----  | A | TAAGAGG | TCCA | GCC | TGCC | CTGTGAC |
| Mpch | -----CTA-AGA-----   | A | TAAGAGG | TCCC | GCC | TGCC | CTGTGAC |
| Char | -----AAAA-----      | A | TAAGAGG | TCCC | GCC | TGCC | CAGTGAC |
| Pser | -----CC--AAAA-----  | A | TAAGAGG | TCCA | ACC | TGCC | CAGTGAC |
| Prol | -----A-C-AAGT-----  | A | TAAGAGG | TCCC | GCC | TGCC | CAGTGAC |
| Plbi | -----CCA-CAGT-----  | A | TAAGAGG | TCCC | GCC | TGCC | CAGTGAC |
| Calu | -----CTTGTAGA-----  | A | TAAGAGG | TCTA | GCC | TGCC | CAGTGAC |
| Papa | -----G--AT-----     | A | TAAGAGG | TCCT | GCC | TGCC | CAATGAC |
| Sufr | -----TCA-AAGA-----  | A | TAGGAGG | TCCA | GCC | TGCC | CTGTGAC |
| Stci | -----C--CCAC-----   | A | TAAGAGG | TCCC | GCC | TGCC | CTGTGAC |
| Taru | -----ATGA-----      | A | TAAGAGG | TCAC | GCC | TGCC | CTGTGAC |
| Rala | -----CTA-ATGA-----  | A | TAAGAGG | TCCC | GCC | TGCC | CTGTGAC |

\*                    \* \* \* \* \*

|      |              | 37'     | 38  | 38'    | 39            |            |
|------|--------------|---------|-----|--------|---------------|------------|
| Scca | --AAT-----   | GTTCAAC | GGC | CGCGGT | ATT-TTGACCGTC | CAAAAGGTAG |
| Muma | AAT-----     | GTTCAAC | GGC | CGCGGT | ATT-TTGACCGTC | CAAAAGGTAG |
| Erca | TAAA-----    | GTTTAAC | GGC | CGCGGT | ATC-TTGACCGTC | CAAAAGGTAG |
| Pose | --ATGA-----  | GTTTAAC | GGC | CGCGGT | ATC-CTGACCGTC | CAAAAGGTAG |
| Actr | CAAAA-----   | GTTTAAC | GGC | CGCGGT | ATT-TTGACCGTC | CGAAAGGTAG |
| Scal | --CAAAA----- | GTTTAAC | GGC | CGCGGT | ATT-TTGACCGTC | CGAAAGGTAG |
| Posp | CAA-AA-----  | GTTTAAC | GGC | CGCGGT | ATT-TTGACCGTC | CGAAAGGTAG |
| Atsp | T---TA-----  | GTTTAAC | GGC | CGCGGT | ATT-TTGACCGTC | CGAAAGGTAG |
| Leoc | T-----T-A    | GTTTAAC | GGC | CGCGGT | ATT-TTGACCGTC | CGAAAGGTAG |
| Amca | --AAAT-----  | TTTCAAC | GGC | CGCGGT | ATT-TTGACCGTC | CGAAAGGTAG |
| Osbi | TTCAAAA----- | GTTAAAC | GGC | CGCGGT | ATT-TTAACCGTC | CTAAAGGTAG |
| Pabu | ATATA-----   | GTTAAAC | GGC | CGCAGT | ATT-TTAACCGCC | CTAAAGGTAG |
| Hial | --TCTGA----- | GTTAAAT | GGC | CGCGGT | ATT-TTAACCGTC | CAAAAGGTAG |
| Elha | CCAAAA-----  | GTTTAAC | GGC | CGCGGT | ATT-TTGACCGTC | CGAAAGGTAG |
| Mlcy | -TAACAA----- | GTTCAAC | GGC | CGCGGT | ATT-CTGACCGTC | CGAAAGGTAG |
| Algl | GTAAAA-----  | ATTTAAC | GGC | CGCGGT | ATT-CTGACCGTC | CAAAAGGTAG |
| Ptgi | CAAGA-----   | GTTTAAC | GGC | CGCGGT | ATT-CTGACCGTC | CGAAAGGTAG |
| Alaf | A-TATAA----- | GTTAAAC | GGC | CGCGGT | ATT-CTGACCGTC | CTAAAGGTAG |
| Nock | A-AAAA-----  | GTTAAAC | GGC | CGCGGT | ATT-CTGACCGTC | CTAAAGGTAG |
| Anja | CACAAA-----  | GTTTAAC | GGC | CGCGGT | ATC-CTGACCGTC | CGAAAGGTAG |
| Gyki | -AGCAGT----- | GTTTAAC | GGC | CGCGGT | ATT-CTAACCGCC | CGAAAGGTAG |
| Syka | CAAAGT-----  | GTTTAAC | GGC | CGCGGT | ATC-CTGACCGTC | CGAAAGGTAG |
| Opma | C-AATGT----- | GTTTAAC | GGC | CGCGGT | ATC-ATAACCGTC | CGAAAGGTAG |
| Comy | AA-TAG-----  | GTTCAAC | GGC | CGCGGT | ATT-TTGACCGTC | CAAAAGGTAG |
| Sasp | CCGA-----    | TTTCAAC | GGC | CGCGGT | ATT-ATGACCGTC | CAAAAGGTAG |
| Eupe | C--CG-----   | TTTCAAC | GGC | CGCGGT | ATT-ATGACCGTC | CTAAAGGTAG |
| Enja | TCTAA-----   | GTTTAAC | GGC | CGCGGT | ATT-CTAACCGTC | CGAAAGGTAG |
| Same | CAA-----     | TTTCAAC | GGC | CGCGGT | ATT-TTAACCGTC | CGAAAGGTAG |
| Chch | TATA-G-----  | GTTCAAC | GGC | CGCGGT | ATT-TTGACCGTC | CAAAAGGTAG |
| Grgr | TAT-----     | GTTCAAT | GGC | CGCGGT | ATT-TTGACCGTC | CTAAAGGTAG |
| Caau | T-ACAA-----  | GTTCAAC | GGC | CGCGGT | ATT-TTGACCGTC | CAAAAGGTAG |
| Cyca | TACAA-----   | GTTCAAC | GGC | CGCGGT | ATT-TTGACCGTC | CAAAAGGTAG |
| Dare | -A--ATA----- | GTTTAAC | GGC | CGCGGT | ATT-TTGACCGTC | CAAAAGGTAG |
| Cost | CACAA-----   | GTTCAAC | GGC | CGCGGT | ATT-TTGACCGTC | CAAAAGGTAG |
| Leec | T-ACAA-----  | GTTTAAC | GGC | CGCGGT | ATT-TTGACCGTC | CAAAAGGTAG |
| CrIa | C-TACAA----- | GTTCAAC | GGC | CGCTGT | ATT-TTGACCGTC | CAAAAGGTAG |
| Clmc | A-ACTA-----  | GTTAAAC | GGC | CGCGGT | ATT-TTGACCGTC | CTAAAGGTAG |
| Phin | ATTCGT-----  | GTTAAAC | GGC | CGCGGT | ATT-TTGACCGTC | CTAAAGGTAG |
| Icpu | -----AT----- | GTTAAAC | GGC | CGCGGT | ATT-TTGACCGTC | CGAAAGGTAG |
| Psto | ---AA-----   | GTTAAAC | GGC | CGCGGT | ATT-TTGACCGTC | CGAAAGGTAG |
| Cora | T--AT-----   | GTTGAAC | GGC | CGCGGT | ATT-TTGACCGTC | CAAAAGGTAG |
| Eisp | ---A-----    | TTTCAAC | GGC | CGCGGT | ATT-TTGACCGTC | CAAAAGGTAG |
| Apal | TCT-GT-----  | GTTTAAC | GGC | CGCGGT | ATT-TTGACCGTC | CAAAAGGTAG |
| EsLu | --TATAC----- | GTTTAAC | GGC | CGCGGT | ATT-TTAACCGTC | CGAAAGGTAG |
| Dape | TATGG-----   | GTTTAAC | GGC | CGCGGT | ATT-TTAACCGTC | CGAAAGGTAG |
| Glse | C---TTG----- | GTTTAAC | GGC | CGCGGT | ATT-CTGACCGTC | CGAAAGGTAG |
| Naar | --TCTAA----- | GTTTAAC | GGC | CGCGGT | ATT-TTGACCGTC | CGAAAGGTAG |
| Baoc | T--ATAA----- | GTTTAAC | GGC | CGCGGT | ATT-TTGACCGTC | CGAAAGGTAG |
| Opso | CCTGG-----   | GTTTAAC | GGC | CGCGGT | ATC-TTGACCGTC | CGAAAGGTAG |
| Alte | --TCTAA----- | GTTTAAC | GGC | CGCGGT | ATT-TTGACCGTC | CGAAAGGTAG |
| Plap | TTTAA-----   | GTTTAAC | GGC | CGCGGT | ATT-TTGACCGTC | CGAAAGGTAG |

|      |              |                |            |               |         |               |              |      |
|------|--------------|----------------|------------|---------------|---------|---------------|--------------|------|
| Plal | CCTGG-----   | <b>GTTAAAC</b> | <b>GGC</b> | <b>CGCGGT</b> | ATT-TTA | <b>ACCGTC</b> | <b>CGAAC</b> | GTAG |
| Sami | CCCTGG-----  | <b>GTTAAAC</b> | <b>GGC</b> | <b>CGCGGT</b> | ATT-TTG | <b>ACCGTC</b> | <b>CGAAC</b> | GTAG |
| Rere | -T-CTGG----- | <b>GTTAAAC</b> | <b>GGC</b> | <b>CGCGGT</b> | ATT-TTA | <b>ACCGTC</b> | <b>CGAAC</b> | GTAG |
| Gama | TATGA-----   | <b>GTTAAAC</b> | <b>GGC</b> | <b>CGCGGT</b> | ATT-TTG | <b>ACCGTC</b> | <b>CAAAC</b> | GTAG |
| Onmy | TATGG-----   | <b>GTTAAAC</b> | <b>GGC</b> | <b>CGCGGT</b> | ATT-TTG | <b>ACCGTC</b> | <b>CGAAC</b> | GTAG |
| Sasa | T---ATG----- | <b>GTTAAAC</b> | <b>GGC</b> | <b>CGCGGT</b> | ATT-TTG | <b>ACCGTC</b> | <b>CGAAC</b> | GTAG |
| Cola | T--ATGG----- | <b>GTTAAAC</b> | <b>GGC</b> | <b>CGCGGT</b> | ATT-TTG | <b>ACCGTC</b> | <b>CGAAC</b> | GTAG |
| Dita | C-ACAA-----  | <b>GTTAAAC</b> | <b>GGC</b> | <b>CGCGGT</b> | ATA-TTG | <b>ACCGTC</b> | <b>CAAAC</b> | GTAG |
| Gogr | CAC--GT----- | <b>GTTAAAC</b> | <b>GGC</b> | <b>CGCGGT</b> | ATT-TTA | <b>ACCGTC</b> | <b>CAAAC</b> | GTAG |
| Chsl | AATT-----    | <b>GTTAAAC</b> | <b>GGC</b> | <b>CGCGGT</b> | ATA-ATA | <b>ACCGTC</b> | <b>CTAAC</b> | GTAG |
| Atja | --AATT-----  | <b>GTTAAAC</b> | <b>GGC</b> | <b>CGCGGT</b> | ATT-TTG | <b>ACCGTC</b> | <b>CAAAC</b> | GTAG |
| Iido | AATTA-----   | <b>GTTAAAC</b> | <b>GGC</b> | <b>CGCGGT</b> | ATT-TTG | <b>ACCGTC</b> | <b>CAAAC</b> | GTAG |
| Auja | --CTAAG----- | <b>GTTAAAC</b> | <b>GGC</b> | <b>CGCGGT</b> | ATT-TTG | <b>ACCGTC</b> | <b>CGAAC</b> | GTAG |
| Chag | TTGTAT-----  | <b>GTTAAAC</b> | <b>GGC</b> | <b>CGCGGT</b> | ATT-TTG | <b>ACCGTC</b> | <b>CGAAC</b> | GTAG |
| Hami | TCGAG-----   | <b>GTTAAAC</b> | <b>GGC</b> | <b>CGCGGT</b> | ATC-TTG | <b>ACCGTC</b> | <b>CGAAC</b> | GTAG |
| Saun | TTAAGA-----  | <b>GTTAAAC</b> | <b>GGC</b> | <b>CGCGGT</b> | ATC-TTG | <b>ACCGTC</b> | <b>CGAAC</b> | GTAG |
| Nema | TATAT-----   | <b>GTTAAAC</b> | <b>GGC</b> | <b>CGCGGT</b> | ATT-TTG | <b>ACCGTC</b> | <b>CGAAC</b> | GTAG |
| Disp | --TATAT----- | <b>GTTAAAC</b> | <b>GGC</b> | <b>CGCGGT</b> | ATT-CTG | <b>ACCGTC</b> | <b>CGAAC</b> | GTAG |
| Myaf | T--ATAC----- | <b>GTTAAAC</b> | <b>GGC</b> | <b>CGCGGT</b> | ATC-TTG | <b>ACCGTC</b> | <b>CAAAC</b> | GTAG |
| Lagu | AAT--A-----  | <b>GTTAAAC</b> | <b>GGC</b> | <b>CGCGGT</b> | ATT-CTG | <b>ACCGTC</b> | <b>CGAAC</b> | GTAG |
| Trtr | C-----AAAA   | <b>GTTAAAC</b> | <b>GGC</b> | <b>CGCGGT</b> | ATT-ATG | <b>ACCGTC</b> | <b>CAAAC</b> | GTAG |
| Zucr | -TAGAA-----  | <b>GTTAAAC</b> | <b>GGC</b> | <b>CGCGGT</b> | ATT-ATG | <b>ACCGTC</b> | <b>CAAAC</b> | GTAG |
| Pxja | T-----CTAT   | <b>GTTAAAC</b> | <b>GGC</b> | <b>CGCGGT</b> | ATT-TTG | <b>ACCGTC</b> | <b>CGAAC</b> | GTAG |
| Pxlo | TCTAT-----   | <b>GTTAAAC</b> | <b>GGC</b> | <b>CGCGGT</b> | ATT-TTG | <b>ACCGTC</b> | <b>CGAAC</b> | GTAG |
| Pctr | AA--AT-----  | <b>GTTAAAC</b> | <b>GGC</b> | <b>CGCGGT</b> | ATT-TTG | <b>ACCGTC</b> | <b>CGAAC</b> | GTAG |
| Apsa | AT-CTA-----  | <b>GTTAAAC</b> | <b>GGC</b> | <b>CGCGGT</b> | ATT-TTG | <b>ACCGTC</b> | <b>CGAAC</b> | GTAG |
| Cabe | -----TATAC   | <b>GTTAAAC</b> | <b>GGC</b> | <b>CGCGGT</b> | ATT-TTA | <b>ACCGTC</b> | <b>CAAAC</b> | GTAG |
| Bzze | TA-----TAA   | <b>GTTAAAC</b> | <b>GGC</b> | <b>CGCGGT</b> | ATT-TTG | <b>ACCGTC</b> | <b>CGAAC</b> | GTAG |
| Siim | T-----ATAT   | <b>GTTAAAC</b> | <b>GGC</b> | <b>CGCGGT</b> | ATT-CTG | <b>ACCGTC</b> | <b>CGAAC</b> | GTAG |
| Ctru | --AATAC----- | <b>GTTAAAC</b> | <b>GGC</b> | <b>CGCGGT</b> | ATT-TTG | <b>ACCGTC</b> | <b>CGAAC</b> | GTAG |
| Dpbr | AATAT-----   | <b>GTTAAAC</b> | <b>GGC</b> | <b>CGCGGT</b> | ATT-TTG | <b>ACCGTC</b> | <b>CGAAC</b> | GTAG |
| Caki | --TAAAT----- | <b>GTTAAAC</b> | <b>GGC</b> | <b>CGTGGT</b> | ATC-TTA | <b>ACCATC</b> | <b>CGAAC</b> | GTAG |
| Phja | -GA--AA----- | <b>GTTAAAC</b> | <b>GGC</b> | <b>CGCGGT</b> | ATT-CTA | <b>ACCGTC</b> | <b>CGAAC</b> | GTAG |
| Brsp | TATAT-----   | <b>GTTAAAC</b> | <b>GGC</b> | <b>CGTGGT</b> | ATC-TTA | <b>ACCATC</b> | <b>CTAAC</b> | GTAG |
| Gamo | T--ATAA----- | <b>GTTAAAC</b> | <b>GGC</b> | <b>CGCGGT</b> | ATT-TTG | <b>ACCGTC</b> | <b>CGAAC</b> | GTAG |
| Lolo | TATAA-----   | <b>GTTAAAC</b> | <b>GGC</b> | <b>CGCGGT</b> | ATT-TTA | <b>ACCGTC</b> | <b>CGAAC</b> | GTAG |
| Batr | --CCA-----   | <b>GTTCAAC</b> | <b>GGC</b> | <b>TGCAGT</b> | ATC-ATG | <b>ACTGTA</b> | <b>CTAAC</b> | GTAG |
| Prmy | -ATA-----    | <b>ATTAAAC</b> | <b>GGC</b> | <b>TGCAGT</b> | AAC-ACA | <b>ACTGCA</b> | <b>CAAAC</b> | GTAG |
| Loli | -ACATA-----  | <b>GTTAAAC</b> | <b>GGC</b> | <b>CGCGGT</b> | ATT-TTA | <b>ACCGTC</b> | <b>CGAAC</b> | GTAG |
| Loam | AATTA-----   | <b>GTTCAAC</b> | <b>GGC</b> | <b>CGCGGT</b> | ATT-TTG | <b>ACCGTC</b> | <b>CGAAC</b> | GTAG |
| Chab | -T-ACAA----- | <b>GTTCAAC</b> | <b>GGC</b> | <b>CGCGGT</b> | ATT-TTG | <b>ACCGTC</b> | <b>CGAAC</b> | GTAG |
| Chto | TAC--AA----- | <b>GTTCAAC</b> | <b>GGC</b> | <b>CGCGGT</b> | ATT-TTG | <b>ACCGTC</b> | <b>CGAAC</b> | GTAG |
| Majo | TCTAAGA----- | <b>GTTAAAC</b> | <b>GGC</b> | <b>TGCGGT</b> | ATT-TTG | <b>ACCGTC</b> | <b>CAAAC</b> | GTAG |
| Hlst | TGTTTAA----- | <b>GTTAAAC</b> | <b>GGC</b> | <b>CGCGGT</b> | ATT-TTG | <b>ACCGTC</b> | <b>CAAAC</b> | GTAG |
| Clpe | TAT-TA-----  | <b>GTTAAAC</b> | <b>GGC</b> | <b>CGCGGT</b> | ATT-TTG | <b>ACCGTC</b> | <b>CGAAC</b> | GTAG |
| Mlmr | TAATTTA----- | <b>GTTAAAC</b> | <b>GGC</b> | <b>CGCGGT</b> | ATC-ATG | <b>ACCGTC</b> | <b>CAAAC</b> | GTAG |
| Crcr | C---CC-----  | <b>GTTCAAC</b> | <b>GGC</b> | <b>CGCGGT</b> | ATT-TTA | <b>ACCGCC</b> | <b>CAAAC</b> | GTAG |
| Muce | CCCT-----    | <b>GTTCAAC</b> | <b>GGC</b> | <b>CGCGGT</b> | ATT-TTA | <b>ACCGCC</b> | <b>CAAAC</b> | GTAG |
| Bege | TATAT-----   | <b>GTTAAAC</b> | <b>GGC</b> | <b>CGCGGT</b> | ATT-TTG | <b>ACCGTC</b> | <b>CAAAC</b> | GTAG |
| Mela | T---ATA----- | <b>GTTAAAC</b> | <b>GGC</b> | <b>CGCGGT</b> | ATC-TTG | <b>ACCGTC</b> | <b>CGAAC</b> | GTAG |
| Hats | T-----ATAA   | <b>GTTAAAC</b> | <b>GGC</b> | <b>CGCGGT</b> | ATT-TTA | <b>ACCGTC</b> | <b>CGAAC</b> | GTAG |
| Orla | --TAAAA----- | <b>GTTAAAC</b> | <b>GGC</b> | <b>CGCGGT</b> | ATT-TTG | <b>ACCGTC</b> | <b>CAAAC</b> | GTAG |

|      |                       |          |      |         |         |        |    |     |      |
|------|-----------------------|----------|------|---------|---------|--------|----|-----|------|
| Cosa | TC-TA-----            | GTTTAAC  | -GGC | -CGCGGT | ATT-TTG | ACCGTC | CA | AAG | GTAG |
| Exsp | A-AAAA-----           | GTTTAAC  | -GGC | -CGCGGT | ATC-TTG | ACCGTC | CG | AAG | GTAG |
| Depa | -ACCA-----            | GTTTAAC  | -GGC | -CGCGGT | ATT-TTA | ACCGTC | CA | AAG | GTAG |
| Rima | -ACA-AT-----          | GTTC AAC | -GGC | -CGCGGT | ATT-TTG | ACCGTC | TG | AAG | GTAG |
| Fuol | ---AAT-----           | ATTTAAC  | -GGC | -CGCGGT | ATC-TTG | ACCGTC | CA | AAG | GTAG |
| Gmaf | TTAA-A-----           | TTTTAAC  | -GGC | -CGCGGT | ATC-TTG | ACCGTC | CA | AAG | GTAG |
| Xeei | TTTATA-----           | GTTTAAC  | -GGC | -CGCGGT | ATC-TTG | ACCGTC | CA | AAG | GTAG |
| Pros | TAT--GT-----          | GTTTAAC  | -GGC | -CGCGGT | ATT-TTG | ACCGTC | CA | AAG | GTAG |
| Scmi | T-ATAT-----           | GTTTAAC  | -GGC | -CGCGGT | ATT-TTG | ACCGTC | CA | AAG | GTAG |
| Rolo | --TATAT-----          | GTTTAAC  | -GGC | -CGCGGT | ATT-TTG | ACCGTC | CG | AAG | GTAG |
| Cere | ATATGTTTAACTGTGACATAT | GTTTAAC  | -GGC | -CGCGGT | ATT-TTG | ACCGTC | CA | AAG | GTAG |
| Daga | ---ATCT-----          | GTTTAAC  | -GGC | -CGCGGT | ATT-CTG | ACCGTC | CA | AAG | GTAG |
| Anco | T---ATA-----          | GTTTAAC  | -GGC | -CGCGGT | ATT-TTG | ACCGTC | CG | AAG | GTAG |
| Dmve | TA-ATT-----           | GTTTAAC  | -GGC | -CGCGGT | ATT-TTG | ACCGTC | CA | AAG | GTAG |
| Dmar | AATT-----             | GTTC AAC | -GGC | -CGCGGT | ATT-TTG | ACCGTC | CG | AAG | GTAG |
| Anka | T-ATAA-----           | GTTTAAC  | -GGC | -CGCGGT | ATT-TTG | ACCGTC | CG | AAG | GTAG |
| Moja | TATA-T-----           | GTTTAAC  | -GGC | -CGCGGT | ATT-TTG | ACCGTC | CG | AAG | GTAG |
| Hoja | TATAT-----            | GTTTAAC  | -GGC | -CGCGGT | ATT-TTG | ACCGTC | CG | AAG | GTAG |
| Bede | TATAT-----            | GTTTAAC  | -GGC | -CGCGGT | ATT-TTG | ACCGTC | CG | AAG | GTAG |
| Besp | TA-TAT-----           | GTTTAAC  | -GGC | -CGCGGT | ATT-TTG | ACCGTC | CG | AAG | GTAG |
| Mysp | T-ATAT-----           | GTTTAAC  | -GGC | -CGCGGT | ATT-TTG | ACCGTC | CA | AAG | GTAG |
| Osja | TATAT-----            | GTTTAAC  | -GGC | -CGCGGT | ATT-TTG | ACCGTC | CA | AAG | GTAG |
| Sgro | -T-ATAT-----          | GTTTAAC  | -GGC | -CGCGGT | ATT-TTG | ACCGTC | CA | AAG | GTAG |
| Pzpa | T-TTAA-----           | GTTTAAC  | -GGC | -CGCGGT | ATC-TTG | ACCGTC | CG | AAG | GTAG |
| Zeja | --TTTTAA-----         | GTTTAAC  | -GGC | -CGCGGT | ATT-TTG | ACCGTC | CG | AAG | GTAG |
| Zzne | -TTAAA-----           | GTTTAAC  | -GGC | -CGCGGT | ATT-TTG | ACCGTC | CG | AAG | GTAG |
| Zefa | TT-AAA-----           | GTTTAAC  | -GGC | -CGCGGT | ATT-TTG | ACCGTC | CA | AAG | GTAG |
| Acni | T-TTAA-----           | GTTTAAC  | -GGC | -CGCGGT | ATT-TTG | ACCGTC | CG | AAG | GTAG |
| Ncrh | TTTTAA-----           | GTTTAAC  | -GGC | -CGCGGT | ATT-TTG | ACCGTC | CG | AAG | GTAG |
| Agca | --TAAAT-----          | GTTTAAC  | -GGC | -CGCGGT | ATT-TTA | ACCGTC | CA | AAG | GTAG |
| Hydy | T-ATA-----            | GTTTAAC  | -GGC | -CGCGGT | ATT-TTG | ACCGTC | CG | AAG | GTAG |
| Gsac | --TATAA-----          | GTTTAAC  | -GGC | -CGCGGT | ATT-TTG | ACCGTC | CG | AAG | GTAG |
| Pevo | CAAA-AT-----          | GTTTAAC  | -GGC | -CGCGGT | ATT-TTG | ACCGTC | CG | AAG | GTAG |
| Hiku | CATG-A-----           | GTTTAAC  | -GGC | -CGCGGT | ATT-TTG | ACCGTC | CA | AAG | GTAG |
| Inpa | --AAT-----            | ATTTAAC  | -GGC | -CGCGGT | ATT-CTA | ACCGTC | CA | AAG | GTAG |
| Auch | TATAT-----            | GTTC AAC | -GGC | -CACGGT | ATT-TTG | ACCGTC | CA | AAG | GTAG |
| Fico | CC-TAG-----           | GTTTAAC  | -GGC | -CGCGGT | ATT-TTG | ACCGTC | CG | AAG | GTAG |
| MacS | TATAA-----            | GTTTAAC  | -GGC | -CGCGGT | ATT-TTG | ACCGTC | CG | AAG | GTAG |
| Moal | ---ACAT-----          | GTTTAAC  | -GGC | -CGCGGT | ATC-CTA | ACCGTC | CA | AAG | GTAG |
| Syma | T---ATA-----          | GTTC AAC | -GGC | -CACGGT | ATC-CTA | ACCGTC | CA | AAG | GTAG |
| Mafr | ACCCAA-----           | GTTC AAC | -GGC | -CGCGGT | ATC-CTG | ACCGTC | CA | AAG | GTAG |
| Dcpe | TAT--AA-----          | GTTTAAC  | -GGC | -CGCGGT | ATA-ATG | ACCGTC | CG | AAG | GTAG |
| Dcti | --TATAA-----          | GTTTAAC  | -GGC | -CGCGGT | ATT-ATG | ACCGTC | CG | AAG | GTAG |
| Hehi | TATTA-----            | GTTTAAC  | -GGC | -CGCGGT | ATT-TTG | ACCGTC | CA | AAG | GTAG |
| Stam | T-ATAA-----           | GTTTAAC  | -GGC | -CGCGGT | ATT-TTG | ACCGTC | CG | AAG | GTAG |
| Hogi | T-ATTA-----           | GTTTAAC  | -GGC | -CGCGGT | ATT-TTG | ACCGTC | CG | AAG | GTAG |
| Erzo | C--ATGA-----          | GTTTAAC  | -GGC | -CGCGGT | ATT-TTG | ACCGTC | CG | AAG | GTAG |
| Hxot | T--ATTT-----          | GTTTAAC  | -GGC | -CGCGGT | ATT-TTG | ACCGTC | CG | AAG | GTAG |
| Core | TAT--TT-----          | GTTTAAC  | -GGC | -CGCGGT | ATT-TTG | ACCGTC | CG | AAG | GTAG |
| Apve | TATTAT-----           | GTTTAAC  | -GGC | -CGCGGT | ATT-TTG | ACCGTC | CA | AAG | GTAG |
| Latj | AACTG-----            | GTTC AAC | -GGC | -CGCGGT | ATT-TTG | ACCGTC | CG | AAG | GTAG |
| Laja | --TATAA-----          | GTTC AAC | -GGC | -CGCGGT | ATT-TTG | ACCGTC | CG | AAG | GTAG |

|      |              |             |      |         |         |        |    |     |      |
|------|--------------|-------------|------|---------|---------|--------|----|-----|------|
| Syja | T-ATAT-----  | GTTCAAC     | -GGC | -CGCGGT | ATT-TTA | ACCGTC | CA | AAG | GTAG |
| Epme | TATAT-----   | GTTTAAC     | -GGC | -CGCGGT | ATT-TTG | ACCGTC | CG | AAG | GTAG |
| Grse | T---ATA----- | AGTTTAAC    | -GGC | -CGCGGT | ATT-CTG | ACCGTC | CG | AAG | GTAG |
| Clja | TAT--AT----- | GTTTAAC     | -GGC | -CGCGGA | ACC-CTG | ACCGTC | CG | AAG | GTAG |
| Ogcy | -CCT-GA----- | GTTTAAC     | -GGC | -CGCGGT | ATT-TTG | ACCGTC | CA | AAG | GTAG |
| Plna | TCATGA-----  | GTTCAAC     | -GGC | -CGCGGT | ATT-TTA | ACCGTC | CA | AAG | GTAG |
| Lema | -T-ATAA----- | GTTTAAC     | -GGC | -CGCGGT | ATT-TTG | ACCGTC | CA | AAG | GTAG |
| Etzo | TAT--AT----- | GTTTAAC     | -GGC | -CGCGGT | ATT-TTG | ACCGTC | CG | AAG | GTAG |
| Apse | --TAT-T----- | GTTTAAC     | -GGC | -CGCGGT | ACT-CTG | ACCGTC | CG | AAG | GTAG |
| Epde | TATA-A-----  | GTTTAAC     | -GGC | -CGCGGT | ATT-TTG | ACCGTC | CG | AAG | GTAG |
| Slja | CCTAGT-----  | GTTCAAC     | -GGC | -CGCGGT | ATCACTA | ACCGCC | CG | AAG | GTAG |
| Bsja | TC-TAT-----  | GTTTAAC     | -GGC | -CGCGGT | ATA-CTG | ACCGTC | CG | AAG | GTAG |
| Ecna | AATTA-----   | GTTTAAC     | -GGC | -CGCGGT | ATT-TTG | ACCGTC | CT | AAG | GTAG |
| Cohi | A---CC-----  | AGTTTAAC    | -GGC | -CGCGGT | ATC-CTG | ACCGTC | CG | AAG | GTAG |
| Caar | AATATG-----  | GTTCAAC     | -GGC | -CGCGGT | ATT-TTG | ACCGTC | CA | AAG | GTAG |
| Came | T-ATAT-----  | GTTTAAC     | -GGC | -CGCGGT | ATT-TTG | ACCGTC | CG | AAG | GTAG |
| Mema | TGA-----     | TTGAGTTTAAC | -GGC | -CGCGGT | ATT-CTG | ACCGTC | CA | AAG | GTAG |
| Lenu | TATAA-----   | GTTTAAC     | -GGC | -CGCGGT | ATT-TTG | ACCGTC | CA | AAG | GTAG |
| Brja | TAT-AT-----  | GTTTAAC     | -GGC | -CGCGGT | ATT-TTA | ACCGTC | CG | AAG | GTAG |
| Plma | T-ATAT-----  | GTTTAAC     | -GGC | -CGCGGT | ATT-TTA | ACCGTC | CG | AAG | GTAG |
| Emst | TATAA-----   | GTTTAAC     | -GGC | -CGCGGT | ATT-TTG | ACCGTC | CG | AAG | GTAG |
| Ptti | T-GAAA-----  | GTTTAAC     | -GGC | -CGCGGT | ATT-TTG | ACCGTC | CG | AAG | GTAG |
| Losu | TAT-AT-----  | GTTCAAC     | -GGC | -CGCAGT | ATT-TTA | ACCGCC | CG | AAG | GTAG |
| Geoy | TATAA-----   | GTTTAAC     | -GGC | -CGCGGT | ATT-TTG | ACCGTC | CA | AAG | GTAG |
| Dipi | CAAAG-----   | GTTTAAC     | -GGC | -CGCGGT | ATT-TTG | ACCGTC | CA | AAG | GTAG |
| Pama | T-----       | ATAGTTTAAC  | -GGC | -CGCGGT | ATT-TTG | ACCGTC | CG | AAG | GTAG |
| Leob | TA-TAT-----  | GTTTAAC     | -GGC | -CGCGGT | ATT-TTG | ACCGTC | CG | AAG | GTAG |
| Neba | T--ATAT----- | GTTAAAC     | -GGC | -CGCGGT | ATA-CTG | ACCGTC | CC | AAG | GTAG |
| Pdpl | AACCCAA----- | GTTCAAC     | -GGC | -CGCGGT | ATT-CTG | ACCGTC | CG | AAG | GTAG |
| Nimi | C---ATG----- | TGTTTAAC    | -GGC | -CGCGGT | ATT-TTG | ACCGTC | CA | AAG | GTAG |
| Uptr | TGTA-A-----  | GTTTAAC     | -GGC | -CGCGGT | ACT-CTG | ACCGTC | CG | AAG | GTAG |
| Pesc | -TATAT-----  | GTTCAAC     | -GGC | -CGCGGT | ATT-TTG | ACCGTC | CA | AAG | GTAG |
| Baar | T---ACA----- | TGTTTAAC    | -GGC | -CGCGGT | ATT-CTA | ACCGTC | CG | AAG | GTAG |
| Moar | TA-TAA-----  | GTTTAAC     | -GGC | -CGCGGT | ATT-TTG | ACCGTC | CG | AAG | GTAG |
| Toja | -ACACT-----  | GTTCAAC     | -GGC | -CGCGGT | ATT-TTG | ACCGTC | CG | AAG | GTAG |
| Chau | -TATA-----   | TGTTTAAC    | -GGC | -CGCGGT | ATT-TTG | ACCGTC | CG | AAG | GTAG |
| Chse | T-ATAC-----  | GTTTAAC     | -GGC | -CGCGGT | ATT-TTG | ACCGTC | CA | AAG | GTAG |
| Enar | T-ATTA-----  | GTTTAAC     | -GGC | -CGCGGT | ATT-TTG | ACCGTC | CG | AAG | GTAG |
| Hpty | -TATAA-----  | GTTTAAC     | -GGC | -CGCGGT | ATT-TTG | ACCGTC | CG | AAG | GTAG |
| Nana | ATAAACT----- | GTTTAAC     | -GGC | -CGCGGT | ATC-CTG | ACCGTC | CA | AAG | GTAG |
| Mcst | TATAT-----   | GTTTAAC     | -GGC | -CGCGGT | ATT-CTG | ACCGTC | CG | AAG | GTAG |
| Rhox | TATA-T-----  | GTTTAAC     | -GGC | -CGCGGT | ATT-TTG | ACCGTC | CG | AAG | GTAG |
| Opfa | T-----       | ATAGTTTAAC  | -GGC | -CGCGGT | ATT-TTG | ACCGTC | CA | AAG | GTAG |
| Paar | TATAC-----   | GTTTAAC     | -GGC | -CGCGGT | ATC-CTG | ACCGTC | CA | AAG | GTAG |
| Gozo | -AATA-----   | AGTTTAAC    | -GGC | -CGCGGT | ATT-TTG | ACCGTC | CG | AAG | GTAG |
| Ackr | TAT--AT----- | GTTTAAC     | -GGC | -CGCGGT | ATT-TTG | ACCGTC | CA | AAG | GTAG |
| Elev | GATGA-----   | GTTCAAC     | -GGC | -CGCGGT | ATT-CTG | ACCGTC | CA | AAG | GTAG |
| Trdu | --TATAA----- | GTTTAAC     | -GGC | -CGCGGT | ATT-TTG | ACCGTC | CA | AAG | GTAG |
| Amoc | AACATT-----  | GTTTAAC     | -GGC | -CGCGGT | ACT-TTG | ACCGTC | CG | AAG | GTAG |
| Hame | TA-TAT-----  | GTTTAAC     | -GGC | -CGCGGT | ATT-TTG | ACCGTC | CA | AAG | GTAG |
| Chso | TA-TAT-----  | GTTTAAC     | -GGC | -CGCGGT | ATT-TTG | ACCGTC | CG | AAG | GTAG |
| Lyto | TATTA-----   | GTTTAAC     | -GGC | -CGCGGT | ATT-TTG | ACCGTC | CG | AAG | GTAG |

|      |              |           |             |            |               |         |               |           |            |      |
|------|--------------|-----------|-------------|------------|---------------|---------|---------------|-----------|------------|------|
| Encr | T-ATTA-----  | <b>GT</b> | <b>TTA</b>  | <b>AC</b>  | <b>CGCGGT</b> | ATT-TTG | <b>ACCGTC</b> | <b>CG</b> | <b>AAG</b> | GTAG |
| Bvar | --TATAT----- | <b>GT</b> | <b>CAAC</b> | <b>GGC</b> | <b>CGCGGT</b> | ATT-TTA | <b>ACTGCC</b> | <b>CG</b> | <b>AAG</b> | GTAG |
| Noco | -TATTA-----  | <b>GT</b> | <b>TTA</b>  | <b>AC</b>  | <b>CGCGGT</b> | ATT-TTG | <b>ACCGCC</b> | <b>CG</b> | <b>AAG</b> | GTAG |
| Chsp | CAC--GA----- | <b>GT</b> | <b>TTA</b>  | <b>AC</b>  | <b>CGCGGT</b> | ATT-TTG | <b>ACCGTC</b> | <b>CA</b> | <b>AAG</b> | GTAG |
| Arja | T-ATTT-----  | <b>GT</b> | <b>TTA</b>  | <b>AC</b>  | <b>CGCGGT</b> | ATT-TTG | <b>ACCGTC</b> | <b>CG</b> | <b>AAG</b> | GTAG |
| Pase | -----GAAAT   | <b>GT</b> | <b>TTA</b>  | <b>AC</b>  | <b>CGCGGT</b> | ATC-TTA | <b>ACCGTC</b> | <b>CA</b> | <b>AAG</b> | GTAG |
| Trel | CAAA-A-----  | <b>GT</b> | <b>CAAC</b> | <b>GGC</b> | <b>CGCGGT</b> | ATA-CTG | <b>ACCGTC</b> | <b>CG</b> | <b>AAG</b> | GTAG |
| Lifa | TTTAGT-----  | <b>GT</b> | <b>TTA</b>  | <b>AC</b>  | <b>CGCGGT</b> | ATC-TTG | <b>ACCGTC</b> | <b>CG</b> | <b>AAG</b> | GTAG |
| Acur | TACTAA-----  | <b>GT</b> | <b>TTA</b>  | <b>AC</b>  | <b>CGCGGT</b> | ATT-CTA | <b>ACCGTC</b> | <b>CG</b> | <b>AAG</b> | GTAG |
| Ampe | -TCTAA-----  | <b>GT</b> | <b>TTA</b>  | <b>AC</b>  | <b>CGCGGT</b> | ATT-TTG | <b>ACCGTC</b> | <b>CG</b> | <b>AAG</b> | GTAG |
| Urja | T-ATAT-----  | <b>GT</b> | <b>TTA</b>  | <b>AC</b>  | <b>CGCGGT</b> | ATT-TTA | <b>ACCGTC</b> | <b>CA</b> | <b>AAG</b> | GTAG |
| Enet | --AC-AC----- | <b>GT</b> | <b>TTA</b>  | <b>AC</b>  | <b>CGCGGT</b> | ATT-CTG | <b>ACCGTC</b> | <b>CA</b> | <b>AAG</b> | GTAG |
| Ptbr | TTTTA-----   | <b>AT</b> | <b>TTA</b>  | <b>AC</b>  | <b>CGCGGT</b> | ATC-CTA | <b>ACCGTC</b> | <b>CA</b> | <b>AAG</b> | GTAG |
| Safa | CTAGA-----   | <b>AT</b> | <b>TTA</b>  | <b>AC</b>  | <b>CGCGGT</b> | ATT-TTG | <b>ACCGTC</b> | <b>CA</b> | <b>AAG</b> | GTAG |
| Icae | --TATAT----- | <b>GT</b> | <b>TTA</b>  | <b>AC</b>  | <b>CGCGGT</b> | ATT-CTA | <b>ACCGTC</b> | <b>CG</b> | <b>AAG</b> | GTAG |
| Asmi | -A-T--A----- | <b>GT</b> | <b>TTA</b>  | <b>AC</b>  | <b>CGCGGT</b> | ATT-TTG | <b>ACCGTC</b> | <b>CG</b> | <b>AAG</b> | GTAG |
| Foal | -TTTAT-----  | <b>GT</b> | <b>TTA</b>  | <b>AC</b>  | <b>CGCGGT</b> | ATT-TTA | <b>ACCGTC</b> | <b>CA</b> | <b>AAG</b> | GTAG |
| Drze | -ATACAA----- | <b>GT</b> | <b>TTA</b>  | <b>AC</b>  | <b>CGCGGT</b> | ATC-CTA | <b>ACCGTC</b> | <b>CA</b> | <b>AAG</b> | GTAG |
| Rhas | -GT--AA----- | <b>GT</b> | <b>TTA</b>  | <b>AC</b>  | <b>CGCGGT</b> | ATT-TTG | <b>ACCGTC</b> | <b>CG</b> | <b>AAG</b> | GTAG |
| Elac | CAAAG-----   | <b>GT</b> | <b>TTA</b>  | <b>AC</b>  | <b>CGCGGT</b> | ATC-CTG | <b>ACCGTC</b> | <b>CG</b> | <b>AAG</b> | GTAG |
| Kugu | TTACGA-----  | <b>GT</b> | <b>TTA</b>  | <b>AC</b>  | <b>CGCGGT</b> | ATT-TTG | <b>ACCGTC</b> | <b>CA</b> | <b>AAG</b> | GTAG |
| Plor | -T-ATAA----- | <b>GT</b> | <b>TTA</b>  | <b>AC</b>  | <b>CGCGGT</b> | ATT-TTA | <b>ACCGTC</b> | <b>CA</b> | <b>AAG</b> | GTAG |
| Sgun | TATAT-----   | <b>GT</b> | <b>TTA</b>  | <b>AC</b>  | <b>CGCGGT</b> | ATT-TTG | <b>ACCGTC</b> | <b>CG</b> | <b>AAG</b> | GTAG |
| Zaco | TATAA-----   | <b>GT</b> | <b>CAAC</b> | <b>GGC</b> | <b>CGCGGT</b> | ATT-TTG | <b>ACCGTC</b> | <b>CG</b> | <b>AAG</b> | GTAG |
| Zbfl | --TTAAA----- | <b>GT</b> | <b>TTA</b>  | <b>AC</b>  | <b>CGCGGT</b> | ATT-TTG | <b>ACCGTC</b> | <b>CG</b> | <b>AAG</b> | GTAG |
| Spba | TATAT-----   | <b>GT</b> | <b>CAAC</b> | <b>GGC</b> | <b>CGCGGT</b> | ATT-TTG | <b>ACCGTC</b> | <b>CA</b> | <b>AAG</b> | GTAG |
| Game | TATAT-----   | <b>GT</b> | <b>TTA</b>  | <b>AC</b>  | <b>CGCGGT</b> | ATT-TTA | <b>ACCGTC</b> | <b>CG</b> | <b>AAG</b> | GTAG |
| Thth | TATAT-----   | <b>GT</b> | <b>TTA</b>  | <b>AC</b>  | <b>CGCGGT</b> | ATT-TTA | <b>ACCGTC</b> | <b>CA</b> | <b>AAG</b> | GTAG |
| Xigl | AATCTA-----  | <b>GT</b> | <b>CAAC</b> | <b>GGC</b> | <b>CGCGGT</b> | ATT-TTG | <b>ACCGTC</b> | <b>CA</b> | <b>AAG</b> | GTAG |
| Hyja | T---ATA----- | <b>GT</b> | <b>CAAC</b> | <b>GGC</b> | <b>CGCGGT</b> | ATT-TTA | <b>ACCGTC</b> | <b>CG</b> | <b>AAG</b> | GTAG |
| Psan | TATAT-----   | <b>GT</b> | <b>TTA</b>  | <b>AC</b>  | <b>CGCGGT</b> | ATT-TTA | <b>ACCGTC</b> | <b>CG</b> | <b>AAG</b> | GTAG |
| Cupa | TAT--AT----- | <b>GT</b> | <b>TTA</b>  | <b>AC</b>  | <b>CGCGGT</b> | ATT-TTA | <b>ACCGTC</b> | <b>CG</b> | <b>AAG</b> | GTAG |
| Mpch | A-AAAA-----  | <b>GT</b> | <b>TTA</b>  | <b>AC</b>  | <b>CGCGGT</b> | ATT-TTG | <b>ACCGTC</b> | <b>CA</b> | <b>AAG</b> | GTAG |
| Char | A---CTA----- | <b>GT</b> | <b>CAAC</b> | <b>GGC</b> | <b>CGCGGT</b> | ATT-TTG | <b>ACCGTC</b> | <b>CA</b> | <b>AAG</b> | GTAG |
| Pser | C-ATGT-----  | <b>GT</b> | <b>TTA</b>  | <b>AC</b>  | <b>CGCAGT</b> | ATT-TTG | <b>ACTGTC</b> | <b>CG</b> | <b>AAG</b> | GTAG |
| Prol | -ATCATA----- | <b>GT</b> | <b>CAAC</b> | <b>GGC</b> | <b>CGCGGT</b> | ATT-TTG | <b>ACCGTC</b> | <b>CA</b> | <b>AAG</b> | GTAG |
| Plbi | AACT-TA----- | <b>GT</b> | <b>CAAC</b> | <b>GGC</b> | <b>CGCGGT</b> | ATT-TTG | <b>ACCGTC</b> | <b>CA</b> | <b>AAG</b> | GTAG |
| Calu | AAT-AT-----  | <b>GT</b> | <b>CAAC</b> | <b>GGC</b> | <b>CGCAGT</b> | ATT-TTG | <b>ACTGTC</b> | <b>CT</b> | <b>AAG</b> | GTAG |
| Papa | ATACAT-----  | <b>GT</b> | <b>CAAT</b> | <b>GGC</b> | <b>CGCGGT</b> | ATA-TTA | <b>ACCGTC</b> | <b>CG</b> | <b>AAG</b> | GTAG |
| Sufr | TTTTAC-----  | <b>GT</b> | <b>TTA</b>  | <b>AC</b>  | <b>CGCGGT</b> | ATT-TTG | <b>ACCGTC</b> | <b>CG</b> | <b>AAG</b> | GTAG |
| Stci | TCTGG-----   | <b>GT</b> | <b>TTA</b>  | <b>AC</b>  | <b>CGCGGT</b> | ATC-TTA | <b>ACCGTC</b> | <b>CG</b> | <b>AAG</b> | GTAG |
| Taru | T---ATA----- | <b>GT</b> | <b>TTA</b>  | <b>AC</b>  | <b>CGCGGT</b> | ATT-TTG | <b>ACCGTC</b> | <b>CA</b> | <b>AAG</b> | GTAG |
| Rala | TATAA-----   | <b>GT</b> | <b>TTA</b>  | <b>AC</b>  | <b>CGCGGT</b> | ATT-TTG | <b>ACCGTC</b> | <b>CG</b> | <b>AAG</b> | GTAG |

\* \* \* \* \*      \* \*      \* \*      \* \* \* \* \*

|       | 39'      | 40  | 40'     | 36'   | 33'    |            |     |      |     |        |       |
|-------|----------|-----|---------|-------|--------|------------|-----|------|-----|--------|-------|
| Scca  | CGTAATCA | CTT | -GTCTTT | TAAAT | GAAGAC | CCGTATGAAA | GGC | ACCA | CGA | GAGTTT | GACTG |
| Muma  | CGTAATCA | TTT | -GTCTTT | TAAAT | GAAGAC | CCGTATGAAA | GGC | ACCA | CGA | GAGTTT | AACTG |
| Erca  | CGTAATCA | CTT | -GTCCTT | TAAAT | AGGGAC | TGGTATGAAT | GGC | CAAA | CGA | GGGCTC | GACTG |
| Pose  | CGTAATCA | CTT | -GTCCTT | TAAAT | GAGGAC | TGGTATGAAT | GGC | CCCA | CGA | GGGCTC | AACTG |
| Actr  | CGTAATCA | CTT | -GTCTTT | TAAAT | GAAGAC | CTGTATGAAT | GGC | ATAA | CGA | GGGCTC | AACTG |
| Scal  | CGTAATCA | CTT | -GTCTTT | TAAAT | GAAGAC | CTGTATGAAT | GGC | ATTA | CGA | GGGCTC | AACTG |
| Posp  | CGTAATCA | CTT | -GTCTTT | TAAAT | GAAGAC | CTGTATGAAT | GGC | ATAA | CGA | GGGCTC | GACTG |
| Atsp  | CGTAATCA | CTT | -GTCTTT | TAAAT | GAAGAC | CCGTATGAAT | GGC | ATCA | CGA | AGGCTC | ACCTG |
| Leoc  | CGTAATCA | CTT | -GTCTTT | TAAAT | GAAGAC | CCGTATGAAT | GGC | ATCA | CGA | GGGCTC | ACCTG |
| Amca  | CGTAATCA | CTT | -GTCTTT | TAAAT | AAAGAC | CTGTATGAAT | GGC | ATCA | CGA | GGGCTC | ATCTG |
| Osbi  | CGTAATCA | CTT | -GTCTTT | TAAAT | GAAGAC | CCGTATGAAA | GGT | ACCA | CGA | AGACCT | TACTG |
| Pabu  | CGTAATCA | CTT | -GTCTTT | TAAAT | GAAGAC | CCGTATGAAA | GGC | ACCA | CGA | GGGCCC | TACTG |
| Hial  | CGTAATCA | CTT | -GTCTTT | TAAAT | GAAGAC | CCGTATGAAT | GGC | ATCA | CGA | GGGCCC | AGCTG |
| Elha  | CGTAATCA | CTT | -GTCTTT | TAAAT | GAAGAC | CCGTATGAAT | GGC | AACA | CGA | GGGCTC | AGCTG |
| Mlcy  | CGTAATCA | CCT | -GTCTTT | TAAAT | GAAGAC | CTGTATGAAA | GGC | ACCA | CGA | GGGCTC | AACTG |
| Algl  | CGTAATCA | TTT | -GTCTTT | TAAAT | AAAGAC | CTGTATGAAT | GGC | ATCA | CGA | GGGCTC | GACTG |
| Ptgi  | CGTAATCA | CTT | -GTCTTT | TAAAT | GGAGAC | CTGTATGAAT | GGC | ACCA | CGA | GGGCTC | GACTG |
| Alaf  | CGTAATCA | CTT | -GTCTTT | TAAAT | GAAGAC | CCGTATGAAC | GGC | ATCA | CGA | GGGCTC | AACTG |
| Nock  | CGTAATCA | CTT | -GTCTTT | TAAAT | GAAGAC | CCGTATGAAT | GGC | ATCA | CGA | GGGCTC | AGCTG |
| Anja  | CGTAATCA | TTT | -GTCTTT | TAAAT | AGAGAC | CTGTATGAAT | GGC | ATAA | CGA | GGGTTT | AACTG |
| Gyki  | CGTAATCA | CTT | -GTCTTT | TAAAT | GGAGAC | CTGTATGAAT | GGC | ATAA | CGA | GGACTT | AACTG |
| Syka  | CGTAATCA | TTT | -GTCTTT | TAAAT | GAAGAC | CAGTATGAAT | GGC | ATCA | CGA | GGGTTT | AACTG |
| Opma  | CGTAATCA | CTT | -GTCTTT | TAAAT | GGAGAC | CTGTATGAAT | GGC | ACCA | CGA | GGGTTT | AACTG |
| Comy  | CGTAATCA | CCT | -GTCTTT | TAAAT | AAAGAC | CTGTATGAAT | GGC | AAGA | CGA | GGGTTT | TACTG |
| Sasp  | CGTAATCA | CTT | -GTCTTT | TAAAT | AAAGAC | CTGTATGAAT | GGC | TTAA | CGA | GGGGCT | TACTG |
| Eupe  | CACAATCA | CTT | -GTCTTT | TAAAT | AAAGAC | CTGTATGAAT | GGC | ACAA | CGA | GGGATT | AACTG |
| Enja  | CGCAATCA | ATT | -GCCTTT | TAAAT | GAAGGC | CTGTATGAAT | GGT | ATAA | CGA | GGGTCT | AGCTG |
| Same  | CGCAATCA | ATT | -GTCTTT | TAAAT | GGAGAC | CTGTATGAAT | GGC | ATAA | CGA | GGGTTT | AACTG |
| Chch  | CGCAATCA | CTT | -GTCTCT | TAAAT | AGAGAC | CTGTATGAAT | GGC | ACGA | CGA | GGGCTT | AACTG |
| Grgr  | CGCAATCA | CTT | -GTCTCT | TAAAT | GGAGAC | CTGTATGAAG | GGC | GCCA | CGA | GGGCTT | GACTG |
| Caau  | CGCAATCA | CTT | -GTCTTT | TAAAT | AGAGAC | CTGTATGAAT | GGC | TAAA | CGA | GGGCTT | AACTG |
| Cyca  | CGCAATCA | CTT | -GTCTTT | TAAAT | AGAGAC | CTGTATGAAT | GGC | TAAA | CGA | GGGCTT | AACTG |
| Dare  | CGCAATCA | CTC | -GTCCTT | TAAAT | AGGGAC | CTGTATGAAT | GGC | CAAA | CGA | GGGCTT | AACTG |
| Cost  | CGCAATCA | CTT | -GTCTTT | TAAAT | GAAGAC | CTGTATGAAT | GGC | TAAA | CGA | GGGCTT | AGCTG |
| Leec  | CGCAATCA | CTT | -GTCTTT | TAAAT | GAAGAC | CCGTATGAAT | GGC | CAAA | CGA | GGGCTT | AACTG |
| Cr la | CGCAATCA | CTT | -GTCTTT | TAAAT | AAAGAC | CTGTATGAAT | GGC | CAAA | CGA | GGGCTT | AACTG |
| Clmc  | CGCAATCA | CTT | -GTCTTT | TAAAT | GAAGAC | CTGTATGAAT | GGT | GGAA | CGA | GGGCTT | AACTG |
| Phin  | CGCAATCA | CTT | -GTTTTT | TAAAT | GAAGAC | CTGTATGAAT | GGT | GGAA | CGA | GGGCTT | AACTG |
| Icpu  | CGCAATCA | CTT | -GTCTCT | TAAAT | GGAGAC | CTGTATGAAT | GGT | GGAA | CGA | GGGCTT | AACTG |
| Psto  | CGCAATCA | CTT | -GTCTTT | TAAAT | GAAGAC | CTGTATGAAT | GGT | GGAA | CGA | GGGCTT | AACTG |
| Cora  | CGCAATCA | CTT | -GTCTTT | TAAAT | GAAGAC | CTGTATGAAT | GGT | GGAA | CGA | GGGCCT | AACTG |
| Eisp  | CGTAATCA | CTT | -GTCTTT | TAAAT | AAAGAC | CTGTATGAAT | GGC | AAAA | CGA | GGGCTT | AACTG |
| Apal  | CGCAATCA | CTT | -GTTTCA | TAAAT | TGAAAC | CCGTATGAAT | GGC | AAGA | CGA | AGGCTT | AACTG |
| Es lu | CGCAATCA | CTT | -GTCTTT | TAAAT | GAAGAC | CTGTATGAAT | GGC | ATCA | CGA | GGGCTT | AGCTG |
| Dape  | CGCAATCA | CTT | -GTCTTT | TAAAT | GAAGAC | CTGTATGAAT | GGC | ATCA | CGA | GGGCTT | AGCTG |
| Glse  | CGCAATCA | CTT | -GTCTTT | TAAAT | GAAGAC | CTGTATGAAT | GGC | ACGA | CGA | GGGCTT | AGCTG |
| Naar  | CGTAATCA | CTT | -GTCTTT | TAAAT | GAAGAC | CCGTATGAAT | GGC | ACAA | CGA | GGGCTT | GACTG |
| Baoc  | CGTAATCA | CTT | -GTCTTT | TAAAT | GAAGAC | CCGTATGAAT | GGC | ACGA | CGA | GGGCTT | AACTG |
| Opso  | CGCAATCA | CTT | -GTCTTT | TAAAT | GAAGAC | CTGTATGAAT | GGC | ATAA | CGA | GGGCTT | AACTG |
| Al te | CGCAATCA | CTT | -GTCTTT | TAAAT | GAGGAC | CTGTATGAAT | GGC | ATCA | CGA | GGGCTT | AGCTG |
| Plap  | CGCAATCA | CTT | -GTCTTT | TAAAT | GAGGAC | CTGTATGAAT | GGC | ATCA | CGA | GGGCTT | AGCTG |

Plal CGCAATCA**CTT** - **GTCCTT**TAAAT**GAAGAC**CTGTATGAAT**GGC**TAGA**CGAGGGCTT**AACTG  
 Sami CGCAATCA**CTT** - **GTCCTT**TAAAT**GAGGAC**CTGTATGAAT**GGC**TAGA**CGAGGGCTT**AGCTG  
 Rere CGCAATCA**CTT** - **GTCCTT**TAAAT**GAAGAC**CTGTATGAAT**GGC**TAGA**CGAGGGCTT**GACTG  
 Gama CGCAATCA**CTT** - **GTCTTT**TAAAT**GAAGAC**CCGTATGAAT**GGC**AAGA**CGAGGGCTA**AGCTG  
 Onmy CGCAATCA**CTT** - **GTCTTT**TAAAT**GAAGAC**CTGTATGAAT**GGC**ATCA**CGAGGGCTT**AGCTG  
 Sasa CGCAATCA**CTT** - **GTCTTT**TAAAT**GAAGAC**CTGTATGAAT**GGC**ATCA**CGAGGGCTT**AGCTG  
 Cola CGCAATCA**CTT** - **GTCTTT**TAAAT**GAAGAC**CTGTATGAAT**GGC**ATCA**CGAGGGCTT**AGCTG  
 Dita CGCAATCA**CTT** - **GTCTTT**TAAAT**GAAGAC**CCGTATGAAA**GGC**ACGA**CGAGGGCTT**AACTG  
 Gogr CGCAATCA**CTT** - **GTCTTT**TAAAT**AAAGAC**CCGTATGAAT**GGC**ATAA**CGAAGGCTC**AACTG  
 Chsl CGCAATCA**CTT** - **GTCTCC**TAATT**AGAGAC**CCGTATGAAC**GGC**AAGA**CGAGGGCTT**AACTG  
 Atja CGCAATCA**CTT** - **GTCTTT**TAAAT**GAAGAC**CTGTATGAAC**GGC**ATTA**CGAGGGCTT**AGCTG  
 lido CGCAATCA**CTT** - **GTCTTT**TAAAT**GAAGAC**CTGTATGAAT**GGC**ATTA**CGAGGGCTT**AGCTG  
 Auja CGCAATCA**CTT** - **GTCTTT**TAAAT**GAGGAC**CTGTATGAAT**GGC**ACAA**CGAAGGCTT**AACTG  
 Chag CGCAATCA**CTT** - **GTCCTT**TAAAT**GGGGAC**CTGTATGAAT**GGC**ACGA**CGAGGGCTT**AGCTG  
 Hami CGCAATCA**CTT** - **GTCCTT**TAAAT**GAGGAC**CCGTATGAAT**GGC**ATAA**CGAGGGCTC**AACTG  
 Saun CGCAATCA**CTT** - **GTCCTT**TAAAT**GAGGAC**CCGTATGAAT**GGC**ATAA**CGAGGGCTC**AACTG  
 Nema CGCAATCA**CTT** - **GTCTTT**TAAAT**GGAGAC**CTGTATGAAA**GGC**ACCA**CGAGGGCTT**AACTG  
 Disp CGCAATCA**CTT** - **GTCTCT**TAAAT**GGAGAC**CTGTATGAAA**GGC**ACGA**CGAGGGCTT**AGCTG  
 Myaf CGCAATAA**ATT** - **GTCTCT**TAATT**AGGGAC**TAGTATGAAT**GGC**ATCA**CGAGGGCTT**AACTG  
 Lagu CGCAATCA**CTT** - **GTCTTT**TAAAT**GAAGAC**CTGTATGAAT**GGC**ACCA**CGAGGACTT**AGCTG  
 Trtr CGTAATCA**CTT** - **GTCTTT**TAAAT**GGAGAC**CTGTATGAAT**GGC**GAGA**CGAGGGCGA**AACTG  
 Zucr CGTAATCA**CTT** - **GTCTTT**TAAAT**GGAGAC**CTGTATGAAA**GGC**GAGA**CGAGGGCAA**AACTG  
 Pxja CGCAATCA**CTT** - **GTCTTT**TAAAT**GAAGAC**CCGTATGAAT**GGC**ATAA**CGAGGGCTT**AACTG  
 Pxlo CGCAATCA**CTT** - **GTCTTT**TAAAT**GAAGAC**CCGTATGAAT**GGC**ATAA**CGAGGGCTT**AACTG  
 Pctr CGCAATCA**CTT** - **GTCTCT**TAAAT**GGAGAC**CTGTATGAAA**GGC**ATCA**CGAGGGCTT**AGCTG  
 Apsa CGTAATCA**CTT** - **GTCTCT**TAAAT**AGGGAC**CTGTATGAAT**GGC**AACA**CGAGGGCTT**AACTG  
 Cabe CGCAATCA**CTT** - **GTCTCT**TAATT**GGGGAC**CCGTATGAAT**GGC**ATAA**CGAGGGCCC**AGCTG  
 Bzze CGCAATCA**CTT** - **GTCTCT**TAAAT**GGAGAC**CTGTATGAAT**GGC**ACGA**CGAGGGCTT**AACTG  
 Siim CGTAATCA**CTT** - **GTCTTT**TAAAT**GAAGAC**CTGTATGAAT**GGC**AAGA**CGAGGGCTT**AACTG  
 Ctru CGCAATCA**CTT** - **GTCTCT**TAAAT**GGAGAC**CTGTATGAAT**GGC**ATAA**CGAGGGCTT**AACTG  
 Dpbr CGCAATCA**CTT** - **GTCTCT**TAAAT**GGAGAC**CTGTATGAAT**GGC**ATAA**CGAGGGCTT**AACTG  
 Caki CGTAATCA**TTT** - **GTCTTT**TAAAT**GAAGAC**CTGTATGAAT**GGC**AAAA**CGAGGGCTT**AACTG  
 Phja CGTAATCA**CTT** - **GTCTTT**TAAAT**GGAGAC**CAGTATGAAT**GGC**ATCA**CGAGGGCTT**AACTG  
 Brsp CGCAATCA**CTT** - **GTCTTT**TAAAT**GAAGAC**CTGTATGAAT**GGC**CCCA**CGAGGGCTT**GACTG  
 Gamo CGTAATCA**CTT** - **GTCTTT**TAAAT**GAAGAC**CTGTATGAAT**GGC**ATCA**CGAGGGCTT**AGCTG  
 Lolo CGTAATCA**CTT** - **GTCTTT**TAAAT**GAAGAC**CTGTATGAAT**GGC**ATCA**CGAGGGCTT**AGCTG  
 Batr CATAATCA**AAT** - **GTCTTT**TAATT**GAAGAC**CCGTATCAA**GGC**TTCA**CGAAGGCTC**AACTG  
 Prmy CGTAATCA**CTT** - **GTCTTT**TAATT**GAAGAC**CTGTATGAAT**GGC**ATCA**CGAGGATTT**AACTG  
 Loli CGTAATCA**CTT** - **GTCTTT**TAAAT**GAGGAC**CAGTATGAAT**GGC**AAAA**CGAGGGCTT**AACTG  
 Loam CGCAATCA**CTT** - **GTCTTT**TAAAT**GAAGAC**CTGTATGAAT**GGC**AAAA**CGAGGGCTT**AGCTG  
 Chab CGTAATCA**TTT** - **GTCTTT**TAAAT**TAAGAC**CAGTATGAAA**GGT**GAGA**CGAGGGCTT**AGCTG  
 Chto CGTAATCA**TTT** - **GTCTTT**TAAAT**TAAGAC**CAGTATGAAA**GGT**GAGA**CGAGGGCTT**AGCTG  
 Majo CGCAATCA**CTT** - **GTCTTT**TAAAT**AAAGAC**CTGTATGAAT**GGC**ATGA**CGAGGGCTT**AACTG  
 Hlst CGCAACCA**CTT** - **GTCTTT**TAAAT**AGAGAC**CTGTATGAAT**GGC**ATCA**CGAGGGCTA**AACTG  
 Clpe CGTAATCA**CTT** - **GTCTTT**TAATT**GGAGAC**CTGTATGAAT**GGC**ATAA**CGAGGGCTC**AACTG  
 Mlmr CGTAATCA**CTT** - **GTCTTT**TAAAT**GGAGAC**CCGTATGAAT**GGC**CTTA**CGAGGGCTT**AGCTG  
 Crcr CGCAATCA**CTT** - **GTCCCT**TAAAT**GAGAAC**CAGTATGAAT**GGC**TAGA**CGAGGGCTT**AACTG  
 Muce CGCAATCA**CTT** - **GTCCCT**TAAAT**GAGAAC**CAGTATGAAT**GGC**TAGA**CGAGGGCTT**AACTG  
 Bege CGCAATCA**CTT** - **GTCTTT**TAAAT**GAAGAC**CCGTATGAAT**GGC**ATAA**CGAGGGCTT**AACTG  
 Mela CGCAATCA**CTT** - **GTCTTT**TAAAT**GAAGAC**CTGTATGAAT**GGC**ACAA**CGAGGGCTC**AACTG  
 Hats CGCAATCA**CTT** - **GTCTTT**TAAAT**GAAGAC**CCGTATGAAT**GGC**ACGA**CGAGGGCTT**AACTG  
 Orla CGCAATCA**CTT** - **GCCTTT**TAAAT**GAGGGC**CTGTATGAAT**GGC**ATAA**CGAGGGCTT**AACTG



Cosa CGCAATCA**CTT** - **GTCTTT**TAAAT**GAAGAC**CTGTATGAAT**GGC**ATAA**CGAGGGCTT**AACTG  
 Exsp CGCAATCA**CTT** - **GTTTT**TAAAT**GGAGAC**CTGTATGAAT**GGC**ATGA**CGAGGGCCA**ACCTG  
 Depa CGCAATCA**CTT** - **GTTTT**TAAAT**GAAGAC**CTGTATGAAT**GGC**ATAA**CGAGGGCTT**AACTG  
 Rima CGTAATCA**TTT** - **GTCTTT**TAAAT**GAAGAC**CTGTATGAAT**GGC**ATAA**CGAGGGCTT**AGCTG  
 Fuol CGCAATCA**CTT** - **GTCTTT**TAAAT**GAAGAC**CTGTATGAAT**GGC**TAAA**CGAGGGCTA**AACTG  
 Gmaf CGTAATCA**CTT** - **GTCTTT**TAAAT**GAAGAC**CCGTATGAAT**GGC**AAAA**CGAGGGCTT**AACTG  
 Xeei CGCAATCA**CTT** - **GTCTTT**TAAAT**GAAGAC**CTGTATGAAT**GGC**AAAA**CGAGGGCTT**AACTG  
 Pros CGCAATCA**CTT** - **GTCTTT**TAAAT**GAAGAC**CCGTATGAAT**GGC**TTGA**CGAGGGCTT**AGCTG  
 Scmi CGCAATCA**CTT** - **GTCTTT**TAAAT**GAAGAC**CCGTATGAAT**GGC**TTGA**CGAGGGCTT**AGCTG  
 Rolo CGCAATCA**CTT** - **GTCTTT**TAAAT**GAAGAC**CCGTATGAAT**GGC**ACAA**CGAGGGCTT**AGCTG  
 Cere CGCAATCA**CTT** - **GTCTTT**TAAAT**GAAGAC**CTGTATGAAT**GGT**ATAA**CGAAGGCTT**AGCTG  
 Daga CGCAATCA**CTT** - **GTCTTT**TAAAT**GAAGAC**CTGTATGAAT**GGC**ACGA**CGAGGGCTT**AACTG  
 Anco CGCAATCA**CTT** - **GTCTTT**TAAAT**GAAGAC**CTGTATGAAT**GGC**ACGA**CGAGGGCTT**AGCTG  
 Dmve CGTAATCA**CTT** - **GTCTTT**TAAAT**GAAGAC**CCGTATGAAC**GGC**ACGA**CGAAGGCC**AGCTG  
 Dmar CGTAATCA**CTT** - **GTCTTT**TAAAT**GAAGAC**CTGTATGAAT**GGC**ACGA**CGAAGGCC**AGCTG  
 Anka CGCAATCA**CTT** - **GTCTTT**TAAAT**GAAGAC**CCGTATGAAT**GGC**ACGA**CGAGGGCTT**AACTG  
 Moja CGCAATCA**CTT** - **GTCTTT**TAAAT**GAAGAC**CCGTATGAAT**GGC**ACGA**CGAGGGCTT**AACTG  
 Hoja CGCAATCA**CTT** - **GTCTTT**TAAAT**GAAGAC**CCGTATGAAT**GGC**ACGA**CGAGGGCTT**AGCTG  
 Bede CGCAATCA**CTT** - **GTCTTT**TAAAT**GAAGAC**CCGTATGAAT**GGC**ATAA**CGAGGGCTT**AGCTG  
 Bosp CGCAATCA**CTT** - **GTCTTT**TAAAT**GAAGAC**CCGTATGAAT**GGC**ATAA**CGAGGGCTT**AGCTG  
 Mysp CGCAATCA**CTT** - **GTCTTT**TAAAT**GAAGAC**CCGTATGAAT**GGC**ATAA**CGAGGGCTT**AGCTG  
 Osja CGCAATCA**CTT** - **GTCTTT**TAAAT**GAAGAC**CCGTATGAAT**GGC**ATAA**CGAGGGCTT**AACTG  
 Sgro CGCAATCA**CTT** - **GTCTTT**TAAAT**GAAGAC**CCGTATGAAT**GGC**ATAA**CGAGGGCTT**AACTG  
 Pzpa CGTAATCA**CTT** - **GTCTTT**TAAAT**GGAGAC**CTGTATGAAT**GGC**ACCA**CGAGGGCTT**AGCTG  
 Zeja CGCAATCA**CTT** - **GTCTTT**TAAAT**GGAGAC**CCGTATGAAT**GGC**ACCA**CGAGGGCTT**AGCTG  
 Znne CGCAATCA**CTT** - **GTCTTT**TAAAT**GAAGAC**CCGTATGAAT**GGC**ACCA**CGAGGGCTT**AGCTG  
 Zefa CGCAATCA**CTT** - **GTCTTT**TAAAT**GAAGAC**CTGTATGAAT**GGC**ATCA**CGAGGGCTT**AGCTG  
 Acni CGCAATCA**CTT** - **GTCTTT**TAAAT**GAAGAC**CCGTATGAAT**GGC**ACCA**CGAGGGCTT**AGCTG  
 Ncrh CGCAATCA**CTT** - **GTCTTT**TAAAT**GAAGAC**CCGTATGAAT**GGC**ACCA**CGAGGGCTT**AGCTG  
 Agca CGCAATCA**CTT** - **GTCTCT**TAAAT**GGAGAC**CTGTATGAAT**GGC**ATAA**CGAGGGCTA**AGCTG  
 Hydy CGCAATCA**CTT** - **GTCTTT**TAAAT**GGAGAC**CTGTATGAAT**GGC**ATAA**CGAGGGCTT**AACTG  
 Gsac CGCAATCA**CTT** - **GTCTTT**TAAAT**GGAGAC**CTGTATGAAT**GGC**ATAA**CGAGGGCTT**AGCTG  
 Pevo CGCAATCA**CTT** - **GTCTTT**TAAAT**GAAGAC**CTGTATGAAT**GGC**ACAA**CGAGGGCTT**AGCTG  
 Hiku CGCAATCA**CTT** - **GTCTTT**TAAAT**AAAGAC**CTGTATGAAT**GGC**ATAA**CGAGGGCTA**AACTG  
 Inpa CGCAATCA**CTT** - **GTCTTT**TAAAT**GAAGAC**CTGTATGAAT**GGC**ACAA**CGAGGGCTT**AACTG  
 Auch CGTAATCA**CTT** - **GTCTTT**TAAAT**TGAGAC**CTGTATGAAC**GGA**ATAA**CGAGGGCTT**AACTG  
 Fico CGCAATCA**CTT** - **GTCTTT**TAAAT**GAAGAC**CTGTATGAAT**GGC**AAGA**CGAGGGCTT**AACTG  
 Macs CGCAATCA**CTT** - **GTCTTT**TAAAT**GAAGAC**CTGTATGAAT**GGC**ACGA**CGAGGGCTT**AACTG  
 Moal CGTAATCA**CTT** - **GTCTTT**TAAAT**GAAGAC**CTGTATGAAT**GGC**ATAA**CGAAGGCTT**AACTG  
 Syma CGCAATCA**TTT** - **GTCTTC**TAAAT**AAAGAC**CTGTATGAAC**GGC**ATAA**CGAGAGCTT**ACCTG  
 Mafr CGCAATCA**CTT** - **GTCTTT**TAAAT**GAAGAC**CTGTATGAAT**GGC**ATAA**CGAAGGCTT**AACTG  
 Dcpe CGTAATCA**CTA** - **GTCTTT**TAAAT**GAAGAC**CCGTATGAAT**GGC**TTAA**CGAGGGCTT**AACTG  
 Dcti CGTAATCA**CTC** - **GTCTTT**TAAAT**GAAGAC**CTGTATGAAT**GGC**TTGA**CGAGGGCTT**GACTG  
 Hehi CGCAATCA**CTT** - **GTCTTT**TAAAT**GAAGAC**CTGTATGAAT**GGC**ACAA**CGAGGGCTT**AACTG  
 Stam CGCAATCA**CTT** - **GTCTTT**TAAAT**GAAGAC**CTGTATGAAT**GGC**ATAA**CGAGGGCTT**AACTG  
 Hogi CGCAATCA**CTT** - **GTCTTT**TAAAT**GGAGAC**CTGTATGAAT**GGC**ATAA**CGAGGGCTT**AACTG  
 Erzo CGCAATCA**CTT** - **GTCTTT**TAAAT**GAAGAC**CTGTATGAAT**GGC**AAAA**CGAGGGCTT**AACTG  
 Hxot CGCAATCA**CTT** - **GTCTTT**TAAAT**GGAGAC**CCGTATGAAT**GGC**ATAA**CGAGGGCTT**AACTG  
 Core CGCAATCA**CTT** - **GTCTTT**TAAAT**GAAGAC**CCGTATGAAT**GGC**ATAA**CGAGGGCTT**AGCTG  
 Apve CGCAATCA**CTT** - **GTCTTT**TAAAT**GAAGAC**CCGTATGAAT**GGC**ATAA**CGAGGGCTT**AACTG  
 Latj CGTAATCA**CTT** - **GTCTTT**TAAAT**GAAGAC**CTGTATGAAT**GGC**ATGA**CGAGGGCTT**AACTG  
 Laja CGTAATCA**CC**T - **GTCTTT**TAAAT**GGAGAC**CTGTATGAAT**GGC**ACGA**CGAGGGCTT**GACTG

Syja CGCAATCA**CTT** - **GTCCTT**TAAAT**AGGGAC**CTGTATGAAT**GGC**ATAA**CGAGGGCTT**AACTG  
 Epme CGCAATCA**CTT** - **GTCTTT**TAAAT**GGGGAC**CTGTATGAAT**GGC**ACAA**CGAGGGCTT**GACTG  
 Grse CGCAATCA**CTT** - **GTCTTT**TAAAT**GGAGAC**CTGTATGAAT**GGC**ATAA**CGAGGGCTT**AACTG  
 Clja CGCAATCA**CTT** - **GTTTCT**TAAAT**GGGGAC**CTGTATGAAT**GGC**TTC**CGAGGGCTT**AACTG  
 Ogcy CGCAATCA**TTT** - **GTCTTT**TAAAT**AAAGAC**CCGTATGAAT**GGC**AAGA**CGAGGGCTT**AACTG  
 Plna CGTAATCA**CTT** - **GTTTTT**TAAAT**GAAGAC**CTGTATGAAT**GGC**ATAA**CGAGGGCTT**AACTG  
 Lema CGCAATCA**CTT** - **GTCTTT**TAAAT**GAAGAC**CTGTATGAAT**GGC**ACAA**CGAGGGCTT**AGCTG  
 Etzo CGCAATCA**CTT** - **GTCTTT**TAAAT**GGAGAC**CTGTATGAAT**GGC**ATAA**CGAGGGCTT**AACTG  
 Apse CGCAATCA**CTT** - **GTCTCT**TAAAT**GGAGAC**CTGTATGAAT**GGC**ATGA**CGAGGGCTT**AGCTG  
 Epde CGCAATCA**CTT** - **GTCTTT**TAAAT**GAAGAC**CTGTATGAAT**GGC**ACCA**CGAGGGCTT**AGCTG  
 Slja CGCAATCA**CTT** - **GCTCTT**TAAAT**GGGGGC**CCGTATGAAT**GGC**GTGA**CGAGGGCTT**GACTG  
 Bsja CGCAATCA**CTT** - **GTCTTT**TAAAT**GGAGAC**CTGTATGAAT**GGC**ATAC**CGAGGGCTT**AACTG  
 Ecna CGTAATCA**CTT** - **GTCTTT**TAAAT**GAAGAC**CTGTATGAAT**GGT**ATGA**CGAGGGCTT**AACTG  
 Cohi CGTAATCA**TTT** - **GTCTTT**TAAAT**GGGGAC**TTGTATGAAT**GGT**ATAA**CGAGGGCTT**AACTG  
 Caar CGTAATCA**CTT** - **GTCTTT**TAAAT**GAAGAC**CTGTATGAAT**GGC**ATAA**CGAGGGCTT**AACTG  
 Came CGTAATCA**CTT** - **GTCTTT**TAAAT**GGAGAC**CTGTATGAAT**GGC**ATAA**CGAGGGCTT**AACTG  
 Mema CGTAATCA**CTT** - **GTCTTT**TAAAT**GGAGAC**CTGTATGAAT**GGC**ACAA**CGAGGGCTT**AGCTG  
 Lenu CACAATCA**CTT** - **GTCCTT**TAAAT**GGGGAC**CTGTATGAAT**GGT**ATGA**CGAGGGCTT**AGCTG  
 Brja CGCAATCA**CTT** - **GTCTTT**TAAAT**GAAGAC**CTGTATGAAT**GGC**ACGA**CGAGGGCTT**AACTG  
 Plma CGCAATCA**CTT** - **GTCTTT**TAAAT**GGAGAC**CTGTATGAAT**GGC**ATAA**CGAGGGCTT**AACTG  
 Emst CGCAATCA**CTT** - **GTCTTT**TAAAT**GGAGAC**CTGTATGAAT**GGC**ATAA**CGAGGGCTT**AGCTG  
 Ptti CGCAATCA**CTT** - **GTCTTT**TAAAT**GGAGAC**CTGTATGAAT**GGC**ATAA**CGAGGGCTT**AGCTG  
 Losu CGCAATCA**CTT** - **GTCCTT**TAAAT**GGGGAC**CAGTATGAAT**GGC**ATCA**CGAGGGCTT**AACTG  
 Geoy CGCAATCA**CTT** - **GTCCTT**TAAAT**GAAGAC**CCGTATGAAT**GGC**ATCA**CGAGGGCTT**TACTG  
 Dipi CGCAATCA**CTT** - **GTCTCT**TAAAT**GGGGAC**CCGTATGAAT**GGC**ATAA**CGAGGGCTT**AGCTG  
 Pama CGCAATCA**CTT** - **GTCTTT**TAAAT**GGAGAC**CTGTATGAAT**GGC**ATCA**CGAGGGCTT**AACTG  
 Leob CGTAATCA**CTT** - **GTCTCT**TAAAT**GGGGAC**CTGTATGAAT**GGC**ATAA**CGAGGGCTT**AACTG  
 Neba CGCAATCA**CTT** - **GCCCTT**TAAAT**GGGGGC**CCGTATGAAT**GGC**ATCA**CGAGGGCTT**ATCTG  
 Pdpi CGTAATCA**CTT** - **GTCTTT**TAAAT**GGAGAC**CTGTATGAAT**GGC**AAGA**CGAGGGCTT**AACTG  
 Nimi CGCAATCA**CTT** - **GTCTTC**TAAAT**AGAGAC**CCGTATGAAT**GGT**AAAA**CGAGGGCTT**AACTG  
 Uptr CGCAATCA**CTT** - **GTCTTT**TAAAT**GGAGAC**CTGTATGAAT**GGC**ATAA**CGAGGGCTT**GACTG  
 Pesc CGTAATCA**CTT** - **GTCTCT**TAAAT**GGAGAC**CTGTATGAAT**GGC**AAGA**CGAGGGCTT**AACTG  
 Baar CGAAATCA**TTT** - **GTCTTT**TAAAT**GGGGAC**CAGTATGAAT**GGC**ACAA**CGAGGGCTT**AGCTG  
 Moar CGCAATCA**CTT** - **GTCTTT**TAAAT**GAAGAC**CTGTATGAAT**GGC**ATAA**CGAGGGCTT**AGCTG  
 Toja CGTAATCA**CTT** - **GTCTTT**TAAAT**GAAGAC**CTGTATGAAT**GGC**AAGA**CGAGGGCTT**AACTG  
 Chau CGCAATCA**CTT** - **GTCTTT**TAAAT**GAAGAC**CTGTATGAAT**GGC**ACAA**CGAGGGCTT**AACTG  
 Chse CGAAATCA**CTT** - **GTCTTT**TAAAT**GGAGAC**CTGTATGAAT**GGC**ATAA**CGAGGGCTT**AACTG  
 Enar CGCAATCA**CTT** - **GTCTTT**TAAAT**GGAGAC**CTGTATGAAT**GGC**ACGA**CGAGGGCTT**AGCTG  
 Hpty CGCAATCA**CTT** - **GTCTTT**TAAAT**GGAGAC**CTGTATGAAT**GGC**ACGA**CGAGGGCTT**AGCTG  
 Nana CGCAATCA**CTT** - **GTCTTT**TAAAT**GAAGAC**CTGTATGAAT**GGC**ATAA**CGAGGGCTT**AGCTG  
 Mcst CGCAATCA**CTT** - **GTCTTT**TAAAT**GAAGAC**CCGTATGAAT**GGC**ATAA**CGAGGGCTT**AACTG  
 Rhox CGTAATCA**CTT** - **GTCTTT**TAAAT**GGAGAC**CCGTATGAAT**GGC**ATGA**CGAGGGCTT**AACTG  
 Opfa CGCAATCA**CTT** - **GTCTTT**TAAAT**GGAGAC**CCGTATGAAT**GGC**ATAA**CGAGGGCTT**AACTG  
 Paar CGCAATCA**CTT** - **GTCTTT**TAAAT**GGAGAC**CTGTATGAAT**GGC**ATAA**CGAGGGCTT**GACTG  
 Gozo CGAAATCA**CTT** - **GTCTTT**TAAAT**GAAGAC**CTGTATGAAT**GGC**ACGA**CGAGGGCTT**AACTG  
 Ackr CGCAATCA**CTT** - **GTCTTT**TAAAT**GGAGAC**CCGTATGAAT**GGC**ATAA**CGAGGGCTT**AACTG  
 Elev CGCAATCA**ATT** - **GTCTTT**TAAAT**GAAGAC**CTGTATGAAT**GGC**ATAA**CGAGGGCTT**AACTG  
 Trdu CGCAATCA**CTT** - **GTCTTT**TAAAT**GAAGAC**CTGTATGAAT**GGC**ATAA**CGAGGGCTT**AACTG  
 Amoc CGCAATCA**CTT** - **GTCTTT**TAAAT**GAAGAC**CTGTATGAAT**GGC**ACGA**CGAGGGCTT**AACTG  
 Hame CGCAATCA**CTT** - **GTCTTT**TAAAT**GGAGAC**CTGTATGAAT**GGC**ATCA**CGAGGGCTT**AACTG  
 Chso CGCAATCA**CTT** - **GTCTTT**TAAAT**GGAGAC**CTGTATGAAT**GGC**ACGA**CGAGGGCTT**AACTG  
 Lyto CGCAATCA**CTT** - **GTCTTT**TAAAT**GAAGAC**CTGTATGAAT**GGC**ATAA**CGAGGGCTT**AACTG

|      |          |     |   |        |       |        |            |     |      |     |        |       |
|------|----------|-----|---|--------|-------|--------|------------|-----|------|-----|--------|-------|
| Encr | CGCAATCA | CTT | - | GTCTTT | TAAAT | GAAGAC | CTGTATGAAT | GGC | ATAA | CGA | GGGCTT | AACTG |
| Bvar | CGAAATCA | CTT | - | GTCTTT | TAAAT | GGGGAC | CTGTATGAAT | GGC | ATGA | CGA | GGGCTT | AACTG |
| Noco | CGCAATCA | CTT | - | GTCTCT | TAAAT | GGAGAC | CTGTATGAAT | GGC | ACGA | CGA | GGGCTT | AGCTG |
| Chsp | CGCAATCA | CTT | - | GTCTCC | TAAAT | GAAGAC | CTGTATGAAT | GGC | AAGA | CGA | GGGCTT | AACTG |
| Arja | CGCAATCA | CTT | - | GTCTTT | TAAAT | GGAGAC | CCGTATGAAT | GGC | ATAA | CGA | GGGCTT | AGCTG |
| Pase | CGCAATCA | CTT | - | GTCTTT | TAAAT | GGAGAC | CCGTATGAAT | GGC | TAAA | CGA | GGGCTT | AACTG |
| Trel | CGCAATCA | CTT | - | GTCCCT | TAAAT | GAAGAC | CTGTATGAAT | GGC | ATTA | CGA | GGGCTT | AGCTG |
| Lifa | CGTAATCA | CCT | - | GTCTTT | TAAAT | GAAGAC | CTGTATGAAT | GGC | CTCA | CGA | GGGCTT | TACTG |
| Acur | CGCAATCA | CTT | - | GTCTTT | TAAAT | GAAGAC | CCGTATGAAT | GGT | CAAA | CGA | GGGCTT | AACTG |
| Ampe | CGCAATCA | CTT | - | GTCTTT | TAAAT | GGAGAC | CTGTATGAAT | GGC | ATAA | CGA | GGGCTT | AGCTG |
| Urja | CGCAATCA | CTT | - | GTCCCT | TAAAT | GAAGAC | CTGTATGAAT | GGC | ACAA | CGA | GGGCTT | AACTG |
| Enet | CGCAATCA | CTT | - | GTCTTT | TAAAT | AGAGAC | CTGTATGAAT | GGC | ACAA | CGA | GGGCTT | AACTG |
| Ptbr | CGCAATCA | CTT | - | GTCCCT | TAAAT | AGGGAC | CTGTATGAAT | GGC | ACAA | CGA | GGGCTT | AACTG |
| Safa | CGCAATCA | CTT | - | GTCTTT | TAAAT | GAAGAC | CTGTATGAAT | GGC | ATAA | CGA | GGGCTT | GACTG |
| Icae | CGCAATCA | CTT | - | GTCTTT | TAAAT | GGAGAC | CTGTATGAAT | GGC | ATAA | CGA | GGGCTT | AACTG |
| Asmi | CGTAATCA | CTT | - | GTCTTT | TAAAT | GAAGAC | CTGTATGAAT | GGC | AAAA | CGA | GGGCTT | AACTG |
| Foal | CGTAATAA | CTT | - | GTCTTT | TAAAT | GAAGAC | TGGTATGAAT | GGC | ATCA | CGA | GGGCTT | GACTG |
| Drze | CGCAATCA | CTT | - | GTCTTT | TAAAT | GAAGAC | CAGTATGAAT | GGC | ACAA | CGA | GGGCTT | CACTG |
| Rhas | CGCAATCA | CTT | - | GTCTTT | TAAAT | GAAGAC | CTGTATGAAT | GGC | ATAA | CGA | GGGCTT | AGCTG |
| Elac | CGCAATCA | CTT | - | GTCTTT | TAAAT | GGAGAC | CTGTATGAAT | GGC | ATAA | CGA | GGGCTT | AGCTG |
| Kugu | CGCAATCA | CTT | - | GTCTTT | TAAAT | GAAGAC | CCGTATGAAT | GGC | ATAA | CGA | GGGCTT | AACTG |
| Plor | CGCAATCA | CTT | - | GTCCCT | TAAAT | GAAGAC | CTGTATGAAT | GGC | ACGA | CGA | GGGCTT | GACTG |
| Sgun | CGCAATCA | CTT | - | GTCTTT | TAAAT | GGAGAC | CTGTATGAAT | GGC | ATAA | CGA | GGGCTT | AGCTG |
| Zaco | CGCAATCA | CTT | - | GCCTTT | TAAAT | GAAGGC | CCGTATGAAT | GGC | ACGA | CGA | GGGCTT | AGCTG |
| Zbfl | CGCAATCA | CTT | - | GTCTTT | TAAAT | GGAGAC | CTGTATGAAT | GGC | ACAA | CGA | GGGCTT | AACTG |
| Spba | CGTAATCA | CTT | - | GTCTTT | TAAAT | GAAGAC | CCGTATGAAT | GGC | GGAA | CGA | GGGCTT | AACTG |
| Game | CGCAATCA | CTT | - | GTCTTT | TAAAT | GGAGAC | CTGTATGAAT | GGC | ATTA | CGA | GGGCTT | AACTG |
| Thth | CGCAATCA | CTT | - | GTCTTT | TAAAT | GGAGAC | CTGTATGAAT | GGC | ATTA | CGA | GGGCTT | AACTG |
| Xigl | CGTAATCA | CTT | - | GTCTTT | TAAAT | GAAGAC | CTGTATGAAT | GGC | ATAA | CGA | GGGCTT | AGCTG |
| Hyja | CGTAATCA | CTT | - | GTCTTT | TAAAT | GGAGAC | CTGTATGAAT | GGC | ATTA | CGA | GGGCTT | AACTG |
| Psan | CGTAATCA | CTT | - | GTCTTT | TAAAT | GGAGAC | CTGTATGAAT | GGC | ATTA | CGA | GGGCTT | AACTG |
| Cupa | CGCAATCA | CTT | - | GTCTTT | TAAAT | GGAGAC | CTGTATGAAT | GGC | ATAA | CGA | GGGCTT | AACTG |
| Mpch | CGCAATCA | CTT | - | GTCTTT | TAAAT | GAAGAC | CTGTATGAAT | GGC | ACGA | CGA | GGGCTT | GACTG |
| Char | CGCAATCA | CTT | - | GTCTTT | TAAAT | GAAGAC | CCGTATGAAT | GGC | ATAA | CGA | GGGCTT | AACTG |
| Pser | CGTAATCA | CTT | - | GTCTTT | TAAAT | GGAGAC | CTGTATGAAT | GGT | AAAA | CGA | GGGCTT | AACTG |
| Prol | CGTAATCA | CTT | - | GTCTTT | TAAAT | GAAGAC | CCGTATGAAT | GGC | ATAA | CGA | GGGCTT | AGCTG |
| Plbi | CGTAATCA | CTT | - | GTCTTT | TAAAT | GAAGAC | CTGTATGAAT | GGC | ATAA | CGA | GGGCTT | AACTG |
| Calu | CGCAATCA | CTT | - | GTCTTT | TAAAT | GAAGAC | CTGTATGAA  | GGT | ATGA | CGA | GGGCTT | GACTG |
| Papa | CGCAATCA | CTT | - | GTCTTT | TAAAT | GAAGAC | CCGTATGAAT | GGC | AAGA | CGA | GGGCTT | AACTG |
| Sufr | CGCAATCA | CTT | - | GTCTCT | TAAAT | GGGGAC | CTGTATGAAT | GGC | ATAA | CGA | GGGCTT | AACTG |
| Stci | CGTAATCA | CTT | - | GTCTCT | TAAAT | AGAGAC | CTGTATGAAT | GGC | ATGA | CGA | GGGCTT | AGCTG |
| Taru | CGCAATCA | CTT | - | GTCCCT | TAAAT | GTGGAC | CTGTATGAAT | GGC | ATAA | CGA | GGGCTT | AGCTG |
| Rala | CGCAATCA | CTT | - | GTCTTT | TAAAT | GGAGAC | CTGTATGAAT | GGC | ACGA | CGA | GGGCTT | AACTG |

\* \* \* \* \* \* \* \* \* \* \* \* \* \* \* \* \* \*

|      | 32'          | 31'    | 25'      | A'      | 41    | 41'      | 42                 |
|------|--------------|--------|----------|---------|-------|----------|--------------------|
| Scca | TCTCTACTCTC  | -TAATC | AATGAAAT | TIGATCT | TCTCC | TGCAGAAG | CGAGTATGATAACATAA  |
| Muma | TCTCTATTTTC  | -TAATC | AATGAAAT | TIGATCT | ATTCC | TGCAGAAG | CGAATATAATAACATTA  |
| Erca | TCTCTTTTTCTC | -CTGTC | AATTAAC  | TIGATCT | ACCCC | TGCAGAAG | CGGGTATAAAAACATAA  |
| Pose | TCTCTTTTTCTC | -CTGTC | AATTAAC  | TIGATCT | ACCCC | TGCAGAAG | CGGGTATAAAAACATAA  |
| Actr | TCTCCTTTTTC  | -CAGTC | AGTGAAAT | TIGACCT | GCTCC | TGCAGAGG | CGAGCATAACCCCATAA  |
| Scal | TCTCCTTTTTC  | -CAGTC | AGTGAAAT | TIGACCT | GCTCC | TGCAGAGG | CGAGCATAACCCCATAA  |
| Posp | TCTCCTTTTTC  | -CAGTC | AGTGAAAT | TIGACCT | GCTCC | TGCAGAGG | CGAGCATAACCCATAA   |
| Atsp | TCTCCTTTTTC  | -CAGTC | AATGAAAT | TIGATCT | GCCCC | TGCAGAAG | CGGACATATAAACATAA  |
| Leoc | TCTCCTTTTTC  | -CAGTC | AATGAAAT | TIGATCT | GCCCC | TGCAGAAG | CGGACATGTAAACATAA  |
| Amca | TCTCTCTTTTC  | -CAGTC | AATGAAAT | TIGATCT | GCCCC | TGCAGAAG | CGGACATATGCCATAA   |
| Osbi | TCTCCTTCCTC  | -AAGTC | AGTGAAAT | TIGATCT | ATTCC | TGCAGAAG | CGAATATCACAAATAA   |
| Pabu | TCTCCTTCCCC  | -AAGTC | ATGAAAT  | TIGATCT | GCCCC | TGCAGAAG | CGGACATAAATAATAA   |
| Hial | TCTCCTTTTTCC | -CAGTC | AATGAAAT | TIGATCT | GCCCC | TGCAGAAG | CGGGCATGTAAACATAA  |
| Elha | TCTCCCGCCTC  | -CAGTC | AATGAAAT | TIGATCT | GCCCC | TGCAGAAG | CGGACATAATAACATAA  |
| Mlcy | TCTCCTACCCC  | -CAGTC | AATGAAAT | TIGATCT | GCCCC | TGCAGAAG | CGGACATAAAAAATAA   |
| Algl | TCTCCTATCCC  | -TAATC | AGTGAAAT | TIGATCT | GTCCC | TGCAGAAG | CGGGCATAAAGATAA    |
| Ptgi | TCTCCTCCCCC  | -CAGTC | AATGAAAT | TIGATCT | GCCCC | TGCAGAAG | CGGACATAAAAAATAA   |
| Alaf | TCTCCTCTCCC  | -CAGTC | AATGAAAT | TIGATCT | GCCCC | TGCAGAAG | CGGACATAAAAAATAA   |
| Nock | TCTCCTCTCTT  | -CGGTC | AATGAAAT | TIGATCT | GCCCC | TGCAGAAG | CGGACATAAACAATAA   |
| Anja | TCTCCTTCCCC  | -TAGTC | AATGAAAT | TIGATCT | GCCCC | TGCAGAAG | CGGACATAAATAATAA   |
| Gyki | TCTCCTTTTTCC | -TGTC  | AATGAAAC | TIGATCT | GCCCC | TGCAGAAG | CGGGCATGTTAAATAA   |
| Syka | TCTCCTTCCCC  | -CAGTC | AATGAAAT | TIGATCT | GCCCC | TGCAGAAG | CGGACATAAAAAATAA   |
| Opma | TCTCCTTCCCC  | -CAGTC | AATGAAAT | TIGATCT | GCCCC | TGCAGAAG | CGGACATAACAAATAA   |
| Comy | TCTCCTCCCCC  | -CAGTC | AATGAAAT | TIGATCT | ACCCC | TGCAGAAG | CGGGTATAAAAAATAA   |
| Sasp | TCTCCCCCCCC  | -CAGTC | AATGAAAT | TIGATCT | ACCCC | TGCAGAAG | CGGGTACAACCATAA    |
| Eupe | TCTCCTTCCCC  | -CAGTC | AATGAAAT | TIGATCT | GCCCC | TGCAGAAG | CGAGCATAAACAATAA   |
| Enja | TCTCTTTTTTC  | -TAGTC | AGTTAAAC | TIGATCT | GTCCC | TGCAGAAG | CGGACATAAATAATAGAA |
| Same | TCTCTTTTTTC  | -CGGTC | AATGAAAC | TIGATCT | GCCCC | TGCAGAAG | CGGGCATATTCAACAA   |
| Chch | TCTCTCCTCCC  | -CAGTC | AGTGAAAT | TIGATCT | GTCCC | TGCAGAAG | CGGACATTATACAGAA   |
| Grgr | TCTCCCTCCCC  | -CAGTC | AGTGAAAT | TIGATCT | GTCCC | TGCAGAAG | CGGACATTACCCCGAA   |
| Caau | TCTCCCTTTTC  | -CAGTC | AGTGAAAT | TIGATCT | ACCCC | TGCAGAAG | CGGGTATAATAATAGAA  |
| Cyca | TCTCCCTTTTC  | -AAGTC | AGTGAAAT | TIGATCT | ACCCC | TGCAGAAG | CGGGTATAATAATAGAA  |
| Dare | TCTCCCCATC   | -AAGTC | AGTGAAAT | TIGATCT | ATCCC | TGCAGAAG | CGGATATAATAATAGAA  |
| Cost | TCTCCCTTTTC  | -CAGTC | AGTGAAAT | TIGATCT | GCCCC | TGCAGAAG | CGGACATAAAAAATAGAA |
| Leec | TCTCCCTTTTC  | -TAGTC | AGTGAAAT | TIGATCT | ACCCC | TGCAGAAG | CGGGTATAATAATAGAA  |
| CrIa | TCTCCCTTTTC  | -AAGTC | AGTGAAAT | TIGATCT | GCCCC | TGCAGAAG | CGGACATAAAACATAGAA |
| Clmc | TCTCCCTTTTT  | -AGGTC | AGTGAAAT | TIGATCT | GCCCC | TGCAGAAG | CGGGCATAAACAATAGAA |
| Phin | TCTCCCCCTCC  | -CAGTC | AATGAAAC | TIGATCT | GTTCC | TGCAGAAG | CGAACATATACATAGAA  |
| Icpu | TCTCCCTTTTC  | -AAGTC | AATGAAAT | TIGATCT | GCCCC | TGCAGAAG | CGGACATATAAAATAGAA |
| Psto | TCTCCCTTTTC  | -AAGTC | AATGAAAT | TIGATCT | GCCCC | TGCAGAAG | CGGACATAAAACATAGAA |
| Cora | TCTCCCTTTTC  | -AGGTC | AATGAAAT | TIGATCT | GCCCC | TGCAGAAG | CGGGTATACAAAATAGAA |
| Eisp | TCTCCCTTTTC  | -TAGTC | AGTGAAAT | TIGATCT | GCCCC | TGCAGAAG | CGGACATAAAACATAGAA |
| Apal | TCTCCCTTTTC  | -AGGTC | AGTGAAAT | TIGATCT | GCCCC | TGAAGAAG | CGGACATACTTAATAGAA |
| EsLu | TCTCCTCTTTC  | -AAGTC | AATGAAAT | TIGATCT | GCCCC | TGCAGAAG | CGGACATAAGAAATAGAA |
| Dape | TCTCCTTTTTTC | -AAGTC | AATGAAAT | TIGATCT | GCCCC | TGCAGAAG | CGGACATAAATAATAGAA |
| Glse | TCTCCTTCTCC  | -CAGTC | AATGAAAT | TIGATCT | CCCCC | TGCAGAAG | CGGGCATTAACCATAGAA |
| Naar | TCTCCTTCTCT  | -TCGTC | AATGAAAT | TIGATCT | TCCCC | TGCAGAAG | CGGGAATATATACGTAA  |
| Baoc | TCTCCTTCTCT  | -TCGTC | AATGAAAT | TIGATCT | CCCCC | TGCAGAAG | CGGGCATAAAAATAGAA  |
| Opso | TCTCCCTCTCC  | -TAGTC | AATGAAAT | TIGATCT | CCCCC | TGCAGAAG | CGGGCATAGAACATAGAA |
| Alte | TCTCCTTTTTCC | -AAGTC | AATGAAAT | TIGATCT | ACCCC | TGCAGAAG | CGGGTATACCCATAGAA  |
| Plap | TCTCCTTTTTCC | -AAGTC | AATGAAAT | TIGATCT | ACCCC | TGCAGAAG | CGGGTATACCCATAGAA  |

Plal TCTCCTCCCC -CAGTCAATGAAATTTGATCTCCCC TGCAGAAGCGGGCATTCTCCATIAA  
 Sami TCTCCTCCCC -CAGTCAATGAAATTTGATCTCCCC TGCAGAAGCGGGCATTACACATIAA  
 Rere TCTCCTCTCCC -CAGTCAAGTAAATTTGATCTCCCC TGCAGAAGCGGGCATTGTAGCATIAA  
 Gama TCTCCTTCTCC -AAGTCAAGTAAATTTGATCTCCCC TGCAGAAGCGGGCATTCCCTCATIAA  
 Onmy TCTCCTCTTCC -AAGTCAATGAAATTTGATCTGCCCC TGCAGAAGCGGACATAAGCATIAA  
 Sasa TCTCCTCTTCC -AAGTCAATGAAATTTGATCTGCCCC TGCAGAAGCGGACATAAACACATIAA  
 Cola TCTCCTCTTCC -AAGTCAAGTAAATTTGATCTGCCCC TGCAGAAGCGGACATAAGTACATIAA  
 Dita TCTCCTCTCCC -CAGTCAATGAAATTTGATCTCCCC TGCAGAAGCGGGCATCCCGATATAA  
 Gogr TCTCCTCTCCC -TAGTCAATGAAATTTGATCTCCCC TGCAGAAGCGGACTTTTCCATIAA  
 Chsl TCTCCTTTCCC -CAGTCAATGAAATTTGATCTTCCCC TGCAGAAGCGGATACCTATATAA  
 Atja TCTCCTTATCC -CAGTCAATGAAATTTGATCTCCCC TGCAGAAGCGGGCATAACACATIAA  
 lido TCTCCTTGCCC -CAGTCAATGAAATTTGATCTCCCC TGCAGAAGCGGGCATAACACATIAA  
 Auja TCTCCCCCTC -CAGTCAATGAAATTTGATCTCCTCC TGCAGAAGCGAGCATACCCCATIAA  
 Chag TCTCCCTATC -CTGTTAGTAAATTTGATCTCCCC TGCAGAAGCGGGCATAACTACATIAA  
 Hami TCTCCCTACCC -CAGTCAATGAAATTTGATCTTCCCC TGCAGAAGCGGATAACACATIAA  
 Saun TCTCCCCCTC -TAGTCAATGAAATTTGATTTTCCCC TGCAGAAGCGGATAGTCTCCATIAA  
 Nema TCTCCCTTTA -AAGTCAATGAAATTTGATCTCCCC TGCAGAAGCGGGCATAGCCTCGTAA  
 Disp TCTCCCTTTA -AGTCAATGAAATTTGATCTCCCC TGCAGAAGCGGGCATATACTCGTAA  
 Myaf TCTCCCTTTA -TAGTCAATGAAATTTGATCTCCCC TGCAGAAGCGGGCATACACTCGTAA  
 Lagu TCTCCCTTCT -CCGTCAAGTAAAATTTGACCTACCCC TGCAGAGGCGGGTACACCCCACAA  
 Trtr TCTCCCCCTT -CGGTCAATGAAATTTGATCTCCCC TGCAGAAGCGGGCATACTCCACAA  
 Zucr TCTCCCTTCT -ATGTCATGAAATTTGATTTCCCC TGCAGAAGCGGGCATGCAGTACAA  
 Pxja TCTCCCTTTT -TAGTCAATGAAATTTGATCTCCCC TGCAGAAGCGGGCATAAAAAATIAA  
 Pxlo TCTCCCTTTT -TAGTCAATGAAATTTGATCTCCCC TGCAGAAGCGGGCATAAAAAATIAA  
 Pctr TCTCCTTTTT -CAGTCAATGAAATTTGATCTCCCC TGCAGAAGCGGGCATGCGCATIAA  
 Apsa TCTCCTTTTT -CAGTCAAGTAAATTTGATCTCCCC TGCAGAAGCGGGCATAAAAAATIAA  
 Cabe TCTCTTCTTC -GAGTCAATGAAATTTGATCTTCCCC TGCAAAAGCGGGCATGAACAACACG  
 Bzze TCTCCCTTCT -AAGTCAATGAAATTTGATCTCCCC TGCAGAAGCGGGCATAAACACATIAA  
 Siim TCTCCCTTTT -TGGTCAATGAAATTTGATCTCCCC TGCAGAAGCGGGCTAGCCACATTA  
 Ctru TCTCCTTTTT -CAGTCAATGAAATTTGATCTTCCCC TGCAGAAGCGGATTTTATAATIAA  
 Dpbr TCTCCTTTTT -CAGTCAATGAAATTTGATCTTCCCC TGCAGAAGCGGATAAAAAATIAA  
 Caki TCTCCCTTCC -CAGTCAATGAAATTTGACCTCCCC TGCAGAGGCGGGCATACAACATATAA  
 Phja TCTCCCTTCT -TAGTCAATGAAATTTGACCTTCCCC TGCAGAGGCGGATAACTATATAA  
 Brsp TCTCCTTCCC -CAGTCAATGAAATTTAAACTTCCCC TGCAGATGCGGATAATGTACATIAA  
 Gamo TCTCCATCTC -CAGTCAATGAAATTTGACCTCCCC TGCAGAGGCGGGCATAATTACATIAA  
 Lolo TCTCCCTCTC -CAGTCAATGAAATTTGACCTCCCC TGCAGAGGCGGGCATAATTACATIAA  
 Batr TCTCCCCCTC -CAGTCAATGAAATTTGTCCTCTTCC TGAAGAAGCGAACATTAAAAATATAA  
 Prmy TCTCTATTTT -TAATCAATAAAATTTGTTCTCTTCC TGCAGAAAAGAACATACCCATATAA  
 Loli TCTCCCCCTC -CAGTCAATGAAATTTGATCTCCCC TGAAGAAGCGGGCATACACCATIAA  
 Loam TCTCCTCCCC -CAGTCAATGAAATTTGATCTCCCC TGAAGAAGCGGGCATACTTACATIAA  
 Chab TCTCCTCCCTC -CAGTCAATGAAATTTGATCTCCCC TGCAGAAGCGGGCATTTTAAATIAA  
 Chto TCTCCTCCCTC -CAGTCAATGAAATTTGATCTCCCC TGCAGAAGCGGGCATTTTAAATIAA  
 Majo TCTCCTTTCC -CGGTCAATGAAATTTGATCTCCCC TGAAGAAGCGGGCATATAACATATAA  
 Hlst TCTCCTTTTT -CAGTCAATGAAATTTGATCTCCCC TGAAGAAGCGGGCATAAAGCTATATAA  
 Clpe TCTCCTCTATC -TAGTCAAGTAAATTTGATTTCCCC TGCAGAAGCGGGCATAAACCATIAA  
 Mlmr TCTCCTCTCTC -CAGTCAATGAAATTTGATCTCCCC TGCAGAAGCGGGCATGACTACATIAA  
 Cr cr TCTCCTTTTT -CAACCAATGAAATTTGATCTTCCCC TGCAGAAGCGGATAACTAACATIAA  
 Muce TCTCCTTTTT -CAACCAATGAAATTTGATCTTCCCC TGCAGAAGCGGATAACCAACATIAA  
 Bege TCTCCTTTTT -TAGTCAATGAAATTTGATCTCCCC TGCAGAAGCGGGCATACAACATIAA  
 Mela TCTCCTTTTT -CAGTCAATGAAATTTGATCTCCCC TGCAGAAGCGGGCATAAACCATIAA  
 Hats TCTCCTTTTT -TAGTCAATGAAATTTGATCTCCCC TGCAGAAGCGGGCATAAACCATIAA  
 Or la TCTCCTCTCCC -TAGTCAATGAAATTTGATCTCCCC TGCAGAAGCGGGCATAAAAAATIAA

Cosa TCTCCTTTTT - CAGTCAATGAAATTTGATTTCTCCCTGCAGAAGCTGACATATTTACATAA  
 Exsp TCTCCTTCTCC - TAGTCAATGAAATTTGATCTCCCCCGGCATAAGTACATAA  
 Depa TCTCCTTTTT - CAGTCAATGAAATTTGATCTCCCCCGGCATAAACCCATAA  
 Rima TCTCATCCTCC - CAGTCAATGAAATTTGATCTCCCCCGGCATAAACACATAA  
 Fuol TCTCCTTCCCT - AAGTCAATGAAATTTGATCTTCCCGGCATAAATAATACATAA  
 Gmaf TCTCCTCCCC - CAGTCAATGAAATTTGATCTCCCCCGGCATAAACACATAA  
 Xeei TCTCCTTCCCT - AAGTCAATGAAATTTGATCTTCCCGGCATAACTCACATAA  
 Pros TCTCTTTTCTC - CGTCAATGAAATTTGATCTCCCCCGGCATAATCCGATAA  
 Scmi TCTCTTTTCTC - TAGTCAATGAAATTTGATCTCCCCCGGCATAATTTACATAA  
 Rolo TCTCCTTTTT - TAGTCAATGAAATTTGATCTCCCCCGGCATTATAACATAA  
 Cere TCTCCTTTTT - CAGTCAATGAAATTTGATCTCCCCCGGCATAAAAAACATAA  
 Daga TCTCCTTTTT - TAGTCAATGAAATTTGATCTTCCCGGCATGACATACATAA  
 Anco TCTCCTTTTT - AAGTCAATGAAATTTGATCTTCCCGGCATAACTATACATAA  
 Dmve TCTCCTTTTT - AAGTCAATGAAATTTGATCTTCCCGGCATGTTAAACATAA  
 Dmar TCTCCTTTTT - AAGTCAATGAAATTTGATCTTCCCGGCATGACAAACATAA  
 Anka TCTCCTCTTT - AAGTCAATGAAATTTGATCTTCCCGGCATAGCCACATAA  
 Moja TCTCCTTTTT - AAGTCAATGAAATTTGATCTTCCCGGCATAACTACATAA  
 Hoja TCTCCTTTTT - AAGTCAATGAAATTTGATCTTCCCGGCATAAACACATAA  
 Bede TCTCTTTTCTCAAGTCAATGAAATTTGATCTCCCCCGGCATACAAAACATAA  
 Bosp TCTCTTTTCTCAAGTCAATGAAATTTGATCTCCCCCGGCATACAAAACATAA  
 Mysp TCTCCTTTTT - CAGTCAATGAAATTTAATCTCCCCCGGCATACAAACATAA  
 Osja TCTCCTTTTT - CAGTCAATGAAATTTAATCCCCCCCGGCATAAATCCATAA  
 Sgro TCTCCTTTTT - CAGTCAATGAAATTTGATCTCCCCCGGCATATAACATAA  
 Pzpa TCTCCTTTTT - AAGTCAATGAAATTTGATCTCCCCCGGCATAACTACATAA  
 Zeja TCTCCTTTTT - TAGTCAATGAAATTTGATCTCCCCCGGCATATTCACATAA  
 Znne TCTCCTTTTT - AAGTCAATGAAATTTGATCTCCCCCGGCATGAATAATACATAA  
 Zefa TCTCCTTTTT - AAGTCAATGAAATTTGATCTCCCCCGGCATAATAATACATAA  
 Acni TCTCCTTTTT - AAGTCAATGAAATTTGATCTCCCCCGGCATAATAACATAA  
 Ncrh TCTCCTTTTT - AAGTCAATGAAATTTGATCTCCCCCGGCATAATAACATAA  
 Agca TCTCCTCTTT - AAGTCAATGAAATTTGATTTCCCCCGGCATACCCACATAA  
 Hydy TCTCCTTTTT - CGTCAATGAAATTTGATCTCCCCCGGCATACTACATAA  
 Gsac TCTCCTTTTT - CAGTCAATGAAATTTGATCTCCCCCGGCATTACTACATAA  
 Pevo TCTCCTTTCCC - CAGTCAATGAAATTTGATCTCCCCCGGCATTTACCATAA  
 Hiku TCTCCTCACCC - CAGTTAATGAAATTTGATCTTCCCGGCATTAACACATAA  
 Inpa TCTCCTCTTT - TAGTCAATGAAATTTGATCTCCCCCGGCCTACAAGCATAA  
 Auch TCTCCTCCCTC - CAGTCAATGAAATTTGATCTCCCCCGGCATTTCCACATAA  
 Fico TCTCCTCCCC - CAGTCAATGAAATTTGATCTTCCCGGCATATGCCATAA  
 Macs TCTCCTTTCTC - CAGTCAATGAAATTTGATCTCCCCCGGCATAAAGCCATAA  
 Moal TCTCCTCTTTA - AAGTCAATAAAATTTGATCTCCCCCGGCATTACACATAA  
 Syma TCTCCTCTTTA - AAGTCAATAAAATTTGATCTCCCCCGGCATAAACACATAA  
 Maf r TCTCCTTTCTC - TAGTCAATGAAATTTGATCTCCCCCGGCATAACTCCATAA  
 Dcpe TCTCCTCTTT - AAATCAATGAAATTTGATCTCCCCCGGCATATGCCATAA  
 Dct i TCTCCTCTTT - AAATCAATGAAATTTGATCTCCCCCGGCATATGACATAA  
 Hehi TCTCCTCTTT - AAGTCAATGAAATTTGATCTCCCCCGGCATATAAACATAA  
 Stam TCTCCTCTTT - AAGTCAATGAAATTTGATCTCCCCCGGCATAACCTCATAA  
 Hogi TCTCCTTTTT - CGTCAATGAAATTTGATCTCCCCCGGCATACTAACATAA  
 Erzo TCTCCTCTCTC - CAGTCAATGAAATTTGATCTTCCCGGCATATATAACATAA  
 Hxot TCTCCTCTTT - AAGTCAATGAAATTTGATCTTCCCGGCATATAAACATAA  
 Core TCTCCTCTTT - CAGTCAATGAAATTTGATCTCCCCCGGCATATAAACATAA  
 Apve TCTCCTCTTT - AAGTCAATGAAATTTGATCTTCCCGGCATTTAAACATAA  
 Lat j TCTCCTTTTT - AAGTCAATGAAATTTGATCTCCCCCGGCATAAAAAACATAA  
 Laja TCTCCTTTTT - CAGTCAATGAAATTTGATCTCTCCCGGCATACCAAACATAA

Syja TCTCCTTTTT - AAGTCAATGAAATTTGATCCCCCC TGCAGAAGCGGGCATAAGCA CATAA  
 Epme TCTCCTCTTC - AAGTCAATGAAATTTGATCTCCCC TGCAGAAGCGGACATAAACT CATAA  
 Grse TCTCCTTTTT - CAGTCAATGAAATTTGATCTCCCC TGCAGAAGCGGGCCTACACT CATAA  
 Clja TCTCCTCCCTC - CAGTCAATGAAATTTGATCTTCTCC TGAAGAAGCGAGAATTA AAA CATAA  
 Ogcy TCTCCTTTTT - TAATCAATGAAATTTGATCTTCCCC TGCAGAAGCGGGAATTA ACC CATAA  
 Plna TCTCCTTTTT - CAGTCAATGAAATTTGATCTTCCCC TGCAGAAGCGGGAATTCACA CATAA  
 Lema TCTCCTTTTT - CAGTCAATGAAATTTGATCTCCCC TGCAGAAGCGAGCATAAAAAC CATAA  
 Etzo TCTCCTCTTC - AAGTCAATGAAATTTGATCTCCCC TGCAGAAGCGGGCATAATAA CATAA  
 Apse TCTCCTTTTT - AAGTCAATGAAATTTGATCTCCCC TGCAGAAGCGGGCATATTTA CATAA  
 Epde TCTCCTTTTT - AAGTCAATGAAATTTGATCTCCCC TGCAGAAGCGGGCATATACA CATAA  
 Slja TCTCCTTTTT - AGTCAATGAAATTTGATCTCCCC TGCAGAAGCGGGCATATTA CATAA  
 Bsja TCTCCTCTTC - AAGTCAATGAAATTTGATCTCCCC TGCAGAAGCGGGCATAAAAAC CATAA  
 Ecna TCTCCTCACTC - TAGTCAATGAAATTTGATCTTCCCC TGCAGAAGCGGGAATAAATA CATAA  
 Cohi TCTCCTCCCTC - TTGTCATGAAATTTGATCTCCCC TGCAGAAGCGGGCATACTCT CATAA  
 Caar TCTCCTCTCTC - CAGTCAATGAAATTTGATCTCCCC TGCAGAAGCGGGCATATTTA CATAA  
 Came TCTCCTCTTC - CAGTCAATGAAATTTGATCTCCCC TGCAGAAGCGGGCATAAGTA CATAA  
 Mema TCTCCTCTTC - AAGTCAATGAAATTTGATCTCCCC TGCAGAAGCGGGCATAACAA CATAA  
 Lenu TCTCCCTCTT - AAGTCAATGAAATTTGATCTCCCC TGCAGAAGCGGGCATACAAA CATAA  
 Brja TCTCCTCCCTC - AAGTCAATGAAATTTGATCTCCCC TGCAGAAGCGGGCATGAGCC CATAA  
 Plma TCTCCTTCCTC - AAGTCAATGAAATTTGATCTCCCC TGCAGAAGCGGGCATACACC CATAA  
 Emst TCTCCTCTTC - AAGTCAATGAAATTTGATCTCCCC TGCAGAAGCGGGCATATAAC CATAA  
 Ptti TCTCCTCTTC - AAGTCAATGAAATTTGATCTCCCC TGCAGAAGCGGGCATACGCA CATAA  
 Losu TCTCCTCTTC - AAGTCAATGAAATTTGATCTCCCC TGCAGAAGCGGGCATACTAA CATAA  
 Geoy TCTCCTTTTT - CAGTCAATGAAATTTGAGCTCTCC TGCAGAAGCGGGCATCAAA CATAA  
 Dipi TCTCCTTTTT - AGTCAATGAAATTTGATCTCCCC TGCAGAAGCGGGCATACCCA CATAA  
 Pama TCTCCCTCCC - CAGTCAATGAAATTTGATCTCCCC TGCAGAAGCGGGCATAAATAC CATAA  
 Leob TCTCCTCTCTC - AAGTCAATGAAATTTGATCTCTCC TGCAGAAGCGGACATAACAC CATAA  
 Neba TCTCCTTTTT - CAGTCAATGAAATTTGATCTCCCC TGCAGAAGCGGGCATAAAACC CATAA  
 Pdpi TCTCCTTTTT - AAGTCAATGAAATTTGATCTCCCC TGCAGAAGCGGGCATAAATTA CATAA  
 Nimi TCTCCTTTTT - ATGTCATGAAATTTGATCTTCCCC TGCAGAAGCGGGAATCTCCO CATAA  
 Uptr TCTCCTTTTT - CAGTCAATGAAATTTGATCTCCCC TGCAGAAGCGGGCATAAAGTA CATAA  
 Pesc TCTCCCTCTC - TGGTCAATGAAATTTGATCTCCCC TGCAGAAGCGGGCATCCCCO CATAA  
 Baar TCTCCTTTTT - AAGTCAATGAAATTTGATCTCCCC TGCAGAAGCGGGCATATAAAA CATAA  
 Moar TCTCCTCTTC - AAGTCAATGAAATTTGATCTCCCC TGCAGAAGCGGGCATATAAA CATAA  
 Toja TCTCCTTTTT - AAGTCAATGAAATTTGATCTCCCC TGCAGAAGCGGGCATCCCCO CATAA  
 Chau TCTCCTTTTT - AAGTCAATGAAATTTGATCTTCCCC TGCAGAAGCGGGAATAACTA CATAA  
 Chse TCTCTCTTC - AAGCCATGAAATTTGATCTCCCC TGCAGAAGCGGGCATACACA CATAA  
 Enar TCTCCTTTTT - AGTCAATGAAATTTGATCTCCCC TGCAGAAGCGGGCATAAATA CATAA  
 Hpty TCTCCTTTTT - AAGTCAATGAAATTTGATCTCCCC TGCAGAAGCGGGCATACGCA CATAA  
 Nana TCTCCTTTTT - CAGTCAATGAAATTTGATCTCCCC TGCAGAAGCGGGCATAACCA CATAA  
 Mcst TCTCCTTTTT - AGTCAATGAAATTTGATCTTCCCC TGCAGAAGCGGGCATAAAAAC CATAA  
 Rhox TCTCCTTTCTC - AAGTCAATGAAATTTGATCTCCCC TGCAGAAGCGGGCATAAATAC CATAA  
 Opfa TCTCCTTTTT - AAGTCAATGAAATTTGATCTCCCC TGCAGAAGCGGGCATAAAAAC CATAA  
 Paar TCTCCTTTCC - AAGTCAATGAAATTTGATCTCCCC TGCAGAAGCGGGCATAAAAA TATAA  
 Gozo TCTCCTTTTT - AAGTCAATGAAATTTGATCTCCCC TGCAGAAGCGGGCATAAAAA CATAA  
 Ackr TCTCCTTTCCC - CAGTCAATGAAATTTGATCTCCCC TGCAGAAGCGGGCATCTTAC CATAA  
 Elev TCTCCTTTCT - AAGTCAATGAAATTTGATCTTCCCC TGCAGAAGCGGGAATAATAA CATAA  
 Trdu TCTCCTTTTT - CAGTCAATGAAATTTGATCTCCCC TGCAGAAGCGGGCATACTAA CATAA  
 Amoc TCTCCTTTTT - CAGTCAATGAAATTTGATCTTCCCC TGCAGAAGCGGGAATAATAC CATAA  
 Hame TCTCCTTTCTC - AAGCCATGAAATTTGATCTCCCC TGCAGAAGCGGGCATGAACC CATAA  
 Chso TCTCCTTTCC - AAGTCAATGAAATTTGATCTCCCC TGCAGAAGCGGGCATACACT CATAA  
 Lyto TCTCCTCTTC - CAGCCATGAAATTTGATCTTCCCC TGCAGAAGCGGGAATACAAA CATAA

|      |              |                |        |        |          |          |         |         |       |
|------|--------------|----------------|--------|--------|----------|----------|---------|---------|-------|
| Encr | TCTCCTCTCTC  | -CAGTCAATGAAAT | TGATCT | TCCCC  | TGCAGAAG | CGGGA    | ATACAAA | CATAA   |       |
| Bvar | TCTCCTTTTTC  | -AAGTCAATGAAAT | TGATCT | CCCCC  | TGCAGAAG | CGGGA    | ATGCCCC | CACAA   |       |
| Noco | TCTCCTCCCCT  | -AAGTTAATGAAAT | TGATCT | TTCCC  | TGCAGAAG | CGGGA    | ATAAACA | CATAA   |       |
| Chsp | TCTCCTCCCCC  | -CAGTCAATGAAAT | TGATCT | CCCCC  | TGCAGAAG | CGGGA    | ATAACCC | CATCA   |       |
| Arja | TCTCCTCTTTC  | -TAGTCAATGAAAT | TGATCT | TTCCC  | TGCAGAAG | CGGGA    | ATAAAAA | CATAA   |       |
| Pase | TCTCCTTTCCC  | -AAATCAGT      | GAAAT  | TGATCT | CTCCC    | TGCAGAAG | CGGGA   | ATAAAAA | CATAA |
| Trel | TCTCCTTATTC  | -CAGTCAATGAAAT | TGATCT | CCCCC  | TGCAGAAG | CGGGA    | GTAGAA  | AATAA   |       |
| Lifa | TCTCCTCTCCC  | -CAGTCAATGAAAT | TGATCT | GCCCC  | TGCAGAAG | CGGGA    | ATTGAAA | CATTA   |       |
| Acur | TCTCCTTTTTC  | -ATGTCAGT      | GAAAT  | TGATCT | CCCCC    | TGAAGAAG | CGGGA   | GTGTTAA | TATAA |
| Ampe | TCTCCTTTTCTC | -TAGTCAATGAAAT | TGATCT | CCCCC  | TGCAGAAG | CGGGA    | ATAGAAC | CATAA   |       |
| Urja | TCTCCTTTTTI  | -AAGTCAATGAAAT | TGATTT | TCCCC  | TGCAAAAG | CGGGA    | ATAAAAC | CATAA   |       |
| Enet | TCTCCTTTCCC  | -CAGTCCAT      | GAAAT  | TGATCT | TTCCC    | TGCAGAAG | CGGAA   | ATTCTAA | CATAA |
| Ptbr | TCTCCTTTTCTC | -CAGTCAATGAAAT | TGATTT | CCCCC  | TGCAGAAG | CGGGA    | ATAAAAC | CATAA   |       |
| Safa | TCTCCCCCTCC  | -CAGTCAAGT     | GAAAT  | TGATCT | TTCCC    | TGCAGAAG | CGGGA   | ATACACA | CATAA |
| Icae | TCTCCTTTTTC  | -AAGTCAAGT     | GAAAT  | TGATCT | CCCCC    | TGCAGAAG | CGGGA   | ATACACC | CATAA |
| Asmi | TCTCCCTTTTT  | -TAATCAGT      | GAAAT  | TGATCT | CCCCC    | TGCAGAAG | CGGGA   | ATAAAAT | CATAA |
| Foal | TCTCCACCCCT  | -TAGTCAAT      | TAAAT  | TGATCT | CCCCC    | TGCAGAAG | CTGGC   | ATACACA | CATTA |
| Drze | TCTCCTTTTCTC | -TAGTCAAGT     | GAAAT  | TGATCT | CCCCC    | TGCAGAAG | CGGGA   | ATATACA | TATAA |
| Rhas | TCTCCCTTTCC  | -CGTCAAT       | GAAAT  | TGATCT | CCCCC    | TGCAGAAG | CGGGA   | ATAAACT | CGTAA |
| Elac | TCTCCTTTTTC  | -CAGTCAATGAAAT | TGATCT | GCCCC  | TGCAGAAG | CGGGA    | ATAAATA | CATAA   |       |
| Kugu | TCTCCTTTTCTC | -AAGTCAATGAAAT | TAACT  | TCCCC  | TGCAGAAG | CGGGA    | ATAACAA | CATAA   |       |
| Plor | TCTCCTCTTTC  | -CAGTCAATGAAAT | TGATCT | CCCCC  | TGCAGAAG | CGGGA    | ATTCTCC | CATAA   |       |
| Sgun | TCTCCTCTTTC  | -AAGTCAATGAAAT | TGATCT | CCCCC  | TGCAGAAG | CGGGA    | ATAATCT | CGTAA   |       |
| Zaco | TCTCCTTTTTC  | -CAGTCAATGAAAT | TGATCC | CCCCC  | TGCAGAAG | CGGGA    | ATCCAAT | CATAA   |       |
| Zbfl | TCTCCTCTTTC  | -CAGTCAATGAAAT | TAACT  | TCCCC  | TGCAGAAG | CGGGA    | ATATACT | CATAA   |       |
| Spba | TCTCCTTTTTC  | -AGTCAATGAAAT  | TGATCT | CTCCC  | TGCAGAAG | CGGAC    | ATAACAC | CATAA   |       |
| Game | TCTCCTTTTTC  | -AAGTCAAGT     | GAAAT  | TGATCT | CCCCC    | TGCAGAAG | CGGGA   | ATATACC | CATAA |
| Thth | TCTCCTTTTTC  | -TAGTCAAGT     | GAAAT  | TGATCT | CCCCC    | TGCAGAAG | CGGGA   | ATGTAAC | CATAA |
| Xigl | TCTCCTCTTTC  | -CAGTCAATGAAAT | TGATCT | CCCCC  | TGCAGAAG | CGGGA    | ATATAAC | CATAA   |       |
| Hyja | TCTCCTTTTTC  | -AAGTCAATGAAAT | TGATCT | CCCCC  | TGCAGAAG | CGGGA    | ATAATCC | CATAA   |       |
| Psan | TCTCCTTTTTC  | -AAGTCAATGAAAT | TGATCT | CCCCC  | TGCAGAAG | CGGGA    | ATAATAC | CATAA   |       |
| Cupa | TCTCCTTTTTC  | -AAGTCAATGAAAT | TGATCT | CCCCC  | TGCAGAAG | CGGGA    | ATAAATC | CATAA   |       |
| Mpch | TCTCCTTTTTC  | -TAGTCAATGAAAT | TGATCT | CCCCC  | TGCAGAAG | CGGGA    | ATAAGAA | CATAA   |       |
| Char | TCTCCTTTTTC  | -AAGTCAATGAAAT | TGATCT | CCCCC  | TGCAGAAG | CGAGG    | ATGACAA | CATAA   |       |
| Pser | TCTCCTTTTTC  | -TAGTCAATGAAAT | TGATCC | CCCCC  | TGCAGAAG | CGGGA    | ATACAAA | CATAA   |       |
| Prol | TCTCCTTCCCC  | -CAGTCAATGAAAT | TGATCT | CCCCC  | TGCAGAAG | CGGGA    | ATAACCT | CATAA   |       |
| Plbi | TCTCCTTCCCC  | -CAGTCAATGAAAT | TGATCT | CCCCC  | TGCAGAAG | CGGGA    | ATAAAAT | CATAA   |       |
| Calu | TCTCCTCTCTC  | -CGTCAAGT      | GAAAT  | TGATCT | CCCCC    | TGCAGAAG | CGGGA   | ATTCAAG | CATAA |
| Papa | TCTCCCCCCCC  | -CAGTCAATGAAAT | TGATCT | TTCCC  | TGCAGAAG | CGGAA    | ATGATAA | CATAA   |       |
| Sufr | TCTCCTTTCCC  | -AAGTTAATGAAAT | TGATCC | CCCCC  | TGCAGAAG | CGGGA    | ATAAGGA | CATAA   |       |
| Stci | TCTCCTTTTCTC | -AAGTTAATGAAAT | TGACCT | CCCCC  | TGCAGAGG | CGGGA    | ATATTAC | CATAA   |       |
| Taru | TCTCCTTTTCTC | -AAGTCAATGAACT | TGATCT | CCCCC  | TGCAGAAG | CGGGA    | ATAAAAC | CATAA   |       |
| Rala | TCTCCTTTTTC  | -TAGTCAATGAAAC | TGATCT | CCCCC  | TGCAGAAG | CGGGA    | ATAACCC | CATAA   |       |

\*\*\*\*

\* \* \* \*

\*\*\* \* \*



|      | 42    | 43     | 44    | !       | HVR    | !                               |
|------|-------|--------|-------|---------|--------|---------------------------------|
| Scca | GACGA | GAAGAC | CCTAT | GGAGCTT | CAAATA | CATAAATTAAT-----TATGTACA        |
| Muma | GACGA | GAAGAC | CCTAT | GGAGCTT | TAAACA | CTTAAGTTAAT-----TATGT--A        |
| Erca | GACGA | GAAGAC | CCTGT | GGAGCTT | TAGACC | TAATCCAAAC-----ACT--ACAA        |
| Pose | GACGA | GAAGAC | CCTGT | GGAGCTT | TAGACT | AAATCCAAA-----TGACTACCA         |
| Actr | GACGA | GAAGAC | CCTAT | GGAGCTT | AAACA  | CAAGATCAA-----CTATGCTAT         |
| Scal | GACGA | GAAGAC | CCTAT | GGAGCTT | AAACA  | CAAGATCAA-----CTATGCTAT         |
| Posp | GACGA | GAAGAC | CCTAT | GGAGCTT | AAACA  | CAAGATCAA-----CTATGCTAT         |
| Atsp | GACGA | GAAGAC | CCTAT | GGAGCTT | AAACA  | CAAGACCAA-----CCACGCCAG         |
| Leoc | GACGA | GAAGAC | CCTAT | GGAGCTT | AAACA  | CAAGACCAACCAC----G-CCAGTAACCC-A |
| Amca | GACGA | GAAGAC | CCTAT | GGAGCTT | TAAACA | AAGAATCAA-----CCATGCATA         |
| Osbi | GACGA | GAAGAC | CCTGT | GGAGCTT | AAGATG | TTTATTTACTTGC-----GCTTAGT-AA    |
| Pabu | GACGA | GAAGAC | CCTAT | GGAGCTT | TAGACA | TAAGTCAAT-----CATGCCTA          |
| Hial | GACGA | GAAGAC | CCTAT | GGAGCTT | AAGATA | TATGACCAA-----CC-GCGCTTA        |
| Elha | GACGA | GAAGAC | CCTGT | GGAGCTT | TAGACC | TATGGCCAC-----CCATGCCGA         |
| Mlcy | GACGA | GAAGAC | CCTGT | GGAGCTT | TAGGCA | CAAGGCCAA-----CCACGCCAA         |
| Algl | GACGA | GAAGAC | CCTAT | GGAGCTT | TAGATA | TAAGATCAC-----ACGTACTTA         |
| Ptgi | GACGA | GAAGAC | CCTAT | GGAGCTT | TAGACA | AAAGGCCAAA-C-----ATGCCCA        |
| Alaf | GACGA | GAAGAC | CCTAT | GGAGCTT | TAGACA | AAAAGCCAA-----ACATGTTAA         |
| Nock | GACGA | GAAGAC | CCTAT | GGAGCTT | TAGACA | AAAAGCCAA-----TCATGTTTA         |
| Anja | GACGA | GAAGAC | CCTAT | GGAGCTT | TAGACA | AAAGATCAA-----ACATGTA-A         |
| Gyki | GACGA | GAAGAC | CCTAT | GGAGCTT | TAGGCA | AATGATCAT-----GTA-CACCAAA       |
| Syka | GACGA | GAAGAC | CCTAT | GGAGCTT | TAGGCC | AAAGTCAA-----CATGTACA           |
| Opma | GACGA | GAAGAC | CCTAT | GGAGCTT | TAGGCT | AAAGGCCA-----AACATGTAAA         |
| Comy | GACGA | GAAGAC | CCTAT | GGAGCTT | TAGGCA | CACATCAA-----T-ATGTAAA          |
| Sasp | GACGA | GAAGAC | CCTAT | GGAGCTT | TAGACA | AAACTAAAGCATTTTC-T-ATACTATGATAA |
| Eupe | GACGA | AAAGAC | CCTAT | GGAGCTT | TAGACA | AAGTCAACA-----TGCCTAAA          |
| Enja | GACGA | GAAGAC | CCTAT | GGAGCTT | TAGACA | CTAGCCAACCTG-----TGAATAA        |
| Same | GACGA | GAAGAC | CCTAT | GGAGCTT | TAGACA | CCAACCAAC-----CACGAAAA          |
| Chch | GACGA | GAAGAC | CCTAT | GGAGCTT | TAGACA | CAAGACCAAC-----CATGTTA--A       |
| Grgr | GACGA | GAAGAC | CCTTT | GGAGCTT | AAACA  | TAAGGCCA-----CCACGT---          |
| Caau | GACGA | GAAGAC | CCTTT | GGAGCTT | AAGGTA | CAAAACTCA-----ACCACGTAA         |
| Cyca | GACGA | GAAGAC | CCTTT | GGAGCTT | AAGGTA | CAAAACTCAACC-----ACGTAA         |
| Dare | GACGA | GAAGAC | CCTTT | GGAGCTT | AAGGTA | CAAGATTTA-----ATTTACATCAA       |
| Cost | GACGA | GAAGAC | CCTTT | GGAGCTT | AAGGTT | CAAGTCCACCC-----GCGTTAA         |
| Leec | GACGA | GAAGAC | CCTTT | GGAGCTT | AAGGTA | CAAACCCAC-----CTATGTTAA         |
| CrIa | GACGA | GAAGAC | CCTTT | GGAGCTT | AAGGTA | CAAACCCAA-----CCACGT---         |
| Clmc | GACGA | GAAGAC | CCTTT | GGAGCTT | TAGACA | TAAAGCCAA-----CTGTGTCAA         |
| Phin | GACGA | GAAGAC | CCTTT | GGAGCTT | TAGACA | AAAGGCCAAC-----TATTCC-C         |
| Icpu | GACGA | GAAGAC | CCTTT | GGAGCTT | TAGATA | CAAGATCAT-----CTATGT---         |
| Psto | GACGA | GAAGAC | CCTTT | GGAGCTT | TAGACT | TAAGATCAA-----CTATGT---         |
| Cora | GACGA | GAAGAC | CCTTT | GGAGCTT | TAGATT | AAAAATCAA-----CT-ATGTCAA        |
| Eisp | GACGA | GAAGAC | CCTTT | GGAGCTT | TAGACC | CCGACCACCT-----ATGTTAA          |
| Apal | GACGA | GAAGAC | CCTTT | GGAGCTT | TAGACT | TAAACCAACT-----GTGTAAC          |
| EsIu | GACGA | GAAGAC | CCTAT | GGAGCTT | TAGACA | CCCGGCAGA-----CCCTGT---         |
| Dape | GACGA | GAAGAC | CCTAT | GGAGCTT | TAGACA | CTAGGCAGAC-----CCTGTTAA         |
| Glse | GACGA | GAAGAC | CCTAT | GGAGCTT | TAGACA | AAAGGCAGA-----CCACGTTTA         |
| Naar | GTGGA | GAAGAC | CCTAT | GGAGCTT | TAGACA | AAAGGCAGA-----CT-ACGTTAA        |
| Baoc | GACGA | GAAGAC | CCTAT | GGAGCTT | TAGACA | AAAGGCAGA-----CTACGTTAA         |
| Opso | GACGA | GAAGAC | CCTAT | GGAGCTT | TAGATA | AAAGGTAGACC-----ACGTTTT         |
| Alte | GACGA | GAAGAC | CCTGT | GGAGCTT | TAGATA | TAAGGTCAA-----CCACGTCAA         |
| Plap | GACGA | GAAGAC | CCTGT | GGAGCTT | TAGACA | CAAGGTCAACC-----ACGTCAA         |

Plal **GACGA**GAAGAC**CCTATGGAGCTT****AGACA**CTAGACGGCCT-----ACGTAA  
 Sami **GACGA**GAAGAC**CCTATGGAGCTT****AGACA**CTAGACAGC-----CCACGTTAC  
 Rere **GACGA**GAAGAC**CCTATGGAGCTT****AGACA**CTAGACAACC-----CACGTCAA  
 Gama **GACGA**GAAGAC**CCTATGGAGCTT****AGACC**CTAGGAAGACC-----ATGTTAA  
 Onmy **GACGA**GAAGAC**CCTATGGAGCTT****AGACA**CCAGGCAGAT-----CACGTCAA  
 Sasa **GACGA**GAAGAC**CCTATGGAGCTT****AGACA**CCAGGCAGATCAC-----GTCAAGT-AA  
 Cola **GACGA**GAAGAC**CCTATGGAGCTT****AGACA**CCAGGCAGA-----TCACGTCAA  
 Dita **GACGA**GAAGAC**CCCATGGAGCTT****AGACA**CTGGGCAAC-----CCACCCCTG  
 Gogr **GACGA**GAAGAC**CCCATGAAGCTT****CAGACC**CCAGTCAACC-----CCTCCCC---  
 Chsl **GACGA**GAAGAC**CCTGTGAAGCTT****AGACA**CTAGAAAGCC-----CCACCAA  
 Atja **GACGA**GAAGAC**CCTGTGGAGCTT****AGATT**ATAAGTAGA-----CTATGTTAA  
 lido **GACGA**GAAGAC**CCTGTGGAGCTT****AAATT**ATAAGTAGA-----CTAT-GTTA  
 Auja **GACGA**GAAGAC**CCTATGGAGCTT****AGACA**TCAAACAGC-----CCACGTAAA  
 Chag **GACGA**GAAGAC**CCTGTGGAGCTT****AGACA**CTTAAGCGACC-----CAAATAGA  
 Hami **GACGA**GAAGAC**CCTATGGAGCTT****AGACA**TCAAGCAGCC-----TACAG-CA  
 Saun **GACGA**GAAGAC**CCTATGGAGCTT****AGACA**TCAAGCAGC-----CCACAAA-A  
 Nema **GACGA**GAAGAC**CCTATGGAGCTT****AGACA**CAAGGCGGCC-----ACGTCAA  
 Disp **GACGA**GAAGAC**CCTATGGAGCTT****AGACA**TAAAGCGAC-----CCACGT---  
 Myaf **GACGA**GAAGAC**CCTATGGAGCTT****AGACA**TAAAGCAAC-----CCATGTTAA  
 Lagu **GACGA**GAAGAC**CCTGTGGAGCTT****AGGCC**CAAGAAAGAGGACA-----  
 Trtr **GACGA**GAAGAC**CCTATGGAGCTT****GAGACT**TTGGAAAGCC-----TGCCTT-A  
 Zucr **GACGA**GAAGAC**CCTGTGGAGCTT****AGACT**TTAGTGAGC-----TT-GCCCAA  
 Pxja **GACGA**GAAGAC**CCTATGGAGCTT****GAAACC**TATGATAGTA-----CACGTC-A  
 Pxlo **GACGA**GAAGAC**CCTATGGAGCTT****GAAACC**TATGATAGTGC-----ACGTCAA  
 Pctr **GACGA**GAAGAC**CCTATGGAGCTT****AGACC**TCCCCGAC-----CCATGTGAC  
 Apsa **GACGA**GAAGAC**CCTATGGAGCTT****AGACA**CCCCCTAAC-----CTATGC-GA  
 Cabe **GACGA**GAAGAC**CCTGTGGAGCTT****GAAACA**ATTGGGGATT-----CAGATC-A  
 Bzze **GACGA**GAAGAC**CCTATGGAGCTT****AGACA**CAAAGCAGAC-----CATGTT-A  
 Siim **GACGA**GAAGAC**CCTATGGAGCTT****AGACA**CTAAGGAAGCC-----CA-GTCAA  
 Ctru **GACGA**GAAGAC**CCTATGGAGCTT****AGATA**CTAAGACAG-----ATCATGTTAA  
 Dpbr **GACGA**GAAGAC**CCTATGGAGCTT****AGATA**CTAAGATAGA-----T-CATGT-TA  
 Caki **GACGA**GAAGAC**CCTGTGGAGCTT****AGACT**TAAAATAACC-----CTAT---  
 Phja **GACGA**GAAGAC**CCTGTGGAGCTT****AGACC**TAAAATAAA-----TCACAT---  
 Brsp **GACGA**GAAGAC**CCTTTGGAGCTT****CAGACC**CTAATAAG-----TTATGTT-T  
 Gamo **GACGA**GAAGAC**CCTATGGAGCTT****AGACC**TAAAGTAAG-----TCACGTTTA  
 Lolo **GACGA**GAAGAC**CCTGTGGAGCTT****AGACC**TAAGGTAAAGTC-----ACGTTTA  
 Batr **GACGA**AAAGAC**CCCGTGGAGCTT****AGGAC**GCCTCAGAAAC-----  
 Prmy **GACGA**GAAGAC**CCTGTGGAGCTT****CAAGTA**AACTAAGAG-----T--  
 Loli **GACGA**GAAGAC**CCTATGGAGCTT****AGACA**CTAAGGCAGC-----TTACGTT-A  
 Loam **GACGA**GAAGAC**CCTATGGAGCTT****AGACA**CCAAGGCAGATC-----ACGTTAA  
 Chab **GACGA**GAAGAC**CCTGTGGAGCTT****AGACA**CTCGGGCAG-----ACTATGTCAA  
 Chto **GACGA**GAAGAC**CCTGTGGAGCTT****AGACA**CTCGGGCAG-----ACTATGT---  
 Majo **GACGA**GAAGAC**CCTGTGGAGCTT****AAACA**CCAGGTGAG-----CCCATGT---  
 Hlst **GACGA**GAAGAC**CCTGTGGAGCTT****AAACA**AGTAGCGGG-----CCAT-GTCA  
 Clpe **TACGA**GAAGAC**CCTATGGAGCTT****AGACC**CAAGTGCAG-----TCCTGTTTT  
 Mlmr **GACGA**GAAGAC**CCTATGGAGCTT****AGACA**CTAGAACAG-----ACT-ATATACA  
 Crcr **GACGA**GAAGAC**CCTGCGGAGCTT****AGACC**CCAGAACAG-----ATCACGTCA-  
 Muce **GACGA**GAAGAC**CCTGCGGAGCTT****AGACC**CCAGAACAG-ATC-----ACGTCAA  
 Bege **GACGA**GAAGAC**CCTGTGGAGCTT****AGACA**ACAGGGCAG-----ACCATGTCAA  
 Mela **GACGA**GAAGAC**CCTGTGGAGCTT****AGACC**AGAGCAGCTC-----ACTTTCA  
 Hats **GACGA**GAAGAC**CCTGTGGAGCTT****AGACA**AAAGAACAG-AC-----CATGTCAA  
 Orla **GACGA**GAAGAC**CCTGTGGAGCTT****AGACC**ATAAATAGA-----CC-ATGTCAA

Cosa GACGA GAAGAC CCTAT GAGCTT AGACC AAGGGCAGA-----CCATGTTAA  
 Exsp GACGA GAAGAC CCTT TGGAGCTT TAGACT ACAGGCAGA-----CCATGCTTA  
 Depa GACGA GAAGAC CCTGT GGGAGCTT TAGATA ATATGATGG-AC----C-----ATGTTAA  
 Rima GACGA AAAGAC CCTGT GGGAGCTT TAGATT ACAGAGCAG-----  
 Fuol GACGA GAAGAC CCTAT GGGAGCTT CAGACA CAAGGGCAT-----ATCATGT---  
 Gmaf GACGA GAAGAC CCTAT GGGAGCTT TAGACC CACTAGCAG-----ATCATAA---  
 Xeei GACGA GAAGAC CCTAT GGGAGCTT TAGACA CAAGGACAG-----ATCATGTTAA  
 Pros GACGA GAAGAC CCTAT GGGAGCTT TAGACA CAAAGTAGC-----CCAAAC---  
 Scmi GACGA GAAGAC CCTAT GAAAGCTT TAGACC CAAAGCGAA-----CCAAACCAC  
 Rolo GACGA GAAGAC CCTAT GGGAGCTT CAGACA CAAAGCAGT-----CCACTC---  
 Cere GACGA GAAGAC CCTAT GGGAGCTT TAGACA AAATAGTAG-TC-----CATATA-A  
 Daga GACGA GAAGAC CCTGT GGGAGCTT TAGACA TGAGCAGAG-----C-AAGCTGA  
 Anco GACGA GAAGAC CCTAT GGGAGCTT CAGACA CAAAGCAGC-----CCACGTTAA  
 Dmve GACGA GAAGAC CCTAT GGGAGCTT TAGACC CAAGGCAGC-----CCACGTC-A  
 Dmar GACGA GAAGAC CCTAT GGGAGCTT CAGACA TAGGGCAGC-----TCAC-GTCA  
 Anka GACGA GAAGAC CCTAT GGGAGCTT CAGACA CAAGGCAGC-----TCATGTTAA  
 Moja GACGA GAAGAC CCTAT GGGAGCTT CAGACA CAAAGCAGC-----C-CACGT--T  
 Hoja GACGA GAAGAC CCTAT GGGAGCTT CAGACA CAAGGCAGC-----C-CACGT-TA  
 Bede GACGA GAAGAC CCTAT GGGAGCTT TAGACA CAAAGCAGTC----C-----AGATTAA  
 Bsp GACGA GAAGAC CCTAT GGGAGCTT TAGACA CAAAGCAGC-----CCA-AATTA  
 Mysp GACGA GAAGAC CCTGT GGGAGCTT TAGACA AAAGACCGA-----CCTTGCAAA  
 Osja GACGA GAAGAC CCTGT GGGAGCTT TAGACA TAAAGCGGAC-----C-----ACATAAA  
 Sgro GACGA GAAGAC CCTGT GGGAGCTT TAGACA CAAGACAGA-----CCATAAAGA  
 Pzpa GACGA GAAGAC CCTGT GGGAGCTT TAGACC TAGTGCAGC-----CCACAA--A  
 Zeja GACGA GAAGAC CCTAT GGGAGCTT TAGACC TAGTGCAGC-----CCACGAAAA  
 Zne GACGA GAAGAC CCTAT GGGAGCTT TAGACC TAGTGAAGA-----CCA--CGAA  
 Zefa GACGA GAAGAC CCTAT GGGAGCTT TAGACC TAATGCAGT-----CCACGAATA  
 Acni GACGA GAAGAC CCTAT GGGAGCTT TAGACC TAGTGCAGA-----CCACGAAAA  
 Ncrh GACGA GAAGAC CCTAT GGGAGCTT TAGACC TAGTGCAGA-----TCACGA---  
 Agca GACGA GAAGAC CCTAT GGGAGCTT TAGACA CAAGGTAAG-----TTATGTTAA  
 Hydy GACGA GAAGAC CCTAT GGGAGCTT TAGACA CTAGAGTAG-----ACCATGTTAA  
 Gsac GACGA GAAGAC CCTAT GGGAGCTT TAGACA CTAAGTGG-----ATCATGTCAA  
 Pevo GACGA GAAGAC CCTAT GGGAGCTT TAGACT ACCAAGCAG-----ATTAAGT---  
 Hiku GACGA GAAGAC CCTGT GGGAGCTT CAGACA ATAGATGAA-T-----T-TATTA---  
 Inpa GACGA GAAGAC CCCGT GGGAGCTT TAGACA TAAAGCAAC-----T-TGT-AA  
 Auch GACGA GAAGAC CCTAT GGGAGCTT TAGACA CCCAACAGAC-----C-----AAGTAAA  
 Fico GACGA GAAGAC CCTAT GGGAGCTT TAGACA TAAGACAGC-----CTATGTTAA  
 Macs GACGA GAAGAC CCTAT GGGAGCTT TAGATA TCAAAGCAG-CT-----CGTGTAA  
 Moal GACGA GAAGAC CCTGT GGGAGCTT TAGACC CTAAGCAG-----CCCACGAACT  
 Syma GACGA GAAGAC CCTGT GGGAGCTT TAGGCA CTAAGTAA-----TGT-AC  
 Maf r GACGA GAAGAC CCTGT GGGAGCTT TAGACA CAAAGCAGA-----TC-TGGCAA  
 Dcpe GACGA GAAGAC CCTGT GGGAGCTT TAGACA CAAGACAAA-----ATCACGT---  
 Dct i GACGA GAAGAC CCTGT GGGAGCTT TAGACA TAAGACAAA-----ATCACGT---  
 Hehi GACGA GAAGAC CCTAT GGGAGCTT TAGACA CCAAGAAG-ATC-----CTGTCAA  
 Stam GACGA GAAGAC CCTAT GGGAGCTT TAGACA CCAAGGAG-A-----TCATGTTTA  
 Hogi GACGA GAAGAC CCTAT GGGAGCTT TAGACC ACAAGTCGG-----GTCATGTCAA  
 Erzo GACGA GAAGAC CCTAT GGGAGCTT TAGACA CCAAGCAG-----ATCACGTTAA  
 Hxot GACGA GAAGAC CCTAT GGGAGCTT TAGACA CCAAGGCGG-----CCCACGTTAA  
 Core GACGA GAAGAC CCTAT GGGAGCTT TAGACA CGAAGCAG-----CCCACGT---  
 Apve GACGA GAAGAC CCTAT GGGAGCTT TAGACA CCAAGGCAG-C-----TTACGTT-A  
 Lat j GACGA GAAGAC CCTAT GGGAGCTT TAGACA CCAGGATAG-CT-----CATGTTAA  
 Laja GACGA GAAGAC CCTAT GGGAGCTT TAGACC CCAGGACAG-----ACCATGT---

Syja GACGA GAAGAC CCTGT GAGCTT TAGACA CTAAGCAG-----ATCAAGTTAA  
 Epme GACGA GAAGAC CCTAT GAGCTT TAGACA CTAAGCAG-GC-----CA-GTATT  
 Grse GACGA GAAGAC CCTAT GAGCTT CAGACA CCAAGCAG-----ACCATAT-AC  
 Clja GACGA GAAGAC CCTAT GAGCTT TAAACA CTCGAACAA-----TTATGT---  
 Ogcy GACGA GAAGAC CCTGT GAGCTT TAGGCA ACAGAAAGG-----ATCTTGT---  
 Plna GACGA GAAGAC CCTAT GAAGCTT TAGACA CCAGAACAG-----CCCAGATCAA  
 Lema GACGA GAAGAC CCTAT GAGCTT TAGACC CCAGAATAA-----ATCATGTCAA  
 Etzo GACGA GAAGAC CCTAT GAAGCTT TAGATA TAAGACAGA-----TCACGT---  
 Apse GACGA GAAGAC CCTAT GAGCTT TAGACA CCAAGCGG-----ACCATGT---  
 Epde GACGA GAAGAC CCTAT GAGCTT TAGACA CCAAGACAG-A-----TCATGTT-A  
 Slja GACGA GAAGAC CCTAT GAGCTT TAGACA CTAAGGCAG-A-----C-CACGT--T  
 Bsja GACGA GAAGAC CCTAT GAGCTT TAGACA CCAAGCGG-----CCCACAGTTA  
 Ecna GACGA GAAGAC CCTAT GAGCTT TAGATA CTAGAATAG-AC-----CATGTTAA  
 Cohi GACGA GAAGAC CCTAT GAGCTT TAGATA CTAAGGTAG-----ACCATATTCC  
 Caar GACGA GAAGAC CCTAT GAGCTT TAGACA CCAAGACAG-C-----C-CATGT-TA  
 Came GACGA GAAGAC CCTAT GAGCTT TAGACA CCAAGACAG-A-----TCATGTT-A  
 Mema GACGA GAAGAC CCTAT GAGCTT TAGACA CCCAGGACAG-CC-----CATGTTTA  
 Lenu GACGA GAAGAC CCTAT GAGCTT TAGACA CCAGAACAG-A-----C-CACGT-TA  
 Brja GACGA GAAGAC CCTAT GAGCTT TAGACA TACGGTATA-----TCCCGTTAA  
 Plma GACGA GAAGAC CCTAT GAGCTT TAGACA CCAAGGCAT-G-----TCATGTT-A  
 Emst GACGA GAAGAC CCTAT GAGCTT TAGACA CCAAGCAG-----ATCAT-GTTA  
 Ptti GACGA GAAGAC CCTAT GAGCTT TAGACA CCAAGCAG-----ACCA-TGTTA  
 Losu GACGA GAAGAC CCTAT GAGCTT TAGATA TTAAGCAGA-----CTGTGTTAA  
 Geoy GACGA GAAGAC CCTAT GAGCTT TAGACT CAATGGGCAG-ACT-----ATGTTAA  
 Dipi GACGA GAAGAC CCTAT GAGCTT TAGACA CCAAGACAG-ACC-----ATGTTAA  
 Pama GACGA GAAGAC CCTAT GAGCTT TAGACC TCAGAGCAG-CC-----CATGTA-A  
 Leob GACGA GAAGAC CCTAT GAGCTT TAGACA CCAAGGTAG-A-----TTTATGTTTA  
 Neba GACGA GAAGAC CCTGT GAGCTT TAGATA CTAAGATTG-----ATC-CTCTTA  
 Pdpi GACGA GAAGAC CCTGT GAGCTT TAGACC CAAGACAGA-----CTATGT---  
 Nimi GACGA GAAGAC CCTAT GAGCTT TAGACA CCTAGACAG-----ACCACGT-CA  
 Uptr GACGA GAAGAC CCTGT GAGCTT TAGACA CTAGGACAG-----ACCATGT---  
 Pesc GACGA GAAGAC CCTGT GAGCTT TAGACA CTAATAATAG-----ACC-ATGTCCC  
 Baar GACGA GAAGAC CCTAT GGAAGCTT TAGGCA CTAAGACAG-----ACCATGTTAC  
 Moar GACGA GAAGAC CCTAT GAGCTT TAGACA CCAAGGTAG-----ATCATGTTAA  
 Toja GACGA GAAGAC CCTAT GAGCTT TAGATG ATGAAACAG-----ACCACGTCAA  
 Chau GACGA GAAGAC CCTAT GAGCTT TAGACA AAAGCAGGC-----CATGT-TA  
 Chse GACGA GAAGAC CCTGT GAGCTT TAGACA CCAAGGCAG-----ATTATGTTAA  
 Enar GACGA GAAGAC CCTAT GAGCTT TAGACA CCAAGGCAG-----TTTATGTTAA  
 Hpty GACGA GAAGAC CCTAT GAGCTT TAGACA CTAAGACAG-----ACC-ATGTTAA  
 Nana GACGA GAAGAC CCTAT GAGCTT TAGACA CCAA-ACAG-----ATTTTGTAAA  
 Mcst GACGA GAAGAC CCTAT GAGCTT TAGACA CCAAGACAG-----CTCAAAGTTA  
 Rhox GACGA GAAGAC CCTAT GAGCTT TAGACA CAAGGCAGA-----TCATGTTAA  
 Opfa GACGA GAAGAC CCTAT GAGCTT TAGACA CCAAGGCAG-AT-----CATGTT-A  
 Paar GACGA GAAGAC CCTAT GAGCTT TAGACA CCAACGCAG--ATC-----ACGCTAC  
 Gozo GACGA GAAGAC CCTAT GAGCTT TAGACA CCAGAATAG-AC-----CATGT-TA  
 Ackr GACGA GAAGAC CCTAT GAGCTT TAGACA CTAAGCAG-----GTCACGT---  
 Elev GACGA GAAGAC CCTAT GAGCTT TAGACA TAAGCAGACC-----TTGTTAA  
 Trdu GACGA GAAGAC CCTAT GAGCTT TAGACC CCAGAACAG-----ACCATGT---  
 Amoc GACGA GAAGAC CCTGT GAGCTT CAGACA CTAATCAG-CC-----CTTGTCCA  
 Hame GACGA GAAGAC CCTAT GAGCTT TAGACA CCAAGCAG-----CTTACGTCAA  
 Chso GACGA GAAGAC CCTAT GAGCTT TAGACA CTAATAACAG-----CTCATGTTAA  
 Lyto GACGA GAAGAC CCTAT GAAGCTT TAGACA CCAAGGCAG-ATC-----ATGTTAA

Encr GACGA GAAGAC CCTAT GGAGCTT TAGACA CCAAGACAG-----ATCA-TGTTA  
 Bvar GACGA GAAGAC CCTAT GAAGCTT TAGACA CAAGGCAGC-----CCCCGTAA  
 Noco GACGA GAAGAC CCTAT GAAGCTT TAGACC TAAGGTAGA-----CCAGACTAC  
 Chsp GACGA GAAGAC CCTGT GGAGCTT TAGATA CTAGAAAGA-----CCATTT---  
 Arja GACGA GAAGAC CCTAT GGAGCTT TAGACA CCAAGACAG-----CTCATGTAA  
 Pase GACGA GAAGAC CCTAT GGAGCTT TAGACA CTAAGATAG-CC-----CCCCTC-C  
 Trel GACGA GAAGAC CCTAT GGAGCTT TAGACA ACAGAATAG-A-----C-CAT-----  
 Lifa GACGA GAAGAC CCTAT GGAGCTT TAGACA CAAAATAGCTC-----GTACCAC  
 Acur GACGA GAAGAC CCTAT GGAGCTT CAGGCA CTAAGACAG-CT-----CATGTCCC  
 Ampe GACGA GAAGAC CCTAT GGAGCTT TAGACC CCAAGACAG-----ACC-ATGTAA  
 Urja GACGA GAAGAC CCTGT GGAGCTT TAGACA CTAAGCAGCCC-----ATGTTAC  
 Enet GACGA GAAGAC CCTGT GGAGCTT CAGACA CCAAGGCAG-----CCCCCCC--  
 Ptbr GACGA GAAGAC CCTGT GGAGCTT TAGACA AAAAATAAAT-----TTGTAA  
 Safa GACGA GAAGAC CCTGT GGAGCTT TAGACA GCAGACTGC-C-----C-TTACA-CA  
 Icae GACGA GAAGAC CCTAT GGAGCTT TAGACA CCAAGGCAT-----ATC-ATGTAA  
 Asmi GACAA AAAGAC CCTGT GGAGCTT AAACA CAAGAGAGG-AAT-----ACCCCCAACTC  
 Foal GACGA GAAGAC CCTAT GGAGCTT TAGCCA AATTAGGCTT-----AAGTTA-CTG  
 Drze GACGA GAAGAC CCTGT GGAGCTT TAGATG TAAAAGTAG-----ACTAAATTAAT  
 Rhas GACGA GAAGAC CCTAT GGAGCTT TAGACA CCAGGACAG-----ACCATGT---  
 Elac GACGA GAAGAC CCTAT GGAGCTT TAGACA CCAGAACAG-----ACCGCACTGA  
 Kugu GACGA GAAGAC CCTAT GGAGCTT TAGACA AAACACAGA-----CTGCATCAA  
 Plor GACGA GAAGAC CCTAT GGAGCTT TAGACA CCAAGGCAG-----ACCATGTAA  
 Sgun GACGA GAAGAC CCTAT GGAGCTT TAGACA CCAAGCAGATC-----ATGTAA  
 Zaco GACGA GAAGAC CCTAT GGAGCTT TAGATA CTAAGACAGATC-----ACGTCAC  
 Zbfl GACGA GAAGAC CCTAT GGAGCTT TAGACA CTAAGACGA-----ATCATGT---  
 Spba GACGA GAAGAC CCTGT GGAGCTT TAGGTA ACAAACAGATC-----GTGCCCA  
 Game GACGA GAAGAC CCTAT GGAGCTT TAGACA CCAAGGCATAT-----CATGTAA  
 Thth GACGA GAAGAC CCTAT GGAGCTT TAGACA CCAAGGCATATC-----ATGTCAA  
 Xigl GACGA GAAGAC CCTAT GGAGCTT TAGACC TCAAAGCAGA-----TCATGTT-A  
 Hyja GACGA GAAGAC CCTAT GGAGCTT TAGACA CCAAGGCAT-----ATCATGTTAC  
 Psan GACGA GAAGAC CCTAT GGAGCTT TAGACA CTAAGGCAT-----ATCAT-GTAA  
 Cupa GACGA GAAGAC CCTAT GGAGCTT TAGACA CCAAAGTAT-----ATCATGC---  
 Mpch GACGA GAAGAC CCTAT GGAGCTT TAGACA CCAAACAG-----ATCTTGTTAA  
 Char GACGA GAAGAC CCTAT GGAGCTT TAGACA CCAGAGTAG-----CCCTGTCAA  
 Pser GACGA GAAGAC CCTGT GGAGCTT TAGACC CCAGAGCAG-----ACCATGTAA  
 Prol GACGA GAAGAC CCTAT GGAGCTT TAGACC CAAGGCAG-----ATC-ATGTCAA  
 Plbi GACGA GAAGAC CCTAT GGAGCTT TAGACA CACAGGTG-----ACCATGT---  
 Calu GACGA GAAGAC CCTGT GGAGCTT TAGACA ACCGGGTAG-----CCCATGTCAA  
 Papa GACGA GAAGAC CCTGT GGAGCTT TAGACA GTTAACCGC-----CCAT-AACA  
 Sufr GACGA GAAGAC CCTAT GGAGCTT TAGGCA ACAAGCAGA-----CCGTACCA-  
 Stci GACGA GAAGAC CCTAT GGAGCTT TAGGTC TAAAACTG-----CTCAT-GT-A  
 Taru GACGA GAAGAC CCTAT GGAGCTT TAGACA AAAAACAGC-----CCCTGTCA-  
 Rala GACGA GAAGAC CCTAT GGAGCTT TAGACA CTAAGTAG-A-----T-CATGT-TA

\* \* \* \* \* \* \* \* \* \* \* \* \* \* \* \*

|      | HVR                                                             |
|------|-----------------------------------------------------------------|
| Scca | TA---TTAATAAT-----CCCAGGACATAAACAAAAAAT-A-----TAATAC--TTCT      |
| Muma | ACCATTTATTCTC-----AGGGTATAAACAAAATATAT-----AATACTTCT--          |
| Erca | A---CCCTATAAAAAATATAG-----GTAAAC-----CCTATGTTA-----             |
| Pose | ACTA-----TATTTT--A-----CCATATAGA-----TAAACA-CAGC-ATT-AT---      |
| Actr | CAAGCCAAC-----TACCCACGGAAATAATA-----GCTAAAAGCATAATAGTACCCT      |
| Scal | CAAGCCAACCACCTA-----CGGAAATAAC---AGCTAAAAGCACA--ATAGTA--CTAT    |
| Posp | CAAGCCAACACACCAA--CAGG-AAT-----AACAGCTATAAGCATAATAGTACCTCT---   |
| Atsp | CAACCCAACGTGTTTCGAAAGAC-----ATAAAAAATATAAAG---CACAGTGATCCCT---- |
| Leoc | ATTGCTCGAAAGAC-----ATAAAAAATACAAAGCACAGTG---GTCTCT              |
| Amca | CAAGTTTATCCCCCAA--CATG-AAATAACAACCTCAAGCA-CAT-----TGGCCTTC---   |
| Osbi | -----AATT--AT-CAACT---AATTTTAAAGCC-----TAG----C-AACCCTA         |
| Pabu | AACACTAT-AA-----ATAAATAACA-----AAGCAT-AA--TGA--CACT             |
| Hial | -GTAACCCATAACCCAAAAGGAAACAAAAG-----GCA---AAAGCGTAGCGGAAC--AT    |
| Elha | GC-----AGCCCCAC---AACAAA---AAAGCGAACAAGCCTAATGGTACC-----T       |
| Mlcy | -GCACCACCCAA-----AAGACACAA---GCAC--AAC-AGCCA--CTG               |
| Algl | ATAGCTAAT-----GCCCGACAGGAATAAAA---G-CTAGTTTATAATGCGTTGGTT       |
| Ptgi | GCAACCCCACTAAACAAAAGAAATAAAAGGAAAA---CTAAGCCTAATGAAATGAT---     |
| Alaf | ACGACCTATAAACCAATTTG-GGATAAAAAG--TACCTAAACCATATGCCA-----TCT     |
| Nock | A--CAACTAATAAACCGACCGGATTA AAAAGTA ACTAAGCTCTG-TGATATA-----AT   |
| Anja | AGAAACCAAGTTAACCAAAAAGGAACACAAAGGCCACGAA-----ACCCGACGTAAACT---  |
| Gyki | -CCCTCTCTTCA-----TTCAAAGCCTG-----GGGAAACATAACGCTAAT----         |
| Syka | AGGACCCGAAGCATTG--ATAAATAATAAAAGGCCTAACCTA---ACCAAATGTAAAAT     |
| Opma | GAAATTTACATTTAAA-----CAAAGGAACAAAGCAAATTT-AACTCAATG--TATTAA     |
| Comy | A-AACCAAATCTTCCA--ATA-GGCCTAAAAAATGA-----GAAAAACAAGTATTAA---    |
| Sasp | ACCG--CTAGG---AATACAA-----ATGGACTCAATTGTGTCAA---                |
| Eupe | AA-----ACCCCAAATG-ACCCAACAGAAC-AAAATGTTTATTAACCCAACATGTCA       |
| Enja | GCGAC-TGAAGTGAAGCAAGTC-----CTAAATA-CCCGCAGCCTT---AT             |
| Same | G-CGGCCCTAA-----TTGGAGCCCCAAC-----AAC-GTGATTCT                  |
| Chch | ACCACTTAAAACAA-----ACAAGTGGAACAG-----AGTGGTAAACCTT---           |
| Grgr | -----TAAACAACCTC-----C---CCAAGGATAAG-----AACGGTATGGCAAGCA--CT   |
| Caau | GCAA-----CTCAA--T-----AAAAATGAAAACCTTTGTGGAATA---               |
| Cyca | GCAA--CTCAA-TAAAAAGC-----AAAAACCTTGTG-GACC-A---                 |
| Dare | -GCAAACC-AAT-----AAAAGTGATT---AACTAGTAAAAG-----A                |
| Cost | ACAACCTACTAAATA-----AGA-AT-----TAAA-CCTAGCAGAAAA-----           |
| Leec | ACAACCTA-----TTAA---CAAAGTATAA---ACCTAGTAGAGA-----A             |
| CrIa | -----CAAGCAACC-----ACATAAATGGCATAAAAT--TAGTGAGTA--              |
| Clmc | AA-ACCCA-----AATCAAAAAGAAGCTAA---ACAAAACAGCAA-----AA            |
| Phin | AACCCCTACA-----TTAATA-----GGACAAA-----CGAAATACCAC---            |
| Icpu | -----CAAGGACTT-----AGTCAAACCTAAA-TAGCAC--                       |
| Psto | -----CAAG-AAT-----C AAAAATAAAA---TTAAACTAAATAGCAA--             |
| Cora | AT-----ATTTATC-----A--A--ATAAA---ACTAAAT--AGTAA-----            |
| Eisp | TAAA---CCAGATTAATAA-----GA-----TTAAACTAAATA-GCTT-A---           |
| Apal | AGACTAATTACCTTTA--GT----CA--AACTAAACCT-----TGC-A---             |
| EsLu | -----TAAATAACT-----GAACTATCAGATTA AAAACA--AAGCGGCC--CT          |
| Dape | GTAACCCCTATA-----TTAACGGGTAAA-ACAA-AGC-GGCC--CT                 |
| Glse | -----ACCCACCTCTT-----CT---ATAGGACTAAA---CACAGTGCCC----CCT       |
| Naar | -AACCCCTCAT-----CACAGGACT-----AAACACAGTACCC-CC--T               |
| Baoc | -----AACTCCTA---A---ACCACCAG-GAAAAACACAGT-----AGCCCT            |
| Opso | AAACC-CTAA--ATCACAGGA-----CTAAACACATTGGCCCCT---                 |
| Alte | C-----AACCAAACCTC---A---AAGGTATAA---ACAAAGTGTGAACAT-----        |
| Plap | ACAA---CCAAACTCAAAGGC-----ACAAACAAAGTGAAGCAT---                 |

Plal GCTC--CCTACTCTAA-----TGGG-----AAAAGCATTATAGCCCC---  
 Sami ---ACCCCCTCCATTA-----AG-A-GGGGAAAACATTGTG-----GCTCC---T  
 Rere -ACACC-----CTTAGTCT-----GCTAGGAGA---GAACATTGTGGCCCT--T  
 Gama A---C-----AACCCCTTGTGCGGGA-----GAGAACTTAGTGGCAC-CT---  
 Onmy GCAACCTT-----GAA-----TTAACAAGTAAAAACGC-AGTAGACCCC--T  
 Sasa -----CC-----TTGAAT-TAACA---AGT--AAAAACG---CAGT-GACC----CCT  
 Cola GC-----AACCTTGA---G---TTAACAAG---TAAAAACGCAGTGACCCCT-----  
 Dita ACCC-----CCTCG--G-----CCTACTGACGGGGACAATAACTGGCCTT---T  
 Gogr -----TAACCTCTTC-----TACCAAAAA-----GGGGGCTATAGGGA-GAGACCC--CC  
 Chsl ---CTACC-TATCTACCAGC-----GTAAATCCTAGGGCCC-TT---  
 Atja TAAA-----ACAAA--A-----CAAAGTAATACAAACCAAGTAGATACT---  
 lido A-TAC-GCC-----AAAATAAAGGACACTAA---ACCAAGTAG-A-----CAC  
 Auja A-----CAATCA---CCAT---AAAGAGAACT---AACACAGTGAACCCTC-----  
 Chag GCAAACCTCACC-----ACAAATGAGCTGACTCCCGATGGTAAGACA  
 Hami AGCAACCCCAT-----AAACGGCTAC-AAACAA-CGTTAA-CC--C  
 Saun AACAAACCCAT-----ACCA-----GTGGCCATAGAACAAC-----GTGGAATCC---  
 Nema GTAC--CCTAATTTAA-AAC-----A-----ATAAACAAAGTGTACACC---  
 Disp -----CAAAAACC-----CCCTAA-AAGGAAATGAACAAAA--TGAGCT--T  
 Myaf AT-----ACCCCAA---TA-AAGGAACAAAACAAGATGGTCAT-----  
 Lagu -----AGAGGACA-----TCAAGCCAGAAAC--AGCC---ACAGCCTAT--C  
 Trtr AGTAAATTGAT-----ATTACCTATTTAAACCCCGG-CATCCCT---  
 Zucr -GTATAAACCCC-----AACTATATAA-----AACACGGCTACCCT----  
 Pxja AACACCTCAAC-----ATAAAGAAA-----AGAACTAAGTGTTTATC---  
 Pxlo ACACC-TCAG--CACAAAGAA-----AAGAACTAAGTGTTTACC---  
 Pctr ACACTCAA----CAAA--GGCA-GAA----CTTAATGG-----ACC-C---  
 Apsa A-GATTCTTAAATCA---AAA----A-GAAAGAGCTAAATAG-----GC--C---  
 Cabe AACACCCCTCC-----CAA----GGGGAC--TA-GCACGCT-GACCCT---  
 Bzze AACACCCCTGA-----TTATA-GGA--CTAAACTGATTGGGACC---  
 Siim ACGAACCTAAA-----TCAACAAGA--TGACTATACTGAAGACC---  
 Ctru A-----GACCCCT-TA---CAAAGGAGCA-----AA-CTAAATGACCCC-----  
 Dpbr AACAAACCTGACA-----AA----GGCAC-GAACTAAATGG-TCCC----  
 Caki -----AAAATGAG-----CTT-----TAATACAAGAACAACTTAA--TGGGAC--T  
 Phja -----TTAGCATAC-----TATAATAACAGTAAAAATCTAGTGAAAAA--T  
 Brsp AATATTCTG--CATCCAGTAAAAACTTAA-----TAATTT---  
 Gamo AC-----ATGC-TGT--GAT-AACAG--TAA--AACTTAGTGATATT-----  
 Lolo ATATACTA--GAATAACA-GT-----AAAACTTAGTGATATT-----  
 Batr -----T-AAAACA-----AACCACC-----  
 Prmy -----GTTTCA---AAATACACCAA-----  
 Loli AAAATCCTG-----CACCAAGGCCCTAAA-----CTAAATAATTCC---  
 Loam AACC--CCCGA-ACAAAGGA-----A-----TAAACAAGATGAAAG-----  
 Chab -GTACCCCTAAT-----AAAGGTGA---AAAC-----AGAGTATGCTA---C  
 Chto -----CAAGTACCCC-----T-AATAAAGGT-----GGAAACAGAGTATGCTA--C  
 Majo -----CAAGCACC-----TCCAGTAA-----GTAGAGATGAAACAAAATGAATA--C  
 Hlst A--AC-ACA-----TTAATAAAGTGAACAAA-----A--ATGGATA-----  
 Clpe AACCCCTTATACTAC--GCGG-GAACACAAC----GA-----GCC----CC  
 Mlmr -CTAGTCTTAAC-----ACAA--TACA-----GAACCAAAAAAGACC--CC  
 Crcr -----A-ATACCTCCCTCA---AATAG-----GTAACAA---CAAATGAA-C---C  
 Muce ATACCTCTCTCAAACAG-----GTAACAACAAAATGAACC  
 Bege TAT---AAT-----CT-GATTAAGAACAAA----ACCAATTGGAC-----CC  
 Mela -----GCTTCCTC-TAATG---AAAGAATAAGAC-----TAATATGAATCC----  
 Hats AAATCCCCCGG-----ATAAGGGAA--AG-----AAC-TAATTAGA---CCC  
 Orla -GGACAAC--AA-----CAAATTACTC---AA-----ACAAATTGGCTA--C--

Cosa TTAACCTAACC---CA--AATA-GATTAACTAATTG-----G-----CTTTC---  
Exsp TTAG-----ACCTAG--T-----TAAAGGA-----ACTAAGCC-AATTGGGTACC---  
Depa CTAAA-CCTTACTTAACAAGA-----ACAAACCAATTGGA---ACC  
Rima -----CCT-----T-AAT-----AAAA-----CTTTTTAAAGC--CCC  
Fuol -----TAAA-GTA-----TTGATTTAAAACAATTTAAAACAAATTGAA--TTC  
Gmaf -----AAAACATTCT-----TTTCA-AAAAATGA-----AACC---AACT--GACCCC  
Xeei AACC-----CCTTA--T-----TTACA-----AGATAAAA--CCAA---TTGATTCC  
Pros -----TTCACCCCA-----A-AA-----TAAAATTGAGGGGACAC--AATGGCCCC  
Scmi CC-TGCC-----AAAAATCAAAGGGGCA-----ATAAAAT-----GGCACC  
Rolo -----CAAACACC-----CCAAAATAAAGGG---GCAAATCA-A---GTGGCCCC  
Cere AGTAACTTCAA-----ATAA-----AAAGT--TATATTT---TTT-GCCCC  
Daga -ATGCTTTCAAT-----T-----AAAAAAGTT---AACTTGTGCCCC-T--G  
Anco -----TAACCTCCAAACA---AGGACTAAA-----CTAAGTGA---TATCC  
Dmve AGCACCCCC-----CGACAAAGGGTCAAA-----CCAAG---TGAAGCTC  
Dmar AGCAC-CCC-----CCGATAAAGGG--CTAA-----ACCAAGTGAACCCC  
Anka ---TAACC-----ATCAAACAAGAGAGTAA-----ACTA-----AATGAAAATC  
Moja AAGA--AACCCCA-----ACAAGG---AACTAACT---AAGTGACGCC  
Hoja ATAACTTTCAAAC-----AAGAAATAAACTAA---GT-GGAACCC  
Bede GACT--CCAGAATTAACCG-----AGCAATAAAATGACAATCC---  
Besp A--GACTCCAAAATTA--AAAC-GGAGCAATAAATGAC-----AACCC---  
Mysp ACAA-----CCCTG--A-----ACAGAGGACAAA-----ACA-CCAAAGGATCC---  
Osja ACAAC-CCAA--AATAAGGA-----CAAAACATAGGGGATCCC---  
Sgro -ACAGTTAAAGAC-----AAAAACCA-----AACCCAAATGGACTT--TCTG  
Pzpa AATGCTTTAA----AACAAAAAC--AAACC----CA-----ACGAGC-CC---  
Zeja A-----TACTTTTACA---CAAGAAAGAA--AAG---CC-----CAATGGCCCC  
Zzne AAAA--GCT-----TTAAATTAAAAAAGAA-----A---ACCCCA--GTGATTC  
Zefa A-TACTTTTGATTAT----AAA-AGAAA----AGCTCAATGG-----ATCC  
Acni A--TACTT-----TAAGACAAAAAGAAA--AGC-CCA-----ATGGCCCC  
Ncrh -----AAAATACT-----TTAAGACAAAAA-----GA-AAAGCCCAATGACCC--C  
Agca T-----ACCCCTCC----ACATAAGA--GGATTAACC-AA-----ATAACCCT  
Hydy -TGAGCCT-----GAAC--AAAGGACTAA----ACAGAATG-----GACCC  
Gsac T-----GACCCTAAT---AAAG-GATT----G----ACAAG-----ATGGAACC  
Pevo -----CAATCC--CC-----TTAAA-----TAAAAGACTAAACC---AAATAACAC--C  
Hiku AACAAATTAACACCA-----TATAAAAGGTATTTAAA----ACAA-----TAACC  
Inpa CCCTCAGCCCA-----ACAAAGGCCTTG----AACTA-AACAAC---CCC  
Auch AATTAGTCTAGACCAACAGAC-----AAGACT-----CGACTTGGACCCC---  
Fico A-CACCC-CCGATAA--GGCC-TCCAAA-CAAATA----G-----GC-CC---  
Macs TCACCTCCAAA-----A-AAGGA-----GTAAG-ACAA-AAC-GA-A--CCC  
Moal A-----ACCTTGTC----ATAACAAGTTATTAACC----AGTGA-----AACCC  
Syma -----ACATTA---CACA--AACATTCA-----TCT  
Maf r AACTTA-----CACG--ACCC-AAGCTAAAAG-----A-----ACCC  
Dcpe -----TCAGCAC-TT-----CAACACAAAGAATAAACTCTG-----TGAGCACAC--T  
Dct i -----TCAACT-----TCAAATAAAGAATAAAAC---TTTG--TGAACA--CACT  
Heh i A---TAACCCCAATAAGGGC-----CTG----AACT-AATGGAAT-CC---  
Stam AACACCCTTC-----ATAATAGGC-TAAACCAA-----ATGAAT-CC---  
Hog i A--CAATC-----CTAAATACAGGACCAA---A-CAAATGAAAG-----C  
Erzo CA-----CCCCCTTA---AT--ACCGG---ACTA-----AACTAAATGAAGCC  
Hxot AC-----ACCCCCA---AT--AAGGG---ACTA-----AACCAAGTGAGCCC  
Core -----TAAGCACCC-----CAAACAA-----GGGACTAAACCAA-GTGGGCC--C  
Apve AGCACCCCG-----ATAA--AGGACTAAA-----CCAAGTAAACCC---  
Lat j G-ACACCCTGA-----ATAAAGGAC-TGAAC-----TT-ATTGACC--ACC  
Laja -----CAAGCAAC-----CCCTGACAAGGGGTCA-----AACCAAA--TGCACC--C



Syja ACAACCCT-----AAAC---ACAGGGCCAA-----ACCAGACGAATA-----C  
 Epme A-ATACCCCAA-----ATATGAGG-----CACGAATAA- ACTGAAT-- TTC  
 Grse -----CCACTCTC-CCACA---AAGAGAA-----AAAGC---AAAT-G----ATCCCC  
 Clja -----TAAGGCCCC-----CTAAA-AAGGAATAAA-----ACTTAAATACCA---C  
 Ogcy -----CAAAAACCCT-----A-AACAAAAAAA-----AGAACTTATAGAAAACCC--CC  
 Plna AAAC-----TTTCC--A-----TAA-----AAAGACTAAA--CCAACGGCCCC---  
 Lema -ATACCCCAAAC-----ACAGGGCCG-----AACTAAATGA---GC--A  
 Etzo -----TAAACTC-----CCTGAC-----AAGGGACAAAACCAG-GTGAATC--C  
 Apse -----TAAGTAACC-----CCATATAAGGGC-----CTGAACC--TAGTGGCTA--C  
 Epde AACACCCTTG-----AACAAAAGGACCAA-----CCAAATGAAACC---  
 Slja AAAC---ATCCCCT-----GTGAAAGGG-----TTAAACTGTATG-----GCCAC  
 Bsja A-TAACACCAAAC---AAAG-GACCAA---ACAACACAAC-----A-CTC---  
 Ecna T-AAACTCTAA-----ATTAAGAATTGAACCT-AATG-GAATAC  
 Cohi -----ATAACCCCTTGTTA-----AAGGAGTAAATC---TATGCTAA---TCC  
 Caar AACACCCTGAACAC-----AACAGCCCAAACCTAATG---GCTTCC  
 Came AACACCCCC-----AATAAAGGCC-CAAACCTA-----ATG---ACCACC  
 Mema AACAACCCTAA-----ATAAATGGA--TTAA-----ACCAA---ATGAGAC  
 Lenu AAAACCCCTAACA-----CACAGAAGA-----AACTAAAT---GGATGAC  
 Brja ACACCCCTGGACAAAG--GACT-TAACTAAAG-----GA-----ACCA  
 Plma AACATCCCTA-----GATAAAGGGC-TAAACC---AA-----ATGAA-ATA  
 Emst A--AC-ACC-----CCCGAATAAGGGGCT---AA-----AC-----CAGATGAGACC  
 Ptti AAAA-----CCCTAA--A-----ACAAA-----GACCAAACC-AAATGAAC-CC  
 Losu GCACCCATTAAGGAC--T---AAACTTAA---C---GG-----CCCC-  
 Geoy ATACT-CTTA--GACAAAAGA-----CCGAACG-GTATAAACAC  
 Dipi ACAC--CCCTAATCAA-AGGG-----CCAACTAAATGGGTACC  
 Pama AGCACCCCTTA-----ACAAAGGA-----A--AAAACCAA---ATGAA-GCC  
 Leob A-CCTTCTCCAACAA---GAAA-AGAAAA-----ACTAAATAG-----ACTCC---  
 Neba AT-----ATATACAG---AAC-AAAGA---TAT---CCAAAT-----AAGGAATAC  
 Pdpi -----CACTAAC-CC-----CAAATAAAGGGCAC-----CAACTAATAAGAC-C--C  
 Nimi -----AAACCCCC-TAACA---AAGGACTGA-----AC---TAAC-----TGAACCC  
 Uptr -----TAAGCCTACC-----CTTGATAAAGGACTAAAC-----G---AAATGAGAC--C  
 Pesc -TCCCCAAGTA-----TAAATGACA-----AAACT-----TAATG-ACCC--C  
 Baar -----CTGTCCCCTAAACA---AAGGGCCAAA-----CCTAA-----TGACCC  
 Moar -ACACCCCAAACAA-GGGGCCAAACCAG-----ATGAA-CCC  
 Toja AGCAACCCTAAAT-----AAGGGACTG-----AACT--AACTGGCCA--C  
 Chau AGCACCCCTCAA-----ATAAGA-----GGCT-AAACTC-AGTG--TT-CAC  
 Chse A--CACTC-----CAGATCAACGGACCAA---ACTAATTAATTA-----C  
 Enar ATACCTTC-----TCAC---AAGGACCAA---ACAAAATAATCC-----C  
 Hpty -AGACCCCAAAA-----CAAGGGGT-----AAACCAAATGAACCC---  
 Nana ACCTCCCCCT-----CATACGGGAA---CGAACAAAAA-----CACC  
 Mcst A--GC-ACC-----CCTGAATAA--AGGACTAA-----ATGTATTGAAACC  
 Rhox A-CACCCCTAAA--CA--AAG--GACTAAACCC--CGTGA-----ACAC  
 Opfa AGCACCCCAA-----ATTAAGGG-----CCAAACCAGAG-----GAGCCC  
 Paar TTAC--CCCG--AATAAGAA-----T-----AAAGCCAAA---CTGACTCC  
 Gozo AACACCCCTAG-----AAAA-----CGGACT-AAACCA-A--ATGAG-ACC  
 Ackr -----TAAAAGAATC-----T-----AACTACAGA--ACAGAACTAAATGACAT---C  
 Elev ACAC--CCCTACT-AA-AGGA-----CTAAA-----CCAAA--TTG---ACCC  
 Trdu -----TAAGCACCC-----TCAAATAAAGAACA-AA-----ACT--CATTGACCC--C  
 Amoc A-AATCCCAAT-----TAAAGGACT-----GAACACTA-GAGTG--AGACC  
 Hame A-TACCCCTAAACA-----AAG-GACTAAAC-----TAATTA-----ACCC  
 Chso A--ACCCCTCCCA--CAAGAGG-----CCAACT---AGATG-ACCC  
 Lyto ----TAACCCTGAATAAAGGC-----TTA-----AACCAAGT-----GGAACC

Encr ATAG-----TCCTGA--A-----TAAAGGAGC-AAACC-----AAG---TGGAA-TC  
 Bvar A-----TAAATCTAATT-----AAAGGCCTAAAC---T-TA-----CAAACCCC  
 Noco AAAG--ACC-----CCCTAATAAGGGCACAA----AC-----CAAA--AGGACCCC  
 Chsp -----CGCACATCC-----CCACATAACGG-----GACAACCAAA--TGTAACCC  
 Arja GCAC-----CCTTG--A-----TAAAGGACTAAACCAA-----ATGAGACC  
 Pase CAACCCCTTAA-----AGGATACT--AGAGCT-----TGAAAGACCAC  
 Trel GTCAATTAACCCC-----CACACGGACTG-----AACTAA-----TTGGATCC  
 Lifa --TACCTACCA--CA--AAGA-GATCTAACCT---ACCGA-----CCTC  
 Acur TGCCTATTACT-----AATAGAGGACAA-AC-----AA-AT---GAGACCT  
 Ampe -ACACCTCCCA-----TAAGGAGCCC---A-----AACCAA---TGGTCCC  
 Urja AATTACC-----CTTTACAAAGGATCAA----ACTAAAT-----GTTTAGCC  
 Enet C-----TACCAAAGCT---TGATTAACAGCT---CACACCCTATGG--CCATTCCCC  
 Ptbr GCGAA-CTTAC-ATGAAAAGA-----ATAACA-ATAAGAA---C-TTA  
 Safa TAAACTCTTAATT-----ACAAGCT-----AAAGCCATAAGGA---CC  
 Icae -ACACCCCAA-----ACAAAGGGTT---AAA-----CCAAATGAACA-C--A  
 Asmi -GCCTTTTTAGATT-----GCTAGACTA---TG-----TATTTTA-CCTC--C  
 Foal ---CTTT-----AAATTAATAA---CTGTG-AAC-TAATTA-----AACC  
 Drze -TTAATACTAAC-----AACAGAAC-----AAACAAATTA---GATAC  
 Rhas ----TAAACCCC-----TAAACAAAAGAC-----TAAACCAAATGACTC---C  
 Elac TTA---AAC-----CTTAATTAAGAACA---GCC-----AGACACCCC  
 Kugu ATAGATTA-----AAAATAAATAAACCTAA-----ACCA-----GCAATCC  
 Plor -ACACACCCAAAC-----ACGGAACCA-----AACTAAAT--GA---TAC  
 Sgun A---CACCCCTTAATAAGAGA-----CTAAA-----CAA---GATGAAAC--C  
 Zaco ACA-CCCC--TAAACAAAGGA---CTAAACCA-----A--GTGAAAC--C  
 Zbfl -----TAAGTACC-----TCTAATAAAGAACCAAA-----CCAGA--TGAACC--TC  
 Spba GCATA-CCTA--AATAAGGA-----CTGA-----GCCTAA---TGAAAC  
 Game ACACCCCCAGA-----C-AAAGGGTTAA-A-----CCA-AAT---GAACCG  
 Thth ACAC--CCCTAAACAAAGGA-----CTAAACCA-----AATG-----AATCA  
 Xigl AACACCCCA-----AATAAG-GGACCAA-----CT-----AAATGACCCC  
 Hyja -----CTATCCCTACACC---TGGAATTAAC---C-----TA---TTGAATCA  
 Psan TCTAC-CCC-----TAAACCCTGAGGACTAA---AC--CT-----ATTGAAACA  
 Cupa -----TAAACAC-CC-----TTAATAAAGATTAAGCC-----A--AATGATCTA  
 Mpch ATAACCCC-----AAAT--AAAGGAAAA---ACC-----AAAAGAACAAC  
 Char -----ACACCC--CAGTA---AAAGGGCAAAAC---CA-----A---AAGGACCC  
 Pser ACAC-----CCCGA--A-----CTAAAGGAATAAAC--T-----GATTGGATGC  
 Prol -ATACACCCAGC-----TAAGGGCCCT---GAA-----CT--AA--ATGAAAC  
 Plbi -----CAAGTACCC-----C-AGCTAAGGTCCGAAC---A-----AATGG--AGCC  
 Calu GGATCCACCTAAGGG--AA--AGAATAATT-----GGACCC  
 Papa AACAC-CAC-----CAAACAAAGCAAAGTGA-----ACCA--TGGTGCC  
 Suf r -----AGT-----AACCCTTATAAAGGA-----ACTA-----AACATACGTAAC  
 Stci ATCAA-CCC-----CTAATAAAGGA-CTTA---AC-----CTTATGACCAC  
 Taru -----ATAAACCTAATA---AAGGGAATAAAC---CTAGTGA-----A-CC  
 Rala AACACCCCAAATTT-----AAAGGACTAAACC---AAA-----TG-AGCC

|      | 44'      | 45     | 45'   | 46    | 46'   |       |      |      |           |           |      |        |        |
|------|----------|--------|-------|-------|-------|-------|------|------|-----------|-----------|------|--------|--------|
| Scca | AATTTAAC | TATTTT | GGTTG | GGG   | TGACC | -AA   | GGGG | AAA  | -AATGAATC | CCCC      | TTA  | -TCGAC |        |
| Muma | AACTTAAC | TGTTTT | GGTTG | GGG   | TGACC | -GA   | GGGG | GAA  | -AACAAATC | CCCC      | TCA  | -TCGAT |        |
| Erca | TGGCTAAA | TGTCTT | AGTTG | GGG   | CGACC | -AC   | TGAC | AAC  | -AAATAAAC | CTCA      | GAG  | -ATGAT |        |
| Pose | GGCCATAA | AGTCTT | AGTTG | GGG   | CGACC | -AC   | TGAC | AAC  | -AAATAATC | CTCA      | GCG  | -ATGAT |        |
| Actr | GATCCTAA | TGTTTT | TC    | GGTTG | GGG   | CGACC | -AC  | GGAC | GAC       | -AAAAAAGC | CTCC | ATG    | -TCGA- |
| Scal | GATCCTAA | TGTTTT | TC    | GGTTG | GGG   | CGACC | -AC  | GGAC | GAC       | -AAAAAAGC | CTCC | ATG    | -TCGA- |
| Posp | GATCCTAA | TGTTTT | TC    | GGTTG | GGG   | CGACC | -AC  | GGAC | GAC       | -AAAAAAGC | CTCC | ATG    | -TCGA- |
| Atsp | GGTCCTAA | TGTTTT | TC    | GGTTG | GGG   | CGACC | -AC  | GGAC | AAA       | -AACAAAAC | CTCC | ATG    | -TCGA- |
| Leoc | GGTCCTAA | TGTTTT | TC    | GGTTG | GGG   | CGACC | -AC  | GGAC | AAAA      | -ATA-AAAC | CTCC | ACG    | -TCGAT |
| Amca | TGATTCTA | CGTTTT | TC    | GGTTG | GGG   | CGACC | -AA  | GGAC | AAA       | -AACAAACC | CTCC | ATG    | -TCGAC |
| Osbi | ACATACAA | CATCTT | TC    | GGTTG | GGG   | CGACC | -AT  | GGAC | GAC       | -AAAAAAGC | CTCC | AAG    | -AAGAA |
| Pabu | GACCCACT | TGTCTT | TC    | GGTTG | GGG   | CGACC | -AA  | GGAC | GAAA      | -ACA-CAGC | CTCC | TAG    | -AAGAA |
| Hial | GGACTGAA | TATCTT | TC    | GGTTG | GGG   | CGACC | -GC  | GGAC | GAA       | -AACAAAGC | CTCC | ATG    | -TGGAC |
| Elha | GGCCACGA | TGTCTT | TC    | GGTTG | GGG   | CGACC | -GC  | GGAC | GAA       | -AACCTAGC | CTCC | ATG    | -TGGAC |
| Mlcy | GCCCCACA | TGCCTT | TC    | GGTTG | GGG   | CGACC | -GC  | GGAC | AAA       | -AACAAAAC | CTCC | ACG    | -TGGAC |
| Algl | GATTGGAT | TGTCTT | TC    | GGTTG | GGG   | CGACC | -GC  | GGAC | GAG       | -AAAAAAGC | CTCC | ATG    | -TGGAG |
| Ptgi | GGCCGGA  | TGTCTT | TC    | GGTTG | GGG   | CGACC | -GC  | GGAC | GAA       | -AAAACAGC | CTCC | ATG    | -TGGAA |
| Alaf | GGCTAAAA | TGTCTT | TC    | GGTTG | GGG   | CGACC | -TC  | GGAC | GAA       | -AAACAAGC | CTCC | GCA    | -TGGAC |
| Nock | GGCCAGAA | TGTCTT | TC    | GGTTG | GGG   | CGACC | -TC  | GGAC | GAA       | -AAACAAGC | CTCC | GTG    | -TGGAC |
| Anja | GATCCAAA | TGTCTT | TC    | GGTTG | GGG   | CGACC | -AT  | GGGG | GAG       | -AAAAAAGC | CCCC | ACG    | -AGGAA |
| Gyki | GATCAATA | TGCCTT | TC    | GGTTG | GGG   | CGACC | -GT  | GGAC | GAG       | -AGAAAAGC | CTCC | ATG    | -TAGAA |
| Syka | GACTTATA | TGCCTT | TC    | GGTTG | GGG   | CGACC | -AT  | GGAC | GAA       | -AACAAAGC | CTCC | ACA    | -TGGAA |
| Opma | TGACCACA | TGCCTT | TC    | GGTTG | GGG   | CGACC | -AC  | GGGG | GAA       | -AACAAAGC | CCCC | GAA    | -TGGAA |
| Comy | TGATTAAT | TGCCTT | TC    | GGTTG | GGG   | CGACC | -AC  | GGGG | AAA       | -AATAAAAC | CCCC | ACA    | -TGGAA |
| Sasp | TTAGTGCA | TGTCTT | TC    | GGTTG | GGG   | CGACC | -AT  | GGGG | GAT       | -AAAAAAGC | CACC | ATA    | -AAGAT |
| Eupe | TTGACTAA | TGTCTT | TC    | GGTTG | GGG   | CGACC | -AT  | GGGG | GAA       | -AAGAAAGC | CCCC | ACA    | -CAGAC |
| Enja | GGTAATGT | AGTCTT | AGTTG | GGG   | CGACC | -AC   | GGGA | GAA  | -AGTAAAGC | TCCC      | AAG  | -CAGAC |        |
| Same | GGCATAAG | TGTCTT | TC    | GGTTG | GGG   | CGACC | -AC  | GGGA | GATA      | -GCA-CAGC | TCCC | GAG    | -TGGA- |
| Chch | GGTCCGCC | TGTCTT | TC    | GGTTG | GGG   | CGACC | -GC  | GGGG | CAA       | -AGACAAAC | CCCC | ATG    | -TGGAA |
| Grgr | GGCCTGCC | TGTTTT | TC    | GGTTG | GGA   | CGACC | -GC  | GGGG | GAG       | -AACCGAGC | CCCC | ATG    | -TGGAG |
| Caau | TGAGATTT | TACCTT | TC    | GGTTG | GGG   | CGACC | -AC  | GGAC | GAA       | -AAAAAAGC | CTCC | AGG    | -TGGAC |
| Cyca | TGAGATTT | TACCTT | TC    | GGTTG | GGG   | CGACC | -AC  | GGAC | GAA       | -AGAAAAGC | CTCC | AGG    | -TGGAC |
| Dare | TAAACCTC | TACCTT | TC    | GGTTG | GGG   | CGACC | -AC  | GGAC | TAA       | -AAAACAAC | CTCC | AAG    | -CGGAA |
| Cost | TGGAGCTT | TACCTT | TC    | GGTTG | GGG   | CGACC | -AC  | GGAC | AAA       | -AAATTATC | CTCC | GAG    | -TGGAT |
| Leec | TGAAGTTT | TACCTT | TC    | GGTTG | GGG   | CGACC | -AT  | GGAC | AAT       | -AAAAAATC | CTCC | AAG    | -TGGAA |
| CrIa | GTGGAATT | TACTT  | TC    | GGTTG | GGG   | CGACC | -AC  | GGAC | AAA       | -AAAAGATC | CTCC | GAG    | -TGGAC |
| Clmc | CTGGCTGA | CGTCTT | TC    | GGTTG | GGG   | CGACC | -GC  | GGGG | TAA       | -AACAAAAC | CCCC | ACG    | -TGGAA |
| Phin | CTGACCAA | AGTCTT | AGTTG | GGG   | CGACC | -AT   | GGGG | AAA  | -AACAAAAC | CCCC      | ACG  | -TGGAA |        |
| Icpu | CTGATCCT | AATCTT | TC    | AGTTG | GGG   | CGACC | -AC  | GGGA | GAA       | -AATAAAGC | TCCC | ACG    | -CGGAC |
| Psto | CTGATCCC | TGTCTT | TC    | GGTTG | GGG   | CGACC | -GC  | GGGA | GAA       | -AACAAAGC | TCCC | ACG    | -CGGAC |
| Cora | CTGATCAT | AATCTT | TC    | GGTTG | GGG   | CGACC | -AC  | GGAA | TAA       | -AAACAAC  | TCCC | ACA    | -TGGAC |
| Eisp | TTGGTCCC | TGTCTT | TC    | GGTTG | GGG   | CGACC | -GC  | GGAC | GAA       | -AACAAAGC | CTCC | ATG    | -TGGAA |
| Apal | CTGGCCTA | CGTCTT | TC    | GGTTG | GGG   | CGACC | -AC  | GGAC | AAA       | -AACAAAGC | CTCC | GCG    | -CAGAA |
| EsLu | GGCCTACA | TGTCTT | TC    | GGTTG | GGG   | CGACC | -AC  | GGGG | GAA       | -AACAAAGC | CCCC | ACG    | -AGGAT |
| Dape | GGCCACA  | TGTCTT | TC    | GGTTG | GGG   | CGACC | -AT  | GGGG | GAAA      | -ATA-AAGC | CCCC | ACG    | -AGGAC |
| Glse | GACCTTAA | TGTCTT | TC    | GGTTG | GGG   | CGACC | -GC  | GGAC | GAA       | -AACTAAGC | CTCC | ATG    | -TGGAC |
| Naar | AGCCAACA | TGTCTT | TC    | GGTTG | GGG   | CGACC | -GC  | GGGG | GAA       | -AATCAAGC | CCCC | ATG    | -TGGAC |
| Baoc | CGCCAACA | TGTCTT | TC    | GGTTG | GGG   | CGACC | -GC  | GGGG | GAA       | -AACCAAGC | CCCC | ATG    | -TGGAA |
| Opso | AGCCTGAA | TGTCTT | TC    | GGTTG | GGG   | CGACC | -GC  | GGGG | AAA       | -AATTAAC  | CCCC | ACG    | -TGGAT |
| Alte | GACCAACA | TGTCTT | TC    | GGTTG | GGG   | CGACC | -GC  | GGGG | GAG       | -AAACAAGC | CCCC | ACG    | -TGGAC |
| Plap | GACCAGCA | TGTCTT | TC    | GGTTG | GGG   | CGACC | -GC  | GGGG | GAA       | -AAACAAGC | CCCC | ACG    | -TGGAC |

Plal GTCTCTCC TGTCTTC GGTTC GGG CGACC -GC GGAC GA - -CAAAAAGC CTCC ATG-TGGAC  
 Sami GCCTCCCC TGTCTTC GGTTC GGG CGACC -GC GGAC GAT - -AGCAAAGC CTCC TTG-TGGAC  
 Rere GTCTCACC TGTCTTC GGTTC GGG CGACC -GC GGAC GAC - -AAAA-AGC CTCC ATG-TGGAC  
 Gama ATCTTGAC TGTCTTC GGTTC GGG CGACC -GC GGGG GAA - -AAGACAGC CCCC ATG-TGGAA  
 Onmy AGCCCATATGTCTTT GGTTC GGG CGACC -GC GGGG GGAA -AATTAAGC CCCC ACT-GTGGAA  
 Sasa AGCCCATATGTCTTT GGTTC GGG CGACC -GC GGGG GAA - -AACAAAGC CCCC ATG-TGGAA-  
 Cola AGCCCATATGTCTTT GGTTC GGG CGACC -GC GGGG GAA - -AACAAAGC CCCC ATG-TGGAC  
 Dita CTCCCACT TGTCTTT GGTTC GGG CGACC -GA GGAC GAG - -AAGA-AGC CTCC ACA-CGGAC  
 Gogr TTCCTAAG CGTCTTT GGTTC GGG CGACC -AC GGGG GAC - - -AAAAGC CCCC CCG-CGGAC  
 Chsl AATCTACT TGTCTTT GGTTC GGG TGACC -AC GGAC GAA - -AAATTAGC CTCC ATG-AGGAC  
 Atja GCTTTGAA TATCTTT GGTTC GGG CGACC -AC GGGG GAA - -AAGTAAGC CCCC ATG-AGGAC  
 lido TACTTTAA TATTTT GGTTC GGG CGACC -AC GGGG GAC - -AAATAAGC CCCC ACG-AGGAC  
 Auja TGTTGAAA TGTCTTT GGTTC GGG CGACC -GT GGGG AAA - -ACAA-AAC ACCC ATG-TGGAC  
 Chag CCGTTTAG TGTCTTT GGTTC GGG CGACC -GT GGGG AAAA -GAA -AAAC CCCC ATG-AGGAC  
 Hami TGCTGAAC TGTCTTC GGTTC GGG CGACC -GT GGGG TAAA -ATT -AAC TCCC ATG-AGGAC  
 Saun TGCTGAAC TGTCTTC GGTTC GGG CGACC -GT GGGG TAT - -AAAAAAC TCCC ATG-AGGAC  
 Nema CGCCGAAA TGTCTTT GGTTC GGG CGACC -GC GGGG AAA - -GAAAAAAC CCCC ACG-TGGAC  
 Disp CGCTGAAA TGTCTTC GGTTC GGG CGACC -GC GGGG AAA - -AACAAAAC CCCC ACA-TGGAC  
 Myaf TGCTGGGA TGTTTTC GGTTC GGG CGACC -AC GGGG AAA - -AACAAAAC CCCC ACA-TGGAC  
 Lagu TTTCCCAA TGCCCTTT GGTTC GGG CGACC -AC GGAC ATA - -AACAAAAC CCCC GCG-TGGAC  
 Trtr TATCTAAA TGTCTTT GGTTC GGG CGACC -GC GGAC ACAA -ATC -TAAC CCCC GCG-TGGAT  
 Zucr CCCCTAAA TGTCTTT GGTTC GGG CGACC -GC GGAC ATA - -AACTAAAC CACC GCG-TGGAT  
 Pxja TATCAAAG TGTTTT GGTTC GGG CGACC -GC GGGG AAA - -ACA -AAAC CCCC ATG-TGGAC  
 Pxlo TATCAAAG TGTTTT GGTTC GGG CGACC -GC GGGG AAA - -A -CAAAAC CCCC ATG-TGGAC  
 Pctr CGGGAAAC TGTCTTT GGTTC GGG CGACC -GC GGGG GAT - -GAAA -AGC CCCC ATG-TGGAA  
 Apsa TTAGTAAG TGTCTTT GGTTC GGG CGACC -AC GGGG GAC - -AATAAGC CCCC ATG-CGGAA  
 Cabe TCCTCATA TGTTTTC GGTTC GGG CGACC -AA GGGG TACA -ACG -GAAC TCCC ACG-TGGAT  
 Bzze TGCCCTAC TGTCTTT GGTTC GGG CGACC -GC GGGG AAAA -ACA -AAAC CCCC ACG-TGGAA  
 Siim TTCCATAA TGTCTTC GGTTC GGG CGACC -AC GGGG TAAA -AAA -CAAC CCCC ACG-TGGGA  
 Ctru CGTCCTAA TATCTTT GGTTC GGG CGACC -GC GGGG TAA - -CATAAAC CCCC ATG-TGGAG  
 Dpbr TATCCTAA TATCTTC GGTTC GGG CGACC -GC GGGG CAA - -CACAAAAC CCCC ATG-TGGAA  
 Caki TATTTAAA TGTCTTT GGTTC GGG TGACC -AC GGGG CAA - -AACATAAC CCCC ACG-AAGAT  
 Phja TATTGAAG TGTCTTT GGTTC GGG CGACC -AT GGGG TAA - -AACATAAC CCCC ATA-CGGAC  
 Brsp TATTC AAG GGTCTTA GGTTC GGG CGACC -AC GGAC TAA - -AATAAAC CTCC ACG-AAGAA  
 Gamo TACTGAAG TGTCTTT GGTTC GGG CGACC -GC GGGG TAA - -AACACAAC CCCC ATG-TGGAC  
 Lolo TATCGAAG TGTCTTT GGTTC GGG CGACC -GC GGGG TAA - -AACACAAC CCCC ATG-TGGAC  
 Batr TGAGCTTC TTCCTTT GGTTC GGG CGACC -AT GAGA AAT - -AAAACAAC TCTC ATA-AGGCA  
 Prmy CTTACGCT TACTTTC GGTTC GGG CGACC -GT GAAC AAC - -AAAATAAC CTTG ATA-AGGAA  
 Loli TGACCTGA CGTCTTC GGTTC GGG CGACC -GC GGGG GAA - -AGAAAAAC CCCC ACG-TGGAC  
 Loam CTACCCTA TGTCTTT GGTTC GGG CGACC -GC GGGG CAA - -AAAGTACC CCCC ATG-TGGAA  
 Chab TGTCCCAA TGTCTTC GGTTC GGG CGACC -AT GGGG AAA - -TAAGAAAC CCCC AAAGTGGAA  
 Chto TGTCCCAA TGTCTTC GGTTC GGG CGACC -AT GGGG AAA - -TAAAAAAC CCCC AAAGTGGAA  
 Majo TCACCTAA TGTTTT GGTTC GGG CAACC -GC GGGG TAA - -TAGAAAAC CCCC GCG-TGGAA  
 Hlst CCTCTTAC AGTTTTC GGTTC GGG CGACC -GC GGGG TAA - -CAGAAAAC CCCC ACG-TGGAA  
 Clpe TGTCTGG TGTCTTC GGTTC GGG CGACC -AC GGGG TAA - -TAGATACC CCCC GCG-CGGAA  
 Mlmr TGTTC AAT TGTCTTC GGTTC GGG CGACC -AC GGGG CAA - -TACAAAAC CCCC GCG-CGGAA  
 Crcr CTGTTCCA CGTCTTA GGTTC GGG CGACC -AC GGTC AAC - -AGAAAAAC CCCC GCG-TGGAC  
 Muce CTGTTCCA CGTCTTA GGTTC GGG CGACC -AC GGTC AAC - -AGAAAAAC CCCC GCG-TGGAC  
 Bege TGCCCCA TGTCTTT GGTTC GGG CGACC -GC GGGG GAA - -CAAAAAGC CCCC ATG-TGGAG  
 Mela TGCCCTAA TGTCTTT GGTTC GGG CGACC -GC GGGG CAC - -CAAAAACC CCCC ACG-TGGAA  
 Hats TGTTCTAA TGTCTTT GGTTC GGG CGACC -AC GGGG AAAC -GAA -AATC CCCC ATG-TGGAA  
 Orla TGTTTTTA TGTCTTT GGTTC GGG CGACC -GC GGGG AAA - -TAAGAATC TCCC ATG-AGGAT

Cosa TGCCCTAA TGTCT TTTGGTTG GGGCGACC -GC GGGC AAA - - TAAAAAC CCCC ACG - TGGAA  
Exsp TGCCCTAA TGTCT TTTGGTTG GGGCGACC -AC GGGC AAA - - CAAAGAAC CCCC ATG - AGGAG  
Depa CACCTTAA TATCT TTTGGTTG GGGCGACC -GC GGGC CAA - - TAAAAAC CCCC ATG - TGGAA  
Rima TGCTCATT TATCT TTTGGTTG GGGCGACC -AC GGAC A - A - - AACTTATC CTCC ACG - CTGCA  
Fuol TGCCGCAA TGTCT TTTGGTTG GGGCGACC -GC GGGC AAA - - AACCAAAC CCCC GCG - CGGAA  
Gmaf TGCTCAA TGTCT TTTGGTTG GGGCGACC -CC GGAC TAA - - TAAAAAC CCCC GAG - CGGAC  
Xeei TGTCATGA TGTCT TTTGGTTG GGGCGACC -AC GGGC AAA - - CAACCAAC CCCC ACG - TGGAG  
Pros TGCTCAA TGTCT TTTGGTTG GGGCGACC -CT GGGC AAA - - AACACAAC CCCC ACA - TGGAA  
Scmi CCGCTCAA TGTCT TTTGGTTG GGGCGACC -CT GGGC AAA - - AACGAAAC CCCC GCG - CGGAA  
Rolo TGCTCAA TGTCT TTTGGTTG GGGCGACC -GC GGGC AAA - - AATAAAC CCCC ACG - TGGAA  
Cere TGCTTGA TGTCT TTTGGTTG GGGCGACC -GC GGGC AAAT - AAA - TAAC CCCC ATG - TGGAT  
Daga CTTTTAAG TGTCT TTTGGTTG GGGCGACC -GC GGGC AAA - - - GCAAAAC CCCC ATG - TGGAA  
Anco TGCCAGAA TGTCT TTTGGTTG GGGCGACC -GC GGGC AAA - - AACCAAAC CCCC ATG - TGGAA  
Dmve TGCCCCAG TGTCT TTTGGTTG GGGCGACC -GC GGGC AAA - - AACTAAAC CCCC ATG - TAGAT  
Dmar TACCCCAA TGTCT TTTGGTTG GGGCGACC -AC GGGC AAA - - AACCAAGC CCCC ACG - CGGAC  
Anka TGCCAGAA TGTCT TTTGGTTG GGGCGACC -GC GGGC AAA - - AGCAAAC CCCC ATG - TGGAA  
Moja TGCCAGAA TGTCT TTTGGTTG GGGCGACC -GC GGGC AAA - - GACTAAAC CCCC ATG - TGGAA  
Hoja TGCCAGAA TGTCT TTTGGTTG GGGCGACC -GC GGGC AAA - - AACACAAC CCCC ATG - TGGAA  
Bede TGCTCAA TGTCT TTTGGTTG GGGCGACC -AT GGGC AAA - - AACAAAAC CCCC ACG - TGGAA  
Besp TGCTCAA TGTCT TTTGGTTG GGGCGACC -AT GGGC AAA - - AACGAAAC CCCC ACG - TGGAA  
Mysp CGCCAAA TGTCT TTTGGTTG GGGCGACC -GC GGGC AAA - - AATTAAC CCCC ACG - TGGAA  
Osja CGCCAAA TGTCT TTTGGTTG GGGCGACC -GC GGGC AAA - - AACAAAAC CCCC ACG - TGGAA  
Sgro CCTGATTA TGTCT TTTGGTTG GGGCGACC -GC GGGC AAA - - AACAAAAC CCCC ACG - TGGAA  
Pzpa TGCACAAC TGTCT TTTGGTTG GGGCGACC -GC GGGC AAA - - AACAAAAC CCCC ACG - AGGAC  
Zeja CGCACAAC TGTCT TTTGGTTG GGGCGACC -GC GGGC AAA - - AACAAAAC CCCC ACG - AGGAG  
Zzne TCCACAAC TGTCT TTTGGTTG GGGCGACC -GC GGGC AAA - - AACAAAAC CCCC ACG - AGGAT  
Zefa TGCACACC TGTCT TTTGGTTG GGGCGACC -GC GGGC AAA - - AATAAAC CCCC ACG - AGGAT  
Acni TGCACAAC TGTCT TTTGGTTG GGGCGACC -GC GGGC AAA - - AACAAAAC CCCC ACG - AGGAC  
Ncrh TGCACAAC TGTCT TTTGGTTG GGGCGACC -GC GGGC AAA - - AACAAAAC CCCC ACG - AGGAC  
Agca TACCTCTA TGTCT TTTGGTTG GGGCGACC -GC GGGC AAA - - TAAAAAC CCCC ACG - TGGAA  
Hydy TCCCCTAA TGTCT TTTGGTTG GGGCGACC -GC GGGC TAC - - TAAACAAC CCCC ACG - TGGAG  
Gzac CACCCTGA TGTCT TTTGGTTG GGGCGACC -GC GGGC AAG - - TAAATAAC CCCC ATG - TGGAG  
Pevo TGCTTCCC TGTCT TTTGGTTG GGGCGACC -AC GGGC AAA - - AGAATAAC TCCC GCG - TGGAA  
Hiku TCATCCTA AGTCT TTTAGTTG GGGCGACC -GC GGAC CAA - - AACAAAAC CTCC GTG - AGGAA  
Inpa TGCCCAAC AGTCT TTTGGTTG GGGCGACC -GA GGGC TATG - ACA - CAAC CCCC ACG - CGGAA  
Auch TGCTTGA TGTCT TTTGGTTG GGGCGACC -AC GGGC AAA - - AATAAAC CCCC ACG - TAGAA  
Fico TGCTTGA TGTCT TTTGGTTG GGGCGACC -GC GGGC ACA - - TAAAGAAC CCCC ACG - TGGAA  
Macs TGTTTGA TATCT TTTGGTTG GGGCGACC -GC GGGC AAAT - AAA - TAAC CCCC ACG - TGGAC  
Moal TGCTTCCC TGTCT TTTGGTTG GGGCGACC -AG GAGA AAC - - TAAAAAC TCTC CCG - AGGAG  
Syma TATTTCAA TGCT TTTGGTTG GGGCGACC -AA GGAC AAT - - TAACCAAC CCCC ACG - TGGAA  
Mafr TGCTCTAA TGTCT TTTGGTTG GGGCGACC -AC GGGC AAA - - AAAACAAC CCCC ACG - CAGAC  
Dcpe TGCTTAAA TGTCT TTTGGTTG GGGCGACC -GC GGGC CAA - - TAAACAAC CCCC AAG - AGGAC  
Dcti TGCTTGA TGTCT TTTGGTTG GGGCGACC -GC GGGC CAA - - CAAACAAC CCCC AAG - AGGAC  
Hehi TTCCCTAA TGTCT TTTGGTTG GGGCGACC -GC GGGC AAA - - CAAAAAC CCCC ACG - TGGAA  
Stam TCCCCTAA TGTCT TTTGGTTG GGGCGACC -GC GGGC AAA - - GAAAAAC CCCC ATG - TGGAA  
Hogi CAACTTAA TGTCT TTTGGTTG GGGCGACC -GC GGGC AAA - - CAAAAAC CCCC ATG - TGGAA  
Erzo TGCCGAA TGTCT TTTGGTTG GGGCGACC -GC GGGC CAT - - TAAAAAC CCCC ACG - TGGAA  
Hxot CGCCCTAA TGTCT TTTGGTTG GGGCGACC -GC GGGC AAT - - TACAAAAC CCCC ACG - TGGAA  
Core TGCCCTAA TGTCT TTTGGTTG GGGCGACC -GC GGGC AAT - - TAAAGAAC CCCC ACG - TGGAA  
Apve TGCCCTAA TGTCT TTTGGTTG GGGCGACC -GC GGGC AAC - - TAAATAAC CCCC ACG - TGGAA  
Latj TACTCAA TGTCT TTTGGTTG GGGCAACT -AT GAGC - AAC - AAA - AAC CCTC ACG - TGGAA  
Laja TGTCCAA TGTCT TTTGGTTG GGGCGACC -GC GGGC AAC - - TACAAAAC CCCC ACG - TGGAA

Syja TGCCCGAA TGTCTTTGGTTGGGGCGACC-ACGGGC AA--CACAAAACCCCCGCG-TGGAT  
 Epme TGCCCTAA TGTCTTAGGTTGGGGCGACC-GCGGACCAAC-AAA-AAACCCCCGCA-AGGAC  
 Grse TGCCCTAG TGTCTTCGGTTGGGGCGACC-GCGGACAAA--AAAGAAACCCCCGCA-CGGAA  
 Clja TGCCCCTG TGTCTTAGGTTGGGGCGACC-ACGGGC TAT--TAGATAACCCCCATG-TAGAA  
 Ogcy CCCTTCTG TGCCTTTGGTTGGGGCGACC-GCGGGGACA--AAAATAACCCCCATG-TGGAA  
 Plna TTTTCTAA TGTCTTTGGTTGGGGCGACC-ATGGAC AAT--CATAAAGCCTCCACG-CGGAA  
 Lema TTATTCCA TGTCTTTGGTTGGGGCGACC-GCGGGGAAA--TAAAAAACCCCCACG-TGGAC  
 Etzo TGTCTAA TGTCTTTGGTTGGGGCGACC-GCGGGGAAA--CAAAAAACCCCCACG-TGGAA  
 Apse TGCCCGAC TGTCTTTGGTTGGGGCGACC-ACGGACAAA--AAGTAAACCCCCGTG-TGGAA  
 Epde TGTCCGCA TGTCTTTGGTTGGGGCGACC-GCGGGGAAA--CATAGAACCCCCACG-TGGAA  
 Slja TGCCCTAA TGTCTTCGGTTGGGGTGACC-GTGGGGGAA--AACAGAGCCCCCATG-CGGAA  
 Bsja CGCCCTAA TGTCTTTGGTTGGGGCGACC-GCGGGGTAG--TACAAAACCTCCGCG-TGGAA  
 Ecna TATTTTTA TATCTTCGGTTGGGGCGACC-ATGGAC AAT-ATA-AAACCCCCACG-TGGAA  
 Cohi TACCCTA TATCTTCGGTTGGGGCGACA-ATGGGGAAA--TAAAAATCCCCATG-CGGAA  
 Caar TGTCTAA TGTCTTCGGTTGGGGCGACC-ATGGGG AAG--CACAAAACCCCCATG-CGGAA  
 Came TGTCTAA TGTCTTCGGTTGGGGCGACC-ATGGGG CAG--CACAAAACCCCCATG-TGGAT  
 Mema CTGCCCTC TGTCTTCGGTTGGGGCGACC-ATGGGG AAAC-AAA-AAACCCCCACG-TGGAC  
 Lenu TGTTCAAA TGTCTTTGGTTGGGGCGACC-ACGGACCAT--CAAAAAACCCCCGCG-TGGAA  
 Brja TACCCCC TGTCTTTGGTTGGGGCGACC-ACGGGGAAA--CAAAGAACCCCCATG-TGGAA  
 Plma TGCCCTA TGTCTTTGGTTGGGGCGACC-GCGGGGAAA--TAAAAAACCCCCACG-TGGAA  
 Emst TGCCCTAA TGTCTTTGGTTGGGGCGACC-GCGGGGAAA--CACAAAACCCCCACG-TGGAA  
 Ptti TGCCCTAA TGTCTTTGGTTGGGGCGACC-GCGGGGAAA--CACAAAACCCCCACG-TGGAA  
 Losu TGTCTAA TACCTTTGGTTGGGGCGACC-ATGGGG AA--TAAGAACCCCCCACG-TGGAC  
 Geoy TGTCCAA TGTCTTTGGTTGGGGCGACC-CTGGGG AAC--AA-AAATCCCCATG--AAGA  
 Dipi TGTCTAA TGTCTTCGGTTGGGGCGACC-GCGGGGAAA--CACAAAACCCCCACG-TGGAA  
 Pama TGCCCTAA TGTCTTTGGTTGGGGCGACC-GCGGGG AAAT-ACA-AAACCCCCATG-TGGAG  
 Leob TACCCTAA TGTCTTTGGTTGGGGCGACC-GTGGGG-CA--CACAAAACCCCCACG-TGGAG  
 Neba AATCCGAC TATCTTTGGTTGGGGCGACC-GCGGGG ACT--AAAAAACCCCCATG-TGGAC  
 Pdpi TGTCTCCTC CGTCTTCGGTTGGGGCGACC-ATGGGG AAC--TAAATACCCCCCACG-CGGAC  
 Nimi TGTCTAG TGTCTTTGGTTGGGGCGACC-ACGGGG AAC--TACACAACCCCCGCG-TGGAA  
 Uptr TGTCTCA TGTCTTTGGTTGGGGCGACC-GTGGGG TAA--CAAACAACCCCCATG-TGGAC  
 Pesc TATCTAC TGTCTTCGGTTGGGGCGACC-GCGGACAAA--CAAACATCCTCCACG-CGGAA  
 Baar TGCTCTGA TGCCTTAGGTTGGGGCGACC-CCGGGG AAT--AA-AAACCCCCCGCG-TGGAA  
 Moar TGCCCTAA TGTCTTTGGTTGGGGCGACC-GCGGGGAAA--TACAAAACCCCCATG-TGGAC  
 Toja TGTTTTTA TGTCTTCGGTTGGGGCGACC-ATGGGG AAG--TAAAAAACCTCCACG-TGGAA  
 Chau TGCCCTAA TGTCTTTGGTTGGGGTGACC-GCGGGG AAAT-AAA-TAACCCCCGTG-TAGAA  
 Chse TGCCCTAA TGTCTTAGGTTGGGGCGACC-GCGGGGAAA--TGAAAAACCCCCATG-TGGAA  
 Enar TGCCCTAA TGTCTTTGGTTGGGGCGACC-GCGGGGAAA--CAAAAAACCCCCATG-TGGAA  
 Hpty TGCCAAA TGTCTTTGGTTGGGGCGACC-GCGGGGAAA--CATAAACCCCCACG-TGGAA  
 Nana TGTCTAA TGTCTTTGGTTGGGGCGACC-GCGGGGAAA--CAAAAAACCCCCACG-TGGAA  
 Mcst TGCCCTAA TGTCTTCGGTTGGGGCGACC-GCGGGGAAA--CAAATAACCCCCATG-TGGAA  
 Rhox TGCCCTAA TGTCTTTGGTTGGGGCGACC-ACGAGGAAA--A--AGAACCCCCGTG-CGGAC  
 Opfa TGCCCTAA TGTCTTTGGTTGGGGCGACC-GTGGGG AAAC-AAA-AAACCCCCATG-TGGAA  
 Paar TGCCCTAA TGTCTTTGGTTGGGGCGACC-GCGGGGAAA--TAGAGAACCCCCACG-TGGAA  
 Gozo TATTCCAA TGTCTTTGGTTGGGGCGACC-GCGGGG AAAC-AAA-AAACCCCCACG-TGGAA  
 Ackr TGCCCTAA TGTCTTTGGTTGGGGCGACC-CCGGACCA--CAAAAACCCTCCGCG-TGGAA  
 Elev TGTCTAAA TGTCTTTGGTTGGGGCGACC-GCGGGGAAA--TAAAAAACCCCCATG-AGGAC  
 Trdu TGTCTAA TGTCTTTGGTTGGGGCGACC-GCGGGGAAA--CAAAAAACCCCCATG-TGGAC  
 Amoc TGATATAA TGTCTTCGGTTGGGGCGACC-TCGGGG AAAG-AAA-AAACCCCCACG-CGGAG  
 Hame TGCCCTAA TGTCTTCGGTTGGGGCGACC-CCGGGGAAA--TAAGTAACCCCCATG-AGGAC  
 Chso TGTCTAT TGTCTTTGGTTGGGGCGACC-ACGGGG CAA--CAAAAAACCCCCGCG-CGGAA  
 Lyto TGCCCGAA TGTCTTTGGTTGGGGCGACC-GCGGGG CAT--TGAAAAACCCCCACG-TGGAA

|      |          |       |     |       |     |       |     |      |        |    |          |          |      |     |       |       |
|------|----------|-------|-----|-------|-----|-------|-----|------|--------|----|----------|----------|------|-----|-------|-------|
| Encr | TGTCCTAA | TGTCT | TT  | GGTTG | GGG | CGACC | -GC | GGGC | AAT    | -  | TAGAAAAC | CCCC     | ACG  | -   | TGGAA |       |
| Bvar | TGCCCTTA | TGTCT | TC  | GGTTG | GGG | CGACC | -GC | GGGC | TAA    | -  | AAATTAAC | CCCC     | ACG  | -   | TGGAA |       |
| Noco | TACCCCGA | TGTCT | TTT | GGTTG | GGG | CGACC | -GC | GGGC | AAA    | -  | GAAAAAAC | CCCC     | ACG  | -   | TAGAA |       |
| Chsp | TTTCCTCA | TATCT | TT  | GGTTG | GGG | CGACC | -AT | GGGC | AAA    | -  | CAAACAAC | CCCC     | GTA  | -   | TGGAT |       |
| Arja | TGTCCTAA | TGTCT | TTT | GGTTG | GGG | CGACC | -GC | GGGC | AAT    | -  | TAAATAAC | CCCC     | ACG  | -   | TGGAA |       |
| Pase | TATCCTAA | TGTCT | TC  | GGTTG | GGG | CGACC | -GA | GGGC | GAAC   | -  | ACT      | TAAC     | CCCC | ATG | -     | CAGAA |
| Trel | TGCTCGAA | TGTCT | TC  | GGTTG | GGG | CGACC | -AC | GGAC | AAA    | -  | CAAGAAAC | CCCC     | GTA  | -   | TGGA  |       |
| Lifa | CTATTTAA | CGTCT | TG  | GGTTG | GGG | CGACC | -AA | GGGC | AAA    | -  | AGAAAAAC | CCCC     | TTG  | -   | CGGAA |       |
| Acur | GTTTTACT | TGCC  | TTT | GGTTG | GGG | CGACC | -GC | GGGC | AAAT   | -  | AAA      | AAAC     | CCCC | ATG | -     | AGGAT |
| Ampe | TGCCCTAG | TGTCT | TTT | GGTTG | GGG | CGACC | -GC | GGGC | AAA    | -  | CATAAAC  | CCCC     | ATG  | -   | TGGAA |       |
| Urja | TGCCTTAG | TATCT | TC  | GGTTG | GGG | CGACC | -CC | GAGC | AAC    | -  | AAAAAAC  | CCCC     | GGG  | -   | TGGAC |       |
| Enet | TGCCTTAT | TGTCT | TTT | GGTTG | GGG | CGACC | -GC | GGAC | TAA    | -  | CATTAAC  | GTCC     | ACG  | -   | AGGAC |       |
| Ptbr | TTTTGAAC | TGTCT | TC  | GGTTG | GGG | CGACC | -GC | GGGC | AAA    | -  | AATTTAAC | CCCC     | ATG  | -   | AGGAA |       |
| Safa | CCGTTTCA | TGTCT | TC  | GGTTG | GGG | CGACC | -GC | GGGC | AAA    | -  | TAAAAAAC | CCCC     | ATG  | -   | TGGAA |       |
| Icae | TGCCCGTA | TGTCT | TTT | GGTTG | GGG | CGACC | -GC | GGGC | AAA    | -  | TAAAAAAC | CCCC     | ACG  | -   | TGGAC |       |
| Asmi | CTCTCCAC | TGTTT | TC  | GGTTG | GGG | CGACC | -GC | GGTC | TAC    | -  | TAAATAAC | CCCC     | GCG  | -   | AGGAC |       |
| Foal | CCTTAAAA | TGTTT | TTT | GGTTG | GGG | CGACC | -TT | GGGA | AAA    | -  | CAAGCAAC | TCCC     | ATG  | -   | TCGAG |       |
| Drze | TACTTAGA | TATCT | TTT | GGTTG | GGG | CGACC | -CT | GGGC | AAA    | -  | AAAAGAAC | CCCC     | ATG  | -   | TGGAC |       |
| Rhas | TGTCCCC  | TGTCT | TTT | GGTTG | GGG | CGACC | -GC | GGGC | AAA    | -  | CAAAAAAC | CCCC     | ACG  | -   | TGGAA |       |
| Elac | TGTTCTCC | TGTCT | TC  | GGTTG | GGG | CGACC | -GC | GGGC | -      | AA | -        | CAAAAATC | CCCC | ACG | -     | TGGAA |
| Kugu | CTGTCCAA | TGTCT | TTT | GGTTG | GGG | CGACC | -GC | GGGC | AAA    | -  | CAAAAAAC | CCCC     | ACG  | -   | TGGAA |       |
| Plor | CTGCCAGA | TGTCT | TTT | GGTTG | GGG | CGACC | -AC | GGGC | AA     | -  | -        | CACGAAAC | CCCC | GCG | -     | CGGAA |
| Sgun | TGCCCTAA | TGTCT | TTT | GGTTG | GGG | CGACC | -GC | GGGC | AAA    | -  | CACAAAAC | CCCC     | ACG  | -   | TGGAA |       |
| Zaco | TGTCCTAA | TATCT | TTT | GGTTG | GGG | CGACC | -GC | GGGC | AAA    | -  | TACAAAAC | CCCC     | ATG  | -   | TGGAA |       |
| Zbfl | GCCCTATA | TGTCT | TTT | GGTTG | GGG | CGACC | -GC | GGGC | AAA    | -  | TACAAAAC | CCCC     | ACG  | -   | TGGAA |       |
| Spba | TGTTTTTA | TGCC  | TC  | GGTTG | GGG | CGACC | -AT | GGAC | TAA    | -  | TAAAAATC | GTCC     | AAG  | -   | TGAGA |       |
| Game | TGCCCTTA | TGTCT | TTT | GGTTG | GGG | CGACC | -GC | GGGC | AAAT   | -  | AAA      | AAAC     | CCCC | ACG | -     | TGGAA |
| Thth | TGCCCCCA | TGTCT | TTT | GGTTG | GGG | CGACC | -GC | GGGC | AAA    | -  | TAAAAAAC | CCCC     | ACG  | -   | TGGAA |       |
| Xigl | TGCTTTAA | TGTCT | TC  | GGTTG | GGG | CGACC | -AT | GGGC | AAA    | -  | TAAAAAAC | CCCC     | ACG  | -   | CGGAC |       |
| Hyja | TGCCCTA  | TGTCT | TC  | GGTTG | GGG | CGACC | -AC | GGGC | AAA    | -  | TAAAGAAC | CCCC     | GCG  | -   | TGGAA |       |
| Psan | TGCCCTA  | TGTCT | TC  | GGTTG | GGG | CGACC | -AC | GGGC | AAA    | -  | TAAAAAAC | CCCC     | GCG  | -   | TGGAG |       |
| Cupa | TACTCCTA | TGTCT | TTT | GGTTG | GGG | CGACC | -GC | GGGC | AAA    | -  | TAAAAAAC | CCCC     | ATG  | -   | TGGAA |       |
| Mpch | TGTCCTAA | TGTCT | TTT | GGTTG | GGG | CGACC | -GC | GGGC | AAA    | -  | CAAACAAC | CCCC     | ACG  | -   | TGGAC |       |
| Char | TACTCCCC | TGTCT | TTT | GGTTG | GGG | CGACC | -GC | GGGC | AA     | -  | -        | TACAAAAC | CCCC | ATG | -     | TGGAA |
| Pser | TGCTCCA  | TGTCT | TC  | GGTTG | GGG | CGACC | -GT | GAGC | AAATTA | -  | AAAAAAC  | GTCC     | ACG  | -   | TGGAA |       |
| Prol | AGCCCTGA | TGTCT | TC  | GGTTG | GGG | CGACC | -AT | GGGC | -      | AA | -        | CACAAAAC | CCCC | ACG | -     | TGGAA |
| Plbi | TGCCTTGA | TGTCT | TC  | GGTTG | GGG | CGACC | -AT | GGGC | -      | AA | -        | TACAAAAC | CCCC | ACG | -     | TGGAA |
| Calu | TGCCCTAG | TGTCT | TA  | GGTTG | GGG | CGACC | -AT | GGGC | AA     | -  | -        | CACCCAAC | CCCC | ATG | -     | AGGAC |
| Papa | CGTCCCAC | TGTCT | TC  | GGTTG | GGG | CGACC | -TT | GGGC | TAA    | -  | TATATAAC | CCCC     | ACA  | -   | TGGAA |       |
| Sufr | TGTCCTAA | TGCC  | TTT | GGTTG | GGG | CGACC | -GC | GGGC | AAA    | -  | CAAAAAAC | CCCC     | ATG  | -   | TGGAA |       |
| Stci | AGTTTGA  | TGCC  | TTT | GGTTG | GGG | CGACC | -GC | GGGC | AAA    | -  | CAAAAAAC | CCCC     | ACG  | -   | TGGAC |       |
| Taru | TGTTTTAA | TGTCT | TTT | GGTTG | GGG | CGACC | -GC | GGGC | TAA    | -  | CAAAAAAC | CCCC     | ATG  | -   | TGGAA |       |
| Rala | TACCCTAA | TGTCT | TTT | GGTTG | GGG | CGACC | -GC | GGGC | AAA    | -  | TAAAAAAC | CCCC     | ATG  | -   | TGGAC |       |

\*\*      \*      \*      \*      \*      \*

|      | HVR                                    |  |
|------|----------------------------------------|--|
| Scca | --CGAGTATTCAAA-----TAC-----            |  |
| Muma | --TGAGTA-CTCAGTAC-----TTG-----         |  |
| Erca | --TGAAGCACAG-----CTTT-----             |  |
| Pose | --TGAAGCACAGC-----TTT-----             |  |
| Actr | --CGGGGGCACTGC-----CCC-----            |  |
| Scal | --CGGGGGCACTG-----CCCC-----            |  |
| Posp | --CGGGGGCACTG-----CCCC-----            |  |
| Atsp | --CTGGAGA-----TAGCCTCT                 |  |
| Leoc | --TGGAGATA-----ACCTCTA-A----           |  |
| Amca | --TAGGAA-TACTTTAA-----TATAATTCCTAA---- |  |
| Osbi | --ACTCGGGGAATAG-----TCAAACAA           |  |
| Pabu | --TTAAGATTAATTATCTTAA-----AGA----      |  |
| Hial | --TGAGGGCCAAGCC--CTTAAA-----           |  |
| Elha | --CGGGGGGACTATTACTACC-----CCTAAA----   |  |
| Mlcy | --CAAGGACA--CAGTCCT-----CAAA----       |  |
| Algl | --TGGGGTAATATTCCTAA-----A----          |  |
| Ptgi | --TGAACAA-----CCCC-----                |  |
| Alaf | --TGGGGGCA--CACCCCT-----AAA----        |  |
| Nock | --TGGGGTTTATAA-----TTTACCCTAAA----     |  |
| Anja | --CAGGGAC-----TAA-TCCCTAA----          |  |
| Gyki | --CGGGAACCC-----TTAA-----              |  |
| Syka | --TGGGGA-----TATC-----CCCTAA----       |  |
| Opma | --CGAAAA--CATC-----TTCCTA-A----        |  |
| Comy | --TGGGTA-AAATTA-----TCCTAA----         |  |
| Sasp | --AAAGAATATAAGACTAA-----TCTTA----      |  |
| Eupe | --AAGGA---TAAACTCCT-----A----          |  |
| Enja | --CGGGAA-----AAC-----CCT-----          |  |
| Same | --TGGGGGAC-----ACCCT-----              |  |
| Chch | --TGAA-C-----AAACCATT-----TA-----      |  |
| Grgr | --TGGGG--CAACCCTAG-----                |  |
| Caau | --CGGGAG-AAT-----TTCCT-----            |  |
| Cyca | --TGGGAAAACC-----T--CCT-----           |  |
| Dare | --CGGG--CACAGC--CCTAAA-----            |  |
| Cost | --TGGGT-TAACAA-----A-CCT-----          |  |
| Leec | --TGGGATAA-----A--TCC--T-----          |  |
| CrIa | --TGAGCCAACA-----AG--CTT-----          |  |
| Clmc | --TGGGAAA-----ACTCCT-----              |  |
| Phin | --TAG---ACC-----ATTCTCT-----           |  |
| Icpu | --TGGGGC--AA-TCCCCCTAA-----            |  |
| Psto | --CGGGATAACA-----TCCTA-----            |  |
| Cora | --TGAGG--ACTA--ACCT-----TA-----        |  |
| Eisp | --TGGGGCTATCGC-----CCC-----            |  |
| Apal | --TAGGAA-AAATA-----TTCC-T-----         |  |
| EsLu | --TAAGGAAAAC-----CT--CCTT-----         |  |
| Dape | --TGAGGGTAATA--CCCTT-----              |  |
| Glse | --CGGGAGAAC-----CCTACTCCT-----         |  |
| Naar | --TGGGAAAACCTT--TCCTACA-----           |  |
| Baoc | --TGGAAAACCTTTTCCAC-----               |  |
| Opso | --TAGGAAAACCC-----TTCCC-----           |  |
| Alte | --CGGGATTATTCCT-----                   |  |
| Plap | --CGGGATATC-----CC-----                |  |



|      |                                                   |
|------|---------------------------------------------------|
| Plal | --CAGGGTCACAGACC-----CC-----                      |
| Sami | --CAAGGTTACGAA-----C-CTCA-----                    |
| Rere | --TGAAGTAACTACCCTT-----CA-----                    |
| Gama | --CGGGAGGAAATA-----CTCCTA-----                    |
| Onmy | -CTGGGGGGCACTGCCCCA-----C-----                    |
| Sasa | -CTGGGGGCACTG-----CCA-----                        |
| Cola | --TGGGGGCACTG----CCCC-----C--AC-----              |
| Dita | --TGGGAG-CACA-----CATCCTAG-----                   |
| Gogr | --TGAGGG--CACTGCCCCCA-----                        |
| Chsl | --TAGG-GCTTCTA-----CCC-----                       |
| Atja | --TAGGAA-AACC-----TTCCTAA-----                    |
| lido | --CAGGAAA--ATCTTCCTA-----A-----                   |
| Auja | --CGAGGACAC---CTC-CTT-----AA-----                 |
| Chag | --CTGGGGCGACCCCCC-----AT-----                     |
| Hami | --CGGAATAAACATTCC-A-----A-----                    |
| Saun | --CGGGAAAAC-----CTTCCCAA-----                     |
| Nema | --CGGGGCTACACACC-----CTAA-----                    |
| Disp | --CAGGGCTACCATA-----GCCTTA-----                   |
| Myaf | --CGGGGCCACTCAGCCCTA-----                         |
| Lagu | --CGAGAG-----ACCTCTCTTA-----                      |
| Trtr | --TGGGTA-----CCCCCTA-----                         |
| Zucr | --AGGGGGTAACC---CC-----TA-----                    |
| Pxja | --CGGGAATACT-----AATTCCTAC-----                   |
| Pxlo | --CGGGA-----ATACTAA--TTCCTAC-----                 |
| Pctr | --TAGAGA-AACAT-----CTC--TA-----                   |
| Apsa | --TAGGA--CAT-----CTCCTT-----                      |
| Cabe | --TGGAGTACA-----CTC--CA-----                      |
| Bzze | --TGGGAGTAC-----CCCTCCTA-----                     |
| Siim | --TGGAAATAAA-----GCACTTATTCCT-----                |
| Ctru | --CGGGGACAC--TATTCACC-----A-----                  |
| Dpbr | --TGGAAAG-----TACCACC-----TCCCA-----              |
| Caki | --CAGGGACATAAC-----CCTA-----                      |
| Phja | --TGGGGAT--ACT--ATCCCTAA-----                     |
| Brsp | --GGGGCCTCTA-----TAAG-----                        |
| Gamo | --CGGGGATATTA--TCCCTAATA-----                     |
| Lolo | --CGGGGATATTAT-----CCCTA-----                     |
| Batr | --TGGTA-----CACACACC-----                         |
| Prmy | --TAGAATAACCTT-----                               |
| Loli | --TGGGAGT--A-----CCTCTC-----                      |
| Loam | --AGGGAACACCCT-----T--CCT-----                    |
| Chab | --TGGAAACAGACCCTTTTC-----TAC-----                 |
| Chto | --TGGAAACAGACCCTTTTCTAC-----                      |
| Majo | --CGGGAGTACCC-----CTCCTAC-----                    |
| Hlst | --TGGGGACACCTCC-CCTA-----C-----                   |
| Clpe | --TGAAAG-CACAC-----CTTATTC-----                   |
| Mlmr | --CAAGGACAAACC-----TCCAC-----                     |
| Crcr | --TGAGAGCACATATTCACAC-----TCATTAATACTG-----       |
| Muce | --TGAGAGCACATACT-CACACTTATCAATACCGC-----TTCT----- |
| Bege | --TGAGAGTACTTCTC-----CC-----                      |
| Mela | --TAGGAGAACC-----CTCCCA-----                      |
| Hats | --TGGAAACCACAC-----ACACACCT-----                  |
| Orla | --AGAGAAAACCCCTATT-----CTT-----                   |

Cosa --AAAGAG-CACTTT-----CTCTT-----  
Exsp --CAGGAG-AACTTT-----TCTCCC-----  
Depa --TAAGAGAATC-TTCT-----CTT-----  
Rima --CAAAACACCATGTTTTTAT-----  
Fuol --TAAAAGCACAAT-----CTTTTA---A-  
Gmaf --TGAAGACACT-----CTAGCTTCA---T-  
Xeei --AAGAAA-CACCTT-----ATGTTTCCA---A-  
Pros --CAGAAGAA---CTTCTTCCAC-----  
Scmi --CAGAAAACAC-----TCCTTCCA---C-  
Rolo --TGAG-AGAACTT-----CTCCCA---C-  
Cere --TGAGAGAAC-----CTCTCCA---A-  
Daga --CGAGAGAACATCTC-TT-----TA---A-  
Anco --AAGGAGGA-----CTCCTCCT-----  
Dmve --AAGGAAT--A-----GCCCTCCTA-----  
Dmar --AAAGGAGTAACCCTCCTA-----  
Anka --AAGGAGG-AC-----TCCTCCTA-----  
Moja --AGGGAA-----GACTACCC-----TCCTA-----  
Hoja --AAGGAG-----GACACC-----TCCTA-----  
Bede --TGGAAG-AACTT-----CTTCT-----  
Besp --CGGAAG-AACTTC-----TTC-----  
Mysp --TGGGAG-AACA-----TCCCC-----  
Osja --CAGGGAG-----ACCCTC-----CCC-----  
Sgro --TGAGAGCA---CCCCTCT-----TAC-----  
Pzpa --TAGAAGTTT-----ATACTCCTAT-----  
Zeja --TGGAAGCAC--AAGCCACC-----CA-----  
Zzne --TGAGAGTTCAACTCCTAA-----  
Zefa --TGAGAG-TTCTAC-----TCCTAA-----  
Acni --TGAGAGTTT-----TACTCCTAA-----  
Ncrh --TGAGAGTTTTA-----CTCCTAA-----  
Agca --AGGGAACAC---CCTTCCT-----AC-----  
Hydy --TGGGAGTA-----C-CCCCTCCTGC-----  
Gsac --TGGGAGCAC---CCCTCCT-----AC-----  
Pevo --CGGAAACAC-----CT--TTCTAC-----  
Hiku --TGAGGT-----AAAAACCT-----TAC-----  
Inpa --TAAAACACCAGTTTTAC-----  
Auch --TGGGAGCAACTTTCTCATACGTAC-----ATATTCTCTCATCCTCC-----  
Fico --TGGGAG-TAC---TT-----CTCCCA-----  
MacS --TGGGGGCACTTG-CCCCT-----A-----  
Moal --TAGGAAGAC---TCTTCC-----A-----  
Syma --TAGAAGTACTC-----CTTCTCA-----  
Mafr --TAAGAG-GACAT-----CCTCT-----  
Dcpe --AGGGAG--TAA-----ACTCC-----  
Dcti --AGGGAGTAACA-----CTCC-----  
Hehi --AGGGAGCACCC-----CTCC-----  
Stam --TGGGAGAAC-----CCCTCCTAA-----  
Hogi --TGAAAGTAAGA-----TACTTTTAC-----  
Erzo --TGGGAGCACCA---TCCT-----CCTAC-----  
Hxot --TGGGA--ACAC---CCCT-----CCTAC-----  
Core --CGGGA---ACACTTTTCCTAC-----  
Apve --CGGGAGAACC-----CCCTCCTAC-----  
Latj --TGGGAGCACTACAACCCACTATTATT-----TCTTCCCCTCCTGC-----  
Laja --TGGGAACACCT-----CCTAC-----

Syja --AGGGAGCACCCCTCCCCCTTA-----TACTCCTCCTAC----  
 Epme --CGAATGTACTACATTC-----AC-----  
 Grse --TAGGTACACTC-----ATACCAC  
 Clja --TGGGAAA--ACTGACTGCCTAA-----  
 Ogcy --GGGAAGATTAACCTCCTGA-----  
 Plna --TGGGAT-CAA-----ACCTTTCTAC----  
 Lema --TGAATTA--TGCTATTC-----CAC-----  
 Etzo --CGGGAG--AACTTCCTCCTAC-----  
 Apse --CAGGGATAGC-----CC--CCCTTA----  
 Epde --TGGGAGCACC-----CCTCCTAC----  
 Slja --AGGACC-----ACCGTGTCT-----CTG--  
 Bsja --CGAGAG-GACTTCC-----CTCTTAC----  
 Ecna --TAAGAGAATAACCCATAAT-----CAACCCTCTTAAA----  
 Cohi --CGGGAAAATTT-----TATCTAAGAAAT-  
 Caar --TAGGAGGACAACCCACTATCTTCCCCCTCC-----TCCCA----  
 Came --TGGGAGAACAACCCAAAACCCTTTTCC-----CACACTCCCA----  
 Mema --TGGGGACACATACCTCCC-----ACCCCTCCCA----  
 Lenu --CAGAAA-----CACACACCGT-----TTCTG----  
 Brja --GGGGAG-CACTG-----CTCC-TA-----  
 Plma --TGGGAGCACT-----GCTTCCTA----  
 Emst --TGGGAACACCCCTCCTA-----  
 Ptti --TGAGAA-CACCTC-----CTCTCA----  
 Losu --TGGAGA-CCTACATCATCTTTTAACCAA-----AGTCTAATA----  
 Geoy --CAGGGAG-----AACATTTTTACTACTCCTA----  
 Dipi --AGGGAGCACAACCT-----CCTA----  
 Pama --TAGGAATACA-----CATTCCTA----  
 Leob --CAGGAG-CACAATA-----CTCCCA----  
 Neba --CGAGAATAAAAGTTTTTCTTATT-----CTTA----  
 Pdpi --TGGGAGCTTAATCCCATATTTCTTTCTTT-----CTCCGCTCCCA----  
 Nimi --TGAAGCATTT-----TGCTGCCA  
 Uptr --AGGGAGGACT-----CC--TCCTA----  
 Pesc --TAAGAGCACT-ACT-----CTTA----  
 Baar --CTGGACCACCT-----TATCCCTT-  
 Moar --TGGGAATACCCCT-----CCTA----  
 Toja --TAGGAGCATTCAACCCTTTTCTCTAAC-----CCTCCTCCCA----  
 Chau --AGAGGGCTCACTCCCTC-----T-----  
 Chse --CGGGAGCAC-----CCCTCCCA----  
 Enar --TGAGAACA-----C-CCTCT--TA-----  
 Hpty --TGGGAACACCCACT-----CCTA----  
 Nana --CGGAGACACC-TTC-----CCCT-----  
 Mcst --TAGAGACACCCTCTCCTA-----  
 Rhox --TGGGGG-CATACC-----CCCCTA----  
 Opfa --TGGGAAAACC-----CTTTCCCTA----  
 Paar --TAGGA-----TTATTT---TCCTT-----  
 Gozo --TGGGAGTACTACTCCTA-----  
 Ackr --TGAGAAAAA--CTTCTT-----A-----  
 Elev --TGGAAACACTTTTC-----C-A-----  
 Trdu --CGGGAGCACA-----CTGCCCA----  
 Amoc --CAGAAGTACCATACTTC-----C-----  
 Hame --TGAAG-CA-TGC-----TTCCA----  
 Chso --CAGAAA-CATTG-----TTTCCA----  
 Lyto --TGGG-AGCACCC-----CTCCT-----

|      |                                                              |
|------|--------------------------------------------------------------|
| Encr | --TGGGAG-CACC-C-----CTCCTAC----                              |
| Bvar | --CGGGGTATATACACCCCC-----CG----                              |
| Noco | --CAGGAGTACAACCTCCTTA-----                                   |
| Chsp | --TGGGAGAA-AAATCTCTCCTAC-----                                |
| Arja | --TGGGAG-AACC-----CCTCCTAC----                               |
| Pase | --GTGAAGGCC-----TCCTTCCAA----                                |
| Trel | ---GGGGA-----AAACTTCC-----TCA----                            |
| Lifa | --TGAAG-CTTTTT-----ACACCAATAAT-                              |
| Acur | ---AGGAAGTATTACTTCT-----AC----                               |
| Ampe | --TGGGAGCACCTCT-C-----CTAC----                               |
| Urja | --TGGGACAGC-----ACACCCTAA----                                |
| Enet | --TGGAACTCT-TCCATTCT-----AC----                              |
| Ptbr | --TGAGGAC-----TTCATC-----CTCC----                            |
| Safa | --C---AT-----CATCACCTGT-----TTTT----                         |
| Icae | --TGGGAGCACTGCCT-----CCTA----                                |
| Asmi | --AGAAACCA--CTGTTTTT-----A----                               |
| Foal | --AAAGAA--CTAA--TCTTT-----CA----                             |
| Drze | --TGGGA-TACTTT-----CCTA----                                  |
| Rhas | --CAGGGAT--ACC--CC-----CCTT----                              |
| Elac | --TGGGAACAACCT-----CCCT----                                  |
| Kugu | --TAAGAG-----TACTCCTCTTT-----                                |
| Plor | --CGGAAGCA--CCTCCTTC-----TA----                              |
| Sgun | --TGGG-ACTACCCG-----TCCTA----                                |
| Zaco | --TGGGAATACCCCT-----CCT----                                  |
| Zbfl | --TGGGAACACCCC-----TCCT----                                  |
| Spba | -GGGAGCACTTCACCCTTTTCTACCTCTACATCCACCCTTATCTAACCCCTCT-----   |
| Game | --TGGGAGCACTAC-CTCTC-----                                    |
| Thth | --TGGGAGTACTAC-----CTCCT-----                                |
| Xigl | --TGGGAGCACTAAACCCC--TTCTTTACC-----TCTCCTCCC-----            |
| Hyja | --TGGGAGCACTGA-----CTCCT-----                                |
| Psan | --TGGGAGTACAACCTTCTG-----                                    |
| Cupa | --TAGGGGC-----ACTGCCCTA-----                                 |
| Mpch | --CGAGAGCA-----T-ACTCT--TA-----                              |
| Char | --TGGGAGAACCC-----CTCCTG-----                                |
| Pser | --TGGGAGCAACAATCCCTCGAAGATCTTTCTCT-----TC--TTTGTCTCCCAC----- |
| Prol | --AAGGAGTACACC--CCTACATTCTCT-----CCTCC--TAC-----             |
| PIbi | --AGGGAGCACACCCCTAAGTTACTT-----CTTCTCCCGC-----               |
| Calu | --CGGGAGCACTGCAGGGAAAATCCCCAGCCT-----TTGACCACCCTCCTA-----    |
| Papa | --T-GAAGC--ATTTACCCACCAC-----ACCTGTCATCCA-----               |
| Sufr | --TGGGACCACCCGTCCTC-----                                     |
| Stci | --TGGGACCCTACG-TCCTA-----A-----                              |
| Taru | --TGAAAACACC-----                                            |
| Rala | --TGAGAG-----CACCCC-----TCTTA-----                           |

|      | HVR       | :          | 47     | D   | 47' | :     | HVR      | :        |
|------|-----------|------------|--------|-----|-----|-------|----------|----------|
| Scca | ----      | TTAAAAGTTA | GAATTA | CAA | TTC | TAACC | -GATAAA- | -----A-A |
| Muma | -----     | AAAATCA    | GAATAA | CAA | TTC | TGATT | -AATAAA- | -----A-T |
| Erca | A-----    | ATTAACTA   | GAATGA | CAA | TTC | TAAGT | -ATCAGG- | -----A-T |
| Pose | ----      | ATA-AGTTAA | GAATGA | CAA | TTC | AACAC | -ATCAGG- | -----A-C |
| Actr | -----     | TAAACCTA   | GGCGA  | CAG | CCC | AAAGC | -AACAGA- | -----A-- |
| Scal | -----     | TAAACCTA   | GGCGA  | CAG | CCC | AAAGC | -AACAGA- | -----A-C |
| Posp | -----     | TAAACCTA   | GGCGA  | CAG | CCC | AAAGC | -AACAGA- | -----A-T |
| Atsp | A-----    | AAACCAA    | GAGCAA | CAA | CTC | TAAGT | -AACAG-  | -----AAA |
| Leoc | -----     | AACCAA     | GAGCAA | CAA | CTC | TAAGT | -AACAGA- | -----A   |
| Amca | -----     | AACTAA     | GAGCCA | CCA | CTC | TAAGT | -AACAGG- | -----A-C |
| Osbi | TCCCTAAGA | ACCAA      | GAACCA | CAA | TTC | CAAGT | -AACAG-  | -----AAA |
| Pabu | -----     | ACCGA      | GAGCTA | CTG | CTC | TAAGC | -AACAGA- | -----A-A |
| Hial | -----     | GCCAA      | GAGACA | CAA | CTC | TAAGC | -AACAGA- | -----C-A |
| Elha | -----     | GCCAA      | GAGACA | CAC | CTC | TAAGC | -AACAGA- | -----A-- |
| Mlcy | -----     | ACCAA      | GAGACA | CAA | CTC | CAAGC | -AGCAGA- | -----A   |
| Algl | -----     | GCTGA      | GAGCTA | CAG | CTC | TAAGA | -AGCAGA- | -----A-- |
| Ptgi | -----     | TAAACTAA   | GAGAAA | CAC | CTC | TAAGT | -AACAGA- | -----A-C |
| Alaf | -----     | ACTGA      | GATACA | CAA | ATC | TAAGT | -AACAAA- | -----A-- |
| Nock | -----     | ACTAA      | GAAATA | CAA | ATC | TAAGT | -AGCAA-  | -----A-- |
| Anja | -----     | GCCAA      | GAGAGA | CAT | CTC | TAAGC | -AACAGA- | -----AAA |
| Gyki | -----     | GCTAA      | GACAAA | CAA | GTC | TAAGT | -ATCAGA- | -----A   |
| Syka | -----     | ACCAA      | GAAAGA | CAA | TTC | TAAGT | -AACAGA- | -----A-C |
| Opma | -----     | ACCAA      | GAGACA | CAT | TTC | CAAGT | -AACAGA- | -----A-A |
| Comy | -----     | GCCAA      | GAAAAA | CAA | TTC | TAAGC | -AACAAA- | -----A-T |
| Sasp | -----     | AACCAA     | GAAATA | CAC | TTC | AAGGC | -AACAGA- | -----A-A |
| Eupe | -----     | AACCAA     | GAAAAA | CAC | TTC | TAAGC | -AACAGA- | -----A-- |
| Enja | -----     | TAAGCCGA   | GAATTG | CAA | CTC | TAAGC | -CGCAA-  | -----A-T |
| Same | -----     | AAAACCCA   | GAGCCA | CAG | CTC | TAAGT | -CACAAA- | -----A   |
| Chch | -----     | GAGCTAA    | GAGACA | CAT | CTC | TAAGC | -CACAGA- | -----A-C |
| Grgr | -----     | AGCCCA     | GAGAGA | CAC | CTC | TAAGC | -CACAGA- | -----C-A |
| Caau | -----     | AAAACTAA   | GAGAGA | CAT | CTC | TAAGC | -CACAGA- | -----A-C |
| Cyca | -----     | AAAACCAA   | GAGAGA | CAT | CTC | TAAGC | -CACAGA- | -----A-C |
| Dare | -----     | ACCAA      | GAGAAA | CAT | CTC | TAAGC | -CTCAGA- | -----A   |
| Cost | -----     | AAAACCAA   | GAAAGA | CAT | TTC | TAAGC | -CACAGA- | -----A-A |
| Leec | -----     | AAAACTAA   | GAGAGA | CAT | CTC | TAAGT | -CACAGA- | -----A-- |
| CrIa | -----     | AAAACTAC   | GAAAAA | CAT | TTC | TTTCT | -CTCTAT- | -----C-C |
| Clmc | -----     | AATACCAA   | GAGAGA | CAT | CTC | TAAGT | -CACAGA- | -----A-- |
| Phin | -----     | TTATCCGA   | GAGAAA | TAT | CTC | TAAGT | -CACAGA- | -----ACA |
| Icpu | -----     | AACCAA     | GAGATA | CAC | CTC | TAAGT | -CGCAGA- | -----A-T |
| Psto | -----     | AAACTAA    | GAGAGA | CAT | CTC | TAAGT | -CACAGA- | -----A-C |
| Cora | -----     | AAACCAA    | GAAAGA | CAT | TTC | TAAGT | -CACAGA- | -----A-- |
| Eisp | -----     | AAAATTA    | GAGGGA | CAC | CTC | TAAAT | -CGCAA-  | -----A-C |
| Apal | -----     | TGAACCAA   | GAGAGA | CAT | CTC | TAAGC | -CACAGA- | -----A-C |
| EsLu | -----     | ATAACCAC   | GAGCGA | CAG | CTC | TAAGT | -CTCAGA- | -----A-C |
| Dape | -----     | ATAAGCAT   | GAGCTA | CAG | CTC | TAAGC | -ATCAGA- | -----A   |
| Glse | -----     | AAAGTCAA   | GAGCCA | CAG | CTC | TAAGC | -AACAG-  | -----AAC |
| Naar | -----     | GCCAA      | GAGCTA | CAA | CTC | TAAGC | -AACAGA- | -----A   |
| Baoc | -----     | AGCCAT     | GAGTTA | CAA | CTC | TAAGC | -AACAGA- | -----A-- |
| Opso | -----     | ACAACTAA   | GAGCTA | CGG | CTC | TAAGC | -AACAGA- | -----A-T |
| Alte | -----     | AAAGCCAA   | GAGGTA | CAC | CTC | TAAGC | -CTCAGA- | -----A-- |
| Plap | -----     | TAAACCAA   | GAGGTA | CAC | CTC | CAAGC | -CTCAGA- | -----A-C |

Plal -----ACAGCTGA**GGG**CTG-**CGG****CCC**CAAGC-AACAGA-----A-A  
 Sami -----CACCTAA**GGG**CTG-**CCG****CCC**TAAGC-AACAGA-----A-A  
 Rere -----CAGCTCA**GAG**CCG-**CGG****CTC**TACGC-AACAGA-----A  
 Gama -----GAGCTAA**GAG**TTA-**CCA****CTC**TAAGC-AACAGA-----A-A  
 Onmy -----CAGCCGA**GAG**CTA-**CAG****CTC**TAAGC-ACCAGA-----A  
 Sasa -----CAACCAA**GAG**TCA-**CAA****CTC**TAAGT-ACCAG-----AAT  
 Cola -----AGCCGA**GAG**CTA-**CAG****CTC**TAAGC-ACCAGA-----A--  
 Dita -----GACTGA**GAG**TTA-**CAT****CTC**TAAGG-AACAGA-----A-C  
 Gogr -----AGCTAT**GAG**CCA-**CAG****CTC**TAAGC-AACAGA-----A-C  
 Chsl ---CCACAGCCAA**GGC**CCC-**CTA****ACC**CAAGC-AACAGA-----A-T  
 Atja -----AACTAA**GAG**CCA-**CAG****CTC**TAAGT-AACAGA-----A-C  
 lido -----AACCAA**GAG**CTA-**CAG****CTC**TAAGA-AACAGA-----A--  
 Auja -----AACCAA**GAG**CAA-**CAG****CTC**TAAGT-ACCAGA-----A--  
 Chag -----AGCCGA**GAG**CCCA**CCA****CTC**GAAGC-ATCAGA-----A  
 Hami -----AACCAA**GGG**CTA-**CCG****CCC**TAAGC-AACAGA-----A-A  
 Saun -----AACCAA**GGG**CTA-**CCG****CCC**TAAGC-AACAGA-----AAC  
 Nema -----AACCGA**GAC**CCA-**CAG****CTC**AAAGC-AGCAGA-----A-C  
 Disp -----GAACCCA**GAC**CCT-**CAA****GTC**AAATC-AACAGT-----A-C  
 Myaf -----ATACATA**GAC**CCA-**CAG****GTC**AAATC-AACAGT-----A--  
 Lagu -----GAACTAA**GAG**CCA-**CCC****CTC**CAAGC-ACCAGA-----A-C  
 Trtr -----TAATCAA**GAG**CTA-**CAG****CTC**TAAAT-ATCAGA-----A  
 Zucr -----TAATTAA**GAG**CTA-**CAG****CTC**TATAT-ATCAGG-----A  
 Pxja -----AACCTA**GAG**CTA-**CCG****CTC**TAAGT-AACAGA-----A  
 Pxlo -----AACCTA**GAG**CTA-**CCG****CTC**TAAGT-AACAGA-----A-C  
 Pctr -----AAACCCA**GAG**CCA-**CTA****CTC**CAAGT-AACAGA-----A-C  
 Apsa -----AACCTCA**GAG**CCA-**CCG****CTC**CAAGT-AACAAA-----A-C  
 Cabe -----CAGCCAA**GAC**CCG-**CTC****GTT**TAAGC-ACCAGA-----A  
 Bzze -----AAACTGA**GAG**CCG-**CAG****CTC**TAAGA-ATCAGA-----A  
 Siim -----GAGCTAA**GAG**CTA-**CCG****CTC**TAAGC-AGCAGA-----A  
 Ctru -----AATCCAA**GGG**CGA-**CAG****CCC**TAAGC-AACAGA-----A--  
 Dpbr -----AAACCAA**GAG**CCA-**CAG****CTC**TAAGC-AACAGA-----A-C  
 Caki -----ACACTAA**GAG**TCA-**CCC****CTC**TAAGT-AACAAA-----A-T  
 Phja -----CACCCA**GAG**CCT-**CCG****CTC**CAAGT-AACAGA-----A-T  
 Brsp --CCCTAAATCCC**GAT**AAT-**CAC****ATC**TAAGA-AACAGA-----ATC  
 Gamo -----CTCAGA**GCC**TTC-**TTA****CTC**CAAGT-AACAGA-----A--  
 Lolo -----ATACTCA**GAG**CCT-**CTA****CTC**CAAGT-AACAGA-----A-A  
 Batr -----TAAATCAA**GAG**CCA-**CAC****CTC**TCGTT-AATACA-----AAA  
 Prmy -----AAACAC**GAA**CAA-**CAG****TTC**TAGTT-ATCAGA-----A--  
 Loli ----CTATCACCC**GAG**CTA-**CCG****CTC**TAATGTATCAGA-----ACC  
 Loam -----ATCACCCA**GAG**CTA-**CCG****CTC**TAATT-ATCAGA-----A-T  
 Chab -----AACTGA**GAG**TAC-**CCC****CTC**TAGCT-AACAGA-----A  
 Chto -----AACTGA**GAG**TAC-**CCC****CTC**TAGCT-AACAGA-----A-T  
 Majo -----AACTGA**GAG**CTG-**CCG****CTC**TAATT-AACGGA-----A-C  
 Hlst -----AACTAC**GAA**CAA-**CCT****CTC**TAATT-AACGGA-----A--  
 Clpe -----AACTGA**GAG**CTC-**CCG****CTC**TAATT-AGCAGA-----A-T  
 Mlmr -----AAGCAA**GAG**CCC-**CCG****CTC**TAACT-AACAGA-----A  
 Crcr CTTCTCACAACCAT**GAG**CTA-**CAA****CTC**TAAAT-AACAG-----AAC  
 Muce -----CACAAACCAT**GAG**CTA-**CAG****CTC**TAAAT-AACAGA-----A-C  
 Bege -----ACAACCAA**GAG**CGA-**CAG****CTC**TAAGT-AACAGA-----A--  
 Mela -----CAACCAA**GAG**CGA-**CAG****CTC**TAAGT-AACAG-----AAC  
 Hats ---TCTACAACCGA**GAG**TTA-**CAA****CTC**TAAGC-AACAGA-----A  
 Orla -----ATAACCAA**GAG**CTT-**CCC****CTC**TAAGT-AACAGA-----A

Cosa -----ACAACCCA**GAG**TGA-**CAA****CTC**TAAGT-AACAGA-----A-C  
 Exsp -----AGAACTAA**GAC**CGA-**CAG****GTC**TAAGT-ACCAGA-----A-A  
 Depa -----ATAACCAA**GAG**TGA-**CAA****GTC**TAAGC-ATCAGA-----A-C  
 Rima -----AGCCAA**GAC**CGA-**CAG****CTC**TAAGC-ACCAGA-----A-T  
 Fuol -----AACCAA**GAG**CTA-**CAG****CTC**TAAGT-AACAGA-----A-C  
 Gmaf -----AATAAA**GAG**CCG-**CAG****CTC**ACAAA-ACCAGA-----A-C  
 Xeei -----ACCCAA**GAG**CCA-**CAG****CTC**TAAGT-AGCAGA-----A-T  
 Pros -----AACCAA**GGG**CCC-**CCG****CTC**TAAGT-AACAGA-----A-C  
 Scmi -----AACCAA**GAG**CCC-**CCG****CTC**TAAGT-AACAGA-----A--  
 Rolo -----AACCAA**GAG**CCG-**CCA****CTC**TAAGT-AACAGA-----A-C  
 Cere -----AACCAA**GAG**TCA-**CCA****CTC**TAAGT-AACAGA-----A  
 Daga -----AGCCGA**GAA**CCC-**CAG****TTC**TAGGC-AACAGA-----A-T  
 Anco -----ACAACCAA**GAG**CCA-**CTG****CTC**TAAGT-AACAG-----AAT  
 Dmve -----CAACCAA**GAG**TCA-**CCA****CTC**TAAGC-AACAGA-----AAT  
 Dmar -----CAACCAA**GAG**CCA-**CCA****CTC**TAAGT-AACAGA-----A--  
 Anka -----CAACCAA**GAG**CCA-**CTA****CTC**TAAGC-AACAGA-----A--  
 Moja -----CAGCCAA**GAG**CCA-**CTG****CTC**TAAGT-AACAGA-----A-T  
 Hoja -----CAACCCA**GAG**CCA-**CTG****CTC**TAAGT-AACAGA-----A-C  
 Bede -----ACAACCAA**GAG**TCG-**CCA****CTC**TAAGT-GACAGA-----A-C  
 Bosp -----TACAACCAA**GAG**CCG-**CCA****CTC**CAAGT-GACAGA-----A-T  
 Mysp -----AAAACCTAA**GAG**GTA-**CCC****CTC**TAAGA-AGCAGA-----A-C  
 Osja -----AAAACCTAA**GAG**ATA-**CCC****CTC**TAAGA-AGCAGA-----A-C  
 Sgro -----AACCGA**GAG**CTA-**CAT****CTC**TAAGA-AACAGT-----A  
 Pzpa -----AACCAA**GAG**CCA-**CGG****CTC**TAAGT-CTCAGA-----AAT  
 Zeja -----AGCCAA**GAG**CCA-**CAG****CTC**TAAGC-ATCAGA-----A--  
 Znne -----AACCAA**GAG**CTA-**CAG****CTC**TAAGA-AACAGA-----A--  
 Zefa -----AACCAA**GAG**CCA-**CAG****CTC**TAAGT-AACAGA-----A-A  
 Acni -----AACCAA**GAG**CCA-**CAG****CTC**TAAGT-ATCAGA-----A--  
 Ncrh -----AACCAA**GAG**CCA-**CAG****CTC**TAAGT-ATCAGA-----A-A  
 Agca -----AAGTAA**GAG**CTC-**CCG****CTC**TAACA-AACAAA-----A--  
 Hydy -----AGCCGA**GAG**TTA-**CAG****CTC**TAATA-AACAGA-----A--  
 Gsac -----AGCTGA**GAG**TTA-**CAA****CTC**TAATA-AACAGA-----A--  
 Pevo -----AACCAA**GAG**CGA-**CAG****CTC**TAAAG-AACAGA-----A-C  
 Hiku -----ACCCAA**GAA**TGT-**CAT****TTC**TAAGT-ACCAA-----A-T  
 Inpa -----AACCA**GAG**CCA-**CAG****CTC**TAAGC-AACAGA-----A-T  
 Auch -----TTAAACCTA**GAA**TGC-**CAA****TTC**AAAGT-AGCAGA-----A-C  
 Fico -----GAGCTAA**GAG**CTA-**CGG****CTC**TAGGC-AACAGA-----A-T  
 Macs -----AAACCAA**GAA**CTA-**CAG****TTC**TAGTT-AACAGA-----A  
 Moal -----AAACCAA**GAG**CCA-**CAC****CTC**TAATA-ATTAGA-----A--  
 Syma -----AACCAA**GAG**TTA-**CAA****CTC**TAACC-AATAG-----AAC  
 Maf r -----TAAAAACAA**GAG**CCA-**CCA****CTC**CAAAA-AACAGA-----A-C  
 Dcpe -----TACACCAA**GAG**CCA-**CAG****CTC**TAATT-AACAGA-----A-C  
 Dct i -----TACAACCGA**GAG**CCA-**CAG****CTC**TAATT-AACAGA-----A-C  
 Hehi -----TACAATTA**GAG**CCG-**CAG****CTC**TAATT-AACAGA-----A-T  
 Stam -----AACTAA**GAG**CTT-**CTG****CTC**TAAGT-AACAGA-----ACA  
 Hogi -----AAATTT**GAG**CCA-**CAG****CTC**TAATT-AACAGA-----A--  
 Erzo -----AGCCAA**GAG**CCA-**CAG****CTC**TAGGC-AACAGA-----A--  
 Hxot -----AGCTAA**GAG**CTA-**CAG****CTC**TAGTA-AACAGA-----A--  
 Core -----AACCAA**GAG**CTA-**CAG****CTC**TAGAA-AACAGA-----A-A  
 Apve -----AGCTAA**GAG**CTA-**CAG****CTC**TAGTA-AACAGA-----ATT  
 Lat j -----AACTAA**GAG**CCA-**CAG****CTC**TACCT-AACAGA-----A-A  
 Laja -----AACTGA**GAG**CTT-**CCG****CTC**TAGTG-AACAGA-----A-A

Syja -----AATCAA**GAG**TCC-**CCA****CTC**TAATG-AACAGA-----A--  
 Epme -----AACCAA**GAG**CGA-**CAG****CTC**TAATT-AACAGA-----C-A  
 Grse -----AACCAA**GAG**CCA-**CAG****CTC**TAACT-ACCAG-----AAC  
 Clja -----AACCAA**GAG**GGG-**CAC****CTC**AAAGG-AACAGA-----A-T  
 Ogcy -----ACCCAA**GAG**CCA-**CAG****CTC**AAAAT-AACAGA-----A-C  
 Plna -----AACCAA**GAA**TTA-**CAA****TTC**TAAGT-ATCAGA-----A-C  
 Lema -----AACTAA**GAG**CCC-**CCG****CTC**TAGTT-AACAGA-----A  
 Etzo -----AACTAA**GAG**CTA-**CTG****CTC**TAATT-AACAGA-----A-T  
 Apse -----AACCCA**GAG**TGA-**CAG****CTC**TAACA-AACAGA-----A-T  
 Epde -----AGCTAA**GAG**CTC-**CCG****CTC**TAGCA-AACAGA-----AAT  
 Slja -----AACCAA**GAG**CTT-**CCA****CTC**TAATG-CCCAGA-----A-T  
 Bsja -----AGCTAA**GAG**CTA-**CCG****CTC**TAAGA-AACAGA-----A-T  
 Ecna -----AACATA**GAG**CCA-**CAC****CTC**CAATT-AACAGA-----A  
 Cohi TATTCTTACCATAA**AGC**TAC-**TTC****CCC**AAATT-AAGAGTGACAGCTCTAAATTACAGTAT  
 Caar -----CAAGCAA**GAG**TTA-**CAA****CTC**TAGCT-AACAGA-----A-C  
 Came -----CAAGCAA**GAG**CTA-**CAA****CTC**TAACT-AACAGA-----ATC  
 Mema -----CAAACAA**GAG**CTA-**CAA****CTC**TAACA-AACAGA-----A  
 Lenu -----AGATTAA**GAG**CCC-**CCA****CTC**AAAGT-CCCAGA-----A-T  
 Brja -----CAACCAA**GAG**CCG-**CAA****CTC**TAGTG-AACAGA-----A-C  
 Plma -----CAACCAA**GAG**CCG-**CAG****CTC**TAAA-AACAGA-----AAT  
 Emst -----CAACTGA**GAG**CTC-**CCG****CTC**TAGCG-AACAGA-----A--  
 Ptti -----CAACCAA**GAG**CTC-**CCG****CTC**TAATA-AACAGA-----A-T  
 Losu -----AAACTAA**GAG**CTC-**CCG****CTC**TAATA-CTCAGA-----A-C  
 Geoy -----CAAACAA**GAA**CGA-**CAG****CTC**TAGTT-AACAGA-----A-A  
 Dipi -----CAGCCAA**GAG**CTT-**CCG****CTC**TACTA-AACAGA-----A-C  
 Pama -----AACCCAA**GAG**CTC-**CCG****CTC**TAATG-AACAGA-----A  
 Leob -----CAGCTAA**GAG**CTA-**CCG****CTC**TAATA-AGCAGA-----A-T  
 Neba -----CAATCAA**GAG**TTA-**CCA****CTC**TAACT-AACAGA-----A--  
 Pdpi -----AAACCAA**GAG**CCA-**CCA****CTC**TAACT-AGCAGA-----A-C  
 Nimi -----CAACTAA**GAG**CTC-**CCG****CTC**TAATA-AACAG-----AAT  
 Uptr -----AAAGCAA**GAA**CCG-**CAA****TTC**TAACT-AACAGA-----A-T  
 Pesc -----CAAACAA**GAT**TTC-**CCA****CTC**TAACGTAACAGA-----A  
 Baar --ATCCTAAATCAA**GAG**CCC-**CCG****CTC**TACTG-AACAG-----AAA  
 Moar -----CAACTAA**GAG**CTC-**CCG****CTC**TAATA-AACAGA-----A-T  
 Toja -----GAATTAA**GAG**CTA-**CAG****CTC**TAACT-AACAGA-----A  
 Chau -----GAATCGA**GAG**CTT-**CCG****CTC**AAACA-AACAGA-----A-T  
 Chse -----CAATCAA**GAG**TCC-**CCA****CTC**TAACA-AACAGA-----A--  
 Enar -----CAGCTGA**GAG**CTC-**CCG****CTC**TAATA-AACAGA-----A--  
 Hpty -----CAACTAA**GAG**CTC-**CCG****CTC**TAGTA-AACAGA-----A  
 Nana -----GAAATAA**GAG**TTA-**CAA****CTC**TAACT-AGCAGA-----A-C  
 Mcst -----AAACAGA**GAG**CTC-**CCG****CTC**TAATG-AACAGA-----ACC  
 Rhox -----TCACCAA**GAG**CTC-**CCG****CTC**TAATG-ACCAGA-----A-T  
 Opfa -----AAACTAA**GAG**CCC-**CCG****CTC**TAATA-AACAGA-----A  
 Paar -----AAATCAA**GAG**CTA-**CCG****CTC**TAAATCAACAGA-----A-A  
 Gozo -----AAACTAA**GAG**CTC-**CCG****CTC**TAGAA-AACAGA-----A-T  
 Ackr -----GAAGCGC**GAG**CGC-**CAG****CTC**TAACT-AACAGA-----A-T  
 Elev -----CAGCTAA**GAG**CTC-**CCG****TTC**AAGGA-AACAGA-----A-T  
 Trdu -----CAACCCA**GAG**TTA-**CAA****CTC**CAAGT-AACAGA-----A-C  
 Amoc -----AAAATAA**GAG**CCA-**CCG****CTC**AAAGT-ATCAGA-----A  
 Hame -----AAACCAA**GAG**CCT-**CTG****CTC**TAAGA-ATCAGA-----A-C  
 Chso -----GAACCAA**GAG**TTT-**CCA****CTC**TAAGT-AACAAG-----ACC  
 Lyto -----ACAATAA**GAG**CCA-**CAG****CTC**TAGTA-AACAGA-----A-A



Encr -----AACTAA**GAG**CTA-**CAG****CTC**TAGTA-AACAGA-----A-A  
 Bvar -----AGTCAA**GAA**TTA-**CAT****CTC**CAGGC-AGCAGA-----A--  
 Noco -----AACTCA**GAG**CCA-**CAG****CTC**TAAGA-AACAAA-----A--  
 Chsp -----AACTTA**GGG**CCT-**CCA****CCC**TAAGT-CACAGA-----A-C  
 Arja -----AACTAA**GAG**CTA-**CAG****CTC**TAGTA-AACAGA-----A-C  
 Pase -----AAACAA**GAG**CTA-**CCG****CTC**TAATT-CTCAGA-----A-  
 Trel -----AACTGA**GAG**CGA-**CAG****CTC**CAAGA-AGCAGA-----A-C  
 Lifa GTTTCCTAAAACAC**GAA**CAA-**CCA****TTC**TAGTT-ATCAGA-----A-T  
 Acur -----AATTA**GAG**CCA-**CCG****CTC**TAGTT-AACAGA-----A-  
 Ampe -----AACTAA**GAG**CTA-**CAG****CTC**TAATG-AACAGA-----A-  
 Urja -----AACCAA**GAG**CCA-**CCG****CTC**TAATC-AACAGA-----A--  
 Enet -----AACCCA**GAG**CAC-**CCG****CTC**TAAGC-AACAGA-----A--  
 Ptbr -----GAACTTA**GAG**TGG-**CAA****CTC**AAAGT-TACAAA-----A-C  
 Safa -----GAACGAA**GAG**CGA-**CAA****CTC**AAAGT-ACCAGA-----A-C  
 Icae -----CAACCAA**GAG**CTG-**CAG****CTC**TAGCA-AACAGA-----A-  
 Asmi -----CAGAGAA**GAA**CCA-**CAG****TTC**TTCCA-CACAAA-----A-  
 Foal -----AACTAA**GAG**AAA-**CAA****GTC**CAGGT-CACAGA-----A-  
 Drze -----AAAGCTA**GAA**CCC-**TTA****TTC**TAACT-AACAGA-----A-  
 Rhas -----AAAACCA**GAG**CCA-**CAG****CTC**TAACA-AGCAGA-----A-C  
 Elac -----AAAATA**GGG**CCA-**CAC****CCC**TAATA-AACAGA-----A--  
 Kugu -----AAACCAA**GAG**CCA-**CAG****CTC**TAAAA-AACAGA-----A--  
 Plor -----CAACCAA**GAG**TTC-**CCA****CTC**CAATA-AACAGA-----A-  
 Sgun -----CAGCCATA**GAG**CTC-**CCG****CTC**TAAGC-AACAGA-----A-T  
 Zaco -----ACAATCCA**GAG**CTC-**CCG****CTC**TAACG-AACAGA-----AAA  
 Zbfl -----ACAACTCA**GAG**CTC-**CCG****CTC**TAATA-AACAGA-----A-C  
 Spba -----AAAACCAA**GAG**CTA-**CGA****CTC**TAACT-AGCAGA-----A-A  
 Game -----ACAACCAA**GAG**CTG-**CAG****CTC**TAATG-AACAGA-----A-  
 Thth -----ACAACCAA**GAG**CTG-**CAG****CTC**TAAAG-AACAGA-----A-T  
 Xigl -----ACAACTAA**GAG**CTA-**CAG****CTC**TAACT-AACAGA-----ATA  
 Hyja -----ACGACCAA**GAG**CTG-**CAG****CTC**TAACG-AACAG-----AAT  
 Psan -----CAACCAA**GAG**CTG-**CAG****CTC**TAACA-AACAAA-----A--  
 Cupa -----CAACCAA**GAG**CTG-**CAG****CTC**TAATA-AACAGA-----A-T  
 Mpch -----CAGCTAA**GAG**ACA-**CTA****CTC**TAAGC-AACAGA-----A--  
 Char -----AAACCAA**GAG**CCA-**CGG****CTC**TAAGC-AATAG-----AAC  
 Pser -----AACTAA**GAG**CCA-**CAG****TTC**TAAGC-AACAGA-----A-T  
 Prol -----AAGCTA**GAG**CGA-**CAG****CTC**TAATC-AGCAGA-----A-  
 Plbi -----AAGCCA**GAG**CAA-**CAG****CTC**TAACA-AGCAGA-----A-A  
 Calu -----GAAACCC**GGG**CTC-**CGG****CCC**TAGTT-CACGAA-----A-A  
 Papa -----AAGTCA**GAG**CTAA**CAA****CTC**TAACT-AACAGA-----A--  
 Suf r -----AAAAAA**GAG**CCC-**CTG****CTC**TAAAA-AACAGA-----A--  
 Stci -----AAACAA**GAG**CAC-**CCG****CTC**TAATT-AACAGA-----A--  
 Taru CTTTTTAAACCAA**GAG**TCA-**CCA****CTC**TAGGA-TACAG-----AAC  
 Rala -----CATCCTA**GAG**TTA-**CCA****CTC**TAATA-AACAGA-----A-A

|      | 48                        | 48'              | D'                 | 43'      |
|------|---------------------------|------------------|--------------------|----------|
| Scca | T-TTTATCG--AAAAAT---GACC  | CAGGATTTT-----   | CTGATCAATCAACC     | AAGTTIAC |
| Muma | A-TTTATCGA-A-AAAT---GACC  | CAGG-ATT-----    | TCCTGATCAATCAACC   | AAGTTIAC |
| Erca | AC-CTG-TCATTAA-----GATC   | CAGA-CTAA-----   | CTGATCAACCAACC     | AAGTTIAC |
| Pose | A-TCTGACAT-T-A--A---GATC  | CAGACTAAT-----   | CTGATCAACCAACC     | AAGTTIAC |
| Actr | CATCTGACGA-ACAAT---GACC   | CAGGC-T--A-AAGC  | CTGATCAACCAACC     | AAGTTIAC |
| Scal | A-TCTGACG--AACAAT---GACC  | CAGGCCAAA---GC   | CTGATCAACCAACC     | AAGTTIAC |
| Posp | A-TCTGACGA-A-CAAT---GATC  | CAGGCCCAGC-----  | CTGATCAACCAACC     | AAGTTIAC |
| Atsp | -ATCTGAC--GATAA---ATGATC  | CAGACCTGT-----   | CTGATCAACGACC      | AAGTTIAC |
| Leoc | AATCTGACGAT--AAAT---GACC  | CAGACC-----      | TGTCTGATCAACCAACC  | AAGTTIAC |
| Amca | A-CCTGACGA-A-CAAT---GACC  | CAGGCATACC-AAGC  | CTGATCAACCAACC     | AAGTTIAC |
| Osbi | ATTCTGACTAACAA-----TGATC  | CGAACTT-----     | TCCATCAACCAACC     | AAGTTIAC |
| Pabu | ATTCTGACTAC--ACA----GATC  | CGAATT-----      | ATCCATTAACCAACC    | AAGTTIAC |
| Hial | AATCTGACC--AAAAAT---GATC  | CGGCCA---AAGC    | CCGATCAACGACC      | AAGTTIAC |
| Elha | CATCTGACCAAAAAAT-----GATC | CGGCCAAA---GC    | CCGATCAACCAACC     | AAGTTIAC |
| Mlcy | AATCTGACC--AAAAAG---ACCC  | AGGCCAAAC-ACGC   | CTGATCAACCAACC     | AAGTTIAC |
| Algl | TATCTGACCA-GAAAT---GATC   | CAGGC-C--A-AGGC  | CTGATCAACCAACC     | AAGTTIAC |
| Ptgi | AT-CTGACCAAAAA--T---GATC  | CAGGCCGAA---GC   | CTGATCAACCAACC     | AAGTTIAC |
| Alaf | ATTTTGACCAATAAT-----GACC  | CGGACCAA-----    | ATCCGATCAACCAACC   | AAGTTIAC |
| Nock | AATTTGACCA-ATAAT---GACC   | CGGAATA-----     | AATCCGATCAACCAACC  | AAGTTIAC |
| Anja | --TCTGACCAAAAAGT-----GACC | CAGAATACTA--ATT  | CTGATCAACCAACC     | AAGTTIAC |
| Gyki | ATTCTGACT--AAATGT---GACC  | CAGGCC-----      | TAGCCTGATCAACCAACC | TAGTTIAC |
| Syka | A-TCTGACCA-A-AAAT---GACC  | CAGGACCTAG---TC  | CTGATCAATCAACC     | AAGTTIAC |
| Opma | A-TCTGACC--AAACAT---GACC  | CGGACAAAC-AAAC   | CCGATCAATCAACC     | AAGTTIAC |
| Comy | T-TTTGACCA-ATAAAC---GACC  | CAGGGACAAC-ATCC  | CTGAGCAATCAACC     | AAGTTIAC |
| Sasp | AT-CTGACCAC-ATG----ACCC   | AGGCCATA---AC    | CTGATCAACCAACC     | AAGTTIAC |
| Eupe | AATCTGACACAAGATCCG--GGTG  | CAATG-A-----     | ACCCGATCAATCAACC   | AAGTTIAC |
| Enja | T-TTTGAC-TGAAAT-----GATC  | CGGTTGAAA---AA   | CCGATTAACCAACC     | AAGTTIAC |
| Same | CATTTGACCAA--TAAT---GATC  | CGGCTT-----      | AATGCCGACCAACGACC  | AAGTTIAC |
| Chch | A-TCTGACCA-A-AAAT---GATC  | CGGA-CACCA---GA  | CCGATCAACCAACC     | AAGTTIAC |
| Grgr | CATCTGACC--AAACAT---GATC  | CGGCGTGCG---CG   | CCGACAACGACC       | AAGTTIAC |
| Caau | A-TCTGACCA-A-ATAT---GATC  | CGGCTAATAC-AA-G  | CCGATCAACCAACC     | AAGTTIAC |
| Cyca | AT-CTGACCAAAATAT-----GATC | CGGCTTAACACATAG  | CCGATCAACCAACC     | AAGTTIAC |
| Dare | CACCTGACC--AAAGAC---GATC  | CGGCCTA---TAAG   | CCGATCAACCAACC     | AAGTTIAC |
| Cost | AT-TTGACCAATAAT-----GATC  | CGGCCAA---TAAGA  | CCGATCAGCGACC      | AAGTTIAC |
| Leec | ATTCTGACCA-ATTAT---GATC   | CGGCCACT---AGG   | CCGATCAACCAACC     | AAGTTIAC |
| CrIa | C-TCTGACC--AAATAT---GATC  | CGA CCTATAA--AG  | TCCATCAACCAACC     | AAGTTIAC |
| Clmc | CATCTGACCA---AAT----GATC  | CGGCCACA--T-AGA  | CCGATCAACGACC      | AAGTTIAC |
| Phin | --TCTGACCA-TAAT-----GATC  | CGACCAATCG---G   | CCGATTAACCAACC     | AAGTTIAC |
| Icpu | T-TCTGACC--AA-A-A---GATC  | CGGCTTCTCT-----  | GCCGACCAACGACC     | AAGTTIAC |
| Psto | T-TCTGACC--AC-AAA---GATC  | CGGCACTAT-----   | GCCGATCAACGACC     | AAGTTIAC |
| Cora | TTTCTGACCACACA-----GATC   | CGG-CAAT---TG    | CCGATCAATGACC      | AAGTTIAC |
| Eisp | AT-TTGACCAA-AAA-----GATC  | CGGCCTCCA---GG   | CCGATCAACCAACC     | AAGTTIAC |
| Apal | A-TCTGACTA-A-AACA---GACC  | CGG GTATAAC-AC-- | CCGATTAACCAACC     | AAGTTIAC |
| EsLu | T-TCTGACC--AAAAA---GATC   | CGACACC-----     | AGTCCATCAACGACC    | AAGTTIAC |
| Dape | CTTCTGACCAA---AAT---GATC  | CGACAT-----      | AG--TCCATCAACCAACC | AAGTTIAC |
| Glse | -TTCTGACC--AAAA---ATGATC  | CGGTAACA-----    | CCGATCAACCAACC     | AAGTTIAC |
| Naar | TTTCTGACC--AATA-T---GATC  | CGGCA-----       | AATGCCGATCAACGACC  | AAGTTIAC |
| Baoc | TTTCTGACCAAAA-C-----GATC  | CGG--CATA---CG   | CCGATCAACGACC      | AAGTTIAC |
| Opso | T-TCTGACCAAAAAAT-----GACC | CGACATAAT---AA   | TCCATCAACCAACC     | AAGTTIAC |
| Alte | CATCTGACCATAAAT-----GATC  | CGG-CAAAA-----   | GCCGATCAACCAACC    | AAGTTIAC |
| Plap | AT-CTGACCATAAAT-----GATC  | CGGCCAA-----     | GCCGATCAACCAACC    | AAGTTIAC |

Plal AT-CTGACCAA-AAT-----GATCCGGCAAATT----TGCCGATTAACCGAACAAAGTTIAC  
 Sami T-TCTGACCA-A--GAT---GATCCGGCGTAA-----CGCCGATTAACCGAACAAAGTTIAC  
 Rere ATTCTGACC--AAAAAT---GATCCGGC----AC-AT-GCCGATTAACCGAACAAAGTTIAC  
 Gama TT-CTGACCAGGAT-----GATCCGGC--ATA-----GCCGATCAACCGACCAGTTIAC  
 Onmy TATCTGACCAA--ATAT---GATCCGGCG-----AACGCAATCAACCGACCAGTTIAC  
 Sasa -TTCTGACCAAAAA-----TGATCCGGCATCAC-----GCCGATCAACCGACCAGTTIAC  
 Cola TTTCTGACCAGAAAT-----GATCCGGC-CGAA-----CGCCGATCAACCGACCAGTTIAC  
 Dita T-TCTGACTA-A--AT---GATCCGGCGCAC-----GCCGATCGACCGACCAGTTIAC  
 Gogr T-TCTGACC--AAAA-T---GATCCGGCCTGC-----GCCGATCCACCAACCAGTTIAC  
 Chsl AT-CTGACCATAAA-----GATCCGGCTTAAC-----GCCGATTAACCAACCAGTTIAC  
 Atja T-TCTGACCT-A-ACA----GATCCGGCCTTTTT-AAAGCCGATCAACCGACCAGTTIAC  
 Iido CTTCTGACCT-ACCA-----GATCCGGCCTT--T--AAGCCGATCGACCGACCAGTTIAC  
 Auja CTTCTGACCCAAAT-----GATCCGGC-CCAA-----GCCGATCAACCAACCAGTTIAC  
 Chag CCTCTGACCC---TAAT---GATCCGGCCCA---CCCGCCGATCAACCAACCAGTTIAC  
 Hami CT-CTGACCTA--ACT----GATCCGGCCT----ACCGCCGATCAACCGACCAGTTIAC  
 Saun --TCTGACCTTC-AT-----GATCCGGCCTACCG----GCCGATCAACCGACCAGTTIAC  
 Nema TT-CTGACCATTAIA-----GATCCGGCA---A---TGCCGATCAACCGACCAGTTIAC  
 Disp T-TCTGACC--ACCAAG---GAGCCGGCAATG-----CCGATCAACCGACCAGTTIAC  
 Myaf CTTCTGAC--CACCTAAA--GATCCGGC--CATA---AGCCGATTAATCGACCAGTTIAC  
 Lagu A-TCTGACC--ACCAAT---GACCCCGGCCCT-----GCCGACAAACCAACCAGTTIAC  
 Trtr GATCTGACCTT--TAAT---GATCCGGCC-----TGCCGATCAACCAACCAGTTIAC  
 Zucr TTCCTGACT--TCTAAT---GATCCGGCC-----TG--CCGATCAACCAACCAGTTIAC  
 Pxja CATCTGACCTT--CAA----GATCCGGCAA-----A-GCCGATCAACCGACCAGTTIAC  
 Pxlo A-TCTGACCTTCAA-----GATCCGGCAA-----GCCGATCAACCGACCAGTTIAC  
 Pctr A-TCTGACC--T-GTAC---GATCCGGCAAG-----CCGATCAACCAACCAGTTIAC  
 Apsa A-TTTGACCA-C-CA----GATCCGGCAGTTCC--AAGCCGATCAACCAACCAGTTIAC  
 Cabe TATCTGACCTA--TA-----GATCCGGCAA-----AGCCGATCAACCAACCAGTTIAC  
 Bzze CTTCTGACCAT--AA-T---GATCCGGCAA-----AGCCGATCAACCGACCAGTTIAC  
 Siim CTTCTGACCAT--AAAT---GATCCGGCAA-----AGCCGATCAACCAACCAGTTIAC  
 Ctru CATCTGACCATCAA-----GATCCGGC-CAAAG-----CCGATCAACCAACCAGTTIAC  
 Dpbr A-TCTGACCA-G-CAA----GATCCGGC--CAA-----GCCGATCAACCAACCAGTTIAC  
 Caki T-TTTGACTTTAAAAAT---GATCCGGCTACAA-----CCGATTAACCAACCAGTTIAC  
 Phja A-TCTGACC--T--TAC---GATCCGGTT-AC-----CCGATTAACCAACCAGTTIAC  
 Brsp --TCTGACTTTATTA-----GATCCGGTTAATTA----CCGACTAACCAACCAGTTIAC  
 Gamo ATTCTGACCTTTTCT----GATCCGGC-TATA-----ACCCGATCAACCAACCAGTTIAC  
 Lolo TT-CTGACTTTTC-T-----GATCCGGC-----TATAACCCGATCAACCAACCAGTTIAC  
 Batr --TGTAACCTC--AA-----GACCCAATAACA-----ATTGATCATTCAATTAAAGTTIAC  
 Prmy TATCTGACCT-CTAA-----GACCACCA-----TGCCTGATTAATCAACCAGTTIAC  
 Loli CTTCTGACCATAAAT-----GATCCGGCAGCAAG-----CCGATTAACCAACCAGTTIAC  
 Loam AT-CTGACCAAAAA-----GATCCGGCCTAAA-----GCCGATCAACCGACCAGTTIAC  
 Chab CTTCTGACC--ACCAA----GACCCCGGC-----A-A-GGCCGATCCACCGACCAGTTIAC  
 Chto T-TCTGACC--ACCAA----GACCCCGGCAA-----GCCGATCCACCGACCAGTTIAC  
 Majo A-TCCGACC--ACAAT---GATCCGGCC--AA----GCCGATCAACCGACCAGTTIAC  
 Hlst TATCCGACCA-ACAAT---GATCCGGCTA-----A--GCCGATCAACCAACCAGTTIAC  
 Clpe T-TCTGACCT---TAAA---GATCCGGCA-----TGGCCGATCAACCGAACAGTTIAC  
 Mlmr TTTCTGTCC--ATAA-A---GACCCCGGCT-----AAGGCCGATCAACCAACCAGTTIAC  
 Crcr -TTCTGACCAAAAAA---ATGATCCGGC-AAT-----GCCGATTAACCGACCAGTTIAC  
 Muce TT-CTGACCAAAAAAAT---GATCCGGC--CAAT----GCCGATTAACCGACCAGTTIAC  
 Bege TTTCTGACCA-TCAA----GATCCGGC---C--C--AAGCCGATCAACCAACCAGTTIAC  
 Mela -CTCTGACCCTCA-----AGATCCGGCTTTA-----CCGATCAACCAACCAGTTIAC  
 Hats ATTCTGACCAT--AA-T---GATCCGGCAC-----CGCCGATCAACCGAACAGTTIAC  
 Orla CATCTGACC--TTTA-T---GATCCGGCC-----TG-GCCGATCAACCGACCAGTTIAC

Cosa T-TATGACCA-A-AAAT---GATC**CCG**CAATG-----**CCG**ATCAAC**C**AATC**GAGTT**AC  
 Exsp T-TCTGACCA----GAA---GATC**CCG**-----CC--AAG**CCG**ATCAAC**C**GACC**AAGTT**AC  
 Depa AT-TTGACCAAAAAT-----GATC**CCG**CA---A---TG**CCG**ATTAAC**C**AACC**GAGTT**AC  
 Rima C-TCTGACC--CCAA-A---GATC**CCG**AC---A---CA**CCG**ATCAAC**C**AACC**AAGTT**AC  
 Fuol A-TCTGACC--TT-AAT---GATC**CCG**CA--GT-----G**CCG**ATCAAC**C**AACC**GAGTT**AC  
 Gmaf T-TCTGACC--CT--AA---GATC**CGA**CACA-----G**TCC**ATCAAC**C**GACC**AAGTT**AC  
 Xeei T-TCTGACCT-T-ACA----GATC**CCG**-----T--ATTA**CCG**ATCAAC**C**AACC**AAGTT**AC  
 Pros C-TCTGACC--ATCAAT---GATC**CCG**TATA-----A**CCG**ATCAAC**C**GACC**GAGTT**AC  
 Scmi CATCTGACCA-TTAAC----GATC**CAG**CAA-----G**CTG**ATCAAC**C**GACC**AAGTT**AC  
 Rolo C-TCTGACC--AG-AAT---GATC**CCG**--CAAA----G**CCG**ATCAAC**C**GACC**GAGTT**AC  
 Cere CCTCTGACCAA--AAT----GATC**CCG**AAA-----TA**CCG**ATCAAC**C**AACC**GAGTT**AC  
 Daga ATTCTGACC--AA-AAC---GATC**CCG**-CTG-----AGG**CCG**ATCAAC**C**GACT**GAGTT**AC  
 Anco -TTCTGAC---CAAA---ATGATC**CCG**CAATG-----**CCG**ATCAAC**C**GACC**GAGTT**AC  
 Dmve --TCTGACCA-AAAT-----GATC**CCG**CAATG-----**CCG**ATCCAC**C**GACC**GAGTT**AC  
 Dmar ATTCTGACCA-AAAT----GATC**CCG**CA---A-C--G**CCG**ATCCAC**C**GACC**GAGTT**AC  
 Anka CTTCTGACCA-TTA-T----GATC**CCG**CAGC-----G**CCG**ATCAAC**C**GACC**GAGTT**AC  
 Moja T-TCTGACCA-A-CA-T---GATC**CCG**C-AAC-----G**CCG**ATCAAC**C**GACC**GAGTT**AC  
 Hoja T-TCTGACCA-A--TAT---GATC**CCG**--CAAC-----G**CCG**ATCAAC**C**GACC**GAGTT**AC  
 Bede CT-CTGACCATAAAT-----GATC**CCG**T-----ACTA**CCG**ATCAAC**C**AACC**GAGTT**AC  
 Bosp C-TCTGACCA-T-AAAT---GATC**CCG**TAC-----TA**CCG**ATCAAC**C**AACC**GAGTT**AC  
 Mysp A-TCTGACCA-T-AAAT---GATC**CCG**CACA-----G**CCG**ATCAAC**C**GACC**GAGTT**AC  
 Osja A-TCTGACCATAAAT-----GATC**CCG**CACA-----G**CCG**ATCAAC**C**GACC**GAGTT**AC  
 Sgro TATCTGACC--AAAAAT---GATC**CGA**C-----A-CTAG**TCC**ATCAAC**C**AACC**GAGTT**AC  
 Pzpa --TCTGACCTACAAT-----GATC**CCG**--GCA-----A**CCG**ATCAAC**C**AACC**AAGTT**AC  
 Zeja ATTCTGACCTATAT-----GATC**CCG**-GCAA-----**CCG**ATCAAC**C**AACC**AAGTT**AC  
 Znne ATTCTGACCT--ATAT---GATC**CCG**G-----A-A-A**CCG**ATCAAC**C**AACC**GAGTT**AC  
 Zefa T-TCTGACC--T-AAAT---GATC**CCG**GCA-----A-**CCG**ATCAAC**C**AACC**GAGTT**AC  
 Acni ATTCTGACCT-A-AAT---GATC**CCG**GC-----AA-**CCG**ATCAAC**C**AACC**GAGTT**AC  
 Ncrh T-TCTGACC--TA-AAT---GATC**CCG**GC--AA-----**CCG**ATCAAC**C**AACC**GAGTT**AC  
 Agca TTTTTGACCAATA-A-----GATC**CCG**---CAA---CG**CCG**ATCAAC**C**GACC**GAGTT**AC  
 Hydy ATTCTGACCA-AAAA-----GATC**CCG**CAAC-----G**CCG**ATCAAC**C**GACC**GAGTT**AC  
 Gsac TTTCTGACCTAAAA-----GATC**CCG**-C-AAT---G**CCG**ATCAAC**C**GACC**TAGTT**AC  
 Pevo T-TCTGACC--TTA-AT---GATC**CCG**CATC-----G**CCG**ATCAAC**C**AACC**GAGTT**AC  
 Hiku A-TTTGACCC-----AT---GATC**CCG**C-AAC-----AG**CCG**ATCAAC**C**AACC**TAGTT**AC  
 Inpa TT-CTGACCAA--ACA---GATC**CCG**C-----ACAG**CCG**ATCAAC**C**GACC**AAGTT**AC  
 Auch CTTCTGATCTAATATT----GATC**CCG**CCT----CACGG**CCG**AACAAC**C**GACC**GAGTT**AC  
 Fico T-TCTGACCA-G-CAA---GATC**CCG**TA-----CAT**CCG**ATCAAC**C**GACC**GAGTT**AC  
 Macs TTTCTGACCAT---ACA---GATC**CCG**CAA-----AG--**CCG**ATCAAC**C**AACC**GAGTT**AC  
 Moal CTTCTAACCATAATA-----GACC**CCG**---AAT---AC**CCG**ATCTT**C**CAACA**AAGTT**AC  
 Syma -TTCTAACCATTCAACACAAGACC**CCG**CAAC-----G**CCG**ATCTAC**C**AACT**AAGTT**AC  
 Maf r T-TCTGAC---T-ACAA---GATC**CCG**CAATA-----**CCG**ATCAAC**C**AACC**AAGTT**AC  
 Dcpe T-TCTGACC--ACA--C---GATC**CCG**CAAT-----G**CCG**ATCAAC**C**GACC**GAGTT**AC  
 Dct i T-TCTGACC--AC--AC---GATC**CCG**CAAC-----G**CCG**ATCAG**C**GACC**GAGTT**AC  
 Hehi AT-CTGACCAATAA-----GATC**CCG**C--AAT---G**CCG**ATCAAC**C**GACC**GAGTT**AC  
 Stam --TCTGACCAGC-AA-----GATC**CCG**CAAT-----G**CCG**ATCAAC**C**GACC**GAGTT**AC  
 Hogi TGTCTGACCA-G-CA-----GATC**CCG**CA-----AAG**CCG**ATCAAC**C**GACC**CAGTT**AC  
 Erzo CTTCTGACCAGCAA-----GATC**CCG**-C-AA-----TG**CCG**ATCAAC**C**GACC**GAGTT**AC  
 Hxot ATTCTGACCAACAA-----GATC**CCG**-CAA-----CG**CCG**ATCAAC**C**GACC**GAGTT**AC  
 Core T-TCTGACC--AACA-A---GATC**CCG**CA-AT-----G**CCG**ATCAAC**C**GACC**GAGTT**AC  
 Apve --TCTGACCA-ATAA-----GATC**CCG**C-AAT-----G**CCG**ATCAAC**C**GACC**AAGTT**AC  
 Lat j -TTCTGGCCAA--CAAT---GATC**CCG**CAA-----TG**CTG**ATCAAC**C**GACC**AAGTT**AC  
 Laja T-TCTGACC---AACAA---GATC**CCG**CAACG-----**CCG**ATTAAC**C**GACC**GAGTT**AC

Syja TTTCTGACCT-ACTA-----GATCCCGCAAC-----GCCGATCAACCGACCAGTTIAC  
 Epme CTTCTGACCAA--TAA----GATCCCGCAA-----CGCCGATCAATCGACCAGTTIAC  
 Grse -TTCTGACCAAC-----AGATCCCGCAAT-----GCCGATTAATCGACCAGTTIAC  
 Clja T-TCTGACT--ATGCAC---GATCCCGCA-AT-----GCCGATCTACCGACCAGTTIAC  
 Ogcy T-TCTGACC--A-AA-A---GATCCCGCA---A---AGCCGATCAACCGACCAGTTIAC  
 Plna T-TCTGACCT-C-TCGT---GATCCCG-----CC-AAAGCCGATCAACCGACCAGTTIAC  
 Lema TTTCTGACC--AACAAA---GATCCCGC-----AA-C--GCCGATCAACCGACCAGTTIAC  
 Etzo T-TCTGACC--AATA-A---GATCCCGCA-AC-----GCCGATCAACCGACCAGTTIAC  
 Apse T-TCTGACC--AAGTAT---GATCCCGCAA-----AGCCGATCAACCGACCAGTTIAC  
 Epde --TCTGACCAG-CAG----GATCCCGCAATG-----CCGATCAACCGACCAGTTIAC  
 Slja T-TCTGACTA-A-AAGT---GATCCCGCAAC-----GCCGATTAACCGACCAGTTIAC  
 Bsja T-TCTGACC--T-ATTA---GATCCCGCTTA-----CGCCGATCAACCGAACAGTTIAC  
 Ecna CTTCTGACCAA--AAAT---GATCCCGC-----AATGCCGATCAACCGACCAGTTIAC  
 Cohi -TTCTGACCATAAA-----TGATCCCGCATT-----GCCGATTAACCGACCAGTTIAC  
 Caar T-TCTGACCC-T-ATAT---GATCCCGCTTC-----TGCCGATCAACCGACCAGTTIAC  
 Came --TCTGACCTCTTAC-----GATCCCGCTCTC-----GCCGATCAACCGACCAGTTIAC  
 Mema CTTCTGACCAA--AAAT---GATCCCGCAA-----CGCCGATCAACCGACCAGTTIAC  
 Lenu A-TCTGACCA-A-CAAT---GATCCCGCAAC-----GCCGAACGACCGACCAGTTIAC  
 Brja T-TCTGACCA-A-ATAT---GATCCCGCAGTG-----CCGATCAACCGACCAGTTIAC  
 Plma --TCTGACCATA-AA-----GATCCCGCAAT-----GCCGATCAACCGACCAGTTIAC  
 Emst TTTCTGACCA-ATAA-----GATCCCGCA-----ACGCCGATCAACCGACCAGTTIAC  
 Ptti T-TCTGACCA-T-C-TA---GATCCCGCAAGA-----CCGATCAACCGACCAGTTIAC  
 Losu ACTCTGACCT-A-ATAA---GATCCCGCAAG-----GCCGATCAACCGACCAGTTIAC  
 Geoy AATCTGACTTTTTAA----GATCCCGCATA-----GCCGATCAACCGACCAGTTIAC  
 Dipi TT-CTGACCTTAA-----GATCCCGCA---A---AGCCGATCAACCGACCAGTTIAC  
 Pama ATTCTGACCAA--TAA----GATCCCGCAC-----ACGCCGATCAACCGACCAGTTIAC  
 Leob T-TCTGACCA-A-AAAT---GATCCGACA-----ACGTCCGATCAACCGACCAGTTIAC  
 Neba CTTCTGACCTTAAGT----GATCCGACAAA-----GTCCGATCAACCGACCAGTTIAC  
 Pdpi T-TCTGACC--AGAAAT---GATCCCGCAAC-----GCCGATCAACCGACCAGTTIAC  
 Nimi -TTCTGACCAATAC-----AGATCCCGCAAA-----GCCGATCAACCGACCAGTTIAC  
 Uptr T-TCTGACC--AAT-AA---GATCCCGCAAT-----GCCGACCAACCGACCAGTTIAC  
 Pesc TTTCTGACC--T-TAT---GATCCCGCAA-----TGCCGATTAACCGACCAGTTIAC  
 Baar -TTCTGACCTACTCA---ATGACCCGCA-----ACGCCGATCAACCGACCAGTTIAC  
 Moar T-TCTGACC--AACAA----GATCCCGCA-----AAGCCGATCAACCGACCAGTTIAC  
 Toja TTTCTGACC--AAAAAT---GATCCCGC-----AGTCCGATCAACCGAACAGTTIAC  
 Chau AT-CTGACTAA--ACAA---GATCCCGC-----AATGCCGATCAACCGACCAGTTIAC  
 Chse CCTCTGACCA-AAAAT----GATCCCGCA-----ATGCCGATCAACCGACCAGTTIAC  
 Enar TTTCTGACCA-ATCA-----GATCCCGCAAC-----GCCGATCAACCGACCAGTTIAC  
 Hpty ATTCTGACC--AATAA----GATCCCGCAG-----CG--CCGATCAACCGACCAGTTIAC  
 Nana TT-CTGACCTT-AT-----GATCCCGCAC-----ACGCCGATCAACCGACCAGTTIAC  
 Mcst TTTCTGACCA-GTAA-----GATCCCGCA-----GAGCCGATCAACCGACCAGTTIAC  
 Rhox T-TCTGACCA-A--ACA---GATCCCGCATAG-----CCGATCAACCGACCAGTTIAC  
 Opfa TTTCTGACCAA--TCA----GATCCCGCAA-----CGCCGATCAACCGACCAGTTIAC  
 Paar T-TCTGACCAAATA---GATCCCGCAA-----AGCCGATCAACCGACCAGTTIAC  
 Gozo TT-CTGACCAA--TAA----GATCCCGC-----AGCGCCGATCAACCGACCAGTTIAC  
 Ackr T-TCTGACC--TCCA----GACCCGACCCCC----GCCGATCAACCGACCAGTTIAC  
 Elev AT-CTGACCAC--AA-----GATCCCGCA---A---TGCCGAACAACCGACCAGTTIAC  
 Trdu T-TCTGACC--AA-TAA---GATCCCGCACATA---GCCGATCAACCGACCAGTTIAC  
 Amoc ATTTTGACCAACTATGT---GATCCCGCTT----AACGCCGATCAACCGACCAGTTIAC  
 Hame T-TCTGACC----ACCA---GATCCCGCAA-----AGCCGATCAACCGACCAGTTIAC  
 Chso TACTTGACC--TTTGA---GATCCCGCAT-----AAGCCGATCAACCGACCAGTTIAC  
 Lyto TT-CTGACCAGCAA-----GATCCCGC--AAT----GCCGATCAACCGACCAGTTIAC

Encr T-TCTGACCA-G-C-AA---GATC**CGG**CAATG-----**CCG**ATCAAC**G**GACC**GAGTT**AC  
 Bvar TTTCTGACCA-TAA-----GATC**CGG**---CAG---CG**CCG**ATCAG**C**AACC**AAGTT**AC  
 Noco TTTTTGACCT--A-AA---GATC**CGG**C-----A-ATG**CCG**ATCAAC**G**GACC**GAGTT**AC  
 Chsp A-TCTGACC--CACATA---GATC**CAG**CACATC---AG**CTG**ATCAAC**G**AAAC**CAGTT**AC  
 Arja T-TCTGACCA-G-T-AA---GATC**CGG**CA-AT-----G**CCG**ATCAAC**G**GACC**GAGTT**AC  
 Pase CCTCTGACTTA--TAAT---GATC**CGG**CAA-----TG**CCG**ATCAAC**G**GACC**AAGTT**AC  
 Trel T-TCTGACCA-T-A-AT---GATC**CGG**C-CA-----AG**CCG**ATTAAT**G**GAAC**TAGTT**AC  
 Lifa T-TTTGACCT-A--AC---GACC**CGG**CAAAG-----**CCG**ATCAAC**C**AACC**AAGTT**AC  
 Acur TATCTGACCCA---TA---GATC**CAG**CAA-----AG--**CTG**ATCAAC**G**GACC**CAGTT**AC  
 Ampe TTTCTGACC--AACAA---GATC**CGG**CAA-----TG--**CCG**ATCAAC**G**GACC**GAGTT**AC  
 Urja CTTCTGACCA-ATTA-----GATC**CGG**CA-----AAG**CCG**ATTGAC**C**AACC**AAGTT**AC  
 Enet CTTCTGACCAAAACC-----GATC**CGG**-CGATT---TG**CCG**ATCAAC**C**AATC**CAGTT**AC  
 Ptbr A-TTTGACCTAAGAT-----GATC**CGG**CTT-----AG**CCG**ATCAAC**G**AAAC**CAGTT**AC  
 Safa A-TCTGACCT-A-ATCT---GATC**CGG**--CTCAC---TG**CCG**ATTAAC**C**AAAC**CAGTT**AC  
 Icae TTTCTGACC--AGTAA---GATC**CGG**--CA-----ATG**CCG**ATCAAC**G**GACC**GAGTT**AC  
 Asmi CTTTTGACC--ACCA-----GATC**CGG**C----AA-ATAG**CCG**ATTAAC**C**AACC**AAGTT**AC  
 Foal CTTCTGACA--TAAT---GATC**CGG**CC-----CG**CCG**ATTAAC**C**AAAC**GAGTT**AC  
 Drze ATTCTGACC--TTAT---GATC**CGG**C-----AAAG**CCG**ATTAAC**G**GACC**AAGTT**AC  
 Rhas T-TCTGACC--A-ACAA---GATC**CGG**CA-AC-----G**CCG**ATCAAC**G**GACC**GAGTT**AC  
 Elac AATCTGACCA-GAAAT---GACC**CGG**---C--A-A-AG**CCG**ATCAAC**C**AACC**CAGTT**AC  
 Kugu TATCTGACCA-TAAA-----GATC**CGG**CATG-----A**CCG**ATCAAC**G**GACC**GAGTT**AC  
 Plor TTTCTGACC--CATAT---GATC**CGG**C---AA-C--G**CCG**ATCAAC**G**GACC**GAGTT**AC  
 Sgun TT-CTGACCAATAA-----GATC**CGG**-CAAA-----G**CCG**ATCAAC**G**GACC**GAGTT**AC  
 Zaco T--CTGACCAATTA-----GATC**CGG**CAG-----TG**CCG**ATCAAC**C**AACC**CAGTT**AC  
 Zbfl T-TCTGACC--AATCAG---ATC**CGG**CAAAG-----**CCG**ATCAAC**G**GACC**GAGTT**AC  
 Spba T-TCTGACCTAAATT---GATC**CGG**CTAT-----G**CCG**ATTAAC**G**GACC**AAGTT**AC  
 Game CTTCTGACCAA---TAA---GATC**CGG**CAA-----CG--**CCG**ATCAAC**G**GACC**GAGTT**AC  
 Thth AT-CTGACCAA-TAA---GATC**CGG**CAAC-----G**CCG**ATCAAC**G**GACC**GAGTT**AC  
 Xigl --TCTGACCAATCAA-----GATC**CGG**CAATG-----**CCG**ATCAAC**G**GACC**AAGTT**AC  
 Hyja -TTTTGACCAATAA-----AGATC**CGG**CAAC-----G**CCG**ATCAAC**G**GACC**AAGTT**AC  
 Psan TTTTTGACCA-TAAACA---GATC**CGG**CA-----AAG**CCG**ATTAAC**G**GACC**AAGTT**AC  
 Cupa T-TCTGACC--AATAA---GATC**CGG**CAAC-----G**CCG**ATCAAC**G**GACC**GAGTT**AC  
 Mpch ATTCTGACCA-TTA-----GATC**CGG**CAAT-----G**CCG**ATCAAC**G**GACC**GAGTT**AC  
 Char -ATCTAACCA--AA-----AGATC**CGG**CATG-----G**CCG**ATCAAC**C**AACC**GAGTT**AC  
 Pser A-TCTGACCA-A-TAGA---GATC**CGG**CAA-----G**CCG**ATTAAC**C**AACC**AAGTT**AC  
 Prol ATTCTGACC--AAAC-T---GATC**CGG**C-----AACG**CCG**ATCAAC**C**AACC**AAGTT**AC  
 Plbi T-TCTGACC--AAAC-T---GATC**CGG**TA---A---AA**CCG**ATCAAC**C**AACC**AAGTT**AC  
 Calu A-TTCGACCT-A-TACT---GATC**CGG**CCCAA-----G**CCG**ATCAAC**G**GACC**AAGTT**AC  
 Papa CTTCTGACCC-ACCTT---GATC**CGG**C-----A-ACG**CCG**ATCAAT**C**AACC**AAGTT**AC  
 Suf r CATCTGAC---CTTAA---GATC**CGG**---C---A-AAG**CCG**ATCAAC**C**AACC**GAGTT**AC  
 Stci CTTCTGACCT-TACT-----GACC**CGG**CA-----C-CCG**CCG**ATCAAC**G**GACC**CAGTT**AC  
 Taru -ATCTGACCAATAA-----TGATC**CGG**CTAAA-----G**CCG**ATTAAC**C**AACC**GAGTT**AC  
 Rala T-TCTGACCT-A--TAT---GATC**CGG**--CAAT-----G**CCG**ATCAAC**G**GACC**GAGTT**AC

\* \*\* \*\*\*

|      | 43'    | 49                 | 50     | 50'              | 49'                   |
|------|--------|--------------------|--------|------------------|-----------------------|
| Scca | CCTAGG | GATAACAGCGCAATCCTT | -TTTCA | GAGTTCCT-ATCGAC  | AAAAGGGTTTACCAC       |
| Muma | CCTAGG | GATAACAGCGCAATCCTT | -TCTCA | GAGTTCCT-ATCGAA  | AAAAGGGTTTACCAC       |
| Erca | CCCAGG | GATAACAGCGCAATCCTT | -TCCAA | GAGCCCAA-ATCGAC  | AAAAGGGTTTACCAC       |
| Pose | CCCAGG | GATAACAGCGCAATCCTT | -TCCAA | GAGCCCGA-ATCGAC  | AAAAGGGTTTACCAC       |
| Actr | CCTAGG | GATAACAGCGCAATCCTT | -TCTAA | GAGTCCAT-ATCGAC  | AAAAGGGTTTACCAC       |
| Scal | CCTAGG | GATAACAGCGCAATCCTT | -TCTGA | GAGTCCAT-ATCGAC  | AAAAGGGTTTACCAC       |
| Posp | CCTAGG | GATAACAGCGCAATCCTT | -TCTAA | GAGTCCAT-ATCGAC  | AAAAGGGTTTACCAC       |
| Atsp | CCTAGG | GATAACAGCGCAATCCTT | -TCCCA | GAGTCCCT-ATCGAC  | AAAAGGGTTTACCAC       |
| Leoc | CCTAGG | GATAACAGCGCAATCCTT | -TCCCA | GAGTTCCT-ATCGAC  | AAAAGGGTTTACCAC       |
| Amca | CCTAGG | GATAACAGCGCAATCCTT | -TCCCA | GAGCCCAT-ATCGAC  | AAAAGGGTTTACCAC       |
| Osbi | CCCAGG | GATAACAGCGCAATCCTT | -TCCAA | GAGCCCAT-ATCGCC  | AAAAGGGTTTACCAC       |
| Pabu | CCTAGG | GATAACAGCGCAATCCTT | -TTTAA | GAGCCCAT-ATCGAC  | AAAAGGGTTTACCAC       |
| Hial | CCTAGG | GATAACAGCGCAATCCTT | -TCCCA | GAGTCCAT-ATCGAC  | AAAAGGGTTTACCAC       |
| Elha | CCCAGG | GATAACAGCGCAATCCTT | -TCCAA | GAGTCCCTA        | ATCGACAAAAGGGTTTACCAC |
| Mlcy | CCCAGG | GATAACAGCGCAATCCTT | -TCCAA | GAGTCCAT-ATCGAC  | AAAAGGGTTTACCAC       |
| Algl | CCTAGG | GATAACAGCGCAATCCTT | -TCTCA | GAGTTCAT-ATCGAC  | AAAAGGGTTTACCAC       |
| Ptgi | CCTAGG | GATAACAGCGCAATCCTT | -TCCCA | GAGTCCAT-ATCGAC  | AAAAGGGTTTACCAC       |
| Alaf | CCTAGG | GATAACAGCGCAATCCCT | -TCCCA | GAGTCCAT-ATCGAC  | GAAGGGGTTTACCAC       |
| Nock | CCTAGG | GATAACAGCGCAATCCCT | -TCCCA | GAGTCCAT-ATCGAC  | GAAGGGGTTTACCAC       |
| Anja | CCTAGG | GATAACAGCGCAATCCTT | -TCCCA | GAGTCCAT-ATCGAC  | AAAAGGGTTTACCAC       |
| Gyki | CCTAGG | GATAACAGCGCAATCCCC | -TCCCA | GAGTCCGT-ATCGAC  | GAGGGGGTTTACCAC       |
| Syka | CCTAGG | GATAACAGCGCAATCCTT | -TCCCA | GAGTCCAT-ATCGAC  | AAAAGGGTTTACCAC       |
| Opma | CCTAGG | GATAACAGCGCAATCCTT | -TCCCA | GAGTCCCT-ATCGAC  | AAAAGGGTTTACCAC       |
| Comy | CCTAGG | GATAACAGCGCAATCCTT | -TCCCA | GAGCCCAT-ATCGAAC | AAAAGGGTTTACCAC       |
| Sasp | CCTAGG | GATAACAGCGCTATCCTC | -TCCCA | GAGTTCAT-ATCGAC  | AAGAGGGTTTACCAC       |
| Eupe | CCTAGG | GATAACAGCGCTATCCTT | -TCCCA | GAGCCCAT-ATCGAC  | AAAAGGGTTTACCAC       |
| Enja | CCTAGG | GATAACAGCGCAATCCTC | -TCCCA | GAGTCCCT-ATCGAC  | GAGGGGGTTTACCAC       |
| Same | CCTAGG | GATAACAGCGCAATCCTC | -TCCCA | GAGTCCAT-ATCGAC  | GAGGGGGTTTACCAC       |
| Chch | CCTAGG | GATAACAGCGCAATCCTC | -TTTCA | GAGTCCAT-ATCGAC  | AAGAGGGTTTACCAC       |
| Grgr | CCTAGG | GATAACAGCGCAATCCCC | -TCCCA | GAGTCCCT-ATCGCC  | GAGGGGGTTTACCAC       |
| Caau | CCTAGG | GATAACAGCGCAATCCTC | -TCCCA | GAGTCCAT-ATCGAC  | GAGGGGGTTTACCAC       |
| Cyca | CCTAGG | GATAACAGCGCAATCCTC | -TCCCA | GAGTCCAT-ATCGAC  | GAGGGGGTTTACCAC       |
| Dare | CCTAGG | GATAACAGCGCAATCCTC | -TCTAA | GAGTCCAT-ATCGAC  | GAGGGGGTTTACCAC       |
| Cost | CCTAGG | GATAACAGCGCAATCCTC | -TCCCA | GAGTCCAT-ATCGAC  | GAGGGGGTTTACCAC       |
| Leec | CCTAGG | GATAACAGCGCAATCCCC | -TCCGA | GAGTTCAT-ATCGAC  | GAGAGGGTTTACCAC       |
| CrIa | CCTAGG | GATAACAGCGCAATCCTC | -TCCCA | GAGTCCAT-ATCGAC  | GAGAGGGTTTACCAC       |
| Clmc | CCTAGG | GATAACAGCGCAATCCCC | -TCCAA | GAGTTCAT-ATCGAC  | AAGGGGGTTTACCAC       |
| Phin | CCTAGG | GATAACAGCGCAATCCCC | -TTTCA | GAGTCCCT-ATCGAC  | AAGGGGGTTTACCAC       |
| Icpu | CCTAGG | GATAACAGCGCAATCCCC | -TTTCA | GAGTCCAT-ATCGAC  | AAGGGGGTTTACCAC       |
| Psto | CCTAGG | GATAACAGCGCAATCCCC | -TTTAA | GAGTCCAT-ATCGAC  | AAGGGGGTTTACCAC       |
| Cora | CCTAGG | GATAACAGCGCAATCCCC | -TTTTA | GAGTTCCT-ATCGAC  | AAGGGGGTTTACCAC       |
| Eisp | CCTAGG | GATAACAGCGCAATCCCC | -TCCCA | GAGTCCCT-ATCGAC  | AAGGGGGTTTACCAC       |
| Apal | CCTAGG | GATAACAGCGCAATCCCC | -TTTCA | GAGCCCTT-ATCGAC  | AAGGGGGTTTACCAC       |
| EsLu | CCTAGG | GATAACAGCGCAATCCCC | -TCCCA | GAGTCCCT-ATCGAC  | GAGGGGGTTTACCAC       |
| Dape | CCTAGG | GATAACAGCGCAATCCTC | -TCCCA | GAGTCCCT-ATCGAC  | GAGGGGGTTTACCAC       |
| Glse | CCTAGG | GATAACAGCGCAATCCCC | -TCCCA | GAGTCCCT-ATCGAC  | AAGGGGGTTTACCAC       |
| Naar | CCTAGG | GATAACAGCGCAATCCCC | -TCCCA | GAGTCCCT-ATCGAC  | AAGGGGGTTTACCAC       |
| Baoc | CCTAGG | GATAACAGCGCAATCCCC | -TCCCA | GAGTCCCT-ATCGAC  | AAGGGGGTTTACCAC       |
| Opso | CCTAGG | GATAACAGCGCAATCCTC | -TTTCA | GAGCCCTT-ATCGAC  | AAGGGGGTTTACCAC       |
| Alte | CCCAGG | GATAACAGCGCAATCCTC | -TCCCA | GAGTCCAT-ATCGAC  | GAGGGGGTTTACCAC       |
| Plap | CCCAGG | GATAACAGCGCAATCCTC | -TCCCA | GAGTCCAT-ATCGAC  | GAGGGGGTTTACCAC       |

Plal CCTAGG GATAACAG CGCAATCCTC -TCCA GAGTCCCT -ATC GAC GAGGGGGT TACCAC  
 Sami CCTAGG GATAACAG CGCAATCCTC -TCCA GAGTCCCT -ATC GAC GAGGGGGT TACCAC  
 Rere CCTAGG GATAACAG CGCAATCCTC -TCCA GAGTCCCT -ATC GAC GAGGGGGT TACCAC  
 Gama CCTAGG GATAACAG CGCAATCCTC -TCCA GAGTCCCT -ATC GAC GAGGGGGT TACCAC  
 Onmy CCTAGG GATAACAG CGCAATCCTC -TCCA GAGTCCCT -ATC GAC GAGGGGGT TACCAC  
 Sasa CCTAGG GATAACAG CGCAATCCTC -TCCA GAGTCCCT -ATC GAC GAGGGGGT TACCAC  
 Cola CCTAGG GATAACAG CGCAATCCTC -TCCA GAGTCCCT -ATC GAC GAGGGGGT TACCAC  
 Dita CCTGGG GATAACAG CGCAATCCTC -TCCA GAGTCCCT -ATC GAC GAGGGGGT TACCAC  
 Gogr CCTGGG GATAACAG CGCAATCCTC -TCCA GAGTCCCT -ATC GAC GAGGGGGT TACCAC  
 Chsl TCCAGG GATAACAG CGCAATCCTC -TCCA GAGTCCCT -ATC GAC GAGGGGGT TACCAC  
 Atja CCCAGG GATAACAG CGCAATCCTC -TCCA GAGTCCCT -ATC GAC GAGGGGGT TACCAC  
 Iido CCCAGG GATAACAG CGCAATCCTC -TCCA GAGTCCCT -ATC GAC GAGGGGGT TACCAC  
 Auja CCTAGG GATAACAG CGCAATCCTC -TCCA GAGTCCCT -ATC GAC GAGGGGGT TACCAC  
 Chag CCCAGG GATAACAG CGCAATCCTC -TCCA GAGTCCCT -ATC GAC GAGGGGGT TACCAC  
 Hami CCTAGG GATAACAG CGCAATCCTC -TCCA GAGTCCCT -ATC GAC GAGGGGGT TACCAC  
 Saun CCTAGG GATAACAG CGCAATCCTC -TCCA GAGTCCCT -ATC GAC GAGGGGGT TACCAC  
 Nema CCTAGG GATAACAG CGCAATCCTC -TCCA GAGTCCCT -ATC GAC GAGGGGGT TACCAC  
 Disp CCTAGG GATAACAG CGCAATCCTC -TCCA GAGTCCCT -ATC GAC GAGGGGGT TACCAC  
 Myaf CCTAGG GATAACAG CGCAATCCTC -TCCA GAGTCCCT -ATC GAC GAGGGGGT TACCAC  
 Lagu CCCAGG GATAACAG CGCAATCCTC -TCCA GAGTCCCT -ATC GAC GAGGGGGT TACCAC  
 Trtr CCTAGG GATAACAG CGCAATCCTC -TCCA GAGTCCCT -ATC GAC GAGGGGGT TACCAC  
 Zucr CCTAGG GATAACAG CGCAATCCTC -TCCA GAGTCCCT -ATC GAC GAGGGGGT TACCAC  
 Pxja CCTAGG GATAACAG CGCAATCCTC -TCCA GAGTCCCT -ATC GAC GAGGGGGT TACCAC  
 Pxlo CCTAGG GATAACAG CGCAATCCTC -TCCA GAGTCCCT -ATC GAC GAGGGGGT TACCAC  
 Pctr CCTAGG GATAACAG CGCAATCCTC -TCCA GAGTCCCT -ATC GAC GAGGGGGT TACCAC  
 Apsa CCTAGG GATAACAG CGCAATCCTC -TCCA GAGTCCCT -ATC GAC GAGGGGGT TACCAC  
 Cabe CCCAGG GATAACAG CGCAATCCTC -TCCA GAGTCCCT -ATC GAC GAGGGGGT TACCAC  
 Bzze CCTAGG GATAACAG CGCAATCCTC -TCCA GAGTCCCT -ATC GAC GAGGGGGT TACCAC  
 Siim CCTAGG GATAACAG CGCAATCCTC -TCCA GAGTCCCT -ATC GAC GAGGGGGT TACCAC  
 Ctru CCTAGG GATAACAG CGCAATCCTC -TCCA GAGTCCCT -ATC GAC GAGGGGGT TACCAC  
 Dpbr CCTAGG GATAACAG CGCAATCCTC -TCCA GAGTCCCT -ATC GAC GAGGGGGT TACCAC  
 Caki CCCAGG GATAACAG CGCAATCCTC -TCCA GAGTCCCT -ATC GAC GAGGGGGT TACCAC  
 Phja CCCAGG GATAACAG CGCAATCCTC -TCCA GAGTCCCT -ATC GAC GAGGGGGT TACCAC  
 Brsp CCTAGG GATAACAG CGCAATCCTC -TCCA GAGTCCCT -ATC GAC GAGGGGGT TACCAC  
 Gamo CCTAGG GATAACAG CGCAATCCTC -TCCA GAGTCCCT -ATC GAC GAGGGGGT TACCAC  
 Lolo CCCAGG GATAACAG CGCAATCCTC -TCCA GAGTCCCT -ATC GAC GAGGGGGT TACCAC  
 Batr CCCGGG GATAACAG CGCAATCCTC -TCCA GAGTCCCT -ATC GAC GAGGGGGT TACCAC  
 Prmy CCCAGG GATAACAG CGCAATCCTC -TCCA GAGTCCCT -ATC GAC GAGGGGGT TACCAC  
 Loli CCTAGG GATAACAG CGCAATCCTC -TCCA GAGTCCCT -ATC GAC GAGGGGGT TACCAC  
 Loam CCTAGG GATAACAG CGCAATCCTC -TCCA GAGTCCCT -ATC GAC GAGGGGGT TACCAC  
 Chab CCCAGG GATAACAG CGCAATCCTC -TCCA GAGTCCCT -ATC GAC GAGGGGGT TACCAC  
 Chto CCCAGG GATAACAG CGCAATCCTC -TCCA GAGTCCCT -ATC GAC GAGGGGGT TACCAC  
 Majo CCCAGG GATAACAG CGCAATCCTC -TCCA GAGTCCCT -ATC GAC GAGGGGGT TACCAC  
 HLst CCCAGG GATAACAG CGCAATCCTC -TCCA GAGTCCCT -ATC GAC GAGGGGGT TACCAC  
 Clpe CCTAGG GATAACAG CGCAATCCTC -TCCA GAGTCCCT -ATC GAC GAGGGGGT TACCAC  
 Mlmr CCTAGG GATAACAG CGCAATCCTC -TCCA GAGTCCCT -ATC GAC GAGGGGGT TACCAC  
 Cr cr CCCAGG GATAACAG CGCAATCCTC -TCCA GAGTCCCT -ATC GAC GAGGGGGT TACCAC  
 Muce CCCAGG GATAACAG CGCAATCCTC -TCCA GAGTCCCT -ATC GAC GAGGGGGT TACCAC  
 Bege CCCAGG GATAACAG CGCAATCCTC -TCCA GAGTCCCT -ATC GAC GAGGGGGT TACCAC  
 Mela CCCAGG GATAACAG CGCAATCCTC -TCCA GAGTCCCT -ATC GAC GAGGGGGT TACCAC  
 Hats CCCAGG GATAACAG CGCAATCCTC -TCCA GAGTCCCT -ATC GAC GAGGGGGT TACCAC  
 Or la CCCAGG GATAACAG CGCAATCCTC -TCCA GAGTCCCT -ATC GAC GAGGGGGT TACCAC



Cosa CCTAGG GATAACAG CGCAATCCCC -TCCTA GAGCCCAT -ATC GAC GAGAGGGTT TACCAC  
 Exsp CCTAGG GATAACAG CGCAATCCCC -TTTGA GAGCCCAT -ATC GAC AAGGGGGTT TACCAC  
 Depa CCTAGG GATAACAG CGCAATCCTC -TCCTA GAGACCCT -ATC GAC GAGAGGGTT TACCAC  
 Rima CCCAGG GATAACAG CGCAATCCCC -TTCTA GAGCCCCT -ATC GAC AAGGGGGTT TACCAC  
 Fuol CCTAGG GATAACAG CGCAATCCCC -TCTTA GAGTCCCT -ATC GAC GAGGGGGTT TACCAC  
 Gmaf CCTAGG GATAACAG CGCAATCCCC -TTTCA GAGCCCCT -ATC GAC GAGGGGGTT TACCAC  
 Xeei CCTAGG GATAACAG CGCAATCCTC -TTTGA GAGCCCAT -ATC GAC AAGAGGGTT TACCAC  
 Pros CCTAGG GATAACAG CGCAATCCCC -TCCA GAGCCCAT -ATC GAC GAGGGGGTT TACCAC  
 Scmi TCTAGG GATAACAG CGCAATCCCC -TCCA GAGCCCAT -ATC GAC GAGGGGGTT TACCAC  
 Rolo CCTAGG GATAACAG CGCAATCCCC -TTCCA GAGCCCAT -ATC GAC AAGGGGGTT TACCAC  
 Cere CCTAGG GATAACAG CGCAATCCCC -TTCCA GAGCCCAT -ATC GAC AAGGGGGTT TACCAC  
 Daga CCCAGG GATAACAG CGCAATCCCC -TTTGA GAGCCCAT -ATC GAC AAGGGGGTT TACCAC  
 Anco CCTAGG GATAACAG CGCAATCCTC -TTCCA GAGCCCAT -ATC GAC AAGGGGGTT TACCAC  
 Dmve CCTAGG GATAACAG CGCAATCCTC -TTCCA GAGCCCAT -ATC TAC AAGAGGGTT TACCAC  
 Dmar CCTAGG GATAACAG CGCAATCCTC -TTCCA GAGCCCAT -ATC TAC AAGAGGGTT TACCAC  
 Anka CCTAGG GATAACAG CGCAATCCTC -TTCCA GAGCCCAT -ATC GAC AAGAGGGTT TACCAC  
 Moja CCTAGG GATAACAG CGCAATCCTC -TTCCA GAGCCCAT -ATC GAC AAGAGGGTT TACCAC  
 Hoja CCTAGG GATAACAG CGCAATCCTC -TTCCA GAGCCCAT -ATC GAC AAGAGGGTT TACCAC  
 Bede CCTAGG GATAACAG CGCAATCCCC -TTCCA GAGCCCAT -ATC GAC AAGGGGGTT TACCAC  
 Bsp CCTAGG GATAACAG CGCAATCCCC -TTCCA GAGCCCAT -ATC GAC AAGGGGGTT TACCAC  
 Mysp CCCAGG GATAACAG CGCAATCCCC -TCCA GAGCCCAT -ATC GAC GAGGGGGTT TACCAC  
 Osja CCCAGG GATAACAG CGCAATCCCC -TCCA GAGCCCAT -ATC GAC GAGGGGGTT TACCAC  
 Sgro CCCAGG GATAACAG CGCAATCCCC -TCCA GAGCCCAT -ATC GAC GAGGGGGTT TACCAC  
 Pzpa CCCAGG GATAACAG CGCAATCCTC -TTACA GAGCCCAT -ATC GAC AAGGGGGTT TACCAC  
 Zeja CCTAGG GATAACAG CGCAATACCC -TTCCA GAGCCCAT -ATC GAC AAGGGAGCT TACCAC  
 Znne CCTAGG GATAACAG CGCAATCCCC -TTCCA GAGCCCAT -ATC GAC AAGGGGGTT TACCAC  
 Zefa CCTAGG GATAACAG CGCAATCCCC -TTCCA GAGCCCAT -ATC GAC AAGGGGGTT TACCAC  
 Acni CCTAGG GATAACAG CGCAATCCCC -TTCCA GAGCCCAT -ATC GAC AAGGGGGTT TACCAC  
 Ncrh CCTAGG GATAACAG CGCAATCCCC -TTCCA GAGCCCAT -ATC GAC AAGGGGGTT TACCAC  
 Agca CCTAGG GATAACAG CGCAATCCCC -TTTGA GAGCCCAT -ATC GAC AAGGGGGTT TACCAC  
 Hydy CCTAGG GATAACAG CGCAATCCTC -TTTGA GAGCCCAT -ATC GAC AAGGGGGTT TACCAC  
 Gsac CCTAGG GATAACAG CGCAATCCTC -TTTGA GAGCCCAT -ATC GAC AAGGGGGTT TACCAC  
 Pevo CCTAGG GATAACAG CGCAATCCTC -TTATA GAGTCCAT -ATC GAC AAGGGGGTT TACCAC  
 Hiku CCCAGG GATAACAG CGCAATTCTC -TTTGA GAGTCCCT -ATC GAC AAGAGAGTT TACCAC  
 Inpa CCCGGG GATAACAG CGCAATCCCC -TTTCA GAGCCCCT -ATC GAC AAGGGGGTT TACCAC  
 Auch CCTAGG GATAACAG CGCTATCCCC -TTACA GAGACCCT -ATC GAC AAGGGGGTT TACCAC  
 Fico CCTAGG GATAACAG CGCAATCCCC -TTCCA GAGTCCCT -ATC GAC AAGGGGGTT TACCAC  
 Macs CCTAGG GATAACAG CGCAATCCCC -TTCTA GAGTCCCT -ATC GAC AAGGGGGTT TACCAC  
 Moal CCCAGG GATAACAG CGCAATCCCC -TTTGA GAGCCCGT -ATC GAC AAGGGGGTT TACCAC  
 Syma CCCAGG GATAACAG CGCAATCCCC -TTTAA GAGCCCAT -ATC GAC AAGGGGGTT TACCAC  
 Mafr CCCAGG GATAACAG CGCAATCCCC -TTCAA GAGCCCAT -ATC GAC AAGGGGGTT TACCAC  
 Dcpe CCCAGG GATAACAG CGCAATCCCC -TTTGA GAGACCCT -ATC GAC AAGGGGGTT TACCAC  
 Dcti CCCAGG GATAACAG CGCAATCCCC -TTTGA GAGACCCT -ATC GAC AAGGGGGTT TACCAC  
 Hehi CCTAGG GATAACAG CGCAATCCCC -TTTGA GAGCCCAT -ATC GAC AAGGGGGTT TACCAC  
 Stam CCTAGG GATAACAG CGCAATCCCC -TTTGA GAGCCCAT -ATC GAC AAGGGGGTT TACCAC  
 Hogi CCTAGG GATAACAG CGCAATCCCC -TTTGA GAGCCCAT -ATC GAC AAGGGGGTT TACCAC  
 Erzo CCTAGG GATAACAG CGCAATCCTC -TTTGA GAGCCCAT -ATC GAC AAGGGGGTT TACCAC  
 Hxot CCTAGG GATAACAG CGCAATCCTC -TTTGA GAGCCCAT -ATC GAC AAGGGGGTT TACCAC  
 Core CCTAGG GATAACAG CGCAATCCTC -TTTGA GAGCCCAT -ATC GAC AAGGGGGTT TACCAC  
 Apve CCTAGG GATAACAG CGCAATCCTC -TTTGA GAGCCCAT -ATC GAC AAGGGGGTT TACCAC  
 Latj CCTAGG GATAACAG CGCAATCCCC -TTTGA GAGCCCAT -ATC GAC AAGGGGGTT TACCAC  
 Laja CCTAGG GATAACAG CGCAATCCCC -TTTGA GAGCCCAT -ATC GAC AAGGGGGTT TACCAC

Syja CCCAGG GATAACAG CGCAATCCCC -TTCTA GAGCCCAT -ATC GAC AAGGGGGT TACCAC  
 Epme CCTAGG GATAACAG CGCAATCTCC -TCTTA GAGCCCAT -ATC AAC GAGGAGGT TACCAC  
 Grse CCTAGG GATAACAG CGCAATCCCC -TTT TA GAGCCCAT -ATC GAC AAGGGGGT TACCAC  
 Clja CCTAGG GATAACAG CGCAATCTCC -TCCA GAGTCCAT -ATC GCC GAGTGGGT TACCAC  
 Ogcy CCCAGG GATAACAG CGCAATCCCC -TTCCA GAGCCCAT -ATC GAC AAGGGGGT TACCAC  
 Plna TCTAGG GATAACAG CGCAATCTCC -TTCAA GAGCCCCT -ATC GAC AAGGAGGT TACCAC  
 Lema CCTAGG GATAACAG CGCAATCTCC -TTT TA GAGCCCAT -ATC GAC AAGAGGGT TACCAC  
 Etzo TCTAGG GATAACAG CGCAATCCCC -TTT TA GAGCCCAT -ATC GAC AAGGGGGT TACCAC  
 Apse CCTAGG GATAACAG CGCAATCCCC -TTCTA GAGCCCAT -ATC GAC AAGGGGGT TACCAC  
 Epde CCTAGG GATAACAG CGCAATCCCC -TTT TA GAGCCCAT -ATC GAC AAGGGGGT TACCAC  
 Slja CCTAGG GATAACAG CGCAATCTCC -TTT TA GAGTCAT -ATC GAC AAGAGGGT TACCAC  
 Bsja CCTAGG GATAACAG CGCAATCCCC -TTT TA GAGCCCAT -ATC GAC AAGGGGGT TACCAC  
 Ecna CCTAGG GATAACAG CGCAATCCCC -TTT TA GAGCCCTT -ATC AAC AAGGGGGT TACCAC  
 Cohi CCTAGG GATAACAG CGCAATCCCC -TTT TA GAGCCAC -ATC AAC AAGGGGGT TACCAC  
 Caar CCTAGG GATAACAG CGCAATCCCC -TTT TA GAGCCCAT -ATC GAC AAGGGGGT TACCAC  
 Came CCTAGG GATAACAG CGCAATCCCC -TTT TA GAGCCCAT -ATC GAC AAGGGGGT TACCAC  
 Mema CCTAGG GATAACAG CGCAATCCCC -TTT TA GAGCCCAT -ATC GAC AAGGGGGT TACCAC  
 Lenu CCTAGG GATAACAG CGCAATCTCC -TTCCA GAGTCCAT -ATC GAC AAGAGGGT TACCAC  
 Brja CCTAGG GATAACAG CGCAATCTCC -TTT TA GAGCCCAT -ATC GAC AAGAGGGT TACCAC  
 Plma CCTAGG GATAACAG CGCAATCCCC -TTT TA GAGCCCAT -ATC GAC AAGGGGGT TACCAC  
 Emst CCTAGG GATAACAG CGCAATCCCC -TTT TA GAGCCCAT -ATC GAC AAGGGGGT TACCAC  
 Ptti CCTAGG GATAACAG CGCAATCCCC -TTT TA GAGCCCAT -ATC GAC AAGGGGGT TACCAC  
 Losu CCTAGG GATAACAG CGCAATCCCC -TTT TA GAGCCCAT -ATC GAC AAGGGGGT TACCAC  
 Geoy CCTAGG GATAACAG CGCAATCTCC -TTTCA GAGTCCT -ATC GAC AAGAGGGT TACCAC  
 Dipi CCTAGG GATAACAG CGCAATCCCC -TTCTA GAGCCCAT -ATC GAC AAGGGGGT TACCAC  
 Pama CCTAGG GATAACAG CGCAATCCCC -TTTAA GAGCCCTT -ATC GAC AAGGGGGT TACCAC  
 Leob CCTAGG GATAACAG CGCAATCTCC -TTT TA GAGCCCAT -ATC GAC AAGGAGGT TACCAC  
 Neba CCCAGG GATAACAG CGCAATCCCC -TTTAA GAGTCCTT -ATC GAC AAGGGGGT TACCAC  
 Pdpi CCCAGG GATAACAG CGCAATCCCC -TTT TA GAGCCCAT -ATC AAC AAGGGGGT TACCAC  
 Nimi CCTAGG GATAACAG CGCTATCTCC -TTTCA GAGCCCC -ATC GAC AAGAGGGT TACCAC  
 Uptr CCCAGG GATAACAG CGCAATCCCC -TCTAA GAGACCCT -ATC GAT GAGAGGGT TACCAC  
 Pesc CCCAGG GATAACAG CGCAATCTCC -TCTTA GAGACCAT -ATC GAC GAGTGGGT TACCAC  
 Baar CCTAGG GATAACAG CGCAATCCCC -TTCTA GAGCCCTT -ATC AAC AAGGGGGT TACCAC  
 Moar CCTAGG GATAACAG CGCAATCCCC -TTT TA GAGCCCAT -ATC GAC AAGGGGGT TACCAC  
 Toja CCTAGG GATAACAG CGCAATCCCC -TTT TA GAGCCCAT -ATC GAC AAGGGGGT TACCAC  
 Chau CCTAGG GATAACAG CGCAATCCCC -TTCTA GAGCCCAT -ATC GAC AAGGGGGT TACCAC  
 Chse CCCAGG GATAACAG CGCAATCCCC -TTT TA GAGCCCAT -ATC GAC AAGGGGGT TACCAC  
 Enar CCTAGG GATAACAG CGCAATCCCC -TTT TA GAGCCCAT -ATC GAC AAGGGGGT TACCAC  
 Hpty CCTAGG GATAACAG CGCAATCCCC -TTT TA GAGCCCAT -ATC GAC AAGGGGGT TACCAC  
 Nana CCTAGG GATAACAG CGCAATCTCC -TTT TA GAGCCCAT -ATC GAC AAGAGGGT TACCAC  
 Mcst CCTAGG GATAACAG CGCAATCCCC -TTT TA GAGCCCAT -ATC GAC AAGGGGGT TACCAC  
 Rhox CCTAGG GATAACAG CGCAATCCCC -TTT TA GAGCCCAT -ATC GAC AAGGGGGT TACCAC  
 Opfa CCTAGG GATAACAG CGCAATCTCC -TTT TA GAGCCCAT -ATC GAC AAGAGGGT TACCAC  
 Paar CCTAGG GATAACAG CGCAATCCCC -TTTCA GAGCCCAT -ATC GAC AAGGGGGT TACCAC  
 Gozo CCTAGG GATAACAG CGCAATCCCC -TTT TA GAGCCCAT -ATC GAC AAGGGGGT TACCAC  
 Ackr CCTAGG GATAACAG CGCAATCTCC -TTT TA GAGCCAT -ATC GAC AAGGGGGT TACCAC  
 Elev CCTAGG GATAACAG CGCAATCCCC -TTTAA GAGCCCAT -ATC GAC AAGGGGGT TACCAC  
 Trdu CCTAGG GATAACAG CGCAATCTCC -TTT TA GAGCCCAT -ATC GAC AAGAGGGT TACCAC  
 Amoc CCCAGG GATAACAG CGCAATCTCC -TTT TA GAGCCCAT -ATC GAC AAGAGGGT TACCAC  
 Hame CCTAGG GATAACAG CGCAATCCCC -TTATA GAGTCCT -ATC GAC AAGGGGGT TACCAC  
 Chso CCTAGG GATAACAG CGCAATCTCC -TTT CGA GAGTCCAT -ATC GAC GAGAAGGT TACCAC  
 Lyto CCTAGG GATAACAG CGCAATCTCC -TTT TA GAGCCCAT -ATC GAC AAGGGGGT TACCAC



|      | 51       | 52          | 52'        | 53                          |      |
|------|----------|-------------|------------|-----------------------------|------|
| Scca | CTCGATGT | TGGATCAGGAC | ATCCTAATGG | -TCCAACC-GCTA-TTAAGGGTCGTT  | TGTT |
| Muma | CTCGATGT | TGGATCAGGAC | ATCCTAATGG | -TCCAACC-GCTA-TTAAGGGTCGTT  | TGTT |
| Erca | CTCGATGT | TGGATCAGGAC | ATCCTAATGG | -TGCAGCC-GCTA-TTAAGGGTCGTT  | TGTT |
| Pose | CTCGATGT | TGGATCAGGAC | ATCCTAATGG | -TGCAGCC-GCTA-TTAAGGGTCGTT  | TGTT |
| Actr | CTCGATGT | TGGATCAGGAC | ATCCTAATGG | -TGCAGCC-GCTA-TTAAGGGTCGTT  | TGTT |
| Scal | CTCGATGT | TGGATCAGGAC | ATCCTAATGG | -TGCAGCC-GCTA-TTAAGGGTCGTT  | TGTT |
| Posp | CTCGATGT | TGGATCAGGAC | ATCCTAATGG | -TGCAGCC-GCTA-TTAAGGGTCGTT  | TGTT |
| Atsp | CTCGATGT | TGGATCAGGAC | ATCCTAATGG | -TGCAGCC-GCTA-TTAAGGGTCGTT  | TGTT |
| Leoc | CTCGATGT | TGGATCAGGAC | ATCCTAATGG | -TGCAGCA-GCTA-TTAAGGGTCGTT  | TGTT |
| Amca | CTCGATGT | TGGATCAGGAC | ATCCTAATGG | -TGCAGCC-GCTA-TTAAGGGTCGTT  | TGTT |
| Osbi | CTCGATGT | TGGATCAGGAC | ATCCTAATGG | -CGAAAA-TCTA-TTAAGGGTCGTT   | TGTT |
| Pabu | CTCGATGT | TGGATCAGGAC | ATCCTAGTGG | -CGAAAA-TTTA-CTAAGGGTCGTT   | TGTT |
| Hial | CTCGATGT | TGGATCAGGAC | ATCCTAATGG | -CCAGCA-GCTA-TTAAGGGTCGTT   | TGTT |
| Elha | CTCGATGT | TGGATCAGGAC | ATCCTAATGG | -TGCAGCC-GCTA-TTAAGGGTCGTT  | TGTT |
| Mlcy | CTCGATGT | TGGATCAGGAC | ATCCTAATGG | -TGCAGCC-GCTA-TTAAGGGTCGTT  | TGTT |
| Algl | CTCGATGT | TGGATCGGGAC | ATCCTAATGG | -TGCAGCC-GCTA-TTAAGGGTCGTT  | TGTT |
| Ptgi | CTCGATGT | TGGATCAGGAC | ATCCTAATGG | -TGCAGCC-GCTA-TTAAGGGTCGTT  | TGTT |
| Alaf | CTCGATGT | TGGATCAGGAC | ATCCTAATGG | -TGCAGCC-GCTA-TTAAGGGTCGTT  | TGTT |
| Nock | CTCGATGT | TGGATCAGGAC | ATCCTAATGG | -TGCAGCC-GCTA-TTAAGGGTCGTT  | TGTT |
| Anja | CTCGATGT | TGGATCAGGAC | ATCCTAATGG | G-TGCAGCC-GCTA-TTAAGGGTCGTT | TGTT |
| Gyki | CTCGATGT | TGGATCAGGAC | ATCCTAATGG | -TGCAGCC-GCTA-TTAAGGGTCGTT  | TGTT |
| Syka | CTCGATGT | TGGATCAGGAC | ATCCTAATAG | -TGCAGCC-GCTA-TTAAGGGTCGTT  | TGTT |
| Opma | CTCGATGT | TGGATCAGGAC | ATCCTAATGG | -TGAAGCC-GTTA-TTAAGGGTCGTT  | TGTT |
| Comy | CTCGATGT | TGGATCAGGGC | ATCCTAACCG | -TGCAGCC-GCTC-TTAAGGGTCGTT  | TGTT |
| Sasp | CTCGATGT | TGGATCAGGAC | ATCCTAATGG | -TGCAGCC-GCTA-TTAAGGGTCGTT  | TGTT |
| Eupe | CTCGATGT | TGGATCAGGAC | ATCCTAATGG | -TGCAGCC-GCTA-TTAAGGGTCGTT  | TGTT |
| Enja | CTCGATGT | TGGATCAGGAC | ATCCTAATGG | -TGCAGCC-GCTA-TTAAGGGTCGTT  | TGTT |
| Same | CTCGATGT | TGGATCAGGAC | ATCCTAATGG | -TGCAGCC-GCTA-TTAAGGGTCGTT  | TGTT |
| Chch | CTCGATGT | TGGATCAGGAC | ATCCTAATGG | -TGCAGCC-GCTA-TTAAGGGTCGTT  | TGTT |
| Grgr | CTCGATGT | TGGATCAGGAC | ATCCTAATGG | -CCAGCC-GCTA-TTAAGGGTCGTT   | TGTT |
| Caau | CTCGATGT | TGGATCAGGAC | ATCCTAATGG | -TGCAGCC-GCTA-TTAAGGGTCGTT  | TGTT |
| Cyca | CTCGATGT | TGGATCAGGAC | ATCCTAATGG | -TGCAGCC-GCTA-TTAAGGGTCGTT  | TGTT |
| Dare | CTCGATGT | TGGATCAGGAC | ATCCTAATGG | -TGCAGCC-GCTA-TTAAGGGTCGTT  | TGTT |
| Cost | CTCGATGT | TGGATCAGGAC | ATCCTAATGG | -TGCAGCC-GCTA-TTAAGGGTCGTT  | TGTT |
| Leec | CTCGATGT | TGGATCAGGAC | ATCCTAATGG | -TGCAGCC-GCTA-TTAAGGGTCGTT  | TGTT |
| CrIa | CTCGATGT | TGGATCAGGAC | ATCCTAATGG | -TGCAGCC-GCTA-TTAAGGGTCGTT  | TGTT |
| Clmc | CTCGATGT | TGGATCAGGAC | ATCCTAATGG | -TGCAGCC-GCTA-TTAAGGGTCGTT  | TGTT |
| Phin | CTCGATGT | TGGATCAGGAC | ATCCTAATGG | -CCAGCC-GCTA-TTAAGGGTCGTT   | TGTT |
| Icpu | CTCGATGT | TGGATCAGGAC | ATCCTAATGG | -TGCAGCC-GCTA-TTAAGGGTCGTT  | TGTT |
| Psto | CTCGATGT | TGGATCAGGAC | ATCCTAATGG | -TGCAGCC-GCTA-TTAAGGGTCGTT  | TGTT |
| Cora | CTCGATGT | TGGATCAGGAC | ATCCTAATGG | -TGCAGCC-GCTA-TTAAGGGTCGTT  | TGTT |
| Eisp | CTCGATGT | TGGATCAGGAC | ATCCTATTGG | -TGCAGCC-GCTA-TTAAGGGTCGTT  | TGTT |
| Apal | CTCGATGT | TGGATCAGGAC | ATCCTAATGG | -TGCAGCC-GCTA-TTAAGGGTCGTT  | TGTT |
| EsLu | CTCGATGT | TGGATCAGGAC | ATCCTAATGG | -TGCAGCC-GCTA-TTAAGGGTCGTT  | TGTT |
| Dape | CTCGATGT | TGGATCAGGAC | ATCCTAATGG | -TGCAGCC-GCTA-TTAAGGGTCGTT  | TGTT |
| Glse | CTCGATGT | TGGATCAGGAC | ATCCTAATGG | -TCCAACC-GCTA-TTAAGGGTCGTT  | TGTT |
| Naar | CTCGATGT | TGGATCAGGAC | ATCCTAATGG | -TCCAACC-GCTA-TTAAGGGTCGTT  | TGTT |
| Baoc | CTCGATGT | TGGATCAGGAC | ATCCTAATGG | -TCCAACC-GCTA-TTAAGGGTCGTT  | TGTT |
| Opso | CTCGATGT | TGGATCAGGAC | ATCCTAATGG | -TGCAGCC-GCTA-TTAAGGGTCGTT  | TGTT |
| Alte | CTCGATGT | TGGATCAGGAC | ATCCTAATGG | -TGCAGCC-GCTA-TTAAGGGTCGTT  | TGTT |
| Plap | CTCGATGT | TGGATCAGGAC | ATCCTAATGG | -TGCAGCC-GCTA-TTAAGGGTCGTT  | TGTT |

|      |          |             |            |          |       |          |       |      |
|------|----------|-------------|------------|----------|-------|----------|-------|------|
| PlaI | CTCGATGT | TGGATCAGGAC | ATCCTATTGG | -TGCAGCC | -GCTA | -ATAAGGG | TCGTT | TGTT |
| Sami | CTCGATGT | TGGATCAGGAC | ATCCTATTGG | -TGCAGCC | -GCTA | -ATAAGGG | TCGTT | TGTT |
| Rere | CTCGATGT | TGGATCAGGAC | ATCCTATTGG | -TGCAGCC | -GCTA | -ATAAGGG | TCGTT | TGTT |
| Gama | CTCGATGT | TGGATCAGGAC | ATCCTAATGG | -TGCAGCC | -GCTA | -TTAAGGG | TCGTT | TGTT |
| Onmy | CTCGATGT | TGGATCAGGAC | ATCCTAATGG | -TGCAGCC | -GCTA | -TTAAGGG | TCGTT | TGTT |
| Sasa | CTCGATGT | TGGATCAGGAC | ATCCTAATGG | -TGCAGCC | -GCTA | -TTAAGGG | TCGTT | TGTT |
| Cola | CTCGATGT | TGGATCAGGAC | ATCCTAATGG | -TGCAGCC | -GCTA | -TTAAGGG | TCGTT | TGTT |
| Dita | CTCGATGT | TGGATCAGGAC | ATCCCAGTGG | -TGCAGCC | -GCTA | -CTAAGGG | TCGTT | TGTT |
| Gogr | CTCGATGT | TGGATCAGGAC | ACCCCAATGG | -TGCAGCC | -GCCA | -TTAAGGG | TCGTT | TGTT |
| ChsI | CTCGATGT | TGGATCAGGGC | ATCCTAATGG | -TGCAGCC | -GCTA | -TTAAGGG | TCGTT | TGTT |
| Atja | CTCGATGT | TGGATCAGGAC | ATCCTAATGG | -TGCAGCC | -GCTA | -TTAAGGG | TCGTT | TGTT |
| Iido | CTCGATGT | TGGATCAGGAC | ATCCTAATGG | -TGCAGCC | -GCTA | -TTAAGGG | TCGTT | TGTT |
| Auja | CTCGATGT | TGGATCAGGAC | ATCCTAATGG | -TGCAGCC | -GCTA | -TTAAGGG | TCGTT | TGTT |
| Chag | CTCGATGT | TGGATCAGGAC | ATCCTAATGG | -TGCAGCC | -GCTA | -TTAAGGG | TCGTT | TGTT |
| Hami | CTCGATGT | TGGATCAGGAC | ATCCTAATGG | -TGCAGCC | -GCTA | -TTAAGGG | TCGTT | TGTT |
| Saun | CTCGATGT | TGGATCAGGAC | ATCCTAATGG | -TGCAGCC | -GCTA | -TTAAGGG | TCGTT | TGTT |
| Nema | CTCGATGT | TGGATCAGGAC | ATCCTAATGG | -TGCAGCC | -GCTA | -TTAAGGG | TCGTT | TGTT |
| Disp | CTCGATGT | TGGATCAGGAC | ATCCTAATGG | -TGCAGCC | -GCTA | -TTAAGGG | TCGTT | TGTT |
| Myaf | CTCGATGT | TGGATCAGGAC | ATCCTGATGG | -TGCAGCC | -GCTA | -TCAAGGG | TCGTT | TGTT |
| Lagu | CTCGATGT | TGGATCAGGAT | GTCTAATGG  | -TGCAGCC | -GCTA | -TTAAGGG | TCGTT | TGTT |
| Trtr | CTCGATGT | TGGATCAGGAT | ATCTAATGG  | -TGCAGCC | -GCTA | -TTAAGGG | TCGTT | TGTT |
| Zucr | CTCGATGT | TGGATCAGGAT | ATCTAATGG  | -TGCAGCC | -GCTA | -TTAAGGG | TCGTT | TGTT |
| Pxja | CTCGATGT | TGGATCAGGAC | ATCTAATGG  | -TGCAGCC | -GCTA | -TTAAGGG | TCGTT | TGTT |
| Pxlo | CTCGATGT | TGGATCAGGAC | ATCTAATGG  | -TGCAGCC | -GCTA | -TTAAGGG | TCGTT | TGTT |
| Pctr | CTCGATGT | TGGATCAGGAC | ATCTAATGG  | -TGCAGCC | -GCTA | -TTAAGGG | TCGTT | TGTT |
| Apsa | CTCGATGT | TGGATCAGGAC | ATCTAATGG  | -TGCAGCC | -GCTA | -TTAAGGG | TCGTT | TGTT |
| Cabe | CTCGATGT | TGGATCAGGAC | ATCTAATGG  | -TGCAGCC | -GCTA | -TTAAGGG | TCGTT | TGTT |
| Bzze | CTCGATGT | TGGATCAGGAC | ATCTAATGG  | -TGCAGCC | -GCTA | -TTAAGGG | TCGTT | TGTT |
| Siim | CTCGATGT | TGGATCAGGAC | ATCTAATGG  | -TGCAGCC | -GCTA | -TTAAGGG | TCGTT | TGTT |
| Ctru | CTCGATGT | TGGATCAGGAC | ATCTAATGG  | -TGCAGCC | -GCTA | -TTAAGGG | TCGTT | TGTT |
| Dpbr | CTCGATGT | TGGATCAGGAC | ATCTAATGG  | -TGCAGCC | -GCTA | -TTAAGGG | TCGTT | TGTT |
| Caki | CTCGATGT | TGGATCAGGAC | ATCTAATGG  | -TGCAGCC | -GCTA | -TTAAGGG | TCGTT | TGTT |
| Phja | CTCGATGT | TGGATCAGGAC | ATCTAATGG  | -TGCAGCC | -GCTA | -TTAAGGG | TCGTT | TGTT |
| Brsp | CTCGATGT | TGGATCAGGGC | GTCTAATGG  | -TGCAGCC | -GCTA | -TTAAGGG | TCGTT | TGTT |
| Gamo | CTCGATGT | TGGATCAGGAC | ATCTAATGG  | -TGCAGCC | -GCTA | -TTAAGGG | TCGTT | TGTT |
| Lolo | CTCGATGT | TGGATCAGGAC | ATCTAATGG  | -TGCAGCC | -GCTA | -TTAAGGG | TCGTT | TGTT |
| Batr | CTCGATGT | TGGATCAAGAC | ACCCCAGTGG | -TGCAGCC | -GCTA | -CTAATGG | TCGTT | TGTT |
| Prmy | CTCGATGT | TGGATCAGGAC | ATCCCAATGG | -TGCAGCC | -GCTA | -TTAATGG | TCGTT | TGTT |
| Loli | CTCGATGT | TGGATCAGGAC | ATCTAATGG  | -TGCAGCC | -GCTA | -TTAAGGG | TCGTT | TGTT |
| Loam | CTCGATGT | TGGATCAGGAC | ATCTAATGG  | -TGCAGCC | -GCTA | -TTAAGGG | TCGTT | TGTT |
| Chab | CTCGATGT | TGGATCAGGAC | ATCTAATGG  | -TGCAGCC | -GCTA | -TTAAGGG | TCGTT | TGTT |
| Chto | CTCGATGT | TGGATCAGGAC | ATCTAATGG  | -TGCAGCC | -GCTA | -TTAAGGG | TCGTT | TGTT |
| Majo | CTCGATGT | TGGATCAGGAC | ATCTAATGG  | -TGCAGCC | -GCTA | -TTAAGGG | TCGTT | TGTT |
| Hlst | CTCGATGT | TGGATCAGGAC | ATCTAATGG  | -TGCAGCC | -GCTA | -TTAAGGG | TCGTT | TGTT |
| Clpe | CTCGATGT | TGGATCAGGAC | ATCTAATGG  | -TGCAGCC | -GCTA | -TTAAGGG | TCGTT | TGTT |
| Mlmr | CTCGATGT | TGGATCAGGAC | ATCTAATGG  | -TGCAGCC | -GCTA | -TTAAGGG | TCGTT | TGTT |
| Crcr | CTCGATGT | TGGATCAAGAC | ATCTAATGG  | -TGCAGCC | -GCTA | -TTAAGGG | TCGTT | TGTT |
| Muce | CTCGATGT | TGGATCAAGAC | ATCTAATGG  | -TGCAGCC | -GCTA | -TTAAGGG | TCGTT | TGTT |
| Bege | CTCGATGT | TGGATCAGGAC | ATCTAATGG  | -TGCAGCC | -GCTA | -TTAAGGG | TCGTT | TGTT |
| Mela | CTCGATGT | TGGATCAGGAC | ATCTAATGG  | -TGCAGCC | -GCTA | -TTAAGGG | TCGTT | TGTT |
| Hats | CTCGATGT | TGGATCAGGAC | ATCTAATGG  | -TGCAGCC | -GCTA | -TTAAGGG | TCGTT | TGTT |
| Orla | CTCGATGT | TGGATCAGGAC | ATCTAATGG  | -TGCAGCC | -GCTA | -TTAAGGG | TCGTT | TGTT |

Cosa CTCGATGT TGGATCAGGAC AT CCTAATGG - TGCAGCC - GCTA - TTAAGGG TCGTT TGTT  
 Exsp CTCGATGT TGGATCAGGAC AT CCTAATGG - TGCAGCC - GCTA - TTAAGGG TCGTT TGTT  
 Depa CTCGATGT TGGATCAGGAC AT CCTAATGG - CCAGCC - GTTA - TTAAGGG TCGTT TGTT  
 Rima CTCGATGT TGGATCAGGGC AT CCTAATGG - CCAACC - ACTA - TTAAGGG TCGTT TGTT  
 Fuol CTCGATGT TGGATCAGGAC AT CCTAATGG - TGCAGCC - GCTC - TTTAGGG TCGTT TGTT  
 Gmaf CTCGATGT TGGATCAGGAC AT CCTAATGG - TGCAGCC - GCTA - TTAAGGG TCGTT TGTT  
 Xeei CTCGATGT TGGATCAGGAC AT CCTAATGG - TGCAGCC - GCTA - ATAAGGG TCGTT TGTT  
 Pros CTCGATGT TGGATCAGGAT AT CCTACTGG - TGCAGCC - GCTA - TTAAGGG TCGTT TGTT  
 Scmi CTCGATGT TGGATCAGGAT AT CCTACTGG - TGTAGCC - GCTA - TTAAGGG TCGTT TGTT  
 Rolo CTCGATGT TGGATCAGGAC AT CCTAATGG - TGCAGCC - GCTA - TTAAGGG TCGTT TGTT  
 Cere CTCGATGT TGGATCAGGAC AT CCTAATGG - TGCAGCC - GCTA - TTAAGGG TCGTT TGTT  
 Daga CTCGATGT TGGATCAGGAC AT CCTAATGG - TGCAGCC - GCTA - TTAAGGG TCGTT TGTT  
 Anco CTCGATGT TGGATCAGGAC AT CCTAATGG - TGCAGCC - GCTA - TTAAGGG TCGTT TGTT  
 Dmve CTCGATGT TGGATCAGGAC AT CCTAACGG - TGCAGCC - GCTC - TTAAGGG TCGTT TGTT  
 Dmar CTCGATGT TGGATCAGGAC AT CCTAACGG - TCAACC - GCTC - TTAAGGG TCGTT TGTT  
 Anka CTCGATGT TGGATCAGGAC AT CCTAATGG - TGCAGCC - GCTA - TTAAGGG TCGTT TGTT  
 Moja CTCGATGT TGGATCAGGAC AT CCTAATGG - TGCAGCC - GCTA - TTAAGGG TCGTT TGTT  
 Hoja CTCGATGT TGGATCAGGAC AT CCTAATGG - TGCAGCC - GCTA - TTAAGGG TCGTT TGTT  
 Bede CTCGATGT TGGATCAGGAC AT CCTAATGG - TGCAGCC - GCTA - TTAAGGG TCGTT TGTT  
 Bsp CTCGATGT TGGATCAGGAC AT CCTAATGG - TGCAGCC - GCTA - TTAAGGG TCGTT TGTT  
 Mysp CTCGATGT TGGATCAGGAC AT CCTAACGG - TGCAGCC - GCTC - TTAAGGG TCGTT TGTT  
 Osja CTCGATGT TGGATCAGGAC AT CCTAACGG - TGCAGCC - GCTC - TTAAGGG TCGTT TGTT  
 Sgro CTCGATGT TGGATCAGGAC AT CCTAATGG - TCAACC - GCTA - TTAAGGG TCGTT TGTT  
 Pzpa CTCGATGT TGGATCAGGAC AT CCTAATGG - TGCAGCC - GCTA - TTAAGGG TCGTT TGTT  
 Zeja CTCGATGT TGGATCAGGAC AT CCTAATGG - TGCAGCC - GCTA - TTAAGGG TCGTT TGTT  
 Znne CTCGATGT TGGATCAGGAC AT CCTAATGG - TGCAGCC - GCTA - TTAAGGG TCGTT TGTT  
 Zefa CTCGATGT TGGATCAGGAC AT CCTAATGG - TGCAGCC - GCTA - TTAAGGG TCGTT TGTT  
 Acni CTCGATGT TGGATCAGGAC AT CCTAATGG - TGCAGCC - GCTA - TTAAGGG TCGTT TGTT  
 Ncrh CTCGATGT TGGATCAGGAC AT CCTAATGG - TGCAGCC - GCTA - TTAAGGG TCGTT TGTT  
 Agca CTCGATGT TGGATCAGGAC AT CCTAATGG - TGCAGCC - GCTA - TTAAGGG TCGTT TGTT  
 Hydy CTCGATGT TGGATCAGGAC AT CCTAATGG - TGCAGCC - GCTA - TTAAGGG TCGTT TGTT  
 Gsac CTCGATGT TGGATCAGGAC AT CCTAATGG - TGCAGCC - GCTA - TTAAGGG TCGTT TGTT  
 Pevo CTCGATGT TGGATCAGGGT AT CCTAATGG - TGCAGCC - GCTA - TTAAGGG TCGTT TGTT  
 Hiku CTCGATGT TGGATCAGGAC AT CCTAATGG - TGTAGCC - GCTA - TTAAGGG TCGTT TGTT  
 Inpa CTCGATGT TGGATCAGGAC AT CCTAATGG - TGCAGCC - GCTA - TTAAGGG TCGTT TGTT  
 Auch CTCGATGT TGGATCAGGAC AT CCTAATGG - CCAGCC - GTTA - TTAAGGG TCGTT TGTT  
 Fico CTCGATGT TGGATCAGGAC AT CCTAATGG - TGCAGCC - GCTA - TTAAGGG TCGTT TGTT  
 Macs CTCGATGT TGGATCAGGAC AT CCTAATGG - TGCAGCC - GCTA - TTAAGGG TCGTT TGTT  
 Moal CTCGATGT TGGATCAGGAC AC CCCAATGG - TGCAGCC - GCTA - TTAAGGG TCGTT TGTT  
 Syma CTCGATGT TGGATCAGGAC AC CCCAATGG - TGCATCC - GTTA - TTAAGGG TCGTT TGTT  
 Maf r CTCGATGT TGGATCAGGAC AT CCTACTGG - TGCAGCC - GCTA - TTAAGGG TCGTT TGTT  
 Dcpe CTCGATGT TGGATCAGGAC AT CCTATTGG - CCAGCC - GTCA - TTAAGGG TCGTT TGTT  
 Dct i CTCGATGT TGGATCAGGAC AT CCTATTGG - CCAGCC - GTCA - TTAAGGG TCGTT TGTT  
 Hehi CTCGATGT TGGATCAGGAC AT CCTAATGG - TGCAGCC - GCTA - TTAAGGG TCGTT TGTT  
 Stam CTCGATGT TGGATCAGGAC AT CCTAATGG - TGCAGCC - GCTA - TTAAGGG TCGTT TGTT  
 Hogi CTCGATGT TGGATCAGGAC AT CCTAATGG - TGCAGCC - GCTA - TTAAGGG TCGTT TGTT  
 Erzo CTCGATGT TGGATCAGGAC AT CCTAATGG - TGCAGCC - GCTA - TTAAGGG TCGTT TGTT  
 Hxot CTCGATGT TGGATCAGGAC AT CCTAATGG - TGCAGCC - GCTA - TTAAGGG TCGTT TGTT  
 Core CTCGATGT TGGATCAGGAC AT CCTAATGG - TGCAGCC - GCTA - TTAAGGG TCGTT TGTT  
 Apve CTCGATGT TGGATCAGGAC AT CCTAATGG - TGCAGCC - GCTA - TTAAGGG TCGTT TGTT  
 Lat j CTCGATGT TGGATCAGGAC AT CCTAATGG - TGCAGCC - GCTA - TTAAGGG TCGTT TGTT  
 Laja CTCGATGT TGGATCAGGAC AT CCTAATGG - TGCAGCC - GCTA - TTAAGGG TCGTT TGTT

Syja CTCGATGT TGGATCAGGAC AT CCTAATGG - TGCAGCC - GCTA - TTAAGGG TCGTT TGTT  
 Epme CTCGATGT TGGATCAGGAC AT CCTAATGG - TGCAGCC - GCTA - TTAAGGG TCGTT TGTT  
 Grse CTCGATGT TGGATCAGGAC AT CCTAATGG - TGCAGCC - GCTA - TTAAGGG TCGTT TGTT  
 Clja CTCGATGT TGGATCAGGAC AT CCTAATGG - TGCAGCC - GCTA - TTAAGGG TCGTT TGTT  
 Ogcy CTCGATGT TGGATCAGGAC AT CCTAATGG - TGCAGCC - GCTA - TTAAGGG TCGTT TGTT  
 Plna CTCGATGT TGGATCAGGAC AT CCTAATGG - CCAGCC - GTTA - TTAAGGG TCGTT TGTT  
 Lema CTCGATGT TGGATCAGGAC AT CCTAATGG - TGCAGCC - GCTA - TTAAGGG TCGTT TGTT  
 Etzo CTCGATGT TGGATCAGGAC AT CCTAATGG - TGCAGCC - GCTA - TTAAGGG TCGTT TGTT  
 Apse CTCGATGT TGGATCAGGAC AT CCTATTGG - CCAGCC - GCTA - TTAAGGG TCGTT TGTT  
 Epde CTCGATGT TGGATCAGGAC AT CCTAATGG - TGCAGCC - GCTA - TTAAGGG TCGTT TGTT  
 Slja CTCGATGT TGGATCAGGAC AT CCTAATGG - TCAACC - ACTA - TTAAGGG TCGTT TGTT  
 Bsja CTCGATGT TGGATCAGGAC AT CCTAATGG - TGCAGCC - GCTA - TTAAGGG TCGTT TGTT  
 Ecna CTCGATGT TGGATCAGGAC AT CCTAATGG - TCAACC - GCTA - TTAAGGG TCGTT TGTT  
 Cohi CTCGATGT TGGATCAGGAC AT CCTATTGG - TGCAGCC - GCTA - TTAAGGG TCGTT TGTT  
 Caar CTCGATGT TGGATCAGGAC AT CCTAATGG - TGCAGCC - GCTA - TTAAGGG TCGTT TGTT  
 Came CTCGATGT TGGATCAGGAC AT CCTAATGG - TGCAGCC - GCTA - TTAAGGG TCGTT TGTT  
 Mema CTCGATGT TGGATCAGGAC AT CCTAATGG - CCAGCC - ACTA - TTAAGGG TCGTT TGTT  
 Lenu CTCGATGT TGGATCAGGGC AT CCTAATGG - TGCAGCC - GCTA - TTAAGGG TCGTT TGTT  
 Brja CTCGATGT TGGATCAGGAC AT CCTAATGG - TCAACC - GCTA - TTCAGGG TCGTT TGTT  
 Plma CTCGATGT TGGATCAGGAC AT CCTAATGG - TGCAGCC - GCTA - TTAAGGG TCGTT TGTT  
 Emst CTCGATGT TGGATCAGGAC AT CCTAATGG - TGCAGCC - GCTA - TTAAGGG TCGTT TGTT  
 Ptti CTCGATGT TGGATCAGGAC AT CCTAATGG - TGCAGCC - GCTA - TTAAGGG TCGTT TGTT  
 Losu CTCGATGT TGGATCAGGAC AT CCTAATGG - TGCAGCC - GCTA - TTAAGGG TCGTT TGTT  
 Geoy CTCGATGT TGGATCAGGAC AT CCTAATGG - TGCAGCC - GCTA - TTAAGGG TCGTT TGTT  
 Dipi CTCGATGT TGGATCAGGAC AT CCTAATGG - TGCAGCC - GCTA - TTAAGGG TCGTT TGTT  
 Pama CTCGATGT TGGATCAGGAC AT CCTAATGG - TGCAGCC - GCTA - TTAAGGG TCGTT TGTT  
 Leob CTCGATGT TGGATCAGGAC AT CCTAATGG - TGCAGCC - GCTA - TTAAGGG TCGTT TGTT  
 Neba CTCGATGT TGGATCAGGAC AT CCCATTGG - CGTAGA - GCTA - TTAAGGG TCGTT TGTT  
 Pdpi CTCGATGT TGGATCAGGAC AT CCTAATGG - TGCAGCC - GCTA - TTAAGGG TCGTT TGTT  
 Nimi CTCGATGT TGGATCAGGAC AT CCTAATGG - TCAACC - GCTA - TTAAGGG TCGTT TGTT  
 Uptr CTCGATGT TGGATCAGGAC AT CCTGATGG - TGCAGCC - GCTA - TTAAGGG TCGTT TGTT  
 Pesc CTCGATGT TGGATCAGGAC AT CCTAATGG - CCAGCC - GCTA - TTAAGGG TCGTT TGTT  
 Baar CTCGATGT TGGATCAGGAC AT CCTAATGG - TGCAGCC - GCTA TTAAGGG TCGTT TGTT  
 Moar CTCGATGT TGGATCAGGAC AT CCTAATGG - TGCAGCC - GCTA - TTAAGGG TCGTT TGTT  
 Toja CTCGATGT TGGATCAGGAC AT CCTAATGG - TGCAGCC - GCTA - TTAAGGG TCGTT TGTT  
 Chau CTCGATGT TGGATCAGGAC AT CCTAATGG - TGCAGCC - GCTA - TTAAGGG TCGTT TGTT  
 Chse CTCGATGT TGGATCAGGAC AT CCTAATGG - TGCAGCC - GCTA - TTAAGGG TCGTT TGTT  
 Enar CTCGATGT TGGATCAGGAC AT CCTAATGG - TGCAGCC - GCTA - TTAAGGG TCGTT TGTT  
 Hpty CTCGATGT TGGATCAGGAC AT CCTAATGG - TGCAGCC - GCTA - TTCAGGG TCGTT TGTT  
 Nana CTCGATGT TGGATCAGGAC AT CCTAATGG - TGCAGCC - GCTA - TTAAGGG TCGTT TGTT  
 Mcst CTCGATGT TGGATCAGGAC AT CCTAATGG - ACAGCC - ATTA - TTAAGGG TCGTT TGTT  
 Rhox CTCGATGT TGGATCAGGAC AT CCTAATGG - TGCAGCC - GCTA - TTAAGGG TCGTT TGTT  
 Opfa CTCGATGT TGGATCAGGAC AT CCTAATGG - TGCAGCC - GCTA - TTAAGGG TCGTT TGTT  
 Paar CTCGATGT TGGATCAGGAC AT CCTAATGG - TGCAGCC - GCTA - TTAAGGG TCGTT TGTT  
 Gozo CTCGATGT TGGATCAGGAC AT CCTAATGG - TGCAGCC - GCTA - TTAAGGG TCGTT TGTT  
 Ackr CTCGATGT TGGATCAGGAC AT CCTAATGG - TGCAGCC - GCTA - TTAAGGG TCGTT TGTT  
 Elev CTCGATGT TGGATCAGGAC AT CCTAATGG - TCAACC - GCTA - TTAAGGG TCGTT TGTT  
 Trdu CTCGATGT TGGATCAGGAC AT CCTAATGG - TGCAGCC - GCTA - TTAAGGG TCGTT TGTT  
 Amoc CTCGATGT TGGATCAGGAC AT CCTAATGG - TCAACC - GCTA - TTAAGGG TCGTT TGTT  
 Hame CTCGATGT TGGATCAGGAC AT CCTAATGG - TGCAGCC - GCTA - TTAAGGG TCGTT TGTT  
 Chso CTCGATGT TGGATCAGGAC AT CCTAATGG - TGCAGCC - GCTA - TTAAGGG TCGTT TGTT  
 Lyto CTCGATGT TGGATCAGGAC AT CCTAATGG - TGCAGCC - GCTA - TTAAGGG TCGTT TGTT

|      |          |             |            |          |       |          |       |      |
|------|----------|-------------|------------|----------|-------|----------|-------|------|
| Encr | CTCGATGT | TGGATCAGGAC | ATCCTAATGC | -TGCAGCC | -GCTA | -TTAAGGG | TCGTT | TGTT |
| Bvar | CTCGATGT | TGGATCAGGAC | ATCCCAGTAG | -TGCAGCC | -GCTA | -TTAAGGG | TCGTT | TGTT |
| Noco | CTCGATGT | TGGATCAGGAC | ATCCTATTGC | -TGCAGCC | -GCTA | -TTAAGGG | TCGTT | TGTT |
| Chsp | CTCGATGT | TGGATCAGGAC | ATCCTAATGC | -TGCAGCC | -GCTA | -TTAAGGG | TCGTT | TGTT |
| Arja | CTCGATGT | TGGATCAGGAC | ATCCTAATGC | -TGCAGCC | -GCTA | -TTAAGGG | TCGTT | TGTT |
| Pase | CTCGATGT | TGGATCAGGAC | ATCCTAATGC | -TGCAGCC | -GCTA | -TTAAGGG | TCGTT | TGTT |
| Trel | CTCGATGT | TGGATCAGGAC | ATCCTACTGC | -TGCAGCC | -GCTA | -TTAAGGG | TCGTT | TGTT |
| Lifa | CTCGATGT | TGGATCAGGAC | ATCCTAATGC | -TGCAGCC | -ACTA | -TTAAGGG | TCGTT | TGTT |
| Acur | CTCGATGT | TGGATCAGGAC | ATCCTAATGC | -TGCAGCC | -GCTA | -TTAAGGG | TCGTT | TGTT |
| Ampe | CTCGATGT | TGGATCAGGAC | ATCCTAATGC | -TGCAGCC | -GCTA | -TTAAGGG | TCGTT | TGTT |
| Urja | CTCGATGT | TGGATCAGGAC | ATCCTAATGC | -TGTAGCC | -GCTA | -TTAAGGG | TCGTT | TGTT |
| Enet | CTCGATGT | TGGATCAGGAC | ATCCTAATGC | -TGCAGCC | -GCTA | -TTAAGGG | TCGTT | TGTT |
| Ptbr | CTCGATGT | TGGATCAGGAC | ATCCTAATGC | -TGCAGCC | -GCTA | -TTAAGGG | TCGTT | TGTT |
| Safa | CTCGATGT | TGGATCAGGAC | ATCCTAATGC | -TGCAGCC | -GCTA | -TTAAGGG | TCGTT | TGTT |
| Icae | CTCGATGT | TGGATCAGGAC | ATCCTAATGC | -TGCAGCC | -GCTA | -TTAAGGG | TCGTT | TGTT |
| Asmi | CTCGATGT | TGGATCAGGAC | ATCCTAATGC | -TGCAGCC | -GCTA | -TTAAGGG | TCGTT | TGTT |
| Foal | CTCGATGT | TGGATCAGGAC | ATCCTAATGC | -TGCAGCC | -GCTC | -TTAAGGG | TCGTT | TGTT |
| Drze | CTCGATGT | TGGATCAGGAC | ATCCTAATGC | -TGCAGCC | -GCTA | -TTAAGGG | TCGTT | TGTT |
| Rhas | CTCGATGT | TGGATCAGGAC | ATCCTAATGC | -TGCAGCC | -GCTA | -TTAAGGG | TCGTT | TGTT |
| Elac | CTCGATGT | TGGATCAGGAC | ATCCTAATGC | -TGCAGCC | -GCTA | -TTAAGGG | TCGTT | TGTT |
| Kugu | CTCGATGT | TGGATCAGGAC | ATCCTAATGC | -TGCAGCC | -GCTA | -TTAAGGG | TCGTT | TGTT |
| Plor | CTCGATGT | TGGATCAGGAC | ATCCTAATGC | -TGCAGCC | -GCTA | -TTAAGGG | TCGTT | TGTT |
| Sgun | CTCGATGT | TGGATCAGGAC | ATCCTAATGC | -TGCAGCC | -GCTA | -TTAAGGG | TCGTT | TGTT |
| Zaco | CTCGATGT | TGGATCAGGAC | ATCCTAATGA | -TGCAGCC | -GTTA | -TTAAGGG | TCGTT | TGTT |
| Zbfl | CTCGATGT | TGGATCAGGAC | ATCCTAATGC | -TGCAGCC | -GCTA | -TTAAGGG | TCGTT | TGTT |
| Spba | CTCGATGT | TGGATCAGGAC | ATCCTAATGC | -TGCAGCC | -GCTA | -TTAAGGG | TCGTT | TGTT |
| Game | CTCGATGT | TGGATCAGGAC | ATCCTAATGC | -TGCAGCC | -GCTA | -TTAAGGG | TCGTT | TGTT |
| Thth | CTCGATGT | TGGATCAGGAC | ATCCTAATGC | -TGCAGCC | -GCTC | -TTAAGGG | TCGTT | TGTT |
| Xigl | CTCGATGT | TGGATCAGGAC | ATCCTAATGC | -TGCAGCC | -GCTA | -TTAAGGG | TCGTT | TGTT |
| Hyja | CTCGATGT | TGGATCAGGAC | ATCCTAATGC | -TGCAGCC | -GCTA | -TTAAGGG | TCGTT | TGTT |
| Psan | CTCGATGT | TGGATCAGGAC | ATCCTAATGC | -TGCAGCC | -GCTA | -TTAAGGG | TCGTT | TGTT |
| Cupa | CTCGATGT | TGGATCAGGAC | ATCCTAATGC | -TGCAGCC | -GCTA | -TTAAGGG | TCGTT | TGTT |
| Mpch | CTCGATGT | TGGATCAGGAC | ATCCTAATGC | -TGCAGCC | -GCTA | -TTAAGGG | TCGTT | TGTT |
| Char | CTCGATGT | TGGATCAGGAC | ATCCTAATGC | -TGCAGCC | -GCTA | -TTAAGGG | TCGTT | TGTT |
| Pser | CTCGATGT | TGGATCAGGAC | ATCCTAATGC | -CCAGCC  | -GCTA | -TTAAGGG | TCGTT | TGTT |
| Prol | CTCGATGT | TGGATCAGGAC | ATCCTAATGC | -TGCAGCC | -GCTA | -TTAAGGG | TCGTT | TGTT |
| Plbi | CTCGATGT | TGGATCAGGAC | ATCCTAATGC | -TGCAGCC | -GCTA | -TTAAGGG | TCGTT | TGTT |
| Calu | CTCGATGT | TGGATCAGGAC | ATCCTAATGC | -TGCAGCC | -GCTA | -TTAAGGG | TCGTT | TGTT |
| Papa | CTCGATGT | TGGATCAGGAC | ATCCCAATGC | -TGCAGCC | -GCTA | -TTAAGGG | TCGTT | TGTT |
| Sufr | CTCGATGT | TGGATCAGGAT | ATCCCAATGC | -TGCAGCC | -GCTA | -TTAAGGG | TCGTT | TGTT |
| Stci | CTCGATGT | TGGATCAGGAT | ATCCTAATGC | -TGCAGCC | -GCTA | -TTAAGGG | TCGTT | TGTT |
| Taru | CTCGATGT | TGGATCAGGAC | ATCCTAATGC | -TGCAGCC | -GCTA | -TTAAGGG | TCGTT | TGTT |
| Rala | CTCGATGT | TGGATCAGGAC | ATCCTAATGC | -TGCAGCC | -GCTA | -TTAAGGG | TCGTT | TGTT |

\*\*\*\*\* \* \* \* \* \* \*\*



|      | 53'    | 51'    | C'    | 54   | 54'   |       |           |      |          |       |
|------|--------|--------|-------|------|-------|-------|-----------|------|----------|-------|
| Scca | CAACGA | TTAATA | GTCCT | ACGT | GATCT | GAGTT | CAGACCGGA | GAAA | TCCAGGTC | A-GTT |
| Muma | CAACGA | TTAATA | GTCCT | ACGT | GATCT | GAGTT | CAGACCGGA | GAAA | TCCAGGTC | A-GTT |
| Erca | CAACGA | TTAA-A | GTCCT | ACGT | GATCT | GAGTT | CAGACCGGA | GTA  | TCCAGGTC | A-GTT |
| Pose | CAACGA | TTAA-A | GTCCT | ACGT | GATCT | GAGTT | CAGACCGGA | GTA  | TCCAGGTC | A-GTT |
| Actr | CAACGA | TTAA-A | GTCCT | ACGT | GATCT | GAGTT | CAGACCGGA | GTA  | TCCAGGTC | A-GTT |
| Scal | CAACGA | TTAA-A | GTCCT | ACGT | GATCT | GAGTT | CAGACCGGA | GTA  | TCCAGGTC | A-GTT |
| Posp | CAACGA | TTAA-A | GTCCT | ACGT | GATCT | GAGTT | CAGACCGGA | GTA  | TCCAGGTC | A-GTT |
| Atsp | CAACGA | TTAA-A | GTCCT | ACGT | GATCT | GAGTT | CAGACCGGA | GTA  | TCCAGGTC | A-GTT |
| Leoc | CAACGA | TTAA-A | GTCCT | ACGT | GATCT | GAGTT | CAGACCGGA | GTA  | TCCAGGTC | A-GTT |
| Amca | CAACGA | TTAA-A | GTCCT | ACGT | GATCT | GAGTT | CAGACCGGA | GTA  | TCCAGGTC | A-GTT |
| Osbi | CAACGA | TTAA-A | GTCCT | ACGT | GATCT | GAGTT | CAGACCGGA | GCAA | TCCAGGTC | G-GTT |
| Pabu | CAACGA | TTAA-A | GTCCT | ACGT | GATCT | GAGTT | CAGACCGGA | GAAA | TCCAGGTC | A-GTT |
| Hial | CAACGA | TTAA-A | GTCCT | ACGT | GATCT | GAGTT | CAGACCGGA | GTA  | TCCAGGTC | A-GTT |
| Elha | CAACGA | TTAA-A | GTCCT | ACGT | GATCT | GAGTT | CAGACCGGA | GCAA | TCCAGGTC | G-GTT |
| Mlcy | CAACGA | TTAA-A | GTCCT | ACGT | GATCT | GAGTT | CAGACCGGA | GCAA | TCCAGGTC | A-GTT |
| Algl | CAACGA | TTAA-A | GTCCT | ACGT | GATCT | GAGTT | CAGACCGGA | GTA  | TCCAGGTC | G-GTT |
| Ptgi | CAACGA | TTAA-A | GTCCT | ACGT | GATCT | GAGTT | CAGACCGGA | GAAA | TCCAGGTC | G-GTT |
| Alaf | CAACGA | TTAA-A | GTCCT | ACGT | GATCT | GAGTT | CAGACCGGA | GAAA | TCCAGGTC | G-GTT |
| Nock | CAACGA | TTAA-A | GTCCT | ACGT | GATCT | GAGTT | CAGACCGGA | GAAA | TCCAGGTC | G-GTT |
| Anja | CAACGA | TTAATA | GTCCT | ACGT | GATCT | GAGTT | CAGACCGGA | GTA  | TCCAGGTC | G-GTT |
| Gyki | CAACGA | TTAATA | GTCCT | ACGT | GATCT | GAGTT | CAGACCGGA | GTA  | TCCAGGTC | G-GTT |
| Syka | CAACGA | TTAATA | GTCCT | ACGT | GATCT | GAGTT | CAGACCGGA | GTA  | TCCAGGTC | G-GTT |
| Opma | CAACGA | TTAACA | GTCCT | ACGT | GATCT | GAGTT | CAGACCGGA | GCAA | TCCAGGTC | G-GTT |
| Comy | CAACGA | TTAATA | GCCCT | ACGT | GATCT | GAGTT | CAGACCGGA | GTA  | TCCAGGTC | G-GTT |
| Sasp | CAACGA | TTAATA | GTCCT | ACGT | GATCT | GAGTT | CAGACCGGA | GTA  | TCCAGGTC | G-GTT |
| Eupe | CAACGA | TTAATA | GTCCT | ACGT | GATCT | GAGTT | CAGACCGGA | GTA  | TCCAGGTC | G-GTT |
| Enja | CAACGA | TTAA-A | GTCCT | ACGT | GATCT | GAGTT | CAGACCGGA | GTA  | TCCAGGTC | G-GTT |
| Same | CAACGA | TTAA-A | GTCCT | ACGT | GATCT | GAGTT | CAGACCGGA | GTA  | TCCAGGTC | A-GTT |
| Chch | CAACGA | TTAA-A | GTCCT | ACGT | GATCT | GAGTT | CAGACCGGA | GTA  | TCCAGGTC | A-GTT |
| Grgr | CAACGA | TTAA-A | GTCCT | ACGT | GATCT | GAGTT | CAGACCGGA | GAAA | TCCAGGTC | A-GTT |
| Caau | CAACGA | TTAA-A | GTCCT | ACGT | GATCT | GAGTT | CAGACCGGA | GCAA | TCCAGGTC | A-GTT |
| Cyca | CAACGA | TTAA-A | GTCCT | ACGT | GATCT | GAGTT | CAGACCGGA | GCAA | TCCAGGTC | A-GTT |
| Dare | CAACGA | TTAATA | GTCCT | ACGT | GATCT | GAGTT | CAGACCGGA | GTA  | TCCAGGTC | A-GTT |
| Cost | CAACGA | TTAA-A | GTCCT | ACGT | GATCT | GAGTT | CAGACCGGA | GTA  | TCCAGGTC | A-GTT |
| Leec | CAACGA | TTAA-A | GTCCT | ACGT | GATCT | GAGTT | CAGACCGGA | GCAA | TCCAGGTC | A-GTT |
| CrIa | CAACGA | TTAA-A | GTCCT | ACGT | GATCT | GAGTT | CAGTCTGGT | GTA  | TCCAGGTC | A-GTT |
| Clmc | CAACGA | TTAA-A | GTCCT | ACGT | GATCT | GAGTT | CAGACCGGA | GCAA | TCCAGGTC | A-GTT |
| Phin | CAACGA | TTAA-A | GTCCT | ACGT | GATCT | GAGTT | CAGACCGGA | GCAA | TCCAGGTC | A-GTT |
| Icpu | CAACGA | TTAA-A | GTCCT | ACGT | GATCT | GAGTT | CAGACCGGA | GCAA | TCCAGGTC | A-GTT |
| Psto | CAACGA | TTAA-A | GTCCT | ACGT | GATCT | GAGTT | CAGACCGGA | GCAA | TCCAGGTC | A-GTT |
| Cora | CAACGA | TTAA-A | GTCCT | ACGT | GATCT | GAGTT | CAGACCGGA | GCAA | TCCAGGTC | A-GTT |
| Eisp | CAACGA | TTAA-A | GTCCT | ACGT | GATCT | GAGTT | CAGACCGGA | GAAA | TCCAGGTC | A-GTT |
| Apal | CAACGA | TTAA-A | GTCCT | ACGT | GATCT | GAGTT | CAGACCGGA | GAAA | TCCAGGTC | G-GTT |
| EsLu | CAACGA | TTAA-A | GTCCT | ACGT | GATCT | GAGTT | CAGACCGGA | GTA  | TCCAGGTC | A-GTT |
| Dape | CAACGA | TTAA-A | GTCCT | ACGT | GATCT | GAGTT | CAGACCGGA | GTA  | TCCAGGTC | A-GTT |
| Glse | CAACGA | TTAA-A | GTCCT | ACGT | GATCT | GAGTT | CAGACCGGA | GTA  | TCCAGGTC | A-GTT |
| Naar | CAACGA | TTAA-A | GTCCT | ACGT | GATCT | GAGTT | CAGACCGGA | GTA  | TCCAGGTC | A-GTT |
| Baoc | CAACGA | TTAA-A | GTCCT | ACGT | GATCT | GAGTT | CAGACCGGA | GTA  | TCCAGGTC | A-GTT |
| Opso | CAACGA | TTAA-A | GTCCT | ACGT | GATCT | GAGTT | CAGACCGGA | GTA  | TCCAGGTC | A-GTT |
| Alte | CAACGA | TTAA-A | GTCCT | ACGT | GATCT | GAGTT | CAGACCGGA | GCAA | TCCAGGTC | A-GTT |
| Plap | CAACGA | TTAA-A | GTCCT | ACGT | GATCT | GAGTT | CAGACCGGA | GCAA | TCCAGGTC | A-GTT |

Plal CAACGA TTAA-A GTCCT ACCTGATCT GA GTT CAGACCGGA GCAA TCCAGGTC A-GTT  
 Sami CAACGA TTAA-A GTCCT ACCTGATCT GA GTT CAGACCGGA GCAA TCCAGGTC A-GTT  
 Rere CAACGA TTAA-A GTCCT ACCTGATCT GA GTT CAGACCGGA GCAA TCCAGGTC A-GTT  
 Gama CAACGA TTAA-A GTCCT ACCTGATCT GA GTT CAGACCGGA GTAA TCCAGGTC A-GTT  
 Onmy CAACGA TTAA-A GTCCT ACCTGATCT GA GTT CAGACCGGA GTAA TCCAGGTC A-GTT  
 Sasa CAACGA TTAA-A GTCCT ACCTGATCT GA GTT CAGACCGGA GTAA TCCAGGTC A-GTT  
 Cola CAACGA TTAA-A GTCCT ACCTGATCT GA GTT CAGACCGGA GTAA TCCAGGTC A-GTT  
 Dita CAACGA TTAA-A GTCCT ACCTGATCT GA GTT CAGACCGGA GCAA TCCAGGTC A-GTT  
 Gogr CAACGA TTAA-A GTCCT ACCTGATCT GA GTT CAGACCGGA GCAA TCCAGGTC A-GTT  
 Chsl CAACGA TTAA-A GCCCT ACCTGATCT GA GTT CAGGCCGGA GTAA TCCAGGCC A-GAT  
 Atja CAACGA TTAACA GTCCT ACCTGATCT GA GTT CAGACCGGA GCAA TCCAGGTC A-GTT  
 lido CAACGA TTAATA GTCCT ACCTGATCT GA GTT CAGACCGGA GTAA TCCAGGTC A-GTT  
 Auja CAACGA TTAA-A GTCCT ACCTGATCT GA GTT CAGACCGGA GCAA TCCAGGTC AAGTT  
 Chag CAACGA TTAATA GTCCT ACCTGATCT GA GTT CAGACCGGA GTAA TCCAGGTC A-GTT  
 Hami CAACGA TTAA-A GTCCT ACCTGATCT GA GTT CAGACCGGA GTAA TCCAGGTC A-GTT  
 Saun CAACGA TTAA-A GTCCT ACCTGATCT GA GTT CAGACCGGA GTAA TCCAGGTC A-GTT  
 Nema CAACGA TTAA-A GTCCT ACCTGATCT GA GTT CAGACCGGA GTAA TCCAGGTC A-GTT  
 Disp CAACGA TTAA-A GTCCT ACCTGATCT GA GTT CAGACCGGA GTAA TCCAGGTC A-GTT  
 Myaf CAACGA TTAA-A GTCCT ACCTGATCT GA GTT CAGACCGGA GTAA TCCAGGTC A-GAT  
 Lagu CAACGA TTAA-A ATCCT ACCTGATCT GA GTT CAGACCGGA GTAA TCCAGGTC A-GTT  
 Trtr CAACGA TTAA-A ATCCT ACCTGATCT GA GTT CAGACCGGA GAGA TCCAGGTC A-GTT  
 Zucr CAACGA TTAA-A ATCCT ACCTGATCT GA GTT CAGACCGGA GAGA TCCAGGTC A-GTT  
 Pxja CAACGA TTAA-A GTCCT ACCTGATCT GA GTT CAGACCGGA GTAA TCCAGGTC A-GTT  
 Pxlo CAACGA TTAA-A GTCCT ACCTGATCT GA GTT CAGACCGGA GTAA TCCAGGTC A-GTT  
 Pctr CAACGA TTAA-A GTCCT ACCTGATCT GA GTT CAGACCGGA GCAA TCCAGGTC A-GTT  
 Apsa CAACGA TTAA-A GTCCT ACCTGATCT GA GTT CAGACCGGA GTAA TCCAGGTC A-GTT  
 Cabe CAACGG TTAA-A GTCCT ACCTGATCT GA GTT CAGACCGGA GTAA TCCAGGTC G-GTT  
 Bzze CAACGA TTAA-A GTCCT ACCTGATCT GA GTT CAGACCGGA GTAA TCCAGGTC A-GTT  
 Siim CAACGA TTAA-A GTCCT ACCTGATCT GA GTT CAGACCGGA GTAA TCCAGGTC G-GTT  
 Ctru CAACGA TTAA-A GTCCT ACCTGATCT GA GTT CAGACCGGA GTAA TCCAGGTC A-GTT  
 Dpbr CAACGA TTAA-A GTCCT ACCTGATCT GA GTT CAGACCGGA GTAA TCCAGGTC A-GTT  
 Caki CAACGA TTAA-A GTCCT ACCTGATCT GA GTT CAGACCGGA GTAA TCCAGGTC A-GTT  
 Phja CAACGA TTAA-A GTCCT ACCTGATCT GA GTT CAGACCGGA GTAA TCCAGGTC A-GTT  
 Brsp CAACAA TTAA-A GCCCT ACCTGATCT GA GTT CAGACCGGA GAAA TCCAGGTC G-GTT  
 Gamo CAACGA TTAA-A GTCCT ACCTGATCT GA GTT CAGACCGGA GTAA TCCAGGTC A-GTT  
 Lolo CAACGA TTAA-A GTCCT ACCTGATCT GA GTT CAGACCGGA GTAA TCCAGGTC A-GTT  
 Batr CAACGA TTAATA GTCTT ACCTGATCT GA GTT CAGACCGGA GCAA TCCAGGTC A-GTC  
 Prmy CAACGA TTAA-A GTCCT ACCTGATCT GA GTT CAGACCGGA GCAA TTCAGGTC A-GTT  
 Loli CAACGA TTAA-A GTCCT ACCTGATCT GA GTT CAGACCGGA GTAA TCCAGGTC G-GTT  
 Loam CAACGA TTAA-A GTCCT ACCTGATCT GA GTT CAGACCGGA GTAA TCCAGGTC A-GTT  
 Chab CAACGA TTAA-A GTCCT ACCTGATCT GA GTT CAGACCGGA GCAA TCCAGGTC A-GTT  
 Chto CAACGA TTAA-A GTCCT ACCTGATCT GA GTT CAGACCGGA GCAA TCCAGGTC A-GTT  
 Majo CAACGA TTAA-A GTCCT ACCTGATCT GA GTT CAGACCGGA GTAA TCCAGGTC A-GTT  
 Hlst CAACGA TTAA-A GTCCT ACCTGATCT GA GTT CAGACCGGA GTAA TCCAGGTC A-GTT  
 Clpe CAACGA TTAA-A GTCCT ACCTGATCT GA GTT CAGACCGGA GTAA TCCAGGTC G-GTT  
 Mlmr CAACAA TTAATA GTCCT ACCTGATCT GA GTT CAGACCGGA GTAA TCCAGGTC A-GTT  
 Crcr CAACGA TTAA-A GTCTT ACCTGATCT GA GTT CAGACCGGA GTAA TCCAGGTC A-GTT  
 Muce CAACGA TTAA-A GTCTT ACCTGATCT GA GTT CAGACCGGA GTAA TCCAGGTC A-GTT  
 Bege CAACGA TTAACA GTCCT ACCTGATCT GA GTT CAGACCGGA GTAA TCCAGGTC A-GTT  
 Mela CAACGA TTAA-A GTCCT ACCTGATCT GA GTT CAGACCGGA GTAA TCCAGGTC A-GTT  
 Hats CAACGA TTAA-A GTCCT ACCTGATCT GA GTT CAGACCGGA GTAA TCCAGGTC G-GTT  
 Orla CAACAA TTAA-A GTCCT ACCTGATCT GA GTT CAGACCGGA GTAA TCCAGGTC A-GTT

Cosa CAACGA TTAA-A GTCCT ACCTGATCT GA GTT CAGACCGGA GTAA TCCAGGTC A-GTT  
 Exsp CAACGA TTAA-A GTCCT ACCTGATCT GA GTT CAGACCGGA GTAA TCCAGGTC A-GTT  
 Depa CAACGA TTAA-A GTCCT ACCTGATCT GA GTT CAGACCGGA GAAA TCCAGGTC A-GTT  
 Rima CAACGA TTAA-A GCCCT ACCTGATCT GA GTT CAGACCGGA GCAA TCCAGGTC A-GTT  
 Fuol CAACGA TTAA-A GTCCT ACCTGATCT GA GTT CAGACCGGA GTAA TCCAGGTC A-GTT  
 Gmaf CAACGA TTAA-A GTCCT ACCTGATCT GA GTT CAGACCGGA GTAA TCCAGGTC A-GTT  
 Xeei CAACGA TTAA-A GTCCT ACCTGATCT GA GTT CAGACCGGA GTAA TCCAGGTC A-GTT  
 Pros CAACGA TTAA-A ATCCT ACCTGATCT GA GTT CAGACCGGA GTAA TCCAGGTC A-GTT  
 Scmi CAACGA TTAA-A ATCCT ACCTGATCT GA GTT CAGACCGGA GTAA TCCAGGTC A-GTT  
 Rolo CAACGA TTAA-A GTCCT ACCTGATCT GA GTT CAGACCGGA GTAA TCCAGGTC A-GTT  
 Cere CAACGA TTAA-A GTCCT ACCTGATCT GA GTT CAGACCGGA GTAA TCCAGGTC A-GTT  
 Daga CAACGA TTAA-A GTCCT ACCTGATCT GA GTT CAGACCGGA GTAA TCCAGGTC A-GTT  
 Anco CAACGA TTAA-A GTCCT ACCTGATCT GA GTT CAGACCGGA GTAA TCCAGGTC A-GTT  
 Dmve CAACGA TTAA-A GTCCT ACCTGATCT GA GTT CAGACCGGA GTAA TCCAGGTC A-GTT  
 Dmar CAACGA TTAA-A GTCCT ACCTGATCT GA GTT CAGACCGGA GTAA TCCAGGTC A-GTT  
 Anka CAACGA TTAA-A GTCCT ACCTGATCT GA GTT CAGACCGGA GCAA TCCAGGTC A-GTT  
 Moja CAACGA TTAA-A GTCCT ACCTGATCT GA GTT CAGACCGGA GTAA TCCAGGTC A-GTT  
 Hoja CAACGA TTAA-A GTCCT ACCTGATCT GA GTT CAGACCGGA GTAA TCCAGGTC A-GTT  
 Bede CAACGA TTAA-A GTCCT ACCTGATCT GA GTT CAGACCGGA GTAA TCCAGGTC A-GTT  
 Bosp CAACGA TTAA-A GTCCT ACCTGATCT GA GTT CAGACCGGA GTAA TCCAGGTC A-GTT  
 Mysp CAACGA TTAA-A GTCCT ACCTGATCT GA GTT CAGACCGGA GTAA TCCAGGTC A-GTT  
 Osja CAACGA TTAA-A GTCCT ACCTGATCT GA GTT CAGACCGGA GTAA TCCAGGTC A-GTT  
 Sgro CAACGA TTAA-A GTCCT ACCTGATCT GA GTT CAGACCGGA GTAA TCCAGGTC A-GTT  
 Pzpa CAACGA TTAA-A GTCCT ACCTGATCT GA GTT CAGACCGGA GCAA TCCAGGTC A-GTT  
 Zeja CAACGA TTAA-A GTCCT ACCTGATCT GA GTT CAGACCGGA GTAA TCCAGGTC G-GTT  
 Znne CAACGA TTAA-A GTCCT ACCTGATCT GA GTT CAGACCGGA GTAA TCCAGGTC A-GTT  
 Zefa CAACGA TTAA-A GTCCT ACCTGATCT GA GTT CAGACCGGA GTAA TCCAGGTC A-GTT  
 Acni CAACGA TTAA-A GTCCT ACCTGATCT GA GTT CAGACCGGA GTAA TCCAGGTC A-GTT  
 Ncrh CAACGA TTAA-A GTCCT ACCTGATCT GA GTT CAGACCGGA GTAA TCCAGGTC A-GTT  
 Agca CAACGA TTAA-A GTCCT ACCTGATCT GA GTT CAGACCGGA GTAA TCCAGGTC A-GTT  
 Hydy CAACGA TTAA-A GTCCT ACCTGATCT GA GTT CAGACCGGA GTAA TCCAGGTC A-GTT  
 Gsac CAACGA TTAA-A GTCCT ACCTGATCT GA GTT CAGACCGGA GTAA TCCAGGTC A-GTT  
 Pevo CAACGA TTAA-A ACCCT ACCTGATCT GA GTT CAGACCGGA GTAA TCCAGGTC A-GTT  
 Hiku CAACGA TTAA-A GTCCT ACCTGATCT GA GTT CAGACCGGA GTAA TCCAGGTC A-GTT  
 Inpa CAACGA TTAA-A GTCCT ACCTGATCT GA GTT CAGACCGGA GCAA TCCAGGTC A-GTT  
 Auch CAACGA TTAA-A GTCCT ACCTGATCT GA GTT CAGACCGGA GTAA TCCAGGTC G-GTT  
 Fico CAACGA TTAA-A GTCCT ACCTGATCT GA GTT CAGACCGGA GTAA TCCAGGTC A-GTT  
 Macs CAACAA TTAA-A GTCCT ACCTGATCT GA GTT CAGACCGGA GTAA TCCAGGTC A-GTT  
 Moal CAACGA TTAA-A GTCCT ACCTGATCT GA GTT CAGACCGGA GTAA TCCAGGTC A-GTT  
 Syma CAACGA TTAA-A GTCCT ACCTGATCT GA GTT CAGACCGGA GTAA TCCAGGTC A-GTT  
 Maf r CAACGA TTAA-A GTCCT ACCTGATCT GA GTT CAGACCGGA GTAA TCCAGGTC A-GTT  
 Dcpe CAACGA TTAATA GTCCT ACCTGATCT GA GTT CAGACCGGA GTAA TCCAGGTC A-GTT  
 Dct i CAACGA TTAATA GTCCT ACCTGATCT GA GTT CAGACCGGA GTAA TCCAGGTC A-GTT  
 Hehi CAACGG TTAA-A GTCCT ACCTGATCT GA GTT CAGACCGGA GTAA TCCAGGTC A-GTT  
 Stam CAACGA TTAA-A GTCCT ACCTGATCT GA GTT CAGACCGGA GTAA TCCAGGTC A-GTT  
 Hogi CAACGA TTAA-A GTCCT ACCTGATCT GA GTT CAGACCGGA GTAA TCCAGGTC A-GTT  
 Erzo CAACGA TTAA-A GTCCT ACCTGATCT GA GTT CAGACCGGA GTAA TCCAGGTC A-GTT  
 Hxot CAACGA TTAA-A GTCCT ACCTGATCT GA GTT CAGACCGGA GTAA TCCAGGTC A-GTT  
 Core CAACGA TTAA-A GTCCT ACCTGATCT GA GTT CAGACCGGA GTAA TCCAGGTC A-GTT  
 Apve CAACGA TTAA-A GTCCT ACCTGATCT GA GTT CAGACCGGA GTAA TCCAGGTC A-GTT  
 Lat j CAACGA TTAA-A GTCCT ACCTGATCT GA GTT CAGACCGGA GTAA TCCAGGTC A-GTT  
 Laja CAACGA TTAA-A GTCCT ACCTGATCT GA GTT CAGACCGGA GCAA TCCAGGTC A-GTT

Syja CAACGA TTAA-AGTCCTACGTGATCTGAGTT CAGACCGGA GTAA TCCAGGTC G-GTT  
 Epme CAACGA TTAA-AGTCCTACGTGATCTGAGTT CAGACCGGA GTAA TCCAGGTC G-GTT  
 Grse CAACGA TTAA-AGTCCTACGTGATCTGAGTT CAGACCGGA GTAA TCCAGGTC A-GTT  
 Clja CAACGA TTAA-AGTCCTACGTGATCTGAGTT CAGACCGGA GTAA TCCAGGTC G-GTT  
 Ogcy CAACGA TTAA-AGTCCTACGTGATCTGAGTT CAGACCGGA GTAA TCCAGGTC A-GTT  
 Plna CAACGA TTAATA GTCCTACGTGATCTGAGTT CAGACCGGA GTAA TCCAGGTC A-GTT  
 Lema CAACGA TTAA-AGTCCTACGTGATCTGAGTT CAGACCGGA GTAA TCCAGGTC A-GTT  
 Etzo CAACGA TTAA-AGTCCTACGTGATCTGAGTT CAGACCGGA GTAA TCCAGGTC A-GTT  
 Apse CAACGA TTAA-AGTCCTACGTGATCTGAGTT CAGACCGGA GTAA TCCAGGTC A-GTT  
 Epde CAACGA TTAA-AGTCCTACGTGATCTGAGTT CAGACCGGA GAAA TCCAGGTC A-GTT  
 Slja CAACGA TTAA-AGTCCTACGTGATCTGAGTT CAGACCGGA GTAA TCCAGGTC G-GTT  
 Bsja CAACGA TTAA-AGTCCTACGTGATCTGAGTT CAGACCGGA GCAA TCCAGGTC A-GCT  
 Ecna CAACGA TTAA-AGTCCTACGTGATCTGAGTT CAGACCGGA GTAA TCCAGGTC A-GTT  
 Cohi CAACGA TTAA-AGTCCTACGTGATCTGAGTT CAGACCGGA GTAA TCCAGGTC A-GTT  
 Caar CAACGA TTAA-AGTCCTACGTGATCTGAGTT CAGACCGGA GTAA TCCAGGTC A-GTT  
 Came CAACGA TTAA-AGTCCTACGTGATCTGAGTT CAGACCGGA GTAA TCCAGGTC A-GTT  
 Mema CAACGA TTAA-AGTCCTACGTGATCTGAGTT CAGACCGGA GTAA TCCAGGTC A-GTT  
 Lenu CAACGA TTAA-AGCCCTACGTGATCTGAGTT CAGACCGGA GTAA TCCAGGTC A-GTT  
 Brja CAACGA TTAA-AGTCCTACGTGATCTGAGTT CAGACCGGA GTAA TCCAGGTC A-GTT  
 Plma CAACGA TTAA-AGTCCTACGTGATCTGAGTT CAGACCGGA GTAA TCCAGGTC A-GTT  
 Emst CAACGA TTAA-AGTCCTACGTGATCTGAGTT CAGACCGGA GTAA TCCAGGTC A-GTT  
 Ptti CAACGA TTAA-AGTCCTACGTGATCTGAGTT CAGACCGGA GTAA TCCAGGTC A-GTT  
 Losu CAACGA TTAA-AGTCCTACGTGATCTGAGTT CAGACCGGA GTAA TCCAGGTC A-GTT  
 Geoy CAACGA TTAACA GTCCTACGTGATCTGAGTT CAGACCGGA GTAA TCCAGGTC A-GTT  
 Dipi CAACGA TTAA-AGTCCTACGTGATCTGAGTT CAGACCGGA GTAA TCCAGGTC A-GTT  
 Pama CAACGA TTAA-AGTCCTACGTGATCTGAGTT CAGACCGGA GTAA TCCAGGTC A-GTT  
 Leob CAACGA TTAA-AGTCCTACGTGATCTGAGTT CAGACCGGA GTAA TCCAGGTC A-GTT  
 Neba CAACGA TTAA-AGTCCTACGTGATCTGAGTT CAGACCGGA GTAA TCCAGGTC A-GTT  
 Pdpi CAACGA TTAA-AGTCCTACGTGATCTGAGTT CAGACCGGA GCAA TCCAGGTC A-GTT  
 Nimi CAACGA TTAATA GTCCTACGTGATCTGAGTT CAGACCGGA GCAA TCCAGGTC A-GTT  
 Uptr CAACGA TTAA-AGTCCTACGTGATCTGAGTT CAGACCGGA GTAA TCCAGGTC A-GTT  
 Pesc CAACGA TTAA-AGTCCTACGTGATCTGAGTT CAGACCGGA GTAA TCCAGGTC A-GTT  
 Baar CAACGA TTAA-AGTCCTACGTGATCTGAGTT CAGACCGGA GTAA TCCAGGTC G-GTT  
 Moar CAACGA TTAA-AGTCCTACGTGATCTGAGTT CAGACCGGA GTAA TCCAGGTC A-GTT  
 Toja CAACGA TTAA-AGTCCTACGTGATCTGAGTT CAGACCGGA GTAA TCCAGGTC A-GTT  
 Chau CAACGA TTAA-AGTCCTACGTGATCTGAGTT CAGACCGGA GTAA TCCAGGTC A-GTT  
 Chse CAACGA TTAA-AGTCCTACGTGATCTGAGTT CAGACCGGA GTAA TCCAGGTC A-GTT  
 Enar CAACGA TTAA-AGTCCTACGTGATCTGAGTT CAGACCGGA GTAA TCCAGGTC A-GTT  
 Hpty CAACGA TTAA-AGTCCTACGTGATCTGAGTT CAGACCGGA GTAA TCCAGGTC A-GTT  
 Nana CAACGA TTAA-AGTCCTACGTGATCTGAGTT CAGACCGGA GTAA TCCAGGTC A-GTT  
 Mcst CAACGA TTAA-AGTCCTACGTGATCTGAGTT CAGACCGGA GTAA TCCAGGTC A-GTT  
 Rhox CAACGA TTAA-AGTCCTACGTGATCTGAGTT CAGACCGGA GTAA TCCAGGTC A-GTT  
 Opfa CAACGA TTAA-AGTCCTACGTGATCTGAGTT CAGACCGGA GTAA TCCAGGTC A-GTT  
 Paar CAACGA TTAA-AGTCCTACGTGATCTGAGTT CAGACCGGA GTAA TCCAGGTC A-GTT  
 Gozo CAACGA TTAA-AGTCCTACGTGATCTGAGTT CAGACCGGA GTAA TCCAGGTC A-GTT  
 Ackr CAACGA TTAACA GTCCTACGTGATCTGAGTT CAGACCGGA GTAA TCCAGGTC A-GTT  
 Elev CAACGA TTAA-AGTCCTACGTGATCTGAGTT CAGACCGGA GTAA TCCAGGTC A-GTT  
 Trdu CAACGA TTAA-AGTCCTACGTGATCTGAGTT CAGACCGGA GTAA TCCAGGTC A-GTT  
 Amoc CAACGA TTAA-AGTCCTACGTGATCTGAGTT CAGACCGGA GCAA TCCAGGTC A-GTT  
 Hame CAACGA TTAA-AGTCCTACGTGATCTGAGTT CAGACCGGA GTAA TCCAGGTC A-GTT  
 Chso CAACGA TTAA-AGTCCTACGTGATCTGAGTT CAGACCGGA GCAA TCCAGGTC A-GTT  
 Lyto CAACGA TTAA-AGTCCTACGTGATCTGAGTT CAGACCGGA GTAA TCCAGGTC A-GTT



|      |                 |          |               |      |
|------|-----------------|----------|---------------|------|
| Scca | TCTA-----TCTATG | -AATTT-A | TTTTTCCTAGTAC | GAAA |
| Muma | TCTA-----TCTATG | -AATAT-A | CTTTTCCTAGTAC | GAAA |
| Erca | TCTA-----TCTATG | -AAGTT-A | TTTATCCTAGTAC | GAAA |
| Pose | TCTA-----TCTATG | -AAGTT-A | TTTATCCTAGTAC | GAAA |
| Actr | TCTA-----TCTATG | -CAGTG-A | CCCTTCCTAGTAC | GAAA |
| Scal | TCTA-----TCTATG | -CAGTG-A | CCCTTCCTAGTAC | GAAA |
| Posp | TCTA-----TCTATG | -CAGTG-A | CCCTTCCTAGTAC | GAAA |
| Atsp | TCTA-----TCTATG | -CAATG-A | CTCTTCTAGTAC  | GAAA |
| Leoc | TCTA-----TCTATG | -CAATG-A | CTCTTCTAGTAC  | GAAA |
| Amca | TCTA-----TCTATG | -AAGTG-G | TTCCCCCTAGTAC | GAAA |
| Osbi | TCTA-----TCTATG | -TAGCT-A | CTCTTCCTAGTAC | GAAA |
| Pabu | TCTA-----TCTATG | -ACATG-A | CCCTTCCAGTAC  | GAAA |
| Hial | TCTA-----TCTATG | -CAGTG-A | CCCTTCCTAGTAC | GAAA |
| Elha | TCTA-----TCTATG | -CAGTA-A | CCCTTCCTAGTAC | GAAA |
| Mlcy | TCTA-----TCTATG | -CAGTG-A | CTCCCCCAGTAC  | GAAA |
| Algl | TCTA-----TCTATG | -AAGTG-A | CTGTTCCTAGTAC | GAAA |
| Ptgi | TCTA-----TCTATG | -AAGTA-A | TTTTTCCTAGTAC | GAAA |
| Alaf | TCTA-----TCTATG | -ATGTA-A | CTTCTCCAGTAC  | GAAA |
| Nock | TCTA-----TCTATG | -ATGTA-A | CTTCTCCAGTAC  | GAAA |
| Anja | TCTA-----TCTATG | -AACT--  | CTTCTCCAGTAC  | GAAA |
| Gyki | TCTA-----TCTATG | -ATCTAAC | CTACCCCTAGTAC | GAAA |
| Syka | TCTA-----TCTATG | -AAATTAC | TTTTTCCTAGTAC | GAAA |
| Opma | TCTA-----TCTATG | -ACTTTAC | TTCTCCCAGTAC  | GAAA |
| Comy | TCTA-----TCTATG | -AAAGTGC | CTTTTCCTAGTAC | GAAA |
| Sasp | TCTA-----TCTATG | -AAAAA-C | CCACCCCTAGTAC | GAAA |
| Eupe | TCTA-----TCTATG | -T-CTA-  | CCACCCCTAGTAC | GAAA |
| Enja | TCTA-----TCTGTA | -AAGCC-A | TCACCCCTAGTAC | GAAA |
| Same | TCTA-----TCTGTC | -AAGCC-A | TCCTTCCTAGTAC | GAAA |
| Chch | TCTA-----TCTGCA | -ATAGTTC | TTTTTCCTAGTAC | GAAA |
| Grgr | TCTA-----TCTGCT | -AC-GCTA | CCTTTCCTAGTAC | GAAA |
| Caau | TCTA-----TCTGTA | -ACGCT-A | CTTTTCCTAGTAC | GAAA |
| Cyca | TCTA-----TCTGTA | -AC-GCTA | CTTTTCCTAGTAC | GAAA |
| Dare | TCTA-----TCTGTA | -AAGCTAT | TTTTTCCTAGTAC | GAAA |
| Cost | TCTA-----TCTGTA | -ACGTC-A | CTTTTCCTAGTAC | GAAA |
| Leec | TCTA-----TCTGTA | -AAGTC-G | TTTTTCCTAGTAC | GAAA |
| CrIa | TCTA-----TCTGTA | -AC-GTTA | CTTTTCCTAGTAC | GAAA |
| Clmc | TCTA-----TCTGTA | TCAAGCCA | TTTTTCCTAGTAC | GAAA |
| Phin | TCTA-----TCTGTA | -ATGC-TA | TTTTTCTAGTAC  | GAAA |
| Icpu | TCTA-----TCTGTA | -ATG-CCA | CTTTCCCAGTAC  | GAAA |
| Psto | TCTA-----TCTGTA | -ATGCC-A | CTTTTCCTAGTAC | GAAA |
| Cora | TCTA-----TCTGTA | -ACGCA-A | TTTCTCCAGTAC  | GAAA |
| Eisp | TCTA-----TCTGTA | -ATGTT-A | TTTCCTCAGTAC  | GAAA |
| Apal | TCTA-----TCTGTA | -ATGTC-A | CTTCTCCAGTAC  | GAAA |
| Eslu | TCTA-----TCTATG | -AA-GTAA | TCTTTCCAGTAC  | GAAA |
| Dape | TCTA-----TCTATG | -CTATG-A | TCTTCTTAGTAC  | GAAA |
| Glse | TCTA-----TCTATG | -ATGTA-A | CTCTCCCAGTAC  | GAAA |
| Naar | TCTA-----TCTATG | -ATGTA-A | CTTTCCCAGTAC  | GAAA |
| Baoc | TCTA-----TCTATG | -ATGTAAT | TTTTCCCAGTAC  | GAAA |
| Opso | TCTA-----TCTATG | -ACGTAA  | CCTTCCCAGTAC  | GAAA |
| Alte | TCTA-----TCTGTA | -ACGCTA  | CTTTTCCTAGTAC | GAAA |
| Plap | TCTA-----TCTGTA | -ACGCT-A | CTTTTCCTAGTAC | GAAA |

|      |                 |                 |           |          |      |
|------|-----------------|-----------------|-----------|----------|------|
| Plal | TCTA-----TCTATG | -AAATG-GTCTCTCC | CAGTAC    | GAAA     |      |
| Sami | TCTA-----TCTATG | -AGA-TGATCCCC   | CAGTAC    | GAAA     |      |
| Rere | TCTA-----TCTATG | -ACATA-CTCCTCC  | CAGTAC    | GAAA     |      |
| Gama | TCTA-----TCTATG | -ACGTG-ACCCTTT  | CTAGTAC   | GAAA     |      |
| Onmy | TCTA-----TCTATG | -AAGTG-ATGTTTT  | CTAGTAC   | GAAA     |      |
| Sasa | TCTA-----TCTATG | -AAGTG-ATGTTTT  | CTAGTAC   | GAAA     |      |
| Cola | TCTA-----TCTATG | -AAGTG-ATGTTTT  | CTAGTAC   | GAAA     |      |
| Dita | TCTA-----TCTATA | -AATGA-ATCTTCC  | CAGTAC    | GAAA     |      |
| Gogr | TCTA-----TCTATT | -AAG-TAGCCCTTC  | CAGTAC    | GAAA     |      |
| Chsl | TCTA-----TCTATA | -CCCC--ATCTTT   | CTAGTAC   | GAAA     |      |
| Atja | TCTA-----TCTATG | -ATGTA-GCTTACC  | CTAGTAC   | GAAA     |      |
| lido | TCTA-----TCTATG | -ATGTG-GTTTACC  | CTAGTAC   | GAAA     |      |
| Auja | TCTA-----TCTATG | -ACCTTGA        | TCTTCC    | CAGTAC   | GAAA |
| Chag | TCTA-----TCTATG | -ACT-TGC        | TCTTCT    | CTAGTAC  | GAAA |
| Hami | TCTA-----TCTATG | -GTAATGC        | TCTTTT    | CTAGTAC  | GAAA |
| Saun | TCTA-----TCTATG | -GTCATGC        | TCTTTT    | CTAGTAC  | GAAA |
| Nema | TCTA-----TCTACG | -TAAT-GATCTCTT  | CTAGTAC   | GAAA     |      |
| Disp | TCTA-----TCTACG | -CATTG-ATCTTT   | CTAGTAC   | GAAA     |      |
| Myaf | TCTA-----TCTACG | -CATTG-ATTTT    | CTCT      | CTAGTAC  | GAAA |
| Lagu | TCTA-----TCTGTG | -AT-ATGT        | TCTTTT    | CTAGTAC  | GAAA |
| Trtr | TCTA-----TCTGTG | -A-TGATA        | TCTTTT    | CTAGTAC  | GAAA |
| Zucr | TCTA-----TCTGTG | -AAACT-ATCTTTT  | CTAGTAC   | GAAA     |      |
| Pxja | TCTA-----TCTATG | -AATTTGA        | CCTTTT    | CTATTAC  | GAAA |
| Pxlo | TCTA-----TCTATG | -AA-TTGA        | CCTTTT    | CTAGTAC  | GAA- |
| Pctr | TCTA-----TCTATG | -AAATG-CTCTCT   | CTCAGTAC  | GAAA     |      |
| Apsa | TCTA-----TCTATG | -AT-TG-TCTTTT   | CTCAGTAC  | GAAA     |      |
| Cabe | TCTA-----TCTGTG | -AAAACAC        | CTCTGCC   | TTGTAC   | GAAA |
| Bzze | TCTA-----TCTATG | -AAACAGC        | CTTTTT    | CTAGTAC  | GAAA |
| Siim | TCTA-----TCTATG | -AAAATAT        | CTTCTT    | CTAGTAC  | GAAA |
| Ctru | TCTA-----TCTATG | -AAGTGA         | CCTTTT    | CTAGTAC  | GAAA |
| Dpbr | TCTA-----TCTATG | -AAGTG-ACCCTTT  | CTAGTAC   | GAAA     |      |
| Caki | TCTA-----TCTATA | -AAAAG-TCTTTT   | CTCAGTAC  | GAAA     |      |
| Phja | TCTA-----TCTATA | -AAG-AGCTTTTT   | TATAGTAC  | GAAA     |      |
| Brsp | TCTA-----TCTATG | -AATT-GTTTT     | CTCC      | CTAGTAC  | GAAA |
| Gamo | TCTA-----TCTATG | -ACAA-GCT       | CTTTTT    | CTCAGTAC | GAAA |
| Lolo | TCTA-----TCTATG | -ACAAG-CTCTTT   | CTCAGTAC  | GAAA     |      |
| Batr | TCTA-----TCTATA | -ACATTGC        | TTTTTT    | CTCAGTAC | GAAA |
| Prmy | TCTA-----TCTATA | -TTTTA-TTTTT    | CTT       | CAGTAC   | GAAA |
| Loli | TCTA-----TCTATG | -ATGT-GATCTTTT  | CTAGTAC   | GCAA     |      |
| Loam | TCTA-----TCTATG | -ACATG-ATCTTTT  | CTAGTAC   | GCAA     |      |
| Chab | TCTA-----TCTATG | -GTGTG-ATCTTTT  | CTAGTAC   | GCAA     |      |
| Chto | TCTA-----TCTATG | -GTGTG-ATCTTTT  | CTAGTAC   | GCAA     |      |
| Majo | TCTA-----TCTATA | -ACATG-CTTTTT   | CTAGTAC   | GCAA     |      |
| Hlst | TCTA-----TCTATA | -ATATG-CTTTTT   | CTCAGTAC  | GCAA     |      |
| Clpe | TCTA-----TCTATG | -ATATG-CTTTTT   | CTAGTAC   | GCAA     |      |
| Mlmr | TCTA-----TCTATG | -ATATG-CTTTTT   | CTAGTAC   | GCAA     |      |
| Crcr | TCTA-----TCTATG | -ATACA-TTCTCCT  | CTCAGTAC  | GAAA     |      |
| Muce | TCTA-----TCTATG | -ATACA-TTCTCCT  | CTCAGTAC  | GAAA     |      |
| Bege | TCTA-----TCTATG | -TAATG-ATTTCT   | CTCTAGTAC | GAAA     |      |
| Mela | TCTA-----TCTATG | -TTATG-CTTTCT   | CTCTAGTAC | GAAA     |      |
| Hats | TCTA-----TCTATG | -AAATG-ATCTCT   | CTCTAGTAC | GAAA     |      |
| Orla | TCTA-----TCTATG | -ACATA-CTCCCT   | CTCTAGTAC | GAAA     |      |

|      |                 |                         |      |
|------|-----------------|-------------------------|------|
| Cosa | TCTA-----TCTATG | -AAA-TGTCTTCCTCTAGTAC   | GAAA |
| Exsp | TCTA-----TCTATG | -AGATG-TTCTCTTCTAGTAC   | GAAA |
| Depa | TCTA-----TCTATG | -ATGTC-TCTTCCCTAGTAC    | GAAA |
| Rima | TCTA-----TCTATG | -ACCGTGCCTTCTTTCAGTAC   | GAAA |
| Fuol | TCTA-----TCTATG | -AAATA-TTTTCTTCTAGTAC   | GAAA |
| Gmaf | TCTA-----TCTATG | -AA-GTGTCTTCTTCCAGTAC   | GAAA |
| Xeei | TCTA-----TCTATG | -AAATG-ATTTCTTCTAGTAC   | GAAA |
| Pros | TCTA-----TCTATG | -GTGTAATCTCTTTCTAGTAC   | GAAA |
| Scmi | TCTA-----TCTATG | -ATGTGATCTCTTTCTAGTAC   | GAAA |
| Rolo | TCTA-----TCTATG | -ATATG-ATCTTTTTCTAGTAC  | GAAA |
| Cere | TCTA-----TCTATG | -GTATG-ATCTTTTCCAGTAC   | GAAA |
| Daga | TCTA-----TCTATG | -GAGTG-ATCTTTTTCTAGTAC  | GAAA |
| Anco | TCTA-----TCTATA | -ATATG-ATCTTTTTCTAGTAC  | GAAA |
| Dmve | TCTA-----TCTATG | -ACAT-GCTCTTTTTCCAGTAC  | GAAA |
| Dmar | TCTA-----TCTATG | -CTGTG-CCTCTTTTTCTAGTAC | GAAA |
| Anka | TCTA-----TCTATG | -CTATG-ATCTTTTTCTAGTAC  | GAAA |
| Moja | TCTA-----TCTATG | -ATGTG-ATCTTTTCCAGTAC   | GAAA |
| Hoja | TCTA-----TCTATG | -ATATG-ATCTTTTTCTAGTAC  | GAAA |
| Bede | TCTA-----TCTATG | -ATGTGATCTTCTTCTAGTAC   | GAAA |
| Besp | TCTA-----TCTATG | -ATATGATCTTCTTCTAGTAC   | GAAA |
| Mysp | TCTA-----TCTATG | -ACATG-TCTTTTTCTAGTAC   | GAAA |
| Osja | TCTA-----TCTATG | -ACATGTCTTTTTCTAGTAC    | GAAA |
| Sgro | TCTA-----TCTATG | -CTATG-TCTTTTTCCAGTAC   | GAAA |
| Pzpa | TCTA-----TCTATG | -AAAT-GCTCTTTTTCTAGTAC  | GAAA |
| Zeja | TCTA-----TCTATG | -AAACATCTTCTTCCAGTAC    | GAAA |
| Zzne | TCTA-----TCTATA | -AAAAT-TTCTCTCTCCAGTAC  | GAAA |
| Zefa | TCTA-----TCTATA | -AGACGATCTCTCTCTCCAGTAC | GAAA |
| Acni | TCTA-----TCTATG | -AAAT-ATCTTTTTCCAGTAC   | GAAA |
| Ncrh | TCTA-----TCTATG | -AAATA-TCTTTTTCCAGTAC   | GAAA |
| Agca | TCTA-----TCTATG | -ACATGATCTTTTTCTAGTAC   | GAAA |
| Hydy | TCTA-----TCTATG | -CTGTG-CCTTCTTCTAGTAC   | GAAA |
| Gsac | TCTA-----TCTATG | -CTGTGCCTTCTTCTAGTAC    | GAAA |
| Pevo | TCTA-----TCTATG | -AATATGGCTTTTTCTAGTAC   | GAAA |
| Hiku | TCTA-----TCTATG | -TATGTGGCCTTCTTTCAGTAC  | GAAA |
| Inpa | TCTA-----TCTATG | -ACA-CGCCTTTTTCCAGTAC   | GAAA |
| Auch | TCTA-----TCTATG | -AATGTGCCCTTCTCCAGTAC   | GAAA |
| Fico | TCTA-----TCTATG | -AAGC-ACCTTTCCCTAGTAC   | GAAA |
| Macs | TCTA-----TCTATG | -AT-ATGCCTTTTTCTAGTAC   | GAAA |
| Moal | TCTA-----TCTATG | -ATACAGTTTTTTTCCAGTAC   | GAAA |
| Syma | TCTA-----TCTATG | -TTATA-CTTTTTCTAGTAC    | GAAA |
| Mafr | TCTA-----TCTATG | -ATATG-ATCTTTTTCCAGTAC  | GAAA |
| Dcpe | TCTA-----TCTATG | -AA-GTGTCTTTTTCTAGTAC   | GAAA |
| Dcti | TCTA-----TCTATG | -AAGTG-TCTTTTCTAGTAC    | GAAA |
| Hehi | TCTA-----TCTATG | -GTGTG-CCTTTTTCTAGTAC   | GAAA |
| Stam | TCTA-----TCTATG | -ATAT-GATCTTTTTCTAGTAC  | GAAA |
| Hogi | TCTA-----TCTATG | -AAATTACCCTTTTTCTAGTAC  | GAAA |
| Erzo | TCTA-----TCTATG | -CTATG-CCTTTTTCTAGTAC   | GAAA |
| Hxot | TCTA-----TCTATG | -ATATG-ATTTTTTCTAGTAC   | GAAA |
| Core | TCTA-----TCTATG | -CTA-TGCCTTTTTCTAGTAC   | GAAA |
| Apve | TCTA-----TCTATG | -CTAT-GATTTTTTCTAGTAC   | GAAA |
| Latj | TCTA-----TCTATG | -CCCACGTCTTTTTTCTAGTAC  | GAAA |
| Laja | TCTA-----TCTATG | -ACATG-ATCTTCTCTAGTAC   | GAAA |



|      |                 |                        |      |
|------|-----------------|------------------------|------|
| Syja | TCTA-----TCTATT | -GTATG-ACCTTCTCCAGTAC  | GAAA |
| Epme | TCTA-----TCTATG | -TAT-TGATCTTTTCTAGTAC  | GAAA |
| Grse | TCTA-----TCTATG | -ACATG-ATCTTTTCCAGTAC  | GAAA |
| Clja | TCTA-----TCTATG | -ATA-TGACCTTTTCTAGTAC  | GAAA |
| Ogcy | TCTA-----TCTATG | -TAATGCCTTTCTCTAGTAC   | GAAA |
| Plna | TCTA-----TCTATG | -ATATG-ACTTTTCTAGTAC   | GAAA |
| Lema | TCTA-----TCTATG | -CAATG-ATTTTTTCTAGTAC  | GAAA |
| Etzo | TCTA-----TCTATG | -ATA-TGATCTTCTCTAGTAC  | GAAA |
| Apse | TCTA-----TCTATG | -AT-ATGTTTTTCTAGTAC    | GAAA |
| Epde | TCTA-----TCTATG | -CTAT-GATCTTTTCTAGTAC  | GAAA |
| Slja | TCTA-----TCTATG | -TTAT-GATCTTTTCTAGTAC  | GAAA |
| Bsja | TCTA-----TCTATG | -ACAT-GAAGTTTTCTAGTAC  | GAAA |
| Ecna | TCTA-----TCTATG | -AAA-TAATCTTTTCTAGTAC  | GAAA |
| Cohi | TCTA-----TCTATG | -TAGTA-TCTTTTCTAGTAC   | GAAA |
| Caar | TCTA-----TCTATG | -AAGCA-ATCTTTTCTAGTAC  | GAAA |
| Came | TCTA-----TCTATG | -AAGTTAATCTTTTCTAGTAC  | GAAA |
| Mema | TCTA-----TCTATG | -AAACG-ATCTTTTCCAGTAC  | GAAA |
| Lenu | TCTA-----TCTATG | -ACCC-ACCCTTCCAGTAC    | GAAA |
| Brja | TCTA-----TCTATG | -ATATG-TTTTTTCTAGTAC   | GAAA |
| Plma | TCTA-----TCTATG | -TTATGTTCTTTTCTAGTAC   | GAAA |
| Emst | TCTA-----TCTATG | -ATATG-ATCTTTTCTAGTAC  | GAAA |
| Ptti | TCTA-----TCTATG | -AAGTG-ATCTTTTCTAGTAC  | GAAA |
| Losu | TCTA-----TCTATG | -ATATGATCTTCCCAGTAC    | GAAA |
| Geoy | TCTA-----TCTATG | -AAGTATCCTTCTCTAGTAC   | GAAA |
| Dipi | TCTA-----TCTATG | -ACA-TGATCTTTTCTAGTAC  | GAAA |
| Pama | TCTA-----TCTATG | -A-TGTGACCTTTTCTAGTAC  | GAAA |
| Leob | TCTA-----TCTATG | -ATA-CGACCTTTTCTAGTAC  | GAAA |
| Neba | TCTA-----TCTATG | -TAATGTTCCCTTCTAGTAC   | GAAA |
| Pdpl | TCTA-----TCTATG | -AC-GCAATCTTTTCTAGTAC  | GAAA |
| Nimi | TCTA-----TCTATG | -CTTTA-ATCTTTTCTAGTAC  | GAAA |
| Uptr | TCTA-----TCTATG | -AA-GCGATCTTTTCTAGTAC  | GAAA |
| Pesc | TCTA-----TCTATG | -TGT-TACTTTTCTAGTAC    | GAAA |
| Baar | TCTA-----TCTATG | -ACATG-TCTTCTCCAGTAC   | GAAA |
| Moar | TCTA-----TCTATG | A--TATGATCTTTTCTAGTAC  | GAAA |
| Toja | TCTA-----TCTATG | -TTATG-ATCTTTTCTAGTAC  | GAAA |
| Chau | TCTA-----TCTATG | -ACA-TACTTTTTCTAGTAC   | GAAA |
| Chse | TCCA-----TCTATG | -AAAT-GTCTTTTCCAGTAC   | GAAA |
| Enar | TCTA-----TCTATG | -ACATG-ATCTTTTCTAGTAC  | GAAA |
| Hpty | TCTA-----TCTATG | -ACATG-ATCTTTTCTAGTAC  | GAAA |
| Nana | TCTA-----TCTATG | -ATACG-ATCTTTTCTAGTAC  | GAAA |
| Mcst | TCTA-----TCTATG | -ACATG-AGCTTTTCTAGTAC  | GAAA |
| Rhox | TCTA-----TCTATG | -ACA-CGAGCTTCTCTAGTAC  | GAAA |
| Opfa | TCTA-----TCTATG | -A-TATGATCTTTTCTAGTAC  | GAAA |
| Paar | TCTA-----TCTATA | --ATGTGATCTTTTCTAGTAC  | GAAA |
| Gozo | TCTA-----TCTATG | -ACA-TGATCTTTCCAGTAC   | GAAA |
| Ackr | TCTA-----TCTATG | -CAGT-GAGCTTTTCTAGTAC  | GAAA |
| Elev | TCTA-----TCTATG | -AAAT-GATCTTTTCTAGTAC  | GAAA |
| Trdu | TCTA-----TCTATG | -TC-ACGATCTTTTCTAGTAC  | GAAA |
| Amoc | TCTA-----TCTATG | -ACAT-GAGCTTTTCTAGTAC  | GAAA |
| Hame | TCTA-----TCTATG | -TTAT-GGCCCTTTTCTAGTAC | GAAA |
| Chso | TCTA-----TCTATG | -A-CACCATTTTTTCTAGTAC  | GAAA |
| Lyto | TCTA-----TCTATG | -CAGT-GCTTTTTCTAGTAC   | GAAA |

|      |                               |          |                |               |      |
|------|-------------------------------|----------|----------------|---------------|------|
| Encr | TCTA-----TCTATG               | -CTA-TGC | TTTTTCTAGTAC   | GAAA          |      |
| Bvar | TCTA-----TCTATG               | -ATATGT  | TCTTCCCAGTAC   | GAGA          |      |
| Noco | TCTA-----TCTATG               | -ACATA-T | TCTTTTCTAGTAC  | GAAA          |      |
| Chsp | TCTA-----TCTATG               | -ATAATAA | TATTCTT TAGTAC | GAAA          |      |
| Arja | TCTA-----TCTATG               | -CTATG-A | TCTTTTCTAGTAC  | GAAA          |      |
| Pase | TCTA-----TCTATG               | -CCATA-C | CCTCTCC TAGTAC | GAAA          |      |
| Trel | TCTA-----TCTATT               | -AAGTA-G | CCCTCTC TAGTAC | GAAA          |      |
| Lifa | TCTA-----TCTATG               | -CCA-TGA | TCTTTTCTAGTAC  | GAAA          |      |
| Acur | TCTA-----TCTATA               | -ACATTGT | CCTTTTCTAGTAC  | GAAA          |      |
| Ampe | TCTA-----TCTATG               | -ATAT-GC | TCTTTCC TAGTAC | GAAA          |      |
| Urja | TCTA-----TCTATG               | -AAAT-GA | TTTTTTCAGTAC   | GAAA          |      |
| Enet | TCTA-----TCTATG               | -CCGTGC  | TTTTTTC TAGTAC | GAAA          |      |
| Ptbr | TCTA-----TCTATG               | -ATTAAT  | TCTTTTCTAGTAC  | GAAA          |      |
| Safa | TCTA-----TCTATG               | -CAATGT  | CCTTTTCCAGTAC  | GAAA          |      |
| Icae | TCTA-----TCTATG               | -ACAT-GT | TCTTCTC TAGTAC | GAAA          |      |
| Asmi | TTTA-----CCTATG               | -CAGCA-T | CCTTTCC TAGTAC | GAAA          |      |
| Foal | TCTA-----TCTATG               | -ATTACCG | CTTTTTCTAGTAC  | GAAA          |      |
| Drze | TCTA-----TCTATA               | -AAATG-A | TTTTTTC TAGTAC | GAAA          |      |
| Rhas | TCTACCGGAGAAATCCAGGTCAGTTTCTA | TCTACC   | -AAA-TGT       | TCTTTTCTAGTAC | GAAA |
| Elac | TCTA-----TCTATG               | -GAGTA-T | TCTTTTCTAGTAC  | GAAA          |      |
| Kugu | TCTA-----TCTATG               | -TAATG-A | TCTTTTCTAGTAC  | GAAA          |      |
| Plor | TCTA-----TCTATG               | -ATATG-A | TCTTTTCTAGTAC  | GAAA          |      |
| Sgun | TCTA-----TCTACC               | -ATGTG-A | TCTTTTCTAGTAC  | GAAA          |      |
| Zaco | TCTA-----TCTATG               | -ACATG-A | TCTTTTCTAGTAC  | GAAA          |      |
| Zbfl | TCTA-----TCTATG               | -ATTTG-A | TCTTTTCTAGTAC  | GAAA          |      |
| Spba | TCTA-----TCTATG               | -TAATTA  | CCTTTTCTAGTAC  | GAAA          |      |
| Game | TCTA-----TCTATG               | -GTGTG-T | TCTTTTCTAGTAC  | GAAA          |      |
| Thth | TCTA-----TCTATG               | -ATATG-T | TCTTTTCTAGTAC  | GAAA          |      |
| Xigl | TCTA-----TCTATG               | -TTAT-GA | TCTTTTCTAGTAC  | GAAA          |      |
| Hyja | TCTA-----TCTATG               | -ACATG-T | TCTTTTCTAGTAC  | GAAA          |      |
| Psan | TCTA-----TCTATG               | -TTGTG-T | TTTTTTC TAGTAC | GAAA          |      |
| Cupa | TCTA-----TCTATG               | -CT-ATGT | TCTTTTCTAGTAC  | GAAA          |      |
| Mpch | TCTA-----TCTATG               | -CTATG-A | TCTTTTCTAGTAC  | GAAA          |      |
| Char | TCTA-----TCTATG               | -AGATG-T | TTTTTTC TAGTAC | GAAA          |      |
| Pser | TCTA-----TCTATG               | -AAATG-A | TCTTTTCTAGTAC  | GAAA          |      |
| Prol | TCTA-----TCTATG               | -TGATG-A | TCTTTTCTAGTAC  | GAAA          |      |
| Plbi | TCTA-----TCTATG               | -AC-ATGA | TCTTTTCTAGTAC  | GAAA          |      |
| Calu | TCTA-----TCTATG               | -GAGACGC | TTTTTTC TAGTAC | GAAA          |      |
| Papa | TCTA-----CCTATG               | -GTGTT-A | TCTTTTT TAGTAC | GAAA          |      |
| Sufr | TCTA-----TCTATG               | -ACGCAAT | CCTTTTI TAGTAC | GAAA          |      |
| Stci | TCTA-----TCTATG               | -ATGTA-A | TTTATTI CAGTAC | GAAA          |      |
| Taru | TCTA-----TCTATG               | -AAGTA-C | CTTTTTCCAGTAC  | GAAA          |      |
| Rala | TCTA-----TCTATG               | -CTAT-GA | TCTTTTCTAGTAC  | GAAA          |      |

\*

\*\*

\*\*\*

|      | 55'              | 56           | 56'              | 57                      |
|------|------------------|--------------|------------------|-------------------------|
| Scca | GGA-CCGGAGAAAT-  | GGGGCCAATAC  | CATT-GGCAAGCCTC  | -ATTTTC-ATCTATTCAACCAA  |
| Muma | GGA-CCGGAAAAGT-  | GGGGCCAATGC  | TA-CCAAGCAGCCCC  | -ATTTTCA-TCTATTCAATAAA  |
| Erca | GGA-TTGGATAAAAT- | AGGGCTATAT   | TAA-AAACAGCCCTI  | -ACTTTAAC-CTGTTCAAACCA  |
| Pose | GGA-TTGGATAAAAT- | GAGGCCTATAT  | -TTAAGACAGCCTC   | -CCT-TTAACCTGCTCAAGCCA  |
| Actr | GGA-CCGGAAGGCT-  | GAGGCCAATGC  | TACA-AGTATGCCTC  | -ACCCCA-ACCTAGTCAAAACA  |
| Scal | GGA-CCGGAAGGCT-  | GGGGCCAATGC  | TACA-AGTATGCCAC  | -ACCCCA-ACCTAATCAAGACA  |
| Posp | GGA-CCGGAAGGCT-  | GGGGCCAATAC  | TACA-AGCAGCCCC   | -ACC-CCAACCTAATCAAAACA  |
| Atsp | GGA-CCGAAAGAAG-  | AGGGCCAATTC  | TCCA-AGTACGCCCTI | -ATCC-TCACCCAATCAACACA  |
| Leoc | GGA-TCGAAAGAAG-  | GGGGCTATTC   | TCCA-AGCAGCCCC   | -ATCCT-CATTCACCTCAACACA |
| Amca | GGA-CCGGGAGAAC-  | AGGGCCAATGC  | -TAAAAGTATGCCCTI | -ATC-CCCACCTAATCAAATCA  |
| Osbi | GGA-CCGGAAGAAG-  | GAAGCCAATAT  | TCTA-AATACGCTTC  | -ATTC-CTACTTAATCAAAACA  |
| Pabu | GGA-CCGGAAGAAA-  | TGAGGCCAATAC | TACA-AGCAGCCTC   | -ACCTC-TACTGTTCAAAACA   |
| Hial | GGA-CCGGAAGGAG-  | GGGGCCAATTC  | TAAA-AGTACGCCCC  | -ACCCCA-TCTGATCAAATCA   |
| Elha | GGA-CCGGGAGGGA-  | GGGGCCAATGC  | CCACAAACAAGCCCC  | -ACCCCA-ATCCAATCAAAACA  |
| Mlcy | GGA-CCGGGGAAAT-  | GGGGCCAATAC  | CAAA-AGCAGCCCC   | -ACCCCA-ACCCGCCAAAAACA  |
| Algl | GGA-CCGGAAAAGA-  | AGGGCCAATGC  | TACA-GGTAAAGCCCC | -CCTTCC-ATCTACTCTIAGGCA |
| Ptgi | GGA-CCGGAAAAAG-  | GGGGCCAATAC  | TGAA-AGCAAGCCCC  | -ACCCCA-ACCTGCTCAAAACA  |
| Alaf | GGG-CCGGAGAAGT-  | GAGGCCCTAC   | TAACAAACAAGCCTC  | -TCCCC-ACCTGCTCAAAACA   |
| Nock | GGG-CCGGAGAAGT-  | GAGGCCCTAC   | TAAA-AGCAAGCCTI  | -ACCCCA-ACCTGTTCAAAACA  |
| Anja | GGA-CCGGAATGAA-  | GAGGGCCAATAC | TAAA-AGCAAGCCCTI | -ACCTCTACTGCTCAAAGCA    |
| Gyki | GGA-CCGGAGTAAG-  | GGGGCCAATCGA | GA-A-ACAAGCCCC   | -ACCCCA-ACCCCTCAAAACA   |
| Syka | GGA-CCGGAATAAA-  | GGGGCCAATAC  | TGAA-AGCAAGCCCC  | -ACC-TCTACTACTCAAAACA   |
| Opma | GGA-CCGGGAAAAAG- | AGGGCCAATAC  | TAAA-AGCAAGCCCC  | -ACCTCA-ACCCCTCAAGACA   |
| Comy | GGG-CCGGAAAAGG-  | GGGGCCAATTC  | -TAAAAACAAGCCCTI | -ACCACCACCTCTCTCAAAACA  |
| Sasp | GGG-CCGGGGTGGG-  | AAGGCCCTGTI  | TAAA-ACAAGCCTI   | -ACCCACACCCTACTGAAAAATA |
| Eupe | GGG-CCGGAGTGGG-  | GGGGCCCTAC   | TAAAAGCAAGCCCTA  | -CCTTC--ACCTGTTCAAATCA  |
| Enja | GGA-CCGGAGTGAA-  | GGGGCTATGC   | TAGA-AGCAAGCCCC  | -ATATC-TACTGCTCAAATCA   |
| Same | GGA-CCGGAGTAAT-  | GAGGCCTATGC  | CCCG-AGCAGCCTC   | -CCCCCA-ACCTGCTCAATACA  |
| Chch | GGA-CCGGAAAAAG-  | GGGGCTCAC    | CTCT-GATCGCCCC   | -ACTTTTA-CTGCTCAATACA   |
| Grgr | GGA-CCGGGAAGAG-  | GGGGCCAATGC  | CAGA-GCAGCCCC    | -GCCCT-ACCTGATCAAGCCA   |
| Caau | GGA-TCGGAAAAGG-  | GGGGCCAATGC  | -TCAAGGCAAGCCCC  | -ACC-CCTAAATTAATCAAAACA |
| Cyca | GGA-TCGGAAAAGG-  | GGGGCCAATAC  | TTAA-AGCAGCCCC   | -ACCCCT-AAATTAATCAAAACA |
| Dare | GGA-TCGGAAAAGG-  | GGGGCCAATAC  | TAAA-AGCAGCCCC   | -ACCCTA-AAATTAATCAATAAA |
| Cost | GGA-CCGGAAAAGG-  | GAGGCCAATGC  | CAAA-GGTACGCCTC  | -ACCCAT-AAATTAATCAAAACA |
| Leec | GGA-CCGGAAAAGG-  | AAGGCCAATGC  | CAAA-GCAGCCTI    | -ACCCCT-AAATTAATCAAGACA |
| CrIa | GGA-CCGGAAAAGG-  | AGGGCCAATCAC | TAAA-AGTGCGCCCTI | -ACCCCT-AAATTAATCAAAACA |
| Clmc | GGA-CCGGAAAAAT-  | AAGGTCCAATGC | CAAA-AGCAACCTI   | -ACTCCA-ATTTGATCAAATCA  |
| Phin | GGA-CCGAGAAAAAT- | GAGGCCCTGC   | TTTA-AGCAGCCTC   | -CCTCTAACATTAATCAAAACA  |
| Icpu | GGA-CCGGAAAAGG-  | GGGGCCAATAC  | TATA-AGCAGCCCC   | -ACCCCA-ACCTAATCAATACA  |
| Psto | GGA-CCGGAAAAGG-  | GGGGCCAATAT  | TATT-AATACGCCCC  | -ACCACT-ATTAATCAAAACA   |
| Cora | GGA-CCGGAAAAGG-  | AGGGCCAATGTI | TTA-AAACAAGCCCTI | -TATCCA-ATCTAATCAAAACA  |
| Eisp | GGA-CCGAAGAAAT-  | AAGGCCAATGC  | TATA-AGCAGCCTI   | -GCCCC-CACTTAATCAAATCA  |
| Apal | GGA-CCGGAGAAGA-  | AGAGCCAATAC  | TATA-AGCAGCCCTI  | -ACT-ATAACTTGATCATACCA  |
| EsLu | GGA-CCGGAAAAGG-  | GAGGCCCTGC   | -AA-AAGTATGCCCC  | -ACCCCA-ACCTAATCAAAACA  |
| Dape | GGA-CCAAGAAGA-   | GAGGCCCTGC   | TAAA-GCAGCCTC    | -ACCC-CTACTGTTCAAAACA   |
| Glse | GGA-CCGGGAAAAG-  | GGGGCCAATGC  | TCTA-AGCATGCCCTI | -GCC-CCACTGATCAAAACA    |
| Naar | GGA-CCGGGAAAAG-  | GAGGCCTATGC  | TCGA-GCAGCCTC    | -ACCCCA-ACCTGATCAAGACA  |
| Baoc | GGA-CCGGGAAGAA-  | GGGGCCAATGC  | TCA-AAGCATGCCTC  | -ACCCCT-ACCTGATCAAGACA  |
| Opso | GGA-CCGGGAAGAG-  | GGGGCCAATGC  | CCA-AAGCATGCCTC  | -ACCCCA-TCCTGATCAAAACA  |
| Alte | GGA-CCGGAAAAGG-  | AGGGCCAATGC  | TCCA-AGTACGCCCTI | -ACCCCG-ACCTGATCAAAACA  |
| Plap | GGA-CCGGAAAAGG-  | GGGGCCAATAC  | CC-CCGTACGCCCC   | -ACCCCGA-CTGATCAAGACA   |

Plal GGA-CCGGAGAGA- -GAGGCCATGCGCC-AGGCGACGCCCC-ACCCTCACCCTGCTGAAAGGC-A  
 Sami GGA-CCGGGGTAAA- -GAGGCCATGCG-TCGAGCGACGCCCC-ACC-CTCACCTGCTGCAAGGCA  
 Rere GGA-CCGGGAAGA- -GGGGCCATGCGT-CGAGCGACACCCCC-ACCCCC-ACCTGTTGCAATCA  
 Gama GGA-CCGAAAAGGC- -AGGGCCAAATGCGTC-TCGCGTAAAGCCCC-ACCCCCA-ACCTGATGCAAGGCA  
 Onmy GGA-CCGGAAAGA- -GGGGCCATGCGTTGA-GCGACGCCCC-ACCCCC-ACCTGATGCAAGGCA  
 Sasa GGA-CCGGAAAGA- -GGGGCCATGCGTTAA-GCGACGCCCC-ATCC-CCACCTGATGCAAGGCA  
 Cola GGA-CCGGAAAGA- -GGGGCCATGCGTTA-AGCGACGCCCC-ACCCCC-ACCTGATGCAAGGCA  
 Dita GGA-CCGGGGAGA- -AAGGCCATGCG-CCCCGGTACGCCTT-GCC-CCTGCTCAATGCAAGCCA  
 Gogr GGG-CCGGAAAGGA- -GAGGCCATGCGCCAT-CGCATGCCTT-CCCCC-AACTATGCAAAACA  
 Chsl GGG-CCGGAAAGT- -GAGGCCATGCGCCCC-GTATGCCTC-CTCCCCATCAGCTGCAAAACA  
 Atja GGA-CCGGGAAAA- -GGAGCCATGCG-TAAAAAGCAACTCC-TCC-CCTACCTAATGCAAAACA  
 lido GGA-CCGGGAAAA- -GGAGCCATGCGTAAA-AGCGACGCTCC-TCCCC-ACCTGATGCAAGACA  
 Auja GGA-CCGAGAAGA- -GGGGCCCGTGGTTA-TAGCAAGCCCC-ACCCCC-ACCTGAAACAACCA  
 Chag GGA-CCGAGAAGA- -AGGGCTATGCGCACC-GGCATGCCTT-ACCCCTACCCTGTAGCAAAACA  
 Hami GGA-CCGAAAAGG- -GGGGCCATATCTCA-GATACGCCCC-GCCCC-CATCTGAGCAACCCA  
 Saun GGA-CCGAAAAGA- -GGGGCCATGCGCCCA-GCGACGCCCC--ACCCCTATCTGAAACAACCA  
 Nema GGA-CCGAAAAGA- -GAAGCCATGCGCGAC-GCGACGCCTC-TCCCCAACCTAATGAAATAC-A  
 Disp GGA-CCGAAAAGAG- -GGAGCCTCTATCTAT-GATACGCCCC-ACCCCC-TACTAATGCAACACA  
 Myaf GGA-CCGAGAATA- -TGAAGCCCTCCAGAGGTATGCTTC-ACTCCC-CACTAATGCAATTCA  
 Lagu GGA-CCGAAAAGA- -GAGGCCATGCGCCC-AAAGCGACGCCTC-ATCCTC-ACCTAATGCAAGCCA  
 Trtr GGA-CCGAAAAGAT- -GGGGCTATGCGCTAA-GCGACGCCCC-CTCCCT-ACCCACTGCACTTA  
 Zucr GGA-CCGAGAAGAT- -GGGGTCCATGCGTATA-GTATACCTT-TTCCCC-ACCCACTGCACTTA  
 Pxja GGA-CCGAAAAGGA- -AGGGCCATACCTAA-GGTACGCCTT-ACCCTT-ACCTAATGCAAAACA  
 Pxlo GGA-CCGAAAAGA- -GGGCCATACCTAA--GTACGCCTA--CCTT-ACCTAATGCAAAACA  
 Pctr GGG-CCGAAGAGA- -GAGGCCATGCGCAAG-AGCGACGCCTC-CCC-CTTACCAGTCAAAACA  
 Apsa GGA-CCGAAAAGA- -GAGGCCATGCGTTA-ATGCGACGCCTC-ACC-CTTACCCTATGCAATTA  
 Cabe GGA-CCGGCAAAG- -GGGGTCAATGCGTGCT-AGTACACCCC-GCCCCA-AACTGCTGCACTACA  
 Bzze GGA-CCGAAAAGG- -GAGGCCATGCGCCAA-AGTAAAGCCTC-ACCCCC-ACCCCTGCAACGCA  
 Siim GGA-CCGAAGAAGA- -GGGGCCATAATTTA-GATACGCCCC-GCCCC-ACCTGCTGCTGCCCC  
 Ctru GGA-CCGAAAAGGA- -GAGGCCATACCAA-AGCGACGCCTC-CCCCTC-ACCTAGTCAAAATA  
 Dpbr GGA-CCGAAAAGGA- -GAGGCCATACCTAA-AAAGCATGCCTC-CCC-CTCACCTAGTCAAAATCA  
 Caki GGA-CCTGAAAAGA- -GGGGCCAAATACCTCA-TGCGACGCCCC-ACCCCCCAAAGCTGCAAGACCT  
 Phja GGA-TCTAAAAGA- -GAGGCCATACATTT-TGCGACGCCTC-TCCCC-AAAGCCCTGCAAAACC  
 Brsp GGA-ATGGGAAAA- -AAGGTCTATGTATAA-GACACACCTT-TACCCC-CAAGCTGCTGCAAAACC  
 Gamo GGA-CCGGAAAAAG- -GGGGCTATGCGCAA-AAAGCGACGCCCC-TCCCCT-AAAGCCCTGCAAAACC  
 Lolo GGA-CCGAAAAAAG- -GGGGCTATGCGCTAA-AGCGACGCCCC-TCCCCT-GAAGCCCTGCAACACC  
 Batr GGA-CCAAAAAAG- -AAGGCCATAAGATC-CTCACGCCTT--ACAATTAGTGTAGCTTCAA  
 Prmy GGA-CAAAGAAAA- -AAGGCCAAATGACTCC-ATTACGCCTT-ACCTTA-AGACACTAAATTAC  
 Loli GGA-CCGAAAAGA- -GAGGCCCTGTGTACC-AAAGCGACGCCCC--TCTCTAACCTGATGCAACCA  
 Loam GGA-CCGAAAAGA- -GAGGCCCTGTGTAAAT-ACAGCCCC--TCCCTCACCTAATGCAAAATCA  
 Chab GGA-CCGGGAAGA- -GGAGTCAATGTATTAT-AAAGACACCCC-ACCCTT-ACCTAATGCAAAACA  
 Chto GGA-CCGGGAAGA- -GGAGTCAATGTATTAT-AAAGACACCCC-ACCCTT-ACCTAATGCAAAACA  
 Majo GGA-CCGAAGAAA- -AGGGCCATGCGTTGA-AGCGACGCCTT-CCCTCC-ATCTAGTCAATACA  
 Hlst GGA-CCGAAAAAAG- -GGGGCCAAATGCGTAAA-AGCGACGCCTC-CTCCTC-AGTAAAGTCAATAACA  
 Clpe GGA-CCGAGAAGAG- -GGGGTCCATGTGCCA-TATACACCCC-GCC-CCCACCTAATGCAAAACA  
 Mlmr GGA-CCGAGAAGAG- -GGGGCCATGTGTAAA-AATACGCCCC-TCCCCCACCTAATGCAAGACA  
 Cr cr GGA-CCGAGAAGAA- -AAGGCCATGCGCAA--AATATGCCTT-ACCC-TTACCAGATGCAACTA  
 Muce GGA-CCGAGAAGAA- -AAGGCCATGCGC-AA-AATATGCCTT-ACCCTTA-CCTAATGCAACTA  
 Bege GGA-CCGAAGAAA- -GAGGCCATGCGTCTC-AGTACGCCTC-CTCCTT-ACCTAATGCAAGACA  
 Mela GGA-CCGAAGAAA- -GGGGCCTGTGTAAA-AGCGACGCCCC-CTCC-TTATCTAATGCAAAACA  
 Hats GGA-CCGAAGAGAG- -GAGGCCATGCGTCTA-AGTACGCCTC-ATCCC-CACCTAATGCAAGCCA  
 Or la GGA-CCGAAGAGG- -GGGGCCATGCGACC--ACTACGCCTC-AATCTC-ACCTAATGCAAGAAA

Cosa GGA-CCGAAGAAGA--AAGGCCTATGC-TTAAAACAAGCCTT-ACC-CTCACCTGATCAACCCC  
 Exsp GGA-CCGAAGAGAA--GAGGTCCATTC-TTTAGGAACACCTC-CCC-CTCACCTAATCAAAACA  
 Depa GGA-CCGAAGAAGA--AAGGCCTATAC-TTA-AAACAAGCCTT-ACCCTTACCCTAATCAATCCC  
 Rima GGA-CCAAAAGAAA--AAGGCCATCC-CCAG-AGAACAAGCCTT-ACCCTT-ACCTGATCAAAACA  
 Fuol GGA-CCGAAGAAAAG--GGGGCCAATGCTACA-AGAACAAGCCTT-ACCCTT-ATCTGCTCAAGGCA  
 Gmaf GGA-TCGAAGAAA--AAGGCCTATGCTTAACAACATGCCTT-ACCCCT--CTTATCAAAACA  
 Xeei GGA-CCGAAGAAA--AAGGCCAATGCT-TACAAATAAGCCTT-ATC-CCCATCTAATCAAAACA  
 Pros GGA-CCGAAGAGAA--AAGGCCCTGCTAAA-GGCATACCTT-TCCCC-ACCTAATCAAGGCA  
 Scmi GGA-CCGAAGAGAA--AAGGCCCTGCTAAA-GACAACCTT-CCCCC-GCCTAATCAATTCA  
 Rolo GGA-CCGAAAAGAA--GAGGCCAATGCTTGA-AGTATGCCTC-GCCCC-ACCTAGTCAAGACA  
 Cere GGA-CCGGAAAGAG--GGGGCCCTGCTTTA-AGTAAAGCCTC-ACCCCTA-CTAGTCAAAACA  
 Daga GGA-CCGAGAAGGA--GAGGCCAATGCTACG-GACAAGCCTC-ACCCACCCTAGATCAAGGCA  
 Anco GGA-CCGAAAAGAA--GAGGCCAATAC-TAAA-AGAACAAGCCTC-ACCC-CCACCTAATCAAAACA  
 Dmve GGA-CCGAAAAGAA--GGGGCCAATGCTTAA-AGAACAAGCCTC--ACCTCCCCCTAATCAGAACA  
 Dmar GGA-CCGAAAAGAA--GAGGCCAATGCTTGA-AGAACAAGCCTC-CCCTCC-CCCTGATCAAAACA  
 Anka GGA-CCGAAAAGAA--GAGGCCTATGCTCAA-AGAACAAGCCTC-ACCC-ACCTAATCAAGACA  
 Moja GGA-CCGAAAAGAA--GAGGCCAATAC-CAA-AGAACAAGCCTC-ACCCCA-CTAATCAATCA  
 Hoja GGA-CCGAAAAGAA--GAGGCCAATAC-CAA-AAACAAGCCTC-GCC-CCCACCTAATCAAAACA  
 Bede GGA-CCGAAAAGAA--AAGGCCAATGCTCAT-GACAAGCCTT-ACCC-ACCTAATCAAAACA  
 Bsp GGA-CCGGAAAGAA--AAGGCCAATGCT-TCGAGACAAGCCTT-ACC-CCCACCTAATCAAAACA  
 Mysp GGA-CCGAAAAGAA--GAGGCCTATGCT-TCACAACAAGCCTC-ACC-CTCACCTGATCAAAACA  
 Osja GGA-CCGAAAAGAA--GAGGCCTATGCTAAC-AGTATGCCTC-ACCC-TACTTGATCAAAACA  
 Sgro GGA-CCGAAAAGAG--AGGGCCAATGCTAAA-AGTATGCCTT-TCCCC-ACTTGATCAAAACA  
 Pzpa GGA-CCGAAAAGAA--AAGGCCAATGCTCCA-AGCATGCCTT--ACCCCTAACTACTCAATCA  
 Zeja GGG-CCGAGAAGAA--AAGGCCAATGCTTTC-AAATAAGCCTT-ACCTGT-AACTACTCAAAACA  
 Znne GGA-TCGAGAAGAA--AAGGCCAATGCTTCA-AGTAAAGCCTT-ACCCCT-AACTACTCAAAACA  
 Zefa GGA-CCGAGAAGAA--AAGGCCAATGCT-TAAAAATAAGCCTT-ACC-CCTAACTACTCAAGCCA  
 Acni GGA-CCGAGAAGAA--AAGGCCAATGCTTCCA-AGTATGCCTT-ACCC-AACTACTCAAAACA  
 Ncrh GGA-CCGAGAAGAA--AAGGCCAATGCTTCCA-AGTATGCCTT-ACCC-AACTACTCAAAACA  
 Agca GGA-CCGAAAAGAG--GGGGCCCTGCTT-AAGACAAGCCTC-TCCCC-ACCTGATCAAGACA  
 Hydy GGA-CCGAGAAGAG--GAGGCCTATAC-CCCT-GACAAGCCTC-CCCC-ACCTGATCAAGTTTA  
 Gsac GGA-CCGAGAAGAG--GAGGCCTATAC-CAC-TGATAAGCCTC-TCCCTT-ACCTGTCAATTTA  
 Pevo GGA-CCGAAAAGG--GGGGCCAATGCTAAA-AGTAAAGCCTC-CTCCCC-ACCTAATCAATCA  
 Hiku GGA-CCAAGAAGGA--TGGGCCATGT-TTTAAAACAAGCCTC-CTTTTT-AACTACTCAAGAAA  
 Inpa GGA-CCGAAAAGG--GGGGCCAATGCTACA-AGAACAAGCCTC-ACCC-AAATCTGATCAAAACA  
 Auch GGA-CCGGACGGG--AGAGCCAATCC-CACA-TACAAGCCTT-TTCA-CCACCTGATCAAGCCA  
 Fico GGA-CCGAGAAAGT--AAGGCCAATGCT-TTTCACAAGCCTT-TCC-CCCACCTAATCAAGGCA  
 Macs GGA-CCGAAAAGAA--GAGGCCTATGCTTCCA-GACAAGCCTC-TCC-CCCACCTAATCAAGACA  
 Moal GGA-CCAAAAAAC--AAGGTCCCTGCT-TAAACAAGCCTT-ATTCTA-CCCTAATCAACCCA  
 Syma GGA-CCGAAAAGG--AGGGCCAATAC-CTAA-AGAACAAGCCTT-ACCC-CCAACTACTCAAAACA  
 Mafr GGA-CCGAAAAGAA--GGGGCCAATGCTCAA-AGAACAAGCCTC-TCC-CCCACCTAATCAAAACA  
 Dcpe GGA-CCGTAAAGAA--GAGGCCAATAC-CC-CCACAAGCCTC-CCCCTT-AGTTAATCATGTAA  
 Dcti GGA-CCGTAAAGAA--GAGGCCAATGCTCTCC-GACAAGCCTC-CCCCTT-AACTAATCATATAA  
 Hehi GGA-CCGAAAAGAA--GAGGCCAATGCTTCT-AAACAAGCCTC-ACCC-ACCTAATCAAGACA  
 Stam GGA-CCGAAAAGAA--GAGGCCAATAC-CTCA-GACAAGCCTC--ACCCACCTAATCAAGACA  
 Hogi GGA-CCGAAAAGAG--GGGGCCAATGCTTAA-AGTAAAGCCTC-ACCCCT-ACTTAATCAAAACA  
 Erzo GGA-CCGAAAAGGA--GGGGCCTATAC-TGC-AAATAAGCCTC-ACCCTC-ACCTAATCAATCA  
 Hxot GGA-CCGAAAAGAA--GAGGCCTATGCTCAC-AGAACAAGCCTC-CCCCCT-ACCTAATCAAGTCA  
 Core GGA-CCGAAAAGAA--GAGGCCAATGCTTAGA-GACAAGCCTC-CCCCTC-ACCTAGTCAAGACA  
 Apve GGA-CCGAAAAGAA--GAGGCCCTGCTCAA-GATAAGCCTC--CCCCCTACCTAATCAAAACA  
 Latj GGA-CCGAAAAGAA--AAGGCCAATGCTCACA-AGTATGCCTT-ATCCCA-CCCAATCAAAACA  
 Laja GGA-CCGAGAAGAA--GAGGCCAATGCTTAA-AGTAAAGCCTC--CCCCGACCTGATCAAGACA

Syja GGA-CCGAGAAGA- -GGAGCCATATTTTA-ACACGCCCC- ACTCCT-ACCCAATCAAAACA  
 Epme GGA-CCGAAAAGAG- -GGGGCCATGTCCAA-ATATGCCTC- ACCCCC-ACCTGATCA AAGCA  
 Grse GGA-CCGAAAAGAA- -GAGGCCAATGCTCCA-AGCACGCCTT- ACCC-CCACCTAATCAAAACA  
 Clja GGA-TCGAAAAGAG- -GAGACTCTACTCTA-AGTACGTCTC- ACCCTT-ACTGGGTCAAAACA  
 Ogcy GGA-CCGAAAAGG- -GAGGCCATAC TAAATA GCA GCCCC- CCCCC-ATCTGATCAATA-G  
 Plna GGA-CCGAAAAAA- -GGGGCCATGCT- TCAA GTACGCCTC- AGC-CTCACCTAATCAAAACA  
 Lema GGA-CCGAAAAAA- -GAGGCCATAC TCCT-AGTATGCCTC- ACCCCC-ACCTAATCAAAACA  
 Etzo GGA-CCGAGAAGA- -GAGGCCATGCTCCTA-AGCACGCCTC- ACCCCC-ACCTACTCAAAACA  
 Apse GGA-CCGAAAAAA- -GAGGTCCA TGT TAA-AA GCACACCTC- CCCCTC-ACCTAATCA CACCA  
 Epde GGA-CCGAAAAGAA- -GAGGCCATGCTTAA-GTATGCCTC- -ACCCCCACCTAATCAAGACA  
 Slja GGA-CCGAAAAGGA- -GAGGCCATGCTCAA-AA GCACACCTC- ACCCCCA-ACCTAATCAATACT  
 Bsja GGA-CCGAAAAGG- -GGAGCCCTAT- TCAA ACACGCCCC- CCC-CCCACCTAATCA AATCA  
 Ecna GGA-CCGAAAAGAA- -GAGGCCAATGCTCA-A-AGCATGCCTC- CCCCTT-ACCTAATCAAAACA  
 Cohi GGA-CCGAAAAGAA- -GAGGCCATAC TTCA-AGTACGCCTT- ATCC-CAATCTAATCAAAACA  
 Caar GGA-CCGAAAAGAA- -GAGGCCATAC CTT-AGGCACGCCTC- CCC-CTTACCTAATCA AACCA  
 Came GGA-CCGAAAAGAA- -GAGGCCATAC CCCA-GGCACGCCTC- -ACCCTTACCTAATCA AATCA  
 Mema GGA-CCGAAAAGAA- -GAGGCCATGCTCAA-AGCACGCCTC- ACCC-TCACCTAATCA AAGCA  
 Lenu GGA-CCGAAGCGAG- -GAGGCCATGCTCA-AAGCTAAGCCTC- ATC-CTCTTCTTATCA AACCA  
 Brja GGA-CCGGAAAGAA- -GAGGCCATGCTTGA-AGCACGCCTC- CCC-CTT-CTAATCAAAACA  
 Plma GGA-CCGGGAAAGA-AGAGGCCAATAC TCTA-GGCACGCCTC- -ACCCT-CTAATCAAAACA  
 Emst GGA-CCGAAAAGAA- -GAGGCCATGCTCAA-GTACGCCTC- ACCCCC-ACCTAATCAAGACA  
 Ptti GGA-CCGAAAAGAA- -GAGGCCCTACT- TTCAA GTACGCCTC- ACC-CCCACCTAATCA AAACA  
 Losu GGA-CCATGAAGAA- -AAGGCCAATTC TTAAGTACGCCTC- ACC-CTTACTTATCAAAACA  
 Geoy GGA-CCGAGAGGG- -GAGGTCTATAC TTG-AA GCACACCTC- ACCCC- TACTGCTCAAGTCA  
 Dipi GGA-CCGAAAAGAA- -GGGGCCCTGCTCA-AA GTACGCCTC- TCCCT- TACTAATCAAAACA  
 Pama GGA-CCGAAAAGGA- -AAGGCCCTGCTCAA-GGCACGCCTT- GCCCTCA-CTGCTCAAGACA  
 Leob GGA-CCGAAAAGGA- -AAGGCCCTACT- TTAAGTACGCCTT- ACC-CTTACTTATCA CACCA  
 Neba GGA-CCGAAATAA- -GGGGCCATGCTTT-AA GTATGCCCC- TCCCTA-AA TCAATCA AATTA  
 Pdpi GGA-CCGAAAAGT- -GGGGCCCTACTTACAAA GCACGCCCC- CCTCCA-ACCTAATCA AACCA  
 Nimi GGA-CCGAAAAGAA- -AGGGCCATACTTTTA-AGCACGCCTT- ACCC- TTACTGATCA AAGCA  
 Uptr GGA-CCGAAAAGAA- -GAGGCCAATGCTCAA-AGTACGCCTC- CCCCTA-ATTTATCAAAACA  
 Pesc GGA-CCGAAAAGAT- -AGAGCCATGT TCTT-AGTACCTCT- AATCTT-ACCTGATCAAAACA  
 Baar GGA-CCAAGAAGA- -GAGGCCATACTTAA-AGCACGCCTC TACCCCTCACCTAATCA AAACA  
 Moar GGA-CCGAAAAGAA- -GAGGCCATACTCCTA-AGTACGCCTC- ACCCCC-ACCTACTCA AATCA  
 Toja GGA-CCGAAAAGAA- -GAGGCCATGCTCCA-AGCACGCCTC- ACCCTC-ACCTAACA AAGCA  
 Chau GGA-CCGGAAAGAG- -GGGGCCCTACTCCCT-GGCACGCCCC- TCCCTC-ACCTTATCA GACCA  
 Chse GGA-CCGAGAAGT- -GAGGCCATGCTTTCA-AGCACACCTC- CCCCTT-ACCTAATCA TATCA  
 Enar GGA-CCGAAGAGAA- -GAGGCCAATTC TCCA-AGAACGCCTC- ACCCCT-ACCTAATCA AAACA  
 Hpty GGA-CCGAGAAGAA- -GAGGCCATGCTTAA-AGTACGCCTC- CCCCTC-ACCTAATCAAGACA  
 Nana GGA-CCGAAAAGAT- -GGGGCCATGCTCAA-GTATGCCTC- CCCCTA-ACCTGATCAAAACA  
 Mcst GGA-CCGAAAAGAA- -GAGGCCATACTCAA-AGTACGCCTC- ACCCCC-ACCTAATCAAAAA  
 Rhox GGA-CCGAGAAGAA- -GAGGCCATGCT- CAAA GTATGCCTC- CCC-CTAACCTAATCAAGACA  
 Opfa GGA-CCGAAAAGAA- -GAGGCCATAT CCAA-GATACGCCTC- ACCCCT-ACCTAATCAAAACA  
 Paar GGA-CCGAAGAGAA- -GAGGCCATACTT-AA GTACGCCTC- CCCCTC-ACTTATCA AACCA  
 Gozo GGA-CCGGAAAGAG- -GGGGCCATGCTTTTA-AGCACGCCTC- ACCCTC-ACCTACTCA AAGCA  
 Ackr GGA-CCGAAAAGAC- -GGGGCCCTGCTCATA-GCATGCCCC- CCCCTT-ACCTAATCA AAGCA  
 Elev GGA-CCGAAAAGAA- -GAGGCCATACTTAA-AA GTACGCCTC- ACCCA-CACCTAATCA AAATA  
 Trdu GGA-CCGAAAAGAA- -GAGGCCCTGT TC-CAA ATATGCCTC- CCCCTC-ATCTATCA AATCA  
 Amoc GGA-CCGAAAAGAA- -GAGGCCAATACTTAA-AGCACGCCTC- CCCCCG-ACCTGATCAAAACA  
 Hame GGA-CCGAAAAGAA- -GAGGCCAATGT T-AAAA ATACACCTC- ACC-CTTACTAGTCA AATCA  
 Chso GGA-CCGAAAAAA- -GAGGCCATGCTT-AAAA GATGCCTT- CCCCTCAT-CTAATCA AAGCA  
 Lyto GGA-CCGAAAAGAA- -GAGGCCATGCTT-AAGGTACGCCTC- CCCCTT-ACCTACTCAAGACA

Encr GGA-CCGAGAAGAA--GAGGCCAATGCTCC-AGGCACGCCTC-CCC-CTTACCTAAGTCAAAACA  
 Bvar GGA-CCGAAAAGAA--GAAGTCAATATTT-TAAACACACTTC-ACCCCT-ACCCAATCAAGACA  
 Noco GGA-CCGAAAAAAG- -GGGGTCACTACTA-TGTACACCCCT-ACCCCT-ACCTAATCAAAACA  
 Chsp GGA-CCAAGGATAA--GAAGGCCAATGCTTAC-AGTACGCCCC-CTCCTC-A-CTATTCTATATA  
 Arja GGA-CCGAAAAGAA--GAGGCCCTGCT-CTAAGGCACGCCTC-CCC-CCTACCTGTCTCAAGTCA  
 Pase GGA-TCCGAGAAGG--AAGGCCCTGCTTACA-CCCATGCCCT-ATCCTC-ATCTGCTCCGTTTC  
 Trel GGA-CCGGGACAGC--AGGGCCAAATGTTTC-TCAACCATGCCCC-CTCCTCA-CACACTGCCACT  
 Lifa GGA-CCGAAAAGAA--GAAGGCCACTCA--AAGAGAGCTTC-ACC-CCCACCTGCTCAATCA  
 Acur GGA-CCGAAAAGGA--AAGGTCCAATACTTTT-GGTACACCTC-CCCCTC-ACCTTGATCAAAA-A  
 Ampe GGA-CCGGAAAAGAA--GAAGGCCAATGCTATA-AGTATGCTTC-ACCCTC-ACCTAATCTAGATA  
 Urja GGA-CCGAAAAAAC- -GAGGCCCTGCTCAA-AACACGCCCC-CCCCTT-A-ITTAATCAAGCCA  
 Enet GGA-CCGAAAAAG- -GGGGCCAAATGTTCTCAAGGCACGCCCC-ATCCCT-ACCTGCTCACCCC  
 Ptbr GGA-TCCGAAAAGAA--AAGGCCATAATGATACC-TTCAAGCCTT-ATACTTAC-CTAATCAACCCA  
 Safa GGA-CCGAAAAGAA--GAGGCCCTGCTCA-AAGGCACGCCTC-CCCACCCACCTAATCAATCA  
 Icae GGA-CCGAGAAGAA--GAGGCCAATGCTCAA-GGCACGCCTC-TCCCCT--CTAATCAAAACA  
 Asmi GGA-ATGGAAAAGCA--GTGGCCCTGCTTCCA-AGGCACGCCAC-CCTTTT-ACCCAATCAAAACA  
 Foal GGA-CCGAAAAGGC--AAGGCCAATTCCTTT-AGTATGCCTC-CCCCCTTACCTGTCTCAATATA  
 Drze GGA-CCGAAAAGAA--GGGGTCCAATGCTAAT-AGTACACCC-ACCCAT-AACTGTCTCAAGAA  
 Rhas GGA-CCGAAAAGAA--GAGGCCCTGCTTAAA-AGCAAGCC-CTCCTG-ACCTGATCAAGTCA  
 Elac GGA-CCGAAGAGAA--GAGGCCCTGCT-CAA-AGCAAGCCTC-ACCCCA-ACCTTAGCAAAACA  
 Kugu GGA-CCGAAAAGAA--GAGGCCAATACATAAA-AGGCACGCCTT-CCCCCT-ACCTAATCAAAACA  
 Plor GGA-CCGAAAAGAA--GAGGCCAATGCTTCCC-AGTATGCCTC-ACCC-ACCTGATCAAAACA  
 Sgun GGA-CCGAAAAGAA--GAGGCCAATAC-ATCGGCACGCCTC-ACCCT-CACCTAATCAAACCA  
 Zaco GGA-CCGAAAAGAA--GAGGTCCAATACATAAA-AGTACACCTC-ACC-TTTACCTGCTCAAAACA  
 Zbfl GGA-CCGAAAAGAA--GAGGTCCAATGCTCTAA-AGGCACACTC-ACCC-ACCTAATCAAAACA  
 Spba GGA-CCGAAAAGGA--GGGGCCAAATGCTTAA-AGGCACGCC-ACCCTT-ACCCAATCAAGCA  
 Game GGA-CCGAAAAGAA--GAGGCCATAATGCTCAA-AGGCACGCCTC-ACCCCT--CTAATCAAAACA  
 Thth GGA-CCGAAAAGAA--GAGGCCAATGCTATA-AAAAGCAGCCTC-ACCCCT--CTAATCAAAACA  
 Xigl GGA-CCGAAAAGAA--GAGGCCAATGCTTGA-AGTACGCCTC--ACCC-ACCTAATCAAGCA  
 Hyja GGA-CCAAAAGAA--GAGGCCAATGCTCAA-AGGCACGCCTC-ACTC-CT-CTAATCAAAACA  
 Psan GGA-CCAAAAGAA--GAGGCCATAATCCAA-AGGCACGCCTC-ACTCCT--CTAATCAATCA  
 Cupa GGA-CCGAAAAGAA--GAGGCCAATACCTT-AAAAGCAGCCTC-A-CCCC-TCCTAATCAAAACA  
 Mpch GGA-CCGAAAAGAA--GGGGCCAAATACGTAA-AGGCACGCC-ACCCCT-ACCTAATCAAGACA  
 Char GGA-CCGAAAAAAG- -GAGGCCAATGCTATA-AGTATGCCTC-CCCC-TCACCTAATCAATCA  
 Pser GGA-CCGAAAAGAA--GAGGCCAATGCT-TTAAAAGTACGCC-ACC-TCTACCTAATCAAAACA  
 Prol GGA-CCGAAAAGAA--GGGGCCAAATGCTTCTT-AGTACGCCTC-ACCC-ACCTAATCAAAAA  
 Plbi GGA-CCGAAAAGAA--GGGGCCAAATGCTTAAA-AGTACGCCTC-ACCC-ACCTAATCAAAAA  
 Calu GGA-CCGAAGAAAG- -AGGGCCAAATGCTTCCCAATGACGCCCT-ACC-CCCACCTGATCAAAACA  
 Papa GGA-CCAAAAGAGAA--GAGGCCAATTTTACACA-GATACGCCTC-ACCCT-AAITTTGCTAATTAA  
 Suf r GGA-CCAAAAGAA--GAGGCCCTGTTTAAA-AACACGCCTT-ACCTCG-ACTCATTCACCCA  
 Stci GGA-CCAAAAGAAAT--GAAGCTCTGTTATT-AATAAGCCTC-ACTCCC-ACTTACTCACACCT  
 Taru GGA-CCGAAAAGAA--GGGGCCAAATGTT-ACA-AACAAGCC-ACTC-TCACCTGCTCAATCCA  
 Rala GGA-CCGAAAAGAA--GAGGCCAATGCTTTC-AAATGACGCCTC-CCC-CCCACCTAATCAAAACA

\*\*

\*

|      | 57'                                                      |  | 58                                | 58' |
|------|----------------------------------------------------------|--|-----------------------------------|-----|
| Scca | -AC <b>TAAAA</b> TAGATAA-----GAAAAGATTATCTA-----TT-      |  | <b>GCC</b> CAAGAAA-AG <b>GGT</b>  |     |
| Muma | -AC <b>TAAAA</b> TAGATAAG----AAAAGATC----A--CC-----CACT  |  | <b>GCC</b> CAAAAAC-AG <b>GGT</b>  |     |
| Erca | -AA <b>TCAAA</b> CAGATAAT----AAAGA-ACATATTTT-----A       |  | <b>ATC</b> CAAGAAA-AG <b>GAC</b>  |     |
| Pose | -GA <b>TCAAA</b> CAGATAAT----AAAGAACATATCCC-CA-----      |  | <b>CCC</b> TAGAACA-GG <b>GTT</b>  |     |
| Actr | -AC <b>TAAAA</b> TAGGTAAG----GGGGCACAACCTCC-----         |  | <b>CCC</b> CTAGA-A-TA <b>GGG</b>  |     |
| Scal | -AC <b>TAAAA</b> TAGGTAAG----AGGGGCACAAATCC-----TCC-     |  | <b>CCC</b> CTAGAAT-AG <b>GGC</b>  |     |
| Posp | -AC <b>TAAAA</b> TAGGTAAG----GGGG-CACAAACCTT-TC-----     |  | <b>CCC</b> TAAAACA--G <b>GGC</b>  |     |
| Atsp | -AC <b>TAAAA</b> TGGAAAAG----AGGACATAACACCACA-----       |  | <b>GCC</b> CCAAAAA-AG <b>GGC</b>  |     |
| Leoc | -AC <b>TAAAA</b> TGAAAAG----AGGACATA--TCAT-----TAAT      |  | <b>ACC</b> CCAAAAA-AG <b>GGT</b>  |     |
| Amca | -AC <b>TAAAA</b> TAGGAAAA----AGGACACACCACCC-TT-----      |  | <b>ATC</b> CAAAAACA-AG <b>GAT</b> |     |
| Osbi | -AC <b>TAAAA</b> TAAATAAG----GAAA-GCACCTACTAA-----       |  | <b>CCC</b> AGAGACA-AT <b>GGT</b>  |     |
| Pabu | -AC <b>TAAAA</b> CAA-TAAA----GGGGCATAACAAG-----CTC       |  | <b>GCT</b> AAAAATA-AC <b>AGC</b>  |     |
| Hial | -AC <b>TAAAA</b> CAGA-AAG----GGGAACAATAAA-----GCA-       |  | <b>GCC</b> CAAGATA-AT <b>GGC</b>  |     |
| Elha | -AC <b>TAAAA</b> AGGAAAAG----GGG--GTACAACGAA-----CACA    |  | <b>GCC</b> AAAGACA-AT <b>GGC</b>  |     |
| Mlcy | -AC <b>TAAAA</b> CGGAAAAG----GGGGCACAACCCACACC-----ACAA  |  | <b>GCC</b> ACAGATA-AT <b>GGC</b>  |     |
| Algl | -AA <b>TAAAG</b> TAGGAAAG----GAAGCACAATTG-TA-----A       |  | <b>GCC</b> AGAGA-T-TA <b>TGG</b>  |     |
| Ptgi | -AA <b>TAAAA</b> CAGAGAAG----GGAGT-ACAATTAAGC-----A      |  | <b>ACC</b> GAAGATA-AC <b>GGC</b>  |     |
| Alaf | -AA <b>TAAAA</b> CAGGAAAC----GGGGTCCAACACA-----AACAA     |  | <b>AAC</b> GGAAATA-AC <b>GAA</b>  |     |
| Nock | -AA <b>TAAAA</b> CAGATAAC----GGGACGCAACAA-----ATA        |  | <b>ATC</b> GAAAATA-AC <b>GAA</b>  |     |
| Anja | -AA <b>TAAAA</b> CAGACAAA----GAG-GT--ATATTAACC-----T     |  | <b>ACC</b> AAAGATA-AT <b>GGT</b>  |     |
| Gyki | -TA <b>TAAAG</b> CAGATAAT----GGGAAGACACA-----ACT         |  | <b>GCC</b> AGAGATA-AT <b>GGC</b>  |     |
| Syka | -AA <b>TAAAA</b> TAGATAAAA----GAGGTATACT-----TA-----ATCG |  | <b>ACC</b> AAAAATA-AT <b>GGT</b>  |     |
| Opma | -AA <b>TAAAA</b> AGGATAA----TGAGATAAACACTA-----CTT-      |  | <b>ACC</b> AAAGATA-AT <b>GGT</b>  |     |
| Comy | -AA <b>TAAAG</b> AAG-TAAG----GGTGAACA--TCCA-TT-----A--   |  | <b>GCC</b> AAAGATT-AT <b>GGC</b>  |     |
| Sasp | -AA <b>TAAAA</b> TAGGCATT----GGA---CACCCACACA-----A      |  | <b>CCA</b> AAGAATT-TT <b>GGC</b>  |     |
| Eupe | -AA <b>AGAAA</b> CAGATAAT----TAG--ACACCTA-----CACA       |  | <b>GCC</b> ATAGATA-AT <b>GGT</b>  |     |
| Enja | -AC <b>TAAAG</b> CAGGTAAG----GATAA-GCAATCCA-AC-----G     |  | <b>GCT</b> CAAGAAA-AG <b>AGC</b>  |     |
| Same | -AC <b>TGAAG</b> CATGTAAG----GGGGGGCACCCC-----TCA-       |  | <b>GCC</b> CGAGAAA-AT <b>GGT</b>  |     |
| Chch | -AC <b>TAAAG</b> CAGGCAAA----AAAGCTCAC---AA-CT-----CCCA  |  | <b>GCC</b> AAAGACA-AA <b>GGC</b>  |     |
| Grgr | -AC <b>TAAAC</b> CGGACAAG----GGGGAGCAAA-ACT-----CT       |  | <b>GCC</b> CTAGATATAG <b>GGC</b>  |     |
| Caau | -AA <b>TAAAT</b> AAAATAAAGGGAGGGCCAAAACCCCA-GC-----T     |  | <b>GGC</b> CGAAATA-AG <b>GAC</b>  |     |
| Cyca | -AA <b>TAAAT</b> AAAGTAAA----GGGAGAGCCAAAATCCC-----AGCT  |  | <b>GGC</b> CAAAAATA-AG <b>GAT</b> |     |
| Dare | -GA <b>TAAAA</b> AAAATAAAA----AGGAGAGCTAAAAC-----CTCT    |  | <b>TCC</b> CGAAATA-AG <b>GGT</b>  |     |
| Cost | -AC <b>TAAAT</b> TAGATAAAA----TGGAGGACCTACAATTT-----A    |  | <b>GGC</b> AAAAATA-AA <b>GGC</b>  |     |
| Leec | -AC <b>TAAAT</b> TAAAGTAAA----GGGGGGCCAAA-----C-----ACG  |  | <b>TGC</b> CAAAAATA-AG <b>GGC</b> |     |
| CrIa | -AC <b>TAAAT</b> TAAAGCAAA----GGT-AGAACCCCT-----CTAC     |  | <b>TGC</b> CAAAAATA-AG <b>GGC</b> |     |
| Clmc | -AC <b>TCAAC</b> CAACAAA----AGAAAAGCACCAAA-----CCC       |  | <b>ACC</b> CAAGATA-AG <b>GGG</b>  |     |
| Phin | -AC <b>TCAAT</b> TAAACAAA----AGAAGG--GCATAAA-TA-----AG   |  | <b>CCC</b> CGAGATA-AG <b>AAA</b>  |     |
| Icpu | -AC <b>TAAAT</b> TAAACAAA----GGGGGGCACAAT-C-----CCA      |  | <b>CAT</b> CAAGATA-AG <b>ATT</b>  |     |
| Psto | -AC <b>TAAAT</b> TAAATAAT----GAGAGGGCATAACC-----CTAA     |  | <b>AAT</b> CAAGATA-AG <b>ATT</b>  |     |
| Cora | -AC <b>TAAAA</b> TAGATAAAA----GGAAAGCATAAATA-----ACA     |  | <b>AAT</b> TTAGATA-AA <b>ATT</b>  |     |
| Eisp | -AC <b>TAAAT</b> TAAATAAG----GGCGG-AC-CCAATAGC-----C     |  | <b>TCT</b> CTAGATA-AG <b>TGC</b>  |     |
| Apal | -AA <b>TCAAT</b> CAACAAA----ATTA-AACACTCTAC-----C        |  | <b>CCC</b> CAAAAAGA-AG <b>GGG</b> |     |
| EsLu | -AC <b>TAAAA</b> TAGACAAG----GG--GGCACGCCAC-----AACT     |  | <b>GCC</b> GAAAAGA-AC <b>CGC</b>  |     |
| Dape | -AC <b>TAAAA</b> CAGGTAAG----GGGGCACATCCCT-----GT--      |  | <b>GCC</b> GAAAATT-AC <b>TGC</b>  |     |
| Glse | -AC <b>TAAAA</b> CAGAAAAG----GGGGTACACCCCAAAA-----       |  | <b>GCC</b> CAAGAGA-AC <b>GGC</b>  |     |
| Naar | -AC <b>TAAAA</b> CAGATGAG----GGGGCACACCCAA-----ATGA      |  | <b>GCC</b> CAAGAGA-AT <b>GGC</b>  |     |
| Baoc | -AC <b>TAAAA</b> CAGAAAAA----GGG--GCACACCCAC-----TCGA    |  | <b>GCC</b> CGAGAGA-AC <b>GGC</b>  |     |
| Opso | -AC <b>TAAAA</b> CAGAAAAG----GGAAC-ACATCCCAGTG-----A     |  | <b>GCC</b> CGAGAGA-AT <b>GGC</b>  |     |
| Alte | -AC <b>TAAAC</b> CAGACAAG----GGGGCGCAATCCT-----TCA       |  | <b>GCC</b> CTAGATA-AG <b>GGC</b>  |     |
| Plap | -AC <b>TAAAC</b> CAGACAAA----GGG---GCGCAATCCTC-----A     |  | <b>GCC</b> CTAGACA-AG <b>GGC</b>  |     |



Plal -AC**TAAAA**CAGACAAG----AGGGC-ATACTCAGGTG-----T**GTC**AGAGAGC-AT**GAC**  
 Sami -AC**TAAAA**CAGACAAG----AGGGC**CATAC**-CCAG-GT-----G--T**GCC**AAAGAGT-AT**GGC**  
 Rere -AC**TAAAA**CAAGTAAG----GGGG**CATACCC**CAGC-----TC**GCC**TCAGAGA-TT**GGC**  
 Gama -AC**TAAAT**TAGACAAG----GGGGC-ACACCCTTG-C-----G**ACC**CGAGATA-AT**GGC**  
 Onmy -AC**TAAAA**CAGACAAG----GGGGC**CACCA**AG-----AT-T**GCC**TAAAAGA-AC**GGC**  
 Sasa -AC**TAAAA**CAGAAAAG----GGGGC**CACCA**AGATT-----**GCC**CAAAAAG-AC**GGC**  
 Cola -AC**TAAAA**CAGGCAAG----GGG--GCAC**ACCA**AG-----GTGT**GCC**TGAGATA-AC**GGC**  
 Dita -AC**TAAAA**TGGAAAAA----GGGGGG**CAAGCC**CG-GA-----GGC**GCC**CTAGAGA-AG**GGC**  
 Gogr -AC**TAAAA**TAGAAAAG----GGGT**ACCC**CAA-C-----AA**GCC**CTAGATA-AT**GGC**  
 Chsl -AC**TAAAA**CAG--AGA----GGAGC-CC-CACGGC-T-----A**GTC**TAAGAAA-AT**GAC**  
 Atja -AC**TAAAT**TAGACAAG----GGGGT**ACAACC**CT---T-----T**GCC**TAAGACA-AA**GGC**  
 lido -AC**TAAAT**TAGACAAG----GGGGT**ACAACC**CTTT-----T**GCC**TAAGATA-AA**GGC**  
 Auja -AC**TAAAA**CAAGCAAG----AGGGC**ACGCC**CTTTTG-----GCTT**GTC**AAAGAGA-AT**GAC**  
 Chag -AC**TAAAA**CAAGCAAG----AGGG**CAAGCC**CCG-----CTAT**GTT**AAAAATC-AT**AAC**  
 Hami -AC**TAAAG**CAAAAAC----AGGTC**ATACCC**GAA-----CTT**GTT**TGAGAAA-AC**AAC**  
 Saun -AC**TAAAA**CAAGAAAA----AGG-AC--AT**ACCC**GACA-----CTT**GTT**CAAGATA-AC**AAC**  
 Nema -AA**TAAAA**TAGGAAAG----GGGGC-ATATCCTTCTT-----**GCC**CTAGAGA-AG**GGC**  
 Disp -AA**TAAAA**TAGAAAG-----GGG**ACAAG**ATCC-----TGAA**ACC**CAAGAGC-AG**GGT**  
 Myaf -AA**TAAAA**TAGAAAG----AAG--CAAATC-----CCAA**GCC**CAAGAAT-AG**AGC**  
 Lagu -AC**TAAAG**CAGACAAG----AGGAC**ATAAG**AGGC-----AT**GCC**AAAGAGC-AT**GGT**  
 Trtr -AC**TAAAG**AGGATTAA----GGGGT**ACG**-CC**CAT**-----GC--**GCC**AAAGAGC-AT**GGC**  
 Zucr -GC**TAAAG**AGGCCTAA----GGGGGGT**GCC**CA-----TGC**GCC**AGAAAGC-AT**GGC**  
 Pxja -AC**TAAAA**TAGGTAAA----AGGGC**ATAACC**CT-----TTA-**GCC**ACAGAAA-AT**GGC**  
 Pxlo -AC**TAAAA**TAGGTAAA----AGGGC-AAA**ACCC**-TA-----A**GCC**ACAGAAA-AT**GGC**  
 Pctr -AC**TAAAG**TGGACAAA----AGGG-CAT**GCCC**CAG-TT-----GG--**GCC**AAAGATA-AT**GGC**  
 Apsa -AC**TAAAT**AGGGCAAAA----AGGGC**ATG**-CC**C**-TC-----CG-G**GCC**AAAATTA-AT**GGC**  
 Cabe -AC**TAAAG**TGAGTAAT----GGGGC**AGC**-CC-C-----GTTA**GCC**GAAGAAT-AC**GGC**  
 Bzze -AC**TCAAG**AGGACAAG----GGGGC**ATA**-CT-A-----TAGT**GCC**CCAGAGA-AT**GGC**  
 Siim -AA**TCAAG**CAGCTAAC----GGGA**ACTA**-TC**AC**-----CGCA**AGT**AGAGAGA-AT**ACT**  
 Ctru -AC**TAAAA**TAGGCAAG----AGGGC**CAGCC**CC-----CCT**GCC**TAAGAAA-AT**GGC**  
 Dpbr -AC**TAAAA**TAGGCAAG----AGGGC**CAGCC**-----CC-----CCT-**GCC**TAAGAAA-AT**GGC**  
 Caki -TA**TAAAA**CGGATGA-----GAGC**ACTTA**ATA-----ATTA**AAC**GAAGATT-AC**GGA**  
 Phja -AA**TAAAG**TGGGCAAAA----GAGGCTT**AAAA**-T-----TC**GCC**CCCGAGA-AG**GCT**  
 Brsp -AA**TAAAA**AGGATAAG---GGA-AC--ATGTT**AAAT**T-----TAC**CTA**GAAGGTA-GC**AGA**  
 GamO -AA**TAAAG**CGGATAAG----GGG--GCTT**AAAA**-----GAC**CCC**AAAAAGA-AT**GGG**  
 Lolo -AA**TAAAG**CGGACAA-----GGGGGCTT**AAAA**AGA-----C**CCC**AAAAAGA-AT**GGG**  
 Batr -AC**TGCAC**ACAACAAT---AAA-ACTA**ATAG**TAA**ACC**-----ACT**CGT**TCAGACA-AC**TC**  
 Prmy -CC**TAAAA**TGTTACA----AGGA-AT**ATTC**-----CC**TCA**TTTAAAG-AC**CC**  
 Loli -AC**TTAAT**CTGATAAT---AGA-GC--ACA--**ACT**-----TCC**CCA**AAAGAGA-AT**TGG**  
 Loam -AC**TAAAT**TAGACAAG----AGGAC-AT**ACCT**GT**CC**-----A**GCC**AAAGAAA-AT**GGC**  
 Chab -AC**TAAAA**TAGGCAAAA----AGGGC**ATTAC**CC-----CC**GCC**TGAAATA-AC**GGC**  
 Chto -AC**TAAAG**TAGGCAAAA----AGGGC**ATTG**C**ACC**-----CC**GCC**TGAAATA-AC**GGC**  
 Majo -AC**TAAAC**TAGACAA-----GGAGG**CATC**CC-----GCAT**GCC**TTAGATATA**GGC**  
 Hlst -AC**TCAAC**TTAATAAG---AGGAC**AT**-CCTT**AT**-A-----T**GCC**TAAAAAC-AA**GGC**  
 Clpe -AC**TAAAA**TAGGCAAG---AGGG-CAT**ACCT**GT**C**-AC-----**CCC**ATAAATA-AT**GGC**  
 MImr -AC**TAAAA**TAGGCAAT---AGGAC**ATACC**CT**AT**-----TTAC**GCC**TGAGATA-AC**GGC**  
 CrCr -AC**TAAAA**TAGGCAAAA----AGGGCGT**CCC**CT**AT**-----**GCT**ACAGATA-AT**AGC**  
 Muce -AC**TAAAA**TAGGCAAAA----AGGGC-GT**CCCC**AA-----T**GCT**ACAGATA-AT**AGC**  
 Bege -AC**TAAAA**TAGGCAAAA----AGGGC**ATGCC**CC**CC**-----A**GCC**TGAGATA-AC**GGC**  
 Mela -AC**TAAAT**TAAGACAAA----AGGAC**GTACC**CC**CC**-----C**GTC**TAAGAAA-AT**GAC**  
 Hats -AC**TAAAC**TAGGCAAG---AGGAC**ATA**-CCT**C**-----TTAT**GCC**TTAGATA-AT**GGC**  
 Orla -AC**TAAAT**TAAGACAAG---AGA**ATAT**ATCT-----TGA**GTC**ATAGAAA-AT**GAC**

Cosa -AC**TAAAGCAG**GCAAA----AGAACATAA-TACC-TT-----A**TTC**GAATAAA-AT**GAT**  
Exsp -AC**TAAAA**TAGGCAAA----AGGACATATC-CTT-AA-----**GCC**GTAAAGA-AC**GGC**  
Depa -AC**TCAAT**TAGGTAAG----AGAGG-ACATCATC-----CT**TCC**AAAGATA-AT**GGC**  
Rima -AC**TAAAA**CAGATAAA----AGAGCACAAC-TTT-----ACAGAC**GAC**TAAGATA-AC**GTC**  
Fuol -AC**TAAAA**TAGATAA-----AAGGGTATATTT-----TTTA**GCT**AAAAATAATT**AGC**  
Gmaf -AC**TTAAT**TAGGCAAA----AGG-CACACAAAAC-----CC**GCC**AAAGATA-AT**AGC**  
Xeei -AC**TAAAA**TAGACAAC----AGGACATAACCCCA-----C**GCT**ATAAATA-AT**AGC**  
Pros -AC**TAAAT**TAGGCAAG----GGGGTACATCCCTT-----AA**GCC**CAAAAAT-AG**GGC**  
Scmi -AC**TAAAA**TAGGAAAG----GGAGCACATCCCCT-----TAA**GCC**CAAAATT-AG**GGC**  
Rolo -AC**TAAAG**TAGGCAA----GAGGGCATGC-CCC-----CCA-**GCC**TGAGAAC-AT**GGC**  
Cere -AC**TTAAT**TAGGCCAG----AGGGCATA--CC-C-----TCT**GCC**TAAAAGA-AC**GGC**  
Daga -AC**TTAAG**TAGGTTAA----AGGGCATG-CCCT-----TTA-**GCC**TAAAAGA-AC**GGC**  
Anco -AC**TAAAA**TAGGCAAG----AGGGCATGCCCTTAA-----**GCC**TAAGAAA-AT**GGC**  
Dmve -AC**TAAAA**TAGGCAAA---AG--GC--ATGCCCCAC-----A**GCC**TCAGAAA-AC**GGC**  
Dmar -AC**TAAAT**CAGGCAAA----AG-GCACACCTCCGGC-----A**GCC**CAAGAAA-AA**GGC**  
Anka -AC**TAAAA**TAGGCAAG----AGGGCATAACCC-T-----AAA**GCC**CAAGAAA-AT**GGC**  
Moja -AC**TAAAA**TAGGCAAG----AGGGCACA---AA-CC-----CCA**GCC**TAAAAAA-AC**GGC**  
Hoja -AC**TAAAA**TAGGCAAG----AGGGCATACC-----CC-----TTAA**GCC**TAAGAAA-AT**GGC**  
Bede -AC**TAAAA**TAGGCAA-----GGGGCATACCCCTA-----A**GCC**TAAGAAC-AT**GGC**  
Besp -AC**TAAAG**TAGGCAAG----GGGGCATA--CCCC-CT-----AA**GCC**TAAGAAC-AT**GGC**  
Mysp -AC**TAAAT**CAGATAAG----AGGACATACCACCA-CA-----TAAA**GCC**CACGAAA-AT**GGC**  
Osja -AC**TAAAA**CAACAAG----AGGGC-ATACCCTA-CG-----A**GCC**TCCGAGA-AC**GGC**  
Sgro -AC**TAAAA**CAACAAG----GGGGCATATCCCAC-----ATA**GCC**CTCGAGA-AT**GGC**  
Pzpa -AA**TAAAGAAG**ACAAA---GGG-AC--ATATTATCTT-----AT**ATT**CTAGAAA-AG**AAT**  
Zeja -AA**TAAAGAAG**ATAAG----CAGGGTTATTTTT-----ACT**ACT**ATAGACC-AC**AGT**  
Znne -AA**TAAAGAAG**ATAAA---AGGG-ATTACTAATT-----T**ACT**TAAGAAA-AC**AGT**  
Zefa -AA**TAAAGAAG**GCAAG----AGGGTGTA--TTAA-TT-----AT**ACT**TAAGAAA-AT**AGT**  
Acni -AA**TAAAGAAG**GTAAG----GGGGGCTACTAC-----TCT**ACT**TAAGAAA-AT**AGT**  
Ncrh -AA**TAAAGAAG**GTAAG----AGGGG-GCTACTA-----CTCT**ACT**TAAGAAA-AT**AGT**  
Agca -AC**TAAAA**CAGGCAAA----GGGGCATATCCTT-----AA-T**GCC**TGAGAGA-AT**GGC**  
Hydy -AC**TGAAA**AAGGTAAG----AGGGCATAACC-----C-----CGT**GCC**GAAGATT-AC**GGC**  
GsaC -AC**TAAAA**CAGACAAA----AGGGCATAACCC-----CCT**GCC**GGAGATT-AC**GGC**  
Pevo -AC**TAAAA**TAGACAAA----GGGACATAATCTTG-----C**TTC**TTAGAAT-AA**GAC**  
Hiku TAT**TAAAGGT**TAAAAC----AACACAAG----AG-AC-----C**CTA**GAATATA-AC**TAT**  
Inpa -AC**TTAAT**CAGACACA----AGGGCATACTCCC-----TA**GCC**TGAGAAA-AA**GAA**  
Auch -TC**TAAAA**CAGGTAA-----GGTGACACACACCC-----C**ACG**TGAGAC-AA**AGA**  
Fico -AC**TAAAT**TGGACAAG----GGGGAGCA--CCCA-TT-----T---**GCC**CAAGATA-AT**GGC**  
MacS -AC**TAAAA**TAAAGTAAG----GGGGCATGCCCTT-----TT--**GCC**AAAGATA-AT**GGC**  
Moal -AA**TCA-ATTG**ACGTT----AGAAAGTAAC-TT-----AA-A**ATC**TTAGACT-AA**GAT**  
Syma -AC**TAAAGCGG**-TATA----AGGATATATCCCTACAA-----**ACC**CAAGAGA-TT**GGT**  
Maf r -AC**TAAAT**TAGGCATA---AGGG-CATCGTCC--CC-----AT--**GCC**TAAGACT-AA**GGC**  
Dcpe -TC**TAAAT**TAAACAAA----AGGACACCCCCCCC-----CCC**GCC**GAAGACA-AC**GGT**  
Dct i -TC**TAAAT**TAAACAAA----AAGGACACCCCCCCC-----CCCC**GCC**GGAGACA-AC**GGC**  
Hehi -AC**TAAAG**TAGGCAAG----AGGGC-ATACCCCC-G-----T**GCC**TGAGAGA-AC**GGC**  
Stam -AC**TAAAA**TAGGCAAC---TGG-GC--ATGCCCCGCC-----**GCC**TAAGAAA-AC**GGC**  
Hogi -AA**TAAAT**TAAATGAC---GGGGGAAACCT-----CAC**GCC**TGAGAAA-AC**GGC**  
Erzo -AC**TAAAA**TAGGTAAG----AGG--ACATACCA-----CCCA**GCC**TGAGAAA-AC**GGC**  
Hxot -AC**TAAAG**TAGGCAAA----AGG--GCATACCCT-----GTTT**GCC**TAAGAAA-AA**GGC**  
Core -AC**TAAAA**TAGGCAAT---AGGGCATGCCCTT-----GT**GCC**TAAGAAA-AA**GGC**  
Apve -AC**TAAAG**TAGACAAA---A---GG--GCATGCCCTT-----AT**GCT**GAGAAAA-AA**GGC**  
Lat j -AC**TAAAT**TGGATAAA----GGGACGTGCCATAA-----TTAT**GTC**AGAGAGA-AT**GAC**  
Laja -AC**TAAAA**CAGACAA-----AAGGGCATAACC-----CC**GCC**TGAAAAA-AA**GGC**

Syja -AC**TAAAA**TGGACAAA----GGAGCATACCCCAACT-----AATT**ACC**GAAAATA-AC**GGT**  
 Epme -AC**TTAAT**CAGACAAG----GGGACAT-CCTCAT-----TTCT**GTC**CTAGAAA-AT**GAC**  
 Grse -AC**TAAAG**CAGGCAAG----AGGGCATACCTCTAT-----**GCC**TGAGAAA-AT**GCC**  
 Clja -AC**TCAACT**CGACAAA----AGGGCATAACTC-C-----TT**CTG**TCGAGAC-CA**GAC**  
 Ogcy -AC**TAAAA**CAGGTAAG----GGGGCATA-C-TCC-----CT**TTT**CAACCTG-AA**AAA**  
 Plna -AC**TAAAG**TAGGTAAC----AGGCCATAACCTTA-----**ATG**TCAAAA-AA**GAC**  
 Lema -AC**TAAAA**TAGGCAAA----AGGGCATGCCCT-----TT**GCC**GAAGATT-AC**GCC**  
 Etzo -AC**TAAAA**TAGGCAAG----AGGGCATGCCCC-C-----CT**GCC**GGAGAAA-AC**GCC**  
 Apse -AC**TAAAA**TAGGTAAG----AG--AGCATACTCC-----T-TT**GTC**TAAGAGA-AA**GAC**  
 Epde -AC**TAAAA**TAGGCAAA----AGG-GC--ATGCCCT-A-----T**GCC**TGAGAAA-AT**GCC**  
 Slja -AC**TAAAA**TAGAGAAG----GGGGCATA----AA-CC-----CACA**ACT**TGACACC-T**AGA**  
 Bsja -AC**TAAAA**CAGGTAAG----AGGGCATA--CCCC-CT-----CC-**GCC**CAAGAAA-AA**GCC**  
 Ecna -TC**TAAAT**TAGGCAAA----AGGGTATACAAT-----TAAT**GCC**TAAGATA-AA**GCC**  
 Cohi -TC**TAAAT**TAGGTAAG----AGGACACAAAACCTTCA-----**GCC**TTAGAGA-AA**GGT**  
 Caar -TC**TAAACT**TAGGCAAA----AGGGTGCACC-----CC-----CCGT**GCC**TAAGAGA-AC**GCC**  
 Came -TC**TAAACT**TAGGCAAG----AGG-GT--ACATTCCCC-----AT**GCC**TAAGAGA-AT**GCC**  
 Mema -TC**TAAACT**TAGACAAG----AAGGCGTA--CC-C-----CTAT**GCC**TGAGAGA-AT**GCC**  
 Lenu -AA**TAAAT**TAAGATAAG----GGGAAGACCC-----CC---CCCACC**GCC**C-AGAAC-AG**GAC**  
 Brja -AC**TAAAT**TAGGCAAG----AGGG-CATACCCACC-TC-----CCAC**GCC**TGAGATA-AT**GCC**  
 Plma -AC**TAAAT**TAGGCAAA----AGG-GC--ATATCCCTT-----CAC**GCC**AAAGATA-AT**GCC**  
 Emst -AC**TAAAT**TAGGCAAA----AGGGCATA--CCCTG-C-----T**GCC**TGAGAAA-AT**GCC**  
 Ptti -AA**TAAAT**TAGGCAAA----AGGGCACAACCCGT-AT-----**GTC**TGAAAGA-AC**GAC**  
 Losu -AC**TAAAA**CAACAAA----AGGGACATAACACTT-TA-----**CCT**GAGAAA--AG**AGT**  
 Geoy -AC**TAAAG**CAGGTTAA----GGGAA-ACATAATC-CC-----**GCC**TAAGAAA-AC**GCC**  
 Dipi -AC**TAAAT**TAGGTAAG----AGGGC-ATAACCC-----CGT**GCC**TGAGAGA-AT**GCC**  
 Pama -AC**TAAAG**CAGGCAAA----AGGGCACA--CCCC-----TCT-**GCC**TGAGAGA-AT**GCC**  
 Leob -AC**TAAAG**TAAGCAAA----AGGGCGTA--CCCC-TT-----TC-C**GCC**TAAGAAA-AC**GCC**  
 Neba -AC**TAAAT**TGAATAAC----AGG--GCATACCC-----TGCT**GCT**TAAGAAA-AT**AGC**  
 Pdpi -TC**TAAAT**TAGACAAA----GGAGGGCATCCAC-----CGAT**ACC**GAAGAGC-CC**GGT**  
 Nimi -AC**TAAAC**CAGATAAA----AGGACACATTTATTTGTAGGTACTACA**GCC**TAAGAAA-AT**GCC**  
 Uptr -AC**TAAAT**TAAATAAT----AGGGCGCAACATT-----CCG**ACC**TAAGATA-AA**GCC**  
 Pesc -AC**TAAAT**TAGGCAAG----GGACTGAGTTT-----**AATC**TGAGAGG-AC**GAT**  
 Baar -AC**TAAAT**TAGACAAG----AGGACATACCCCCCCCC-----**GCC**TAAGAAA-AT**GCC**  
 Moar -AC**TAAAT**TAGGCAAC----AGGGCATATCCCCCT-----**GCC**TGAGAAAAT**GCA**  
 Toja -TC**TAAACT**TAGGCAAA----AGGGCATGCCCT-----CGT**GCC**TAAGAAA-AT**GCC**  
 Chau -AC**TAAAT**TAGGCAAG----AGGGCATACTCAC-----AGT**AAC**CGAGAAA-AT**GTT**  
 Chse -GC**TCAAT**TAGGTAAG----AGGGCATAATTCC-----TCT**GCC**ATAGAAA-AT**GCC**  
 Enar -AC**TAAAT**TAGGCCAA----AGGGCATACCC-----C-----CCGT**TCC**TAAGAAA-AC**GCC**  
 Hpty -AC**TAAAT**TAGGCAAA----AGGGCATGCCCT-----TGT**GCC**TAAGAAA-AT**GCC**  
 Nana -AC**TAAAT**TAGACAAA----AGGGCGTATCCCC-----TGT**GTC**TAAGAAA-AA**AGA**  
 Mcst -AC**TAAAT**TAGGCAAA----AGGGCATGTCCCTTG-A-----T**GCC**TAAGAAA-AT**GCC**  
 Rhox -AC**TAAAT**TAGATAAT----AGGGCGTA--CAAC-CC-----AC-A**GCC**AAAGACA-AT**GCC**  
 Opfa -AC**TAAAT**TAGCCAAA----AGGGCATATCCCAT-----CCCC**GCC**TGAGAAA-AC**GCC**  
 Paar -AA**TAAAT**TAAACAAG----AGGGC-ATAAACCG-TA-----T**GCC**CAAGAAA-AT**GCC**  
 Gozo -AC**TAAAT**TAGGCCAA----AGGGCATAATTCA-----CCC**GCC**AAAGAAA-AT**GCC**  
 Ackr -AC**TTAAC**TAGCTAAG----AGGGCACCCCCCCC-----A**CCA**CGAAATC-AG**TGA**  
 Elev -AC**TAAACA**AGGCTAG----AGGGC-ATGCCCC-CTA-----**GCC**TGAAATTTAA**GCC**  
 Trdu -AC**TAAAT**TAGATAAA----AG--GGCGTACCC-----CTA**GCC**CTAGAAA-AG**GCC**  
 Amoc -AA**TAAAT**CAGGTAAG----AGGGCATACTCT-----CC-C**GCC**TAAGATA-AT**AGC**  
 Hame -AC**TAAAT**TAGGTAAG----AGGGCATG--TGCT-TC-----CC-A**GCC**TAAGATT-AC**GCC**  
 Chso -AC**TAAACT**TAGCCAAG----AGGGGTACCACCACC-----AAA**GCC**TGAGATC-AA**GCC**  
 Lyto -AC**TAAAG**CAGGCAAA----AGGGC-AT-GCTGCC-C-----T**GCC**CAAGAAA-AA**GCC**

Encr -AC**TAAAA**TAGGCAAA----AGGGCATG-CCCTC-CT-----**GCC**TAAGATG-AA**GGC**  
 Bvar -AC**TAAAA**TTGGCAAG----GGGGCATGACCCT-----TATA**GCC**AAAGAAA-AT**GGC**  
 Noco -AC**TAAAA**TAGACAAG----GGGGTATGTTTTCCC-----C**GCC**AGAGAAA-AT**GGC**  
 Chsp -AT**CAAAA**TAGACCAC----AGGACATAACAAAT-----AG**ACC**GAAGATC-TA**AGT**  
 Arja -AC**TAAAG**TAGGCAAA----AGGG--CATGCCCT-T-----GT**GCC**TGAGAAA-AA**GGC**  
 Pase -AA**TTAAA**CAGCCAAC----TGGATACC--CC-C-----TCCCC**ATA**TGAGAGC-CA**TAT**  
 Trel -GC**TAAAG**TGACAAG----GGGATATGTTTAAG-AC-----CCAC**GCA**GCAGAAA-AC**TGT**  
 Lifa -AC**TAAAA**TAGTTAAG----GGGGCATAAGTAAT-CC-----A--A**ACC**GCAGACA-AC**GGT**  
 Acur -AC**TAAAA**CAACCAAG----AGGACATACTATC-----TC**CCC**GTAGAAA-AT**GGT**  
 Ampe -AC**TAAAA**TAGGCAAA----AGGGCATGCCCC-----TAT**GCC**TGAGAAA-AT**GGC**  
 Urja -AA**TAAAA**TAAAGCAAA----AGGGCATACTT-----TCA**GCC**TGAGACT-AA**GGC**  
 Enet -AC**TAAAG**AGGGTAAT----GAGACACCCGTCT-----CC**GCC**ATAAAAT-AC**GGC**  
 Ptbr -AC**TTAAT**TAGATAAA----AGTAA-TT--TCAC-AC-----A**CCC**CTAGACT--A**GGA**  
 Safa -AC**TAAAA**TAGGCAAG----GGGACATCCT----CC-----TAA**GTT**GAAGAAA-AT**AAC**  
 Icae -AC**TAAAA**TAGGCAAA----AGGGCATATCCCT-----TCAC**GCC**CAAGATA-AT**GGC**  
 Asmi -TC**TCAAT**TGGATAAA----AATGCACACCCCTG-----CTTCT**TCA**AAAGAAA-AC**TGC**  
 Foal -AA**TAAAA**TAGATAAA----AGGGTTAACTAACCC-----**GCC**ATAAATT-AT**GGC**  
 Drze -AC**TTAAA**TGGATAAG----TGGGCATAATA-----CTCT**GTC**AAAAAAA-AT**GAC**  
 Rhas -AC**TAAAA**CAGGCAAA----AGGACATGACCC-C-----CC**GCC**TAAGAGA-AA**GGC**  
 Elac -AA**TAAAA**AAGGCAAA----GGGGTACATCCTCCG-----T**GCC**TGAGAAA-AA**GGC**  
 Kugu -AC**TAAAA**TAGATAAA----AGGGCATACT--ACC-----AA**ACC**TGAAAAA-AC**GGC**  
 Plor -TC**TAAAA**CAGGCAAG----AGGGCATACTCC-----AT**GCC**TAAGAAA-AC**GGC**  
 Sgun -AC**TAAAA**TAGACAAA----AGGGC-ATATCCCTG-----C**GCC**TGAGAAA-AT**GGC**  
 Zaco -AC**TAA**-ATAGACAAA----AAGGCATA-CCCCTCCT-----A**CCC**-GAGAAA-AT**GGG**  
 Zbfl -AC**TAAAG**TAGACAA-----AAGGGCATATTT-----CCCC**GCC**TGAGAAA-AT**GGC**  
 Spba -TC**TAAAT**TGGACAAA----AGGGC-ATAATTCT-TT----TCCAT**GCC**AAGACA--AC**GGC**  
 Game -AC**TAAAA**TAGGCAAA----AGGGCATACTCCCT-----ACAC**GCC**CAAGATA-AT**GGC**  
 Thth -AC**TAAAA**TAGGCAAA----AGGGC-ATACCCCTCCA-----C**GCC**CAAGATA-AT**GGC**  
 Xigl -TC**TAAACT**TAGGCAAG---AGG-GC--ATACCTTCA-----T**GCC**TGAGAGA-AT**GGC**  
 Hyja -AC**TAAAA**TAGGCAAA----AGAGCATATCCCTTTAT-----**GCC**GGAGATACAC**GGT**  
 Psan -AC**TAAAA**TAAATTA--AGAGCATACCTACCAG-----T**GTC**GGAGATAGAC**GGC**  
 Cupa -AC**TAAAA**TAGGCAAA----AGGGTATACCCCTC-----CTAC**GCC**CAAGATA-AT**GGC**  
 Mpch -AC**TTAAT**TAGGCAAG----GGGGCATACT----C-----TTT**GCC**TAAGAAA-AT**GGC**  
 Char -AC**TAAAT**TAGGTAAG----GGGGCATGACTCCTCCC-----**GCC**AAATATA-AT**GGC**  
 Pser -TA**TCAACT**TAGGTAAG----AGG-CATATCCCCC-C-----**GCC**CAAGAAA-AC**GGC**  
 Prol -TC**TAAACT**TAGGTAAG----AGG-GCATAACCAT-----CTGT**GCC**GAAGATA-AC**GGC**  
 Plbi -TC**TAAACT**TAGGCAAA----AGGGCATAACCATT-----TT**GCT**GGAGATA-AC**AGC**  
 Calu -AC**TAAAT**CAGGCAAG---GAGG-CGCAACCCTC-CG-----**CAC**TTAGAT---A**GTC**  
 Papa -TC**TAAACATA**-TAAC----AGGGAGCGGTATCTC-----A**AGC**GGAGATA-AC**GCT**  
 Suf r -AC**TCAAC**CGAACAAA----GAGATGCTTAACCAC-----**GTT**AAAGAGC-AT**GGC**  
 Stci -AA**TAAAG**TAAAGCAAG----GGAGGACAACCTTTG-----A**GCC**ATAAATC-AT**GGC**  
 Taru -GC**TCAAG**CAATAAAG----AGAGTACAAAACCTAA-----**GTC**AAAGAAC-AT**GAC**  
 Rala -AC**TAAACT**TAGGTAAG----GGGGCATATA-----CC-----CCT-**GCC**TGAGATA-AT**GGC**

\*

|       |                       |
|-------|-----------------------|
| Scca  | T-----                |
| Muma  | T-----                |
| Erca  | TA-----               |
| Pose  | A-----                |
| Act r | CAA-----              |
| Scal  | AA-----               |
| Posp  | AA-----               |
| Atsp  | CCA-----              |
| Leoc  | ACA-----              |
| Amca  | AA-----               |
| Osbi  | A-----                |
| Pabu  | AA-----               |
| Hial  | GC-----               |
| Elha  | GC-----               |
| Mlcy  | AC-----               |
| Algl  | TAC-----              |
| Ptgi  | GC-----               |
| Alaf  | AC-----               |
| Nock  | AC-----               |
| Anja  | AT-----               |
| Gyki  | AT-----               |
| Syka  | AT-----               |
| Opma  | AG-----               |
| Comy  | AT-----               |
| Sasp  | GC-----               |
| Eupe  | -----                 |
| Enja  | CGTCTTATTTATTCGC----- |
| Same  | TCGC-----             |
| Chch  | TT-----               |
| Grgr  | AT-----               |
| Caau  | AT-----               |
| Cyca  | ATACTGG-----          |
| Dare  | T-----                |
| Cost  | AC-----               |
| Leec  | AC-----               |
| Cr la | AC-----               |
| Clmc  | CT-----               |
| Phin  | TAA-----              |
| Icpu  | -----                 |
| Psto  | -----                 |
| Cora  | -----                 |
| Eisp  | T-----                |
| Apal  | -----                 |
| Es lu | GC-----               |
| Dape  | GC-----               |
| Glse  | GC-----               |
| Naar  | GC-----               |
| Baoc  | GC-----               |
| Opso  | GC-----               |
| Al te | AT-----               |
| Plap  | AT-----               |

|      |                                                           |
|------|-----------------------------------------------------------|
| Plal | ATCCTAGTGTGGCAGGGCTCGGGTAACAACCCACCCTGCTACCC-----         |
| Sami | ATCCTTGTGTGGCAGGATCTAGAAAGTCGTTCTGC-----                  |
| Rere | GCCCGCATCTCAACGTGGCGGTAACCGGCGTGCCGGGGCCTTCCGGCCTTGCCTTCT |
| Gama | GC-----                                                   |
| Onmy | GC-----                                                   |
| Sasa | GC-----                                                   |
| Cola | GC-----                                                   |
| Dita | T-----                                                    |
| Gogr | T-----                                                    |
| Chsl | A-----                                                    |
| Atja | AT-----                                                   |
| Iido | AT-----                                                   |
| Auja | AT-----                                                   |
| Chag | AT-----                                                   |
| Hami | AT-----                                                   |
| Saun | AT-----                                                   |
| Nema | AT-----                                                   |
| Disp | TTG-----                                                  |
| Myaf | A-----                                                    |
| Lagu | TA-----                                                   |
| Trtr | CT-----                                                   |
| Zucr | CT-----                                                   |
| Pxja | AA-----                                                   |
| Pxlo | AA-----                                                   |
| Pctr | AA-----                                                   |
| Apsa | AT-----                                                   |
| Cabe | AC-----                                                   |
| Bzze | AT-----                                                   |
| Siim | AC-----                                                   |
| Ctru | AT-----                                                   |
| Dpbr | AT-----                                                   |
| Caki | AA-----                                                   |
| Phja | CGTTT-----                                                |
| Brsp | AGTTGGCAGATTGTTGAATATTCTGTAGCTCCTAA-----                  |
| Gamo | TGT-----                                                  |
| Lolo | CGT-----                                                  |
| Batr | TCCC-----                                                 |
| Prmy | -----                                                     |
| Loli | AT-----                                                   |
| Loam | AT-----                                                   |
| Chab | AT-----                                                   |
| Chto | AT-----                                                   |
| Majo | TT-----                                                   |
| Hlst | TT-----                                                   |
| Clpe | AC-----                                                   |
| Mlmr | AT-----                                                   |
| Crcr | AT-----                                                   |
| Muce | AT-----                                                   |
| Bege | GT-----                                                   |
| Mela | AT-----                                                   |
| Hats | AAA-----                                                  |
| Orla | AT-----                                                   |

|       |          |
|-------|----------|
| Cosa  | AT-----  |
| Exsp  | AT-----  |
| Depa  | TT-----  |
| Rima  | TT-----  |
| Fuol  | GT-----  |
| Gmaf  | T-----   |
| Xeei  | AA-----  |
| Pros  | GT-----  |
| Scmi  | CT-----  |
| Rolo  | AT-----  |
| Cere  | GT-----  |
| Daga  | GT-----  |
| Anco  | AT-----  |
| Dmve  | GT-----  |
| Dmar  | GT-----  |
| Anka  | AT-----  |
| Moja  | AT-----  |
| Hoja  | AT-----  |
| Bede  | AT-----  |
| Besp  | AT-----  |
| Mysp  | AA-----  |
| Osja  | AT-----  |
| Sgro  | AT-----  |
| Pzpa  | AT-----  |
| Zeja  | AT-----  |
| Zzne  | AC-----  |
| Zefa  | AA-----  |
| Acni  | AT-----  |
| Ncrh  | AT-----  |
| Agca  | AT-----  |
| Hydy  | AT-----  |
| Gsac  | AT-----  |
| Pevo  | AT-----  |
| Hiku  | AT-----  |
| Inpa  | TTA----- |
| Auch  | CCA----- |
| Fico  | AT-----  |
| Macs  | AT-----  |
| Moal  | AT-----  |
| Syma  | AT-----  |
| Maf r | CT-----  |
| Dcpe  | AG-----  |
| Dct i | AG-----  |
| Hehi  | AT-----  |
| Stam  | AT-----  |
| Hogi  | AT-----  |
| Erzo  | AT-----  |
| Hxot  | AT-----  |
| Core  | AT-----  |
| Apve  | AT-----  |
| Lat j | AT-----  |
| Laja  | AT-----  |

|      |                    |
|------|--------------------|
| Syja | CATGTTAAAGTGG----- |
| Epme | AA-----            |
| Grse | AT-----            |
| Clja | AAT-----           |
| Ogcy | AAGCTT-----        |
| Plna | AA-----            |
| Lema | AT-----            |
| Etzo | AT-----            |
| Apse | T-----             |
| Epde | AT-----            |
| Slja | TAACGGTAT-----     |
| Bsja | AT-----            |
| Ecna | AA-----            |
| Cohi | -----              |
| Caar | AT-----            |
| Came | AT-----            |
| Mema | AT-----            |
| Lenu | AT-----            |
| Brja | AT-----            |
| Plma | AT-----            |
| Emst | AT-----            |
| Ptti | AT-----            |
| Losu | AC-----            |
| Geoy | GT-----            |
| Dipi | AT-----            |
| Pama | TA-----            |
| Leob | ATTACACT-----      |
| Neba | ATT-----           |
| Pdpl | AACA-----          |
| Nimi | TT-----            |
| Uptr | AACC-----          |
| Pesc | TC-----            |
| Baar | AT-----            |
| Moar | T-----             |
| Toja | AT-----            |
| Chau | AT-----            |
| Chse | AA-----            |
| Enar | AT-----            |
| Hpty | AT-----            |
| Nana | CAT-----           |
| Mcst | AT-----            |
| Rhox | CT-----            |
| Opfa | AT-----            |
| Paar | AT-----            |
| Gozo | AT-----            |
| Ackr | TTA-----           |
| Elev | TT-----            |
| Trdu | TT-----            |
| Amoc | AT-----            |
| Hame | CT-----            |
| Chso | AC-----            |
| Lyto | AT-----            |



|      |           |
|------|-----------|
| Encr | AT-----   |
| Bvar | AT-----   |
| Noco | AC-----   |
| Chsp | C-----    |
| Arja | AT-----   |
| Pase | AA-----   |
| Trel | AA-----   |
| Lifa | TCCT----- |
| Acur | AC-----   |
| Ampe | AT-----   |
| Urja | AC-----   |
| Enet | TT-----   |
| Ptbr | -----     |
| Safa | AT-----   |
| Icae | AT-----   |
| Asmi | T-----    |
| Foal | TT-----   |
| Drze | AT-----   |
| Rhas | AT-----   |
| Elac | AT-----   |
| Kugu | AC-----   |
| Plor | AT-----   |
| Sgun | AT-----   |
| Zaco | CC-----   |
| Zbfl | AT-----   |
| Spba | ACA-----  |
| Game | AT-----   |
| Thth | AT-----   |
| Xigl | AT-----   |
| Hyja | ATA-----  |
| Psan | ATAC----- |
| Cupa | AT-----   |
| Mpch | AT-----   |
| Char | TT-----   |
| Pser | AC-----   |
| Prol | GT-----   |
| Plbi | AA-----   |
| Calu | T-----    |
| Papa | TA-----   |
| Sufr | AT-----   |
| Stci | AT-----   |
| Taru | AT-----   |
| Rala | AT-----   |
