# Supplementary material for: Structure and variation of the mitochondrial genome of fishes
Source: PubMed Central journal article supplement (PMC5015259; doi:10.1186/s12864-016-3054-y), 2016-09-07
Supplement: 12864_2016_3054_MOESM16_ESM.pdf [file 12864_2016_3054_MOESM16_ESM.pdf]

**Additional file 16: Figure S5. Aligned nucleotide sequences of the origin of L-strand replication (blue and magenta letters) in mt genomes of 250 fishes.**

Species name abbreviation followed by aligned sequences. See Additional file 1 for abbreviation of species name. Blue and magenta letters denote the stem and loop, respectively. Framed rectangle denotes conserved motif sequence. Underline indicates AA stem sequences of the tRNA-Asn gene.

|      |      |                    | o <sub>L</sub> |                       |       |                       |       |            |               |
|------|------|--------------------|----------------|-----------------------|-------|-----------------------|-------|------------|---------------|
| Scca | ATTG | --GAAAGAGGGCGCGA   | ----           | GTTTTA                | ----- | TGTTCCGCCCTCTTC       | ----- | GA         | <b>GGCCG</b>  |
| Muma | AGAT | --CCGAAAGAGGGCGG   | ----           | CGGAATGTTTTT          | ----- | CCGCCCTCTTCG          | ----- |            | <b>GGCCG</b>  |
| Erca | GATT | --CGAAGGAGGGCGG    | ----           | CCTTCGGTTTTT          | ----- | CCGCCCTCCTTC          | ----- |            | <b>GGCCA</b>  |
| Pose | GGAT | --CCGAAAGGAGGGCGG  | ----           | CTTTGAGATTTT          | ----- | CCGCCCTCCTTCG         | ----- |            | <b>GGCCG</b>  |
| Actr | TAGA | --TGAAGGAGGGCGG    | ----           | TCCCCCTCCT            | ----- | CCGCCCTCTTCA          | ----- |            | <b>GGCCG</b>  |
| Scal | TAGA | --TGAAGGAGGGCGG    | ----           | TATGCCCTCCCCT         | ----- | CCGCCCTCCTCA          | ----- |            | <b>GAGCCG</b> |
| Posp | TAGA | --TGAAGGAGGGCGG    | ----           | TCCTCCTATTT           | ----- | CCGACCTCCTCA          | ----- |            | <b>GGCCG</b>  |
| Atsp | TGCA | --GAAGGAGGGCGGACGG | ----           | TTCCGTCTC             | ----- | CCTTCGCGCCCTTC        | ----- |            | <b>GGCCG</b>  |
| Leoc | AGAT | --GAAGGAGGGCGGA    | ----           | CGGTTCCGCCCTTTT       | ----- | TCCGCCCTCCTTC         | ----- |            | <b>GGCCG</b>  |
| Amca | GGTG | --CTGAAAGAGGGCGG   | ----           | CAAAGCTGCCGCT         | ----- | CCGCCCTCTTCG          | ----- |            | <b>GGCCG</b>  |
| Osbi | GATG | --GAAGGAGGGCGG     | ----           | CATTGCCTCACT          | ----- | CCGCCCTCCTTC          | ----- |            | <b>GGCCA</b>  |
| Pabu | GTAG | --ATAGGAGGGCGG     | ----           | CGTCGATTTT            | ----- | CCGCCCTCCTAT          | ----- | TCG        | <b>GGCCG</b>  |
| Hial | ATGA | --GAAGGAGGGCGGG    | ----           | CCCTCCCCCT            | ----- | CCCCGCCCTCCTTC        | ----- |            | <b>GGCCG</b>  |
| Elha | ATTG | --GGAGGAGGGCGG     | ----           | CGGCCCTCACT           | ----- | CCGCCCTCCTCC          | ----- |            | <b>GGCCG</b>  |
| Mlcy | GGTG | --GGGTGAGGGCGG     | ----           | CGGATTTTACT           | ----- | CCGCCCTCCATCC         | ----- |            | <b>GGCCG</b>  |
| Algl |      | not found          |                |                       |       |                       |       |            |               |
| Ptgi | TTGT | --GAAGGAGGGCGG     | ----           | CCGAACACCCCCT         | ----- | CCGCCCTCCTTC          | ----- |            | <b>GGCCG</b>  |
| Alaf | ATCA | --GAAGGAGGGCGG     | ----           | CTTTCCCTGGTT          | ----- | CCGCCCTCCTTC          | ----- |            | <b>GGCCG</b>  |
| Nock | ATCG | --GAAGGAAGGCGG     | ----           | CTTTCCCTGGTT          | ----- | CCGCCCTCTTC           | ----- |            | <b>GGCCG</b>  |
| Anja | GTGG | --ATGGGGGGGGG      | ----           | TTACCCCTTTC           | ----- | CCCCCCCCCAT           | ---   | ATTGATTCGA | <b>GGCCA</b>  |
| Gyki | AGAT | --GAAGGGGCGAG      | ----           | AGGCCCC               | ----- | CTCCCCCTTC            | ----- |            | <b>GAGCCG</b> |
| Syka | AGAT | --GGAGGAGGGCGG     | ----           | CAATTGCCCT            | ----- | CCGCCCTCCTCC          | ----- |            | <b>GGCCG</b>  |
| Opma | GATG | --GAGGGGCGGAG      | ----           | AAGCCCCCTCCTC         | ----- | CGCCAGAGCCAGACTC      | ----- | TTT        | <b>CGGG</b>   |
| Comy | AATA | --CAGGGGAGGGG      | ----           | CGCCCCCCCCCT          | ----- | CCCTCCCCCTG           | ----- | CT         | <b>GTCCG</b>  |
| Sasp | AAGA | --CCGGCGGGCGGCA    | ----           | TTTTA                 | ----- | ATGCCGTTCCGTTCCCGCCG  | ----- |            | <b>ATGCTG</b> |
| Eupe | TGTT | --CTGGCGGGGGGGCG   | ----           | TATTTA                | ----- | CGCCTAACCCGTTCCCGCCAG | ----- | TCC        | <b>CTCCG</b>  |
| Enja | GGAT | --GAAAGGGGCGG      | ----           | CGGAGGCATTTT          | ----- | CCGCCCTTTC            | ----- |            | <b>GGCCG</b>  |
| Same | GGAT | --GAAGGAGGGCGGAG   | ----           | GCCCCCT               | ----- | CTCCGCCCTCTTC         | ----- |            | <b>GGCCG</b>  |
| Chch | AGAT | --GAAAGGGGCGGA     | ----           | ATTAGCCTTG            | ----- | TCCGCCCTTTC           | ----- |            | <b>GGCCG</b>  |
| Grgr | GAAA | --TGAAGGGGCGG      | ----           | CGCCGACTCCGGCATCCCCCT | ----- | CCGCCCTTCA            | ----- |            | <b>GGCCA</b>  |
| Caau | AGAT | --GAAAAGGGCGGCAAA  | ----           | TTGAGTC               | ----- | TTTCGCCCTTTC          | ----- |            | <b>GGCCG</b>  |
| Cyca | AGAT | --GAAAAGGGCGG      | ----           | CAAATTGAGTCATT        | ----- | CCGCCCTTTC            | ----- |            | <b>GGCCG</b>  |
| Dare | AGAT | --GAAAAGGGCGG      | ----           | CAACTTGGGCCATT        | ----- | CCGCCCTTTC            | ----- |            | <b>GGCCG</b>  |
| Cost | AGAT | --GAAAGGGCGG       | ----           | CGAATCGGCTCATT        | ----- | CCGCCCTTTC            | ----- |            | <b>GGCCG</b>  |
| Leec | AGAT | --GAAAGGGCGG       | ----           | CATCGGCCATT           | ----- | CCGCCCTTTC            | ----- |            | <b>GGCCG</b>  |
| Fola | GATG | --GAAAGCGG         | ----           | GCAATCGCCTCATT        | ----- | CCGCCCTTTC            | ----- |            | <b>GGCCG</b>  |
| Clmc | ATGG | --GAAAGGGGCGG      | ----           | CATAGTCTCTTT          | ----- | CCGCCCTTTC            | ----- |            | <b>GGCCG</b>  |
| Phin | AGAT | --GAAAGGGGCGG      | ----           | CGGGAATTTT            | ----- | CCGCCCTTTC            | ----- |            | <b>GGCCG</b>  |
| Icpu | AGAT | --GAAAGGGGCGGA     | ----           | GGCGGGTTT             | ----- | TCCGCCCTTTC           | ----- |            | <b>GGCCA</b>  |
| Psto | AGAT | --GAAGGGGCGGAGGAA  | ----           | AGT                   | ----- | TTTTTCGCCCTTTC        | ----- |            | <b>GGCCG</b>  |
| Cora | AGAT | --GAAAGGGGCGG      | ----           | ACGGACATTT            | ----- | TCCGCCCTTTC           | ----- |            | <b>GGCCG</b>  |
| Eisp | AGAT | --GAAAGGGGCGG      | ----           | CGGAATTGTTT           | ----- | CCGCCCTTTC            | ----- |            | <b>GGCCG</b>  |
| Apal | AGAT | --GAAAGGGGCGG      | ----           | CGGATTTT              | ----- | CCGCCCTTTC            | ----- |            | <b>GGCCG</b>  |
| Eslu | GGAT | --GAAAGGGGCGG      | ----           | CGACTCCCCGCT          | ----- | CCGCCCTTTC            | ----- |            | <b>GGCCG</b>  |
| Dape | GATG | --GAAAGGGGCGG      | ----           | CGAAGCCCTT            | ----- | CCGCCCTTTC            | ----- |            | <b>GGCCG</b>  |
| Glse | AGAT | --GAAGAAGGGGCGGA   | ----           | CGCCCTCTC             | ----- | TCCGCCCTCTTC          | ----- |            | <b>GGCCG</b>  |
| Naar | GGAT | --GAAGAAGGGGCGG    | ----           | CGACCCCCCT            | ----- | CCGCCCTCTTC           | ----- |            | <b>GGCCG</b>  |
| Lioc | TCAC | --CGAAGAAGGGGCGGAG | ----           | ATTGCT                | ----- | CTCCGCCCTCTTCG        | ----- |            | <b>AGCCA</b>  |
| Opso | AGAT | --GAAGAAGGGGCGG    | ----           | CGGTCCCTTCT           | ----- | CCGCCCTCTTC           | ----- |            | <b>GGCCG</b>  |
| Alte | GATG | --GAAAGGGGCGG      | ----           | CTTCCCTTGT            | ----- | CCGCCCTTTC            | ----- |            | <b>GGCCG</b>  |
| Plap | GATG | --GAAAGGGGCGGACG   | ----           | CCGGCTC               | ----- | GTTCCGCCCTTTC         | ----- |            | <b>GGCCG</b>  |
| Plal | TAGT | --AGGGGCGGCGC      | ----           | CCC                   | ----- | GCCCCGCCCTT           | ----- | TCG        | <b>GGCCG</b>  |
| Sami | GGAT | --GAGGGGCGG        | ----           | CGCCCCGCT             | ----- | CCGCCCTTTC            | ----- |            | <b>GGCCG</b>  |
| Rere | GATG | --AAGAGGGGCGG      | ----           | CGGCC                 | ----- | CCGCATGCCCTTTT        | ----- | TCG        | <b>GGCCG</b>  |
| Gama | AGAT | --GAGAAGGGGCGG     | ----           | GCCCT                 | ----- | CGCAGCGCCCTTTTC       | ----- |            | <b>GGCCG</b>  |
| Onmy | AGAT | --GAAAGGGGCGGGG    | ----           | CCCCC                 | ----- | CCCCTCGCTCGCCCTTTC    | ----- |            | <b>GGCCG</b>  |
| Sasa | AGAT | --GAAAGGGGCGGTGG   | ----           | CCCCA                 | ----- | CCGCTCCGCCCTTTC       | ----- |            | <b>GGCCG</b>  |

|      |                                                                                                            |
|------|------------------------------------------------------------------------------------------------------------|
| Cola | GGAT--GAAAGGGGGCGGTGG-----CCCCA-----CCGCTCCGCCCCCTTTC-----GGGCCA                                           |
| Dita | AGAT--GAGAGGGGGCGCG-----GCC-----CGCGGCCCTTTC-----GGGCCG                                                    |
| Sigr | GATG--GGAAGGGGGCGCG-----GCC-----CGCCGCCTCTTTC-----GGGCCG                                                   |
| Chsl | AGAG--GAAAGCGGGCG-----CGCA-----GCTGCCTTTC-----GGGCCG                                                       |
| Atja | AGAT--GAAAGGGGGCGGA-----TTGCCCTGGT-----TCGCCCCCTTTC-----GGGCCA                                             |
| lido | AGAT--GAAAGGGGGCGGA-----TTGCCGCGGT-----TCGCCCCCTTTC-----GGGCCA                                             |
| Auja | AGAT--GAAAGGGGGCG-----CGACCCTCGGT-----CGCCCTTTC-----GGGCCG                                                 |
| Chag | AGAT--GAAAGGGGGCG-----CAATGCCCGCGCT-----CGCCCTTTC-----GGGCCG                                               |
| Hami | GATA--GAAAGGGGGCG-----CATTGCCCGTT-----CGCCCTTTC-----GAGGCCG                                                |
| Saun | AGAT--CGAAAGGGGGCG-----CTATTCTACTTGT-----CGCCCTTTCG-----GGGCCG                                             |
| Nema | GATG--GAAAGGGGGCGGCGAGAACG--CGCC-----CGTTCCGCCCCCTTTC-----GGGCCA                                           |
| Disp | AGAT--CAGAGGGGGCG-----TAATCTTACCCT-----CGCCCTCTG-----GGCC                                                  |
| Myaf | TGCT--GGGGGGGGGGGG-----RAWTTTNCCTT-----CCCCTCCCCCCCC-----CCGCTC                                            |
| Lagu | GTGG--GAGAGTGTGGAATGGGGTAGGGGTGGGGGGGGCGT--TCCCC-----<br>--ACCCCTCCCCCTCCCCCTGTGCCCATTCCTATAACTTC--GAGGCCA |
| Trtr | TGTC--CGAAAGGGGGCGGGG-----CG-----CCCCGCTTCCCG-----CATCCCT                                                  |
| Zucr | GGAC--AAAGGGGGGGG-----CGGCCCGTTTT-----CCCGCCCTTT-----AACCC                                                 |
| Pxja | GATG--GAAAGGGGGCGGAC-----TATTAT-----GTCCATTTTCGCCCTTTC-----GGGCCG                                          |
| Pxlo | GATG--GAAAGGGGGCGGAC-----TTTT-----GTCCATCTCGCCCTTTC-----GGGCCG                                             |
| Pctr | GGTG--GGAAGGGGGCG-----CGCCCTTT-----CGCCCTTTC-----GGGCCA                                                    |
| Apsa | GATG--GAAAGGGGGCGGA-----CGCCCGCTTT-----TCGCCCCCTTTC-----GGGCCG                                             |
| Cabe | CGTA--GGCGAATGGCGCGGT-----CGAGATGTTTT-----ACCGCCGCC-----CCGCC                                              |
| Bzze | ATCA--GAAAGGGGGCGCGGG-----TTCCCG-----CCCTCGCGCCCTTTC-----GGGCCG                                            |
| Siim | GATG--GAAGGGGGCGA-----TAGGAATTGCTGT-----TCGCCCTTC-----GGGCCG                                               |
| Ctru | GATT--GAAAGGGGGCGCCAGC-----CGCTC-----GCTCGCCCTTTC-----GGGCCA                                               |
| Dpbr | ATGG--GAAAGGGGGCG-----CAGCCCGCTTGT-----CGCCCTTTC-----GGGCCA                                                |
| Caki | TAGA--TGAAGGGGGCG-----ACTGTCCGTTTT-----CGCCCTTTC-----GGGCCG                                                |
| Phja | TAGA--TGAAGGGGGCGA-----CAAATCCCCCT-----TTCGCCCTTTC-----GGGCCG                                              |
| Brne | GTCA--GGGTGAAGGTA-----TTTTG-----TACCATTCACTT-----CACTATC                                                   |
| Gamo | TAGA--TGAAGGGGGCGA-----CATTGCGCCCT-----TCGCCCTTTC-----GGGCCG                                               |
| Lolo | TAGA--TGAAGGGGGCGA-----CATTGCGCCCT-----TCGCCCTTTC-----GGGCCG                                               |
| Batr | not found                                                                                                  |
| Prmy | GGAT--CCGAGGGGGCGGA-----CCCCCCCCCT-----TCGCCCTCGG-----GGGCC                                                |
| Lose | AGAT--CGAAAGGGGGCGGAA-----ATTCCGCC-----TTCGCCCTTTCG-----GGGCC                                              |
| Loam | GATG--GAAAGGGGGCGGA-----TTATCCGCCGATT-----TCGCCCTTTC-----GGGCC                                             |
| Chab | GATG--GAAAGGGGGCGAC-----AGATCCG-----GTTTCGCCCTTTC-----GGGCCG                                               |
| Chto | GATG--GAAAGGGGGCGAC-----AGTCCG-----GTTTCGCCCTTTC-----GGGCCA                                                |
| Majo | ATGA--AAGGAGGGG-----TTCCTC-----CCCCTCCTT-----CCCTTTCAGGCCG                                                 |
| Hlst | AAAA--TGCGGACGGC-----AGCATCTTTCG-----GGCGTCCGCA-----AATTGGACC                                              |
| Clpe | ATGT--GAAAGGGGGCGACGG-----CCCGT-----CCTCGCCCTTTC-----GGGCCA                                                |
| Mlmr | GATG--GAAAGGGGGCGGA-----CAGCCCGCGTT-----TCGCCCTTTC-----GGGCCA                                              |
| Crcr | AGAG--GGGGAGGGCGGA-----TGGAAATTT-----TCGCCCTGTTTC-----GGATCCG                                              |
| Muce | AAGG--GGGGAGGGCGGA-----TAGGATTT-----TCGCCCTGTTTC-----GGATCCG                                               |
| Bege | GATT--GAAAGGGGGCGGAT-----CGTCTCGTTTT-----ATCGCCCTTTC-----GGGCCG                                            |
| Mela | AGAT--GAAAGGGGGCGAC-----GGCGTGTTT-----GTCCGCCCTTTC-----GGGCCG                                              |
| Hats | AGAT--GAAAGGGGGCGGAT-----CGCCCGTTTT-----ATCGCCCTTTC-----GGGCCG                                             |
| Orla | GATG--GAAAGGGGGCGGA-----CGTCCCGTTTT-----TCGCCCTTTC-----GGGCCG                                              |
| Cosa | GATG--GAAAGGGGGCGGAT-----CGGCTCGTTTT-----ATCGCCCTTTC-----GGGCCG                                            |
| Exvo | GATT--GAAAGGGGGCGGAT-----CGAAGTGTGTT-----ATCGCCCTTTC-----GGGCCG                                            |
| Depa | GATG--GAAAGGGGGCGGA-----TCGGCCGATTTA-----TCGCCCTTTC-----GGGCCG                                             |
| Rima | GATC--GAAGAGGGCGGAT-----CGGCTTCTTT-----ATCGCCCTTTC-----CGGGCCG                                             |
| Fuol | GATT--GAAAAGAGGGCGGAT-----CGGACTCGTTTT-----ATCGCCTTTC-----GGGCCG                                           |
| Gmaf | GATT--GAAAGGGAGCGGAT-----CGTCGATTT-----ATCGCTCCCTTTC-----GGAGCCG                                           |
| Xeei | GATG--GAAAGGGGGCGGAT-----CGTTCGATTT-----ATCGCCCTTTC-----GGGCCG                                             |
| Pros | TGTG--GAAAATGGCGCATC-----CGCC-----GGTCCGCATTTTC-----GGGCCG                                                 |
| Scmi | GATG--GAAAATGGCGCAC-----CTGCC-----GGTCCGCATTTTC-----GGGCCG                                                 |
| Rolo | GATG--GAAAGGGGGCGCGCC-----ATTT-----GGTCCGCCCTTTC-----GGGCCG                                                |
| Cere | GATG--GAAGGGGGGGATT-----CGCTC-----GGTCCGCCCTTTC-----GGGCCG                                                 |
| Daga | GATG--GAAGGGGGCG-----CGACCCTCGT-----CGCCCATTC-----GGAGCCG                                                  |
| Anco | GATG--GAAAGGGGGCGCGC-----ATCCGCTCG-----GTCCGCCCTTTC-----GGGCCG                                             |
| Dmve | GGTT--CGAGAGGGGGCG-----CGACCGCCCGGT-----CGCCCTCTCG-----GGGCCG                                              |
| Dmar | ATGG--GAAAGGGGGCGCGCC-----TGC-----GGTCCGCCCTTTC-----GGGCCG                                                 |
| Anka | GATG--GAAAGGGGGCGGATT-----CCGCTC-----GGTCCGCCCTTTC-----GGGCC                                               |
| Moja | GATG--GAAAGGGGGCGCGC-----ATCCGCTC-----GGTCCGCCCTTTC-----GGGCCG                                             |
| Hoja | GATT--GAAAGGGGGCGGCTT-----CCAGCTT-----GGTCCGCCCTTTC-----GGGCCG                                             |

|      |      |                      |       |                 |       |                   |       |             |
|------|------|----------------------|-------|-----------------|-------|-------------------|-------|-------------|
| Bede | AGAT | --GAAAGGGGCGGCGC     | ----- | CCCCCT          | ----- | GCTCGCCCCCTTTC    | ----- | GGGCCC      |
| Besp | AGAT | --GAAAAGGGGCGGCGCC   | ----- | ATCT            | ----- | GGTCCGCCCTTTTC    | ----- | GGGCCC      |
| Mybe | AGAT | --GAAAGGGGCGCGGAT    | ----- | AATGTG          | ----- | GTCCGCCCCCTTTC    | ----- | GGGCCC      |
| Osja | AGAT | --GAAAGGGGCGG        | ----- | CAGAGGGGCGGTT   | ----- | CGCCCCCTTTC       | ----- | GGGCCC      |
| Sgro | AGAT | --GAAAGGGGCGG        | ----- | CTTCATTCTTGATT  | ----- | CGCCCCCTTTC       | ----- | GGGCCC      |
| Pzpa | GGAT | --TAGAAAGGGAA        | ----- | CACCCTCT        | ----- | TTCCCTTCTA        | ----- | GGCCA       |
| Zeja | GGAT | --TAGAAAGGGGCGAG     | ----- | ACTGCCCC        | ----- | CTTCCCCCTTCTA     | ----- | GGCCA       |
| Zne  | GGAT | --TAGAAAGGGGG        | ----- | CATTAGCCCCCTT   | ----- | CCCCCTTCTA        | ----- | GGCCC       |
| Zefa | GGAT | --TAGAAAGGGGG        | ----- | CGACGCCCCCTT    | ----- | CCCCCTTCTA        | ----- | GGCCC       |
| Acni | ATGA | --GAAAGGGGG          | ----- | CGACGCCCCCTT    | ----- | CCCCCTTTC         | ----- | AAGCCA      |
| Ncrh | ATGA | --GAAAGGGGG          | ----- | CGACGCCCCCTT    | ----- | CCCCCTTTC         | ----- | AAGCCA      |
| Agca | GATT | --GAAAGGGGCGGAT      | ----- | TGCAAGTTGGATT   | ----- | ATCCGCCCCCTTTC    | ----- | GGGCCC      |
| Hydy | TGAT | --GAAAGGGGCGGA       | ----- | ACCGTCCGATTC    | ----- | TCCGCCCCCTTTC     | ----- | GGGACC      |
| Gsac | CGAT | --GAAAGGGGCGGAA      | ----- | CAGTCCGCATC     | ----- | TTCCGCCCCCTTTC    | ----- | GGGTCC      |
| Pevo | GTAG | --ATGAAAGGGGCGGAA    | ----- | CCCCTCCCCCTT    | ----- | TTCCGCCCGCTTTCGT  | ----- | GGCCC       |
| Hiku | AGAT | --GAAAGGGGCGGAA      | ----- | TTTCCCGCT       | ----- | TTCCGCCCCCTTTC    | ----- | GGGCCC      |
| Inpa | ATGG | --GAAGGGGCGGAA       | ----- | GCTTT           | ----- | TTTCGCCCCCTTTC    | ----- | GGGCCC      |
| Auch | AGTT | --CGGAAGGGGCGG       | ----- | CAACCGTCCCT     | ----- | CGGCCCTTCG        | ----- | GGCCA       |
| Fico | AGAT | --GAAAGGGGCGGAAAG    | ----- | CATCTGTTAT      | ----- | CTTCCGCCCCCTTTC   | ----- | GGGCCC      |
| MacS | GATG | --GAAAGGGGCGGA       | ----- | AAACCCCGCCTC    | ----- | TCCGCCCCCTTTC     | ----- | GGGCCC      |
| Moal | GGAT | --AAAAGAGCGGA        | ----- | GAATTTTT        | ----- | TCCGCTCTTTT       | ----- | GGGCCC      |
| Syma | AGAT | --GAAAGGGGCGGC       | ----- | CGAGGCGGAAATT   | ----- | GCCGCCCCCTTTC     | ----- | GGGCCC      |
| Mafa | GATT | --GAAAGGGGCGG        | ----- | GGGAGGATTTT     | ----- | CGGCCCTTTC        | ----- | GGGCCC      |
| Dcpe | ATCG | --GAAGGGGCGGGGA      | ----- | CGCCCCCTCCTT    | ----- | TCCCGCCCCCTTC     | ----- | GGGCCC      |
| Dcti | GTTG | --GAAGGGGCGGGG       | ----- | AAATTTTTCCCCCGC | ----- | TCCCGCCCCCTTC     | ----- | GGGCCC      |
| Hehi | ATTA | --GAAAGGGGCGG        | ----- | CATTCCGCCCGTT   | ----- | CGGCCCTTTC        | ----- | GGGCCC      |
| Stam | ATGG | --GAAAGGGGCGGA       | ----- | CAATTTTGCGCATC  | ----- | TCCGCCCCCTTTC     | ----- | GGGCCC      |
| Hogi | GATT | --GAAAGGGGCGGA       | ----- | CAGCTTTGTTTT    | ----- | TCCGCCCCCTTTC     | ----- | GGGCCC      |
| Erzo | GATG | --GAAAGGGGCGGA       | ----- | CAAGGCTGCCAATC  | ----- | TCCGCCCCCTTTC     | ----- | GGGCCC      |
| Hxot | GATG | --GAAAGGGAGCGGA      | ----- | ACAGTTTGCCATC   | ----- | TCCGCTCCCTTTC     | ----- | GGGTCC      |
| Core | GATG | --GAAAGGGAGCGGA      | ----- | CAGCATGCTCATT   | ----- | TCCGCTCCCTTTC     | ----- | GGGTCC      |
| Apve | GATA | --GAAAGGGGCGGA       | ----- | CAGCATGTCCATC   | ----- | TCCGCCCCCTTTC     | ----- | GGGTCC      |
| Ltjp | GATT | --GAAAGGGGCGGA       | ----- | TGAGCCCGTTGATT  | ----- | TCCGCCCCCTTTC     | ----- | GGGCCC      |
| Laja | GATG | --GAGAGGGGCGGA       | ----- | TTCTCGTGGT      | ----- | TCCGCCCCCTTTC     | ----- | GGGCCC      |
| Syja | GATG | --GAAAGGGGCGGA       | ----- | TTTTCTCGGT      | ----- | TCCGCCCCCTTTC     | ----- | GGGCCC      |
| Epme | GATT | --GAAAGGGGCGGGTGAA   | ----- | TCTAAGTTATT     | ----- | TTACCCGCCCCCTTTC  | ----- | GGGCCC      |
| Grse | AGGT | --CGAAAGGGGCGGATG    | ----- | CGCCCGCGGTT     | ----- | TATCCGCCCTTTCG    | ----- | GGCCC       |
| Clja | TGGA | --CGAAAGGGAGCGGATCAA | ----- | CTCGGATT        | ----- | TTATCCGCTCCCTTTCG | ----- | GGCCC       |
| Ogcy | GATG | --GAAAGGGGCGGC       | ----- | TCT             | ----- | GCCCCCTTTC        | ----- | GGAGCCC     |
| Plna | GATG | --AAGGGGCGGAT        | ----- | TACAATTGTTTT    | ----- | ATCCGCCCCCTT      | ----- | TCGGGCCC    |
| Lema | GATG | --GAAAGGGGCGGA       | ----- | CGGCTCATCGCCTT  | ----- | TCCGCCCCCTTTC     | ----- | GGGCCC      |
| Etzo | ATGG | --GAAAGGGGCGGA       | ----- | CAGGCCCTGTTT    | ----- | TCCGCCCCCTTTC     | ----- | GGGCCC      |
| Apse | GATG | --GAAAGGGGCGGA       | ----- | CACCGCGGTTT     | ----- | TCCGCCCCCTTTC     | ----- | GGGCCC      |
| Epde | GATG | --GAAAGGGGCGGA       | ----- | CTGCCCCCGATT    | ----- | TCCGCCCCCTTTC     | ----- | GGGCCC      |
| Sija | GATG | --GAAAGGGGCGGAT      | ----- | CGGAATTTTT      | ----- | ATCCGCCCCCTTTC    | ----- | GGGTCC      |
| Bsja | GATG | --GAAAGGGGCGGA       | ----- | TATTGAATATCCGCC | ----- | TCCGCCCCCTTTC     | ----- | GGGCCC      |
| Ecna | AGAT | --GAAAGGGGCGGA       | ----- | CATTATAAATGTT   | ----- | TCCGCCCCCTTTC     | ----- | GGGCCC      |
| Cohi | ATTG | --ATGGGCGGG          | ----- | CGGATTTTT       | ----- | CCCGCCCAT         | ----- | TTTCCGAGCCC |
| Caar | AGAT | --GAAAGGGGCGGAT      | ----- | TGTGTTTGATT     | ----- | ATCCGCCCCCTTTC    | ----- | GGGCCC      |
| Came | AGAT | --GAAAGGGGCGGAT      | ----- | TGATTCTGATT     | ----- | ATCCGCCCCCTTTC    | ----- | GGGCCC      |
| Mema | GATG | --GAAAGGGGCGGAT      | ----- | CAATAAGTTGATT   | ----- | ATCCGCCCCCTTTC    | ----- | GGGCCC      |
| Lenu | GATT | --GAAAGGGGCGGGT      | ----- | CAGAGTTTGTTA    | ----- | ACCCGCCCTTTC      | ----- | GGGCCC      |
| Brja | GGAT | --GAGCGGAGCGGAAAGGA  | ----- | AGTC            | ----- | TTTTTTCGCTCCGTT   | ----- | GGGCCC      |
| Plma | AGAT | --GAAAGGAGCGGAAA     | ----- | AAGTCTGTAC      | ----- | TTTCGCTCCTTTC     | ----- | GGGCCC      |
| Emst | GATG | --GAAAGGGGCGGA       | ----- | CTATCCGCCGATT   | ----- | TCCGCCCCCTTTC     | ----- | GGGCCC      |
| Ptti | GATG | --GAAAGGGGCGGA       | ----- | TTATCTGTCTGATT  | ----- | ATCCGCCCCCTTTC    | ----- | GGGCCC      |
| Losu | ATAT | --GAAGGGGCGGATA      | ----- | TGCTTTTTTT      | ----- | TATCCGCCCTT       | ----- | CGGGCCC     |
| Geoy | ATTG | --GAAGGGGCGGA        | ----- | CTTCCGCTCGTT    | ----- | TCCGCCCCCTTC      | ----- | GGGCCC      |
| Dipi | GATG | --GAAAGGGGCGGA       | ----- | TCGTCTCTGTTTT   | ----- | TCCGCCCCCTTTC     | ----- | GGGCCA      |
| Pama | ATGG | --GGAGGGGCGGGTA      | ----- | TAACCCCTCCT     | ----- | TACCCGCCCCCTTC    | ----- | GGGCCG      |
| Leob | GATG | --GAAAGGGGCGGA       | ----- | CTATTTAGGCGGT   | ----- | TCCGCCCCCTTTC     | ----- | GGTCCG      |
| Neba | AAAG | --GAAAGGGGCGGG       | ----- | CGTCTCGCCCT     | ----- | CCCGGCCCTTTC      | ----- | GGGCCG      |
| Pdpl | GGTA | --GATGAAAGCGGGC      | ----- | CAGAGAAGAGTTTT  | ----- | GCCCGCTTTATATT    | ----- | CGGTCCG     |
| Nimi | AATG | --GAAAGGGGCGGG       | ----- | CTTTGCCCCGCT    | ----- | CCCGGCCCTTTC      | ----- | GGGCCG      |
| Uptr | GATG | --GAAAGGGGCGGGG      | ----- | CAT             | ----- | TTTTCCGCCCTTTC    | ----- | GGGCCG      |

|      |                                                                      |
|------|----------------------------------------------------------------------|
| Pesc | GATG--GAAAGGGGCGGGAG-----CCG-----CTTTCGCCCTTTC-----GGGCCC            |
| Baar | GATG--GAAAGGGGCGGAT-----TTTTCCGGT-----ATCCGCCCTTTC-----GGGCCA        |
| Moar | GATG--GAAAGGGGCGGAT-----TTATTTTTGATT-----ATCCGCCCTTTC-----GGGCCC     |
| Toja | GATG--GAAAGGGGCGGAT-----TTATCTGTTGATC-----ATCCGCCCTTTC-----GGGCCC    |
| Chau | GATT--GAAAGGGGCGGA-----CTGGCCGCTTTT-----TCCGCCCTTTC-----GGGCCC       |
| Chse | GATG--GAAAGGGGCGGA-----TGAATCTGTTGATT-----TCCGCCCTTTC-----GGGCCC     |
| Enar | GATG--GAAAGGGGCGGA-----AAATTGTTCCGATC-----TCCGCCCTTTC-----GGGCCA     |
| Hpty | GATG--GAAAGGGGCGGA-----CTTTTTGGT-----TCCGCCCTTTC-----GGGCCC          |
| Nana | GATG--GAAAGGGGCGGG-----CGGTCGCGATT-----CCCGCCCCTTTC-----GGGCCC       |
| Mcst | GATG--GAAAGGGGCGGA-----CGCCCCCGCT-----TCCGCCCTTTC-----GGGCCC         |
| Rhox | GATG--GAAAGGGGCGGA-----CCCTAAAGGGTTTA-----TCCGCCCTTTC-----AGGCCC     |
| Opfa | TTGG--GAAAGGGGCGGA-----TAGGTCGCCCGGT-----TCCGCCCTTTC-----GGGCCC      |
| Paar | GATG--GAAAGGGGCGGAA-----AAGCCGATCC-----TTCCGCCCTTTC-----GGGCCA       |
| Gozo | AGAT--GAAAGGGGCGG-----CGCCCCTTTTCGCCCCTTT-----CGCCCCTTTC-----GAGGCCA |
| Ackr | not found                                                            |
| Elev | AGAT--GAAAGGGGCGGA-----CTCCCCCCTT-----TCCGCCCTTTC-----GGAGCCC        |
| Trdu | ATTG--GAAAGGGGCGGG-----CGGAGATTTT-----CCCGCCCCTTTC-----GGGCCC        |
| Amoc | GATG--GAAAGGGGCGGA-----CGGTTTTTT-----TCCGCCCTTTC-----GGGCCA          |
| Hame | GATG--AGGAATGGGGCGGAA-----CCGCCGTT-----TTCCGCCCATTCCT-----TTCGGGCCC  |
| Chso | GATG--GAAAGGGGCGGG-----CAATCATTGGCCCGTT-----GCCCGCCCCTTTC-----GGGCCC |
| Lyto | GGAT--GAGGGGGGCGGA-----ACAGTCGGAATC-----TCCGCCCCCTTC-----GGATCC      |
| Encr | GGAT--GAAAGGGGCGGAA-----CAGTTCGTAATC-----TTCCGCCCTTTC-----GGATCC     |
| Bvar | GATT--GGGGGGGGGAA-----AAAACCCCC-----TTTCCCCCCCCT-----CCTGGCCC        |
| Noco | ATGG--AAAGGGGCGGA-----CAACCCGCCCT-----TCCGCCCTTT-----GGGCCA          |
| Chsp | AGAT--AAAAGGGGCGGAG-----ATCGG-----TTTCCGCCCTTT-----GGGCCA            |
| Arja | GATG--GAAAGGGGCGGA-----CAGCTTGGCCATC-----TCCGCCCTTTC-----GGGTCC      |
| Pase | ATGG--GGGGCGGAA-----TTATT-----TTTCGCCCC-----AAAAAATTCGGGCCC          |
| Trel | AAGC--CGGGGGGGGGA-----CCCCCCTT-----TCCCCCCCCCG-----ATCTGCCCG         |
| Lifa | TGAA--AGGGGCGGGGAA-----CGCCGCCCTTT-----TTCCCGCCCTTT-----CAGAACC      |
| Acur | ATCG--AAGTGGGGGGGGGG-----CCCCCCCCACC-----CCCCACCCCCCATT-----CGAGCCT  |
| Ampe | AGAT--GAAAGGGGCGGA-----TTTTCCCCGGT-----TCCGCCCTTTC-----GGGCCA        |
| Urja | not found                                                            |
| Enet | GTGT--GAAAGGAGGCGGA-----CGCGGAATTT-----TCCGCTCCCTTTC-----GGGCCC      |
| Ptbr | GATT--GAAAGAGGCGGG-----CGGACT-----TTCCGCCCTTTC-----GGGCCC            |
| Safa | GATG--GAAAGGGGCGGG-----CCGGATTT-----TCCGCCCTTTC-----GGGCCC           |
| Icae | ATGG--GAAAGGGGCGGA-----AAAGCCTTTTTCC-----TCCGCCCTTTC-----GGGCCA      |
| Asmi | TAGA--TGAAAAGGGGGGGGG-----CCCCCCTT-----TCCCCCCTTTTCCA-----GAACC      |
| Foal | AGAT--TGAAAGGCGGA-----CAGTCCCCCT-----TCCGCCTTTCA-----GGCCC           |
| Drze | ATGT--GAAAGGGGCGGG-----AAGGTACCGCCTCC-----CCCGCCCCTTTC-----GGGCCC    |
| Rhas | TGGA--AAAGGGGCGGAG-----AATCTCTCGA-----TTCTCGCCCCCTT-----CGGGCCA      |
| Elac | GATA--GAAAGGGGCGGA-----CGGCCGATT-----TCCGCCCTTTC-----GGGCCC          |
| Kugu | GATG--GAAAGGGGCGG-----CCTTTTTTT-----CCGCCCTTTC-----GGGCCC            |
| Plor | GATT--GAAAGGGGCGGA-----CAGTTTGTCTGTT-----TCCGCCCTTTC-----GGGCCC      |
| Sgun | GATG--GAAAGGGGCGGA-----CTATCCGCGCGT-----TCCGCCCTTTC-----GGGCCC       |
| Zaco | GATG--GAAAGGGGCGGG-----TCATATTCTGATT-----CCCGCCCCTTTC-----GGGCCC     |
| Zbfl | AGAT--GAAAGGGGCGGAC-----ATATTTTTGGTC-----GTCCGCCCTTTC-----GGTCCA     |
| Spba | GATG--GAAAGGGGCGGA-----TTATTTATGATTT-----TCCGCCCTTTC-----GGGCCC      |
| Game | ATGG--GAAAGGGGCGGA-----AATTTGCCCC-----TCCGCCCTTTC-----GGGCCC         |
| Thth | ATTG--GAAAGGGGCGGAA-----AAGTTTTTCC-----TTCCGCCCTTTC-----GGGCCC       |
| Xigl | GATG--GAAAGGCGGAC-----AATTATATTGCC-----GTCCGCCCTTTC-----GGGCCC       |
| Hyja | GATG--GAAAGGGGCGGA-----AAATTTTTTCC-----TCCGCCCTTTC-----GGTCCC        |
| Psan | GATG--GAAGAAGGCGGAAA-----TCTTTTT-----TTTCCGCCCTTTC-----GGCCCC        |
| Cupa | GATG--GAAAGGGGCGGAA-----AAGTTTTTCC-----TTCCGCCCTTTC-----GGGCCC       |
| Mpch | AGAT--CGAAAGGGGCGGA-----CGGAAATTT-----TCCGCCCTTTC-----GGCCC          |
| Char | GATG--GAAAGGGGCGGAT-----CGGCTTTTTTT-----ATCCGCCCTTTC-----GGGCCC      |
| Pser | ATAG--GAAGGGGCGGG-----CAGCCCCCTCC-----CCCTCGCCCCCTTC-----GGGCCC      |
| Prol | AGAT--GAAAGGGGCGGAT-----TGACCCGTCGATT-----ATCCGCCCTTTC-----GGGCCA    |
| Plbi | AGAT--GAAAAGGGGCGGAA-----CAAATCATTGATT-----TTCCGCCCTTTC-----GGGCCC   |
| Calu | GATG--AAGGGGCGGA-----CAGGCCCTCC-----TCCGCCCTT-----GGGGG              |
| Papa | not found                                                            |
| Sufr | GATT--GAAAGGGGCGGATCAA-----TTTTGTT-----TTATCCGCCCTTTC-----GGGCCC     |
| Stci | AGAT--GAAAGGGGCGGCC-----CCCCCCCCACT-----GGCGCCCCTTTC-----GGGCCC      |
| Taru | GATT--GAAAGGGGCGGA-----TCGTTTTGTT-----TCCGCCCTTTC-----GGGCCC         |
| Rala | GATG--GAAAGGGGCGGA-----TTTGATTCTGATC-----TCCGCCCTTTC-----GGGCCC      |
